# Supplementary material for: Stimulus salience determines defensive behaviors elicited by aversively conditioned serial compound auditory stimuli
Source: eLife journal article supplement (doi:10.7554/elife.53803), 2020-03-27
Supplement: supp [file elife-53803-supp-v1.zip]

Archive with 15 entries (15 files):
- elife_poa_e53803_Transparent_Reporting_File.pdf
- elife_poa_e53803_Figure_2_source_data_1.xlsx
- elife_poa_e53803_Figure_1_source_data_1.xlsx
- elife_poa_e53803_Figure_3_source_data_1.xlsx
- elife_poa_e53803_Figure_3_source_data_2.xlsx
- elife_poa_e53803_Figure_2_source_data_2.xlsx
- elife_poa_e53803_Figure_1_figure_supplemnt_1_source_data_2.xlsx
- elife_poa_e53803_Figure_1_figure_supplement_2_source_data_2.xlsx
- elife_poa_e53803_Figure_4_source_data_1.xlsx
- elife_poa_e53803_Figure_1_figure_supplement_2_source_data_1.xlsx
- elife_poa_e53803_Figure_1_figure_supplement_1.pdf
- elife_poa_e53803_Figure_1_figure_supplement_1_source_data_1.xlsx
- elife_poa_e53803_Figure_4_source_data_2.xlsx
- elife_poa_e53803_Figure_1_figure_supplement_2.pdf
- elife_poa_e53803_Figure_1_source_data_2.xlsx
