# Supplementary material for: Stimulus salience determines defensive behaviors elicited by aversively conditioned serial compound auditory stimuli
Source: eLife journal article supplement (doi:10.7554/elife.53803), 2020-03-27
Supplement: supp [file elife-53803-supp-v1.zip › elife_poa_e53803_Figure_1_figure_supplement_1.pdf]

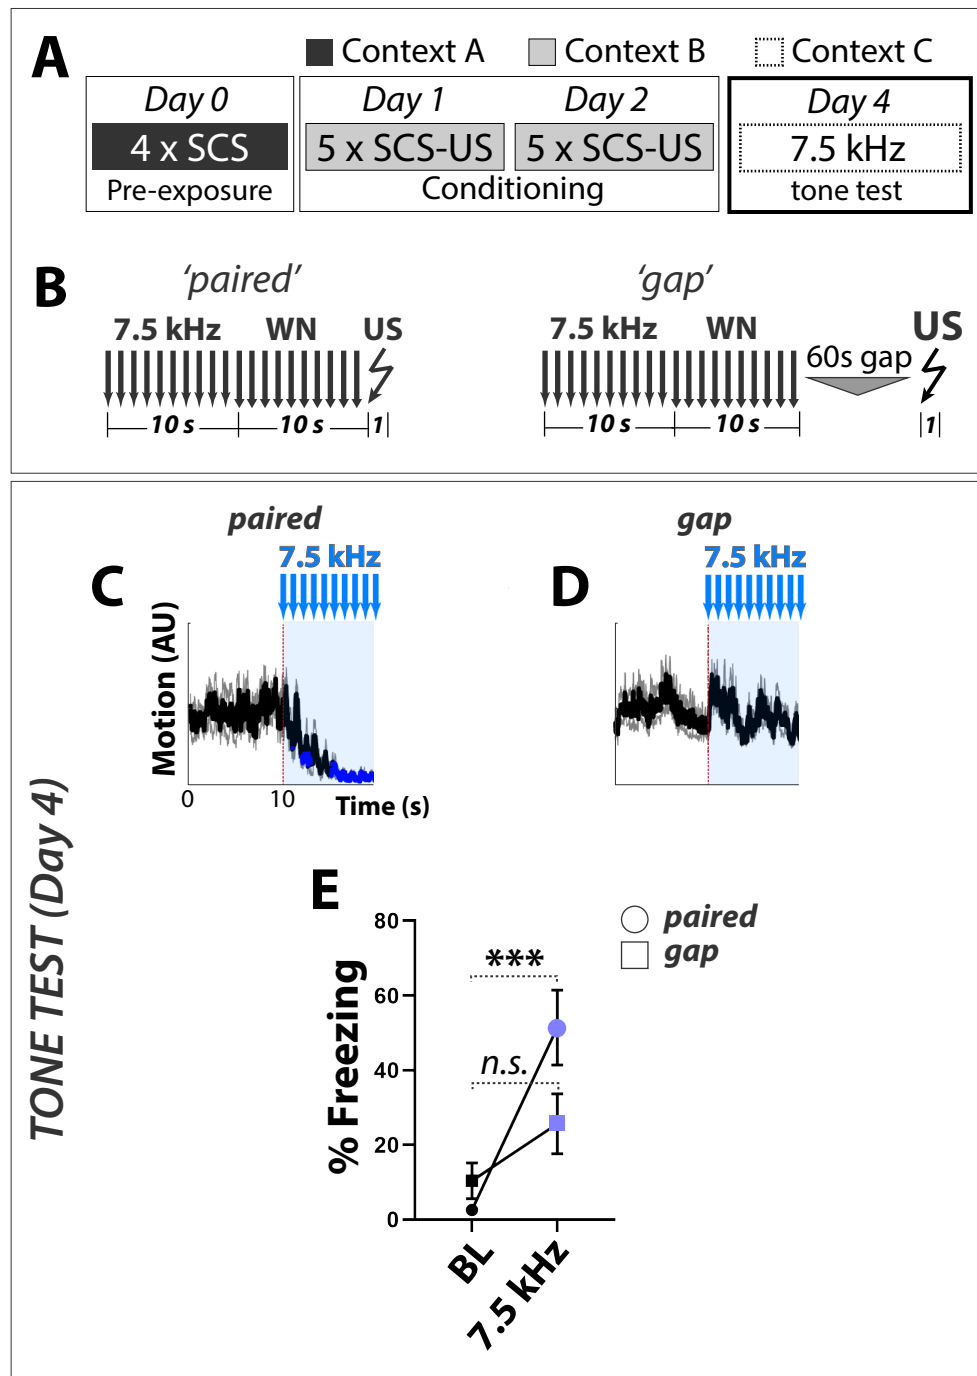

**Figure 1-figure supplement 1**

Mice trained in a paired SCS protocol acutely freeze to tone presentation in a novel context, demonstrating Pavlovian Conditioning
