# Supplementary material for: Stimulus salience determines defensive behaviors elicited by aversively conditioned serial compound auditory stimuli
Source: eLife journal article supplement (doi:10.7554/elife.53803), 2020-03-27
Supplement: supp [file elife-53803-supp-v1.zip › elife_poa_e53803_Figure_1_figure_supplement_1_source_data_1.xlsx]

## Sheet: Measurements, tone test plot
Figure 1–figure supplement 1 Source Data 1
Mouse #	1	2	3	4	5	6	7	8
Paired group
BL	1.92593	0.722222	1.57407	2.55556	2.51852	7.31481	0	3.88889
7.5KHz tone	78.3333	53.6667	12.3333	62	84.3333	7.66667	66.3333	46.6667
Gap group
BL	5.51852	2.14815	36.4815	17.3148	3.5	2.44444	5.22222
7.5KHz tone	59.6667	47	19.6667	30.3333	1.66667	9.33333	11.6667

## Sheet: Motion traces
PAIRED	Mouse 1	Mouse 2	Mouse 3	Mouse 4	Mouse 5	Mouse 6	Mouse 7	Mouse 8			GAP	Mouse 1	Mouse 2	Mouse 3	Mouse 4	Mouse 5	Mouse 6	Mouse 7
	1468	420	1014	817	828	840	537	1008				739	893	0	1	728	40	0
	1060	474	555	970	605	848	644	159				509	301	0	109	567	1	103
	823	267	941	1117	633	416	994	59				1025	763	0	0	441	6	164
	778	212	1404	977	521	828	864	58				1109	611	0	48	633	10	0
	850	109	973	1029	285	816	573	17				1099	369	0	29	605	177	0
	1018	331	1413	1125	488	916	229	1				586	739	0	76	599	582	6
	487	196	922	1070	408	901	728	0				577	256	0	3	666	577	0
	713	255	994	1072	67	344	1111	1				429	483	0	32	833	262	16
	537	331	1088	1312	11	889	947	0				19	224	0	0	921	277	7
	655	83	925	1540	250	794	1287	0				215	619	0	0	813	580	12
	618	0	1082	1282	127	1000	1352	0				410	567	0	7	366	574	109
	567	25	1146	1359	232	560	1113	0				954	369	0	1	691	611	85
	776	37	1021	1045	0	985	1500	56				1321	282	0	145	742	808	1
	894	249	1246	999	247	400	1567	659				1110	538	0	158	1085	399	0
	773	161	983	1132	146	646	1506	843				1209	445	0	12	737	589	135
	448	0	1275	947	123	1035	1302	682				1402	715	0	161	749	206	192
	365	250	1091	754	7	331	1108	1067				938	572	0	373	885	174	162
	506	290	1209	719	270	935	971	1004				1481	714	0	332	1003	201	0
	453	394	702	628	1	511	1055	654				1500	437	0	327	717	321	168
	762	496	1048	807	208	778	634	579				1354	340	0	454	865	576	177
	780	446	684	857	2	501	516	603				1034	580	0	609	528	569	206
	956	430	820	1020	168	552	786	718				764	597	0	531	691	753	0
	993	147	986	540	173	919	852	559				920	510	0	524	770	370	0
	902	524	473	172	198	681	881	998				1073	573	0	143	902	757	172
	1021	253	920	419	256	813	931	1074				941	356	0	406	907	685	177
	636	451	600	471	197	411	1091	1108				857	646	0	360	1089	442	69
	999	145	379	940	167	965	1438	977				979	474	0	257	701	517	165
	673	319	383	777	28	414	1324	1037				846	554	0	382	1065	866	196
	452	401	807	816	105	726	1222	1003				392	896	0	390	713	403	123
	1015	483	664	694	193	841	1171	906				1107	855	0	186	1029	777	8
	1145	249	508	544	607	288	1165	1046				551	891	0	553	997	356	138
	564	437	570	883	1044	522	1226	971				1074	802	0	165	1637	789	214
	796	462	819	953	662	828	800	883				718	943	0	564	1723	460	161
	723	460	757	857	544	536	1129	969				480	847	0	508	1344	577	162
	669	511	711	454	858	732	467	1263				693	827	0	414	693	641	228
	1105	502	843	673	293	649	1010	1024				1036	766	0	349	1109	489	0
	1019	421	375	570	708	839	960	898				623	547	0	422	1345	500	164
	945	478	253	732	324	741	766	1067				458	447	0	246	863	804	85
	507	438	855	601	234	498	877	964				1120	303	0	263	867	792	0
	1186	422	1087	567	496	645	597	957				668	462	0	268	894	556	109
	981	466	710	568	174	529	767	1246				900	500	0	158	940	408	168
	917	543	773	791	267	268	954	1251				733	424	0	222	1006	764	127
	149	276	916	770	376	324	914	1474				859	606	0	152	803	762	0
	808	463	743	413	312	522	993	1157				1193	711	0	166	624	935	134
	220	393	792	741	241	367	1023	761				986	877	0	1	701	894	137
	468	504	919	688	284	610	716	888				615	922	0	185	1034	921	177
	667	359	1074	822	297	717	891	1030				664	922	0	0	1257	237	27
	664	434	1059	682	268	608	303	1302				816	601	0	159	1043	794	203
	1051	565	782	812	215	760	837	1159				974	616	0	1	1349	670	113
	1092	605	964	364	204	497	813	1517				1025	668	0	0	1469	252	183
	1286	594	786	608	241	647	300	1876				457	678	0	26	1052	777	39
	678	361	827	612	96	732	435	2270				888	478	0	0	660	746	0
	970	738	1078	558	374	539	965	1999				1027	376	0	109	647	644	12
	437	664	740	557	236	641	905	1853				763	636	0	74	979	838	117
	787	763	1013	673	57	518	932	1987				699	412	0	58	819	882	8
	799	701	1043	715	176	566	77	1865				769	782	0	3	898	728	6
	275	866	1074	615	371	625	924	2083				724	491	0	19	1501	999	171
	442	669	1286	685	181	373	564	1842				517	770	0	0	991	693	60
	1225	606	1301	644	158	689	665	1817				1241	822	0	116	1148	1237	193
	694	560	912	626	139	815	921	1699				1177	576	0	55	1142	826	84
	762	916	1141	993	0	721	1172	2024				926	83	0	0	1082	739	49
	712	570	1280	915	255	906	1315	1524				1012	449	0	7	931	779	136
	467	658	1158	957	176	1141	1164	1847				1220	643	0	95	991	767	100
	598	703	1557	1190	297	917	974	1616				1053	427	0	0	986	235	180
	548	689	1711	879	129	749	948	1441				742	461	0	3	1213	624	79
	611	472	1225	419	4	584	695	2128				1054	556	0	0	1244	759	36
	400	647	1340	648	63	750	967	2157				1266	502	0	2	1425	448	77
	174	708	1277	869	17	955	953	1735				1126	372	0	0	1444	397	4
	549	743	1337	682	185	337	797	1965				1211	459	0	1	989	427	37
	385	513	1057	544	136	751	996	1920				1318	516	0	0	852	362	196
	445	410	1216	65	184	941	1277	2019				721	449	0	0	1055	608	0
	66	543	1060	252	0	748	1055	2341				1271	537	0	4	1296	798	122
	127	486	961	462	83	289	1146	2017				974	684	0	85	1271	702	0
	25	455	942	636	73	596	1422	1817				1197	619	0	2	1442	289	95
	248	329	763	399	289	900	1419	1327				979	227	0	21	689	557	136
	49	352	769	717	273	1057	1470	1254				1117	499	0	47	1518	800	751
	194	270	810	463	144	928	1683	1308				868	632	0	36	1493	683	1301
	37	366	983	471	619	847	2087	1513				540	317	0	25	1400	803	784
	185	429	1095	910	922	862	1963	1589				589	339	0	130	921	650	881
	291	454	995	938	330	925	1986	1390				963	289	0	0	1011	496	881
	175	223	939	762	974	724	2355	1284				1068	595	0	66	1160	535	1313
	344	544	685	1040	855	675	2230	1098				1188	703	0	3	1189	434	1009
	63	581	1111	959	554	262	2739	1137				1486	479	0	20	893	399	794
	78	555	593	786	368	589	2718	1130				936	555	0	11	1010	634	861
	101	656	721	540	467	515	1858	632				947	254	0	13	685	427	1250
	135	490	845	791	896	677	1822	707				1159	493	0	0	809	293	1396
	162	668	1015	697	517	536	1996	869				1106	785	0	0	835	138	1179
	359	502	882	1011	817	666	2153	289				723	910	0	2	576	168	1016
	884	227	756	986	378	657	1654	967				1081	787	0	80	543	124	1195
	254	457	919	870	296	703	1970	555				1464	775	0	0	720	239	935
	981	497	1261	870	555	411	1080	676				832	520	0	95	559	295	1013
	615	320	1136	836	86	709	1141	896				1281	350	0	124	241	447	526
	699	595	913	682	603	478	1136	569				1399	279	0	23	412	390	1521
	819	452	752	900	303	410	1154	472				1176	460	0	75	463	255	1436
	362	337	528	918	261	715	1909	789				1111	833	0	55	380	277	902
	545	512	585	953	397	708	1919	542				1062	790	0	191	305	134	573
	591	344	537	678	255	224	1611	307				924	915	0	190	106	311	638
	594	507	520	632	423	343	1734	554				824	762	0	141	307	405	621
	798	642	690	650	753	544	1913	610				1122	1024	0	120	372	250	418
	556	590	604	607	699	591	1791	51				1696	484	0	185	424	226	850
	862	600	642	844	336	359	1881	510				704	875	0	2	194	265	792
	591	874	352	799	502	406	1476	334				842	315	0	63	193	207	1140
	485	533	258	1140	382	632	2060	285				1006	494	0	79	242	116	1407
	643	1016	625	993	297	642	2009	586				584	433	0	103	232	67	1031
	891	945	871	1181	143	486	2401	348				704	692	0	5	219	114	1273
	632	867	810	1318	226	632	2086	26				723	538	0	149	120	211	1350
	674	615	774	1547	154	477	1930	243				698	512	0	59	143	222	1199
	1006	761	871	1845	210	311	1618	438				626	407	0	94	86	109	679
	314	938	1092	1664	330	254	1844	236				672	538	0	33	163	92	666
	218	770	1171	1136	391	103	1521	172				576	536	0	0	124	99	821
	900	855	1024	1334	384	219	1821	157				672	556	0	0	247	202	549
	906	870	975	1572	191	267	2029	152				732	560	0	0	319	130	961
	547	889	1000	1774	60	187	1693	352				772	528	0	0	977	58	1155
	779	865	723	1470	385	0	2233	107				635	472	0	0	1445	132	739
	677	666	785	1214	223	0	2152	316				931	670	0	58	1712	113	987
	672	784	488	1370	145	0	1990	198				488	625	0	0	1358	178	1247
	1155	632	491	1247	87	0	1601	339				732	723	0	107	1233	72	531
	858	596	767	1786	139	1	1920	296				1147	621	0	77	1305	83	1033
	600	835	625	1859	170	57	1541	292				828	621	0	7	1554	166	1077
	501	629	175	1742	245	0	1936	92				996	651	0	0	1537	33	897
	477	854	871	1565	186	0	2023	200				618	826	0	0	1314	51	1057
	834	372	895	1689	3	0	1916	227				999	880	0	1	703	12	899
	553	642	622	1533	217	0	2063	192				1142	692	0	13	680	2	680
	754	593	545	1212	56	10	1665	166				797	502	0	1	737	91	643
	866	585	535	1270	289	4	1144	387				1268	751	0	1	831	505	687
	664	896	446	1136	92	54	1543	386				288	915	0	1	1346	584	660
	913	590	766	1045	211	155	2059	373				1025	775	0	39	938	401	376
	993	659	1191	1166	47	2	2282	297				1290	445	0	0	613	453	463
	643	841	1684	1318	117	4	1718	419				1620	637	0	0	724	512	359
	872	499	1546	1116	118	0	1325	593				1102	815	0	0	523	333	651
	806	611	1321	1174	279	0	2012	743				882	837	0	0	1305	342	529
	538	215	1486	1585	158	135	1932	681				1075	644	0	4	557	436	476
	590	683	1568	1130	264	118	1668	826				939	596	0	0	975	300	440
	610	517	1334	1457	170	0	1983	865				818	562	0	0	1269	379	483
	468	323	768	1471	73	179	1908	863				586	1081	0	31	928	409	1181
	453	837	993	1403	188	0	1652	1054				1123	426	0	128	708	497	1144
	902	1010	441	956	115	7	1411	940				1124	1014	0	1	691	294	811
	815	626	623	709	299	0	1508	653				547	596	0	90	1115	446	1022
	326	1024	197	698	230	1	1671	888				692	509	0	17	848	521	1175
	508	827	1272	662	228	0	1801	893				1007	751	0	0	528	516	1257
	303	941	1095	665	156	66	1623	917				529	469	0	115	1142	677	1161
	262	1020	1123	913	141	1	892	635				733	824	0	1	640	555	828
	295	720	1157	510	147	0	1339	514				709	866	0	7	1363	604	576
	107	1063	987	659	324	146	1195	377				550	683	0	35	679	609	734
	179	972	997	666	246	0	642	773				1008	695	0	20	1208	491	726
	89	839	1001	633	325	57	1107	825				1157	648	0	4	298	599	597
	16	1124	945	689	337	15	1196	428				728	876	0	71	1270	528	328
	58	434	708	397	594	34	1824	513				1386	620	0	1	393	352	663
	131	723	1184	764	704	0	2258	219				1921	663	0	0	1353	414	999
	48	999	855	559	1035	0	2775	366				1832	760	0	1	623	554	1544
	0	627	1628	664	491	0	2763	408				1730	727	0	22	1100	495	1312
	238	513	1176	609	327	0	2890	807				1216	573	0	10	772	391	1138
	425	816	710	545	777	8	3109	541				1360	707	0	119	1074	462	818
	576	1038	768	507	1018	4	2523	455				1599	775	0	0	873	503	754
	640	1064	1005	444	471	81	2272	683				1539	651	0	53	1485	696	732
	526	1031	1023	739	718	288	1753	716				1526	684	0	20	1012	581	1191
	708	822	1487	543	721	1	1884	650				670	677	0	0	826	713	1610
	724	1359	1620	949	965	140	1944	486				1065	730	0	58	1134	799	1072
	420	543	923	754	809	43	1505	360				1303	725	0	34	1254	606	867
	548	1027	1629	660	853	125	1127	627				1025	520	0	0	1074	567	1140
	395	315	1453	635	761	196	981	656				786	647	0	85	1413	613	497
	473	872	1111	829	818	36	907	491				925	797	0	43	834	664	617
	645	1223	778	447	1007	0	943	779				994	672	0	0	1264	800	870
	411	648	767	366	810	0	860	667				1383	610	0	310	997	791	1525
	580	989	1359	664	422	0	1517	774				1363	642	0	509	1233	707	1663
	921	772	1632	647	866	21	482	862				1185	666	0	479	1270	511	1108
	242	973	1729	718	821	0	1175	1105				1063	655	0	280	1156	435	531
	778	902	1220	836	670	182	572	963				1531	879	0	352	1144	507	787
	765	786	1364	652	510	99	928	1109				1313	763	0	545	700	488	1218
	387	909	1288	923	920	0	1260	1098				1154	632	0	379	1215	450	1252
	426	847	1153	280	502	3	1201	1021				958	568	0	282	873	432	780
	504	847	1606	532	611	406	1742	892				876	930	0	262	1350	327	1057
	384	879	1740	196	776	800	2171	776				1126	553	0	441	988	476	1021
	304	828	1766	171	685	878	1857	605				1579	298	0	510	929	668	371
	457	1023	1109	577	443	738	1539	707				1006	720	0	263	1025	639	1252
	249	591	1191	674	225	524	1570	520				1057	487	0	142	1154	525	1923
	368	1187	1285	486	800	682	1742	310				1347	646	0	178	1341	820	1587
	576	474	1093	307	570	886	1847	391				1158	1015	0	221	1252	1015	1145
	252	1340	1439	614	684	733	2012	438				1153	562	0	262	1289	872	1102
	351	410	1441	787	821	943	1556	366				1095	445	0	378	1052	663	1222
	193	1203	802	642	334	639	1741	534				428	773	0	197	895	613	1231
	151	1238	916	580	509	371	1945	526				326	931	0	351	1181	628	502
	149	870	1426	541	986	659	2162	769				596	891	0	76	1159	771	1088
	233	1006	1117	409	554	624	2374	1017				754	478	0	241	713	619	502
	86	1136	1597	395	434	354	1830	994				508	888	0	98	682	509	769
	49	863	1531	657	873	747	2216	1166				927	580	0	171	864	802	1001
	22	753	1336	136	603	716	2218	983				985	687	0	131	983	657	712
	121	546	1173	700	577	623	1555	743				515	570	0	195	471	746	970
	53	832	921	408	636	596	644	603				479	733	0	7	899	725	1539
	64	568	1438	442	859	179	941	328				803	824	0	93	931	681	1494
	118	857	998	417	665	280	1311	400				641	533	0	138	531	615	662
	95	1076	1069	297	327	451	678	509				552	446	0	70	979	734	414
	147	994	1156	241	544	701	1022	531				704	523	0	54	762	266	1219
	205	647	900	253	495	493	1220	586				568	783	0	120	524	576	1387
	524	539	643	311	458	762	1162	563				426	619	0	0	547	600	943
	795	772	605	483	315	1028	1507	535				611	567	0	0	631	670	806
	569	578	706	485	555	350	1842	378				662	306	0	43	285	489	922
	666	888	875	675	298	712	1502	192				486	468	0	140	724	777	1647
	762	855	397	706	996	518	1031	266				669	444	0	95	645	686	1892
	551	968	1172	1057	384	613	1435	335				441	529	0	1	383	494	1530
	483	865	1027	808	634	603	1225	293				320	341	0	65	448	603	769
	714	756	1172	1105	502	779	1589	170				561	557	0	3	569	767	678
	741	629	817	556	324	429	1170	260				478	218	0	0	75	556	851
	380	1061	781	750	319	474	1059	184				424	567	0	117	653	396	764
	483	167	1019	592	297	402	1073	24				330	348	0	0	568	737	809
	533	956	1367	955	451	514	1407	159				423	628	0	1	390	900	1044
	306	915	1557	690	619	216	1218	205				211	407	0	0	366	494	1052
	489	842	766	715	241	619	1354	79				650	669	0	106	43	928	1056
	627	725	1634	122	75	764	1007	32				347	490	0	140	422	962	1215
	317	840	1650	886	302	816	1325	55				526	460	0	1	335	319	1504
	594	797	1624	841	327	833	1372	71				528	385	0	131	380	1055	1485
	431	739	946	99	91	510	1049	35				482	328	0	8	429	984	578
	565	684	1039	818	224	1018	1319	60				559	410	0	11	403	658	1036
	638	1087	1039	443	19	767	1316	39				433	389	0	127	524	678	1229
	655	267	985	749	227	758	1426	304				487	367	0	65	381	365	681
	672	863	1765	667	313	817	1507	113				420	480	0	53	115	865	1328
	907	1024	1530	201	409	899	1116	47				502	450	0	118	319	930	1121
	564	1172	1268	389	538	511	825	71				529	357	0	88	303	831	796
	773	858	1373	638	809	893	1240	101				457	463	0	9	220	609	1044
	850	910	1308	587	298	538	1105	69				279	226	0	45	390	951	736
	627	1051	1691	407	536	957	832	87				222	587	0	0	206	880	1307
	746	574	1063	808	493	806	740	198				365	477	0	0	131	564	1569
	272	1075	2155	482	535	614	1014	38				425	638	0	0	191	342	1476
	321	473	2322	461	793	387	1095	4				477	747	0	32	266	416	1389
	338	981	2429	650	388	803	797	28				348	598	0	0	279	462	828
	414	700	2640	662	629	621	1260	24				266	359	0	28	198	559	1318
	405	826	2635	276	848	630	896	0				316	530	0	73	94	300	928
	492	804	2082	727	946	555	1211	52				401	496	0	90	0	496	811
	745	504	1423	428	1103	470	1531	6				358	591	0	32	225	436	1154
	1315	737	1339	653	1162	503	1413	34				695	383	0	51	265	373	1443
	1430	939	1459	646	1138	775	1510	189				413	288	0	0	53	606	1139
	1169	443	2028	521	966	537	1212	100				450	329	0	0	171	646	970
	1089	718	2060	640	1062	249	1240	27				446	370	0	48	263	558	1111
	1147	713	1743	407	818	59	1581	206				291	415	0	0	210	449	1501
	961	957	1714	640	832	425	1273	204				210	123	0	114	44	765	1263
	1031	957	1616	744	912	571	1455	74				129	338	0	97	52	961	1020
	1391	636	1509	297	837	318	770	212				29	417	0	0	186	690	1081
	1226	933	2280	952	1132	349	1504	153				68	152	0	41	226	649	1055
	765	398	2462	149	987	414	1974	46				41	349	0	0	166	888	1265
	1178	931	2407	338	852	774	1617	145				0	435	0	14	62	788	654
	604	1056	2022	330	752	375	1754	185				181	422	0	43	48	654	1640
	1077	734	1008	597	1093	568	1507	226				115	337	0	61	247	842	1705
	1094	856	2212	835	988	637	1572	580				31	293	0	1	221	554	1429
	550	1022	1665	172	1079	368	1557	283				130	532	0	100	132	500	1890
	760	1352	1205	709	988	747	1626	629				78	501	0	110	4	494	1438
	668	958	1245	301	341	470	899	298				0	346	0	56	266	492	1158
	777	1203	378	600	1096	314	897	139				0	319	0	64	166	512	1221
	714	608	1090	380	1105	341	715	171				0	324	14	0	78	612	1080
	518	1144	1288	418	785	576	816	523				6	354	100	14	64	793	1026
	1026	1367	1095	266	584	767	1264	339				152	321	6	0	138	933	1365
	1090	889	1647	354	697	600	721	432				150	387	0	110	245	1091	1394
	908	1638	1708	729	1070	440	1150	530				143	455	0	0	149	882	1480
	815	1035	1111	480	777	812	916	376				91	307	0	118	134	761	1234
	1236	1011	553	991	580	481	906	352				48	494	0	13	122	504	891
	1494	1038	941	554	723	222	1217	587				0	340	0	26	250	646	739
	1431	1009	1077	623	289	287	1403	474				0	411	0	0	236	781	1157
	1372	919	1038	591	657	285	935	404				12	259	0	0	206	902	1539
	1351	775	1206	527	372	373	974	501				0	406	0	1	20	912	1081
	1534	968	1147	781	614	484	1126	537				70	279	0	38	254	572	997
	1429	1165	1082	453	439	452	1808	427				80	229	0	0	226	732	760
	1480	687	1423	543	426	349	1911	501				35	425	0	0	29	618	1239
	1379	709	1315	479	552	246	1970	718				139	467	0	113	149	557	1108
	1131	634	1035	486	541	75	2155	828				9	627	0	130	174	591	910
	842	808	478	715	850	101	2439	633				25	475	0	96	187	530	762
	665	773	715	687	797	120	1928	664				7	523	0	1	216	487	667
	853	762	1062	690	818	59	1543	765				14	460	0	6	56	473	937
	1053	878	1488	826	708	139	1566	745				0	629	0	7	13	453	826
	884	810	1615	882	886	433	1363	818				76	457	0	68	170	417	1239
	836	702	1602	814	808	846	1595	1039				76	565	0	1	151	573	1250
	999	456	1285	705	618	479	1971	1009				76	479	0	73	145	733	676
	1084	717	1024	1074	648	59	2298	848				18	257	0	31	23	573	753
	982	560	837	793	583	703	2279	859				32	510	0	74	53	345	812
	842	805	936	561	220	989	2070	703				59	52	0	224	49	681	882
	662	871	1086	312	498	839	1505	904				0	461	0	425	88	304	641
	1459	1200	1462	362	580	592	1477	1091				103	511	0	591	119	587	793
	1233	1204	1730	662	817	818	1397	1288				161	285	0	471	196	466	840
	1401	709	869	894	969	878	1219	933				0	538	0	420	212	6	804
	1038	651	1377	534	826	861	967	715				127	752	0	389	78	356	812
	1388	735	1511	819	645	456	913	757				13	359	0	241	113	91	762
	1264	442	1645	1204	654	569	605	688				2	526	0	375	11	437	994
	1250	682	1854	1144	485	804	888	385				88	554	0	217	209	335	932
	1191	676	1264	807	527	564	680	711				80	450	0	446	172	355	1321
	1311	391	1326	401	381	587	102	293				152	524	0	337	117	387	1134
	1234	999	1417	526	473	807	545	689				89	486	0	366	140	226	866
	1124	703	1173	572	255	580	760	283				120	414	0	234	146	313	683
	951	564	1612	981	188	660	825	653				23	219	0	389	1	110	803
	877	832	1628	598	450	940	836	461				0	455	0	287	80	294	892
	852	996	2065	608	261	621	516	163				116	340	0	355	24	353	814
	726	619	2178	884	452	654	332	501				77	376	0	428	187	405	628
	352	763	1548	1475	296	450	197	78				154	383	0	272	107	577	767
	322	440	1520	1006	131	654	235	380				158	464	0	549	116	278	952
	907	490	2441	896	401	746	4	357				144	546	0	507	134	467	937
	827	823	2013	998	290	656	114	399				73	601	0	118	0	399	1142
	1137	440	2029	1029	555	127	92	369				1	550	0	400	67	248	743
	1425	451	1401	1151	440	638	61	569				38	425	0	317	0	355	621
	1105	213	2036	871	521	410	98	465				63	314	0	273	167	447	783
	1308	614	2298	432	384	543	0	950				45	311	0	420	93	136	538
	1427	869	2549	616	333	358	80	1110				100	460	0	181	184	474	603
	1021	606	1982	578	314	376	0	1153				45	434	0	343	60	653	1064
	997	705	1826	705	247	493	45	1057				186	461	0	167	40	413	667
	1048	558	1888	522	223	474	2	1088				0	377	0	373	25	539	360
	961	355	1570	550	165	511	0	907				11	434	0	406	0	463	823
	793	779	1702	648	240	381	12	973				0	488	0	159	0	433	700
	1023	611	1980	942	558	436	682	1133				105	417	0	535	143	651	713
	1283	285	1980	847	694	441	724	1208				86	535	0	48	177	374	1411
	1658	654	1585	890	652	385	514	1480				113	481	0	546	32	642	1548
	1377	1019	1210	939	1073	531	228	1094				131	520	0	96	514	694	1539
	1051	1121	1590	1043	591	172	247	1096				480	479	2	239	1105	622	873
	759	772	1792	964	872	472	591	1285				805	354	0	578	1237	652	931
	932	695	2220	1089	375	510	1524	1173				282	407	22	644	1310	1148	1102
	929	383	1662	559	344	509	2051	1171				1017	432	140	735	1163	675	1008
	1119	778	1128	447	213	390	2124	1041				990	242	480	661	1155	744	995
	891	439	1131	191	172	211	1920	924				582	391	661	845	1401	607	1597
	813	911	952	597	176	532	1454	647				834	327	740	525	844	608	793
	717	900	686	42	365	366	1086	713				731	287	544	406	925	543	753
	643	698	445	766	119	229	1159	587				618	433	233	656	1119	809	919
	651	235	358	653	243	566	1147	882				596	306	552	795	776	885	829
	424	654	321	84	90	293	1598	1006				498	478	711	765	622	849	1182
	403	530	1	353	25	489	1379	739				609	115	360	298	759	516	1189
	492	967	40	138	263	185	1184	978				387	497	586	723	1019	549	1426
	232	448	421	568	127	457	1506	1430				586	286	744	487	1506	582	1497
	198	593	199	475	77	465	1368	1249				236	499	383	463	912	588	982
	261	150	332	792	107	157	1174	1676				456	453	236	567	892	701	934
	214	889	80	1147	152	531	1000	1262				740	598	755	310	1070	683	1384
	130	403	254	855	3	378	1280	1396				831	394	321	504	792	497	797
	69	571	227	347	252	519	940	1356				631	401	430	461	837	1022	1596
	178	65	307	533	143	494	1283	1061				634	319	178	292	926	870	1464
	382	686	0	396	65	637	1011	681				835	313	351	217	506	783	687
	412	384	284	17	126	224	993	413				802	458	773	596	761	560	985
	249	421	92	421	167	616	913	275				925	90	752	601	1237	710	1269
	184	409	355	474	205	455	499	374				778	505	686	410	1326	413	1782
	118	0	485	91	230	167	1403	494				835	359	231	496	416	415	1564
	224	123	665	337	0	551	1302	789				1022	268	467	416	1167	239	799
	97	6	818	14	87	319	1344	822				974	227	928	381	918	405	925
	302	1	880	237	48	515	1561	943				933	139	557	409	648	489	1318
	102	229	505	106	0	113	1160	1050				316	164	325	460	704	469	1248
	86	77	389	421	147	339	1110	957				964	1	683	301	604	545	1065
	908	0	635	817	12	346	1444	964				783	178	741	278	1125	492	1232
	1172	652	1242	800	324	335	1174	835				316	167	353	484	839	532	1135
	1036	752	1375	1031	279	301	1615	744				512	157	724	549	913	446	644
	772	725	1407	693	207	770	1805	912				700	65	614	709	724	268	685
	735	661	1388	945	440	964	1926	745				727	0	552	987	1033	482	156
	682	675	1318	1010	570	908	1660	999				482	196	435	355	998	331	406
	576	452	1214	474	605	838	1479	903				539	109	427	830	433	165	384
	426	211	1214	914	712	1013	1687	896				309	90	261	675	1089	424	210
	247	582	1064	739	701	1377	1733	909				560	105	343	788	1048	487	444
	356	793	803	755	487	788	1590	367				468	0	187	551	754	484	298
	280	548	416	840	266	647	1552	673				967	135	80	703	668	862	166
	78	343	397	379	162	593	1718	728				1105	95	175	636	1036	774	455
	13	537	580	672	116	719	1920	887				455	87	19	549	1442	750	254
	0	310	347	51	14	688	1764	772				781	125	73	868	157	527	1114
	94	117	369	208	50	597	1605	479				675	89	88	635	1394	503	1656
	116	398	327	389	93	669	1738	739				364	0	302	663	859	560	2189
	9	427	349	463	2	630	1308	452				277	0	257	474	489	451	2816
	3	32	139	347	65	434	1272	730				480	18	115	550	466	688	2320
	0	150	460	0	70	396	924	620				372	60	127	509	512	589	1449
	0	271	181	11	46	274	1341	340				290	31	207	417	1101	672	1567
	2	243	449	4	10	498	1179	750				301	0	297	378	588	464	1404
	1	228	77	77	66	441	749	506				176	53	402	219	714	688	1412
	0	293	489	191	1	495	217	545				0	1	243	368	165	524	1142
	6	120	27	0	8	706	627	646				33	112	57	196	718	565	945
	0	132	334	162	2	388	431	195				149	0	276	259	347	988	1028
	0	137	189	131	2	735	369	553				87	119	268	217	478	459	1476
	0	114	233	103	24	432	582	209				37	95	148	309	376	867	1211
	0	163	178	0	0	855	741	457				124	161	111	241	464	408	431
	1	243	36	212	0	907	985	459				7	337	412	141	466	610	1024
	0	245	227	13	1	790	664	276				326	501	425	166	424	536	1234
	1	417	269	394	30	627	345	421				340	451	576	144	444	585	1303
	22	138	299	487	3	706	393	164				193	479	638	257	712	307	1106
	1	7	332	595	30	691	296	687				279	530	486	14	818	703	1347
	2	53	753	655	0	916	238	608				30	476	819	292	1061	666	1364
	0	51	1226	458	20	805	213	183				138	167	296	115	1435	775	1211
	0	0	1187	497	2	660	204	600				20	519	393	1	1541	950	1514
	0	37	1473	501	0	720	168	470				99	398	744	207	1445	777	1224
	0	113	1717	758	14	751	430	319				3	462	743	237	1403	607	1219
	0	3	1437	946	0	680	374	563				186	381	810	90	1191	352	1533
	0	20	1420	475	0	711	389	182				87	317	494	154	1030	610	1034
	0	342	850	751	1	679	330	381				187	222	548	170	814	414	1467
	0	58	758	109	0	130	71	210				89	149	735	286	524	915	1080
	1	4	879	691	30	619	35	289				91	133	331	5	757	626	1227
	0	3	962	601	0	419	9	280				32	187	609	252	1516	582	1885
	0	327	1062	759	0	531	156	202				7	161	886	15	1461	250	1524
	0	230	588	797	0	550	38	274				11	193	670	215	908	488	1047
	0	0	684	464	0	466	42	153				166	100	453	0	950	301	1396
	0	1	1189	467	0	139	0	143				90	169	817	137	673	321	1227
	0	0	1091	245	3	403	0	38				196	186	871	103	824	340	1300
	0	35	1104	319	0	418	67	170				117	194	814	206	627	421	1425
	0	138	993	51	0	284	2	17				0	100	897	197	971	333	1137
	0	224	1502	331	0	383	28	161				39	3	611	97	558	0	1037
	0	0	1627	419	0	475	1	0				3	0	507	165	1137	1	1337
	0	41	1810	301	0	431	0	36				3	177	684	123	1466	0	1671
	4	132	1731	0	32	103	70	130				133	185	827	192	660	26	1257
	1	254	1243	0	1	235	0	43				92	113	397	105	630	201	595
	0	28	1179	367	42	35	2	151				193	53	957	34	399	141	725
	0	4	1501	413	157	271	0	0				0	0	611	15	956	0	881
	1	16	1119	46	53	96	60	202				108	0	483	0	790	6	901
	4	904	1263	200	68	22	50	96				6	128	461	3	782	46	668
	7	1159	1293	157	4	620	92	80				212	88	120	0	658	1	614
	149	1276	1330	450	95	495	72	245				161	0	356	0	1240	0	696
	442	1302	723	292	36	244	15	436				222	103	717	105	637	145	703
	592	1107	1284	18	30	561	93	459				158	13	998	0	761	159	659
	570	1411	955	0	5	534	146	358				149	91	549	26	946	43	488
	694	1320	1231	3	4	493	7	168				49	152	815	22	352	124	730
	570	710	1192	319	18	666	176	360				0	0	480	9	940	160	495
	568	691	1195	307	5	673	51	11				85	107	371	240	288	8	585
	1093	611	766	0	45	598	27	297				96	26	291	191	640	0	493
	969	708	799	194	0	198	29	9				64	36	503	112	410	44	542
	560	809	221	58	0	586	1	251				34	16	192	285	413	108	552
	324	396	411	146	0	881	122	157				16	0	265	159	451	88	880
	273	440	168	21	18	855	47	211				146	71	9	12	199	0	260
	71	712	373	0	47	855	1	111				60	107	3	62	336	344	745
	0	264	231	38	1	708	0	194				120	1	1	244	334	197	465
	0	523	188	2	0	520	0	183				160	0	122	744	408	0	544
	66	295	94	68	0	792	0	0				48	33	0	667	15	106	371
	7	517	188	138	0	961	0	209				1	0	1	683	279	19	317
	0	604	153	0	10	834	3	209				0	63	111	620	18	19	327
	0	182	125	166	0	484	0	6				106	81	61	250	300	242	321
	0	236	130	0	0	541	1	109				0	112	36	296	160	32	345
	88	264	181	171	11	604	0	0				108	164	0	626	264	21	250
	0	386	53	0	0	199	37	43				8	1	8	457	52	180	390
	0	0	45	2	0	753	5	0				12	97	0	473	331	0	336
	0	220	45	82	5	930	12	69				86	55	0	458	218	65	173
	0	3	204	0	0	715	0	110				95	2	3	465	351	141	270
	0	355	49	0	0	633	69	0				12	45	0	255	307	47	116
	43	313	285	45	0	752	0	0				79	124	7	291	338	106	168
	3	1	210	123	0	972	30	0				127	90	46	409	358	101	131
	0	0	122	0	32	1122	9	78				109	200	69	164	77	1	251
	0	277	244	0	6	873	15	77				206	40	141	398	281	681	630
	180	4	168	1	37	678	2	254				143	0	107	559	57	777	1052
	353	0	60	217	0	324	91	513				90	101	21	761	206	696	992
	271	0	24	144	47	407	4	550				130	95	7	798	287	839	672
	158	24	73	406	1	679	210	586				34	93	112	758	167	287	882
	137	1	54	407	0	567	139	269				102	0	177	413	184	337	1273
	7	105	157	107	11	696	86	651				101	131	392	644	262	729	1327
	42	0	366	43	0	310	161	420				38	86	843	585	217	648	571
	88	39	641	94	13	734	16	465				65	0	935	510	201	332	962
	156	0	1116	307	2	684	63	383				110	82	561	383	297	495	772
	0	0	935	0	0	836	166	498				39	109	422	432	15	639	916
	34	0	545	0	30	945	2	488				0	66	425	279	221	266	598
	7	120	317	90	0	814	99	1				145	64	379	396	104	821	481
	1	2	451	34	0	813	5	376				25	4	179	395	110	427	469
	1	0	318	129	25	149	6	211				103	43	352	427	146	1232	315
	0	0	276	2	0	443	45	305				27	73	286	415	73	596	326
	21	1	215	198	1	544	25	305				0	39	376	155	1	487	255
	30	16	260	17	2	673	0	206				0	60	669	441	28	541	226
	0	51	207	0	0	397	0	171				40	88	1072	579	206	62	62
	0	0	118	1	0	330	0	135				83	88	1131	377	212	341	215
	0	0	281	3	0	517	0	181				21	148	904	316	32	716	18
	0	0	350	140	0	623	45	95				91	64	571	565	253	796	186
	0	0	147	5	7	388	0	150				129	0	584	680	267	189	164
	0	40	106	157	0	691	0	103				0	0	1040	397	152	529	0
	0	23	259	0	0	502	1	149				14	3	1067	351	289	212	209
	0	0	172	84	29	473	26	59				73	130	783	282	1	394	66
	0	0	83	0	0	820	46	103				102	304	372	290	99	692	93
	2	0	106	157	0	552	0	0				41	354	666	359	35	1076	87
	0	0	67	0	12	285	0	157				22	471	660	122	6	722	129
	0	0	393	45	31	176	16	72				83	300	148	316	84	734	395
	2	34	937	14	1	109	0	134				152	443	409	280	326	861	416
	0	6	1095	0	52	190	78	119				131	459	454	666	370	647	352
	1	1	824	199	0	546	96	125				71	461	630	872	433	507	184
	7	0	505	0	31	650	84	85				106	377	574	684	667	839	55
	0	0	285	0	0	562	144	109				78	427	1196	608	1064	427	198
	0	0	558	5	0	301	63	56				58	448	1351	288	1090	712	253
	15	34	693	0	58	218	208	2				22	356	1006	590	815	789	24
	0	0	645	83	0	330	44	78				203	325	799	579	423	883	164
	0	0	889	0	10	301	2	0				0	266	670	245	208	550	192
	1	0	925	27	0	427	205	57				165	236	1281	543	869	482	205
	0	0	1025	0	0	9	171	113				142	456	1338	274	960	328	256
	0	1	909	83	55	98	149	219				1	392	1181	649	435	451	73
	2	29	602	15	1	3	106	0				125	514	1302	439	969	535	143
	2	9	465	20	0	0	71	239				130	514	1343	499	1301	784	291
	0	0	623	6	0	212	4	150				142	525	1390	543	810	553	255
	1	0	509	0	0	0	129	154				0	521	997	335	997	386	374
	0	1	266	0	0	345	11	23				1	467	1220	493	1470	661	250
	0	187	422	0	0	256	28	54				28	460	1457	80	933	591	286
	2	0	651	128	0	11	19	0				0	638	1357	460	777	299	134
	22	2	619	0	0	0	3	106				23	788	1570	8	351	631	192
	0	0	312	0	0	188	0	1				55	612	1614	394	396	448	81
	2	2	301	0	5	0	0	30				55	351	1082	104	620	490	78
	0	63	346	0	0	256	47	116				171	557	970	265	453	580	61
	0	93	32	0	0	143	0	3				32	623	1145	218	440	726	21
	0	0	329	167	0	0	6	1				0	589	723	277	1006	765	86
	0	0	259	19	0	0	0	10				0	358	1255	185	1515	858	23
	0	0	36	0	1	205	0	23				92	512	1023	241	1511	831	118
	0	0	80	40	0	0	3	6				42	510	1089	208	1018	884	12
	0	0	124	0	0	254	37	0				133	457	747	239	350	612	136
	0	65	0	267	10	0	1	5				158	460	837	210	181	830	405
	2	0	1	10	0	194	1	13				256	528	703	46	697	693	573
	1	102	93	0	47	359	124	0				303	520	763	123	382	822	368
	0	0	142	0	5	219	275	60				158	624	716	218	432	742	283
	26	0	188	0	0	134	200	61				438	420	600	351	428	722	357
	146	0	179	2	44	158	349	104				907	207	450	155	11	828	497
	418	15	214	29	1	99	132	0				734	143	632	168	524	1071	290
	181	7	96	0	2	193	100	7				438	283	931	0	183	861	504
	0	0	211	0	2	162	228	40				605	29	709	257	381	824	217
	133	0	8	0	0	218	174	7				526	262	689	233	11	1145	319
	87	0	234	42	70	302	119	29				268	118	566	26	341	706	272
	47	12	125	12	0	14	54	0				266	256	524	0	215	436	331
	151	0	35	119	2	385	185	0				399	114	620	13	178	569	247
	11	0	66	1	0	2	34	75				480	180	1042	60	1	640	300
	1	0	101	30	1	0	10	36				163	190	1378	0	293	452	259
	0	0	70	0	3	39	1	17				491	214	1289	109	248	312	207
	18	0	60	138	35	145	96	8				445	189	672	74	173	998	216
	24	29	14	47	0	0	76	24				285	144	431	76	16	768	143
	7	1	80	124	0	234	61	0				107	129	1483	0	233	821	262
	0	4	175	5	1	1	51	0				267	0	1536	0	158	790	100
	0	0	50	0	0	0	34	0				121	96	836	5	28	945	163
	0	0	182	0	0	0	3	0				319	0	1050	6	178	293	203
	1	0	97	0	0	188	26	0				219	129	659	45	131	765	191
	0	0	21	191	0	61	49	0				159	154	946	18	0	632	38
	0	0	16	2	18	55	0	0				199	130	1075	15	61	563	72
	0	1	155	2	0	228	104	92				0	128	380	10	189	626	41
	0	0	0	43	0	0	49	24				0	137	333	0	134	545	32
	0	0	147	0	5	0	49	119				16	0	762	1	66	654	13
	0	3	38	27	0	0	4	0				233	134	1371	78	85	520	38
	4	54	59	99	0	227	14	0				232	98	1300	2	206	776	19
	0	0	78	40	0	163	2	1				106	181	605	79	185	805	259
	0	11	113	0	8	186	83	15				4	186	832	1	258	581	249
	26	2	187	0	0	300	218	1				26	158	593	65	159	877	443
	25	0	211	0	51	89	237	225				5	196	990	214	84	794	853
	0	188	0	0	0	228	39	238				0	0	1118	348	213	1057	1176
	0	0	111	19	0	106	212	227				69	153	992	584	316	994	668
	0	78	75	0	9	255	76	194				161	225	1108	789	135	1054	620
	0	0	73	0	0	227	91	216				136	175	924	506	221	1175	645
	0	0	111	0	0	0	227	9				92	385	596	630	263	1473	823
	0	0	3	0	59	332	198	46				0	493	691	652	1	1422	603
	0	2	126	1	0	198	169	49				2	432	785	564	183	1293	717
	0	0	181	171	0	288	136	13				55	429	592	407	213	1265	1056
	0	0	144	0	4	268	42	74				30	499	802	305	166	1105	603
	0	8	238	0	0	22	81	209				84	331	1081	544	193	1012	434
	1	0	88	0	1	2	30	23				36	544	874	700	205	1126	282
	1	20	10	0	3	52	130	209				68	377	540	288	217	1070	334
	0	15	42	0	0	8	20	17				98	239	655	555	21	1045	85
	0	0	187	24	0	0	2	67				31	476	365	474	48	950	259
	0	24	196	35	0	24	3	11				108	375	290	595	64	1213	131
	1	0	144	1	0	37	32	0				4	424	273	624	125	1235	254
	0	0	225	0	15	0	2	21				101	411	293	119	86	1235	81
	0	46	29	47	0	0	0	10				82	565	316	438	0	1052	258
	0	0	118	0	0	231	0	10				5	506	379	78	169	993	17
	0	0	93	231	0	0	11	0				104	506	193	465	149	1067	218
	0	0	1	0	0	120	2	61				0	595	408	286	0	1343	40
	0	0	176	0	0	97	3	0				17	419	434	272	73	1200	191
	0	0	61	0	0	0	0	1				7	638	129	312	86	1151	173
	0	0	180	0	2	0	3	2				24	530	378	314	19	1169	193
	0	0	1	1	0	24	92	0				43	314	275	337	220	1267	108
	0	1	126	5	0	88	15	101				1	69	666	194	3	1288	182
	0	0	3	0	5	0	6	0				24	231	371	292	37	930	267
	24	0	23	0	1	86	146	95				72	529	526	248	211	698	130
	324	1	86	88	0	186	179	0				59	564	698	402	285	669	66
	448	0	176	0	52	60	0	17				85	562	417	268	605	958	227
	392	3	50	0	1	320	167	17				127	359	470	35	1104	588	63
	233	0	275	0	8	121	123	9				35	228	217	0	1017	633	236
	84	0	14	89	13	290	112	130				176	290	369	178	278	768	39
	2	0	219	0	9	281	203	10				15	352	182	44	642	848	223
	139	2	7	159	1	0	168	74				60	220	330	1	905	904	205
	27	0	158	0	35	298	0	12				25	400	101	0	885	585	178
	0	9	0	174	0	171	208	3				136	198	179	183	900	806	145
	0	413	61	0	44	180	15	0				44	327	151	131	1094	787	122
	0	146	78	0	0	283	188	4				141	345	100	0	786	460	70
	0	77	47	0	0	1	85	6				75	248	48	107	807	1017	130
	6	254	137	0	13	0	0	0				63	177	52	0	826	995	11
	0	559	151	1	2	70	12	2				0	184	8	163	329	673	194
	0	317	1	85	0	26	96	0				78	72	0	7	417	560	11
	0	373	140	0	0	0	2	0				40	18	148	64	400	741	139
	0	24	79	0	0	125	3	0				5	175	163	0	502	363	86
	0	50	49	0	0	37	1	9				96	84	0	87	162	457	86
	0	51	137	0	0	0	53	21				0	24	31	54	337	510	97
	0	299	223	0	9	87	0	0				0	132	1	119	260	555	47
	0	304	134	4	0	33	0	0				0	92	25	108	345	445	46
	0	81	131	13	0	0	0	0				141	72	3	77	82	539	173
	0	0	25	0	0	188	25	0				88	112	19	10	73	454	0
	0	0	137	0	0	5	33	0				58	96	56	23	186	317	91
	0	155	94	0	5	0	0	80				112	125	88	7	314	327	0
	0	0	196	1	0	0	0	11				165	27	5	4	240	558	44
	0	0	68	0	0	65	0	18				138	56	0	32	195	259	0
	0	3	96	63	10	2	22	0				137	79	7	17	291	310	79
	58	0	19	3	11	1	29	0				48	279	1	11	177	372	39
	0	1	57	0	5	42	114	0				467	443	21	2	257	402	156
	0	59	101	0	59	178	116	1				863	476	9	0	133	572	225
	0	0	188	0	3	121	135	18				533	469	159	0	16	301	210
	0	0	191	6	0	181	146	97				611	424	678	31	134	569	28
	5	0	187	0	44	0	67	48				1052	160	643	0	55	523	203
	0	0	201	37	0	294	188	49				922	114	663	0	0	463	217
	0	41	209	0	0	132	59	0				497	13	1226	28	11	223	253
	0	82	141	0	48	336	145	8				1018	407	411	172	156	238	207
	0	0	207	0	0	254	246	73				600	494	1135	30	184	369	274
	0	0	117	0	3	305	231	25				796	362	514	0	4	122	248
	0	0	58	7	0	345	175	19				542	346	1027	37	117	73	162
	0	0	188	0	0	0	145	1				627	617	447	0	0	83	280
	0	0	3	0	10	146	80	92				435	619	1167	122	143	241	96
	2	2	135	0	3	44	87	113				190	560	1161	13	44	96	197
	0	0	141	0	0	8	66	71				128	496	469	1	284	78	134
	0	0	101	0	0	0	95	117				184	397	457	0	46	178	179
	0	0	102	0	0	38	0	0				241	320	468	0	24	148	155
	0	0	155	34	0	204	3	0				326	420	1051	0	0	159	63
	0	4	38	0	11	1	13	12				79	303	960	1	29	48	153
	0	0	91	0	2	289	0	2				193	335	554	1	81	0	71
	0	0	68	0	3	0	0	0				55	432	350	4	47	87	62
	0	0	71	0	0	258	0	32				111	471	692	0	97	0	92
	0	0	52	1	0	50	6	7				2	552	718	0	2	97	11
	0	0	161	41	0	0	41	0				0	572	365	0	108	0	36
