# Supplementary material for: Stimulus salience determines defensive behaviors elicited by aversively conditioned serial compound auditory stimuli
Source: eLife journal article supplement (doi:10.7554/elife.53803), 2020-03-27
Supplement: supp [file elife-53803-supp-v1.zip › elife_poa_e53803_Figure_1_figure_supplement_2.pdf]

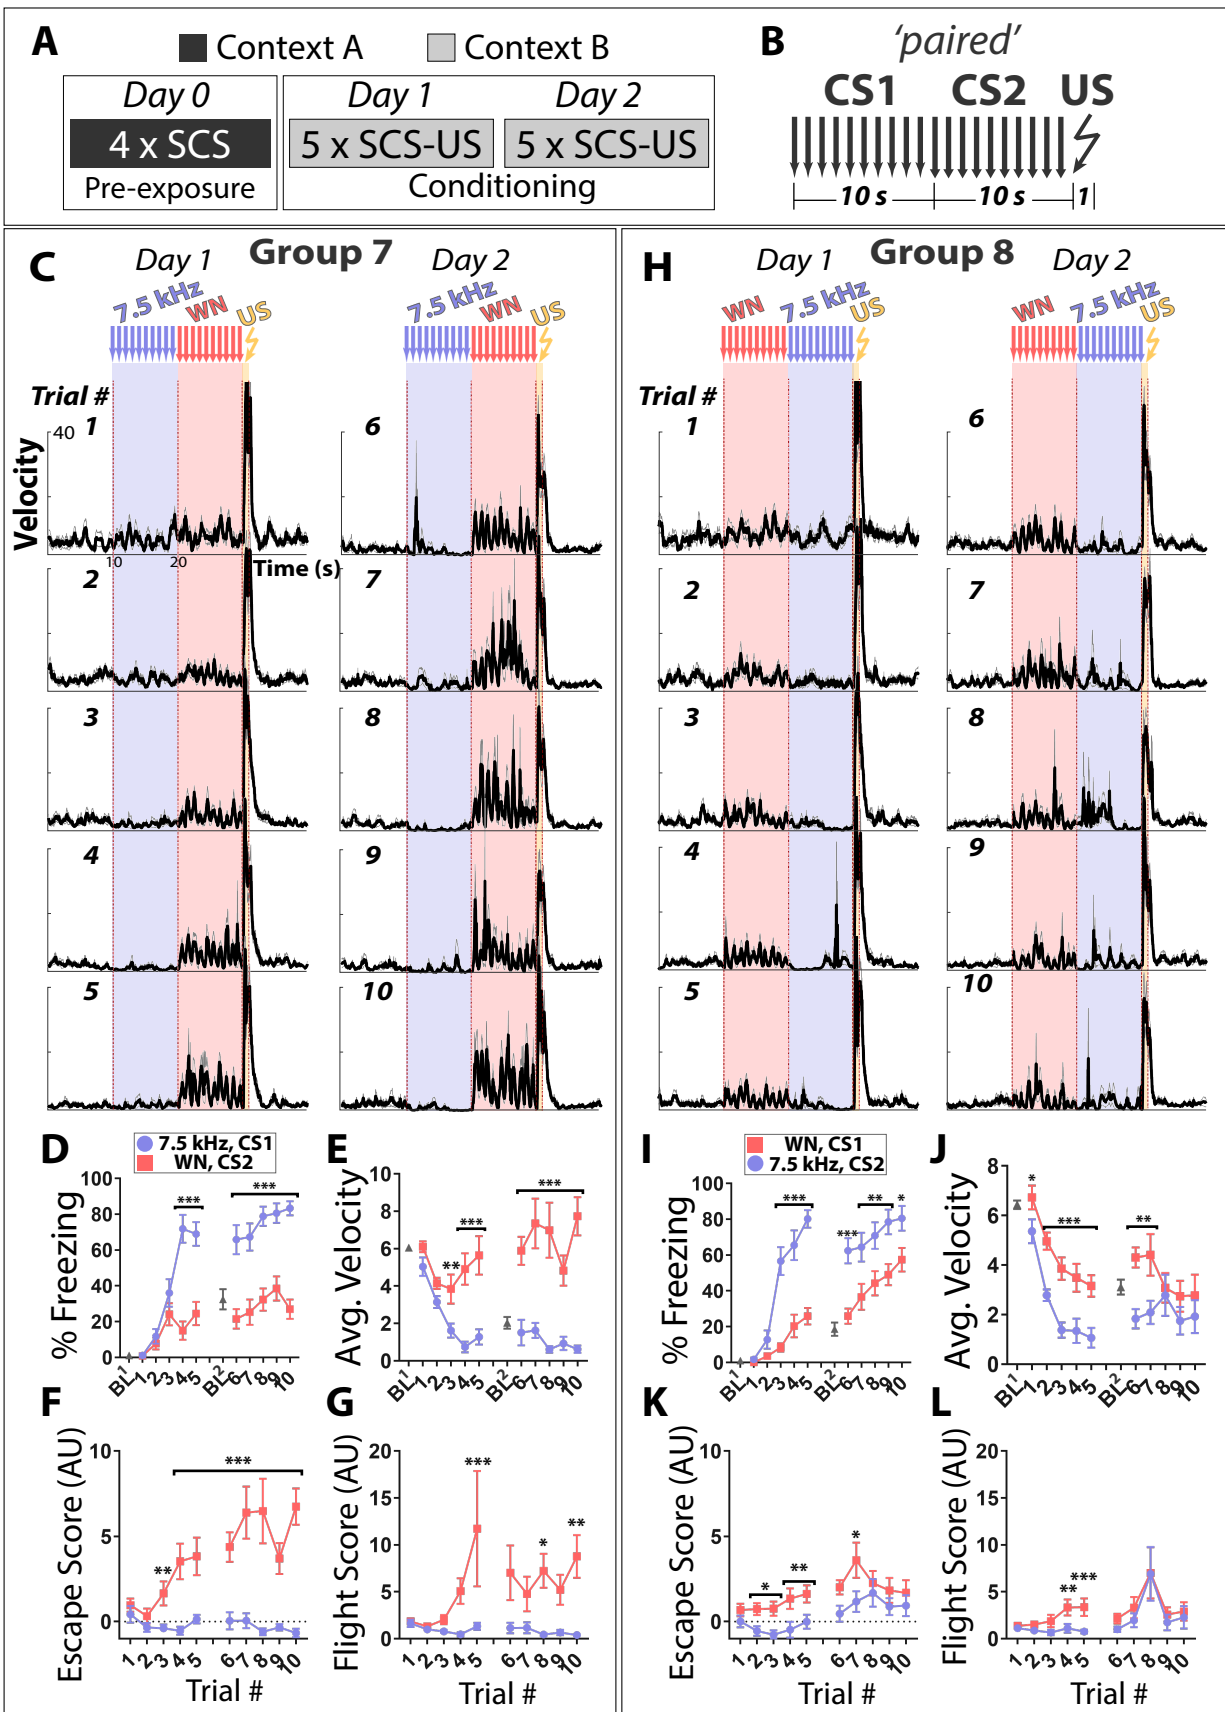

**Figure 1-figure supplement 2**

Reversing order of tone and white noise presentation during SCS conditioning does not reverse the behaviors these stimuli elicit in C57Bl6/J mice
