# Supplementary material for: Stimulus salience determines defensive behaviors elicited by aversively conditioned serial compound auditory stimuli
Source: eLife journal article supplement (doi:10.7554/elife.53803), 2020-03-27
Supplement: supp [file elife-53803-supp-v1.zip › elife_poa_e53803_Figure_1_figure_supplement_2_source_data_1.xlsx]

## Sheet: Measurements for plots
Figure 1–figure supplement 2 Source Data 1
	Mouse 1	Mouse 2	Mouse 3	Mouse 4	Mouse 5	Mouse 6	Mouse 7	Mouse 8	Mouse 9	Mouse 10	Mouse 11	Mouse 12
Group7_Freezing
BL1	0.851852	0	0	1.37037	0.407407	3.2037	0	5.85185	0	0	0	1.42593
BL2	38.6296	27.9815	42.3148	23.2407	17.4815	8.01852	48	61.5	19.6296	69.0741	17.0185	17.0185
Group7_Freezing_CS1
Trial 1	0	0	0	13.6667	0	0	0	0	0	0	0	0
Trial 2	5	0	0	53	10.3333	13.6667	7.33333	14.6667	16.3333	12	0	9.33333
Trial 3	12.3333	7.33333	39	71.6667	60.6667	16.6667	72	25.3333	47.3333	65.3333	0	15
Trial 4	94.3333	89.6667	76.3333	100	76.3333	56	92.3333	72.3333	47.6667	100	43.6667	13.6667
Trial 5	44.3333	91	95.6667	93	66.3333	63.3333	77.6667	72.3333	36.3333	100	50	38
Trial 6	62	90.3333	78.6667	95	41.6667	52	90	92.6667	51.3333	82.3333	0	54
Trial 7	77.3333	100	22.6667	57.6667	72.6667	71.3333	95.6667	92.6667	17.3333	71.6667	76.6667	52
Trial 8	83.6667	78.3333	96	96.3333	63.3333	60.3333	97.3333	92.3333	55.3333	98.6667	45.3333	79.6667
Trial 9	98	87	87.3333	95.3333	86.6667	85	77	99.3333	57.6667	75.6667	86.3333	32.3333
Trial 10	61.3333	80.6667	95.6667	95.3333	66.3333	88.3333	88.6667	71.6667	96.3333	100	65	90.6667
Group7_Freezing_CS2
Trial 1	0	0	0	0	5.33333	5	0	0	0	0	0	0
Trial 2	7.33333	0	5	7	15	7.66667	0	40.6667	0	10.6667	0	0
Trial 3	37.6667	16.3333	20.6667	50.3333	5.33333	10.6667	20	50	6	65	0	7.66667
Trial 4	20.3333	7.66667	13.6667	13.3333	0	23.3333	0	20	0	65	11.6667	4.66667
Trial 5	5.66667	23	42.3333	12.3333	15.6667	5.33333	14	54.3333	32	75	0	15
Trial 6	15.6667	50	1.66667	5.66667	5	36	35	49.3333	10	39.3333	0	11.3333
Trial 7	7	28.3333	24.3333	25	8.33333	11.3333	29.6667	76	14.3333	72	2.33333	5
Trial 8	56	56.6667	28.3333	38.6667	0	6.33333	47.6667	60	2.33333	44.3333	26	21.6667
Trial 9	37.6667	72.6667	32	17	6	35	71	50.3333	35.6667	69.6667	7.33333	28
Trial 10	13	34.6667	25	38.6667	2.66667	39.3333	32.3333	41.3333	24	64.6667	0	8
Group8_Freezing
BL1	0.611111	0.888889	0	3.05556	0.648148	2.12963	0.277778	1.01852	0	0.722222	0.5	2.94444
BL2	29.537	16.9259	5.5	30.8148	9.59259	44.5741	33.8333	12.5	11.0741	9.33333	5.33333	14.0556
Group8_Freezing_CS2
Trial 1	0	3.33333	6.66667	0	0	10.3333	0	0	0	0	0	0
Trial 2	26.3333	24.3333	8	0	3.66667	61.3333	0	0	6.33333	9	5	9.33333
Trial 3	68.6667	52	58	83	76.3333	58.3333	13.3333	4.33333	54.6667	77	94.6667	39.3333
Trial 4	89.6667	95	20	82	100	89	33.6667	45	28	71.3333	85	47.3333
Trial 5	95.6667	92.3333	95.3333	87.6667	100	72.3333	50.6667	87	77.3333	64	51.3333	88.6667
Trial 6	50.3333	88.6667	44.6667	69.3333	51.6667	73	5.66667	50.3333	76.3333	83.6667	60	95.3333
Trial 7	15.3333	81	51.6667	54.3333	87	48.6667	79	87.3333	19.3333	97.6667	57.3333	94.6667
Trial 8	21.6667	72.3333	41.3333	51	97.3333	90.6667	47.3333	76.6667	91.3333	95	65.6667	100
Trial 9	37.6667	69	47	77.3333	97.6667	100	43.3333	84	100	99.3333	99.6667	87
Trial 10	60	96.3333	45.3333	99.6667	100	100	35.6667	92.3333	100	100	76	61.3333
Group8_Freezing_CS1
Trial 1	0	0	0	0	0	0	0	0	0	0	0	0
Trial 2	15	0	1	0	9	5	0	5	0	7	0	0
Trial 3	0	5.66667	11.6667	0	8.33333	23.3333	0	18.3333	0	7.33333	17.3333	8.33333
Trial 4	33.6667	41.6667	0	4	70	42.6667	18.3333	6.66667	0	11.3333	7	9
Trial 5	11	31.3333	11.6667	24.3333	60.3333	39.6667	13	27	9	44.6667	12.6667	25.6667
Trial 6	6	25	17	13.3333	32.6667	48.3333	34.6667	13.3333	30	54.3333	13.6667	22
Trial 7	76.3333	46.6667	11.6667	32.3333	23.3333	82.6667	8.66667	15.3333	10	42	38.3333	52.3333
Trial 8	56.6667	50.6667	6.66667	66	59.6667	65	80.3333	25.6667	38.6667	22.3333	9.33333	50
Trial 9	62	66	33	47.3333	27.3333	81	26	34	36	74	30.6667	71
Trial 10	69.6667	47.3333	14.6667	86	64	84.6667	22	44	61	82	51	63
Group7_Velocity
BL1	5.68719	6.8036	5.98247	5.39368	6.71765	6.16764	5.6854	5.46331	6.02442	6.56124	6.41623	5.70637
BL2	1.45275	2.5036	1.11023	3.59382	2.08158	4.32206	1.0207	1.27452	2.20739	0.722147	1.60925	2.50782
Group7_Velocity_CS1
Trial 1	3.24745	5.12167	5.39055	2.58875	2.66307	6.8014	5.39878	6.61718	4.98777	8.27068	5.16533	4.16062
Trial 2	4.10467	3.05977	4.18652	0.77172	2.76256	3.52104	3.18694	4.94272	1.84948	3.35273	3.5279	2.49957
Trial 3	2.81173	4.17348	1.63678	0.602727	0.530377	2.6941	0.397072	0.698835	1.22501	0.624873	0.705658	3.32785
Trial 4	0.148408	0.15103	0.211552	0.0443028	1.01842	2.42523	0.12014	0.395284	0.254804	0.0583836	1.03057	3.06311
Trial 5	1.50379	0.18439	0.144157	0.131848	1.45392	0.448982	0.602077	1.24498	4.89447	0.149653	1.83398	2.75547
Trial 6	0.809221	0.313264	0.336103	0.196537	0.391656	3.26969	0.208025	0.220476	3.04246	0.457379	8.1954	0.720716
Trial 7	1.01175	0.123166	1.9723	3.48656	1.23894	1.31171	0.169	0.281765	4.23314	2.5489	0.383682	2.77151
Trial 8	0.354111	0.834424	0.127646	0.0978672	1.046	2.14721	0.221939	0.287958	1.21463	0.107426	0.625674	0.297875
Trial 9	0.12417	0.417907	0.538586	0.0917457	0.321078	0.432146	0.46315	0.164802	3.51568	1.54188	0.202597	3.37477
Trial 10	2.08895	0.835579	0.130876	0.167513	0.429103	0.261767	0.29927	1.34174	0.164341	0.0518572	1.57522	0.126204
Group7_Velocity_CS2
Trial 1	5.64829	6.24856	6.55293	7.31287	6.96334	5.38835	5.47281	5.32866	6.90012	7.22839	3.83213	6.37355
Trial 2	4.81847	4.52651	3.83776	3.83217	2.51663	5.793	4.89581	2.12966	4.41772	3.60452	4.85022	4.55123
Trial 3	0.990266	4.8552	1.18606	0.925383	9.66369	5.61295	4.16093	2.46051	5.86796	0.877234	3.89364	5.63241
Trial 4	5.5877	0.927805	3.07109	5.08637	9.32068	6.0704	3.84133	2.21142	4.83188	0.806215	7.90576	9.27774
Trial 5	4.33221	5.0947	1.78942	4.28162	12.4388	10.3474	4.60907	2.31866	5.33428	0.595392	7.83546	8.73648
Trial 6	3.62897	2.58344	4.92924	11.1755	6.19772	8.72966	3.66897	3.0915	7.20468	5.05962	6.20609	8.17733
Trial 7	7.85027	4.33628	7.02696	7.31384	13.2985	11.352	3.09725	0.678611	7.2219	0.368345	12.7364	12.9255
Trial 8	1.28853	2.0682	7.88502	6.25764	15.0115	15.4662	2.91476	0.757062	10.5487	3.11443	8.76278	9.76087
Trial 9	2.82942	0.997421	7.65794	6.79321	3.64543	8.93628	1.25275	3.02953	6.42599	2.10109	6.59279	7.67846
Trial 10	9.14686	7.37734	5.81737	6.07591	10.6434	8.25491	4.52386	4.83531	12.9351	0.714264	11.7618	10.7172
Group8_Velocity
BL1	6.71205	7.16771	6.25559	6.18371	5.90228	6.40376	6.11967	7.36417	5.35111	7.10483	6.02415	6.63065
BL2	1.73603	4.26851	3.43726	2.68251	3.86768	1.67698	2.16606	4.3717	1.85193	4.2599	3.35999	3.62355
Group8_Velocity_CS2
Trial 1	7.12961	6.08229	4.22142	4.99678	3.7908	5.66373	6.96858	5.00236	4.72272	7.30996	1.65152	6.80445
Trial 2	3.05696	2.84203	2.51417	4.26091	3.52059	1.65961	3.17931	1.60447	2.78122	1.6787	3.22324	3.10252
Trial 3	2.74966	0.655368	0.730007	0.185131	1.50983	2.12157	2.93046	1.73504	0.640376	0.250651	0.221387	2.80023
Trial 4	0.148994	0.0910094	1.32568	0.192797	0.048385	0.219102	5.85455	2.37353	2.16801	0.258275	1.04324	2.40712
Trial 5	0.407026	0.209867	0.0649386	0.124723	0.0445783	3.43455	2.86998	0.527062	0.289137	0.626622	3.65264	0.481941
Trial 6	0.809221	0.313264	0.336103	0.196537	0.391656	3.26969	0.208025	0.220476	3.04246	0.457379	8.1954	0.720716
Trial 7	1.01175	0.123166	1.9723	3.48656	1.23894	1.31171	0.169	0.281765	4.23314	2.5489	0.383682	2.77151
Trial 8	0.354111	0.834424	0.127646	0.0978672	1.046	2.14721	0.221939	0.287958	1.21463	0.107426	0.625674	0.297875
Trial 9	0.12417	0.417907	0.538586	0.0917457	0.321078	0.432146	0.46315	0.164802	3.51568	1.54188	0.202597	3.37477
Trial 10	2.08895	0.835579	0.130876	0.167513	0.429103	0.261767	0.29927	1.34174	0.164341	0.0518572	1.57522	0.126204
Group8_Velocity_CS1
Trial 1	7.95944	5.04591	6.07948	6.79183	3.41895	5.99768	7.42442	9.26024	7.74048	8.74001	5.27338	7.03519
Trial 2	4.98557	3.62159	7.09616	4.26064	4.52193	5.58004	5.26152	6.63004	3.05863	4.10825	5.8834	4.55635
Trial 3	6.74475	3.26606	1.57132	2.87335	4.8958	2.21393	1.95953	4.10354	5.20225	3.48415	4.63021	5.35809
Trial 4	1.65536	2.61056	5.56413	3.41091	1.45599	2.95963	2.89562	4.17352	8.37105	1.68962	4.28905	2.77556
Trial 5	3.66532	3.14983	3.64174	1.18398	1.52926	3.66876	4.41137	3.80112	1.37782	1.12129	5.20108	5.13172
Trial 6	3.62897	2.58344	4.92924	11.1755	6.19772	8.72966	3.66897	3.0915	7.20468	5.05962	6.20609	8.17733
Trial 7	7.85027	4.33628	7.02696	7.31384	13.2985	11.352	3.09725	0.678611	7.2219	0.368345	12.7364	12.9255
Trial 8	1.28853	2.0682	7.88502	6.25764	15.0115	15.4662	2.91476	0.757062	10.5487	3.11443	8.76278	9.76087
Trial 9	2.82942	0.997421	7.65794	6.79321	3.64543	8.93628	1.25275	3.02953	6.42599	2.10109	6.59279	7.67846
Trial 10	9.14686	7.37734	5.81737	6.07591	10.6434	8.25491	4.52386	4.83531	12.9351	0.714264	11.7618	10.7172
Group7_EscapeScore
Group7_EscapeScore_CS1
Trial 1	0.02	3.03	-2.21	-0.94	-0.82	1.3	1.06	2.59	-0.28	2.8	-0.77	-0.65
Trial 2	0.45	-1.62	-0.51	-1.24	-1.43	1.31	0.58	0.35	-0.69	-0.71	0.25	-0.84
Trial 3	-0.14	-0.55	-0.52	0.06	-0.63	0.02	-0.39	-0.05	-1.63	0.06	-1.82	0.93
Trial 4	-0.17	-0.59	-0.66	-0.08	-1.75	-0.99	-0.07	-0.44	-2.18	-0.13	-0.19	0.85
Trial 5	0.23	-0.06	-0.09	0.03	-0.51	-1.16	-0.12	-0.3	2.1	-0.04	1.55	0.11
Trial 6	-1.35	-0.95	-0.11	-0.2	-0.43	-1.45	-0.37	-0.03	0.99	0.04	5.19	-0.73
Trial 7	-0.62	-0.41	2.47	1.68	-1.88	-2.42	-0.24	-0.66	1.68	1.66	-0.38	-0.19
Trial 8	-0.42	-2.19	-0.1	-0.17	-0.29	-0.63	-0.5	-1.54	0.22	-0.1	-0.38	-1.01
Trial 9	-0.2	-0.15	-0.42	-0.3	-1.34	-1.01	-0.08	-1.31	0.7	0.3	-0.55	0.38
Trial 10	-2.26	-1.42	-2.35	-0.06	-0.2	-0.4	-0.09	-0.05	-0.12	-0.02	-0.75	-0.3
Group7_EscapeScore_CS2
Trial 1	1.22	2.78	-0.13	-0.2	0.11	0.93	1.08	1.25	2.51	3.16	-1.17	0.07
Trial 2	0.5	-1.31	0.71	-0.01	-1.86	4.16	1.36	-0.59	0.19	-0.34	1.01	0.12
Trial 3	-0.51	0.34	-1.04	0.12	6.42	5.05	0.93	1.55	1.47	0.05	0.55	4.91
Trial 4	5.08	0.07	0.2	2.33	8.12	4.75	0.88	0.06	3.4	-0.02	6.77	10.72
Trial 5	2	2.6	0.39	2.81	12.68	7.68	2.02	-0.28	4.19	0.03	7.6	4.22
Trial 6	3.08	0.81	5.34	10.99	4.89	2.55	0.48	1.9	4.7	4.35	8.01	5.36
Trial 7	6.48	2.08	7.68	5.82	10.28	9.65	0.33	-0.57	5.82	0.04	15.68	13.37
Trial 8	-0.24	-2.2	7.46	5.88	15.53	16.57	1.02	-1.39	12.76	3.04	10.89	8.44
Trial 9	1.67	0.02	9.79	5.66	2.46	6.25	0.01	1.77	3.76	0.53	5.42	7.07
Trial 10	5.04	4.11	6.52	5.8	9.49	5.83	3.58	5.4	10.39	0.14	12.13	12.46
Group8_EscapeScore
Group8_EscapeScore_CS2
Trial 1	-0.51	0.39	-1.96	2.71	0.25	1.01	0.05	-0.18	-0.35	-0.19	-1.66	0.61
Trial 2	0.52	-0.98	-0.47	-0.03	-1.43	-2.43	1.05	-1.51	-0.27	-0.32	-0.93	0.21
Trial 3	0.97	-0.85	-1.46	-1.18	-1.06	-0.43	-0.87	-0.67	-2.39	-0.93	-0.99	0.66
Trial 4	-0.15	-1.11	-0.16	-2.84	-1.39	-0.12	3.38	0.69	-2.39	-1.53	-0.08	-0.01
Trial 5	-0.21	-1.29	-0.79	-1.86	-0.01	3.89	0.54	-0.7	-0.36	0.13	0.77	-0.19
Trial 6	-0.74	-0.41	0.67	1.43	1.17	1.19	3.37	2.72	-1.66	-1.99	0.19	-0.41
Trial 7	1.89	1.09	3.65	1.82	-2.34	5.64	-0.33	0.34	1.87	-0.68	1.3	-0.12
Trial 8	5.18	0.85	6.16	0.58	-2.47	3.55	5.97	0.27	-0.16	-0.12	0.7	-0.32
Trial 9	2.67	0.2	3.33	3.87	-0.32	-0.13	2.76	-0.28	-0.35	-0.4	-0.48	-0.23
Trial 10	2	-0.74	0.69	0	-1.02	-0.2	6.95	0.74	-0.22	-0.14	2.18	1.04
Group8_EscapeScore_CS1
Trial 1	-0.36	1.4	-1.1	2.4	0.55	2.68	-0.8	2.44	0.55	0.17	0.17	0.06
Trial 2	0.74	-0.09	1.3	-0.12	-0.93	-0.57	1.62	0.62	-0.25	1.67	1.67	3.22
Trial 3	2.46	0.76	-0.8	0.13	0.58	-0.47	-1.36	0.14	0.35	1.58	3.53	2.25
Trial 4	0.37	1.15	1.76	0.87	-1.01	1.76	0.59	1.41	6.73	-0.64	3.34	-0.17
Trial 5	1.59	2.04	0.84	-1.25	0.2	2.87	2.32	1.49	0.41	0.09	3.92	4.96
Trial 6	3.03	2.01	3.37	3.04	1.91	2.18	0.36	3.57	-1.2	0.39	3.22	2.22
Trial 7	0	2.97	9.63	4.36	2.28	-0.78	7.7	8.48	5.11	-0.17	3.41	0.21
Trial 8	1.95	4.2	3.15	0.03	-2.1	1.27	1.36	6.08	0.17	6.17	3.79	1.02
Trial 9	-0.94	1.48	3.21	3.85	7.66	-0.02	4.09	2.55	0.02	-0.25	0.35	-0.04
Trial 10	-1.2	1.3	7.26	0.05	1.37	-0.11	4.1	4.8	-0.04	-0.06	3.22	-0.45
Group7_FlightScore
Group7_FlightScore_CS1
Trial 1	1.00073	2.02845	0.87892	0.700056	0.407247	2.15611	2.76348	1.89536	0.719021	5.44967	0.785323	0.938029
Trial 2	1.69891	0.943841	1.93005	0.168754	0.547268	1.92918	0.900626	1.17661	0.462161	0.652192	0.947787	0.613851
Trial 3	0.976396	0.749744	0.431441	1.53573	0.304253	1.74153	0.165472	1.31432	0.297198	0.656026	0.147684	1.0465
Trial 4	0.282782	0.136867	0.144545	0.128233	0.342225	0.634917	0.272642	0.135018	0.07215	0.128049	0.479346	2.79172
Trial 5	1.76367	0.500309	0.322535	2.40464	0.595795	0.170148	0.430098	0.634784	4.32783	0.690954	2.96847	1.06171
Trial 6	0.282659	0.122985	0.267629	0.221176	0.323458	0.647156	0.165836	0.424842	0.995114	3.40178	6.57069	0.261579
Trial 7	0.499757	0.0885	1.47001	1.06418	0.323978	0.246683	0.127391	0.110061	1.03073	7.4603	0.615158	0.848384
Trial 8	0.25628	0.165375	0.183505	0.096312	0.838074	0.623567	0.140205	0.058781	1.82108	0.243472	0.700528	0.102768
Trial 9	0.15022	0.348181	0.437989	0.27231	0.14801	0.16234	0.345569	0.053315	1.57185	3.51428	0.219104	0.7231
Trial 10	0.571439	0.152269	0.027162	0.525209	0.499939	0.181139	0.369883	1.2335	0.315405	0.189529	0.461481	0.136701
Group7_FlightScore_CS2
Trial 1	1.74057	2.47476	1.06844	1.97756	1.06486	1.70815	2.80137	1.52629	0.9947	4.76289	0.582626	1.43694
Trial 2	1.99435	1.39628	1.76926	0.837991	0.498549	3.17399	1.38355	0.506962	1.10393	0.701173	1.30303	1.1177
Trial 3	0.343878	0.872212	0.312636	2.35785	5.54361	3.62834	1.73398	4.62754	1.42362	0.920968	0.814881	1.77121
Trial 4	11.647	0.840797	2.09835	14.7223	4.17801	1.58921	8.71738	0.75536	1.36818	1.76823	4.76568	8.45575
Trial 5	5.08089	13.8236	4.00363	78.088	6.39346	3.92129	3.29252	1.18223	4.71672	2.74896	14.018	3.36625
Trial 6	1.26759	1.01424	4.70691	12.5765	5.11854	1.72782	2.92489	5.9571	3.35648	37.6312	4.99949	2.96791
Trial 7	3.87768	3.11578	3.73467	2.23235	4.57487	3.13487	2.3347	0.265073	2.48032	1.0781	24.4204	5.9566
Trial 8	0.932541	0.409898	13.5389	6.15823	14.1732	6.49151	1.84133	0.154539	19.2198	7.05861	12.2515	4.52229
Trial 9	3.42302	0.831006	10.2382	20.1629	1.68047	3.357	0.934713	0.980083	3.87305	4.78882	8.4769	3.69557
Trial 10	2.50215	1.34439	3.30687	19.05	13.4004	5.71228	5.59126	5.44524	26.714	2.6105	5.44576	14.119
Group8_FlightScore
Group8_FlightScore_CS2
Trial 1	1.21024	1.69934	0.702218	1.41346	1.00041	1.25829	1.15219	0.89507	0.800148	1.74228	0.283744	1.31951
Trial 2	1.39482	0.65662	0.81952	1.21071	0.860776	0.3161	1.19795	0.264157	1.09592	0.772529	0.676274	1.32021
Trial 3	3.64576	0.247757	0.213365	0.084642	0.62723	0.692962	0.690574	0.574467	0.179102	0.08613	0.089574	0.784049
Trial 4	0.581562	0.043694	0.715363	0.057261	0.022353	0.523838	3.4723	5.28477	0.627325	0.160517	1.21133	0.590434
Trial 5	0.817327	0.05323	0.031121	0.032848	0.304838	1.91849	1.59995	0.246108	0.454484	1.92053	1.02645	0.697469
Trial 6	0.443505	0.135065	0.719888	1.59382	1.53064	1.15318	1.84536	3.54876	0.157814	0.088929	0.752463	0.04445
Trial 7	8.97693	0.733287	3.22378	2.25387	0.1246	3.17594	0.296724	0.60999	3.11024	0.051516	0.932745	0.090541
Trial 8	33.7387	0.694502	5.64354	9.40567	0.057403	12.9359	14.594	4.25839	0.12661	0.518297	0.891646	0.05546
Trial 9	2.08454	1.13606	2.0642	3.74319	0.094665	0.151318	10.2754	0.514643	0.111202	0.186888	0.05128	0.439703
Trial 10	1.37636	0.027021	0.914232	0.814023	0.01347	0.075509	13.6588	0.466646	0.44622	0.16571	7.66186	1.61601
Group8_FlightScore_CS1
Trial 1	1.3511	1.40978	1.0113	1.92124	0.902274	1.33248	1.22756	1.65693	1.31143	2.08313	0.906006	1.36426
Trial 2	2.2748	0.83673	2.31307	1.21063	1.1056	1.06281	1.98251	1.09156	1.20523	1.89059	1.23441	1.93885
Trial 3	8.94281	1.23471	0.459264	1.3137	2.03387	0.723129	0.461771	1.35867	1.45498	1.19724	1.87341	1.50024
Trial 4	6.46131	1.25335	3.00252	1.01304	0.672631	7.07601	0.983888	9.29253	3.42221	1.0501	4.98013	0.680807
Trial 5	7.36013	0.798906	1.74524	0.311826	10.4574	0.981122	2.45924	1.77491	2.16575	3.43665	1.46158	7.42667
Trial 6	2.5114	1.50962	1.27274	3.90362	0.926989	1.12137	1.50421	6.98043	0.364063	0.818141	2.64798	2.09611
Trial 7	1.02289	1.03443	9.16348	3.39788	0.849994	0.252491	4.36366	3.80388	12.8179	0.573755	1.31116	1.17991
Trial 8	11.404	1.94033	5.72613	1.31147	0.269934	4.84433	3.26039	29.6389	0.671877	22.0167	1.76263	1.33456
Trial 9	0.366309	1.42074	2.01831	3.99496	7.45741	0.789933	7.92127	3.0682	1.16617	0.751639	1.08069	0.95047
Trial 10	0.176253	0.854088	3.59358	3.57673	1.04377	0.448922	9.88308	1.92969	1.24558	1.31253	9.87052	0.965119

## Sheet: Velocity traces_G7
G7_Trial1																G7_Trial2																G7_Trial3																G7_Trial4
	Mouse 1	Mouse 2	Mouse 3	Mouse 4	Mouse 5	Mouse 6	Mouse 7	Mouse 8	Mouse 9	Mouse 10	Mouse 11	Mouse 12					Mouse 1	Mouse 2	Mouse 3	Mouse 4	Mouse 5	Mouse 6	Mouse 7	Mouse 8	Mouse 9	Mouse 10	Mouse 11	Mouse 12					Mouse 1	Mouse 2	Mouse 3	Mouse 4	Mouse 5	Mouse 6	Mouse 7	Mouse 8	Mouse 9	Mouse 10	Mouse 11	Mouse 12					Mouse 1
	0.42649	7.02999	20.2555	2.81716	1.22868	1.44005	22.1641	0.806885	0.50046	10.0602	1.32795	0.925904					10.476	2.7944	1.4583	7.06362	6.11401	0.79113	6.29286	18.3787	7.73106	3.76529	7.00046	8.66123					0.545911	2.54623	1.85084	0.445524	1.58121	0.106336	9.23835	0.46914	0.166951	9.29244	8.02012	0.536332					0.0530437
	0.268536	4.7745	21.4422	4.29492	1.27334	0.1799	19.4059	0.270106	0.577246	8.22674	0.702747	0.913239					8.18954	3.37359	1.56792	6.89478	3.7709	0.706935	4.6401	20.2667	7.30874	3.1685	7.76239	6.91778					0.190419	2.55677	1.47155	0.431685	1.90588	0.328556	7.21784	0.331042	0.02533	7.57308	6.00778	0.650322					0.0768414
	0.31704	5.31327	20.7468	10.8079	0.980958	0.334041	18.7707	0.803786	0.505987	7.07469	1.90931	1.0012					10.5055	2.54567	1.16251	7.98282	0.740789	0.829538	4.41627	22.4646	7.52459	4.04621	10.8293	5.45977					0.612395	4.3236	1.63037	0.408254	1.46463	0.623108	5.57752	0.366662	0.0858641	7.04503	5.33385	1.19481					0.0921232
	0.724896	4.04018	19.4339	9.12527	1.43922	0.930694	17.4446	2.65606	0.542622	6.91532	4.32976	1.31273					11.7762	2.68589	0.850674	10.4239	1.29805	1.56963	4.26325	23.1783	9.57717	4.82878	11.962	4.33335					0.251034	4.92459	1.40523	0.44345	0.782033	0.836367	6.11299	0.597664	0.358844	5.15394	5.05203	1.09131					0.0354971
	0.492573	3.19385	17.9962	10.0159	1.59695	1.38725	18.2792	0.408224	1.66644	5.41481	6.57142	1.02973					10.3176	2.41697	0.416127	7.98995	4.66122	1.27949	5.06272	24.2204	9.35016	4.43338	11.5515	4.72026					0.651166	4.72268	1.48379	0.381846	1.04491	0.211572	5.31495	0.33399	0.297644	4.68908	3.18635	0.953448					0.047017
	0.776716	2.12986	19.8596	9.40687	1.04833	2.14579	17.5788	0.751085	1.57727	4.10738	5.18641	0.861512					11.3841	2.80757	0.695004	9.9684	3.5968	1.39176	4.84357	25.69	9.98912	4.72921	14.2299	1.47778					0.935924	4.16956	1.60343	0.29897	1.73355	0.67829	3.68174	0.523697	0.029076	2.46861	1.90705	2.98589					0.016184
	1.54843	1.68323	20.1766	10.2352	1.28119	1.87097	18.769	0.980791	1.88838	2.26893	4.78936	0.581338					9.97753	2.3347	1.43367	10.2889	4.26777	0.892427	4.79532	23.8219	8.55294	5.21877	15.3494	0.427592					0.897413	3.54039	0.677853	0.243781	2.31894	0.732735	3.1715	1.02378	0.0323171	1.44986	1.06383	3.34936					0.0511519
	0.980902	0.989691	20.1878	9.96866	0.565422	1.7695	16.3679	0.781074	1.8987	1.34779	3.24143	0.153689					11.479	3.13969	0.995944	9.2362	4.6737	1.03869	3.85137	25.3144	11.6405	4.59867	16.0686	0.799617					1.02315	3.00312	0.614782	0.202968	1.16239	1.06916	2.16593	1.07773	0.031485	2.1823	0.887296	5.73258					0.123791
	0.107049	0.180942	19.7043	10.5391	0.865382	2.46698	13.6489	0.579459	2.26967	5.01275	2.3145	0.212605					9.53433	2.09561	0.684645	7.21629	4.65799	0.637004	3.79019	25.133	11.8003	4.58308	13.5275	2.2146					1.27273	4.86744	0.525365	0.0888414	0.628733	1.05246	2.36556	1.01284	0.0702979	3.15258	2.41616	6.70308					0.0347142
	0.366277	0.460775	21.9173	9.37838	1.39582	3.12091	7.94093	0.37458	1.53218	6.1937	1.23252	0.168617					10.7867	1.54677	0.482501	8.64543	4.68704	0.166555	3.3796	23.5077	11.7111	4.08699	12.8897	2.53184					0.424857	4.25753	0.318253	0.0274775	0.409323	1.06836	5.41676	0.662422	0.052118	2.11019	2.03284	8.05578					0.0456822
	2.93745	0.567891	20.8324	10.2396	1.5976	3.19267	3.46483	0.691594	1.58663	7.44349	1.44202	0.443288					9.35203	0.827118	0.790638	7.91272	4.63049	0.785794	2.25857	21.3975	12.8378	3.28117	11.07	3.46443					0.607954	1.42115	0.205558	0.0765947	0.416095	1.16816	4.48956	0.642983	0.0459593	1.63755	1.46406	9.66103					0.0294347
	2.16	0.958918	22.4152	7.02347	5.85596	3.14131	1.54737	1.22863	1.66807	6.73198	1.23979	0.32567					6.6593	0.35935	0.79617	4.95241	4.38064	1.43182	3.66067	18.1918	14.2434	1.60048	8.66334	5.31208					0.33771	1.90335	0.161936	0.03743	0.184157	1.32909	3.09654	0.381039	0.0147945	1.40912	1.40667	10.8967					0.0892129
	1.62476	1.32824	20.7264	4.63281	4.62154	2.94498	1.11599	1.56169	1.18381	5.73588	1.41833	0.0847559					5.03282	1.23831	0.952965	3.11034	3.11738	2.21792	2.58838	16.8616	13.1241	1.04126	6.49991	3.68798					0.376859	3.15406	0.683521	0.0238568	1.63393	1.31611	1.73732	0.522428	0.0222352	1.27836	1.54938	11.5268					0.0408985
	1.50864	2.2516	19.5687	1.59229	4.30859	3.13021	4.12429	1.58758	1.85372	5.56018	0.51516	0.253186					3.81423	0.82944	1.99947	2.5034	2.24404	3.77786	3.88254	14.8943	13.0837	1.49863	5.00688	4.09491					0.64222	2.49944	0.954472	0.0311674	1.07063	1.40747	3.274	0.520262	0.0241034	1.82025	1.52154	14.6271					0.0876489
	0.867318	1.36806	20.95	1.56867	3.84699	3.15995	4.47422	1.93261	0.855734	4.36775	0.702452	0.596057					2.48668	0.479791	1.45932	2.80702	1.44456	4.69	2.94145	11.0601	12.3896	2.4037	3.77394	4.58061					0.436368	2.38892	0.63468	0.0836808	1.41091	1.61286	4.88175	0.0971536	0.0541803	1.08574	1.2466	12.8159					0.0181934
	0.825156	0.23778	18.6449	1.26516	7.3226	3.87376	5.62877	4.59948	0.766485	3.55828	0.319533	0.237733					1.64005	0.486816	0.775658	3.28685	0.13546	4.24213	2.43456	8.24073	11.2394	3.72021	3.44615	3.82393					0.278868	3.07856	1.10676	0.0354372	1.46038	1.6669	3.31297	0.324874	0.321227	0.992234	0.978664	10.3538					0.0848467
	0.568636	0.508164	19.8429	1.16951	4.44897	3.8812	6.03256	2.87731	0.765553	3.2563	0.176081	0.131084					0.940846	0.126186	0.390282	3.74334	1.10603	7.0418	3.20662	6.13678	11.3253	5.20238	1.48703	3.02003					0.59417	2.92201	0.646907	0.0210419	1.31338	2.48343	3.94128	0.0542367	0.268018	1.16777	0.691019	10.3747					0.0516693
	0.229113	0.86596	18.4279	1.44346	3.64187	4.65147	5.04063	2.44913	0.18324	2.0578	0.445431	0.348004					0.830964	0.197557	0.110119	2.71356	2.2133	10.2419	4.42077	5.19066	5.77922	10.427	1.85989	2.23256					0.501571	3.3882	0.402926	0.0193254	0.609266	2.7726	4.30056	0.23278	0.504427	0.52844	0.43457	8.91426					0.068853
	0.251869	2.41677	17.3938	2.28614	2.18233	4.06248	3.70049	2.37068	0.65833	1.2721	0.406202	0.650817					0.968793	0.165743	1.56182	3.15784	1.57036	9.91206	5.6359	5.43039	4.95651	13.7558	1.83767	2.27433					0.405377	4.27629	0.181284	0.038106	1.06986	3.24957	4.14951	0.164283	0.26073	1.00961	0.390568	10.8771					0.00823766
	1.8953	1.57388	15.8807	2.08108	3.48364	3.76921	2.8019	2.19277	1.08896	1.42196	1.51577	1.09586					2.02038	0.213408	1.64063	2.09457	2.5893	11.4041	5.57906	6.64452	4.26903	14.1711	2.22767	1.81585					0.345524	5.08527	0.407762	0.0278211	0.961569	3.70596	4.90374	0.0571495	0.390098	1.15507	0.269228	13.017					0.0836372
	2.64556	0.739306	13.4539	2.95072	2.36145	3.72587	1.83538	2.37926	2.02751	2.1487	1.44326	0.927571					3.02199	0.488594	0.238903	2.12155	3.62914	13.9281	6.56339	4.94926	3.05444	13.9031	2.80487	1.26051					0.0160178	5.13744	0.684803	0.0213839	1.0208	3.94631	1.36634	0.578631	0.15739	1.10029	0.17748	14.6372					0.0234756
	2.23357	1.61347	12.3423	4.0871	1.20362	4.31568	1.4986	3.47147	2.04178	2.94607	2.38272	1.36471					2.51263	0.37423	0.623829	2.13318	2.95285	12.9426	3.9606	6.18279	2.73913	13.1347	3.75775	1.01163					0.529666	5.13539	0.798555	0.0436466	1.31758	3.51681	4.10546	0.702543	0.11528	0.887233	0.89727	16.6048					0.0880156
	1.79439	4.64712	9.21337	3.58982	0.735834	3.36257	1.1712	4.49362	2.38615	2.31442	4.19435	1.87684					3.14589	0.0690284	0.498532	2.4906	2.62107	14.8827	3.83195	5.2816	2.69304	11.2937	4.44494	0.98762					0.358374	4.43356	0.513533	0.0165952	1.17231	3.27607	2.24243	0.514459	0.248691	0.0756092	3.60296	18.503					0.0468782
	0.78267	5.34586	7.44997	6.65115	10.5172	3.43909	0.409155	3.728	2.31569	0.729018	4.8533	2.26897					7.37961	0.0576359	0.389949	2.38446	1.42495	13.9131	4.13848	5.09211	4.11907	9.07994	4.31535	1.7882					0.235431	4.13851	0.089424	0.0261026	1.51041	1.64555	1.41942	0.161691	0.0626524	0.235583	3.61538	19.1929					0.0921091
	0.624692	10.6544	6.51862	5.25609	3.55687	2.27154	0.211617	3.73148	2.48331	4.95073	5.27331	2.15854					5.2739	0.10482	0.376532	2.25694	1.33747	16.0644	4.13066	6.42159	6.39063	6.75473	3.66631	0.229386					0.409772	2.48659	0.0957694	0.0140502	1.8961	0.123801	0.363915	0.212007	0.118991	0.446443	2.98523	18.4875					0.0509211
	0.383369	10.7255	3.83606	4.16307	4.87669	1.38103	0.75547	4.394	2.12102	3.79477	6.09602	2.00465					3.42405	0.0917694	1.0722	2.81988	2.52903	15.5156	4.72205	3.36447	10.0485	4.77024	3.86812	5.89942					0.430858	1.519	1.47698	0.0428976	2.4164	2.22348	1.03963	0.366997	0.24435	0.41113	4.16656	20.9931					0.0329797
	0.6415	10.4123	3.20878	3.73042	0.844552	1.90723	0.825488	4.59136	2.60896	2.93777	8.6192	1.77113					3.10177	0.383503	1.22497	2.61557	2.80588	15.3878	5.44522	1.86481	11.0182	6.66424	2.88424	1.70347					0.602679	1.47715	2.09116	0.0208515	2.42224	1.81247	0.462548	0.338257	0.141169	0.520524	4.89793	19.4856					0.0745769
	1.19697	8.16326	3.8193	3.11182	6.33189	2.04719	1.10034	3.49537	3.54554	3.25723	8.05174	2.19554					5.45249	0.477716	1.09349	2.02988	2.0867	11.5343	4.55776	0.824772	9.83987	4.631	2.41527	1.32827					0.833096	2.27871	1.68231	0.100189	2.17572	2.1734	0.35287	0.214353	0.257594	0.606103	6.8295	17.8808					0.0419803
	1.47226	8.53258	3.64378	2.31924	2.39929	6.75684	0.938946	3.76237	3.8062	2.30777	9.95036	1.55555					2.69693	0.423523	0.559424	1.48334	2.2726	8.64618	3.17703	1.23995	9.39756	4.49843	1.40811	1.45603					1.24698	2.63129	2.6474	0.0603825	2.1701	2.26914	0.443198	0.856273	1.2294	1.02934	6.82708	18.6697					0.029498
	1.80579	7.48268	3.381	1.57842	2.14574	5.51007	0.771681	2.98815	5.03617	2.50481	7.76665	1.28535					4.10066	1.02758	0.303028	1.76816	2.0564	8.39173	3.0426	0.668618	11.3183	5.22009	1.67117	1.87289					1.38053	1.79315	4.24826	0.0262394	2.70985	2.36606	0.641688	0.768805	0.553995	0.453947	7.46793	18.4436					0.0717988
	2.20042	5.19582	3.32735	3.73238	11.2842	4.92981	0.693492	4.93664	6.97539	2.90973	6.28408	1.09013					4.19755	1.18717	0.883354	1.95894	1.98229	5.44136	4.18648	0.579523	10.3898	6.28257	1.00575	2.77336					1.29615	1.74809	3.37869	0.0385306	2.57903	2.78825	0.34007	0.122727	0.481783	0.663962	6.86214	18.8367					0.0697615
	1.4459	3.47828	2.96853	1.26878	12.1083	3.97123	0.22673	2.89735	8.75076	3.00884	4.23725	0.799007					3.13447	1.23759	2.37623	1.77578	0.426319	3.27086	3.69162	1.25842	7.91409	4.88307	2.09216	3.80898					1.35232	1.47685	4.70039	0.0313837	2.98244	3.03411	0.403211	0.144502	0.657688	1.47844	8.07711	17.4098					0.0855871
	1.74217	2.81327	3.96556	1.70994	10.8852	2.73934	0.264542	2.08789	10.3047	3.51661	3.002	0.546964					1.81815	1.7867	1.67155	1.92418	0.725779	1.73204	2.51864	0.941819	5.45258	5.62429	2.63895	4.1941					1.63742	1.47525	4.58356	0.0741182	2.34234	2.67393	0.217811	0.228856	1.52558	2.1929	11.2378	17.4932					0.136723
	2.46861	2.7469	5.21531	2.20377	10.694	2.638	0.233222	1.10119	10.9698	2.18656	0.0872172	0.432621					2.2948	1.3654	0.176548	2.16084	0.939674	1.41318	2.26283	1.28121	3.8481	7.31115	3.05371	5.90566					1.37071	0.78516	6.02024	0.0131023	2.01105	2.94707	0.357305	0.349893	1.78467	2.53625	8.33242	17.7145					0.107941
	2.48134	2.21822	5.46313	1.92812	11.5028	2.32561	0.586421	1.93479	14.0693	1.1805	2.08463	0.669555					1.6253	1.51977	0.427064	1.0554	2.32905	1.78435	2.4712	1.1581	2.2946	7.25612	3.17265	5.8332					1.18611	0.452366	6.904	0.00728709	1.99106	2.89698	0.535511	0.227554	2.35288	3.31593	8.55799	16.9338					0.238239
	3.34786	2.18876	2.89679	0.854613	10.6311	2.12824	0.350446	1.55287	17.1738	0.434443	3.28868	0.36681					1.59061	5.64803	0.447008	1.53199	3.44755	1.87103	2.05687	0.791575	1.5614	7.58617	2.99459	4.79223					1.43258	0.434372	8.56468	0.00219292	1.84139	2.44925	0.456946	0.210775	3.79087	2.80096	8.17813	17.7323					0.25221
	5.59359	1.90098	2.51311	0.680251	10.4623	3.01488	0.712022	2.53466	17.1485	1.11432	4.26414	0.192941					3.65188	4.75293	0.23768	2.19	3.0793	1.80926	2.48797	0.675587	0.63939	8.56826	3.24471	4.66509					1.30495	1.47465	7.98499	0.0065765	1.82102	1.07032	0.744505	0.496921	2.27516	3.42316	7.27205	15.3966					0.622975
	6.48845	2.38382	4.27024	1.38478	7.80673	4.07144	0.715396	4.49941	17.5623	1.32606	4.33474	0.327751					2.0451	5.77271	0.889078	1.98083	2.64915	1.72252	1.50774	0.565865	1.9033	8.98174	4.11964	4.32854					0.685353	0.762236	6.29348	0.0345414	1.97343	0.837865	2.49063	0.151875	2.18116	2.85407	10.5024	16.3836					0.506597
	7.46271	2.49337	3.76179	1.82235	6.14091	5.25541	1.10215	8.23187	15.729	1.79885	3.96497	0.231814					1.50409	6.58219	1.02922	0.884386	2.2406	2.0869	0.980376	2.53561	0.595795	8.64595	4.31748	2.57087					0.826197	1.80969	5.61116	0.0414986	1.63958	0.782991	1.45542	0.512315	2.21374	2.40122	9.29153	13.6926					0.557279
	10.6569	2.79728	1.52072	1.87499	4.38349	5.24387	0.638256	6.51866	16.3322	4.01497	3.3989	0.425627					0.780414	7.50674	1.40487	0.878782	2.07292	1.15402	0.289247	0.338489	1.10905	10.2129	5.14843	1.89959					0.734886	1.81521	8.69073	0.0925231	1.72286	0.939065	0.860097	0.32676	1.3794	2.29092	8.51684	14.3812					0.46306
	11.7265	3.33116	0.663803	0.364459	2.9483	4.88483	0.662375	7.62509	13.4068	5.98464	3.57679	0.266439					0.272638	7.43583	0.656622	0.853104	0.959557	1.32309	1.44288	0.550711	1.36316	11.477	3.25767	0.946831					0.868948	2.63632	7.86403	0.0866905	2.53874	0.58755	1.95082	0.214465	1.65105	1.81015	9.55145	12.965					0.479645
	11.012	2.8788	0.905368	1.57698	2.50029	6.95808	0.568041	6.61311	13.1533	4.12353	3.65937	0.495588					0.374696	7.10542	0.599018	0.776926	0.796302	0.994119	1.46472	0.302415	1.23412	13.9636	2.40474	1.7995					0.609582	3.12875	4.51823	0.0467967	0.845168	0.507327	1.09591	0.0875809	3.39082	3.1585	7.66393	13.3456					0.295545
	7.8275	2.33358	0.945084	1.80363	4.96264	7.69971	0.184935	5.60264	12.0895	3.29706	2.79648	0.42157					0.697074	5.80406	1.38497	1.45092	0.882989	1.25546	1.35487	0.25295	0.388817	14.8607	2.40716	1.66521					0.828969	4.05775	5.55766	0.0533231	0.333326	0.413964	1.37029	0.339768	2.803	2.74974	5.63802	11.1036					0.0842934
	7.58088	1.70837	0.653958	2.72458	1.11327	11.062	0.256994	5.33146	10.2636	2.5599	1.62414	0.829413					0.649802	4.73506	0.863821	4.90723	0.311806	1.46127	1.33096	0.663249	4.3264	13.6349	1.5452	2.68331					0.784412	4.75308	6.11865	0.0299595	0.505031	0.198826	1.8816	0.0199101	2.98035	2.99739	5.83819	10.8824					0.129916
	6.16175	0.593878	6.23678	3.93753	2.09163	13.3643	0.224082	4.99155	9.34265	2.11835	1.10566	0.252121					0.22857	4.21426	0.225382	5.56083	0.576612	1.81775	0.964669	0.790817	2.57705	15.9021	1.18325	1.31544					1.34888	4.73086	7.32405	0.0416597	0.810094	0.0661256	1.97592	0.474244	2.87939	2.43135	6.43897	8.94557					0.135025
	5.73393	0.874459	2.55067	6.6629	2.01792	16.2576	0.41131	5.11037	8.93726	3.25564	1.14362	0.729951					0.363365	3.94898	0.359608	3.57107	1.25934	1.13917	1.28161	0.359118	2.09685	14.4717	0.153798	0.889178					1.75465	4.05497	10.7346	0.0230144	4.36027	0.294146	1.63943	0.609993	2.3211	2.17133	5.81289	7.73754					0.145798
	4.31824	0.67954	4.64189	3.91267	1.69549	16.4117	0.726306	5.36516	9.04107	1.2277	0.90394	1.15584					1.09371	4.48161	0.338666	1.47552	0.90568	1.03674	0.632294	0.154609	2.19182	15.8696	1.28252	0.129746					2.27195	3.68035	7.89213	0.0109391	3.48133	0.324385	2.06299	0.641667	2.07678	1.57815	5.95979	7.01006					0.145208
	2.11017	0.574716	5.98192	3.66886	0.708483	16.6064	0.767194	4.17958	7.9764	1.26856	1.01864	0.940828					0.554217	4.36742	0.139562	0.150259	0.814044	0.70687	0.943105	1.27689	0.91687	14.9277	1.58287	0.3639					2.56233	2.90549	7.23489	0.0120319	5.26718	0.559524	2.21826	0.307922	2.0038	1.46294	7.99459	7.87851					0.100915
	2.09418	0.237211	17.8137	1.7771	1.19795	13.2785	0.374073	4.62061	7.97181	1.01131	4.65582	1.33681					0.721556	5.28558	0.240275	0.903345	0.574535	1.25055	0.75394	1.27871	2.28975	13.3141	0.475521	0.43223					3.42812	3.1558	12.1923	0.0251413	6.52203	0.412558	3.45687	0.615286	1.57591	1.44973	7.05102	6.34226					0.105062
	2.10604	1.5185	7.66836	0.932012	1.46856	11.0725	0.414749	5.77377	6.67294	0.790756	3.94598	1.77189					0.585124	6.5529	0.111447	1.2754	0.519792	1.98839	0.267664	1.35406	6.51078	10.6442	0.428995	1.69439					3.89492	1.57312	7.56495	0.0446026	6.91335	0.443855	3.26417	0.530812	1.12897	0.714435	7.28457	4.78917					0.219957
	1.12829	1.75199	6.62718	4.38083	0.585291	8.52987	0.193459	6.55867	3.64094	2.61379	3.8772	1.66506					0.58547	8.62893	0.421523	2.10149	0.259131	2.61519	0.297976	1.11952	3.92883	9.68245	0.276669	0.887895					3.32793	1.82097	2.11029	0.0293619	6.29611	0.45907	2.84785	0.718927	1.68476	1.37097	9.94464	3.76088					0.0586743
	1.84213	1.84364	4.46554	1.89096	0.315132	6.70928	0.347791	7.47601	1.93477	1.38249	7.76697	1.57256					0.332876	9.68357	0.170847	2.58066	0.180021	2.601	2.12186	1.60462	2.56897	8.50967	0.767447	2.45052					3.05883	1.36069	5.28208	0.0292263	6.49678	0.550018	3.24767	0.461567	1.05579	1.19144	7.58508	2.55248					0.112135
	0.62054	1.4076	4.13005	2.5133	0.334086	4.39194	0.252683	7.39511	1.30711	2.54373	8.09089	2.57596					0.755648	12.4264	0.368363	1.4509	0.285252	1.17618	1.00905	1.32809	1.0053	10.8653	2.00278	1.05172					2.94528	1.12902	5.35722	0.0632014	4.58881	0.950675	3.56465	0.478058	1.59291	0.381755	4.56561	2.7956					0.236292
	0.315104	1.23578	3.19365	2.471	0.346802	2.62589	0.546334	11.9331	0.27865	2.9021	10.0545	2.63441					0.799388	13.4296	0.231632	1.74564	0.193311	1.33511	1.2667	1.45075	0.783209	10.7073	1.28952	1.09846					3.41673	1.33675	4.79335	0.0464935	3.67587	1.17188	4.34641	0.461485	1.61064	0.389683	2.40359	2.67194					0.149055
	0.208558	1.45926	2.08454	2.00297	0.70934	1.79675	0.289586	9.32473	1.08865	3.10726	12.0092	3.83834					0.798723	12.2653	0.147542	0.377937	0.478728	1.76386	0.319023	1.04461	0.975368	10.7421	0.326428	0.289199					2.87026	1.00028	4.17683	0.0299517	2.83884	0.639495	5.27494	0.801936	1.06918	0.399429	2.25189	2.36869					0.0738623
	0.335082	1.12566	1.82599	2.41168	0.259192	1.28165	0.127212	9.34349	1.0557	3.0897	14.2873	4.1714					0.735921	11.6715	0.346245	1.02006	0.452129	1.21031	1.83929	0.523312	3.16247	13.1467	0.36111	1.94119					3.66734	1.3001	4.74462	0.0130302	2.05597	0.975868	3.77579	0.967432	0.881313	0.540667	1.73987	1.93172					0.099722
	1.43268	1.03924	0.814149	1.82185	0.569924	1.40678	0.0705486	8.14398	1.28311	2.46764	17.6935	4.83658					0.608801	11.1068	0.221077	0.69243	1.05151	3.37254	3.77756	0.293024	1.64742	7.66005	0.16058	1.43871					3.33222	1.1128	3.95225	0.00964041	1.71594	0.977819	4.60451	0.955194	0.649204	0.519782	1.47917	1.32845					0.124663
	1.1753	0.421788	0.861479	1.2947	2.1361	1.30243	0.402246	7.8135	1.43357	2.16117	20.4675	6.23786					0.796771	8.89106	0.148316	0.409659	2.14491	3.81476	5.96495	0.234719	2.02938	5.73291	0.660744	2.75187					2.8916	0.796593	5.33879	0.0121741	1.65953	0.38496	4.24361	1.14184	0.696818	1.16357	1.47866	1.20752					0.144153
	1.16048	0.130002	0.827914	1.09278	2.22833	1.52849	0.674114	7.27185	0.956933	1.14245	20.5758	5.11786					0.66524	7.03773	0.173502	0.470608	2.31756	3.11106	7.68726	0.21747	1.92452	5.28086	2.02578	4.44323					2.79088	3.05963	3.83841	0.0330615	0.943822	0.385972	2.79055	1.17816	0.695999	0.333207	2.10453	1.97637					0.0645174
	1.024	0.885743	0.212476	3.66683	2.07537	2.05196	0.899388	7.44336	0.955458	2.59925	16.641	6.34128					1.03852	4.7728	0.202128	0.301194	1.59436	3.72474	8.89311	0.538595	1.68899	3.39548	1.85644	4.48172					2.13838	6.93167	5.70001	0.017645	0.508734	0.574677	2.19674	1.17207	0.643765	0.690713	3.33764	2.13236					0.0649329
	0.645252	0.75967	0.364489	1.70436	1.9938	3.03731	0.882924	8.7938	1.07961	4.54867	15.8588	5.97271					0.734067	3.4338	0.648298	0.318703	0.494308	6.50409	12.4207	0.484952	1.83594	0.546714	1.25177	6.22518					2.79273	7.49896	3.51431	0.0106221	0.0845638	0.955461	2.29226	1.03212	0.622115	0.0714313	3.78059	3.8697					0.057813
	0.233579	0.925108	0.204597	1.90011	2.60827	3.36762	0.956944	12.7848	0.406247	4.29905	13.5313	6.06031					0.592024	2.23955	0.813914	0.152555	0.848359	5.29951	13.3433	1.1523	1.51594	2.09974	0.307315	4.48984					3.11222	9.14903	1.03257	0.0325029	0.962168	0.593432	4.52784	0.774673	0.30224	0.134595	4.35179	2.89054					0.183482
	0.174883	1.18512	0.172197	0.262755	2.48085	3.13165	0.699134	14.349	1.72249	3.39659	14.0782	4.55196					0.680514	2.76092	0.551418	0.575257	1.84466	4.86427	12.7045	1.29796	1.61648	1.51477	0.211068	5.81594					2.57017	10.0469	2.11596	0.00808503	2.06162	1.05572	3.79027	0.596899	0.579251	0.218287	4.56297	3.18717					0.0934625
	0.947109	1.36749	0.416355	4.45799	2.40912	2.83464	1.20384	16.8011	0.977212	2.04279	15.2963	6.47172					1.76199	2.07954	0.137205	1.27807	2.62446	2.9543	10.8999	0.66236	1.81199	2.25258	0.26693	5.40684					2.79246	9.76554	1.53004	0.051346	1.1991	0.227555	3.01569	0.637631	0.619579	0.221255	3.4517	3.5749					0.133935
	1.08215	3.01908	0.218696	1.04939	2.25862	2.65424	0.689116	16.2542	0.557711	1.88256	13.9412	5.80377					1.64935	1.55419	0.590357	1.68965	3.29044	1.99746	11.1588	0.321848	2.28807	1.79404	0.58738	6.2917					2.73303	12.3701	0.903533	0.010428	0.244744	0.584475	2.29823	0.384502	0.423662	0.0192361	3.74132	2.60439					0.156046
	0.837453	1.60775	0.434987	1.99718	1.57056	2.99113	0.634042	16.2743	1.05538	0.697915	14.9163	6.11414					1.25768	1.26429	1.29411	1.15662	6.48076	1.36532	12.3569	0.268136	4.12923	1.88182	1.41669	12.933					2.42047	12.2676	0.761865	0.0879529	0.443788	1.0584	3.58364	0.315321	0.936746	0.276596	3.68136	2.66155					0.0374374
	0.743948	1.21465	0.697735	1.76948	1.26177	3.62626	0.972613	14.2662	0.424766	0.886393	13.9781	9.59364					1.39976	1.32108	2.11309	2.64371	6.1072	0.342026	9.73796	0.297701	3.35301	2.41299	3.71637	7.28749					2.99391	10.273	0.638032	1.29323	0.941045	1.357	5.88524	0.148122	2.26259	0.0588333	3.1998	2.92536					0.0947497
	0.315438	1.01185	0.68686	2.89941	0.899693	2.45109	0.575006	14.8138	1.15491	1.02395	15.3889	8.6653					1.28873	0.970433	1.11279	2.6503	4.36466	1.3982	7.85708	0.383985	2.32146	1.83152	2.20585	4.65088					2.8131	10.314	0.394894	1.97647	0.574492	1.20436	5.43514	0.335614	2.10858	0.539906	2.87691	4.28715					0.0167748
	0.842366	0.148722	0.342536	0.749233	1.28831	2.10334	0.609082	14.5391	0.751827	1.62604	13.4672	10.7351					1.4333	0.63368	1.50493	1.96257	5.58028	1.00511	5.69752	1.01864	0.824319	1.19739	1.13952	4.52332					2.90912	9.66523	0.287047	1.14235	1.07946	1.03203	4.9759	0.301645	1.81097	0.587854	4.63161	3.7998					0.139532
	0.528231	0.786607	0.238069	0.676198	2.70265	1.50946	1.40061	14.1372	0.957178	2.13044	12.7627	10.3957					1.99785	0.841773	0.995671	1.76395	5.43305	1.56069	4.47164	0.718151	1.01364	1.03203	1.10727	6.73009					3.87335	8.94928	0.496892	0.693253	1.02762	0.697101	6.4641	0.904666	1.49012	0.275468	2.79385	3.08475					0.0376435
	0.303415	2.06096	0.308404	1.33572	4.90565	1.07643	0.38327	13.1915	0.273966	1.47892	10.4242	9.49139					2.11994	0.658771	0.370455	1.65924	6.74098	0.567509	3.54697	1.93625	0.302499	1.02896	2.11914	5.52782					5.96102	9.24741	1.01091	0.50567	0.406741	0.593254	6.443	1.01504	4.26019	0.0814029	3.06691	3.61938					0.106646
	0.264307	2.08819	0.101329	1.46659	6.00913	0.624622	0.366433	10.6069	0.538688	0.960794	10.1131	8.40302					2.20342	0.848028	0.228982	2.43058	6.00775	0.675022	2.51773	2.95591	1.14916	1.13155	0.882575	5.39296					6.07984	9.37437	1.34448	0.527823	0.218958	0.439203	6.75479	1.18069	4.83697	0.301094	3.87594	1.6867					0.0483209
	0.418169	3.40756	0.690437	3.70033	6.54461	0.48758	0.969975	10.5053	1.35167	0.461856	8.59544	8.45194					1.73948	0.90293	0.6995	2.94089	7.14028	1.27706	2.64877	2.21169	0.242823	0.570118	1.45287	4.8627					5.63581	9.75299	1.19801	0.727428	0.320829	0.167666	6.10458	1.50754	2.22981	0.207441	3.45882	1.00138					0.0124545
	0.507689	2.44124	1.06158	3.7121	5.95604	0.472225	0.468359	10.0473	3.972	0.647268	7.20139	7.96518					1.92794	1.02355	0.750645	2.85049	9.58171	0.479363	2.63712	2.57701	1.12294	0.424454	1.60408	3.05538					6.9445	11.0155	0.562933	1.0936	0.673111	0.185743	5.92397	1.26679	1.53438	0.0908221	2.11277	1.1288					0.0928441
	0.233854	3.44396	1.23835	3.48522	5.38484	0.66324	0.519461	9.48836	6.4212	0.664964	5.2546	6.12962					2.4172	0.644534	0.848676	2.68205	11.3222	0.263862	2.88952	2.19038	1.92341	0.676664	1.83763	2.33563					5.29454	11.6341	0.519647	0.762045	0.48943	0.23659	5.71256	1.31824	1.06519	0.0668057	2.27757	1.11631					0.0417403
	1.4293	2.26211	0.6175	1.79317	4.67286	1.0071	0.948263	9.69043	9.35066	1.25138	3.89966	6.68932					1.90818	0.702997	1.22786	2.69967	9.1365	0.452031	2.60764	2.73715	1.12031	0.423725	0.608224	1.87066					4.58068	14.5463	0.368482	0.971404	1.88268	0.788128	5.66098	1.86136	0.36297	0.0787811	4.39086	0.589839					0.0386279
	2.16291	1.79315	0.88608	4.28407	3.08091	0.57244	0.44883	8.48381	16.9899	1.35407	1.47881	4.97896					2.0434	0.78509	0.747754	2.09573	7.96133	0.145372	2.38608	3.06421	1.19806	0.594596	0.554338	1.02316					3.28827	15.6558	1.20322	0.606037	2.92778	0.596612	5.50843	1.61359	0.11634	0.16172	3.55757	0.245452					0.0337175
	2.07602	0.7885	0.664419	4.43392	2.87168	1.01871	0.55268	7.77446	19.3743	0.512115	0.765253	4.70488					1.76907	1.92265	0.152076	1.65313	6.40094	0.241045	2.36088	2.94977	0.640408	0.376946	0.0675428	0.774407					2.21666	16.3483	1.61304	0.451946	2.90659	0.584092	4.82752	1.14743	1.31802	0.0776498	3.31733	0.0546151					0.0237356
	2.39237	0.496811	0.736739	6.78709	2.38665	0.935736	0.616514	6.16631	22.9617	0.683595	0.850789	5.53774					1.48821	3.54895	1.03057	1.21724	5.08509	0.487519	2.19014	2.10543	0.969885	0.650034	0.245454	0.539506					0.753876	16.879	3.79403	0.378912	2.50757	0.624935	5.25826	0.759121	1.99698	0.0493074	4.00261	0.186257					0.0210414
	3.49916	0.236589	0.880104	4.42255	4.61266	0.5395	0.29323	6.44845	22.6819	0.691289	1.22225	3.63262					1.57133	2.49217	1.82914	1.23682	4.05997	0.102458	1.6857	1.12391	0.107589	3.41498	0.780939	0.237517					1.13285	15.7801	3.84363	0.225829	2.58608	0.353644	5.3817	0.262113	1.56462	0.047347	5.16828	0.25024					0.0226802
	4.23759	0.608023	0.234753	4.57865	1.54297	0.943903	0.492693	5.15341	21.132	0.941285	2.09557	2.16994					1.356	1.40871	2.66483	1.2116	3.08205	0.110803	1.29095	0.498087	0.611718	0.690564	1.56771	0.364861					0.902817	17.3027	3.51239	0.171811	1.87369	1.12009	5.61228	0.754975	1.19819	0.11131	7.79064	0.617294					0.068893
	5.23986	1.05244	0.444633	4.2007	1.55898	0.653218	0.718331	5.26327	20.6402	1.1756	1.86161	4.15775					1.27767	0.512391	1.48393	0.875873	3.06231	0.213091	0.899925	1.98969	0.703482	1.31856	2.28063	0.319765					0.668096	19.5888	2.91152	0.325519	1.20657	1.17533	5.68986	0.409679	1.57777	0.0432512	7.89104	0.41046					0.0797094
	7.70576	1.5214	0.592278	3.5853	2.7705	0.454891	0.211393	3.90471	21.6839	0.584164	1.6654	1.81					1.08564	0.114539	1.89334	0.609124	3.26946	0.18784	1.17855	1.85275	1.14519	2.17421	6.51596	0.548707					1.039	21.8821	3.03888	0.380515	1.62629	0.762471	4.7547	0.100383	1.22944	0.039146	8.7159	0.848939					0.113093
	8.59335	1.29523	0.956713	4.01211	4.60642	0.555591	0.294686	1.61578	25.3502	0.855559	2.2108	6.79949					0.605987	0.563655	2.14335	1.10939	2.74752	0.407268	1.19507	2.16954	0.706827	3.1154	4.1309	0.731991					1.5922	23.1082	3.70717	0.227136	3.61947	0.78082	4.7183	0.617159	1.02567	0.00938912	10.1884	0.570794					0.150501
	10.3354	1.02119	1.62633	2.74624	4.62904	0.415863	0.37692	1.38838	17.9626	0.931665	3.41332	4.59811					0.888982	1.49955	1.72562	2.57712	2.35699	0.436538	1.39035	1.48111	0.598106	2.64566	3.47567	0.65246					1.43817	23.5263	6.9041	0.284498	3.45357	0.418194	5.96515	0.67229	1.09846	0.0193444	8.24453	1.29562					0.0486416
	9.88478	0.910066	2.77974	3.83212	2.27035	0.457868	0.641871	0.30376	16.2293	0.556393	4.14858	4.96564					0.666531	2.12507	1.53948	2.88109	1.33258	0.276493	1.00631	1.03386	0.292784	2.09924	3.17241	0.446473					2.19053	21.4229	5.53679	0.166894	3.59005	0.143285	6.06712	0.296566	0.782459	0.0285368	7.61355	1.44554					0.126108
	10.1623	0.869189	1.35628	2.38305	4.00486	0.443224	0.303648	3.52577	19.4019	1.00297	4.2713	4.19653					0.661853	2.24368	1.24216	3.7565	1.88675	0.44918	1.42901	0.918564	0.43388	2.72258	3.17657	0.505142					2.9609	21.0076	3.30164	0.197743	4.04971	0.378382	6.02858	0.514158	0.480576	0.0309784	6.74604	1.55337					0.0654662
	9.2506	0.598589	1.84414	1.4989	3.40549	0.114484	0.184467	1.48572	17.7036	0.508073	4.7361	4.97988					0.869203	2.14019	0.559747	6.31757	4.11353	0.356015	0.983902	0.59946	0.684551	2.25969	2.49457	0.431677					2.34063	20.2284	4.93405	0.853649	3.4514	0.449152	4.88647	0.117693	0.980363	0.118418	5.72119	1.67442					0.0800441
	4.97911	0.739762	0.931596	0.900415	7.2749	0.269554	0.305684	0.614073	15.6311	0.564905	5.03871	3.37568					0.522983	2.98142	1.15748	6.62385	1.90638	0.280572	0.822092	0.742318	0.221853	2.35549	1.8129	0.139146					2.01245	18.3209	3.3298	0.401505	2.70429	0.561811	3.48459	0.327197	0.234838	0.124015	4.54476	1.11768					0.0902206
	3.2918	0.508908	1.21431	0.50363	6.81422	0.0997133	0.855787	1.40198	17.8514	0.754784	5.13011	3.19095					0.452174	4.64994	0.800369	9.82993	1.13279	0.35985	0.725125	0.800496	0.612781	3.55805	1.48091	1.43714					1.82958	17.8366	2.55572	0.748976	2.39607	0.6562	3.20682	0.454337	0.500459	0.0418169	3.64489	0.835589					0.103302
	1.64884	0.366374	1.2839	1.58664	11.1227	0.856325	0.565566	0.672052	17.2822	0.669412	4.41284	3.89348					0.45756	4.35788	2.38755	12.7561	1.24752	0.477164	0.776689	1.66347	0.175398	4.66683	1.58256	0.560198					1.13646	19.6119	6.86432	0.492038	2.61289	0.575018	2.30146	0.414226	0.349657	0.0226882	0.366751	0.474084					0.061041
	0.624319	0.327576	0.658606	1.72975	12.5372	0.502565	0.80455	0.259538	14.0471	0.93666	4.94878	3.61245					0.0496872	4.37925	2.01568	11.7002	0.637944	0.0977624	0.96122	2.46591	0.194038	5.52101	1.95677	0.258565					0.764621	20.2852	4.89343	0.521532	3.21851	0.659669	1.65863	0.263442	0.429543	0.0346362	3.38578	0.298548					0.0566689
	0.758814	0.582835	0.737654	1.75553	13.4731	0.742197	0.446741	0.629221	13.2117	0.967228	5.35164	2.32695					0.133581	5.34409	1.86417	13.5929	1.09441	0.0931091	0.57845	3.23865	0.315363	7.44635	1.724	0.188468					0.826579	21.4231	4.48388	0.324721	4.25103	1.31732	1.54551	0.110837	0.326684	0.0845855	5.34276	0.388734					0.0985407
	0.634746	0.376657	0.546234	2.56963	12.309	0.593188	0.492781	0.642373	10.8793	0.459608	5.10143	1.81552					0.336592	6.00652	0.837956	11.4725	0.466752	0.721203	0.523052	5.57424	0.39015	7.93668	1.74921	0.124979					0.321997	20.2769	1.5943	0.305905	4.57905	1.48648	1.2399	0.172068	0.110095	0.0149207	6.40996	0.373308					0.196591
	1.26368	1.26211	0.27487	3.91333	13.773	0.322271	0.815276	0.702355	7.69444	0.526072	5.94131	0.41879					0.144833	11.3736	0.512281	10.5504	0.715751	0.384778	0.343378	4.15605	0.489212	7.14886	2.09442	0.0349751					0.371096	17.8613	3.43716	0.149347	4.73604	2.00121	1.20101	0.521371	0.117261	0.0561975	5.6522	0.448421					0.13746
	0.732482	0.531399	0.439013	3.84375	16.051	0.447562	1.70178	1.05522	6.09415	0.662416	6.81121	1.04288					0.920438	7.24711	1.85381	10.5816	2.2381	0.614093	0.18337	4.15771	0.491758	7.94513	1.94105	0.810357					0.515101	14.344	4.72683	1.27231	4.2445	2.11896	1.70199	0.268383	0.973916	0.0190727	4.74199	0.477904					0.142949
	0.378438	0.605273	0.904734	5.20073	16.7425	0.428482	0.506807	0.911054	3.04565	0.260525	10.1217	0.192405					1.13612	6.11127	2.02891	9.77554	0.938279	0.501243	0.588002	4.57146	0.783985	8.51023	1.16935	0.281801					1.38484	12.7112	2.70091	0.735468	4.44318	1.69849	0.803528	0.334733	0.96388	0.0161726	3.79083	0.498093					0.131888
	0.370225	0.851107	1.15234	4.13957	14.0299	0.498019	0.398433	1.24451	3.87622	0.0915772	10.6256	3.99469					2.59573	6.114	1.54263	8.57461	1.07504	0.497386	1.01568	4.24419	0.283682	9.93585	0.619487	0.58207					0.911345	12.4978	5.79801	0.651518	4.13293	1.29039	0.243678	0.240246	0.443566	0.0261387	3.51738	0.788032					0.0823387
	0.660782	1.37004	1.69666	3.57871	16.4535	0.78465	0.845019	0.345888	4.43303	0.538052	10.3421	2.65752					1.4407	5.00976	0.841176	9.11894	0.220637	0.197629	1.29598	3.75843	0.200333	9.95675	0.286165	0.456785					0.435063	13.691	7.37703	0.578919	3.51984	1.01757	0.158486	0.393957	0.513563	0.0253557	2.95763	1.07357					0.190398
	0.215084	2.73274	15.8722	3.16328	13.4615	0.592086	0.666882	0.386284	3.1709	0.159152	12.2891	1.67922					1.71653	10.0817	1.28141	7.5006	2.79108	0.204666	2.19617	5.5039	0.405289	8.73223	0.419666	4.48516					1.80169	12.0173	6.78815	0.576414	2.63271	0.61656	0.309472	0.624635	0.226813	0.0727403	4.38012	0.949482					0.0769829
	0.60744	5.66485	3.33075	5.91056	14.2657	0.362148	1.95928	0.571523	3.21797	0.365289	11.5581	6.08099					1.19843	6.39152	0.494945	10.2423	0.445087	0.304643	1.94523	3.65332	0.249034	8.11545	0.0914448	1.21101					3.65119	11.0945	5.3428	0.362099	2.17698	0.327019	0.141873	0.356879	0.285668	0.0660126	5.23929	1.17182					0.129023
	1.68177	4.05788	11.7339	7.12088	11.6883	0.661482	0.659147	0.98932	2.37739	0.244806	9.98024	2.67135					1.47498	5.95416	1.06689	8.41586	0.136255	0.159442	1.69132	2.9678	0.648604	7.19726	1.12535	1.29727					4.07316	8.05144	3.58973	0.312941	1.59502	0.132263	0.312741	0.364897	0.392845	0.021662	5.57439	0.945165					0.0753476
	2.17278	1.73724	10.2103	4.00175	10.0684	0.464947	0.654282	1.82463	2.05209	0.687823	11.317	2.34738					1.21622	4.66124	0.539522	8.36773	7.30322	0.27445	1.08394	1.92646	1.65808	5.59563	1.05368	1.0663					5.20275	6.15434	4.15923	0.22392	1.39724	0.450707	0.250238	0.257141	0.300623	0.082504	7.74572	0.808724					0.257582
	2.47177	0.47716	7.46362	3.10883	9.01565	0.472634	0.500919	2.65152	0.7103	0.026501	11.1015	2.30254					1.29581	3.77438	0.185301	10.2279	6.6599	0.21678	0.814435	1.31412	2.22091	5.70584	1.02814	1.4381					5.75801	5.44243	4.22092	0.30589	1.39694	0.597918	0.35181	0.152467	0.246317	0.0498121	8.62137	0.665268					0.139373
	2.34518	1.08101	15.1535	4.37853	10.2093	0.551723	0.370187	2.67234	1.85858	0.0840151	11.972	3.31295					0.534993	3.34123	0.603396	8.28349	7.44213	0.262538	0.536913	1.35757	0.411328	5.5488	2.27448	1.17217					3.44413	3.67809	7.16663	0.224458	1.13152	0.272552	0.681943	0.1009	0.113345	0.0342169	7.33149	0.138606					0.747673
	1.85194	1.54408	10.2974	4.26495	7.48168	1.06827	0.426754	3.60193	2.62358	0.360387	11.5229	5.1432					0.395204	5.26463	0.748645	6.4089	11.2152	0.242528	1.48385	1.15469	0.721851	4.77463	1.45133	1.25765					2.45427	3.48735	9.62325	0.135083	1.01343	0.473047	0.382239	0.242818	0.107042	0.0327766	7.57691	0.118162					1.20424
	2.12046	0.992361	8.72191	4.75456	6.97779	1.87861	0.0479837	2.61724	3.40565	0.492067	15.5312	5.90445					0.394953	4.51751	0.765671	4.75597	9.66522	0.694069	2.75446	1.28838	1.5222	3.72199	1.18099	1.68212					1.91098	3.71953	6.52384	0.443528	0.941107	1.19411	0.30627	0.184471	0.0275002	0.0157366	8.53413	0.143217					1.44756
	1.25168	0.788249	7.66387	3.60747	9.15942	2.86835	1.34837	1.94299	4.67915	0.374276	14.6521	5.61755					3.72895	3.87012	0.377841	3.98981	8.30384	0.145791	3.23314	0.858826	0.718451	3.46691	1.19501	0.969113					1.25377	2.77217	3.66822	0.527172	0.626237	1.15175	1.665	0.220345	0.0687211	0.00566475	8.94879	1.15598					1.48787
	1.67988	0.597818	6.89951	3.70488	6.97154	2.88473	0.661351	3.25286	3.74837	0.973815	14.5522	4.83491					3.91584	3.20541	0.23143	4.62927	10.4715	0.260446	1.90002	0.765386	0.935867	3.15458	1.48985	0.871138					0.389406	2.75812	3.17991	0.48371	0.338515	1.08208	2.41899	0.270693	0.875413	0.0526778	8.29567	2.10243					1.45385
	1.94126	3.16462	4.42834	3.77329	9.89641	3.35768	1.44329	2.48717	3.51738	0.471693	12.7102	2.14958					3.6397	3.98211	0.510798	5.37733	8.603	0.511843	1.50193	2.37618	0.379454	2.6278	1.01726	1.74916					0.0520358	2.60065	5.17148	0.673258	0.402112	0.775784	3.84713	0.383644	2.83719	0.0281341	10.7431	1.65501					1.72347
	3.06665	2.49927	1.54986	2.8144	9.91948	3.65944	1.51435	2.20778	2.65654	0.39016	13.618	1.82704					4.04177	5.20219	0.946916	4.42722	7.22472	0.536687	1.48684	3.30346	0.219185	2.1558	1.37663	1.42638					0.387468	2.03082	2.81817	1.12776	0.391298	0.827406	3.89376	0.103908	1.67634	0.0656762	7.97433	2.01808					1.6717
	3.30184	1.87084	1.06319	2.38578	13.2743	5.22016	0.216711	3.63053	4.04895	0.580603	13.1102	1.72034					3.8249	4.43718	0.634232	3.84429	6.89323	0.717347	3.11379	5.08853	0.187701	1.9319	1.73585	3.79113					0.137162	1.53949	2.51184	1.10507	0.249386	1.0849	4.07436	0.203539	2.13695	0.11981	6.75388	1.96297					1.82777
	2.85499	1.11175	1.28999	1.24971	14.8663	5.24757	0.190264	5.68915	4.18748	1.13419	14.8714	2.31663					3.16501	4.45866	0.395727	3.92519	6.20405	0.454627	1.81935	7.50546	0.414588	1.8506	0.926742	2.30217					0.24782	1.3077	2.0745	0.683411	0.252342	0.358102	4.26857	0.392212	1.58337	0.0889488	5.63335	0.713651					2.79566
	2.90426	4.26639	3.87207	1.97684	16.8801	6.30618	0.836422	4.74258	5.01299	0.64328	13.8719	4.64203					3.34904	3.76984	0.367073	2.66222	6.18894	0.718683	1.38754	6.95282	0.550533	1.71081	0.9398	2.39786					0.254513	1.40241	0.642872	0.657764	0.213928	0.279764	3.04531	0.273875	0.92154	0.0484198	5.09585	1.21457					3.47697
	2.85514	4.00611	6.27085	1.30218	17.9119	5.85964	0.675947	5.59176	8.59783	0.597448	11.9075	3.19606					3.33862	3.66968	0.827927	3.51639	4.57312	0.81777	1.23311	7.24087	0.760589	4.39965	0.617006	2.41894					0.123728	1.47489	0.839841	0.699134	0.172429	0.15528	2.22678	0.100544	0.17907	0.0527955	5.80155	1.75983					3.72272
	3.61904	1.29883	4.57859	0.711924	18.5457	3.50104	0.427298	6.5021	10.9924	0.405561	12.8962	4.05668					3.16442	3.74689	0.822178	3.45675	3.64536	0.545044	4.06673	8.67822	0.314863	4.77394	0.274931	2.22949					0.557699	1.04552	0.334928	0.547169	0.146219	0.162884	1.65511	0.122377	0.692674	0.447505	5.01684	1.97003					4.42717
	4.01928	1.55471	4.37268	1.31332	18.7177	2.65215	0.17326	7.21161	12.2462	0.744752	10.9602	3.51428					2.67084	4.26295	0.464226	3.88715	3.03969	0.627634	1.00513	6.76466	0.315807	3.71359	0.51137	2.17911					0.181167	3.30047	0.253239	0.218484	0.188056	0.263861	1.31094	0.328937	1.66378	0.311343	5.09542	1.4375					4.26198
	3.66315	2.45027	5.83104	1.23317	21.9332	2.15413	0.841286	8.77416	12.427	0.272118	13.9696	1.43393					2.4238	4.47152	0.194112	5.20309	2.98693	0.346002	1.12111	9.26929	0.487644	4.20007	0.839931	1.98803					0.180073	2.94551	0.124006	0.136429	0.0796449	0.42839	0.595978	0.0950217	1.66452	0.890781	6.77154	0.664129					3.35459
	3.52349	1.61942	2.0385	3.11184	22.7999	2.14323	0.136579	11.4309	14.418	0.829132	11.7114	0.817231					4.62262	3.57328	0.172909	7.94659	2.15507	0.54288	1.02134	8.94026	0.736171	4.85674	0.607755	0.507431					0.0580777	4.12803	0.221082	0.0714488	0.166644	0.499472	0.475458	0.0953336	1.86383	0.70429	4.28595	1.22516					3.10267
	3.17507	2.50441	1.26997	5.31911	21.2313	2.90358	0.920764	12.9163	14.5356	0.533965	12.6954	1.36454					3.80325	3.16116	0.158795	9.87164	1.73688	0.575652	0.862068	9.57691	0.457415	3.92224	1.34399	0.360638					0.0757704	3.49094	0.267152	0.16821	0.101584	1.57781	0.467476	0.299321	1.25188	0.577467	0.672703	1.38382					2.23189
	3.42979	2.65493	0.476375	8.02792	22.0119	1.88903	0.529196	14.75	12.5794	0.448837	10.8926	1.5326					2.89677	4.87232	0.810782	10.602	1.66034	0.379227	0.43396	13.8853	1.56994	3.68084	0.307802	0.860555					1.7449	3.18625	0.796406	0.499214	0.10796	2.08411	0.352055	0.0681887	1.23066	0.302178	5.62493	0.148195					1.60188
	3.3853	3.667	3.20314	5.65121	20.9041	0.931627	0.940558	16.2257	9.97889	0.760959	13.9305	2.70842					1.67514	5.10294	0.273971	11.8883	2.12187	0.401679	0.162707	13.3668	0.674269	2.95212	0.480772	0.548298					1.0334	3.74296	0.834338	1.01194	0.140634	1.89838	0.853498	0.297069	0.699906	0.758576	2.53932	0.418773					1.94255
	3.31602	4.5641	3.49919	7.15914	20.2066	1.08503	0.426374	15.7977	8.93167	0.405843	15.0406	1.03562					1.32773	5.45009	0.154903	12.5189	1.8414	0.613526	0.517925	13.9026	1.2789	2.40441	1.52229	0.822593					1.07601	3.11974	0.422864	1.13356	0.0841183	1.43812	1.0608	0.249094	0.590026	0.578962	3.15591	0.564024					0.850125
	3.09463	2.7042	1.91152	4.58535	19.1748	0.699949	1.61474	19.4846	5.5069	0.826051	15.9811	0.918913					0.761561	6.40892	0.0675122	13.03	1.5182	0.73914	0.390626	12.2456	0.331798	0.936922	1.81588	0.990045					0.42444	3.20378	0.384873	0.709565	0.137195	1.14627	0.730211	0.465158	0.28949	0.450948	1.76647	2.01452					1.02357
	2.84937	5.15401	2.55483	3.81113	19.8242	0.719216	0.43213	15.9597	4.30607	1.20357	17.0204	0.654756					0.664835	4.69828	0.95382	13.1982	1.15418	0.906113	0.712535	10.9259	0.381879	0.584902	1.05357	0.391944					1.08154	2.93005	0.520857	0.496338	0.0709695	0.572735	1.03278	0.213955	0.107831	0.823337	2.31274	2.83393					4.96058
	2.54465	3.82031	2.58616	2.94978	16.3521	0.572004	0.869364	10.3347	3.75942	0.905677	14.4913	0.949844					0.872011	3.9822	1.07302	11.1243	1.10876	0.7241	0.747599	12.5685	0.914476	1.55362	0.8192	0.513559					0.180889	3.59407	2.0503	0.469264	0.0627892	0.273268	0.642658	0.23939	0.374818	0.211168	2.75914	2.96537					2.90989
	1.94963	4.56794	4.44136	2.31017	18.9044	0.617718	0.341244	10.5343	2.51729	1.02892	17.4172	0.540904					1.06564	4.99295	0.632804	11.0174	0.602667	1.36237	0.420606	14.8014	1.27799	0.31219	0.332276	0.712223					0.472607	4.52726	2.41701	0.606194	0.0247156	0.161815	2.0327	0.553796	0.228334	0.66232	2.37308	2.18515					1.78084
	2.37832	6.90416	1.77454	1.99635	16.9721	0.961193	0.716477	13.3246	2.21454	0.955458	16.1903	0.239371					1.73092	3.55944	0.597888	11.2822	0.434868	0.990898	0.523506	14.9319	2.20773	0.318246	0.315276	0.715614					2.57055	4.29956	1.64901	0.429734	0.0410217	0.472493	1.43592	0.928299	0.0761209	0.664811	1.88822	3.79853					2.48634
	1.69742	2.75608	5.06971	2.22712	14.3564	1.62532	0.122932	7.78728	3.35928	1.12467	13.8577	0.501383					2.03947	3.27376	0.2535	11.0277	1.0309	0.855814	1.90625	15.4167	3.58651	0.601897	0.644689	0.417109					3.04627	3.2944	1.45787	0.824704	0.0980932	0.823336	1.48425	0.455503	0.0326518	0.571162	1.29933	2.23443					2.7195
	1.09288	2.75012	3.68092	1.18164	15.0197	1.69896	0.941541	5.50453	5.75529	1.05421	11.7653	0.466292					1.3617	2.84488	0.808749	9.76847	0.862865	0.748241	2.2329	13.5071	3.99193	1.07539	0.311696	0.317619					5.66904	3.25701	1.18262	0.51963	0.0770669	0.695973	1.84252	0.929035	0.0642074	1.812	1.49928	4.01447					2.96493
	0.909933	2.88271	1.20123	1.24983	13.7575	4.05262	0.937375	4.31271	5.24427	0.597406	9.79395	0.796158					1.67916	2.23778	1.32693	2.94119	0.487987	0.665984	1.36674	14.8294	4.53088	1.33709	0.368777	0.0896368					5.07111	2.59667	0.777406	0.368824	0.035673	0.659063	0.858301	0.824953	0.25896	0.523595	1.50699	5.2413					2.67688
	0.7135	2.25686	3.78134	2.0272	12.5642	4.91648	0.310763	2.65838	5.90379	0.294285	8.06835	2.09999					1.2108	2.48405	1.12909	3.41573	1.33907	0.695927	0.832948	12.2002	5.06799	1.44679	0.394007	0.263334					4.47523	3.43521	0.45855	0.641271	0.0506136	0.422479	0.964412	0.919192	0.153548	0.249266	1.50672	5.27702					1.56097
	0.819714	2.26573	5.74557	1.52126	12.2007	6.55602	1.38148	1.89219	6.58016	0.473353	6.04694	2.30634					0.948593	2.48614	0.280313	5.24514	5.49649	0.588056	1.61672	11.3381	5.25604	1.2135	0.755066	0.247965					4.53309	2.87703	0.321629	0.342653	0.0380023	0.293538	1.04784	0.927392	1.19735	0.272004	2.03806	4.14065					1.20218
	1.18352	1.82874	3.55918	2.63336	10.4018	8.64276	1.07829	2.74759	5.70224	1.24702	5.4785	1.00037					0.643606	3.14122	0.383602	2.06673	3.2034	0.621876	0.848221	8.61967	5.79527	0.931913	0.855041	5.87039					6.90365	3.75545	5.11337	0.209404	0.0435157	0.183545	0.611075	1.67634	1.71251	0.480778	2.213	2.97163					0.839826
	1.93683	1.19203	5.40864	0.130231	13.1395	10.1198	0.789762	2.9418	5.94628	0.532413	4.04911	1.51597					0.158188	2.32965	0.763271	0.624755	4.89017	0.926287	0.25559	6.64897	5.30796	1.04988	1.33601	3.96202					4.40579	3.20784	11.2152	0.0203202	0.00670472	0.520205	0.827226	1.71877	0.383447	0.274957	1.7559	1.86544					0.584104
	2.36261	3.96133	6.57586	0.400156	10.5221	10.9037	0.339345	0.585015	5.82076	1.15598	3.08488	3.96071					0.107456	2.24299	0.622365	0.453651	7.52363	0.845078	0.454916	4.05752	4.63848	0.974418	0.991571	4.06925					3.01337	3.52807	17.1041	0.21314	0.119212	0.500882	0.731624	2.54159	0.662049	1.92398	1.87929	1.01915					1.04897
	2.02591	1.60962	6.11097	0.187232	12.6492	9.52928	1.24319	0.777049	5.2442	0.428766	3.07765	5.44177					0.637982	2.14341	0.108796	0.436995	10.1746	0.0150834	1.00907	4.11003	4.38377	4.03373	0.811558	3.20675					2.56596	3.38898	18.8628	0.273515	0.0223745	0.166329	0.465316	1.59689	0.537364	0.65979	2.8374	0.838498					1.2428
	3.40703	1.57102	7.82343	0.721002	10.7682	10.9422	1.14026	0.145026	4.06354	0.419443	3.36211	7.0139					0.430751	2.03251	0.779751	0.923183	6.49827	1.15721	0.770002	3.45757	2.06632	2.30511	0.65243	2.21052					2.50467	3.4263	21.809	0.232091	0.0757317	0.215148	0.330535	1.47149	1.10429	0.69456	3.26143	0.482227					1.53993
	3.72633	1.28281	5.91589	1.28376	12.7578	8.2066	0.604592	0.660801	3.89452	0.0444715	2.78452	8.30234					0.677869	1.66657	0.707161	0.344575	13.6276	1.43801	0.2375	2.34866	2.08737	1.71932	0.474554	1.2861					1.44851	3.26968	16.9784	0.0796676	0.0314824	0.190446	0.0799219	1.33208	1.80182	0.535545	3.01769	0.223778					1.17288
	5.50205	1.13374	4.63523	1.34565	9.64437	7.0018	0.588869	0.527613	4.27294	0.343531	1.32542	5.59842					0.963111	1.52957	0.281011	0.268619	16.7127	1.13814	0.0966145	1.84328	2.5355	0.742864	0.843336	0.693986					1.10168	2.81666	15.3186	0.123654	0.0465198	0.630602	0.753539	1.2731	1.58054	0.566543	3.1123	0.29169					1.03018
	5.92443	1.35551	4.79036	1.11987	9.53775	5.31608	0.66411	0.81774	5.87156	0.614464	0.983055	5.82891					1.08994	1.4864	0.162054	0.0930167	15.8854	0.654445	0.324871	1.22842	2.45558	2.60029	0.46732	0.0791102					0.694014	2.44252	13.4529	0.341602	0.0610547	0.421779	1.11683	0.931806	1.58293	0.949208	4.09497	0.372885					0.927853
	5.88413	1.63915	1.78248	1.32843	7.25235	3.15917	0.650421	1.36435	8.69438	0.0612749	0.916412	5.74931					1.04869	1.58638	0.196393	0.384127	17.5952	0.935797	0.644579	1.17325	3.40674	0.525892	0.594376	0.31778					0.779897	1.83099	12.0962	0.340038	0.0428408	0.717003	0.743768	0.657794	1.93041	0.528139	4.90642	0.290468					0.86276
	7.41798	0.994528	3.5705	3.94037	5.8616	2.29628	0.922466	0.698953	8.04905	0.45866	0.611493	7.11438					0.898992	1.20088	0.248088	0.709689	20.5836	1.83571	0.0786013	0.942676	3.94199	0.284225	0.796765	0.152831					1.04969	1.50781	12.2403	0.322278	0.0137945	1.47651	0.522796	0.355231	3.20953	0.450015	5.03833	0.307954					0.582661
	8.58077	0.851894	3.86689	2.65062	5.73203	1.34171	0.436547	0.130617	10.2585	0.767012	0.764367	7.08103					1.234	1.39417	1.11824	0.083181	16.0551	1.59584	0.473446	1.65619	5.6774	1.02498	0.983147	0.689882					0.6878	2.67741	11.5323	0.151672	0.0333249	2.02568	0.494388	1.25834	2.25342	0.206209	2.98629	0.346506					0.443619
	9.5429	0.559822	6.84651	4.00191	6.22287	1.68516	0.767113	0.382949	9.13119	0.625579	0.683356	6.24596					1.02729	3.19901	1.93542	0.523845	15.3436	1.86177	0.0275303	0.866192	6.30634	1.86426	1.45457	3.16113					0.991686	2.06022	10.5849	0.0573528	0.0392396	1.45199	0.44204	2.73491	2.04013	0.438191	2.05747	0.2856					0.270539
	10.2693	0.282469	3.65174	3.95832	2.34861	1.03286	0.561301	0.753028	8.52342	0.178119	1.08501	5.89664					1.19408	2.40898	2.38958	0.206308	16.7422	1.34223	0.128515	0.939183	4.29649	1.82568	2.78716	3.57594					0.956654	1.45542	14.9377	0.274967	0.0461502	1.43789	0.806497	1.87296	1.78258	1.58667	6.39599	0.23249					0.244857
	12.2241	2.59961	3.12142	3.70154	1.70255	0.933166	1.61574	0.58168	10.1973	0.441676	1.49593	5.94361					0.758824	3.16882	1.71407	0.104001	12.7326	1.49955	0.135445	0.839013	3.73166	2.68938	3.78225	3.74037					1.93041	2.32831	14.4343	0.44538	0.00389749	1.02552	1.44964	1.87533	1.40064	1.27018	4.17993	0.224074					0.106636
	11.7103	1.04258	6.82388	4.97823	2.94309	1.46465	0.762342	1.81809	7.45508	1.28069	3.89175	6.11636					0.463346	8.21108	0.97864	1.21747	17.0324	2.6225	0.184447	1.23082	2.23881	1.71019	4.16931	3.79389					2.51342	3.10403	15.7265	0.385847	0.156587	0.93857	0.503588	1.60494	1.9326	1.35776	3.57202	0.0702005					0.0314914
	12.4155	1.35718	1.67805	4.96787	2.79657	0.163032	0.796552	5.48475	5.7847	0.866324	4.58651	4.85129					1.04807	11.512	0.943876	1.75298	13.1816	2.36514	0.441146	1.33828	1.38763	1.00031	4.70745	3.14835					1.9188	2.93195	17.8165	0.364365	0.0474601	0.478392	0.0794569	1.48225	1.83889	1.54316	4.62485	0.0989181					0.0585138
	11.5631	1.22686	5.78768	8.60316	2.9063	1.46803	0.725214	2.28179	5.58672	1.14099	9.25356	4.0571					1.09415	10.8513	0.84279	3.51333	14.7253	2.95648	0.169224	1.59395	1.35518	0.856646	7.43317	3.20361					1.61778	3.13632	20.864	0.722517	0.0341146	1.14585	0.253838	1.11051	2.22024	0.912065	5.1265	0.0123441					0.315972
	12.6483	1.29269	3.19793	9.83399	2.51853	1.34764	0.224596	2.29335	4.10222	0.632038	10.1545	2.90644					0.78721	10.1352	0.644879	4.22249	9.41879	3.71749	0.126374	2.56008	2.39072	0.7555	7.76358	2.23132					2.39077	2.55695	21.9268	0.544516	0.0231482	1.37008	0.43688	0.934954	3.0007	0.665482	6.1361	0.0222542					0.170742
	12.2308	1.21321	0.986451	9.00262	2.42793	1.33821	0.713505	2.5427	3.68258	0.387432	8.71249	3.21508					1.84145	8.52703	1.1077	5.71046	7.51466	4.05196	0.548683	2.66944	2.39728	0.889876	9.85372	2.32222					2.55562	3.04694	20.0183	0.462296	0.0223403	1.55674	0.73326	0.529726	3.1715	0.704619	7.47936	0.774424					0.201295
	13.5044	1.35067	1.50728	9.29351	2.47202	0.536083	0.288754	3.35327	3.17755	0.533625	7.61218	1.54264					2.2063	9.92806	1.18345	6.86906	5.77604	2.94494	0.608191	2.88742	3.02264	0.914491	9.08556	1.64811					2.60877	3.02228	15.2696	0.631361	0.0757644	1.93834	0.100919	0.67458	3.38725	0.528897	7.7482	2.57923					0.146519
	11.7025	2.3922	5.81297	11.5088	1.28951	0.324234	1.10395	3.17379	6.37398	0.657807	9.20714	1.09998					2.69738	8.28684	1.31818	8.9525	5.55898	2.17865	0.301507	3.94554	4.37432	1.16834	7.59916	1.73093					3.13046	4.46158	12.4129	0.637374	0.046636	2.56852	0.46192	0.0934159	3.88491	0.911685	6.89691	2.59144					0.0648333
	11.2891	1.01889	4.48038	12.0438	1.31388	0.573642	0.217873	3.93585	7.23911	0.323055	8.49619	0.850766					3.24178	6.9602	1.73758	8.49459	6.90234	2.82532	0.417557	2.82451	6.091	1.3559	7.83122	1.63404					2.90395	4.96108	10.2357	0.717782	0.0459692	2.51792	0.647887	0.140939	3.12351	0.372087	7.46559	2.45315					0.0537321
	12.0803	0.921878	3.93699	12.5683	1.30979	1.55623	1.6328	4.62369	5.2358	0.409395	10.1549	0.85763					3.25865	6.51635	1.90103	8.58314	3.68992	3.30973	0.454099	4.69837	5.53236	1.27904	7.41152	0.89325					2.497	6.31669	6.15668	0.389515	0.0363228	2.53067	0.506237	0.26878	4.11213	0.220732	5.35076	1.84006					0.116126
	12.807	1.05686	3.6403	14.6593	1.65908	1.27791	1.40436	7.34023	1.45134	1.04171	10.4888	1.87365					3.20428	5.37667	1.65186	8.02253	2.44748	3.48712	0.159735	3.05367	6.0318	1.26534	6.40327	1.1476					1.92215	8.06321	4.5066	0.306843	0.00709111	2.18894	0.338686	0.450865	3.51294	0.39628	3.84054	2.056					0.085106
	12.6326	1.29218	3.30084	15.3451	2.21766	0.443837	0.877238	5.91374	1.51607	0.739738	10.319	0.994891					3.79493	5.27514	0.999596	4.53997	1.65664	3.18291	0.421758	2.46516	5.62929	0.853162	6.73755	1.5012					2.11316	8.49641	1.3471	0.362765	0.00628814	1.60746	0.295025	0.291047	3.13498	0.0950375	3.19298	1.6396					0.0129751
	8.57304	2.62549	2.95218	19.2006	0.894342	0.694264	0.6934	5.49112	1.3791	0.812642	11.0277	2.27801					2.75083	5.24382	0.494045	2.15824	1.79921	3.59299	0.830084	1.81793	5.90059	1.16747	7.72979	1.03702					2.28731	7.63462	1.23944	0.269976	0.0352958	1.05412	0.318601	0.43066	2.53797	0.0904448	2.12366	1.59364					0.132635
	7.78278	2.13834	1.95261	18.9161	0.917739	1.2709	0.325905	3.46705	2.29849	1.94337	13.4093	4.60586					2.3574	6.26327	0.942431	1.67458	2.41601	4.80599	0.340508	1.34899	7.8329	1.34552	7.25111	2.00112					3.60715	9.3654	1.17142	0.0989551	0.0251558	1.07282	0.247139	0.850501	2.20632	0.669179	1.9016	1.86722					0.106962
	7.54752	2.59673	2.11967	19.3399	1.18064	1.22106	0.79167	2.23622	6.82195	1.79235	15.0087	7.92067					2.08682	3.73035	2.55496	2.06482	1.1278	5.56464	0.18517	0.969532	9.12173	1.3815	7.83592	1.91					3.52804	8.44434	1.26744	0.106842	0.0277297	0.782564	0.604423	0.380905	2.00928	0.634271	1.32739	1.64431					0.041515
	4.32601	3.65043	2.10642	20.0475	0.593165	1.15432	1.0824	1.57407	5.54127	1.56131	18.9652	8.71261					1.6943	3.00223	2.25679	3.26041	0.473291	6.08372	0.259821	0.60915	8.94157	2.47382	9.88304	3.16298					2.89914	7.70758	1.78295	0.0626988	0.014925	1.03335	0.40076	0.445397	2.37954	0.338018	4.66805	1.15048					0.03263
	3.29246	6.82167	2.70739	23.9185	0.255289	0.865569	0.458178	2.74464	8.22972	1.33319	20.142	11.8894					3.72449	2.57407	0.694706	1.30395	0.299511	7.17202	0.20448	0.316482	9.77121	3.17329	12.6218	3.897					2.71343	5.82558	2.55658	0.0390096	0.0656605	1.53649	0.223089	0.533585	2.61473	0.123012	2.63309	0.600663					0.0761262
	2.68424	9.0302	1.90478	20.9268	0.721914	1.4711	0.610566	2.41727	9.32626	0.756682	23.4169	11.6774					2.12721	1.10124	2.41542	5.84272	2.74386	9.17711	0.32041	0.19926	10.0867	2.75203	10.9695	4.97021					3.16693	4.46399	3.20328	0.0264111	0.0256059	2.06373	0.332504	0.355815	2.38315	0.588115	4.23061	0.3838					0.0269673
	2.49372	11.9273	3.39668	18.9892	0.69399	1.84252	0.141503	2.51057	12.9618	0.177152	24.2317	11.5457					1.71623	0.802227	2.25885	3.92097	2.77343	7.92598	0.339416	0.322919	10.2924	1.91162	11.5991	6.93406					2.77796	3.58857	3.26558	0.0680882	0.0519539	1.82185	0.294396	0.612059	2.18305	0.412246	6.53657	0.341429					0.069018
	1.85506	11.6172	5.07463	20.5949	0.117705	1.59407	1.08563	1.93224	13.2558	0.844353	23.4994	8.37611					1.81619	0.835275	1.507	0.987442	3.11992	8.37184	0.211075	0.184984	9.58982	1.51011	11.5636	4.05983					2.49619	2.91974	2.8723	0.017389	0.0030086	1.86444	0.524204	0.624809	1.79192	0.290396	5.78196	0.365054					0.342128
	1.31721	12.5462	7.89383	18.153	0.653562	1.72593	1.21216	1.26684	16.8905	0.236939	23.3735	6.32474					1.1599	0.585354	1.81839	2.64964	4.1409	9.22011	0.456166	0.152201	7.48018	1.28417	9.26204	3.93154					2.95068	2.52095	3.56388	0.0566197	0.0363746	1.70878	0.857118	0.201248	1.01955	0.550812	8.92246	0.234224					0.0299597
	1.23843	12.3681	10.1396	17.3896	0.329721	1.35188	0.910922	3.70735	18.4555	0.675411	25.521	5.59323					1.49924	0.531185	1.10778	4.51723	5.34252	5.62847	0.332881	0.117416	8.8187	1.14656	8.20852	3.29882					2.37169	2.06536	0.997432	0.0925882	0.0394775	1.60539	2.85503	0.313449	0.295478	0.27016	5.00186	0.466848					0.132994
	0.629452	14.2214	9.52933	18.62	0.891341	1.29386	0.59828	1.87437	17.2132	0.705682	24.3883	3.99946					1.21778	1.17613	0.504801	0.978268	3.83954	4.20443	0.618046	0.232998	7.14581	0.839903	5.86437	3.33204					2.51712	2.8304	0.545887	0.0307573	0.0351993	1.70721	0.993594	0.261662	1.53797	0.477174	6.30155	0.942826					0.0770502
	0.502853	15.1962	12.6784	14.6803	1.97303	0.948893	0.615692	1.94754	13.6697	0.569957	26.0455	3.31339					1.61625	1.43822	1.44824	1.44313	5.70766	2.77117	0.705991	0.508941	5.54824	0.335689	4.14309	3.19029					2.66975	3.05965	2.46033	0.0508661	0.0155698	1.66164	1.45673	0.263977	4.91173	0.20851	8.5111	0.301142					0.0898779
	0.138472	14.8842	18.1946	14.3904	1.93256	0.819486	0.475848	0.998049	12.4442	1.14833	26.1492	5.21218					1.44927	1.4863	2.24314	2.78155	4.28255	1.73943	1.17916	0.473117	4.2576	1.043	3.34845	3.62172					2.18254	3.81009	4.96465	0.0387062	0.0355044	2.02989	2.6921	0.308603	8.40851	0.394072	7.58235	0.309513					0.147791
	0.247737	16.8406	20.0223	16.7434	0.654022	0.324322	1.55217	1.43956	15.5849	1.00146	22.4779	4.16057					1.42515	2.81499	2.29561	0.667245	4.21151	1.34111	2.53453	3.23564	2.9929	0.710503	2.7047	4.1456					3.07027	4.5604	8.71414	0.146376	0.084378	2.06343	2.67851	0.570601	10.8176	0.187348	11.4251	0.650513					0.0769762
	1.11817	17.7041	19.5151	14.5776	1.65417	0.592463	1.29142	0.877268	12.5208	0.593245	22.4888	2.65992					1.3499	1.84893	1.81905	1.32189	3.18087	0.235216	1.93134	2.4906	2.17441	0.938417	2.19715	3.13772					2.15486	6.36023	8.99257	0.0280072	0.0161148	2.4536	3.01729	0.229499	14.5805	0.126144	9.73387	0.475965					0.123538
	2.15803	15.9382	23.9108	13.76	1.62352	0.555482	0.87008	1.43209	15.7352	0.234934	21.6156	1.54325					3.31307	2.21472	0.824501	2.41483	3.08081	0.412235	4.17907	1.80031	0.941841	1.2059	1.9855	3.36272					1.79396	7.82884	11.7982	0.0316997	0.0869842	1.79821	0.947726	0.134396	16.8637	0.336961	9.46401	0.421965					0.0427803
	3.18745	17.8901	21.0654	14.585	1.96689	0.164486	0.477823	0.928395	14.5057	0.234272	18.3334	0.859401					1.76643	2.9302	0.29591	0.934085	3.35396	0.394133	3.78333	0.675458	0.216049	0.782806	2.48245	3.80073					2.5975	8.47001	13.1216	0.0195018	0.0432086	1.36247	1.08831	0.217651	16.1015	0.420229	9.21836	0.0758486					0.209739
	2.06531	17.9126	21.7558	12.627	1.82711	1.80885	0.981262	0.199895	12.7865	0.300975	18.1748	1.96396					1.63717	2.7621	1.18501	1.30958	2.92039	0.451737	4.34852	0.522331	0.381218	0.492156	2.20444	3.92887					3.19971	8.76382	11.3433	0.0113568	0.0215672	1.78947	1.22117	0.123692	15.0268	0.317077	12.1557	0.357734					0.396865
	1.46887	14.1276	17.3597	12.2365	2.14723	2.78269	0.303367	0.401548	13.3036	0.541689	15.1443	1.29866					1.20694	2.66379	1.15357	0.805432	4.96211	0.510238	5.40532	0.609825	2.27386	0.553655	1.75088	3.10948					1.98096	9.07598	12.6058	0.00868903	0.554005	1.28216	1.56436	0.125238	14.8101	0.345567	14.7287	0.835329					0.436147
	0.908099	14.3796	15.5364	10.5742	1.6762	2.87941	0.749638	0.280609	9.84389	1.33479	13.9859	1.6889					1.61507	1.98419	0.826812	0.915159	3.49543	0.236431	6.34309	0.503414	1.79567	0.614304	0.933756	4.07563					1.61932	8.63615	12.4738	0.0322281	1.27062	1.36465	1.46873	0.105149	12.329	0.393144	14.3209	0.650111					0.430884
	0.686482	11.2505	12.6592	12.6403	1.13706	2.44143	0.536532	0.111284	8.95065	0.534709	12.7606	1.61124					1.01286	2.06651	0.317371	2.44658	3.8472	1.07167	7.46769	0.419168	1.79788	0.524898	0.805133	3.4113					1.32482	9.13312	11.753	0.0222567	1.20406	1.89936	1.2456	0.265046	8.82743	0.373138	20.3656	0.831244					0.138824
	0.284846	9.08204	13.4785	11.4888	0.482065	2.04143	0.098206	0.556949	6.633	0.514178	9.64821	1.34766					1.07916	1.61524	0.609122	0.666546	2.97045	0.369739	8.17037	0.397262	0.364097	0.292522	0.813281	3.31335					0.85092	11.2915	12.5893	0.0039474	1.248	1.61068	1.40041	0.167064	4.68915	0.39198	14.3529	0.907716					0.518419
	0.34603	9.52594	10.0467	10.1384	0.68815	1.92214	0.266982	0.248373	7.12537	0.267346	8.05922	3.21207					0.509491	1.28223	1.17042	0.894273	2.23338	0.513336	8.67388	0.362085	0.917886	0.429991	1.79877	2.97936					0.936342	10.4405	13.69	0.0320959	1.09404	1.417	1.66666	0.113195	3.42889	0.492998	15.0924	0.694703					0.345115
	0.293088	8.90694	13.1858	9.92076	0.179409	0.886332	0.831935	0.35959	5.94388	0.108983	8.00806	2.72261					0.0517983	1.08254	1.08574	1.32349	1.58887	0.540908	9.47525	0.155385	1.91037	0.342653	2.69139	1.21274					1.297	12.6955	12.265	0.0263813	1.73975	1.28759	1.7417	0.160101	2.11304	0.200945	17.4184	0.708173					0.181513
	1.01814	8.85723	9.48112	9.26545	1.38406	1.86299	0.882293	0.164359	4.59634	0.576595	7.44132	2.90034					0.233162	0.979148	0.834731	0.421937	1.53078	0.791775	10.8071	0.378972	0.389653	0.290378	4.81636	1.2134					1.41326	11.8049	11.7885	0.0121401	2.74048	1.10245	2.16829	0.942933	0.469257	0.556649	17.7398	0.523935					0.20023
	3.41734	9.65504	6.33628	6.823	2.73068	6.26231	1.52294	0.912057	6.3258	1.74719	5.18449	3.4953					0.232446	1.45184	0.344849	1.13589	2.82282	1.22306	10.6694	0.0797751	0.120396	0.301316	7.63249	1.14459					1.60508	11.4248	9.00816	0.0542734	2.51596	0.525729	3.465	1.48732	1.31351	0.771484	15.8254	0.461392					0.132133
	0.292014	8.93171	3.81646	7.6301	5.87404	6.78898	0.976748	0.736866	4.2631	0.59721	6.08885	4.45534					0.0699626	1.14994	1.01568	4.81562	4.10007	1.52385	10.0321	0.0740222	2.3157	0.0611046	10.0915	5.52416					1.19705	8.92572	6.62	0.0176892	2.84578	0.770299	2.43184	1.75683	1.62748	0.850325	13.8084	0.242075					0.0583636
	0.681807	8.8569	1.76674	5.89629	8.59558	9.87614	0.437003	0.275493	3.44595	1.13414	2.03758	3.92147					0.262539	0.942212	1.67431	0.622271	3.08847	2.0538	9.29118	0.61784	4.09734	0.0751452	10.3732	6.58135					0.888101	8.26103	5.61067	0.00834645	3.69617	1.76045	2.54705	1.36147	0.885119	0.861283	15.7132	0.490922					0.0655225
	0.571657	7.94485	1.2784	4.99435	10.2807	12.3742	0.638288	3.30673	3.38184	1.7473	2.6025	4.60705					0.433534	0.85425	1.05863	1.23453	2.41496	4.39387	9.96262	0.122642	5.12514	0.218278	8.34871	9.602					0.629942	8.00045	3.49437	0.043829	3.03696	1.85729	3.25753	1.03609	1.39345	1.5819	15.9877	0.481598					0.0254417
	0.635565	7.25778	1.3969	4.38645	10.0627	9.19934	0.806296	1.62669	2.76334	1.70377	0.650074	3.70447					0.312462	0.75016	0.757008	1.11202	2.88412	3.54424	9.58507	0.173262	6.48493	0.0585784	7.26184	8.4572					0.421297	7.87037	2.38196	0.0122826	1.90431	1.51887	1.60768	0.811741	1.55231	1.13383	12.7608	0.310677					0.103006
	1.89804	5.74888	1.66106	3.70374	14.4242	8.89925	1.15904	1.99113	2.36513	0.989839	3.04922	3.28337					0.308904	0.767811	0.880558	0.583083	2.84643	4.85952	10.1778	0.247791	7.71292	0.0418496	7.23165	7.41759					1.00528	7.96621	1.68604	0.0139545	0.169858	1.38723	1.40654	0.628999	2.2306	1.08327	11.8416	0.193038					0.138816
	2.15388	3.82559	1.86585	2.22213	12.4844	7.01124	1.59972	2.03135	4.11056	2.34749	2.99408	3.22126					0.733081	0.550075	1.22659	0.895718	2.1434	4.58118	9.74598	0.501798	7.07495	0.0562621	7.72884	5.80194					1.758	9.88251	1.32055	0.0271009	1.65585	1.64676	1.41045	0.488755	3.22912	1.21301	12.177	0.134156					0.168693
	1.85046	0.995148	1.75072	1.9022	12.6983	6.4391	0.786605	1.57475	3.2971	2.96002	3.09705	2.60297					1.03433	1.316	0.989178	5.29988	1.79375	3.98126	7.21479	1.42933	9.76375	0.00976273	8.32721	4.16638					1.74467	9.35123	0.928539	0.0130453	2.10584	2.19832	1.8566	0.426148	4.36412	1.21509	12.6505	0.146682					0.140434
	2.4529	1.9838	2.11174	0.800619	11.3784	6.36309	0.459345	1.28947	5.55731	2.43783	4.41829	3.02497					0.892499	0.717969	0.582685	4.57309	1.92095	6.0044	7.55767	1.06348	9.98314	0.0651795	8.32729	3.31877					1.93189	13.173	0.319888	0.0168999	2.73666	1.5141	2.10305	0.44089	5.32922	1.45026	9.19148	0.173753					0.0210253
	2.60772	2.70955	1.2487	0.223104	8.39188	5.99984	0.727326	1.83475	3.82321	1.55554	4.90942	1.51426					3.47172	0.427562	0.671713	4.77474	1.80007	4.33037	3.71403	1.1639	11.5469	0.0517483	8.8366	2.63454					1.51355	14.048	0.0331975	0.0249642	2.96254	0.966962	1.72193	0.388321	8.02387	1.17031	7.64506	0.0145308					0.0682647
	2.66119	2.84478	1.08992	0.560292	7.26108	5.4026	0.578282	1.2833	3.9335	1.49189	5.28897	0.855302					2.60229	0.369897	0.631233	0.759078	0.772235	3.43594	1.20193	4.04749	11.0047	0.0959383	8.9088	1.3736					0.685388	13.3738	0.978529	0.0134998	3.01192	1.31359	1.69106	0.237882	8.82324	0.746913	7.09382	0.065078					0.0983509
	4.67047	3.33467	0.205043	1.05255	7.59393	6.1338	1.55296	1.55483	4.14719	1.57004	5.74344	0.674911					2.17917	0.327581	1.10305	4.75781	0.969485	3.13761	4.46757	2.16067	9.65875	0.0594955	7.27199	0.537899					0.860849	11.2512	2.33359	0.0226121	2.10502	2.83652	1.8291	0.225305	10.4775	1.23947	6.1234	0.052607					0.191129
	3.6591	3.08767	0.172727	1.20747	5.14682	7.36574	1.32933	1.09885	5.45934	2.01561	6.40508	0.343107					2.16634	0.0790926	1.31357	5.73738	2.61427	3.00929	6.59237	1.91776	11.0566	0.0862994	5.15916	0.524237					1.38256	8.26594	1.10012	0.0631659	1.58716	3.20519	1.7651	0.232697	12.6817	1.41258	6.89187	0.247074					0.120185
	1.56373	3.71839	0.424858	0.570845	3.54251	7.37348	0.745314	1.51796	2.76925	1.88285	6.62242	0.12386					1.54478	0.152185	0.970204	1.003	1.60897	1.85134	6.72185	1.00146	9.11993	0.113769	3.62506	1.12467					0.950409	5.42003	2.32697	0.0543504	1.02037	3.81756	1.84231	0.259512	14.0325	1.69109	8.1975	0.123132					0.0962454
	1.65651	3.40458	0.448113	0.530105	3.25322	10.0049	0.552196	0.708763	1.69562	0.826323	5.0792	0.2168					1.51046	0.114474	1.21737	0.733031	1.15226	1.94133	8.4084	0.889013	8.87878	0.0462029	4.7502	3.54324					2.11677	3.59233	5.77344	0.0528052	1.24141	4.12287	0.96346	0.313096	17.3616	2.51189	2.72432	0.056636					0.0840212
	5.56044	3.64246	0.290244	0.905405	3.02907	8.28464	0.318204	1.13092	1.5104	0.902485	5.84632	0.969881					1.75533	0.286929	0.97485	4.29978	1.19645	1.25175	8.49222	3.05247	7.20167	0.073784	4.07078	3.80862					1.18905	1.34557	5.08457	0.0373042	1.28731	3.65741	0.572861	0.203832	17.7735	1.93689	4.71057	0.0368383					0.0723202
	4.7611	3.57436	0.623379	0.913027	2.34505	9.53289	0.173885	1.46489	1.81031	1.36786	4.04917	1.05372					1.72308	0.145862	1.33129	2.648	2.36108	1.03136	6.32605	2.16618	5.23736	0.0571149	2.57472	6.33371					2.03317	0.920399	6.38787	0.0144466	0.909182	3.97169	1.65662	0.363036	21.4464	1.41384	3.03928	0.043787					0.0336381
	4.85976	2.97219	0.230708	0.687467	2.53074	9.13592	0.565752	0.729096	0.968928	1.02516	6.58867	1.4599					1.77922	0.178677	1.19231	1.8579	3.0611	0.791306	5.49956	1.45073	4.26972	0.052904	1.86042	8.3501					4.02743	2.41846	9.46302	0.0412889	0.865528	3.139	2.32458	0.244002	22.6522	1.25568	2.67704	0.00883469					0.0837048
	1.16637	2.1289	0.116859	0.793207	1.76252	9.22619	1.11599	1.05343	3.18646	0.51808	3.01357	2.12248					4.8106	0.123274	1.21504	1.50134	3.61044	0.181104	5.57111	0.882124	3.41841	0.0917593	2.67475	7.05559					4.17494	2.83147	11.4153	0.0141395	1.35626	2.17995	2.49754	0.532302	22.509	1.28124	2.33686	0.0127739					0.0885889
	6.24113	1.88379	0.084792	1.71999	1.3822	6.97929	0.773521	3.36795	1.81382	0.944169	2.39303	4.46042					3.23781	0.177302	1.49604	1.25472	5.13918	0.100315	5.35647	2.42117	4.9793	0.123417	1.82908	7.18757					4.73922	2.45667	10.5706	0.0324698	1.73446	1.25279	2.52979	0.609184	22.9201	0.888327	1.76547	0.0298727					0.227166
	1.71734	1.45004	0.673037	2.56312	2.73223	4.57109	0.273854	2.92228	1.81059	1.28653	1.98711	4.10468					2.79827	0.121714	1.21265	1.37054	5.464	0.047432	4.97974	3.11832	6.81543	0.464132	1.60335	8.84332					5.68661	2.18884	10.8635	0.00310575	1.59066	0.776027	4.65646	0.159939	20.2513	0.722939	2.08361	0.0521283					0.0180399
	1.37146	1.00329	0.610694	4.08196	3.37184	2.40179	1.80239	4.67195	1.67848	0.94965	1.30623	3.89567					3.53696	0.11036	0.553933	1.42133	6.47032	0.45474	6.09628	1.39292	7.51957	0.333286	1.45032	9.80614					10.0872	1.99693	9.75512	0.00718702	1.55057	0.359018	4.28552	0.357297	18.2044	0.62834	3.12661	0.0345413					0.125842
	4.0323	0.809575	0.297706	4.65123	4.91921	0.564288	1.04016	3.37303	3.35199	0.647483	1.22303	3.57989					3.15415	0.00397287	0.494565	1.30564	5.88594	0.180673	7.18057	1.27897	7.51871	0.870503	2.27994	13.386					8.92014	2.18479	11.5839	0.0347095	1.72865	0.279781	7.07552	0.255781	15.487	7.03046	2.70446	0.010563					0.0213795
	4.87781	1.00603	0.450229	5.81982	7.1215	0.355624	0.494807	3.56428	5.73709	0.817058	1.27966	2.91648					2.54761	0.0941473	0.163638	0.458225	5.89709	0.336787	7.14194	1.61952	8.38891	0.516325	2.35053	14.5067					11.7862	2.28289	9.9325	0.0208656	1.84661	0.52445	5.12913	0.159171	13.2575	5.52294	3.13848	0.0462572					0.0279352
	1.04153	0.57405	0.210568	3.46287	8.13917	0.794512	0.0648365	3.21206	3.69686	1.43153	0.631743	2.46655					2.04447	0.127973	0.806012	0.384973	5.39632	0.54964	6.71099	3.30755	7.59505	1.0294	1.99049	14.7547					9.77903	2.49578	7.86551	0.0566343	2.22558	1.36101	4.40481	0.296808	14.8671	1.01748	4.12604	0.0785148					0.014861
	0.894667	0.206478	0.262146	5.53542	11.6151	1.17151	0.479758	3.17749	2.87274	2.08742	0.276552	1.86936					1.21511	0.0754002	1.3303	1.86342	4.97952	0.53706	4.95883	2.06612	7.38366	0.497438	3.58612	16.8487					9.75575	2.49604	9.64394	0.0165022	2.92089	1.84299	3.55885	0.23391	13.4823	0.986721	3.02807	0.093618					0.05464
	0.964532	0.530036	0.195811	5.48496	10.4101	1.74058	0.907669	2.63635	2.27256	1.47616	0.277081	1.47053					0.850159	0.0579651	2.38782	2.73511	5.5629	0.119514	3.53661	2.4313	6.31431	0.998062	1.98416	18.1459					7.68082	1.95746	6.94535	0.0550067	3.62347	1.86564	3.57782	0.793666	12.3328	6.37937	2.78157	0.0202153					0.0732202
	0.535873	0.21571	0.421842	5.10501	10.222	2.53971	1.16373	2.81989	1.79681	0.895644	0.971372	0.914175					0.54963	0.0249397	2.68002	5.15059	5.9547	0.0442552	3.40801	6.08184	5.13885	0.792975	1.30001	21.9308					7.38094	2.07442	6.37565	0.0244322	5.08451	2.44366	7.26875	0.889437	8.93754	1.39505	1.91643	0.0415464					0.0175033
	0.605497	0.317588	0.207433	4.63054	5.97929	2.45399	1.6795	2.11182	1.43089	0.703719	1.2424	1.06741					0.388673	0.037585	3.27747	4.83501	6.30761	0.251017	2.42675	3.48498	4.05588	0.259359	1.3593	21.1762					8.00127	3.43682	5.59974	0.016567	6.60304	2.32774	6.66235	0.563519	6.98818	1.43759	0.796235	0.0259407					0.0331308
	1.59485	0.200669	0.232	3.23791	7.68969	2.33157	0.225999	2.25104	1.34306	0.569025	1.07474	1.01494					0.201175	0.0868762	3.54865	11.2624	5.84313	0.400679	1.58859	3.05632	3.79367	1.28131	1.72124	19.4915					8.76889	2.56975	4.48179	0.0525312	6.50966	1.89338	2.03002	0.440277	5.72379	1.36513	0.672551	0.0317296					0.0177526
	1.35854	0.209401	0.248467	1.67246	9.80896	2.15788	1.21373	1.26434	0.920949	1.18869	0.479672	0.886328					0.183049	0.00855062	1.40956	8.96888	5.79855	0.480903	1.70246	2.9178	4.58375	1.42419	1.7802	21.705					10.5425	3.26706	3.75277	0.0271083	6.31137	1.69654	2.27822	0.881834	2.71666	1.44091	1.31787	0.0441022					0.249643
	0.987277	0.420912	0.104439	1.79001	11.8019	2.21139	1.00824	0.762765	0.542369	1.43212	1.5327	0.20174					0.209408	0.048114	0.395682	5.40365	4.0734	0.0711387	0.794497	2.53133	6.17741	1.06596	2.15762	18.845					9.4177	2.89982	2.69269	0.0361893	6.40645	1.36171	2.24982	0.352784	0.319498	1.42864	1.49689	0.033216					0.0478808
	0.500548	0.526606	0.0308335	1.32024	12.1925	2.21149	0.87556	0.443128	0.503298	0.876994	3.52329	3.01116					0.471511	0.0887686	0.719581	6.75697	3.9245	0.0989126	0.611054	2.12756	6.79292	0.75704	2.19283	18.9142					10.6049	3.81216	1.51862	0.0411093	8.01615	2.07627	1.62552	0.55313	1.1591	1.40076	2.57042	0.0247711					0.0199984
	1.89805	0.366061	0.161334	1.65962	15.4787	2.38966	0.591088	1.11177	5.98799	0.967556	6.90252	5.5991					0.270428	0.068344	1.42376	3.91879	4.25467	0.11201	0.404647	1.35891	8.85407	2.32657	2.84869	16.5261					11.8812	4.39067	1.38286	0.00893084	7.08689	1.28223	1.56382	0.525242	1.31327	1.10373	3.8645	0.0452599					0.0628155
	2.59708	0.373902	0.339228	0.954075	15.956	1.8659	0.490423	0.974205	9.32112	0.849079	9.80351	8.83207					0.309096	0.0840973	2.49722	3.07242	5.46679	0.0954498	1.7914	0.851657	7.30406	4.54973	3.09993	16.4215					10.2736	3.76722	1.23181	0.0617879	6.45946	0.975795	1.77535	0.443944	2.73083	0.936995	4.51946	0.0981127					0.0381485
	3.48081	0.62799	0.358061	0.918279	15.8302	3.33973	0.871828	0.794621	10.011	0.147735	14.0534	12.6984					0.496675	0.121055	1.7699	1.62045	5.03092	0.522842	1.03876	0.652918	7.23271	8.72561	2.69599	13.9311					8.71297	4.13427	0.884098	0.0252122	5.68645	0.66975	1.28098	0.505556	6.15658	0.885899	6.63531	1.12166					0.0834527
	4.02295	0.0832578	0.233072	0.697784	13.3338	3.39738	0.878654	0.415844	9.73809	0.659121	13.9658	17.3822					0.475174	0.0967212	1.57386	1.38374	3.65908	0.397589	1.56954	0.67508	9.415	11.9774	3.3889	12.0658					8.56097	5.11351	1.81323	0.0710925	5.40621	1.99916	0.814448	1.01809	4.1394	0.799052	5.08064	0.999373					0.074546
	3.16904	0.27614	0.673211	0.501574	8.68937	3.44906	0.54144	0.239407	9.86172	0.496324	14.658	20.2233					0.354228	0.0181826	1.0303	0.695514	2.68821	0.331631	1.34462	0.720364	8.23599	16.9796	3.53407	11.6467					8.05204	6.61616	1.42732	0.0237463	4.3346	1.85209	0.604349	0.76497	4.09023	0.385585	5.31994	0.97016					0.0434123
	3.56418	0.418988	0.617166	0.56793	7.5469	3.99547	0.227282	2.41182	8.58511	0.26426	15.4674	22.5821					0.572506	0.134274	0.408769	4.0515	3.44502	0.200267	2.04987	0.646486	8.03937	18.6166	3.17703	10.288					6.95498	7.25413	1.46364	0.505643	4.62781	2.82605	0.315114	1.1125	3.53073	1.37125	7.26811	0.676796					0.0332364
	2.16352	0.247673	0.462135	0.245455	7.38973	4.26457	1.09505	0.790249	9.60714	0.435272	15.0314	25.4446					0.299993	0.125772	0.144305	2.07125	4.46781	0.146476	4.40742	0.887419	8.25251	20.072	4.35897	12.7106					6.48187	8.17371	1.20853	0.592484	4.1413	2.6774	0.258771	0.62413	2.98438	2.25732	6.64498	0.597289					0.0593952
	1.11681	0.431599	0.506431	0.446301	7.92952	4.752	1.63916	0.585851	9.63937	0.390008	11.4107	25.0558					3.29047	0.117279	1.06089	1.99183	5.25789	0.181428	2.2856	0.738552	7.63875	21.4119	4.2588	10.3555					8.22109	8.83348	0.931164	0.354767	3.61521	2.14817	0.110358	0.579241	3.17298	5.17171	8.18891	0.891367					0.0388696
	1.49784	0.347385	1.20566	1.34505	7.39979	6.45619	1.56586	1.11315	9.63064	0.517589	11.6031	22.0365					2.00694	0.117546	1.05456	1.40343	4.26967	0.199417	1.97498	0.627288	5.37738	19.4965	5.83686	11.7747					7.96744	7.8026	1.06021	0.303045	3.38387	1.9897	0.0618969	0.439482	2.8053	4.08183	4.97104	1.76524					0.0109118
	1.78697	0.112269	4.02161	0.4172	5.53498	7.38308	0.604725	0.613562	8.9223	0.390622	10.2741	20.1723					1.08382	0.0354255	0.588998	1.82107	4.30306	0.117163	3.01341	0.859441	5.92149	18.0061	5.77059	11.1028					8.09491	5.82301	0.981665	0.791427	2.02794	2.01735	0.198895	0.472266	2.52412	3.11235	4.83381	2.26509					0.0440386
	0.322956	0.195864	4.08951	1.08208	3.99254	8.08566	0.540204	0.447197	8.31093	0.349586	8.37011	23.0165					1.17399	0.10024	0.544726	1.28885	3.80973	0.117456	3.44136	0.839054	5.97255	18.0597	10.3347	9.44727					9.40486	5.37474	0.838581	0.520078	1.08609	1.91181	0.362306	0.292807	2.50088	2.50587	7.30951	2.03157					0.044687
	1.16812	0.259839	3.13342	0.276223	4.35748	12.5385	0.598601	0.675274	8.38611	0.0847394	5.89395	23.7914					2.15825	0.0440014	0.454564	1.63347	4.44469	0.114139	3.86712	0.864317	4.90017	16.8398	6.14742	9.76012					9.61158	4.09293	2.97708	0.522368	0.878822	0.770119	0.902381	0.646126	3.10353	2.26712	6.78216	1.69502					0.127072
	1.27369	0.191781	3.84084	0.313283	2.18502	11.4524	0.565843	0.851361	10.8873	0.176484	3.77909	23.4997					1.60518	0.146192	0.83516	1.62766	6.48647	0.13015	4.14251	0.530859	4.44876	15.1359	4.49817	9.54845					10.5634	3.26576	1.58849	0.607127	1.82133	0.8007	2.35622	0.355065	2.28438	1.67154	3.06219	1.70076					0.0493039
	2.15973	0.164941	4.61464	0.175515	1.73274	9.74616	0.813714	1.33272	10.7183	0.473219	1.94362	25.3149					1.30218	0.0618387	0.376512	1.72046	6.09105	0.218682	4.68501	0.827757	3.43864	13.6538	4.28732	7.24328					10.5524	1.98518	1.27138	0.463484	2.2189	1.02623	2.35915	0.227187	1.9246	0.284555	3.5025	1.98064					0.0133316
	1.91306	0.340869	6.23414	0.218395	1.26659	6.457	1.48658	1.00871	10.8866	0.223921	4.62945	23.3557					1.12344	0.00875289	0.285927	3.21716	4.92311	1.901	5.41795	4.09595	4.66505	15.6164	3.21827	15.5294					10.1514	0.820831	1.38749	0.531257	2.59593	0.579768	3.07694	0.611416	1.99569	2.35123	3.23763	2.30151					0.00592429
	0.719582	0.358641	8.85334	0.251914	2.82839	5.13971	1.49423	2.19149	11.7178	1.31932	1.97198	24.6919					1.12924	0.646552	1.22998	4.89563	5.4541	2.13168	5.49904	5.5636	5.68116	14.1679	1.39152	11.0671					8.72746	3.46478	2.08539	0.403914	3.18356	0.370138	1.97208	1.38264	1.86358	3.53582	3.42074	2.48349					0.037821
	0.767229	0.816037	9.57977	0.150897	0.60562	3.67314	0.80636	3.89113	14.1857	0.891059	1.14824	22.5936					0.501247	0.258946	3.46051	5.12905	5.49947	2.20997	7.08091	5.28521	7.58743	12.7103	0.961668	12.0832					7.67235	1.98763	1.18103	0.248004	3.00631	0.670385	1.99843	1.50486	1.70451	2.491	4.09695	3.10286					0.0184517
	0.428407	0.491863	10.4195	0.324258	0.99514	2.36468	0.142799	4.29804	14.9766	0.982481	0.76259	23.0239					0.415001	1.22634	2.90663	4.90962	5.21154	0.528552	7.49949	5.85364	5.18213	12.2819	0.804615	12.8092					6.7691	1.27261	0.922221	0.58539	2.36931	0.838837	2.19048	1.47461	1.17996	2.61945	7.58759	3.44588					0.0122795
	1.02214	1.0866	10.0682	0.0784616	1.34872	0.79032	1.15348	6.0641	19.0051	0.466807	0.469732	17.7837					0.451768	1.15414	3.668	5.42932	5.51671	0.80896	8.05986	6.21731	4.47862	12.2504	2.41662	12.9823					6.912	0.991957	0.690876	0.852774	1.75157	1.16271	2.15028	1.17867	1.49942	2.3877	1.04464	4.10894					0.043946
	0.900642	0.477102	9.58394	0.384921	0.828422	0.226872	1.56151	4.54958	17.8819	0.237029	0.665687	19.5397					0.213719	2.54249	2.27815	5.23383	7.59119	0.792841	7.79191	6.57005	5.77629	12.242	6.99892	13.2608					9.18377	2.17548	0.553557	0.802442	1.736	1.26325	1.26476	0.893534	1.33007	1.70815	2.58752	4.44036					0.0609936
	0.934669	0.0562738	12.8594	0.707805	1.04142	0.818684	1.63473	5.38886	21.7201	0.253776	0.901049	15.5713					0.629878	2.27053	1.67013	5.35987	5.29392	0.713316	6.23033	7.61051	9.09844	12.2369	5.40516	12.6809					7.64416	1.74059	0.409541	1.09203	1.68836	0.221684	1.19286	1.27375	1.86439	1.69082	5.46243	4.34272					0.0235156
	3.85402	1.00749	10.6769	0.363629	0.710351	1.88513	0.715352	4.91451	20.9477	0.492338	2.89804	11.5696					4.41074	2.15467	1.58162	6.25269	5.38854	0.671272	6.09573	6.77788	8.4425	10.9193	7.39424	11.1756					5.82698	1.54737	0.341055	0.887872	1.76571	1.27851	1.10662	0.935093	1.42749	1.24694	6.48928	4.16508					0.0298828
	3.39314	0.591639	12.4319	0.356855	0.775786	1.15416	0.766745	4.52654	21.8466	0.114305	1.62357	9.75616					2.66838	2.10267	1.62567	6.51912	5.72118	2.04568	5.08751	5.83143	10.4837	11.228	10.4812	11.0108					5.16942	2.05816	0.413667	1.28665	2.36262	2.11842	0.98064	0.690494	1.40225	0.638445	6.46677	3.56989					0.014727
	7.20645	0.447245	11.9634	0.338176	1.09722	1.16361	0.553674	3.52778	22.4946	0.709941	1.00933	13.0368					1.45747	2.34357	1.67012	7.01653	5.35634	2.21785	3.97261	4.82061	10.0998	9.50653	12.2845	10.1938					4.67153	1.72247	0.338487	1.94317	3.73916	2.3958	0.682951	0.565243	1.31166	0.0973908	7.92403	3.13228					0.0509066
	7.48038	0.75345	12.5949	0.436759	0.948719	0.963131	0.558462	3.3017	22.1979	0.962845	0.747443	6.41544					2.15438	1.9281	2.5111	9.68197	4.93876	1.8138	3.07155	4.36097	8.51011	9.11157	11.6542	9.13739					4.47731	1.83979	0.102551	0.654174	5.44814	1.67549	0.506466	0.0821855	1.48406	0.548296	5.79815	3.06496					0.0590712
	7.94375	0.557864	16.654	0.471198	0.0426191	2.92917	0.482683	2.23168	21.7292	0.894783	0.911045	4.91323					1.43187	1.51527	2.28448	12.6775	4.22917	2.09735	0.454167	3.17381	8.30771	10.0266	9.51542	5.79676					3.98066	1.63661	0.0763784	0.266658	7.44797	1.2825	0.520536	0.367184	1.25834	0.814135	4.01184	2.34967					0.00563082
	6.63173	0.0526634	15.1442	0.505837	0.553747	4.24628	0.475787	2.35328	21.3688	1.03638	0.117568	3.86291					1.32309	1.81629	1.91326	13.3996	3.34354	1.27324	1.29477	2.11747	6.50706	9.77695	6.6367	1.80961					3.65491	2.35893	0.0505607	0.737565	8.24194	1.65527	0.64921	0.177645	3.77917	1.06745	4.17603	1.54422					0.0767033
	7.74046	0.761684	22.4519	0.73106	0.626877	5.72427	0.496556	2.10761	20.5793	1.46044	0.166044	2.2473					1.12273	2.29299	2.83458	14.2629	3.29612	1.17919	3.12249	1.51092	6.31715	10.643	7.4942	1.38834					3.28546	3.40792	0.120334	0.618565	8.2229	2.54131	0.568002	0.116016	7.60634	1.34868	3.77449	0.845055					0.0364136
	7.06989	0.127767	15.9575	0.402258	1.68952	6.84265	1.46575	2.3955	20.9884	0.158748	0.415653	1.69996					0.791165	2.29306	4.01303	15.5524	2.36087	0.693915	4.10683	0.948861	5.51806	10.7138	8.74544	1.594					2.82466	3.9162	0.130926	1.2181	8.77376	2.713	0.478764	0.375223	8.61183	1.04607	3.25796	0.861784					0.0229472
	7.62451	0.266238	14.6809	0.224412	1.53302	8.41016	1.19706	1.71111	19.7939	1.15658	0.337348	2.81891					0.435412	2.35849	2.90173	14.4221	4.43809	0.200917	3.96944	1.58534	3.82352	8.47807	8.3768	2.82406					1.9301	4.63046	0.106562	1.11118	9.5208	2.59344	1.09636	0.480565	10.4927	0.813984	2.05503	0.310312					0.0601345
	7.75675	0.134078	11.8986	0.506576	0.667851	5.22443	0.571283	1.46268	18.8815	0.918332	3.57206	3.75138					0.283672	2.48624	3.07185	17.091	2.67806	0.516029	3.03922	0.882933	3.48902	7.17517	9.72473	2.54946					1.33814	5.97345	0.122083	0.45965	8.02842	2.1351	1.14135	0.378893	10.1631	0.66412	1.84827	0.64355					0.0871343
	11.5091	0.307529	10.3674	0.442154	0.506579	5.63562	0.246885	1.25569	17.4389	1.77959	0.827316	3.32162					0.130883	3.14624	4.14234	17.7711	1.98817	0.206261	2.97108	3.61422	5.04668	6.3281	9.58966	3.50547					1.34808	5.98515	0.103629	0.451339	6.05932	2.44989	1.52387	0.530546	7.78754	0.432079	0.724126	1.09255					0.0264782
	16.4204	0.251103	9.81727	0.684332	0.40181	6.53716	0.867408	0.900229	18.2526	1.20095	0.968809	3.58231					0.135789	3.1684	2.54501	17.1692	1.69922	0.465041	1.93086	2.79711	2.98384	3.64317	7.25503	2.80151					1.31794	6.43414	0.0484204	0.48279	5.75453	2.57276	1.17466	0.315236	6.61434	0.346177	0.102552	1.67212					0.0271635
	14.0509	0.238831	7.5436	0.487643	0.478314	5.83592	1.37002	1.09674	16.5844	0.674597	1.26742	3.1821					1.01294	3.49572	2.16255	16.9891	1.77132	0.480703	2.84699	3.42296	3.02655	1.17362	6.22588	1.3865					1.41412	6.28172	0.19903	0.66952	4.66302	3.5095	1.25827	0.422867	5.34486	0.227002	0.74076	2.88843					0.147411
	13.276	0.0927774	5.81078	0.308236	0.58739	3.60024	0.327191	0.882842	17.3281	0.544662	1.31678	2.794					0.020496	5.46928	1.36725	17.6427	2.23867	0.453483	1.96415	5.3484	4.13545	0.445408	4.89555	2.00145					1.26199	4.91323	0.0706203	0.758389	4.28119	3.57728	1.89828	0.357412	4.03857	0.0879619	0.51081	3.55221					0.0205843
	11.4382	0.18492	6.41147	0.498744	0.198394	2.59071	1.16457	0.970949	12.594	0.348558	1.56886	2.47437					0.172674	4.87515	0.965055	16.2909	4.36855	0.352264	1.92128	6.48242	3.47708	0.364971	3.79576	3.81938					0.652417	3.28195	0.169724	1.33955	3.50839	4.29571	1.96808	0.317099	2.88247	0.06735	0.566404	6.60026					0.0431162
	9.2584	0.494345	3.7331	0.475377	0.902163	1.6071	0.182925	0.983804	14.5572	0.200926	1.68499	2.00933					0.194784	5.27627	0.518188	13.887	10.0897	0.0852578	1.7715	9.53028	5.52693	1.01988	3.08999	4.24948					1.12659	0.506785	0.0811082	1.76749	2.13523	2.68129	1.44926	0.401066	3.4811	0.0780425	0.936269	9.19948					0.029559
	9.74941	0.177557	2.25292	0.619421	0.686788	1.80822	0.130349	1.01156	15.0689	0.3304	1.74333	1.30377					0.0278866	4.90078	1.88952	11.9034	11.6494	0.223544	1.88387	8.91795	0.763973	1.14525	2.244	6.26842					2.32384	1.30658	0.0465946	1.18339	1.35059	2.52788	2.30671	0.425266	4.25668	0.155966	0.899687	9.69617					0.039682
	6.89662	0.192544	1.306	0.799138	0.945157	1.00702	0.277649	0.840295	14.5561	1.06638	1.57931	1.20123					0.121051	5.61939	2.41559	11.9111	12.7619	0.328408	3.82752	10.0048	0.461033	1.35167	1.83246	6.12442					3.21327	1.55409	0.0719501	1.24366	0.877095	1.73317	1.81404	0.975941	4.47112	0.107088	1.33657	9.48313					0.0634331
	4.73628	0.47327	1.25683	0.401128	1.45452	2.11799	0.232111	0.941334	12.6023	1.09061	1.81194	0.968978					0.212513	5.60035	3.72165	10.6271	11.8143	0.0611201	5.04329	10.8208	0.468683	1.26222	1.58615	6.62205					3.90285	0.101298	0.0698867	1.83018	0.780954	2.73829	3.43827	0.356961	5.68444	0.0876613	1.54402	7.54668					0.0457178
	4.10924	0.471008	0.508068	0.242663	1.45519	2.155	0.99761	1.15339	12.8029	2.58211	6.00022	1.38762					0.429903	7.38185	5.59012	11.1904	9.95357	0.419287	6.23785	10.4693	0.120557	1.14616	1.72335	4.7458					5.85209	1.77643	0.123492	0.866982	1.13289	2.95112	2.38028	0.17607	8.51884	0.139964	1.69211	8.46138					0.0972336
	3.08601	0.194399	1.0952	0.353624	1.15725	0.736701	0.587096	1.07814	10.1542	2.01591	3.86641	4.04461					0.205295	6.97921	6.69679	11.0104	7.85016	0.760844	9.16469	10.9279	0.395081	2.23481	2.27623	3.99252					6.83419	1.44457	0.0432711	1.48407	1.15023	3.36572	2.35236	0.417399	9.32166	0.0330966	2.96085	8.51978					0.124314
	2.14806	0.405087	0.757	0.221097	1.18262	0.735378	0.602537	1.87472	6.34384	1.67868	4.08738	5.62529					0.638412	12.8709	8.21048	10.1166	8.05661	0.532956	8.53974	11.1359	0.625306	3.07809	2.94384	5.08044					8.31452	1.15376	0.0850107	1.24414	0.206672	2.98532	2.42896	0.428761	10.9829	0.146544	6.89058	7.98468					0.140515
	1.47813	0.458352	1.19718	0.272263	1.92587	0.514598	1.11473	1.45996	6.28831	1.66321	3.80515	6.50545					0.171937	12.1099	7.23503	7.90777	8.48831	0.487103	9.46506	10.9373	1.2751	3.24356	3.75009	3.98723					8.45273	1.12494	0.0763367	1.15731	0.39439	3.01609	2.33636	0.505894	13.4436	0.0975479	8.48471	3.60191					0.573118
	1.05882	0.498269	1.40477	0.04901	1.40582	0.871796	1.8062	0.694771	2.56858	1.66377	2.01646	8.72832					0.175712	12.7781	7.23969	7.5287	7.66095	0.390348	8.78962	11.814	3.03562	5.48133	4.2936	4.92811					10.0971	0.573171	0.0987758	0.921027	0.330072	2.59687	3.14793	0.491125	11.5909	0.0919917	7.26375	6.3783					0.938037
	0.502853	0.24857	1.05905	0.719074	1.25873	0.789113	1.27386	0.821901	1.53901	1.74709	3.308	8.91875					2.01438	12.7129	10.5084	6.56383	8.79214	0.989649	9.51653	11.9205	3.0986	4.65598	4.41529	5.20893					8.66992	0.813578	0.0714739	0.940078	0.488027	2.3491	2.54278	0.660572	14.1333	0.131048	6.95209	2.41659					3.4719
	0.446129	1.25546	0.925537	0.13372	0.766683	0.51604	0.829457	3.83715	2.28223	1.34196	2.41548	10.9425					2.78661	13.6465	11.3326	6.23736	9.38157	1.53344	7.63549	10.0259	4.62994	4.72134	3.87306	8.39488					8.05	1.33463	0.0320976	0.503697	0.174019	2.65891	2.84583	0.158185	14.2816	0.061986	5.65346	2.17652					2.33167
	0.845497	0.630897	1.26648	0.239135	0.398968	0.807272	0.390748	1.85002	1.74076	0.922454	2.53415	9.81805					5.02543	12.1357	13.0049	6.11375	8.51295	0.684534	8.12642	9.09114	4.10879	4.64615	2.71013	8.8369					6.67794	1.96553	0.0281341	0.072364	0.333564	4.0017	2.85463	0.165431	15.3987	0.0842518	3.47384	1.80215					2.03533
	1.50521	0.287494	0.774169	0.0121669	0.671887	0.398187	0.886672	1.83806	1.93874	0.447911	1.3831	9.26626					3.33997	12.7653	13.1395	6.22823	8.6925	0.693716	7.06916	9.30277	4.13694	3.8596	1.19279	6.52428					4.38763	1.74659	0.115856	0.350954	1.10775	4.61543	5.18311	0.138978	15.1459	0.0641116	4.247	1.24911					2.16504
	1.98079	0.202298	0.631192	0.0429298	0.672563	0.246019	1.50843	2.41539	1.48344	0.381515	1.09117	7.99734					2.80265	10.0946	14.0407	6.71036	8.97755	0.659875	6.95957	8.76713	3.76568	3.51806	1.37115	8.57062					4.14832	1.86524	0.116911	0.755522	0.384851	3.81503	3.6212	0.65618	16.5018	0.0593119	2.56005	1.00738					2.42306
	1.60628	0.019395	0.467675	0.307557	2.28206	0.452752	1.41334	5.12596	1.49117	1.17193	1.60869	6.05452					2.39918	9.14442	14.0689	7.25338	8.47686	0.494698	6.74125	7.31142	2.50049	6.75752	0.747875	5.03346					2.50664	2.55406	0.0169463	1.59276	0.161355	3.26372	4.82273	0.300704	16.0426	0.0856967	1.71423	2.11358					2.11587
	2.43766	0.268215	0.352452	0.18671	5.5484	0.269175	0.244673	3.29246	1.18991	1.8343	2.12803	6.19907					1.93311	7.85094	12.8654	7.71931	7.48015	0.561196	8.4079	4.52351	1.51365	5.55166	1.83464	5.4623					1.38906	1.92709	0.187443	1.58637	0.224298	2.52335	3.81723	0.354282	14.7321	0.115201	4.42298	2.3683					1.45139
	2.21498	0.733902	1.29551	0.185798	7.71346	0.239703	0.280068	1.23353	2.82292	2.3325	0.977188	2.9368					1.97333	6.69831	12.7105	7.88876	5.87037	0.875615	9.17558	3.89118	0.877377	8.41678	1.8415	5.34554					0.804229	1.93959	0.0384967	1.90152	0.903253	1.96774	3.72426	0.590395	16.018	0.116668	1.67274	1.71068					1.40717
	2.16524	0.918578	3.17553	0.380756	11.9913	0.25405	1.57517	1.01258	0.680263	2.87409	1.12894	1.40488					3.94424	5.77113	13.402	6.22562	4.95285	0.842798	11.0258	1.01147	1.06898	10.2606	1.61361	4.44706					1.47877	2.58125	2.39034	1.51952	0.804844	1.66261	5.37044	0.465544	14.5445	0.119185	2.12049	1.74747					0.831791
	0.960538	0.410572	5.301	0.174853	11.6556	0.3548	2.71149	0.877716	0.540315	4.49238	1.077	4.1511					2.16414	6.66695	11.2752	6.57007	4.78818	0.319699	11.7886	1.17117	0.909656	10.8743	2.29329	3.96601					2.7082	3.35471	0.793744	1.38404	0.541875	1.23329	3.24586	0.0754263	16.2266	1.66348	1.85937	1.49411					0.889645
	0.847268	0.60642	5.51472	0.340086	8.99504	0.858104	2.6804	1.83346	3.50047	4.49279	1.78587	3.33077					2.10914	5.82408	13.0786	6.30826	3.80765	0.162483	12.1466	3.13452	0.861918	12.6717	2.41644	3.70133					2.21489	4.24571	0.672379	1.12373	0.444433	1.63835	2.77136	0.293292	13.538	1.50846	1.97656	0.933061					1.50173
	0.543435	0.528372	7.18891	0.20849	6.53237	0.8847	3.97831	1.66505	3.61575	3.63442	2.09734	4.77887					4.0529	5.14214	11.2111	4.69469	3.53463	0.149095	11.6	3.4508	0.747916	11.3418	2.53574	2.57688					1.5067	5.6827	0.60706	0.83968	0.370352	2.14101	1.98132	0.34903	15.7467	0.647458	1.83681	0.309946					1.45036
	0.451029	0.479298	10.2813	0.160922	5.68919	0.328779	5.14105	1.51584	0.878408	3.85124	0.71308	2.37236					2.82652	4.97311	8.77048	3.24165	3.09067	0.212988	9.72134	2.46999	0.292536	11.5931	3.02221	2.30399					1.11398	5.43079	1.47026	0.650251	1.70449	1.6298	1.43536	0.195335	13.4437	0.576295	0.523299	0.477086					1.5263
	0.298671	0.989964	12.3374	0.197223	4.46821	0.412837	5.35321	0.842601	1.20974	4.93087	0.470849	1.51572					2.89368	6.76204	8.65595	3.16846	3.45765	0.138543	8.88729	1.82163	0.666306	10.4209	2.70362	1.22568					0.838028	6.39363	0.234702	0.579613	2.37858	1.50959	0.28809	0.428842	16.1977	0.398928	0.587919	0.202341					0.839366
	0.218158	0.454873	11.4458	0.0899738	3.92257	0.952689	6.55085	0.731776	1.38321	1.97922	0.869018	1.01355					2.81675	7.3257	6.13037	1.69946	4.28755	0.257553	8.6769	1.40528	2.29982	9.01295	4.74936	1.2265					0.844185	6.07532	0.308949	0.471002	1.21197	2.3907	5.20808	0.303715	13.1947	0.66629	0.565361	0.259919					0.937344
	0.0170814	0.749589	13.9018	0.180648	4.13369	0.789466	7.40107	3.54982	1.03263	3.54289	4.33281	0.789041					3.38048	6.19134	4.50612	2.87583	4.84695	0.141937	4.14992	1.42877	5.55496	10.4325	7.04748	0.753193					1.68486	6.40127	0.414042	0.632372	1.16671	2.78612	7.76442	0.0771536	15.549	0.507724	2.96796	0.587654					1.06901
	0.205398	0.115276	15.5916	0.0351488	7.4477	0.737475	9.81132	3.45884	0.775401	1.85534	2.288	0.509761					3.59836	4.61434	3.1689	5.12529	5.57773	0.198993	2.91191	1.87932	8.9012	8.79976	7.05918	1.06694					2.46054	6.56198	0.331078	0.694221	1.27396	3.18128	11.1262	0.00913794	11.4143	0.460999	2.41403	0.741114					0.767773
	0.265517	0.65112	16.6624	0.0494135	9.69561	0.472233	10.0176	1.23633	0.839841	1.87573	1.79301	0.221445					3.32123	3.97958	2.02371	5.20509	7.89926	0.27143	2.05517	1.62867	8.4675	9.11902	7.31004	0.984221					1.82809	8.58555	0.310476	0.980178	0.999022	4.11381	9.09506	0.0663308	12.542	0.292718	3.04424	0.620788					1.31518
	1.05496	1.8968	16.3052	0.100061	12.414	0.51974	10.1813	2.85517	1.05744	2.09255	2.03827	0.304803					3.95097	3.66289	2.13822	6.56235	10.0745	0.261132	3.6949	1.14231	6.09328	10.6114	7.05389	0.79672					1.46521	9.22334	0.224333	1.14552	1.64595	3.84005	7.92434	0.136611	12.5585	0.126418	3.81595	0.802836					0.979124
	0.527413	1.01897	16.6545	0.265157	16.7371	0.733137	11.8045	2.20685	0.898783	1.70911	2.43955	0.183306					7.01837	2.53327	2.75858	4.86093	11.2583	0.12776	3.85532	0.859112	4.74877	9.06423	7.78792	0.516359					1.61758	10.1619	0.249129	1.52286	1.62276	3.01245	8.12412	0.0774584	7.87486	0.124213	3.99196	0.547602					1.03042
	0.410405	1.23407	17.9841	0.216996	18.9554	0.156249	10.7947	3.37581	0.526404	1.36394	0.731524	1.07764					7.12032	1.88857	6.13298	3.89946	12.3825	0.179994	3.33319	4.45506	3.92392	7.99692	7.36127	0.663225					1.49685	8.44209	0.112898	1.62718	1.12482	3.61181	6.01647	0.111157	6.31525	0.090654	2.81125	0.624042					1.44294
	0.630068	0.70272	19.0124	0.211013	19.5498	0.665859	13.0013	3.76235	0.75389	0.676733	1.43288	0.573157					7.37388	1.69152	3.6296	3.60541	14.9314	0.238467	2.72808	2.36509	2.37888	6.6129	6.05066	0.610568					2.68198	7.9112	0.23579	1.43916	0.57473	3.37501	5.31953	0.207422	4.55373	0.0469333	1.62296	0.470278					1.17379
	0.587206	0.797465	18.2103	0.248507	18.8538	0.879356	10.9321	3.5719	0.32242	1.04035	1.82105	3.11937					8.42018	1.25526	5.35312	2.6577	18.8949	0.582298	4.20566	2.14503	1.73747	5.61836	4.86853	0.604851					1.74419	7.94714	0.107334	1.05122	0.480236	2.98314	5.01785	0.0986445	3.63276	0.0379851	0.462705	0.630093					1.30918
	0.260234	0.569432	20.1547	0.32104	18.402	0.450926	9.24002	3.10837	0.611238	0.223283	1.93568	0.528333					9.08888	0.843362	6.20514	3.85	18.5948	0.696294	1.88447	1.71085	1.32881	5.33916	4.35221	0.67287					1.19186	8.4954	0.148492	0.935425	1.40329	2.36453	4.49947	0.263451	4.0704	0.0683798	0.773153	0.52181					1.39895
	0.538739	0.482506	17.5646	0.181627	17.7014	0.448269	8.8165	2.14389	1.01556	0.779538	6.21872	1.72436					10.0544	0.964352	5.5048	4.05984	15.8638	0.238531	1.53892	1.364	1.22925	5.34445	2.77901	0.27273					1.51485	6.87146	0.0187294	0.798688	0.756391	2.39981	3.51866	0.285543	3.95269	0.160732	1.76066	0.41993					1.23622
	1.39216	0.407449	16.1651	0.0511248	18.0808	0.379025	9.61972	2.26124	1.2969	1.44146	3.31269	3.15224					13.0871	0.225504	9.57313	3.94805	14.4649	0.374026	1.44937	1.26207	1.33	7.22946	2.63106	0.160601					1.01631	7.15014	0.0601709	0.608331	0.292378	2.95703	3.13854	0.512148	8.39269	0.110684	1.61486	0.438211					1.11195
	2.72195	0.546716	16.2931	0.120166	18.7268	0.111204	4.40779	1.27202	1.8519	1.12833	4.17805	1.74614					12.5449	0.12061	9.61552	3.48406	13.1879	0.421771	2.15511	0.911415	1.50338	7.05668	0.935437	0.590967					1.34784	6.588	0.014965	0.527815	0.00274121	2.14656	2.50731	0.219932	7.38261	0.196128	1.443	0.288773					1.13648
	3.69149	0.426132	15.3463	0.120497	18.7107	1.4831	2.64998	0.291112	2.63018	0.621049	2.60794	2.87262					11.8812	0.404473	10.9222	2.00512	11.7165	0.267259	2.55832	1.25487	1.05995	8.11395	0.521128	0.782218					0.844674	8.44	0.0294168	0.500954	0.162352	1.2853	2.1575	0.109539	6.30146	0.228734	3.03497	0.618782					0.664379
	4.27643	0.37728	12.3134	0.0127016	18.7637	2.43625	2.20857	0.222482	3.7902	2.65016	3.15946	3.85774					10.0978	0.732579	12.0573	1.49753	14.1781	0.266942	3.67371	1.19275	1.46585	9.54472	0.256299	0.85374					0.643646	6.92556	0.0389249	0.302402	0.0530498	1.87951	1.74829	0.207038	9.27556	0.409524	1.34351	0.306876					0.692955
	4.44137	0.53192	9.85639	0.213271	18.8859	3.2568	2.08443	0.475055	2.90909	3.31814	3.1746	4.72462					9.84219	1.93848	12.2376	0.66954	13.2921	0.412336	4.0462	2.04111	1.39958	10.8022	0.340406	0.868642					0.497518	5.67922	0.0563103	0.461304	0.0816401	4.0858	1.47282	0.263965	6.20115	1.09145	1.88413	0.381154					1.41788
	6.57617	0.558219	9.37172	0.283074	19.1543	5.39728	3.61158	1.01977	3.77117	2.59377	1.82227	5.38922					10.1047	2.46028	12.5738	2.95032	16.2651	0.239791	4.28806	3.18524	1.013	10.4065	0.762296	0.405134					1.06519	4.61067	0.0143393	0.190676	0.111469	3.16968	2.98481	0.0602867	4.76147	1.41424	1.1958	0.546789					1.46688
	4.9181	0.575458	7.87242	0.0566297	20.5343	5.52872	2.7145	1.21789	3.00769	2.01366	2.06395	3.99091					9.47362	2.93216	12.0156	1.78208	17.7773	0.171206	3.46529	2.46141	0.895046	10.3625	1.56711	0.643287					0.960333	2.79208	0.0156425	0.537695	0.115123	2.94284	1.68416	0.0769864	3.4564	0.884539	0.176449	0.595593					0.660791
	5.79765	0.639	7.37411	0.32416	19.324	5.49797	3.22524	0.935025	2.19182	2.76649	2.50683	5.58648					8.09899	3.51114	10.025	2.30887	16.6129	0.17821	3.09171	2.74457	0.739627	10.5722	3.74317	0.74711					1.10294	1.36436	0.0354722	0.376931	0.129266	3.72887	1.47038	0.216496	1.34668	0.939729	0.298875	2.88277					1.55618
	5.00732	0.456137	6.13965	0.190389	18.9467	5.49411	4.10826	0.473754	0.942055	2.5317	2.26584	4.90017					7.50329	3.16358	9.36144	6.20025	15.8771	0.204175	3.43932	3.03517	0.714603	10.0734	5.59525	1.0218					0.570019	2.94573	0.12726	0.394346	0.16263	3.13428	1.46074	0.212158	0.446438	0.675001	0.789316	1.02285					2.04121
	5.08276	0.538983	3.21216	0.318284	18.2269	4.15394	4.22173	0.207808	1.19821	1.77389	1.17533	4.28623					6.1091	3.14293	6.91829	5.00448	13.3974	0.0824411	4.32596	3.92367	0.928731	9.5451	5.19421	3.43721					1.16626	3.20681	0.0529089	0.235101	0.125407	3.27522	0.977106	0.394364	1.24115	0.717667	0.769823	0.459769					1.98782
	5.12363	0.661006	5.18703	0.256439	13.2677	2.62025	4.8465	0.449515	0.840075	2.26463	1.48725	5.00041					5.10608	3.24877	4.90811	5.99082	14.2338	0.0660219	3.22353	6.65385	0.283932	10.8266	5.48088	3.31383					3.31618	2.17346	0.124018	0.202028	0.101263	2.67104	0.977334	0.403729	1.51165	0.766113	0.337194	0.769448					1.61057
	5.59004	0.954595	4.1103	0.214359	12.7202	4.49678	5.84727	0.886076	0.943663	1.52131	0.81013	2.32496					5.36811	2.6451	5.51753	4.38183	10.8609	0.0901595	1.96788	10.1778	0.512994	11.0045	6.84363	0.590453					2.72099	1.79458	0.119842	0.318401	0.120021	1.39777	0.853091	0.92639	2.97064	0.523016	0.18556	0.400464					1.64721
	7.76266	0.492549	3.3191	0.0591176	10.3281	3.95801	8.28042	0.100657	0.967791	1.69991	1.44273	2.82387					5.92714	2.1676	0.631196	3.76638	9.51679	0.0778073	1.41619	10.5472	0.36378	9.52543	7.55299	0.201542					2.80218	2.01881	0.0786133	0.118015	0.0609839	2.29882	0.606683	0.707114	2.49178	0.746201	0.465979	0.33815					1.13656
	6.06603	0.306443	4.46278	0.201373	8.76698	3.22296	7.78266	0.283095	0.744627	2.06095	0.958022	1.62442					6.21963	2.11113	2.99332	2.89747	9.04796	0.103352	1.31721	10.2305	0.413792	9.77154	8.35467	0.368417					2.17939	2.83306	0.0409	0.181347	0.0494552	1.30878	1.10154	0.864274	2.11045	0.395426	0.368918	0.483764					0.812406
	6.07716	0.339064	2.99227	0.0771287	8.7587	2.70002	7.69373	0.17378	0.527241	1.85207	0.681392	0.895597					7.14658	1.45577	4.00075	1.89792	6.96759	0.0666486	2.9028	9.94135	0.437294	9.71273	9.82286	0.599236					1.6045	3.31318	0.0239386	0.219639	0.100301	0.523517	0.873815	1.17346	1.72916	0.115689	0.282516	0.208183					0.918128
	5.37637	0.0495102	2.28931	0.0783644	7.16275	2.26695	10.0732	0.884772	0.638864	0.780314	2.70828	0.217604					10.0032	1.29299	7.35074	1.22852	5.0146	0.0342438	2.3552	10.974	0.237944	9.56976	8.51934	0.284739					1.40627	2.84613	0.0791605	0.15927	0.120951	0.349145	0.783776	0.709658	2.51543	0.29304	0.209787	1.01024					1.07494
	3.96553	0.557483	2.49055	0.556929	6.15015	2.94823	7.46755	0.651907	0.551356	0.208152	1.90075	0.576261					10.7496	1.10025	6.12035	1.01014	2.98269	0.0509791	1.95591	9.14849	0.0796759	8.37526	7.56003	0.502832					0.726904	2.81417	0.0603474	0.17401	0.0892356	0.711613	0.505301	1.11483	4.91671	0.0988563	0.19039	1.92576					1.79145
	4.74293	0.482327	8.62098	0.968701	9.02876	2.17416	6.87592	1.15001	1.28187	0.82685	2.30009	1.45466					11.8979	1.15717	4.82246	0.923651	1.04569	0.151386	1.41657	8.66642	0.388404	7.38154	7.7615	1.44483					0.510474	3.00936	0.0968679	0.230319	0.125543	0.998862	0.324141	1.20923	4.60847	0.29599	0.4568	2.4657					2.09941
	2.92017	0.429157	4.81248	0.473961	7.14655	3.7021	8.26336	2.40549	1.49928	1.32009	2.09927	1.998					11.34	1.13313	11.1886	0.958884	0.607395	0.0228616	1.14123	7.76576	0.23323	6.10048	6.7046	1.50247					0.252589	3.0604	0.24542	0.196645	0.0789253	1.38317	0.599061	0.588431	5.49979	0.638924	1.23357	2.90469					0.252382
	2.19239	0.601833	2.30964	0.394395	8.41658	5.52309	6.87986	0.839137	1.71717	1.83167	2.27168	4.22162					10.9152	1.1952	9.33645	0.569085	0.929745	0.114771	0.515905	4.70482	0.228962	3.57593	8.5618	0.292127					0.740595	2.40377	0.0738288	0.285019	0.0551564	1.45461	1.59459	0.7623	4.86762	0.0527591	0.096136	2.14768					1.61444
	2.22723	0.621769	1.53856	0.405716	9.58731	9.81906	4.61014	1.12834	1.71638	1.9717	2.90072	5.65378					10.407	0.527418	8.77143	1.90263	0.881747	0.0557288	0.585529	3.84173	0.247346	3.91813	7.26278	0.253705					0.444391	2.12107	0.0124661	0.0738881	0.0399071	1.9908	2.77219	0.757791	3.47787	0.481696	1.17311	1.79438					1.299
	1.82717	0.209271	0.596222	0.230387	6.50125	12.8658	3.77891	3.06336	1.48544	2.34049	1.49241	8.49865					9.14453	0.294018	9.43741	3.10988	1.86852	0.0147919	1.9644	2.95582	0.413744	5.71192	6.16341	0.0674047					0.603815	1.95798	0.0398768	0.281822	0.0814384	2.35781	1.24507	0.0225548	2.85721	0.415201	0.276284	1.56796					0.893177
	2.82953	0.569008	1.12567	0.099833	4.48294	10.8137	3.09504	2.51193	1.16243	1.98524	1.57346	10.4803					10.0996	0.217631	9.73986	3.88821	0.621799	0.040669	1.17945	2.0843	0.474595	7.25762	7.04593	0.809653					0.60283	1.63756	0.094977	0.130194	0.0878988	1.78616	0.848262	0.0208821	2.71593	0.237474	0.234355	1.35364					0.335693
	2.69893	0.502816	0.967868	0.305546	1.67081	10.3208	2.18995	3.38204	1.58717	2.23794	2.08673	14.5389					10.2841	0.707093	8.93057	4.57025	1.70897	0.106678	1.09663	1.38344	0.208738	6.6222	6.19993	0.59688					0.470116	1.63469	0.417868	0.165479	0.0360938	1.40048	2.5646	0.721191	5.08788	0.859693	0.446918	1.28556					0.268837
	2.85282	0.518392	1.10822	0.225357	4.79075	8.71637	2.04536	3.87366	1.3505	2.12377	3.89483	17.1952					12.1835	0.465526	9.75295	3.10477	0.556751	0.0424276	0.666755	0.815562	0.371201	7.18145	6.72882	0.373264					0.235132	1.36273	0.678193	0.327251	0.022954	0.903822	0.897282	0.131335	2.22362	0.579622	0.304233	1.09835					0.140335
	3.23407	0.836998	0.827084	0.509497	6.15867	8.0954	0.981094	5.2924	1.31107	2.6258	3.15739	18.9017					11.4334	0.660416	8.96358	2.25925	2.6724	0.0342571	0.669102	0.785155	0.984265	6.15849	8.0651	0.530897					0.307791	1.29994	1.75558	0.0633742	0.0501261	0.728876	0.82849	0.252906	1.77048	0.624079	1.17895	1.26761					0.198081
	4.325	0.281342	2.27824	1.00964	7.18358	7.22521	0.626083	6.80434	1.38988	4.41588	2.31729	17.7998					10.9383	0.939702	9.47398	0.946781	1.25058	0.0342329	0.834673	1.24297	1.28179	6.07019	9.9471	0.333898					0.0985174	1.19387	2.54542	0.210749	0.126657	0.752675	1.03028	0.14147	1.236	0.153764	0.498642	0.734309					0.525303
	5.43075	0.39139	1.29993	0.670664	6.17434	5.83198	1.31853	9.1894	1.09973	6.74524	2.89538	19.0842					10.0733	0.711338	8.92718	1.0566	0.749199	0.0527819	0.720528	1.83946	0.681545	5.3001	9.8701	1.19703					0.113077	0.938995	2.27613	0.192758	0.987311	0.318368	1.32457	0.442035	0.018396	0.428236	0.426593	0.62949					0.332411
	5.54858	0.57922	1.63379	0.744901	6.70096	5.43518	1.50322	11.7419	1.76228	10.6076	4.00636	21.0057					13.7083	0.544726	8.0562	1.05296	0.793375	0.165675	0.561688	4.22645	0.764714	4.49211	10.725	0.858361					0.136096	1.32785	1.50378	0.184863	1.96562	0.221308	1.40221	0.0797727	3.09681	0.729276	0.253299	0.509092					0.699229
	5.78919	0.625446	2.06975	1.08015	7.22458	4.45657	1.35546	12.6257	2.2482	12.0984	5.6173	21.9737					11.8596	0.569707	6.41688	0.804158	0.941964	0.0654979	2.01081	2.62882	0.981205	4.03732	7.22716	1.05562					0.268181	1.54157	1.75768	0.175836	1.92438	0.25035	1.94997	0.496512	1.89373	1.00596	0.296761	0.28041					0.288282
	7.94475	0.404447	5.67532	0.665245	4.49751	4.53745	1.11329	12.1427	3.95758	14.4822	1.12424	19.936					11.961	0.428235	5.78339	0.719328	0.723396	0.0899398	2.91133	2.95635	0.514074	2.25854	5.95066	0.256812					0.232027	1.8341	2.06661	0.11651	1.47193	0.554509	1.99946	0.356108	0.873489	1.51218	0.644684	0.292733					0.143112
	7.75769	0.504828	5.17261	1.04076	2.07319	2.72465	0.671296	13.4727	3.35558	16.9291	1.04209	19.1079					13.5936	0.371359	5.91785	0.924473	3.95987	0.135391	3.21753	4.4281	0.210414	2.04507	3.77264	0.337764					0.900684	2.37032	2.04342	0.2363	1.03854	2.75299	2.14112	0.327397	2.70543	1.88599	2.50395	0.586506					0.158384
	8.66717	0.575156	0.969806	1.01738	1.16092	2.1462	0.533721	14.6124	2.53247	18.7739	2.74169	17.7255					15.1838	0.450268	5.72197	1.0046	3.3308	0.0869018	2.28435	4.64416	0.145919	1.04486	1.83239	0.582713					0.294538	3.18958	1.68818	0.142707	0.592312	3.12355	1.85114	0.18043	1.75633	2.38117	1.54733	0.495026					0.195438
	7.08595	1.01893	0.810526	1.02452	1.9769	1.42772	0.644489	14.7357	2.40804	19.731	0.819315	20.1557					13.6086	0.611339	4.88867	0.766809	2.23904	0.146439	2.91192	3.16502	0.316085	0.987741	1.70048	1.23048					0.324309	4.67118	1.59421	0.105923	0.893848	2.56943	1.70828	0.326958	2.99135	1.75503	1.5727	0.989873					0.200217
	6.14104	0.388545	0.699986	0.767672	2.21585	0.536796	0.527358	15.1129	1.81281	18.9702	1.59756	16.964					10.4453	0.551412	3.42918	0.865937	1.10629	0.0711265	3.92371	3.3432	0.252984	2.88446	3.327	1.78957					0.369788	3.7368	1.69709	0.0789064	0.702369	1.31961	1.60133	0.477229	0.99739	1.61721	1.47949	0.352194					0.142081
	6.59879	0.540442	0.701203	0.548561	2.45436	0.620739	0.618638	14.3975	1.65707	22.3287	0.602734	13.6397					12.0944	0.0654471	2.82543	0.802053	1.56256	0.0953776	6.43339	2.10568	0.114135	4.44964	2.73273	1.50515					0.59631	2.44513	1.39484	0.0534047	1.62676	1.1261	0.972363	0.37775	0.633447	1.88028	1.72751	0.381681					0.219061
	4.69628	1.12344	0.845024	0.53822	1.79841	0.535739	0.640809	14.8623	1.34362	19.3891	0.555241	11.8009					8.05422	0.299616	2.1898	0.938039	1.8871	0.064287	9.45062	2.83361	0.458738	3.5912	3.06339	1.26682					0.195728	1.42917	1.59452	0.0858986	0.792937	0.752114	0.613141	0.148649	2.79261	1.92245	1.256	0.347007					0.0862255
	5.99493	1.59083	1.08235	0.38217	1.76341	0.75994	0.513377	15.5053	3.15049	23.5113	0.526766	7.43953					6.32196	0.424336	1.66757	0.578069	3.74556	0.0905503	8.85434	3.56639	0.075656	3.62525	2.50822	0.426176					0.210102	0.737555	2.02308	0.031717	0.40474	0.164747	0.632627	0.10908	0.945963	1.6503	0.885133	0.500941					0.0797798
	6.01124	0.654765	1.20816	0.214738	2.97064	0.363499	0.324161	15.6297	2.51301	24.1469	2.07577	5.27958					3.99413	0.945676	1.50981	0.674954	2.4141	0.0314235	6.49792	3.03703	0.147594	4.59018	3.95898	0.0839384					0.462191	1.534	2.24722	0.055282	0.614512	0.390267	0.181983	0.564915	0.675294	2.3733	1.14174	0.350683					0.0764335
	6.67039	0.366556	1.06758	0.342075	2.51726	0.416604	0.657998	15.1706	1.46993	23.4392	0.502893	4.47652					2.05741	1.12921	0.946545	0.791254	2.86376	0.113955	5.87533	4.43716	0.450544	5.27754	4.27955	1.13897					0.210365	1.11232	2.79752	0.0312547	0.659522	0.600589	0.114879	0.422278	0.621895	2.22778	0.817431	1.14768					0.0664444
	5.26273	0.149718	1.09072	0.276023	2.8628	0.964285	0.320835	16.2855	1.59479	21.6807	1.3692	4.94481					1.25237	0.968545	0.354353	0.379065	3.22072	0.052038	4.73397	5.12909	0.307907	3.90694	4.0682	1.434					0.279921	1.04682	4.34599	0.0968448	0.400004	0.354367	0.120443	0.352546	0.414614	2.3017	0.293044	0.977087					0.0388366
	4.08964	0.200471	0.730456	0.857242	2.24193	0.324436	0.0978643	19.0447	2.78079	23.6676	1.58878	6.77506					4.98768	0.897122	1.16599	0.3809	2.46689	0.0682288	6.41137	4.92816	0.511749	3.16501	3.82636	1.31125					0.898271	0.888641	3.18247	0.0723853	0.279439	0.16333	0.166086	0.190832	1.98486	2.7105	0.517401	0.208851					0.0098133
	3.22153	1.28975	1.96165	0.854442	1.4899	0.33854	0.411496	18.959	4.07762	22.1012	2.04473	8.35704					2.0477	0.275572	0.144061	0.173425	2.27795	0.0267076	5.5302	4.82907	0.188989	2.84574	4.09769	1.75636					1.45532	0.216318	3.77767	0.0248541	0.164373	0.422166	0.222958	0.0965173	0.549324	3.15053	0.295263	0.479317					0.040211
	2.81875	0.170674	3.08692	1.26792	1.24255	0.366737	0.251359	21.119	4.07528	21.9259	2.61802	10.2471					2.40214	0.396258	0.906312	0.14478	1.60805	0.0838463	5.0527	2.56974	0.304219	1.08817	4.18464	2.23679					2.07517	1.6498	3.21462	0.0680397	0.11173	0.174669	0.328313	0.53137	0.600627	3.29528	0.287559	0.355117					0.0585652
	3.04312	0.251362	1.59631	1.13369	0.531817	0.402945	0.197852	22.0172	3.26225	20.6203	0.738759	9.79145					2.59466	0.668566	1.15357	0.0687384	1.12346	0.059521	4.8246	3.49875	0.19962	1.39834	4.49225	2.4583					1.65486	1.58647	4.70698	0.0164395	0.112748	0.224234	0.245049	0.375665	0.61073	4.99078	0.309366	0.398266					0.0531123
	2.55651	0.283651	1.69885	2.13518	0.790813	0.428839	0.321833	20.773	2.3849	20.9868	1.19055	13.4264					3.64045	0.535853	0.782265	0.0288999	0.830089	0.117186	4.01953	4.01902	0.202234	1.44842	4.9839	3.4622					2.51439	1.23939	8.96972	0.106813	0.224759	0.266383	0.252972	0.226151	0.477842	5.64601	0.0565069	0.862277					0.0702019
	1.96922	0.361291	2.58072	1.29903	3.6002	0.430911	0.621151	19.7679	2.05155	20.0908	0.763151	15.5673					5.04518	0.949956	0.535084	0.092446	2.02211	0.199748	4.60356	4.85516	0.245365	1.45584	4.94861	8.45333					2.99447	0.849792	5.71807	0.650597	0.0791874	0.15769	0.258536	0.15802	0.415092	5.00934	0.274389	1.07859					0.0183238
	2.23191	0.909826	1.45796	1.80381	4.60283	0.391916	0.39616	20.2717	2.07968	20.4819	1.03837	17.218					6.53845	1.20417	1.31232	0.0252432	0.73923	0.17865	2.36953	5.27268	0.328565	1.80222	4.13804	3.86687					1.92808	0.925038	7.63699	0.48022	0.0999146	0.18374	0.159318	0.294208	0.390985	5.39311	0.464769	0.653868					0.146917
	1.51342	0.676302	0.849355	1.98223	7.03198	0.453464	0.444726	19.6518	2.09147	20.5647	2.65705	16.995					5.89731	1.02791	0.283988	0.135485	1.42451	0.197094	2.09571	8.40058	0.0255693	3.93846	3.14163	3.83135					2.12749	0.650355	9.14544	0.481043	0.0216214	0.155461	0.111801	0.237058	0.283091	6.47924	0.174537	1.30276					0.123385
	1.12526	0.870367	2.22732	1.09419	8.40839	0.349273	0.422289	21.7049	2.39865	20.6779	4.12574	20.0427					5.4504	0.993008	0.471505	0.0350781	0.154378	0.0848027	2.14861	8.36659	0.209376	1.95827	4.20089	3.95556					1.72117	0.474599	9.08725	0.387001	0.10465	0.138231	0.0919182	0.582362	0.224916	5.99869	0.243551	1.39076					0.0596344
	0.954999	1.2868	2.69572	0.707703	9.3685	0.244656	0.175937	20.2269	2.76604	21.5219	0.19248	21.1218					5.07021	0.885893	1.64936	0.101202	0.236585	0.012519	2.94797	9.6165	0.31365	2.1913	3.8956	5.01076					1.95854	1.8911	9.86574	2.04819	0.0900678	0.066618	0.0331932	0.200457	1.89152	5.40656	0.352535	1.64604					0.0797671
	1.73596	1.27859	7.33671	1.77561	8.59962	0.324666	0.316864	21.3127	2.92781	19.5204	0.854116	17.5388					5.21767	1.14311	0.19038	0.0310384	0.236474	0.19362	4.7036	9.95128	0.205644	2.20848	3.12503	4.13664					1.90557	3.88305	9.77558	1.55861	0.291291	0.116068	0.183697	0.358801	0.516764	5.819	0.124309	2.49045					0.090661
	1.66789	0.907569	7.28669	0.767604	10.9091	2.05137	0.39282	17.3511	3.10872	20.208	2.90143	16.495					5.52358	0.596806	0.733359	0.0737863	0.336119	0.326238	3.79262	10.1549	0.205406	2.56343	2.87924	3.59544					1.03404	6.05259	10.3305	1.77406	0.106062	0.0922716	0.086773	0.204567	0.580418	4.56217	0.0455774	1.20678					0.054072
	1.8105	1.06505	7.75164	0.735608	13.2179	1.96898	0.443385	15.7015	2.84872	18.7888	1.70536	15.1087					8.97646	0.578774	0.277744	0.104673	1.68587	0.151082	5.52241	10.4147	0.418334	1.92483	2.59986	2.73783					0.60609	5.50741	10.3488	1.76453	0.558536	0.584017	0.239708	0.0606096	1.48411	5.4576	1.0944	2.31127					0.0241763
	1.35254	0.647508	5.77761	0.981472	12.7266	2.04639	0.386987	13.7769	2.79505	19.2901	1.72645	12.0301					10.5128	0.506163	0.198917	0.05203	1.3921	0.538451	6.14499	9.54143	0.163507	1.16598	2.70761	3.02278					2.34102	5.12744	9.20935	1.44029	0.263369	0.331091	0.0503548	0.286654	0.113362	4.74465	0.663642	0.157406					0.00910373
	0.206676	0.829963	4.45651	0.417144	14.4256	5.62949	0.290787	12.012	3.94803	17.6447	0.833569	9.91343					8.61182	0.88092	1.4992	0.0113883	0.167611	1.42855	6.68286	7.66681	0.166181	1.49488	3.16181	3.41682					2.74588	4.71141	10.1771	1.21272	0.280693	0.509156	0.0504076	0.413987	0.263748	2.91399	0.364172	1.11728					0.17087
	0.355521	0.595787	2.71391	0.581808	10.4542	5.97347	0.427603	8.4642	3.31375	18.0701	0.650973	7.05535					7.57427	0.862221	2.45101	0.0729006	0.201016	1.04489	8.87792	5.36896	0.218161	1.20984	2.36432	2.39908					3.51943	4.36096	9.97352	1.01301	0.209216	0.502509	0.0776122	0.492844	0.238493	2.07623	0.256701	1.19006					0.0773682
	1.06909	0.514159	2.37213	0.510158	7.65003	5.87754	1.1919	5.57968	3.8911	15.9784	0.204334	7.5021					5.95743	1.19684	2.63582	0.101572	0.157564	1.02397	11.6166	4.50437	0.153618	3.9707	1.93713	2.4781					4.30595	3.20878	10.2992	0.651835	0.207202	0.652579	0.0693844	0.388894	0.306305	1.71304	0.0740241	0.364188					0.0529035
	0.557892	0.7545	1.0932	0.28753	3.46021	5.29895	0.592935	3.59006	3.53568	12.6648	2.02782	5.16847					5.82911	1.3655	1.99877	0.24023	0.174701	1.24734	11.5929	3.55032	0.11809	4.29918	1.84675	0.979096					3.26607	3.43453	10.8244	0.518401	0.114399	0.981558	0.0178289	0.412483	0.288962	1.0911	0.35737	1.01951					0.38901
	0.6374	0.412809	1.42987	0.757841	3.81784	4.14909	1.26906	1.9766	3.66518	10.0919	3.86996	4.63438					4.34442	1.50047	0.545672	0.279272	0.11321	1.86304	12.6838	5.22161	0.250413	4.14078	1.63729	1.14418					5.077	2.881	13.2006	0.245166	0.138452	0.732471	0.034141	0.253323	0.26168	0.731472	0.362888	0.379378					0.383617
	0.168035	0.318845	3.39523	2.5808	5.05502	3.99031	1.0201	1.77732	4.42099	7.63407	4.06271	2.92342					3.12314	1.11924	0.815385	0.543234	0.239863	2.03946	11.0991	5.44486	0.481973	3.67426	0.983767	0.38148					4.11754	2.40489	11.5584	0.216855	0.114617	1.39719	0.0510512	0.206733	0.0841165	0.381717	0.33932	0.335822					0.4245
	0.303142	0.735934	2.70699	2.00449	5.23868	5.27474	1.16909	3.2705	2.87156	5.50149	5.32392	2.64344					2.56806	1.34394	0.736903	0.8827	0.0944414	2.75688	12.3368	4.89577	0.605041	2.68284	1.29554	0.202298					3.73411	3.81602	12.1521	0.0915056	0.0235312	1.76645	0.0595007	0.39922	0.12847	0.451772	0.0592434	0.390441					0.784396
	0.487399	2.23195	2.27922	1.75261	5.62059	7.37936	0.930475	3.93773	2.32704	1.19305	6.16928	2.93911					1.11612	1.22293	0.164137	1.66615	0.11811	5.53627	11.0998	3.80286	0.222242	2.44827	1.51069	0.0741025					3.63553	4.01595	7.99712	0.0584512	0.0274674	2.07085	0.0482029	0.555456	0.0919297	1.38765	0.0665345	0.283386					0.333532
	0.208434	1.83832	0.933811	1.25179	5.57199	10.1188	0.579594	3.26639	1.96233	3.29883	6.39845	1.10231					0.542297	0.779982	0.258556	2.08863	0.0908804	6.65157	10.4714	3.9686	0.150652	4.12193	1.05479	0.347555					3.97447	3.62345	13.029	0.137051	0.0197138	3.49947	0.216999	0.618362	0.0751907	1.98925	0.315699	0.142179					0.373723
	0.488116	2.10328	0.794442	1.03302	8.86958	13.4672	0.997495	3.36006	1.01379	2.86839	5.92081	0.475254					1.56575	0.396743	0.237493	1.90084	0.233185	6.14986	8.13854	3.34372	0.252574	3.43267	0.773164	0.130677					3.30416	2.30722	8.31902	0.0700278	0.10467	3.91313	0.0785939	0.63385	0.203009	1.84648	0.20677	0.325137					0.148258
	1.07625	1.22743	0.547686	1.18262	5.32633	16.0847	0.0538729	4.2562	0.77629	6.16785	4.84058	0.920474					2.37898	0.841105	0.252168	2.06716	1.90773	7.30137	5.48928	1.92943	0.316909	1.85278	0.348582	0.228607					3.57113	1.17326	6.14355	0.160214	0.0164807	3.65939	0.108094	0.577929	0.48273	1.45677	0.177123	0.287918					0.185944
	0.866	0.288191	0.486704	0.593818	3.75967	16.2439	0.260211	4.21288	0.559412	5.84709	3.1756	0.65777					5.71598	1.6305	0.0561417	2.0579	0.501056	6.20917	3.03247	2.69968	0.104655	1.03075	0.483297	0.528454					5.65477	1.47211	4.30644	0.149409	0.0527931	4.84462	0.263425	0.339869	0.429741	1.73338	0.192076	0.385159					0.0687516
	1.02244	1.26063	0.0791967	0.515457	2.06618	15.9436	0.219721	4.07188	0.241296	3.14965	0.895882	1.16655					6.3995	0.691601	1.67095	1.51344	0.509872	7.56354	0.963646	2.69646	0.346043	0.683836	0.577026	0.37116					4.52594	0.982764	3.0028	0.141044	0.0242165	3.99755	0.138708	0.0702545	0.41708	1.20355	0.162687	0.104629					0.0254594
	1.08633	1.53865	0.663253	0.180113	1.59279	14.342	0.783197	2.78028	0.416075	2.93904	0.914903	0.922818					6.51783	0.51202	1.13047	1.54984	0.407291	5.50193	1.3841	1.93075	0.00910389	0.555458	1.3258	0.453887					3.56248	1.03896	2.30098	0.189964	0.0608511	1.98252	0.0826331	0.145736	0.832143	0.861089	0.315998	0.498289					0.0496006
	1.3049	1.83705	3.9769	0.151959	1.08837	14.7812	1.00599	3.07188	0.458657	1.78125	1.49193	0.541905					3.50237	0.798893	0.900655	1.62916	0.300483	5.07988	3.27923	1.05392	0.103371	0.163455	1.20476	0.0788518					3.12092	3.90822	1.67352	0.162276	0.172037	1.93504	0.0426395	0.0587168	0.858288	1.06393	0.890301	0.310147					0.0363745
	1.14492	1.26974	1.41058	0.143825	1.80199	13.3451	0.636474	1.29349	0.429011	0.968511	1.25367	1.2718					3.20397	1.25825	1.31053	1.51391	0.403638	5.63188	3.05179	0.657743	0.159574	0.294303	1.17562	0.41085					1.82845	3.72769	2.47489	0.0726918	0.0535574	1.91148	0.0852323	0.166039	0.675399	1.02421	0.266312	0.514257					0.0644988
	0.650961	0.825777	3.76597	0.418856	3.73062	16.0956	3.86584	0.8308	1.18553	1.44655	0.314453	1.88269					2.16818	0.79315	0.484595	1.30589	0.306766	6.47072	4.97229	0.453945	0.0904612	0.186887	0.900639	0.506528					1.15284	3.26205	3.5486	0.0556026	0.1087	1.26325	0.0790242	0.496534	0.589277	1.62507	0.548417	0.469368					0.241445
	0.547257	0.503845	1.15269	0.0736203	4.93198	16.2946	5.29155	0.92338	1.24837	3.66552	0.274431	2.91636					1.33048	1.01014	0.770235	0.552074	0.148973	6.95801	3.17782	0.296328	0.0449876	0.191615	0.605625	0.244174					0.641801	3.43218	2.58487	0.0861157	0.145352	1.43964	0.0689346	0.0933984	0.509961	1.06697	0.116873	0.0409546					0.156235
	0.316873	0.264407	2.18169	0.12055	7.16566	15.8955	5.79296	1.27802	1.97961	2.56833	1.48875	2.41321					1.73293	1.16683	1.26699	0.266973	0.230107	8.49889	2.84434	2.26573	0.234858	0.276699	1.47509	0.961473					0.694738	3.54683	2.48873	0.130185	0.0350395	0.728965	0.115259	0.25191	0.494982	1.26289	0.267022	0.386537					0.136738
	0.199284	0.314846	2.87461	0.0601975	10.7172	16.6739	8.06233	2.20372	3.22355	1.7559	0.439216	2.95281					1.254	0.904799	1.47175	0.200644	0.118854	9.70118	2.22027	1.49876	0.100286	0.235369	2.56665	0.555403					0.446984	4.42051	2.41848	0.0416115	0.0463074	0.645939	0.477165	0.485103	0.59584	0.823599	0.33533	0.125201					0.120524
	0.226391	0.794897	0.104928	0.679485	11.1867	15.7764	10.3992	3.10618	4.2909	2.46406	0.482523	2.6948					4.34289	0.656608	2.06095	0.366042	0.148814	9.77295	2.16908	0.883121	0.133494	0.21416	1.13926	0.393733					0.623905	4.23233	1.73957	0.0521148	0.0223379	1.53785	0.363584	0.112029	2.2049	0.627229	0.176551	0.124035					0.108355
	0.0947403	1.72182	0.380992	0.162616	10.4855	16.0621	10.0424	3.79003	6.83506	4.04044	0.676354	3.01225					2.88418	0.560995	2.57572	0.0786095	0.134661	10.229	2.35744	0.478388	0.523117	0.254097	0.873047	0.171941					0.525505	5.23608	1.64852	0.00806909	0.0269915	2.02267	1.39198	0.409388	0.765721	0.872901	0.0926944	0.117814					0.0722355
	0.12949	3.85629	3.48264	0.292654	13.597	16.3752	9.36452	2.9657	9.0973	5.3816	1.46945	2.48408					2.35786	0.567361	2.63685	0.0910372	0.513637	12.0996	3.53666	0.35223	0.320021	0.205722	0.988503	0.236205					0.235667	6.37984	1.12424	0.122693	0.11841	2.89775	1.2973	0.214211	1.02593	1.20659	0.0969787	0.439494					0.0340277
	0.693893	7.80895	1.39	0.166145	12.742	16.22	9.3831	2.32706	9.09287	5.31872	1.93841	1.61229					2.77767	0.613426	2.01844	0.112298	0.92545	11.2713	3.51498	0.478285	0.174553	0.331031	0.947374	0.0513843					0.168592	8.49271	1.05157	0.0266854	0.0574091	1.92004	0.913441	0.0974688	0.796056	0.47353	0.143854	1.16666					0.0200299
	0.674737	12.1727	1.62815	0.392531	11.262	17.4526	8.48972	1.94123	12.7063	6.20998	1.40396	1.56391					3.25473	0.523108	1.78564	0.16951	0.570061	12.4091	1.0662	0.76967	0.22396	0.300063	0.806801	0.187589					0.766277	9.77519	1.27467	0.0581746	0.271424	0.815379	0.559016	0.287488	0.795704	1.6645	0.118367	0.591542					0.0197078
	0.862131	18.3825	1.2866	0.336573	8.53519	18.751	8.29825	1.73787	11.1229	5.57983	0.439911	1.81474					5.22747	0.802171	3.31648	0.213566	1.35524	11.1903	1.5136	0.355233	0.138913	0.772514	1.1214	0.0750867					0.290663	9.40974	0.844189	0.0419192	0.12372	1.46451	0.419725	0.130275	0.731703	1.12561	0.317105	1.4589					0.0912618
	0.528403	23.3518	1.23153	0.524101	4.4063	21.7074	7.27877	2.57059	15.2028	7.84972	0.169165	0.997036					4.77889	1.04465	4.17094	0.267591	1.45457	11.6485	2.24757	0.41652	0.37052	3.40912	1.94995	0.128108					0.190989	9.67618	1.13406	0.0378333	0.396163	2.25091	0.148298	0.328323	0.63963	0.917645	0.0874717	0.972514					0.0482707
	0.334931	23.8596	0.964929	0.27631	2.42358	19.4121	6.48338	1.74727	14.6934	9.26772	0.549277	3.27681					3.5094	1.30263	3.18531	0.152092	2.97253	12.2409	2.72678	0.249567	1.41969	0.615918	2.11464	0.101814					0.365685	11.6984	1.06286	0.0481862	0.541036	1.84916	0.308268	0.127671	0.474685	1.17702	0.124553	1.06777					0.0164546
	0.303172	25.9488	1.3212	0.381296	1.23107	17.0063	6.28408	1.00012	14.4213	13.3485	1.61758	3.77502					4.42678	1.76138	3.21707	0.0924383	2.34156	13.7545	2.45468	0.322179	1.07108	1.85368	1.03775	0.273816					0.0790045	17.2154	0.572561	0.0374111	0.934389	1.63078	0.309877	0.0705893	0.418491	0.707423	0.0293561	1.25319					0.063046
	0.234411	26.3975	0.789866	0.528285	0.325705	14.7376	6.64231	1.5158	16.9419	13.9221	1.68337	5.05529					4.42737	1.6964	3.50064	0.522372	2.78758	13.5908	3.75663	0.558811	0.499841	1.61942	0.999779	0.290176					0.287171	23.4874	0.259888	0.150146	0.802767	1.2683	0.249233	0.470144	0.457128	0.319672	0.227419	1.03997					0.031201
	0.702076	25.9638	1.32316	0.175159	0.879539	15.6956	7.97191	1.30477	14.1055	15.0873	1.16587	4.70873					4.66881	1.82585	5.61761	1.42819	2.89956	14.607	2.06337	0.185698	0.70127	2.26593	0.688544	0.0901575					0.239942	28.179	0.319724	1.28699	0.7061	0.932633	0.225196	0.747086	0.228163	0.645688	0.0723145	2.55649					0.102431
	0.571401	25.6317	1.5245	0.250531	1.52512	15.7595	11.3207	1.50108	20.3023	23.4694	1.00574	6.83621					6.30659	1.67308	4.07159	1.42814	2.15935	14.0593	1.59887	0.411955	0.909838	2.00897	0.408182	0.302991					0.329104	26.962	0.0955955	0.926145	0.954848	0.716364	0.35636	0.291679	0.211958	0.563182	0.115044	2.16655					0.0775431
	0.585192	24.1361	1.69012	0.330826	1.42588	15.4848	13.3504	1.84693	17.0352	17.0589	2.14195	7.91431					6.11931	2.11606	4.95478	1.83243	0.947696	14.2071	1.80376	0.189101	0.894884	1.999	0.250666	0.299499					0.192442	25.4603	0.654792	0.906025	0.596419	0.957701	0.271877	0.173347	0.0571104	0.366182	0.294516	2.15089					0.0913746
	0.524151	23.6193	2.858	0.0628794	1.44454	16.6492	16.5399	2.04971	20.8121	17.1788	2.00642	8.02119					7.72352	1.55396	4.03406	2.47608	1.08157	13.0365	0.573274	0.598791	1.78399	1.78565	0.547448	0.100871					0.158205	22.7427	0.972855	0.666688	0.338822	1.2656	0.169509	0.718253	0.127478	0.259053	0.75196	2.12265					0.0604471
	0.549096	24.1574	3.5789	0.0489457	1.83167	15.5631	18.1797	3.3185	19.5921	14.948	2.42029	8.31989					9.11511	1.53063	5.26349	3.13035	5.02753	14.1852	0.565971	0.307503	2.09871	2.13838	1.44782	0.14077					0.173158	19.0336	1.42458	0.492444	0.416587	0.552425	0.087987	0.920468	0.161854	0.0966369	0.245275	1.66811					0.118707
	1.33601	22.6537	2.88725	0.132041	1.10986	14.1404	22.4713	2.02811	21.804	12.1817	2.46769	13.375					12.0488	1.42328	4.68527	2.77109	5.2814	13.7406	0.620899	1.06896	2.09951	2.32555	1.10755	0.192197					0.388297	19.2168	1.22615	0.434138	0.356261	0.819444	0.197884	0.913862	0.076078	0.121259	0.0727273	1.68502					0.0579104
	1.51791	20.1203	2.5974	0.0568787	1.2683	14.5967	22.6326	2.20599	19.4643	8.01057	0.321159	5.40141					11.4381	1.39215	6.17595	3.68441	5.08415	14.7005	0.630181	3.27728	2.35834	1.58519	0.28232	0.0875656					0.210104	18.743	0.609184	0.246245	0.408319	0.759679	0.0212574	0.762858	0.0210871	0.0461069	0.55024	1.62753					0.0655571
	0.29915	22.6137	2.98121	0.121892	1.48111	13.8021	24.0349	2.87167	19.0642	5.79575	0.991969	7.62477					13.93	1.36816	4.91956	3.55136	5.01838	14.7804	0.516798	1.23545	2.10562	1.38825	0.591492	0.445043					0.265921	20.0697	0.673508	0.2478	0.644706	1.00363	0.0392181	0.412027	0.10824	0.0498798	0.0145081	1.04152					0.0587785
	0.650873	21.2531	2.89563	0.0833149	0.426317	10.5117	24.4578	2.87449	14.3293	4.13294	0.675794	9.64484					13.7879	2.07428	6.99397	3.65549	4.46382	14.477	0.509225	1.09493	2.78255	3.36446	1.00538	0.396291					0.191191	19.9129	0.470168	1.02009	0.554335	1.01471	0.130849	0.472844	0.074464	0.0332137	0.0763651	1.00498					0.0416651
	0.988847	17.2203	2.56037	0.504779	0.231257	8.76948	25.5752	5.65415	16.0573	2.34897	0.0517032	6.63154					11.4824	1.36793	7.89488	3.75035	3.14966	13.2915	0.540194	0.695023	2.58599	5.12148	0.714443	0.366455					0.151719	21.8038	0.347545	0.588683	0.202853	0.622771	0.233151	0.308953	0.0834301	0.170176	0.146546	0.676143					0.0147604
	1.27026	18.7884	2.39928	0.282383	0.209889	6.23992	26.6133	7.57655	9.83527	1.62677	3.89138	7.54511					11.2776	1.0311	6.96548	3.2488	3.02147	10.7042	0.42428	0.834535	2.64231	5.90997	0.999603	0.251872					0.206387	23.1193	0.111614	0.427949	0.201894	0.682055	0.109781	0.656835	0.10568	0.0496886	0.343156	0.622677					0.121702
	1.66857	17.7801	3.5009	0.0879746	0.251065	4.92679	26.0396	8.3741	2.39907	0.739728	5.46976	4.42295					13.1381	1.37555	6.19913	3.26434	3.30231	8.81098	0.408487	1.27415	2.41045	6.93521	0.902685	0.152496					0.686843	23.3991	0.332067	0.366248	0.157857	0.904759	0.0754202	0.681934	0.136657	0.0355395	0.0909403	0.938459					0.0382537
	1.78425	19.4168	4.80056	0.24644	0.562742	1.97727	25.9409	6.67733	0.708881	0.886147	8.67812	0.816977					11.0718	1.14476	9.32334	3.628	2.36549	6.59413	0.392184	3.83713	2.53187	7.8367	0.915199	0.313123					0.280466	21.5255	0.353186	0.214137	0.0381855	0.239783	0.0422614	0.582716	0.199994	0.0525672	0.453867	2.57056					0.0508042
	1.15277	14.2644	5.40999	0.00136942	0.715448	1.49382	23.5545	5.87297	2.04775	0.360084	8.97338	1.59397					12.3416	0.915118	3.79237	3.58075	2.43893	4.94882	0.202429	5.18633	1.88214	10.2493	0.950948	0.257369					1.22894	18.1835	0.567487	0.224875	0.19989	0.481108	0.0310124	0.823547	0.204789	0.00524722	0.143037	1.91182					0.109903
	0.25491	9.12278	6.61403	0.308875	0.379057	1.28442	21.7504	3.59271	4.23005	0.432695	8.20116	0.824715					11.7457	1.32853	6.55168	2.58729	2.53646	4.75746	0.354519	7.86147	1.04556	9.25909	1.21821	0.089136					1.11298	16.2315	1.19534	0.167027	0.173101	0.774397	0.142608	1.00507	0.241963	0.0347971	0.186569	0.435993					0.0450285
	0.26797	5.62179	6.10113	0.265045	0.730004	0.657896	19.5056	1.43512	4.70415	0.251266	7.02748	0.355796					16.1876	3.10163	5.51801	1.97104	2.10134	4.89683	0.191531	9.52313	1.42771	7.63282	0.761146	0.218131					1.36536	13.515	1.16199	0.126863	0.426851	0.743969	0.090121	0.838635	0.255132	0.0776957	0.199744	1.67092					0.0663015
	0.561976	3.17271	7.54631	0.271593	0.780564	0.671329	17.6517	0.428477	2.87767	1.26125	4.5852	0.351276					17.1535	3.35013	7.47178	0.786276	2.25331	4.64801	0.239747	10.7058	1.12049	5.96908	0.810551	0.370074					1.25525	10.1529	1.07955	0.0539379	0.26057	0.67409	0.0608491	0.969803	0.286648	0.0700268	0.485386	2.98143					0.0220342
	1.37274	1.88636	10.6501	0.201907	0.534245	0.220314	19.9219	0.614095	3.45942	0.649741	4.24681	0.592289					14.6934	1.90624	5.59618	0.644536	2.7774	4.67951	0.211177	11.8006	0.975242	4.89608	0.896127	0.56419					1.0912	9.98788	0.986629	0.0452733	0.184249	1.10024	0.00427371	0.588832	0.184805	0.115642	0.493908	3.42253					0.0456796
	0.930599	2.97552	8.76345	0.137829	0.355945	0.329896	19.376	0.513063	3.0679	0.55476	3.53568	1.61049					16.0948	1.83324	4.91633	0.933627	2.81274	3.18081	0.176444	10.874	0.664222	3.29698	0.183108	0.611701					1.03023	6.31966	0.765367	0.0507944	0.113083	0.892982	0.0411129	0.33066	0.108617	0.0457048	0.224916	6.98077					0.0965915
	0.643411	3.08166	7.60178	0.236774	0.455429	0.363905	20.2062	1.80151	4.02355	2.92515	2.98928	0.968672					12.7146	1.39918	5.52123	1.21782	2.2098	1.64636	0.163823	10.3299	1.43215	2.44302	0.291019	0.2179					0.918656	4.33647	0.358121	0.0289096	0.146952	0.732533	0.121229	0.340736	0.022641	0.195011	0.183491	5.25898					0.0702282
	0.826983	3.54289	8.80702	0.155781	0.34116	0.419609	18.1341	2.97158	2.97276	5.65094	2.85299	1.9238					12.0354	1.1407	4.79524	1.82251	2.26092	3.12327	0.104975	8.62759	5.27117	1.39327	0.410299	0.595022					1.04	2.35099	0.629076	0.0530664	0.223634	0.387339	0.0700388	0.390914	0.0778301	0.12703	0.0727434	4.89582					0.00767553
	0.392786	3.59847	7.0955	0.153507	0.238439	0.540443	18.9073	2.34944	2.39127	6.19526	5.94091	1.78303					11.7977	0.78152	6.4544	1.8386	1.72955	1.19708	0.0478255	8.76382	5.89373	1.65418	0.256263	0.38178					0.710892	1.66039	0.637746	0.0107919	0.0625601	0.424879	0.0434648	0.381479	0.0583204	0.14501	0.251398	3.57204					0.0227
	0.299756	3.2113	6.30313	0.14053	0.35773	0.257606	18.1263	4.18919	1.89342	5.96579	7.87885	3.62125					9.97524	0.502746	6.53036	2.46281	3.21673	0.850761	0.40691	7.86175	5.02646	3.0397	0.423429	0.0836964					0.572019	1.31385	0.556925	0.0335446	0.138429	0.377233	0.0176624	0.45593	0.0268022	0.0333152	0.0291768	3.17617					0.0768108
	0.162287	2.99224	6.46704	0.137864	0.44733	0.0690763	17.8594	5.97501	1.32393	6.69107	9.95726	3.86238					8.7888	0.343279	6.48112	2.28923	3.80779	0.672096	0.211489	7.81011	4.10012	5.76912	0.399255	0.749613					0.525883	1.20858	0.340183	0.0156876	0.083928	1.09536	0.0356472	0.4148	0.0749621	0.0348846	0.641006	1.68292					0.147465
	0.0950639	2.37497	6.18598	0.143275	0.977352	0.803656	14.1878	7.91295	0.752971	6.90828	17.8205	3.85369					10.8957	0.162533	4.08431	2.14064	5.65827	0.387183	0.284271	8.81315	3.09963	6.28159	0.315342	1.83374					0.428414	1.02593	0.459746	0.0310997	0.0848525	2.51426	0.0899059	0.292391	0.0622933	0.0137443	0.368407	1.35288					0.10728
	0.607553	1.69557	4.24961	0.171508	1.56272	0.289311	14.9585	10.5156	1.01804	7.70402	14.6323	3.86459					8.85528	0.396366	4.63518	1.82414	4.02585	2.03559	0.329573	11.9726	2.18551	6.5682	0.470287	1.46659					0.301301	1.10347	0.3528	0.0258327	0.0691339	2.32729	0.0326605	0.449811	0.132216	0.0716468	0.266209	2.87323					0.0191556
	0.497821	2.54097	4.19794	0.315592	1.16149	1.64463	11.2735	12.7902	0.592926	9.81221	18.2047	2.73588					10.4312	0.478018	5.23001	1.48494	5.00482	2.10155	0.57585	13.7953	0.94748	7.39261	0.380167	1.12579					0.288128	1.18229	0.354308	0.036501	0.0721871	2.56905	0.115487	0.452528	0.0299582	0.0441885	0.0808402	2.54014					0.0462863
	0.656225	0.435465	3.36409	0.142875	0.668005	1.08609	9.47376	16.6173	0.844264	12.2789	19.9267	2.13042					9.98643	0.702308	5.21659	0.972948	5.21576	2.22626	1.50017	13.7708	0.708711	7.67766	0.270454	1.68006					0.352212	0.911232	0.392867	0.0168523	0.123008	1.95903	0.00481137	0.385791	0.189728	0.0466528	0.207831	1.35007					0.0956023
	0.401218	1.64117	1.88535	0.162779	1.15947	0.839256	8.0279	18.8689	0.428082	15.3945	23.79	1.83254					11.1069	1.09689	7.95347	0.469915	3.7901	3.17481	1.13182	16.2193	0.852524	10.6326	0.282741	1.88019					1.59895	0.567377	0.438794	0.0477609	0.120307	1.58672	0.163694	0.408354	0.161134	0.141214	0.054446	1.64776					0.0373833
	0.446839	0.469661	1.37054	0.132201	1.02669	0.5599	6.61481	20.5807	1.0285	19.0519	26.0546	0.991314					10.6687	1.07527	7.95221	0.289877	3.65963	2.68244	0.780078	20.4549	0.425944	9.77877	0.409158	1.71761					2.38457	0.531728	0.210034	0.0694619	0.0609917	1.56322	0.0253884	0.167244	0.11321	0.106653	0.133855	1.04655					0.0926986
	1.01424	0.526276	1.19008	0.348113	0.940994	0.727556	3.98956	23.2758	0.83322	22.0805	26.7748	1.2117					11.2982	1.60234	8.5694	0.258807	4.9932	2.41738	0.813101	20.487	1.00579	13.5501	0.605379	1.61611					3.11655	0.623912	0.197074	0.0480156	0.0767297	1.47158	0.0667089	0.184789	0.882444	0.197258	0.22251	1.8616					0.0228477
	0.796353	0.341106	1.06785	0.298954	0.864283	0.850197	2.70436	20.6861	0.754411	24.6853	30.0198	1.37975					8.85777	1.57	8.25987	0.269257	5.06797	2.66885	0.943973	22.4542	1.37503	15.9081	0.255709	1.14245					2.80056	0.324725	0.119714	0.0300618	0.0523056	1.38833	0.0150384	0.160143	0.11264	0.147006	0.551442	2.42124					0.00363386
	1.03251	0.669333	0.884053	0.259898	0.758055	0.614205	1.61568	22.4394	0.475699	25.555	31.4486	1.65391					10.3589	1.57384	8.82782	0.101233	8.35076	2.80822	0.863342	22.8722	2.66249	18.3793	0.218908	0.674813					3.80359	0.219105	0.11018	0.180138	0.0167485	0.838256	0.108724	0.101129	0.818076	0.044096	0.367088	2.76968					0.0679384
	1.06232	0.928135	1.56156	0.40932	0.717277	0.922336	1.51801	23.3296	1.87285	21.3801	33.7356	2.01724					7.4591	1.53414	8.07052	0.15698	9.26067	1.58203	0.540448	21.7028	1.98084	21.0714	0.0907191	1.20322					3.19511	0.874818	0.0778747	0.859778	0.188864	0.615421	0.109699	0.143343	0.612772	0.0669083	0.39884	5.33516					0.0282566
	0.984058	2.18523	2.39329	0.29391	0.232308	0.887007	1.69512	21.8304	0.847413	18.514	29.0055	1.97398					7.22784	1.48784	8.24814	0.146285	7.68887	4.19722	0.932043	25.0264	2.53853	19.0272	0.407598	1.58679					2.45857	1.56121	0.056374	0.75033	0.0600015	0.561932	0.0510429	0.0502251	0.89105	0.0112266	0.450405	4.95583					0.0979485
	1.17518	2.27813	3.89388	0.107051	0.7191	1.78601	1.55578	23.1485	1.11902	16.7363	30.8305	1.72571					5.93072	1.4282	7.66989	0.200088	10.4981	2.42482	1.33174	24.4937	3.74479	17.9519	0.399516	1.72725					1.6587	3.15137	0.0283498	0.819749	0.0302813	0.381947	0.0238399	0.0667354	0.696631	0.0899693	0.467864	5.67003					0.192076
	0.960564	3.07758	6.31427	0.206732	0.692977	2.46952	1.53346	20.1023	1.00306	13.5823	29.7701	1.57508					5.63474	1.30352	11.3172	0.229183	8.60098	2.60265	1.18298	23.6773	2.97945	15.6034	0.683285	1.91948					1.47515	5.7286	0.0886678	0.749195	0.0115044	0.392484	0.0637517	0.0696821	0.941925	0.0281223	0.305525	7.79912					0.139837
	0.690241	3.55474	9.65333	0.152958	0.122914	2.10324	1.62287	22.055	0.743022	12.1963	25.4412	1.02937					4.27086	1.11243	7.45657	0.138618	11.0613	2.46915	1.52082	23.5028	7.38954	15.9122	0.0947752	0.640738					1.07733	4.45711	0.12209	0.507811	0.0683063	0.378371	0.051247	0.167838	1.37663	0.0656873	0.177232	7.03252					0.0588694
	0.387399	3.83696	12.6591	0.150383	0.580936	2.50369	1.72803	18.7745	1.07568	9.76273	28.4001	0.48586					4.00772	0.187224	7.18839	0.269575	11.9458	1.79445	1.56413	22.3918	5.38599	13.0941	0.0597075	3.50945					0.987178	4.78453	0.0117774	0.364474	0.0248817	0.223165	0.130431	0.0775512	1.29607	0.00353609	0.533244	6.92798					0.0118021
	0.261104	4.27463	14.4913	0.134152	0.167	2.00104	0.984302	18.8602	0.698423	6.03861	24.8565	0.428408					2.91626	0.630383	7.63122	0.187282	10.439	1.77535	1.55282	21.2046	3.96389	7.88658	0.337191	1.64175					0.882863	3.3675	0.0846078	0.413056	0.087642	0.249188	0.0443936	0.255946	0.863525	0.0233259	0.145103	7.11795					0.0892264
	0.918589	5.55398	16.3324	0.332088	0.291942	3.01384	0.934581	14.2247	0.527729	4.52634	22.2694	0.851559					2.68956	0.0898114	7.8562	0.194396	8.76529	2.12533	1.33006	20.0683	4.35445	5.7194	0.559864	1.83454					0.357085	3.34197	0.425585	0.616573	0.0432565	0.155492	0.460562	0.24193	1.74804	0.15195	0.251819	6.18513					0.0648149
	1.49432	5.40281	17.2827	0.268315	0.743565	4.13457	0.832778	11.4542	0.539554	2.93598	22.2738	0.983039					2.30647	0.484422	6.3291	0.0680958	7.79755	1.83858	1.12965	19.5716	5.38265	3.1861	0.544324	1.87253					0.0971773	2.26226	0.341748	0.176341	0.071088	0.217134	0.2438	0.0995761	1.97513	0.0605587	0.313101	3.12604					0.0210015
	3.02499	4.90284	17.6106	0.052007	0.505956	2.38237	0.522766	7.04121	0.882905	1.74774	22.4618	1.06821					3.39336	0.669029	6.01158	0.11664	6.51867	1.83823	0.638596	17.9399	4.8981	1.73911	0.623881	1.5277					0.366564	2.41385	0.233544	0.520017	0.0827954	0.247262	0.315952	0.53833	1.41336	0.0416846	0.570384	6.93505					0.0517381
	3.45436	4.73005	18.5163	0.349319	0.215897	2.59329	0.324881	5.14803	1.76288	1.76316	18.7751	2.22534					3.80633	0.705316	4.67043	0.137959	6.81179	1.85381	0.468112	17.847	4.40618	1.80797	1.34836	1.66836					0.254547	2.21832	0.190215	0.278976	0.529063	0.102569	0.226488	0.512992	1.49969	0.111257	0.600404	7.52098					0.00845097
	3.61382	6.10266	18.815	0.497078	1.13836	1.76168	0.254124	4.36083	4.36934	1.89944	20.3923	2.40047					5.74656	0.988295	5.0346	0.0855078	6.65941	1.87483	0.32162	17.5592	4.94232	1.21796	2.43252	1.89022					0.292859	1.51662	0.13341	0.412565	0.991092	0.105205	0.168195	0.480218	2.99223	0.100705	0.899576	10.0701					0.0522257
	3.59552	6.22886	17.9158	0.675991	0.485078	1.54206	0.293908	3.20614	1.27845	1.76729	19.0157	1.56801					4.88063	0.900844	3.86532	0.018667	5.61361	2.2133	0.22958	18.8859	3.25126	1.25758	1.47165	1.57291					0.185419	1.32676	0.126335	0.249941	1.30197	0.201824	0.066906	0.183052	3.83829	0.0368578	0.527009	9.2762					0.0427848
	3.68997	5.00193	15.0453	1.01374	0.816072	1.45641	0.347134	2.19802	1.18471	2.76863	18.1222	1.79833					4.61299	1.10397	1.76664	0.0889282	5.60689	2.25455	0.16367	23.6813	1.90386	1.34272	0.621026	2.03473					0.299144	1.1066	0.0998732	0.339564	2.15609	0.155591	0.0935769	0.0421009	5.25591	0.0821903	0.385942	7.67498					0.0949396
	4.48176	4.14149	16.9647	1.47872	0.60909	2.26227	0.223189	1.25649	0.70985	4.07179	17.1352	2.0321					4.14668	0.911431	1.08734	0.0422566	4.68306	2.08923	0.174464	17.7404	1.32495	1.38925	0.16658	1.33449					0.355733	0.709703	0.0387498	0.565485	2.51895	0.0707166	0.067386	0.051537	5.00732	0.0712078	0.50086	4.91867					0.0133637
	4.74886	3.49785	16.7381	1.14086	0.40375	2.61153	1.0264	0.730446	3.09082	5.252	17.4488	1.73423					3.52176	1.00166	1.00982	0.0291209	5.17104	1.63129	0.0117635	16.7212	2.16046	1.26877	0.227688	1.09064					0.0519925	0.551792	0.0702854	1.06687	2.08548	0.048222	0.0547521	0.0805615	7.38575	0.0386071	1.04348	3.21298					0.0172522
	7.06953	3.78264	19.2499	1.21024	0.415416	1.83089	0.342141	2.14396	2.60098	6.07055	18.4356	1.34773					4.06627	1.50256	4.88699	0.0268893	5.35642	1.00326	0.0841112	15.3007	0.835537	1.13221	0.17211	0.649103					0.398138	0.428368	0.0553427	1.13335	1.85888	0.0565252	0.0332257	0.113447	5.71092	0.165972	1.48241	2.28127					0.0165678
	8.11481	1.9674	16.1336	0.80876	0.530864	1.74348	0.414117	1.26509	3.22173	9.59595	17.0178	3.69931					6.60174	1.10284	1.80112	0.0461349	5.03337	1.32554	0.233022	14.6718	1.04734	1.29285	0.196826	0.730668					1.27222	0.34481	0.0424605	1.37294	1.65188	0.0696683	0.0243365	0.099231	6.41099	0.0470986	1.74885	1.98743					0.0450963
	8.12208	5.48952	16.36	0.959381	0.863018	1.1565	0.177861	1.9731	3.38108	11.846	17.2392	3.23218					7.43412	1.38065	1.80584	0.0459152	4.33289	1.42105	0.173607	14.254	0.831094	1.69449	1.47661	0.335871					1.50938	0.183967	0.0491807	1.11387	1.21182	0.126914	0.107199	0.0835913	8.03705	0.123261	1.66351	0.444806					0.0270572
	8.43702	4.66663	15.6497	0.650128	0.711568	0.951263	0.335878	1.51239	2.86084	14.3695	17.0286	3.96653					7.61218	2.12652	1.5109	0.104287	6.0596	1.49002	0.0334552	15.0126	0.976422	3.6428	0.784788	0.486253					3.30871	0.204463	0.171838	0.969521	1.36019	0.0540051	0.217842	0.292915	5.96569	0.0563977	3.22192	0.473674					0.0118053
	8.49003	4.18075	10.9994	0.380803	0.521972	1.24534	0.874589	1.8713	2.77205	15.4272	12.8133	4.45368					7.16742	1.62741	1.02439	0.443668	4.04401	1.83706	0.174324	14.5216	1.25487	4.91351	0.620285	0.440835					1.69614	0.253252	0.0183192	0.440011	0.737854	0.131676	0.0555737	0.109662	5.12366	0.0167718	2.37789	0.841305					0.0528472
	9.15217	4.61696	7.66073	0.336819	0.811976	0.602161	1.92259	2.47139	1.0668	16.6787	9.96498	3.28321					7.41967	1.27273	0.603601	0.144072	2.84393	1.40169	0.0990435	19.1041	2.04871	6.46379	0.415589	0.558651					1.53305	0.171159	0.0505624	1.1127	0.69777	0.00713679	0.0217319	0.15522	4.47579	0.0382613	2.26205	0.640593					0.00476931
	8.9156	2.70431	6.26499	0.103733	0.466904	0.392146	3.04934	4.72905	0.924631	15.5549	9.5972	2.05556					9.4144	0.990938	0.541417	0.202466	0.478363	1.59815	0.119561	9.49871	1.91166	6.81161	0.572432	0.278102					1.21636	0.11785	0.0410958	2.47975	0.50422	0.172939	0.00915204	0.164705	4.395	0.0552125	2.06166	0.729981					0.0199958
	10.1069	4.05274	2.92062	0.0504686	0.591928	0.336532	3.80387	8.05763	2.57879	11.7267	6.57504	4.4855					8.60741	0.824191	0.921644	0.13107	0.687403	1.20605	0.179488	11.6032	1.00337	8.62122	0.308217	0.880915					1.03847	0.189437	0.0119875	2.43202	0.32395	0.0459442	0.0773683	0.125212	2.43943	0.0249737	1.46699	0.619165					0.0507017
	8.27607	3.93347	2.46588	0.110788	1.0238	0.325512	5.34152	8.63255	1.50958	9.07904	4.61314	5.15207					7.7806	0.629022	0.407947	0.153088	2.19037	1.2176	0.897391	15.5639	2.28778	9.31261	0.625101	1.57176					0.857815	0.108372	0.0679976	2.03264	0.368109	0.132234	0.0768727	0.135478	1.72205	0.00609391	1.42319	0.0843803					0.0732783
	6.63486	4.91884	0.895698	0.115705	0.335546	0.555194	8.0559	7.3808	2.9253	6.30581	2.96103	6.372					9.43269	0.789409	0.55149	0.0701064	1.262	1.38679	1.91438	11.8839	2.27639	10.3227	0.555338	1.98991					0.647983	0.0961346	0.225352	1.13809	0.732433	0.0679224	0.0352258	0.136622	1.95972	0.147425	1.39678	0.548442					0.115158
	4.60866	4.02419	0.161146	0.329998	1.20698	0.349284	6.58932	6.32547	2.71433	7.35661	2.60218	5.30169					7.39415	0.618155	0.846242	0.0251548	0.881988	3.13718	3.27279	9.76518	1.79457	10.9417	0.369115	0.983845					0.285588	0.0450444	0.0553715	1.25689	1.09347	0.0773573	0.105025	0.1807	3.75614	0.0631326	0.925367	0.216669					0.174576
	6.23232	3.26371	1.15714	0.609579	0.614045	0.741064	9.071	6.37069	2.83311	7.27518	4.92598	8.38915					7.11494	0.566794	0.830985	0.0244859	0.814621	3.84507	3.21538	7.99346	2.95479	6.8062	0.230821	1.03105					0.530393	0.172843	0.0194216	1.47331	0.294492	0.0388744	0.0237196	0.148765	1.6016	0.0180322	1.07454	0.232397					0.14876
	4.30536	1.41346	1.66849	0.269948	0.926016	1.4318	6.8624	5.47096	2.81993	7.43243	2.12593	6.65832					7.64821	0.414216	0.597293	0.108287	0.744201	3.98576	1.90028	3.53704	2.19703	5.84607	0.188414	0.675688					0.774867	0.0719092	0.0344046	1.44599	1.00685	0.118518	0.0220831	0.251075	1.32156	0.0118219	1.6702	0.58218					0.133273
	4.76114	1.50465	1.94853	0.290751	0.46675	4.72792	6.04033	5.60846	1.95928	8.0173	2.24929	6.92731					10.1314	0.672943	1.24278	0.121203	0.672346	4.45243	1.56452	3.61972	1.32472	5.6747	0.122951	0.873369					1.42809	0.0583794	0.0487417	1.95385	0.701311	0.0802173	0.0143033	0.117723	1.28987	0.0945337	0.883093	0.588735					0.0272736
	4.81315	0.282536	1.32154	0.208075	0.669222	2.75211	5.91785	6.12368	0.537826	7.02082	1.57181	6.34924					8.69879	1.48549	0.336618	0.0349319	0.718951	3.40002	4.30118	3.12246	0.645596	5.12827	0.132793	1.34031					3.83138	0.0511031	0.06787	2.98139	0.604495	0.0838342	0.0404741	0.36641	1.02027	0.0545766	0.546315	1.50433					0.0772018
	5.74276	0.628895	5.54454	0.277373	0.54013	3.2154	4.64976	4.13628	0.62645	8.51049	1.79666	5.67431					10.0167	1.18762	0.543291	0.568844	0.61388	2.42367	4.43929	2.44877	0.675744	4.52648	0.0377824	1.63493					2.48989	0.120466	0.292059	2.82438	0.49879	0.143281	0.0376865	0.528389	1.22568	0.0880794	0.404356	2.03377					0.0761085
	5.26498	0.922433	4.16952	0.217095	0.169176	3.90887	3.22152	3.62691	0.39582	7.16826	1.77841	3.56224					10.9206	2.50892	0.429914	0.17093	0.717694	2.1735	7.55894	2.80176	0.477137	11.1582	0.243461	1.79017					2.38879	0.0350074	0.0630252	2.50879	0.802253	0.0339468	0.0953965	0.708021	1.15157	0.0408011	2.49825	1.52979					0.0321267
	6.37761	0.906822	3.29845	0.716414	0.516762	3.66469	2.59706	4.43119	2.34844	4.18478	1.68817	2.79386					13.2171	2.78503	0.20185	0.24971	0.817456	2.6209	10.1868	2.17248	0.536273	6.58299	0.301913	2.83515					2.44845	0.116944	0.0260457	3.25688	0.260845	1.03385	0.0782591	0.885672	1.22618	0.0721271	3.87927	0.923908					0.0238152
	4.91422	1.98447	4.46726	0.60787	0.595235	3.17943	1.44719	3.67183	2.20447	2.79625	1.51879	2.47754					12.7594	2.29355	0.158712	0.224142	0.60247	2.51829	10.1577	1.9945	0.367868	4.86175	0.27247	3.02814					2.34026	0.238655	0.0447068	4.22658	0.313127	3.5555	0.14549	1.34194	1.8721	0.0784379	3.95344	0.892849					0.0308021
	7.60816	1.32444	4.30156	0.489618	1.38032	3.9839	0.979193	2.84368	2.47117	1.36429	1.34016	1.5253					9.54117	3.34181	0.142963	0.372622	0.13156	2.2943	9.80686	1.46674	1.27434	3.80421	0.564987	3.57864					0.493754	0.650705	0.123388	5.07052	0.189409	2.92651	0.649712	1.66251	2.95719	0.0528798	4.73604	0.646853					0.0439783
	7.16429	0.715991	1.9979	0.740062	0.807423	1.99942	1.10176	2.41604	2.44853	1.07467	1.05019	0.92044					10.9457	4.28743	0.311047	0.276083	0.402441	2.03709	8.91391	1.22332	0.142276	2.35594	0.493912	3.49035					1.95961	0.251014	0.0812195	5.49684	0.297701	4.02078	1.74807	1.48842	2.29234	0.0572286	4.41273	0.536562					0.0779703
	9.6432	0.690022	1.80035	0.764674	0.523117	1.50845	1.16311	2.29442	0.338443	0.952175	0.997324	1.14399					8.03149	3.42773	0.247798	0.114572	0.236273	1.76513	10.5463	0.974482	0.176698	1.74646	0.293928	2.85856					1.27153	0.0951827	0.306343	4.72222	0.404604	2.49416	1.61244	0.940323	3.11129	0.0426792	3.70897	0.336487					0.214019
	8.35243	1.0442	1.30676	0.785624	0.804434	1.21443	0.989938	1.98399	1.59644	1.34915	0.617577	1.00616					6.23535	2.69269	0.0548134	0.784416	0.118725	1.57705	9.46734	1.0413	0.13176	1.11841	0.316551	2.08902					0.769713	0.0234718	0.158054	4.70423	4.09325	2.42424	0.672163	0.732367	0.994075	0.0728021	2.65927	1.05491					0.152602
	8.42674	1.49673	1.0617	0.6687	0.634168	0.26946	0.805025	2.14337	1.14843	1.43871	0.803484	1.27637					5.39474	2.22293	0.30006	0.767669	0.0765617	1.08498	8.07275	1.27498	0.17606	0.451392	0.205588	2.28587					0.456064	0.0693209	0.181383	5.22166	4.26912	2.09965	0.817908	1.18053	3.52591	0.0576261	2.24731	1.88189					0.0322285
	7.99408	0.746797	1.2682	1.00463	0.665559	0.446619	2.35189	1.84362	2.35354	1.4042	1.06466	1.59934					4.5309	2.13487	0.0752655	0.688896	0.114316	0.696862	8.77418	0.644454	0.15862	0.107606	0.253359	2.242					0.467469	0.0464052	0.487046	5.26003	4.02276	1.10764	0.922046	0.884127	3.20323	0.00326927	1.41384	1.66817					0.0309479
	8.74956	0.133531	0.272369	1.54073	0.274914	1.06431	2.20953	1.72842	3.78888	1.19645	1.11861	2.24235					4.98531	1.56104	0.447375	0.443954	0.411429	0.451448	8.7357	0.884786	0.150057	0.363433	0.314621	2.26332					0.454502	0.0657304	0.423604	3.0365	3.01519	1.67652	0.480822	0.433061	3.67006	0.0891534	1.03865	1.46859					0.0264872
	7.11435	0.374327	0.534514	1.6209	0.819448	2.84939	1.09416	2.88462	4.75287	1.29127	1.36242	2.53138					3.12287	1.81066	0.283586	0.0542132	0.717694	0.283652	7.10078	0.855342	0.23735	0.456598	0.217159	1.73718					0.394114	0.49081	0.105083	4.38688	3.62013	2.34745	0.347631	0.226358	3.57844	0.188358	0.95848	0.566073					0.0733511
	5.03179	1.08419	1.27764	1.94789	1.02217	3.56668	1.6126	1.1086	7.23083	1.47941	2.71517	1.93719					3.10672	1.87	0.251218	0.496862	0.890632	0.22297	5.91652	0.692906	0.181631	0.49248	0.446472	1.88971					0.395171	0.265692	0.125832	4.85415	2.24584	3.52453	0.340425	0.0223019	2.90844	0.188234	0.862918	2.72166					0.0703683
	3.09288	1.24215	1.24889	2.2129	1.52068	6.4284	1.2918	0.801487	9.35357	2.57608	1.13346	0.799897					1.56661	1.89008	0.0914698	1.10816	2.01691	0.0916584	3.7266	0.53832	0.214691	0.553967	0.756082	1.72663					0.402015	0.104464	0.0850376	2.96457	2.04524	4.64105	0.608053	0.0725993	3.29657	0.033132	0.338649	2.78117					0.0954908
	3.3198	1.11483	2.66429	2.43826	0.851685	5.53516	1.43792	1.9791	10.5966	3.76545	1.73806	0.417738					0.455471	2.4712	0.0930931	0.82379	2.06955	0.207289	1.47521	0.474098	0.248769	0.390736	0.513701	2.06616					0.384087	0.428491	0.0513668	2.85549	1.69778	3.84641	0.490275	0.0636619	3.31373	0.0654141	0.14327	3.36579					0.0518856
	4.17608	0.572113	2.84159	2.5174	0.105969	5.25578	1.8981	0.867975	13.5238	4.72362	1.44047	0.513768					0.367396	3.20136	0.399038	0.878631	1.8004	0.192779	0.507266	0.254944	0.0573944	0.449563	0.324001	2.80512					0.24082	0.0653171	0.0361757	2.48788	1.35082	3.24106	0.667557	0.218805	2.93309	0.0878093	0.415462	5.75692					0.0440708
	4.58341	0.493341	3.05559	2.09489	1.08032	7.42883	2.14752	0.883264	19.0708	6.75678	1.54871	0.475269					0.616388	3.83064	0.40528	0.956897	1.442	0.220414	3.49141	0.302315	0.176269	0.449379	0.230043	3.81303					0.227301	0.0495595	0.087217	2.25978	0.905343	3.78771	1.07063	0.303771	3.01151	0.0126484	0.458269	7.63423					0.025558
	4.04784	0.814201	8.90299	2.32848	0.879684	8.86151	2.61244	1.13949	22.3137	6.38061	1.53255	0.527645					0.535609	3.45377	0.1113	1.0275	1.61634	0.129932	3.31162	0.135993	0.155031	0.57334	0.244087	2.35567					0.178572	0.535637	0.0116838	1.14145	0.733576	4.45193	0.897139	0.301661	2.87361	0.113418	0.649804	7.95925					0.0589045
	4.0478	0.370863	8.71324	2.48249	1.06652	7.94284	2.65355	0.703337	24.4251	9.45653	0.702543	0.341946					0.616983	3.57858	0.459724	0.487888	1.11564	0.209727	4.25119	0.165181	0.0644272	0.373156	0.17078	2.77925					0.128818	0.937351	0.0225857	1.53222	0.564221	5.22198	0.592998	0.194614	2.0653	0.0475603	0.468048	12.5298					0.0274906
	2.39565	1.2532	6.53778	2.58355	1.13872	11.5383	7.13283	0.856184	25.1297	5.62941	0.791207	0.277894					1.10306	5.33427	0.0845102	0.546556	1.28223	0.183988	2.28078	0.175559	0.0786074	0.188151	0.0237693	3.23303					0.105135	1.61558	0.0735285	1.55841	0.438049	5.01546	0.707265	0.117965	1.39921	0.00757381	1.19989	9.38794					0.188568
	0.495596	0.211325	5.65506	2.01101	0.239847	12.5547	3.82852	0.636137	24.9353	5.38063	0.807767	1.55065					0.94177	4.67197	0.498837	0.548688	1.33958	0.133971	3.58257	0.231176	0.230981	0.28916	0.281818	2.50118					0.104171	2.10429	0.0482997	1.94323	0.422971	4.06172	0.631341	0.104739	0.970569	0.0205404	1.29518	6.31964					0.148269
	0.639476	0.253331	10.2108	1.6995	0.664055	11.9484	1.58872	0.526455	25.9668	4.04182	0.519663	1.19736					0.660355	4.03579	0.208077	0.718869	0.749566	0.0881519	3.34293	0.181025	0.110183	0.153075	0.199115	2.03185					0.0566181	2.36245	0.0349749	2.87127	0.348818	3.1108	0.343497	0.083668	0.893958	0.0275887	0.969157	5.02576					0.126254
	2.15493	0.332845	8.66164	1.62068	0.587999	14.6741	2.03481	0.531429	25.9264	4.91894	0.599255	0.821804					0.600611	3.26675	0.771589	0.542987	0.565139	0.0989102	4.14477	0.0930257	0.123769	0.900859	0.201	1.33294					0.0297592	2.60036	0.125278	2.63735	0.27127	3.13818	0.572791	0.158121	0.199773	0.0474776	1.18187	6.24432					0.109216
	0.627557	0.702175	7.55874	1.60631	0.446194	16.3614	2.36549	0.492988	25.308	6.39161	0.503345	0.230736					0.573623	3.1279	1.83306	0.64064	0.794813	0.310794	3.88794	0.203764	0.143195	8.12863	0.0449081	1.49515					0.0432844	2.84472	0.093154	3.50065	0.208779	3.01478	0.412601	0.0810918	0.195779	0.10067	1.26674	4.99848					0.044939
	0.801456	0.916664	9.98206	1.52298	0.0855387	19.7668	1.24553	0.770285	26.0088	6.82296	0.496111	0.449105					0.455286	3.3787	0.985111	0.607835	1.54209	0.0520916	6.80887	0.213139	0.0426897	2.59908	0.0267532	2.17547					0.0634209	2.83032	0.173368	3.10134	0.190289	2.49034	0.587638	0.107318	0.616579	0.0260616	0.840235	4.63988					0.00507689
	1.05252	0.922616	8.32735	0.835151	0.150511	21.9336	1.34182	1.17265	28.1708	6.2287	0.554717	0.449189					0.777533	2.19654	0.724982	0.312251	2.45118	0.564493	6.31318	0.0767417	0.936459	2.46783	0.27396	2.36781					0.218115	2.81619	0.030095	2.23091	0.211572	1.87011	0.612324	0.0514363	0.413008	0.0364181	0.403439	3.4214					0.00158156
	0.564273	0.877274	7.73228	1.34491	0.15845	22.1322	1.54551	2.37776	26.4981	4.03746	0.274618	0.374758					1.16152	1.95983	0.708465	0.430657	3.70181	1.69234	6.83445	0.284119	0.418774	1.66157	0.132696	2.8781					1.17977	2.45961	0.112147	1.67872	0.103335	1.22825	0.786246	0.0734666	0.651915	0.0365604	0.375028	2.59864					0.139705
	1.15162	3.65763	11.4494	1.22103	0.320147	23.0012	1.8902	4.80297	24.5622	1.66314	0.32617	1.39548					1.67785	3.0634	0.437916	0.515003	3.68211	2.89644	5.05937	0.456917	0.357554	1.52551	0.437268	3.31623					0.729856	2.30832	0.0488907	1.40067	0.14133	0.65608	1.30908	0.114718	0.529077	0.0557346	0.2198	2.29119					0.137352
	1.16807	1.35083	8.58405	1.22285	1.12373	22.4961	1.32508	3.41521	19.4781	1.60227	0.525575	0.267431					1.90229	3.35531	0.502984	0.679877	4.54761	3.62784	4.03835	0.669874	0.653602	0.834986	0.61236	2.68051					1.02249	1.67291	0.0413288	0.782457	0.123883	1.81428	1.61808	0.0262968	0.642624	0.0692479	0.152054	1.66258					0.0860063
	0.774945	8.14387	6.95835	1.18493	0.60404	20.9358	2.95541	2.2964	19.4545	1.90025	0.373317	1.30443					1.52738	3.30061	1.31005	0.689146	5.95434	4.95849	3.64802	0.88463	1.76019	0.35859	0.575929	2.43947					1.75124	1.47288	0.0176464	0.704653	0.0618	2.23279	1.7761	0.0159626	0.734599	0.0926766	0.224001	1.23008					0.0597586
	2.03773	5.56141	6.1412	1.43976	0.703127	21.391	5.08716	5.57279	19.2045	1.48381	0.701187	1.0724					0.778152	3.10873	3.37497	0.5042	4.69454	8.20937	2.34227	0.61812	0.812898	0.432708	1.06806	2.44944					1.89585	1.54494	0.104945	0.412411	0.0254677	3.43883	1.73993	0.0896085	0.280884	0.103267	0.387277	0.468566					0.27533
	1.93391	1.26103	4.36051	1.90052	0.458676	18.1111	8.69141	3.82908	17.4415	1.76113	0.661007	1.44976					0.489445	3.68238	2.7446	0.488247	4.01655	9.0037	3.92597	0.533182	0.55957	1.12263	2.20602	1.65202					4.55359	1.29567	0.0224159	0.191893	0.0363576	3.40044	1.8092	0.0559232	0.244614	0.0809239	0.32656	1.09731					0.0701756
	1.19562	3.81724	3.77087	2.01269	1.10536	15.5356	9.5469	6.66337	19.8907	2.18366	0.272532	2.1933					1.26197	1.90505	4.5347	0.396118	1.3549	12.3127	2.42663	0.684056	0.623931	0.22453	4.18544	2.22538					4.4526	0.645762	0.0274624	0.309037	0.0166663	3.58278	2.43712	0.107467	0.296278	0.0357628	0.62216	1.75491					0.0900124
	0.167783	9.27353	2.51486	1.86268	1.41962	13.0687	8.7491	7.65301	19.8799	2.49942	0.831713	2.18403					2.36317	4.16287	4.95506	0.292559	2.17993	13.5877	4.38602	0.685867	0.907645	0.242276	4.67915	2.90318					4.45383	0.170749	0.0183991	0.227042	0.0515669	3.92959	1.83528	0.067056	0.283535	0.082415	0.698286	0.706808					0.024243
	0.456514	8.44895	1.72612	2.13303	0.984802	11.069	6.65387	7.81241	18.5315	2.04796	0.93842	5.87275					2.82975	4.87693	6.38551	0.219577	0.201433	15.9494	4.90464	0.511858	0.943525	0.0466991	4.64933	3.01199					3.898	0.774921	0.0493959	0.238116	0.0190461	3.18201	1.96944	0.0696818	0.143979	0.0430244	0.701088	3.20366					0.0831889
	0.520424	8.49398	0.869751	1.52977	0.875538	11.4846	3.65797	6.13686	19.9874	1.84382	0.794079	6.35998					2.11279	7.8544	5.87369	0.178405	2.70166	17.9043	5.10646	0.497375	0.719451	0.332117	4.09865	3.62179					3.48613	0.951245	0.0140249	0.305213	0.446731	3.214	2.35208	0.149042	0.182741	0.00805928	0.518752	2.50859					0.0852658
	0.741899	3.05	0.642215	1.22115	0.627941	7.90581	2.87996	4.06404	21.1814	2.02886	0.216515	5.26931					1.38018	7.94431	6.36572	0.03584	4.96666	17.7066	5.48637	0.700019	1.61068	0.446944	3.12656	3.90815					3.41704	0.970275	0.10591	0.253449	1.68509	3.81613	1.9415	0.131655	0.250665	0.0606875	0.363159	2.51754					0.0952025
	1.07812	2.89026	0.385896	0.791539	0.745316	6.60257	4.09782	3.46078	14.8361	1.1492	0.211779	4.49871					1.03756	9.79079	8.33395	0.0608139	6.00081	17.6572	4.71799	0.490107	4.50477	0.389768	2.63961	3.47749					2.93814	0.721364	0.0397079	0.306807	1.40747	5.49743	3.26413	0.0755359	0.132507	0.0609328	0.291187	2.30645					0.04732
	2.33082	1.84312	1.82275	0.730324	0.64182	4.87398	4.54213	2.69677	13.3613	1.00006	0.587901	3.8421					0.770058	13.2017	9.77485	0.074996	4.32027	18.1777	6.78547	0.553341	5.94014	0.19467	1.74402	3.63276					2.07163	0.289347	0.148762	0.3474	1.27892	6.42707	3.53609	0.0689053	0.0708899	0.0495113	0.324934	2.32844					0.277963
	2.62303	1.16376	0.192823	1.01179	1.0383	3.86958	6.58856	1.84606	12.5256	0.577986	0.0597751	3.08509					0.706009	11.0023	10.4044	0.0636384	3.46493	19.2983	8.70089	0.522135	5.22263	0.275984	1.54442	5.09581					1.6407	0.189446	0.124875	0.156074	0.845182	10.1288	2.78932	0.0625257	0.164996	0.624098	1.05499	2.37131					0.34834
	3.50922	3.87935	0.523195	2.07282	0.769101	2.18318	8.05432	2.55762	6.43781	0.259668	0.63219	3.30612					0.419974	13.0983	9.73619	0.0399806	3.00695	18.1965	9.5238	0.328994	4.90238	0.111071	1.83379	6.1816					1.45187	0.343077	0.0541835	0.154347	0.442512	13.3482	2.92121	0.0476084	0.127439	0.474223	1.02727	1.45747					0.380287
	1.40288	2.78516	0.581737	3.28196	0.490425	5.72658	6.91174	0.590942	6.63967	0.413778	0.461524	3.43976					0.286555	13.8854	10.1384	0.0567778	2.52807	14.8153	9.08801	0.110858	5.03857	0.145389	0.794143	6.40862					2.17923	0.564462	0.0944412	0.0284742	0.33443	13.3702	2.88101	0.032579	0.0329613	0.0680735	0.394634	1.06623					0.479504
	0.584588	2.48434	1.51499	4.05935	0.704005	3.46436	7.26517	0.267496	4.94288	0.179512	0.31464	3.17752					0.246382	14.3221	9.8013	0.00712197	2.01313	14.0969	9.77044	0.0309469	4.78859	0.0917421	1.03521	9.12307					3.45336	0.253527	0.0353872	0.164673	0.302354	17.2368	2.36777	0.045609	0.112124	0.0363162	0.503588	1.06445					0.2272
	2.19375	2.05845	3.05796	3.65075	0.428763	3.08239	5.07384	0.205099	3.4375	0.851584	0.565483	2.61725					0.315666	13.7538	10.5616	0.0166471	1.15056	9.25209	11.3637	0.348878	4.82214	0.0818369	1.60465	9.5122					4.32029	0.218391	0.036706	0.0713667	0.226835	19.8831	2.04514	0.0904407	0.100131	0.181789	0.44797	0.807739					0.142247
	1.90151	1.9565	3.52004	3.45255	0.706979	4.42693	5.11949	0.527387	2.22724	0.808922	0.315851	2.01127					0.135996	13.0696	10.0091	0.0360038	1.1868	6.63547	11.879	0.0996842	3.2999	0.0911461	2.10527	9.80765					6.33113	0.187793	0.0106343	0.0573797	0.750074	17.4861	1.57682	0.0331596	0.099571	0.0633152	0.374913	0.367724					0.291439
	1.27679	1.71224	5.59726	3.87476	0.754243	0.917601	3.97151	0.318696	2.2701	0.527912	0.662205	2.87054					0.163009	14.2685	8.81724	0.0502028	1.29066	4.65752	10.2198	0.170499	3.08813	0.0791092	2.70693	9.85688					5.46508	0.0399388	0.112001	0.129468	0.553051	16.7173	1.11415	0.0934821	0.0936076	0.131525	0.170155	0.35416					0.128751
	1.96869	0.616082	5.22639	3.46872	0.276782	0.947477	2.74713	1.2246	2.62615	1.1901	0.668702	2.06095					0.217789	13.9624	6.00148	0.0692319	0.550647	4.14674	9.81503	0.0979229	3.09365	0.224376	4.80623	10.4838					5.70003	0.0714023	0.106577	0.184001	0.270631	16.711	0.812993	0.107546	0.0323397	0.0488947	0.0398211	0.215839					0.175941
	3.2041	1.24138	5.06061	4.25672	0.674443	2.49143	1.85785	2.88737	4.00454	3.45119	0.394451	0.480634					0.356842	13.392	5.90189	0.0579233	0.292549	4.19811	9.89191	0.0927987	3.43728	0.0514418	5.06781	10.1299					6.56948	0.18209	0.0255472	0.0718056	0.224159	17.5809	0.552301	0.0313709	0.0342329	0.00615259	0.182225	0.156695					0.0673346
	2.08243	2.30539	6.4306	5.13073	0.941356	0.905978	3.10526	5.59364	1.08598	4.99	0.268471	1.28652					0.23817	11.1527	3.27091	0.193026	0.535438	3.50785	12.6016	0.113283	4.20005	0.387519	6.99979	6.4104					6.72604	0.374601	0.0673065	0.0886205	0.296806	17.3188	0.367631	0.0651803	0.239136	0.0862109	0.54574	0.411748					0.0179142
	2.76811	4.23816	6.89423	3.17978	1.27214	2.02218	8.4512	5.42336	1.74401	6.22174	0.392921	3.23196					0.0909062	10.238	2.56052	0.0732081	0.493837	4.14862	11.0647	0.0738884	6.60188	0.105295	8.42996	4.17532					5.75867	1.85403	0.260411	0.0849163	0.0463987	16.1298	0.183975	0.12114	0.0968222	0.112103	0.872358	0.247888					0.0494212
	2.10926	5.02514	5.02323	1.24217	0.10056	0.526763	5.48981	4.91023	2.13666	6.15876	1.10215	3.19322					0.0530248	7.73074	2.74617	0.084839	2.24269	7.39646	9.57335	0.0539216	6.22614	0.0957633	9.25801	2.52511					6.06147	2.88608	0.0952538	0.0512242	0.0600884	14.4679	0.122043	0.0256744	0.164322	0.12553	0.680118	0.0501738					0.13744
	2.56364	7.4193	4.8095	1.58275	0.276993	0.92121	1.81469	5.4921	3.87099	8.13727	3.73046	4.91964					0.237437	11.0135	2.27772	0.111248	2.60929	7.16706	8.13191	0.0730677	6.81703	0.248059	9.77445	2.96606					4.97622	2.98713	0.0545019	0.101767	0.0841608	13.396	0.156002	0.0543587	0.135173	0.0596197	0.867868	0.067882					0.0279155
	4.78941	5.81324	4.61855	1.44201	0.145623	0.94778	3.92702	4.74205	2.28913	7.06192	1.73533	4.30465					0.105917	10.2116	2.3165	0.0667437	1.50531	8.84071	6.15587	0.0161052	7.91978	0.132223	12.5901	5.25975					4.90415	2.82227	0.0214016	0.0719976	0.069646	13.2451	0.229788	0.056473	0.0600746	0.0510964	0.48141	0.314148					0.0321616
	1.38853	3.86916	4.82853	1.45613	1.31663	0.251273	2.52366	5.69636	2.13338	5.59739	1.66367	4.69856					0.234132	7.26117	1.48351	0.108596	1.26662	7.37781	6.70274	0.111872	6.95076	0.0496711	13.8078	7.00352					3.40506	3.35323	0.0232835	0.0216957	0.0617451	13.4062	0.171639	0.0574602	0.0262335	0.0524479	0.251397	0.193067					0.0537933
	6.08714	4.2397	4.70075	1.10847	0.230486	0.633063	1.30293	3.6203	2.06779	4.19573	1.09384	5.7167					0.521161	9.47326	3.98704	0.0744443	1.26649	7.17204	5.04778	0.0623131	6.34164	0.53449	15.6304	10.8649					2.67707	3.93671	0.143164	0.151215	0.0392831	14.7479	0.228224	0.12111	0.209236	0.0720029	0.248343	0.118079					0.191185
	9.58952	4.47796	4.3709	0.827442	0.683976	0.661972	3.81231	3.0858	3.14987	3.13768	1.06466	6.32549					0.104256	12.8257	1.36252	0.0179965	1.04329	6.36322	2.83242	0.0918007	6.42578	1.79834	17.9475	10.5433					3.09798	3.77825	0.0535114	0.0434218	0.0794198	14.9809	0.26144	0.0360845	0.0665088	0.0131379	0.197068	0.244264					0.128626
	10.4114	6.10554	3.83407	0.87004	0.484669	0.69211	2.00561	2.2071	4.56122	2.23256	1.28481	7.35361					0.138287	12.5522	1.42944	0.0381732	0.704005	6.7537	2.81676	0.0441441	5.97251	1.34554	17.071	12.179					2.99415	3.29815	0.0691359	0.115857	0.0471005	16.2061	0.242079	0.88258	0.164763	0.0298038	0.573801	0.18461					0.0316871
	9.19533	6.42581	3.26122	0.644296	1.80896	3.41644	1.46227	1.90733	6.39062	1.46695	0.771973	5.49848					0.0328957	12.6916	3.0942	0.0760403	0.800529	5.78835	2.77158	0.0306445	4.59602	1.07621	18.9465	14.3953					1.78286	2.50076	0.0327623	0.0460439	0.0187071	16.2073	0.196831	0.230301	0.121631	0.0417561	0.687178	0.219596					0.0919585
	7.608	7.17782	2.93686	0.209151	1.27221	2.70956	1.01693	1.48474	10.1243	1.2196	0.895576	3.46948					0.385703	10.6287	0.806414	0.0514381	0.632053	4.36065	3.93932	0.0890317	3.72393	0.509272	19.2944	13.2451					2.77881	2.25651	0.384132	0.0948336	0.0341357	13.9642	0.139762	0.323767	0.221011	0.0237893	0.521813	0.191994					0.0390038
	6.75176	9.84031	3.58148	0.90088	0.665083	4.37326	1.03099	1.0544	8.12322	1.46805	0.508576	2.86066					0.34941	10.4811	0.957473	0.0579973	0.120112	3.23172	2.74164	0.218778	4.86697	0.2174	18.9429	13.369					7.22622	1.42238	0.167787	0.0405424	0.0211687	12.9137	0.0252993	0.252058	0.0733017	0.0310568	0.363449	0.1015					0.0563854
	4.35943	10.9125	2.80073	0.444592	0.170621	4.02355	0.882063	0.698998	10.4903	1.21418	0.626406	1.73029					0.460356	9.67564	0.84393	0.0721231	0.250781	2.29487	2.78633	0.134671	3.13766	0.784393	20.0185	14.2951					3.87537	0.482379	0.120632	0.172403	0.0385434	11.1828	0.13298	0.233816	0.145934	0.165941	0.304452	0.277087					0.0386659
	2.52487	15.1201	2.34039	0.788317	1.07166	4.682	0.712683	0.637649	7.58715	0.911122	0.441963	0.259788					0.292433	9.02076	0.3362	0.0946026	0.156102	2.16769	3.22392	0.0723447	3.04477	0.885003	15.1824	12.828					5.50751	0.294846	0.0219237	0.0263949	0.0462329	11.137	0.0511139	0.621273	0.156694	0.0475009	0.240934	0.0507665					0.0671688
	1.06012	17.7201	2.10171	0.394088	0.809524	5.11644	2.70162	0.715869	4.5742	1.63472	0.355999	0.536132					0.166394	7.26715	0.689984	0.0765047	0.201964	1.7636	2.1427	0.0212488	1.96692	0.996006	11.5913	9.99149					5.35551	2.52929	0.0571444	0.029828	0.0329767	9.11842	0.0849812	0.400484	0.161801	0.0530843	0.684127	0.0561869					0.0589938
	0.610025	20.8505	1.75908	0.364885	0.502132	5.86603	2.64104	0.615203	1.57948	1.84881	1.74856	0.204014					0.0793143	9.54158	0.774838	0.0729567	0.286362	1.48749	1.89715	0.0315261	1.2916	2.19904	8.34982	9.79602					5.30564	3.26651	0.0903837	0.0590484	0.0158687	7.72415	0.0526215	0.53421	0.0333884	0.0520134	1.24059	0.13276					0.0732774
	1.11056	23.7874	1.23863	0.226243	1.57423	6.79169	4.72091	0.993096	3.81028	4.78452	1.64681	0.270861					0.160968	10.1086	1.2255	0.0429655	0.0392135	1.45991	2.46975	0.167776	1.79271	2.59871	5.90078	9.21463					6.20496	3.36592	0.295231	0.063561	0.112093	6.93408	0.118451	0.423106	0.175973	0.135092	0.483848	0.0687748					0.0359717
	1.89028	22.4897	0.696188	0.341731	1.05416	10.1101	5.99489	0.708221	1.62279	2.17467	4.6455	0.587087					0.149305	11.3698	2.43883	0.0262566	0.165438	0.716389	6.44862	0.0263247	0.887446	2.45401	3.4847	8.17142					7.82729	3.24846	0.667511	0.0852647	0.38298	6.07002	0.0438185	0.350466	0.0629506	0.0538748	0.651868	0.149951					0.014916
	2.23628	28.1426	1.68921	0.131825	0.405096	11.3989	6.87361	0.481651	1.66005	2.09064	3.26947	0.557315					0.554186	7.58182	1.18536	0.506924	1.01345	0.768652	4.3074	0.278132	0.342748	3.68006	2.36229	6.806					10.6574	3.09725	0.559593	0.142905	0.364675	6.1519	0.130187	0.341431	0.194075	0.00766407	0.335164	0.128676					0.113123
	1.96403	28.4908	2.40744	0.105436	0.793689	15.4363	9.84879	0.629367	1.73983	1.49585	2.87012	0.496664					0.347832	6.67516	0.777342	0.343543	1.47645	1.45176	3.38903	2.62662	1.69657	3.6495	1.5277	4.71554					11.6548	3.55956	0.79239	0.0739794	1.07911	5.24674	0.132544	0.608283	0.147685	0.034977	0.510563	0.27585					0.0899016
	2.1809	25.196	2.94467	0.171002	0.13435	15.5269	8.58518	0.733026	1.41434	2.41673	3.11993	1.01815					0.436959	6.09542	0.521101	0.705202	0.643873	1.75749	2.81874	3.57643	2.1807	3.13155	0.433031	4.40112					12.5044	3.52734	1.16132	0.126718	0.56951	5.12013	0.0978629	0.374175	0.0932679	0.060095	1.45087	0.183944					0.0761758
	1.85348	24.033	1.83304	0.15985	1.25349	17.6755	10.6367	0.616694	0.719196	2.4136	2.96117	0.329308					0.259835	4.3005	1.15247	0.365932	0.702737	1.732	2.57921	4.03371	2.6227	3.43509	0.916833	3.14451					13.2814	2.05428	0.584381	0.0947703	0.603292	2.51121	0.335251	0.296991	0.103619	0.0403294	0.383737	0.527441					0.0449709
	1.87032	21.2413	1.14995	0.139345	1.46179	17.3946	11.6602	0.595222	2.33258	1.91475	3.01233	0.224495					0.121319	3.4297	0.774236	0.225828	0.269702	1.99772	1.64977	3.27511	1.78787	5.26029	0.40774	3.56341					12.7173	1.41693	0.981571	0.0549411	0.372587	1.4226	0.197013	0.263861	0.0138725	0.0206989	0.272464	0.082397					0.0592444
	1.7691	21.3189	1.11343	0.0132576	1.21387	23.4094	11.2449	0.614822	4.11284	1.94416	3.17395	0.746869					0.051167	4.6672	0.418098	0.266998	0.204221	1.2957	2.20655	1.98918	1.85323	4.24862	2.02899	4.55221					11.6732	0.848093	0.941774	0.0394962	0.548882	0.849318	0.0999175	0.767755	0.140004	0.0773712	0.976059	1.6789					0.108723
	0.954726	15.9304	1.81925	0.259702	0.982276	17.6714	12.3218	0.41477	2.13921	1.90183	4.01261	1.27179					0.0685528	3.52884	0.404386	0.701926	0.232603	1.08566	3.64397	0.45785	1.37969	6.06142	3.85089	2.12028					9.97932	0.789579	0.910344	0.0145746	0.240235	0.462067	0.0898155	1.46685	0.0846441	0.129546	0.0472104	1.16322					0.0323797
	0.627453	12.1466	2.91143	0.0545391	0.532315	16.8367	12.0646	0.655842	1.93099	1.57112	4.21982	1.38461					0.124857	2.37475	0.119983	0.757045	0.0386382	1.21417	1.51581	0.36181	1.06716	6.5834	2.0776	3.27161					7.68833	0.53158	1.00366	0.0474623	0.123248	0.40594	0.222242	1.30196	0.111243	0.0348876	0.415295	1.02301					0.0302329
	0.397819	9.77825	2.41867	0.789406	0.774483	19.4931	14.7836	1.49997	2.59962	1.50778	5.57688	2.3294					0.125131	3.71135	0.419904	0.867291	0.0540922	2.31536	1.48981	0.728449	0.773556	6.50472	1.19551	1.73991					6.18979	0.442308	0.979896	0.0538757	0.146024	0.767377	0.0286401	0.837759	0.034944	0.0685211	0.435514	0.232937					0.0681559
	0.160291	7.74854	2.95071	1.3285	0.694561	19.3102	9.80951	3.31137	2.70873	1.18664	6.81749	2.99907					0.0860504	1.60732	0.461067	1.33066	0.0531815	2.15879	1.08099	0.833148	0.556083	6.07215	1.33523	1.03108					5.2998	0.316504	0.956316	0.0652807	0.0477591	0.310274	0.118035	0.756181	0.0658063	0.006906	0.687956	0.473208					0.0172526
	0.353586	6.31488	3.86792	1.14761	0.405353	19.2089	7.11346	4.69519	2.1837	1.30428	7.0405	2.7799					0.0349216	1.65962	0.442158	0.778885	0.0584975	1.08053	0.785093	0.580968	0.457308	5.73856	2.68353	0.597169					3.40728	0.157464	0.945022	0.0341275	0.169293	0.419681	0.052782	0.924087	0.0519342	0.0343694	0.749351	0.654129					0.0209988
	0.91503	3.42797	4.85385	0.701075	1.20931	19.0909	3.13349	6.41871	2.24935	1.56807	7.09746	2.35481					0.0645326	2.11137	0.370015	0.954283	0.263639	1.49035	2.46036	0.567998	0.345795	5.36762	3.00718	0.846676					3.12634	0.223315	0.491948	0.0720605	0.162545	0.26123	0.1379	1.18721	0.0951201	0.101267	0.764272	1.79476					0.0303439
	1.52089	3.18003	5.6182	0.523156	0.491522	18.9726	1.62329	9.30461	2.12785	2.47658	7.00623	0.832177					0.576877	3.16571	0.297268	2.32924	0.274574	1.67339	5.67339	1.08551	0.286228	6.04793	3.41692	3.86512					4.47527	0.368955	0.916259	0.0573054	0.145098	0.25048	0.0984301	1.03598	0.0752313	0.198491	0.226541	2.1842					0.0614975
	3.26066	2.07591	6.42085	0.435107	0.48838	17.5731	1.92132	11.6682	2.96557	4.8187	6.40136	0.922774					0.258605	5.1236	1.25871	1.0183	0.371509	2.23232	4.27546	4.73965	0.208435	6.11773	3.26775	11.1928					5.23484	1.21101	0.886939	0.0899144	0.242438	0.833788	0.0557164	1.19703	0.134691	1.03647	0.16372	2.19143					0.135998
	2.2169	2.19737	4.65767	0.161917	0.943938	18.4039	5.25615	12.9413	1.49777	7.61512	5.64956	1.0654					0.152319	5.61969	4.81399	2.27367	0.266379	2.54021	3.27967	2.59082	0.226394	6.45863	2.24594	2.15161					5.46933	1.26876	0.736424	0.0900492	0.0429548	1.07438	0.0243734	1.27778	0.0600182	0.484839	0.250412	2.63598					0.105964
	2.76654	3.05235	3.69662	0.314286	0.324414	18.3861	5.28052	14.1277	2.70808	9.86405	4.33092	1.85578					0.269335	6.38736	8.09452	1.41492	0.213127	4.45077	1.46045	2.00716	0.20562	6.72885	2.05806	4.4464					7.29826	1.85116	0.607004	0.0290714	0.116065	1.09428	0.0311095	1.0344	0.190248	1.18555	0.227494	3.26432					0.127554
	2.89442	3.42634	2.63371	0.526036	1.35208	17.0752	6.0538	14.0768	2.8581	10.3993	4.31576	1.45025					0.242869	6.42027	13.4023	1.39006	0.0523223	7.04641	1.90352	4.23445	0.151316	4.22809	1.76529	5.08433					14.5852	2.46504	0.547116	0.020833	0.0740765	1.07542	0.014218	0.854169	0.0604852	0.727038	0.303398	2.5679					0.13649
	2.6861	3.30268	1.90968	0.678387	1.24201	15.7925	5.51923	15.1879	2.84335	10.4947	3.06739	2.32236					0.487471	8.31819	15.6921	1.22533	0.174819	5.77895	1.57846	6.68548	0.167811	3.20213	1.91406	3.1859					11.6686	2.76089	0.478167	0.063468	0.0283331	1.28525	0.130172	0.575811	0.0719702	0.791198	0.57274	1.98914					0.0184007
	2.96033	4.6656	1.41927	0.851705	0.581815	14.3982	4.8895	15.2265	2.29215	12.775	2.44436	4.15495					1.33975	13.9932	14.3098	2.70917	0.118766	5.14124	1.45236	6.6589	0.193507	2.11999	1.32421	2.48805					15.9506	3.93907	0.729901	0.117905	0.159003	1.95195	0.0728029	0.280569	0.268643	0.650533	0.525413	2.41534					0.0789704
	2.60026	4.46801	1.48103	0.551481	0.74518	12.1167	4.71674	14.3723	2.00542	15.6393	1.95723	3.96057					1.56056	12.8648	11.988	1.24057	0.099837	3.12566	3.228	9.70957	0.155412	0.834064	1.23624	3.71499					17.8404	4.95592	1.19615	0.0438984	0.0422332	2.29724	0.0674856	0.334644	0.164476	1.03236	0.221386	7.84233					0.00716457
	3.61263	4.31986	5.78566	0.430675	1.07124	10.1907	6.07538	14.4135	2.5576	14.7526	0.0809266	4.66535					1.21909	11.559	10.3936	0.483524	0.205279	3.2909	1.75363	8.47682	0.152047	0.246168	1.0378	5.3938					15.8665	7.09129	1.30051	0.0720411	0.0778307	2.28446	0.0382798	0.159877	0.189709	0.700124	0.0387751	9.28786					0.145233
	1.0832	5.28251	7.66102	0.458378	0.276679	7.06878	3.26691	14.6007	3.02002	17.2279	1.18818	3.49408					0.992799	16.3596	9.17353	0.627789	0.456638	1.3056	2.99903	9.62972	0.146925	0.981573	0.810746	5.53205					13.4573	7.78095	1.25586	0.0253641	0.0590998	3.46212	0.0908378	0.193911	0.0563913	0.537791	0.102358	8.57672					0.0216895
	1.42054	7.74183	8.46499	0.271406	0.643162	3.50059	2.88881	9.34216	3.44963	15.1494	2.31563	3.35241					1.02773	13.7913	7.37072	2.01351	0.37258	3.4454	7.55417	9.44933	0.0453495	2.16611	1.49384	7.45433					14.1843	8.23337	1.54912	0.0970279	0.0458911	3.05258	0.053519	0.180139	0.14893	0.654845	0.0743491	8.62326					0.0502542
	0.676226	6.11767	11.6632	0.183397	1.02176	3.02295	3.1608	6.66107	3.92778	13.4817	3.77843	4.69109					0.994941	9.96501	6.53771	2.64536	0.856863	2.25282	4.89247	9.59628	0.0838134	2.22002	3.31543	7.1869					11.3952	8.89163	1.22918	0.153185	0.0161528	5.02498	0.0671445	0.509023	0.0416638	0.854625	0.105607	6.3989					0.0505073
	3.11231	5.7798	10.7529	0.101649	0.360158	1.73508	4.3045	5.84371	2.10592	12.4949	7.68452	6.39754					1.04354	8.43939	7.2333	4.17102	0.796426	1.66056	5.3421	10.3001	0.0695921	2.77948	3.05433	7.90601					7.0614	9.4812	0.972003	0.0192635	0.0513271	4.61906	0.092574	0.767509	0.128339	0.581913	0.0751482	4.09528					0.0720992
	1.96725	5.48477	10.3988	0.0456673	1.26958	1.03593	5.97468	4.3478	2.05725	11.9524	9.58127	4.72341					1.02599	6.34941	7.80795	3.6919	0.523808	4.11594	5.86299	9.44912	0.0870492	3.19749	4.32581	7.84126					3.35194	10.4966	0.791329	0.13084	0.0140366	3.86553	0.0804437	1.20893	0.10373	0.838584	0.116367	2.84805					0.162496
	0.880364	11.5827	9.15709	0.0793785	1.71022	0.268771	6.07299	3.2959	2.63265	11.5498	11.961	6.81539					1.08953	4.76433	5.61201	3.13777	0.783516	2.26918	3.72905	8.25848	0.0310848	3.09099	6.37893	6.03297					3.67659	10.7513	0.430674	0.0874407	0.0098415	3.99518	0.0437723	0.785683	0.029084	0.549525	0.128097	1.77025					0.146695
	0.568595	4.64437	7.41087	0.135674	0.840284	0.942812	7.3442	1.49389	1.31523	11.6869	23.5499	7.40858					1.29261	3.74294	5.77832	3.3105	0.763338	1.06796	2.94763	15.0891	0.0351978	3.0293	5.99361	5.02627					2.36285	12.8166	0.207255	0.10165	0.0223832	4.40696	0.0561814	0.99138	0.0383995	0.897137	0.177286	1.27753					0.102208
	0.410545	3.54727	7.31855	0.0567247	0.428945	1.0238	9.42744	0.707691	2.16118	10.7732	17.296	6.78803					1.51254	2.18562	6.93978	3.78946	0.543568	2.24381	3.03249	9.2864	0.0190322	3.77654	7.15524	4.55063					1.78915	14.3464	0.502063	0.0806555	0.0399556	3.14679	0.0807256	0.958833	0.234203	1.00434	0.0906876	0.870063					0.154074
	0.753116	3.15026	5.46775	0.103088	0.525804	2.08863	8.6679	0.239058	1.26327	9.77483	16.2908	5.90996					2.06399	1.71572	9.24984	4.82799	0.368587	1.0375	3.1685	10.6611	0.066933	4.12437	7.45126	3.86048					1.12227	13.3652	0.89761	0.248628	0.148929	1.6184	0.109974	0.802684	0.108566	1.5074	0.0875629	1.21696					0.0172879
	1.50153	2.5367	4.51888	0.304043	0.737002	5.26017	7.89284	0.465035	1.36918	7.89837	15.1015	4.82086					1.88195	2.28354	15.4439	3.72604	1.58665	0.477825	3.93323	12.2801	0.0579019	2.69265	8.7776	2.44171					1.88338	12.7762	1.19673	0.825749	0.133978	6.14225	0.113076	0.45092	0.0284843	1.14138	0.14283	1.02419					0.0546613
	1.13197	1.92863	4.30798	1.22424	1.17553	2.01465	6.35755	0.765025	1.12515	5.37909	13.8483	2.37425					1.53933	2.76505	14.2281	3.97593	4.50943	0.536596	3.24609	9.66592	0.0219495	2.29385	5.63318	0.887603					1.05716	12.3161	1.30023	1.62307	0.0431048	2.77266	0.0792808	0.490564	0.193995	0.4607	0.0746938	0.807807					0.100887
	2.55597	2.73382	4.394	1.54187	2.63648	1.54119	5.0202	0.643569	0.970931	3.89148	10.2033	1.03515					2.62085	3.6961	18.4166	3.22883	4.97863	0.376587	2.7532	9.51346	0.0296223	2.13349	6.85902	1.78381					1.12687	13.6536	1.02204	2.2988	0.112204	1.9883	0.157229	0.418332	0.0915587	1.02699	0.0389187	1.56673					0.0345691
	3.03328	2.4663	6.31446	1.20232	2.31827	0.728401	4.45891	0.3254	1.00498	2.47197	7.14866	5.98504					1.35843	5.75903	17.6664	2.70818	3.66581	0.380546	2.32236	8.58899	0.0180668	2.16794	4.32093	1.37773					1.44119	18.3312	1.53839	1.80027	0.0285512	1.74211	0.101113	0.41616	0.0684952	2.24144	0.595351	4.83389					0.0211604
	3.94337	2.00904	7.87713	0.947971	1.27622	1.0745	3.68408	0.124497	0.596072	1.46708	4.91634	3.49858					0.524285	7.02394	18.529	2.3921	3.58285	0.303549	3.33964	8.7565	0.0073955	2.869	3.3334	2.65055					0.677746	22.2273	1.44778	1.87518	0.080089	0.999585	0.122111	0.426681	0.100259	1.29296	1.03875	6.1532					0.0264576
	6.22123	1.52253	11.7875	0.774566	0.195109	1.49364	2.80851	0.946026	0.723768	0.406514	4.31194	0.732702					0.726287	4.00831	14.332	2.36744	3.67241	1.17806	3.19507	7.90548	0.117052	3.5955	3.14785	1.70768					0.0699165	23.7929	0.69511	1.70813	0.0514764	0.906045	0.0694889	0.405386	0.0144323	1.05442	1.09987	10.1717					0.0807987
	7.4621	0.982725	10.1721	0.518612	0.871629	0.375348	2.84316	1.33661	0.218214	0.41283	2.80508	0.79053					0.937431	4.59998	16.2669	2.03199	3.29498	0.534747	3.72372	3.7197	0.0927327	3.15557	1.12242	1.48142					3.07101	22.877	1.18563	1.2518	0.0409064	0.246714	0.0867251	0.535595	0.112328	1.16129	0.629045	9.73653					0.139985
	7.73635	1.55942	9.84273	0.302766	0.497377	0.585812	1.63052	1.94335	0.276867	0.927611	1.29991	1.41129					1.17655	3.27744	17.4171	1.02042	2.60934	0.245557	4.53397	1.84914	0.0406916	4.34113	1.82967	1.68783					5.57821	22.2278	1.05141	1.23205	0.0696125	4.1689	0.0536187	0.194104	0.134314	0.784091	0.508394	11.979					0.0663222
	8.83513	0.857156	10.3215	0.162187	1.48904	0.240501	2.31654	3.0786	0.516033	0.907014	0.910996	0.706896					0.457116	2.66673	16.3527	1.29604	2.78308	1.03467	4.66589	1.61741	0.0717081	6.00202	0.619202	2.02678					6.42445	17.1579	0.878706	1.14005	0.0191174	1.6039	0.0449185	0.265938	0.276827	0.724454	0.748064	12.025					0.053467
	7.87824	0.754351	9.86058	0.566647	2.76095	0.82247	0.491941	3.22378	0.258463	0.849371	1.00269	0.19065					0.482261	2.80742	17.6342	0.482961	4.44632	0.255565	3.25432	0.813335	0.0149727	7.2803	0.214845	2.26054					6.25069	14.9668	1.25123	0.924914	0.016406	1.22443	0.0493089	0.856096	0.0617298	0.347295	0.53326	10.2236					0.0341928
	8.14654	1.32899	9.77591	1.36605	1.73848	5.16311	0.343389	5.53212	0.523053	1.16999	1.06931	1.81232					0.409115	2.47544	16.7102	0.406263	4.76538	1.6055	1.55057	0.811674	0.0568262	5.20598	0.749368	2.97663					6.95699	13.3417	1.1613	0.610121	0.0354844	1.47457	0.0385775	0.676576	0.112304	0.305349	0.459158	8.63792					0.00385841
	9.54377	0.421492	8.89073	1.3349	1.52891	1.40875	0.967486	5.35823	1.18614	1.17082	1.05517	0.993162					1.34172	2.03565	15.902	0.154318	6.08498	0.336108	1.98125	0.31092	0.0227737	4.26748	1.59165	4.38119					7.03524	12.5857	1.27905	0.469362	0.0469356	1.20837	0.0968058	0.783997	0.0934887	0.307215	0.546137	6.51604					0.0735477
	8.28507	0.700609	5.96088	2.69089	0.994928	3.0521	3.08582	5.8283	0.300322	3.29201	0.956177	0.689072					0.621122	4.37836	16.4408	0.245743	8.38045	0.483477	1.65365	0.453183	0.022333	3.8986	2.30593	5.32866					8.41276	10.5634	1.73574	0.242015	0.0277774	0.896785	0.0290505	0.823523	0.156287	0.205356	0.508874	7.1186					0.0242481
	8.66071	0.317299	4.37094	2.13049	0.726963	3.28356	3.58565	5.34025	1.17054	3.26375	1.55248	0.696226					0.944589	2.90091	14.917	0.390756	10.4433	0.520776	1.34917	0.98192	0.453807	0.916555	2.59468	5.45899					7.99314	9.18168	2.05582	0.345915	0.0312687	0.734976	0.0374855	0.545174	0.0385283	0.392178	0.622132	5.55046					0.041212
	9.93235	0.584147	3.5553	1.84146	0.448939	4.1915	4.80037	4.15007	0.152978	4.33418	1.92269	1.27444					0.443725	2.49883	13.7992	0.399012	10.2428	0.910015	0.481163	2.81827	0.729878	2.96655	2.34166	8.47609					9.34446	6.10588	2.42685	0.0506152	0.012853	0.960604	0.106052	0.568539	0.0517651	0.198696	0.37791	6.98034					0.0137723
	8.2792	0.329594	2.97469	1.17983	1.12314	4.48375	5.40773	3.52868	0.576189	2.69257	0.788547	0.498838					1.99032	1.91585	12.4772	0.37496	8.46106	1.31117	1.53616	2.86602	4.67304	1.7741	3.02655	8.42672					7.77947	4.36732	2.72393	0.0473852	0.00373666	1.38476	0.0592307	0.488297	0.106495	0.254099	0.631809	7.43099					0.0125902
	7.08818	0.462215	2.49515	1.75416	2.1449	4.2334	8.29589	2.67112	0.149408	2.58174	0.478292	0.511031					1.10288	1.50509	13.0947	0.334843	7.03404	0.483431	1.75506	3.25057	4.14788	1.24979	3.3177	6.31626					7.60299	2.90004	2.79926	0.0336086	0.0282027	2.5528	0.083734	0.452464	0.00621508	0.333399	0.852192	8.69313					0.0145756
	5.44246	1.07635	2.68832	2.25452	3.12874	4.93232	8.62169	1.64625	1.16703	2.01659	0.500492	0.951019					2.07986	1.07802	12.0464	0.264774	7.74262	0.178226	1.91259	4.7941	8.26758	0.648655	2.68534	5.76217					8.89079	1.78962	3.10877	0.0703794	0.0343266	2.9402	0.0213312	0.855973	0.0866194	0.145893	0.762051	9.61813					0.0466754
	3.75964	1.3666	1.84272	2.9739	2.90767	5.87438	7.76059	0.611184	0.52541	0.624412	0.596006	0.474383					3.15742	1.4289	10.454	0.136792	8.18223	0.271451	2.69678	4.89397	6.09903	1.43597	1.67981	5.56968					7.21783	1.22086	3.36447	0.0242939	0.0106583	3.56816	0.0790511	1.3925	0.0368505	0.107033	0.902866	11.3171					0.0855493
	2.74786	0.99006	1.27164	2.06075	2.05274	7.76843	7.39911	0.166218	0.96161	0.546046	1.3924	1.79539					2.56139	0.887277	12.0659	0.237551	6.27068	0.331798	4.59224	5.5837	4.94336	3.76452	1.01117	3.31468					6.71099	0.822002	2.95567	0.0770865	0.0353988	4.05294	0.115552	2.04522	0.230012	1.1341	0.678816	11.1634					0.185145
	2.316	0.658448	0.956854	1.9671	1.69361	8.6337	5.76104	0.371635	0.863834	0.113658	1.42178	0.947502					2.52507	0.980988	11.0919	0.187652	6.53219	1.78314	0.721714	4.80243	6.77796	2.2746	2.14884	1.02191					7.76073	1.88475	3.82552	0.0200169	0.029226	4.70743	0.0370083	1.59988	0.088915	1.29699	0.223874	12.9997					0.0521307
	2.53527	0.464625	0.89499	1.99409	2.16138	10.7986	4.77955	0.56665	0.533344	0.292513	0.26473	0.638071					2.2718	0.432977	10.2663	0.0929607	7.36735	1.88783	1.07555	3.51641	5.06835	3.30903	2.08385	0.360923					5.94467	0.862635	3.55131	0.108387	0.0193019	6.60713	0.155411	1.57605	0.0746361	1.15695	0.525996	13.5633					0.0910918
	1.73531	0.843086	0.649369	1.07429	1.95939	14.3479	3.28057	2.91823	0.420489	0.205821	0.469224	0.299333					2.19509	1.0714	10.6002	0.0115507	8.50222	5.75298	2.6431	2.19192	4.54447	1.70561	2.00433	0.995631					5.68004	0.980614	2.94774	0.0628771	0.0355038	3.96551	0.0250775	1.63908	0.280403	0.982108	0.243426	15.2943					0.0299227
	1.40065	1.18985	0.698381	2.3145	1.1678	14.3615	1.05302	2.4144	0.893192	0.808677	0.770149	0.438463					2.15606	1.78872	9.46704	0.0599879	10.7399	7.92971	1.42395	1.8027	4.10459	1.1897	1.4407	1.23113					5.93312	1.37167	4.32607	0.0835667	0.0312918	3.87531	0.153662	1.54577	0.2415	0.950404	0.612211	15.0586					0.0510103
	0.502394	0.912431	0.903081	1.91455	0.607924	15.0831	0.278341	4.19907	1.33197	0.509969	0.919391	1.76215					2.38718	1.75687	7.31798	0.0580049	13.7572	6.67995	1.3983	1.68646	3.40022	0.889248	1.34964	1.19706					5.54366	1.07781	2.16753	0.201527	0.0731438	5.36554	0.129548	1.81399	0.373612	1.4491	0.297112	14.4759					0.0290057
	2.36195	1.76277	1.11276	5.10226	2.39666	15.7184	0.754422	2.50708	1.66276	1.56365	0.964194	1.23025					2.40213	1.82294	5.21535	0.0377186	12.5137	7.03139	1.01058	1.38519	4.768	0.761007	3.00643	1.66755					4.04517	1.63413	0.942956	0.0135607	0.0135122	3.66678	0.0679666	1.59889	0.0756219	0.993451	0.298562	12.0303					0.00994447
	6.80105	3.33221	0.797639	2.08764	3.28576	14.4686	0.777303	1.56507	0.777628	2.94911	1.21645	0.633766					2.24999	1.35206	4.04368	0.0809053	10.3576	7.55474	0.809727	1.51662	5.32325	1.01525	4.69374	1.31599					2.3401	1.14181	3.63234	0.145157	0.0274016	3.19923	0.120167	1.30853	0.10151	1.22965	0.480951	12.1192					0.12237
	6.9582	11.4172	1.41126	0.655003	3.97975	13.1014	1.13496	2.28104	0.147526	5.78895	0.639724	0.210425					2.64892	1.2818	3.0868	0.0221312	11.333	7.13176	0.760523	2.26358	3.53726	0.90358	5.38803	1.39496					1.58681	1.47494	5.55643	0.0627413	0.0090205	3.0251	0.0492308	1.72134	0.137538	0.64971	1.73332	11.7227					0.104682
	9.95009	11.5098	1.96189	1.45126	3.66114	14.4769	1.95863	1.45548	0.36277	7.79085	0.172562	0.291333					1.31858	0.792149	1.23597	0.0141273	9.69181	6.78577	0.980783	2.18762	2.45556	0.968702	5.00006	1.70958					1.54294	0.970383	6.99191	0.0720593	0.0194191	2.36535	0.126045	2.62098	0.135663	0.939404	2.04063	9.38651					0.0112578
	11.0396	11.9368	1.73601	1.98254	2.9331	13.8452	3.59141	1.06179	0.6996	13.5865	1.21109	0.642981					1.42675	0.171913	0.579165	0.0778596	7.33648	6.15189	0.233941	2.80618	1.59816	1.49259	4.63275	3.13028					1.14312	0.962792	7.85905	0.0991327	0.0149911	2.03904	0.106481	2.87363	0.0260438	0.660939	1.6144	11.602					0.0848694
	13.8926	10.8009	1.82363	3.26808	2.07279	12.7145	6.45821	0.807542	0.316365	17.5902	1.50551	0.0922762					0.916476	1.6196	0.441839	0.0618646	4.9058	6.90751	1.16235	2.87893	0.931806	1.89614	4.11097	2.22469					0.518724	0.644239	7.37713	0.125543	0.0727748	1.2803	0.0908956	3.50399	0.10661	0.599816	1.49479	13.424					0.131888
	14.4323	7.40391	2.87844	3.51496	1.41733	14.6768	7.80203	1.4306	0.322584	19.0792	0.946172	0.166846					0.71861	6.15866	1.06555	0.0613125	1.50474	5.46201	0.117127	3.33706	1.02507	2.08358	4.82482	1.6537					0.286227	1.4298	4.90108	0.00990681	0.0267878	1.26558	0.132527	3.42494	0.3049	0.254645	1.05665	10.7176					0.127354
	14.5519	5.59251	2.35608	4.74277	0.898091	16.6193	13.3291	1.10703	1.3613	20.6284	0.845464	0.402491					0.30713	3.42279	1.72132	0.034913	0.972229	4.18548	1.22764	4.45863	0.625166	2.02896	5.79286	1.52852					0.453771	1.02226	5.07121	0.130279	0.0173898	0.983606	0.0495878	2.61845	0.294592	0.169727	1.33188	9.20423					0.118917
	16.1302	3.80514	3.76194	8.46273	0.0756383	14.4417	12.3795	0.207112	1.47212	23.5592	0.470618	0.177541					0.296834	2.48312	1.62449	0.0551462	3.48971	1.80655	0.296626	5.1912	1.47837	1.57595	5.74433	1.06221					1.15997	0.576101	6.04543	0.0669271	0.0090909	1.38163	0.0420385	2.56197	0.910182	0.242454	1.30756	8.11817					0.0127674
	16.4847	2.68896	5.02238	8.58745	1.42024	13.9123	14.4908	1.32127	5.8766	23.9941	0.876143	0.192816					0.222558	2.14531	1.24028	0.0192124	3.87352	1.46539	0.242076	6.00568	2.68394	1.55684	4.78384	0.671286					1.4012	0.56391	4.4423	0.0486964	0.0423448	1.75337	0.0389785	1.89416	0.621046	0.0446995	0.265976	4.11047					0.104674
	21.9352	2.02232	5.69467	8.46839	1.95259	15.5883	14.3214	0.676536	7.03766	22.4273	0.816251	0.587914					0.127051	2.0813	0.980346	0.0620011	4.02135	1.40881	1.18266	5.91515	3.98566	1.21267	4.88737	0.272009					1.28765	0.361448	2.71053	0.0810555	0.0518123	1.15491	0.0373661	1.76487	1.11207	0.044687	1.42591	3.68062					0.0410655
	11.7829	1.12241	3.8196	9.00637	2.62794	15.0504	17.3813	0.767865	5.3569	25.4889	0.807182	0.261606					0.386525	2.01157	1.12151	0.0868135	3.95965	1.45537	1.05488	3.94657	2.98437	1.09567	4.02291	0.42016					1.19614	0.417914	1.45197	0.104475	0.0877236	1.28214	0.00660144	1.98405	2.29859	0.254785	1.06643	2.39344					0.0123946
	8.69476	1.1708	6.78381	10.8393	2.18557	13.3325	15.2491	3.90609	6.56115	26.8707	2.46433	0.508897					0.16587	1.1719	0.71081	0.0981579	3.69822	2.10884	1.61656	2.36498	3.23832	0.798141	3.91346	0.0573061					0.720426	0.478334	1.28543	0.108557	0.0585193	1.03526	0.0856187	2.50132	3.42915	0.192776	0.893905	2.53239					0.0852717
	8.73793	1.36924	8.59921	14.5361	1.32066	13.3656	14.7252	2.24673	6.41843	26.3388	3.81289	0.640671					0.260512	0.881912	0.632139	0.148701	3.29685	1.93497	0.557536	1.87454	6.08009	0.535176	3.89122	0.156166					1.64178	0.168307	0.455741	0.0398677	0.0793376	1.15643	0.0462277	2.37122	2.91071	0.214591	0.495586	2.88347					0.0311286
	4.20337	1.61572	8.08434	14.0993	2.57614	10.0941	14.6962	1.5616	7.48793	25.105	6.29619	0.226443					0.193455	1.5048	0.362941	0.0582918	2.43999	2.01829	0.486706	1.13052	4.64016	0.163417	4.42842	0.265664					1.92456	0.169078	1.02019	0.0343285	0.0255695	2.81918	0.0827137	3.09307	2.88085	0.0468745	0.955346	3.4509					0.0375845
	8.33052	1.62502	9.6515	15.746	3.2549	9.41493	16.0955	2.40558	6.67483	24.7302	9.07374	0.812279					0.182213	2.03399	0.319762	0.147701	2.21642	1.83237	2.33124	0.61495	4.1456	0.096777	6.50631	0.381811					2.07638	0.0992498	0.529789	0.0351557	0.131911	1.58103	0.0398738	3.0691	2.6328	0.0355896	1.85584	4.15121					0.0618693
	2.89297	2.70156	8.59851	18.1602	4.0974	8.27778	12.6773	2.69018	7.23779	22.7791	10.6411	0.585357					0.0967516	2.79537	0.290184	0.0334866	2.18066	1.09216	3.41335	0.27647	3.38087	0.26434	7.33719	0.0840208					2.48943	0.0893042	0.804535	0.0370542	0.198775	1.33262	0.104267	3.01079	2.29037	0.080918	3.41725	6.20103					0.0129469
	2.35981	1.95961	10.5446	21.1748	4.31824	5.79202	11.8056	4.57269	7.61895	21.9968	10.5125	2.25958					0.145399	2.86363	0.117209	0.0205257	1.92052	0.774244	2.01971	0.18541	3.13043	0.326225	9.2559	0.0248848					2.51142	0.0677549	0.819009	0.080077	0.569043	1.17177	0.0405421	2.39944	1.74423	0.0963568	1.72778	3.741					0.168786
	1.99882	3.00828	9.76175	17.2554	4.23455	5.87884	9.386	6.80896	7.5798	21.8425	8.08837	2.37761					0.150284	3.03293	0.128799	0.0699297	2.54592	0.87063	1.99489	0.268598	2.7519	0.337323	9.71447	0.0880403					3.29864	0.0507868	1.04505	0.0301537	0.269936	1.23462	0.0227224	2.38522	3.34046	0.0414666	1.05203	4.5658					0.0693255
	0.929063	5.11594	13.5612	18.5862	3.89605	3.75426	6.92573	6.18027	6.57098	22.4161	5.80594	3.12442					0.0165735	2.38611	0.19004	0.0184238	2.52151	0.765726	1.50083	0.380651	2.80273	0.422476	11.0693	0.0149129					4.90837	0.49574	0.746654	0.0240526	0.224063	0.342073	0.155786	2.18291	1.94577	0.0203985	0.797397	5.59781					0.0134828
	0.10111	6.34072	12.878	18.6497	4.51128	3.42585	6.31858	7.02723	6.15524	23.5679	5.48929	4.27428					0.422247	2.27347	0.0854264	0.0614363	1.59265	0.474657	1.51455	1.85231	2.87855	0.94929	12.2948	0.214018					5.98754	1.14613	0.648843	0.033279	0.252071	0.169808	0.0481562	1.77023	2.40286	0.0889809	0.941128	3.63087					0.0630987
	0.32819	8.02519	15.5025	19.3177	7.48377	2.3426	5.76999	6.54408	5.31841	24.4186	6.38771	4.30436					0.357161	2.00332	0.279143	0.0121845	1.1431	0.429919	2.1622	4.21435	5.76577	1.22961	10.6047	0.0643463					6.59922	1.58349	0.559482	0.0660363	0.0944564	0.355573	0.0279535	2.13515	2.21541	0.0483408	0.97959	3.68456					0.0877084
	0.305829	8.45379	18.0154	23.1233	11.3588	1.51601	6.87051	7.24272	4.5958	25.2476	6.02833	4.73095					0.158381	1.77893	0.3481	0.0676189	1.26699	0.61428	1.15631	3.38515	5.33631	1.73771	8.39011	0.0341834					6.49654	1.59839	2.28295	0.045728	0.167244	0.32689	0.0745073	2.15827	2.08022	0.0532715	0.642488	4.08127					0.00905518
	0.504113	9.55164	15.9443	18.3864	14.2287	2.24213	3.19296	8.15066	4.9721	24.8246	6.54767	5.14773					0.260787	2.24256	0.154542	0.0494173	1.25164	0.626754	1.13672	3.43729	5.25069	2.36168	6.2077	0.176118					6.34554	2.38476	2.31178	0.0874689	0.0790621	0.213483	0.0615595	2.82226	2.83157	0.175748	0.393664	3.78167					0.0223431
	0.668163	13.831	18.3337	18.3883	12.4615	0.46534	1.8609	8.99067	3.11162	24.1386	9.22159	5.371					0.167269	2.4964	0.199474	0.0117815	1.57496	0.702667	1.48025	2.76126	6.20109	3.74719	4.02936	0.0567426					5.98555	3.45268	1.5105	0.149527	0.215499	0.396949	0.087821	3.70156	4.33418	0.265074	0.296137	7.00237					0.0406388
	3.29521	14.4166	18.1458	25.4306	11.4734	0.395157	1.0698	12.7092	2.31624	21.4702	8.31029	6.86524					0.469468	1.32102	0.133182	0.0380631	2.55628	0.717638	1.29621	2.80664	5.75134	1.44042	5.25463	0.0529916					4.70992	5.03065	0.517587	0.0318716	0.876604	0.315808	0.124686	3.52655	3.50032	0.155617	0.571433	5.30416					0.0163446
	1.41378	16.8882	16.8653	22.435	11.9595	0.682228	1.03598	14.3517	1.27386	20.6193	9.52633	6.24321					0.235003	0.224957	0.117056	0.0873082	3.22545	1.18897	0.480556	2.29225	5.92739	1.0941	5.61151	0.0939901					3.43422	6.53636	0.918141	0.0304925	0.983522	0.261979	0.0284351	2.90481	3.32838	0.0664362	0.613131	4.99597					0.0253303
	1.59527	15.6251	16.2699	21.3017	11.5126	2.09982	0.532658	21.4236	0.443346	19.3767	14.0281	6.25961					0.440773	0.619341	0.131116	0.0791065	4.63515	1.24796	1.30198	1.41921	4.48608	1.99068	6.74601	0.0505941					3.64886	7.44332	0.5653	0.0566656	0.800728	0.202465	0.0525109	1.76246	3.88781	0.0540187	0.556304	8.52733					0.0474808
	1.42469	15.4236	17.5718	18.4477	12.4748	3.36296	2.81885	22.5223	0.360259	22.2921	13.8697	5.72155					0.250692	0.836715	0.0994281	0.0666454	4.64423	1.14928	0.456762	0.876336	6.55125	3.68874	7.72711	0.286293					2.42354	7.87488	1.04907	0.109001	0.734817	1.501	0.0532322	1.7058	4.04267	0.0558342	0.876376	5.81004					0.171573
	1.0489	15.4716	16.7009	24.2242	14.0697	1.80023	0.919907	24.1812	3.18066	17.503	17.517	9.5076					0.50321	1.03825	0.378545	0.0662859	4.07234	2.56346	0.562079	0.386962	4.88368	4.30354	9.96798	0.110747					1.97722	8.23884	1.46687	0.107368	0.809829	0.436097	0.0528964	1.28259	4.20548	0.0674854	0.703994	5.74918					0.115613
	1.06137	12.1903	18.2298	23.0265	10.2509	1.1143	2.34552	24.3188	3.26065	13.4556	17.5759	5.97505					0.252354	1.59754	0.0640096	0.0296662	3.55672	0.482862	0.380796	0.861167	4.24116	4.78407	11.3607	0.0396139					2.35003	8.06566	2.07482	0.0437847	0.815697	0.410215	0.139721	1.36672	5.19426	0.044463	0.62118	4.24847					0.197653
	0.942656	8.40461	18.3341	18.8911	8.36901	2.74986	1.68284	24.6488	4.7027	10.1579	14.3509	7.00137					0.240728	1.79692	0.266429	0.0433936	3.53344	0.896237	0.700728	1.48103	3.50737	5.03173	14.1651	0.0767042					1.69357	7.72883	2.62123	0.0739323	0.767897	1.43996	0.00622775	1.31513	5.40526	0.0690078	1.1989	4.88277					0.258588
	0.876679	3.7067	18.7946	19.1148	4.56175	2.02993	1.56615	21.6819	4.56422	8.217	16.0641	6.09853					0.159513	1.22059	0.279767	0.0150709	4.46167	0.706905	3.17307	2.03751	3.29752	4.27538	12.909	0.13514					1.24076	6.43493	2.20908	0.117003	0.699753	0.441114	0.0470155	1.13069	4.37223	0.107878	1.1454	8.78229					0.0623737
	3.08171	1.29821	16.2076	16.8965	0.578793	2.69168	1.74073	22.1475	6.29927	4.34886	14.7578	6.26774					0.204686	2.04799	0.0650608	0.0519561	2.84388	0.274274	3.80401	2.93623	2.25308	6.03855	16.0072	0.239564					1.57306	5.0637	2.6381	0.0890895	1.02118	0.374185	0.0409462	1.41423	3.48595	0.00469917	1.84163	7.84819					0.0196624
	1.38728	3.55903	17.6984	17.2217	2.65161	2.92375	2.606	23.8102	7.15974	1.83263	10.4198	4.01038					0.0979488	1.77482	0.249533	0.0348517	3.04183	0.208339	3.39414	3.47622	2.01548	5.73364	15.0121	0.762247					1.18581	4.22586	2.01109	0.1098	2.72959	0.636193	0.0598783	1.27213	3.66373	0.024509	1.84614	9.89883					0.171463
	1.10642	5.03123	17.7989	15.133	5.43588	5.67909	2.53065	19.57	9.55002	0.302759	7.77319	3.48733					0.33508	1.28894	0.729853	0.081134	2.70141	0.365338	1.73296	3.86202	1.43672	5.13619	13.8747	0.619806					0.812722	2.70205	2.02537	0.126523	3.01854	1.52098	0.227591	1.90652	3.44795	0.227501	1.55081	11.2236					0.31762
	0.50373	5.20749	14.4897	12.9641	7.55626	5.10645	3.24011	19.9415	8.55429	0.958055	6.27778	1.82074					0.145237	0.931805	0.351753	0.0323771	1.56757	0.945105	0.865858	3.69284	1.08101	4.84638	14.1398	1.56939					0.361879	2.55489	1.81763	0.0390467	2.16487	1.78272	0.0696477	1.74712	4.43338	0.0756967	0.487171	11.3181					0.923344
	0.740093	5.46921	19.9218	10.2238	6.16878	4.76546	3.85369	22.5135	6.36364	3.80671	3.90446	1.45514					0.102858	0.767505	0.231239	0.0842385	0.427622	1.08968	0.637179	5.44295	1.95031	4.263	11.3734	2.91829					0.352701	1.66351	1.59908	0.0795115	2.66259	1.62667	0.121998	2.51536	4.09255	0.105097	0.193392	12.1829					1.71623
	1.6309	5.43677	14.5163	8.32712	7.91764	4.33711	3.96028	23.1603	5.22708	4.50012	3.41821	0.901234					0.237355	0.548841	0.305207	0.0883031	1.86319	1.46359	0.566352	6.07564	2.39071	3.88077	10.1743	2.71481					0.410094	0.6892	1.17493	0.049733	2.8253	1.82513	0.143228	3.07929	4.36961	0.0884802	0.386835	11.5005					1.03831
	1.80959	6.43688	15.113	5.48866	6.28597	5.64579	4.25877	21.2861	4.83782	2.13721	3.33858	2.80406					0.0964079	1.24501	0.228246	0.102137	4.69944	1.67722	0.735631	7.6661	2.61838	4.45619	7.70904	3.0091					0.540034	0.191242	0.822813	0.0146273	3.9787	1.82958	0.087958	2.31708	3.59984	0.0508078	0.492926	9.13225					0.96293
	0.607755	6.38611	10.5548	3.43005	5.21419	8.40378	3.36561	20.7417	4.21991	2.04438	2.45124	6.55316					0.163161	1.38922	0.12383	0.111033	4.87664	1.93847	0.278103	9.16769	3.75868	4.35131	4.805	3.06844					0.283332	0.345099	0.512102	0.027588	4.47353	1.4723	0.252464	2.34199	2.69357	0.0530167	2.46227	7.70181					1.03148
	0.226037	5.28735	8.81347	1.00017	3.87479	8.20117	1.88295	18.861	3.21679	1.90751	3.77377	12.9112					0.219283	1.86232	0.0757745	0.202599	5.84023	1.96732	0.372185	8.46405	5.91542	4.09134	2.24462	4.35168					0.450534	1.05772	0.143839	0.0682325	6.33171	1.25443	0.142794	1.95422	2.0441	0.0384281	2.8774	10.8095					0.932079
	0.589759	3.99361	5.87611	1.3586	2.52212	8.41583	1.77192	18.7695	2.48935	2.66355	1.57501	10.3482					0.881173	2.81132	0.428344	0.132979	9.44268	1.4778	0.842214	8.96441	6.2149	4.02077	1.22754	1.99098					0.595137	1.55512	0.136342	0.0189889	6.54633	1.05428	0.0657966	2.00566	2.04655	0.0422319	2.74768	6.88948					0.392887
	0.47977	2.59127	5.6907	2.128	0.877582	10.4063	1.97115	17.5062	1.73924	4.21916	1.27248	12.803					0.180827	3.14114	0.162124	0.0795661	10.7522	1.22497	0.555339	7.40536	5.30665	2.47667	0.844751	3.15824					0.284051	0.853684	0.0184952	0.12627	8.53142	0.89312	0.0648383	2.1045	1.92554	0.0351383	2.50269	5.31223					0.442314
	1.3894	1.323	7.51456	3.40845	1.03802	13.9111	1.7698	24.3807	1.06769	6.42632	2.45354	14.4138					0.356148	2.70606	0.210517	0.0582091	12.3639	1.05263	0.854734	5.69398	7.71137	1.37128	4.61439	3.15453					0.522263	0.983426	0.164657	0.031754	8.27896	0.798534	0.112047	1.2306	1.23554	0.152826	2.44597	3.6675					0.399255
	2.88746	1.77532	5.097	2.46255	2.96174	8.67031	3.16467	18.1701	0.709173	5.36246	4.05963	14.8271					0.248972	4.37522	0.269593	0.0459629	9.68993	0.817118	0.406113	3.2197	6.98299	0.938536	4.67532	3.7516					0.492332	0.709063	0.160533	0.00811683	7.57866	0.445693	0.0741342	0.901805	0.874506	0.0355883	2.17295	1.73769					0.0690953
	5.3449	3.15498	3.26408	1.41166	3.78186	12.2818	3.716	17.183	0.470745	6.39625	3.53824	14.0024					0.323074	2.34768	0.118215	0.0699542	7.11572	1.37179	0.232314	5.3158	6.08111	0.270389	4.37069	4.22974					0.368054	0.782981	0.234842	0.019746	7.4127	0.15328	0.126719	0.568976	0.983398	0.120322	1.75333	0.0982543					0.121349
	4.43562	3.26653	6.7189	1.63146	4.3028	7.46695	6.77598	17.2766	0.394167	8.477	2.99873	12.4671					0.601198	2.82857	0.170824	0.183148	5.78415	1.59109	0.996498	3.5049	6.45058	0.332557	3.61209	5.91574					0.273426	0.199741	0.237522	0.0864018	5.70181	0.290881	0.0408143	0.325031	1.35929	0.203541	1.17914	1.21089					0.0678975
	5.353	4.93988	6.74168	2.82304	4.649	5.36093	6.09629	15.9697	0.377541	8.32423	3.32186	10.4623					1.93096	2.2298	0.333149	0.139192	3.27484	2.0741	0.464129	2.69548	6.38497	0.0954143	4.47972	6.1417					0.599768	0.563998	0.145176	0.0782168	4.51883	0.348373	0.0472488	1.112	0.789761	0.121397	0.812878	0.677861					0.0729729
	4.79748	6.11673	4.17328	2.75346	3.00594	2.67352	6.43701	15.3694	2.0624	5.64601	1.84884	6.53273					2.79997	3.57685	4.33387	1.17912	4.11279	5.36017	5.82944	1.98461	6.62375	5.00906	5.41186	7.25999					0.57175	1.62104	0.530193	0.703195	5.74682	8.38757	0.05529	2.92854	0.438745	0.773946	0.545228	2.13202					0.367624
	5.30219	6.10251	4.47061	1.47575	2.94586	1.86276	8.47718	14.1228	4.6039	4.272	0.82054	4.19972					2.14948	4.0862	4.6915	1.55557	6.74682	3.61523	10.4974	1.3207	4.91541	6.09285	6.87742	4.15192					0.0235095	1.83496	1.44475	3.1756	12.0037	9.67707	0.485825	2.77081	2.53738	0.816795	0.812204	3.95436					1.72981
	3.32765	5.49366	2.77038	1.78704	3.00024	1.46797	10.6315	10.7131	6.23809	4.86538	1.23507	2.70171					1.58532	6.67703	5.7753	1.03232	4.54935	2.80399	9.23277	0.544132	3.66997	5.86029	5.37717	3.38306					0.224156	1.87708	1.67818	3.19105	10.5351	6.44868	0.348272	3.9894	1.34222	0.767753	1.32409	6.84293					1.66831
	2.78472	3.68877	6.51817	2.20579	2.94137	1.41557	13.2561	7.73967	8.6508	3.64488	2.40558	0.621381					1.82059	7.57043	7.14268	0.763644	2.36124	3.61536	9.36867	0.476297	2.64513	5.03198	3.49081	0.334348					0.531267	1.68792	1.46032	1.91719	15.5557	5.62513	0.241723	2.47494	0.920297	0.774772	1.01897	2.74828					1.57306
	2.78177	3.98506	3.82716	3.0692	3.0192	6.5935	16.4303	4.06937	8.5353	8.03926	3.42397	1.63324					1.53086	9.08013	6.02503	1.09264	2.45025	3.54165	8.03482	0.215137	2.31412	2.7824	2.86631	0.364322					1.18263	1.35627	2.21586	0.930869	13.0118	4.62879	0.343232	2.00369	0.601421	0.0698286	1.38921	1.76432					1.53208
	1.74964	5.51169	0.998262	4.5794	2.86189	2.27772	20.653	1.48337	8.89261	8.66793	4.94329	2.26835					1.53687	10.2215	7.67253	0.931286	2.33185	3.76287	6.13429	0.232171	1.99822	0.147038	2.41451	0.391882					0.673464	2.0291	2.37507	0.680317	13.0852	4.21001	0.285947	0.9783	0.486306	0.0222918	0.932152	2.50485					1.25585
	1.6255	4.77135	8.60996	8.02568	2.81216	4.38556	20.8513	1.09316	7.21808	12.7139	5.79936	4.89871					1.59234	9.62612	5.54574	1.27369	2.77981	5.232	5.29532	0.33674	1.51286	3.04416	1.99938	0.178756					0.738124	2.22099	2.31571	1.3437	9.64883	3.12383	0.53578	0.563851	0.505323	0.338503	0.38528	0.573859					1.11251
	3.12645	4.69886	5.88248	9.00377	3.44329	4.39474	19.4371	1.07351	8.10488	11.4237	6.96704	8.08941					0.449284	8.58364	5.23438	1.39957	5.48109	6.58273	4.05001	0.31864	1.46321	4.25514	2.02385	0.344471					1.13666	1.41881	2.12086	1.21049	6.09414	3.23768	0.639154	0.635337	0.489966	0.579695	1.25545	2.26253					1.70551
	2.03099	4.92126	5.90084	10.8202	4.21543	2.81443	21.4411	0.993117	5.00768	12.7263	4.95442	10.0658					0.745116	7.97417	6.784	1.58927	2.02763	5.89907	4.87614	0.213717	1.19092	5.48425	2.50454	1.6624					1.07643	1.62028	2.38223	1.2265	6.28567	5.86908	1.19308	1.20366	0.939109	0.179989	1.73577	3.12514					6.03983
	1.83515	3.96073	5.52035	11.5194	4.28093	3.86192	17.6292	1.20803	3.06239	12.3132	4.28106	10.2896					0.430279	7.86244	10.0767	2.05715	0.842981	6.20953	5.54387	0.111601	0.831439	6.00368	4.61894	3.48606					0.55222	2.16658	2.1679	1.2982	3.0885	9.24337	2.36831	0.787464	1.28099	0.733661	3.83885	2.23301					11.3693
	0.683538	5.86324	4.8269	13.381	4.79914	7.01384	19.3161	1.38782	0.977674	14.9303	5.84353	14.11					0.195863	5.54322	10.1765	2.27782	1.59287	5.79128	5.32613	0.344916	0.684258	5.98435	5.21867	5.57083					0.725356	1.93459	4.75977	1.33304	3.54837	8.91175	1.94979	0.751477	1.03092	0.980282	6.76184	0.725569					16.9286
	1.5766	3.62159	3.48105	9.72368	3.24332	6.58432	20.6042	1.57754	0.468993	16.0932	3.57184	12.169					0.45908	5.92404	13.6687	1.55567	3.98818	3.55802	6.8196	0.34737	0.927759	5.4081	7.19848	8.57446					0.66957	1.91706	4.61704	1.75712	5.55406	9.12231	2.09357	0.657701	0.800075	0.717854	8.55801	3.02006					20.5913
	1.43249	5.39609	2.5892	9.48091	3.36439	9.69178	17.1997	1.60332	0.103785	15.9401	3.68854	14.9426					0.0215901	4.04848	12.8026	1.73496	4.08835	2.87038	6.61582	0.188379	1.34403	5.42289	6.71759	11.3484					0.592697	2.22091	9.48265	2.15565	8.11818	11.0323	3.35832	0.336702	0.456669	0.483122	12.0298	7.53094					25.0574
	1.82898	3.20404	2.19036	9.67021	2.99605	7.29723	15.2311	1.68596	0.738299	19.3042	3.25311	12.6817					0.439975	2.34683	10.9123	1.66431	3.07844	2.16557	7.08974	0.4396	0.588576	7.78613	6.35097	12.2888					0.662394	2.83612	10.1758	1.8106	8.5619	8.82091	4.98535	0.494098	0.349715	0.0576164	16.504	1.70135					26.3618
	2.96707	4.77706	0.568684	8.75075	2.88679	6.01409	15.9185	1.53453	0.834143	17.8179	2.17167	11.46					0.680735	2.70811	7.5127	1.40102	4.0786	2.32171	8.4769	0.415731	0.760774	8.69108	5.1929	14.9118					0.576356	2.63236	10.7481	1.91671	9.3742	8.09228	5.63787	1.41691	0.276958	0.398114	14.9964	3.98859					23.9689
	4.50779	5.31091	0.570054	7.99632	2.79818	5.21771	11.739	0.9675	2.0347	19.51	0.991545	11.7625					0.392035	3.4236	5.05158	2.32971	3.27309	3.97825	7.68155	0.734993	0.836912	7.71899	4.3399	12.583					0.372762	1.40506	6.86618	1.33216	12.9686	9.23856	7.22461	0.605757	0.0768997	0.182638	20.6818	2.89569					20.232
	3.47465	6.14202	1.07107	9.43631	0.549767	4.50443	8.87033	0.454423	1.21897	18.8266	0.812623	9.70405					0.211829	3.49112	3.53966	1.36746	2.29288	5.33642	6.32733	0.395189	0.275289	8.27378	4.04662	10.9351					0.424591	0.689453	5.49245	1.11648	9.24793	11.6347	5.94601	0.379666	0.0962322	0.578529	16.7121	2.37265					17.7286
	3.56777	5.40736	0.736689	12.2145	1.98514	3.65117	5.89727	0.512633	1.74049	13.646	0.701517	9.30403					0.434778	3.57988	1.39407	0.0967705	2.07208	4.56098	6.12586	0.354534	0.520087	6.48503	3.14969	10.8114					0.235769	0.824112	4.44914	1.11923	8.27046	14.5543	6.03351	0.405018	1.21352	0.292276	15.3599	3.06984					15.8423
	2.89925	4.46141	0.707007	14.5792	2.26438	2.73917	4.00083	1.16601	3.59491	12.612	1.50588	9.93426					0.726124	2.83883	0.432697	1.5566	1.7856	3.9948	3.53333	0.21534	2.63376	5.81775	2.15577	9.94964					0.227146	0.560163	3.37339	0.539242	8.60865	15.517	7.44467	0.375927	1.85882	0.412398	11.873	1.3634					15.8131
	3.76424	5.7935	0.58806	17.417	5.3502	2.39385	2.56167	2.54033	6.50778	13.8586	2.9093	8.65386					1.03842	3.03895	0.294834	0.733498	1.26212	4.08114	2.89385	0.198747	3.50618	6.24772	1.3087	8.05092					0.214745	0.157404	2.24624	0.179393	10.1563	15.7469	6.93725	0.286992	2.80136	0.349017	7.33912	1.4877					15.1041
	2.41809	8.53168	0.480057	19.0369	7.01535	3.02023	2.29783	4.09796	12.4006	11.1325	2.3177	6.12707					1.03569	4.63471	0.0724844	0.0333885	0.656173	4.08934	3.10126	0.228964	5.06604	10.1769	1.26497	5.62576					0.135677	0.0365723	1.54827	0.10454	8.6141	18.6662	6.1063	0.195061	4.66066	0.296496	3.21976	1.33097					16.0744
	2.20709	12.1066	0.521607	19.0515	9.07013	3.19197	0.857765	4.70222	15.5118	15.6312	2.37113	3.74649					1.08394	3.59282	0.230182	0.130001	0.47014	3.43872	3.2359	0.117374	7.45672	8.44217	0.775871	5.4612					0.0539124	0.170624	0.886035	0.0440234	8.28814	21.5343	5.43761	0.18711	5.68145	0.12588	1.75543	0.716155					16.4872
	2.03447	15.1618	0.145578	19.823	10.9951	3.54462	0.37522	5.74382	17.3539	12.952	1.95536	3.6552					1.46069	4.24021	0.774688	0.252872	0.261817	2.59066	3.77053	0.246343	8.64252	7.86478	0.0325161	4.51597					0.129311	0.102583	0.976445	0.20038	6.37788	19.558	4.23104	0.239562	5.59119	0.163049	0.884567	0.235696					17.4583
	2.72465	17.5104	0.0998053	19.8905	11.2075	3.24929	1.06915	8.34996	20.1195	15.1343	1.20403	4.2664					0.583617	4.41076	0.487864	0.178927	0.214895	1.52006	4.19853	0.206855	9.43602	7.76313	2.64908	4.01268					0.275208	0.232586	0.977558	0.188618	4.60085	16.0427	4.77881	0.111391	5.82004	0.148093	0.359801	0.289439					18.2079
	3.69769	18.7648	0.395365	24.11	13.7046	4.80657	1.36813	9.4453	20.9128	15.4892	0.777137	4.46649					1.11663	5.61214	0.476993	0.237147	0.297755	1.45076	4.5347	0.089982	9.84143	7.94376	1.47088	7.32107					0.0808503	0.208259	2.44887	0.173306	3.72678	12.5852	4.87557	0.130928	5.28139	0.116257	1.07329	0.21768					18.0007
	3.23395	19.2673	0.122028	23.6787	14.366	7.81703	1.06689	10.5575	23.4159	18.2753	0.34023	7.20556					1.69229	6.37289	0.611947	0.220758	0.28745	2.76869	5.40445	0.0617355	8.86021	7.62477	0.946508	7.84812					0.199281	0.0785858	1.89126	0.256025	4.06711	8.64547	2.85688	0.143521	5.11911	0.194102	1.23411	0.187658					17.6374
	2.1025	19.9374	0.246953	19.8574	12.1006	7.45518	0.949805	8.81255	24.7549	21.7	0.16183	7.56077					1.83937	7.2327	1.21709	0.174831	0.14023	4.01921	4.01858	0.0351958	7.59334	7.76642	0.701524	11.0072					0.112415	0.195832	1.94496	0.160084	1.89324	6.5512	2.15567	0.118452	4.88926	0.0764769	1.41309	0.0941053					16.5882
	1.39206	19.2398	0.608257	20.8341	10.1354	6.84907	1.17914	10.822	25.8146	21.5747	0.166158	11.8938					1.93739	9.91551	1.6639	0.18848	0.165229	4.27129	3.60734	0.0429324	6.96126	6.81709	0.759183	11.4991					0.0571412	0.131263	1.57012	0.173546	0.864281	4.52039	0.991337	0.0580032	5.50978	0.0372883	1.20994	0.217381					14.9938
	2.59296	19.5429	0.225022	17.691	8.80209	7.3716	0.573474	10.8665	24.8017	24.2887	0.246768	15.0841					1.99458	8.76691	0.891941	0.138379	0.310843	4.01965	3.50481	0.0456567	8.09372	6.49318	0.717089	11.8233					0.0324452	0.169897	1.12298	0.198881	0.515564	1.82414	0.293342	0.0221985	5.09408	0.0825391	0.931907	0.112398					13.8476
	2.52971	21.1629	0.836245	20.3517	7.07332	7.10058	0.35661	10.9397	22.0121	21.6086	0.740516	17.8957					1.90823	12.0487	0.898293	0.0495857	0.218608	7.24771	2.05062	0.149646	10.4057	7.15632	0.481804	10.3166					0.0580618	0.0749774	0.823027	0.149666	0.29176	0.7291	1.12566	0.217905	5.62071	0.0360148	0.680339	0.0834776					13.4492
	2.90423	16.5589	2.47376	21.431	5.9908	7.9452	1.4146	8.62548	22.4021	27.7472	2.27197	19.7896					1.39669	12.3765	1.24237	1.23548	0.683929	10.0172	6.31561	1.72019	13.1118	4.33326	0.707896	8.10621					0.274129	0.629709	0.618595	0.160315	2.35345	2.65502	3.01608	2.09243	8.80129	0.21984	1.53037	0.137239					13.0633
	4.08188	15.0244	5.9385	19.652	6.71668	6.48222	0.568949	7.15893	21.9056	18.1784	1.34023	23.1068					1.73367	14.9486	2.25083	0.372242	1.0355	10.5811	4.13265	2.43235	14.2135	2.21589	2.46289	6.919					0.207365	0.526635	0.358004	1.95417	3.44941	5.09395	3.78772	3.58299	10.8534	0.460558	4.26033	1.23477					13.8986
	4.34853	12.3716	17.8051	14.8434	9.36911	4.86946	0.908764	3.57023	20.9284	14.6148	2.88644	23.8709					1.51844	15.0457	4.58342	1.28512	2.03081	10.3661	2.55472	2.17671	17.0395	1.80827	2.30763	4.05772					0.428287	0.844557	0.773708	1.79342	3.16296	6.28454	2.67975	5.33071	17.5327	1.72407	4.56629	5.04559					16.8904
	4.71959	11.9884	22.1241	10.1516	10.9248	3.95176	1.97231	2.49603	16.2988	13.5422	6.94082	22.9392					0.968668	8.81919	8.62086	3.49009	2.28672	8.85709	2.60639	1.36634	20.2323	1.33422	1.84445	2.46515					0.320566	1.43944	0.51995	1.44591	8.00252	8.71087	4.41896	6.52529	21.5957	2.76642	3.99538	3.24869					17.3772
	3.52133	11.0336	12.8657	5.08632	12.5411	2.9117	3.68414	1.88477	12.1312	12.1712	7.64398	22.2541					3.57154	2.86618	9.2224	3.18196	2.17398	6.92469	3.48793	1.99718	20.9593	1.41737	1.33853	2.91219					0.201408	1.85303	1.9409	1.38846	12.8936	11.3136	7.59724	6.41319	21.5325	2.60736	10.0166	3.11848					16.3568
	6.40527	10.9621	15.7261	11.0662	14.3649	1.85189	3.01552	1.29694	9.1266	10.2882	5.1969	20.9937					3.6822	2.158	14.6639	5.46334	1.21006	5.03212	2.19077	4.14393	20.5909	2.44125	1.67225	2.34677					0.356447	1.81638	2.0191	1.91131	16.2413	14.671	9.49343	6.56498	23.9754	1.89713	3.23027	2.48865					15.7763
	6.14994	6.8609	12.0717	4.20393	14.9559	1.03821	4.75736	1.25709	6.17194	8.46467	4.36946	17.3821					6.08544	2.00034	16.9281	6.20125	0.965428	3.20124	1.668	4.22776	19.5887	2.27689	0.361382	2.23812					0.604388	2.14691	2.16235	2.74522	19.0161	15.5778	9.47172	8.17037	25.9459	0.487085	6.19805	2.30532					15.8914
	12.2942	3.76698	9.0287	3.81732	11.4856	1.36455	1.89515	0.730018	1.56014	7.57116	4.32895	16.6778					5.91094	1.96843	15.3563	8.74366	0.497514	3.10699	1.10814	3.91969	19.2399	3.54502	2.94672	3.48745					1.14351	1.98005	1.33508	2.07832	19.7334	15.6762	13.9311	6.37311	27.6076	1.16349	11.4426	1.68953					18.0811
	11.7233	1.70145	7.1532	0.652	8.24299	3.16653	1.17828	0.704653	1.95526	7.07501	4.65454	15.2681					7.77371	2.08555	15.6083	9.26695	0.433379	0.895869	0.774925	2.70753	20.5631	3.14984	3.28942	3.74279					1.65206	1.61828	0.808732	1.82538	20.3659	14.5304	10.6978	7.67036	26.5878	2.82573	8.31227	4.56502					16.6471
	12.7825	0.504802	4.19507	0.224449	2.52939	2.70484	1.25166	3.66122	1.71521	6.17779	4.03708	15.0534					6.45991	2.29895	12.858	13.7261	0.128922	0.831219	0.618285	1.78702	22.4078	2.79636	4.17923	5.3552					1.69441	1.77139	0.475281	1.6745	25.8385	14.8118	12.2888	4.87079	26.8034	3.66121	9.21827	4.69792					17.1189
	14.9146	1.23852	2.90825	1.11999	1.70722	0.695738	3.41084	2.20098	1.87565	6.44569	3.57097	16.3375					6.59844	2.71229	13.0817	13.7544	0.239989	1.47504	0.856917	2.46279	21.356	2.16584	4.75756	6.67266					1.39268	1.76759	0.433658	1.62751	25.2999	11.8334	15.9848	4.49603	26.592	5.57403	8.22655	9.67538					18.4257
	15.58	1.95256	1.79302	1.25279	4.16823	1.77255	4.01869	1.39266	2.66315	5.16427	3.99748	13.8236					6.65754	1.91315	10.0869	17.3068	0.432707	1.05136	2.37336	4.0283	21.5088	1.48947	6.92115	7.99491					1.71993	1.5636	3.92081	2.59425	22.9813	10.3456	13.2508	4.31848	23.3072	3.84271	6.38327	7.2673					21.694
	15.8109	2.55115	2.22919	0.26808	5.02993	4.21497	6.39192	2.09973	2.3667	5.83364	3.51863	15.2324					6.5746	2.52848	6.18671	19.1767	0.288796	1.07051	2.48987	4.57853	21.9999	2.09275	7.29032	9.68515					2.24078	1.90551	1.56199	1.48589	21.0685	11.0061	16.6249	4.16209	22.1278	3.58957	6.42557	5.86018					20.7319
	17.866	3.0182	2.87715	4.0124	4.36468	8.50311	8.80771	1.48375	1.9	6.99737	3.10339	14.5977					7.98101	1.96201	4.80826	20.3683	0.557291	1.49036	2.51693	6.8483	20.8495	2.96952	6.55808	12.0326					2.65354	1.26901	2.07001	1.41977	20.9983	10.4065	18.7746	4.83653	19.46	4.41736	5.80203	6.57208					19.1403
	14.3901	2.84277	4.3134	2.09755	4.39931	10.945	10.429	1.04434	2.06758	5.6923	4.34266	13.4255					10.1583	2.298	3.02096	18.2385	0.418802	1.08198	1.68026	4.86019	19.8085	3.62506	7.45559	12.651					2.31068	0.809202	1.89517	2.15943	19.2152	10.5359	19.4828	7.87346	20.5336	4.01885	5.51639	5.15255					14.5288
	15.4273	2.36599	3.87905	2.30935	4.44166	15.8237	7.33575	0.934583	1.68307	6.38594	2.94236	14.2031					10.4902	1.58481	1.47023	20.1332	0.439427	0.927505	1.27415	4.9852	18.1098	2.96327	7.05624	11.122					1.4544	0.665076	1.30826	1.20398	19.4325	9.17584	15.7114	8.26535	20.3594	4.01085	3.9942	4.23526					12.0824
	17.1168	2.69437	3.41637	1.47237	3.28611	17.5347	9.31928	0.637965	1.68338	7.16068	2.67137	11.8013					10.4793	1.64563	0.694598	18.5862	0.535339	1.00612	0.857073	3.29424	17.1364	5.12387	6.33845	12.4309					1.15161	0.387545	0.939211	0.617534	15.0677	8.87805	10.1799	6.82579	18.6702	4.18585	2.78616	3.17498					9.53128
	16.433	3.86984	2.47978	3.99229	2.21303	19.6627	8.23333	0.272976	0.751779	8.75839	1.63864	11.9303					14.0669	2.53593	0.27553	17.2112	0.369345	1.04559	0.363588	6.74578	17.1469	5.79072	4.67476	9.57958					0.906654	0.190044	0.878624	0.500362	16.2727	8.54791	8.46719	5.65828	18.2149	3.13259	1.95642	2.21866					7.10306
	12.9481	5.00495	2.29341	4.83155	1.46984	19.7828	10.5768	0.0519585	0.78295	12.0604	1.37871	12.3813					12.2815	2.21215	0.89715	14.8522	0.248063	0.958771	0.563462	4.9944	16.5654	5.27938	3.88544	8.12184					0.589337	0.110058	0.665151	0.35915	17.3575	8.82916	6.69064	5.47014	17.9377	1.70707	1.435	3.33794					4.55935
	10.3429	5.51874	1.61109	3.04927	0.802347	24.3369	5.74767	0.600751	1.3094	11.6358	1.06416	13.678					17.9853	2.08943	0.857106	15.2176	0.209533	0.612026	0.217885	6.91457	16.5604	4.45756	2.84353	5.82557					0.300038	0.0878346	0.46657	0.987322	12.9734	9.93008	4.02755	5.38508	18.1589	1.96647	1.07431	3.06153					3.4321
	10.309	8.60178	0.762221	1.48986	1.25611	24.7442	5.66313	0.559492	2.79145	14.361	3.27966	11.6134					18.1297	3.18303	0.930486	13.5176	0.0966701	0.47279	0.596071	4.59714	17.8031	5.41839	2.52677	3.59865					0.224053	0.111858	0.116114	0.845827	9.76969	10.6655	1.12905	5.32412	15.7148	1.89792	0.962137	2.26566					1.81271
	7.31391	3.59403	0.116334	1.63411	1.76341	24.668	4.72237	0.670086	5.44235	13.4851	1.50859	12.5808					18.9759	3.07879	1.73879	13.2459	0.0795099	0.392847	0.616128	3.05573	18.3696	6.19291	3.09292	1.4842					0.215608	0.190331	0.0477924	0.180156	8.78489	12.1054	1.21399	5.85566	12.098	1.04946	1.30061	1.81152					0.863977
	5.77268	2.00722	0.244709	1.19532	0.541294	23.7961	2.92661	1.5418	6.18751	11.2597	1.69089	11.6642					20.0473	2.39674	1.81379	12.7016	0.0338316	0.327418	0.183839	2.41625	15.0334	5.99735	3.26968	1.87042					0.0877151	0.222029	0.0568336	0.166824	5.84209	12.1973	1.70806	8.36572	9.49005	0.399927	1.00732	1.3336					0.0487951
	4.8041	0.903255	0.569652	0.616455	0.971031	22.409	2.62683	1.08919	6.6371	11.4162	1.22037	11.1772					22.6297	2.81949	4.31958	12.6952	0.17449	0.125185	0.992875	1.83749	16.7418	5.29506	4.12064	1.60399					0.0919243	0.058353	0.145055	0.280057	5.48595	11.2486	2.17886	6.03549	8.60578	0.472838	1.29689	0.580081					0.21663
	3.73068	1.99274	0.300728	0.285979	1.62454	21.495	1.74582	0.791398	8.1977	11.1906	0.974218	8.96811					24.0723	1.6338	2.74386	12.558	0.0917432	0.688042	0.420751	1.07884	13.3502	4.91984	4.64942	0.832901					0.131476	0.0717999	0.0425256	0.230333	4.28097	10.4018	2.31191	7.82658	7.35922	0.512278	1.38429	0.815278					0.983026
	2.93036	1.00051	0.267536	0.419369	1.72628	18.4174	1.24497	1.22682	6.20703	8.95394	1.2931	8.03315					22.099	2.1504	3.07146	11.6158	0.0469447	0.310409	0.639163	0.726051	13.55	4.03935	7.22229	1.50644					0.0886157	0.159119	0.0692743	0.195488	4.38497	9.97649	2.14841	8.10032	8.43526	0.508487	0.992078	0.622729					1.06996
	2.91983	0.572305	0.604782	0.365649	2.41645	12.3458	0.98356	0.93145	5.52331	9.36857	0.940344	5.36317					21.9077	4.0266	3.27751	12.3164	0.0480775	0.079178	0.5733	0.107903	15.4433	5.70079	6.984	1.08559					0.0738436	0.19801	0.18201	0.189029	5.30083	10.395	2.18435	8.9142	6.35337	0.108744	0.528261	0.751358					1.09684
	3.0377	0.520011	0.621695	0.295862	3.36888	8.47694	0.375053	0.142643	3.70175	6.04454	1.49635	3.17019					21.5831	3.87094	3.35638	8.97037	0.074294	0.17815	0.306194	0.111821	14.058	4.17261	7.00411	1.71551					0.129369	0.0157327	0.170324	0.213949	4.73234	12.6249	1.90806	9.26013	5.36294	0.0551367	0.453105	1.84042					1.04124
	4.98218	1.53268	0.705969	0.264498	3.43837	5.22395	0.474938	0.825301	2.35804	4.58652	0.410569	2.15023					20.5334	5.84781	3.62457	8.66421	0.197584	0.144373	0.469288	2.18332	11.6871	4.8187	6.49668	0.840559					0.0818526	0.370622	0.120583	0.223804	4.65556	11.1138	4.18958	9.2287	7.88692	0.382048	0.357723	1.14072					0.832075
	4.17902	1.70425	0.360425	0.245349	2.02516	2.69161	0.635967	0.397701	0.331798	5.3822	1.59444	0.733311					20.1232	8.19917	3.80519	6.81153	0.148748	0.217024	0.290905	0.876945	9.94443	4.17299	5.95613	0.9949					0.0919718	0.227264	0.113248	0.155412	4.39953	12.1484	2.51174	10.1978	5.15038	0.502376	0.902652	0.566222					0.722587
	5.96172	2.66762	0.302075	1.90671	1.6061	1.50065	0.929018	1.20274	1.98847	2.40151	0.551557	0.327466					21.6129	10.6496	2.58398	8.05695	0.103604	0.58035	1.3768	0.571795	11.1733	0.915333	3.47866	4.20917					0.297795	0.244619	0.071119	0.892656	6.12158	15.9574	1.76693	13.3171	9.23639	0.749047	2.14192	0.843352					0.842474
	8.37456	1.97516	0.778349	1.24657	0.578879	0.314698	1.09034	5.46879	2.30419	1.8419	1.61623	0.934712					20.9807	14.1635	0.0797344	6.38937	0.265639	1.9628	0.464078	0.594493	8.27984	3.87003	2.25913	2.81355					0.321735	0.645492	0.38609	2.34799	4.1579	15.4516	2.3796	18.667	9.26766	0.721891	4.00735	2.5695					1.25143
	5.87191	1.07079	1.89065	1.9315	0.259235	1.8607	1.29071	2.14116	2.48682	1.32805	0.345255	1.70058					21.334	13.5085	1.03382	7.08763	0.193888	3.01465	0.144357	0.903529	6.10519	3.35352	1.81344	2.95886					0.833119	1.13311	3.58031	3.57569	5.14518	15.9113	1.88232	17.5683	9.74063	0.523132	1.90644	3.48415					1.82889
	8.88671	0.181646	0.924656	3.17991	0.39442	1.67403	0.86347	2.87481	2.67072	0.785726	0.727262	2.08134					18.555	9.60109	1.56733	5.34665	0.716652	1.82977	0.373106	0.473984	7.62641	3.11241	1.57856	3.39007					1.18075	0.944344	1.44108	3.87496	7.77289	17.051	1.79804	18.3776	12.3199	1.01741	0.863618	4.85405					2.11969
	12.857	1.23884	1.5059	3.06362	0.25301	2.96208	0.805273	2.55024	2.85736	1.05384	1.17122	1.23852					17.5759	9.24576	3.06386	6.41679	1.81093	1.12773	0.279826	0.411458	2.68777	3.29372	1.75894	4.93183					1.62545	0.927363	1.89664	2.86917	5.83312	17.2164	2.63036	20.0696	11.3102	1.79242	0.951398	4.58713					1.12052
	10.3602	2.1647	1.59078	1.56786	0.34903	3.29838	2.27557	3.06553	2.64786	0.703948	0.841118	1.43539					15.4289	8.6708	3.24597	5.95546	2.99415	1.54117	0.189491	0.63431	1.57808	2.60498	1.93846	6.50811					1.2125	0.801507	2.21674	2.59176	3.14687	17.2028	2.4102	20.9925	15.017	2.62428	1.64818	7.17987					0.997603
	14.31	3.46009	1.95966	2.56205	1.28403	3.24689	0.926764	3.97929	1.65664	0.659477	0.638627	0.903944					15.6645	8.81941	1.54942	6.67676	4.1215	1.79655	0.218002	0.55572	2.16482	1.97266	1.46964	5.01731					1.21927	0.633552	2.76646	1.49635	5.51017	14.7835	3.1435	20.8894	14.6367	2.48932	3.71197	9.07884					2.66551
	14.359	3.79421	3.7208	1.12388	1.38616	3.27837	2.37583	4.06314	1.09882	0.609288	1.27358	0.708135					13.6401	8.93169	2.70899	7.26002	5.60394	1.49395	0.0987554	1.97088	4.51388	0.99601	1.1641	5.54857					1.20221	0.431473	2.67987	1.60837	4.83657	12.5785	3.98684	20.4468	13.5561	2.29049	4.79411	13.2524					1.52276
	16.3287	3.94596	6.54428	0.906388	2.50368	3.54595	2.23977	2.81759	0.973227	5.96265	0.236255	1.18039					16.4596	9.2134	4.96763	5.36387	7.17215	1.9706	0.627916	0.639709	2.77438	0.264791	1.22647	5.97804					1.82782	0.713315	3.09705	3.38554	6.41396	11.5647	8.87653	19.8034	15.9196	3.7052	7.92496	19.7649					2.44891
	12.0571	4.51723	13.4501	0.270696	3.13079	5.03998	3.86144	5.54076	1.27055	1.49416	0.771214	2.34682					15.4987	8.66602	7.09511	5.31517	8.88431	4.69198	1.04345	0.575054	5.08147	0.185243	0.972022	8.49813					3.95879	2.0275	2.92548	4.93059	8.22066	13.4711	9.14806	21.4674	15.2526	5.46888	6.4667	20.7051					2.76058
	11.98	4.88841	14.7643	0.431866	4.00436	4.86006	0.746327	3.62872	2.65231	1.54956	1.10717	1.01949					15.5015	8.9112	6.0581	6.23745	7.24502	8.57614	1.14718	1.39823	7.01962	0.0685326	0.707531	10.5577					6.45968	1.70281	6.1399	6.10481	13.8342	8.55047	16.18	18.6203	15.7492	4.17566	8.19176	24.0337					3.31059
	12.1118	4.93673	16.1858	0.809142	6.17351	3.39744	0.864246	2.00672	3.26196	1.89068	1.14541	2.21212					18.5734	9.0015	6.65781	7.01002	5.65104	13.9816	1.76612	1.75987	8.29719	0.112611	0.619013	10.1511					8.41109	1.10186	2.88759	5.63107	12.729	6.1236	19.3201	19.7543	11.037	3.31477	5.48319	23.5581					3.77744
	13.5696	6.22866	19.6009	0.2361	7.17578	2.80587	0.605286	2.81621	4.14303	1.5383	1.8111	1.57507					16.8303	7.6677	6.20959	7.29627	5.36476	19.1544	1.10766	1.58989	10.4229	0.110741	1.34178	10.3112					8.64907	0.790763	3.59712	3.95512	13.642	4.75912	19.3383	18.3973	11.6973	2.02169	6.304	20.5307					4.69221
	11.6901	7.95227	22.6226	0.953544	10.7474	1.29691	3.54973	4.80137	4.83084	2.27842	1.31441	1.84006					14.7714	4.29768	6.28278	8.86698	4.84591	21.9171	0.187471	0.246285	8.44612	0.574959	3.24973	9.3896					6.43782	0.552587	1.77437	2.76988	16.8806	5.6363	17.0667	19.6072	8.68888	2.44633	5.91088	22.9517					4.68757
	9.93706	7.56878	25.2935	0.525945	9.85309	0.34991	0.891114	4.93349	6.13291	0.658459	0.837655	1.2238					14.6615	3.26886	5.98212	10.439	4.39172	23.4969	0.633617	0.330421	9.48163	0.458105	2.40656	10.5206					5.19302	0.627474	2.4364	2.2725	18.3898	4.62317	18.1224	16.9277	5.50634	2.03398	5.11702	26.3824					6.21695
	13.5667	9.3289	24.7263	0.447828	11.1256	0.634341	3.07088	5.27218	9.23695	0.495638	0.892132	0.970659					11.0857	0.997362	5.68845	10.2504	3.00255	22.6814	1.12649	0.33561	6.73865	0.487965	1.48531	7.81292					4.7076	0.615812	1.2635	1.80383	14.6483	4.08865	13.7332	14.0884	3.57997	1.58083	3.71156	26.1537					4.14753
	7.33601	11.2662	20.596	0.659059	11.2985	1.14376	0.675903	3.54669	11.8444	0.165708	0.483083	0.757495					9.53476	0.360294	5.90213	10.9735	1.92544	21.8635	1.03164	0.290171	5.31819	0.356047	0.715413	7.37141					3.53581	0.448626	1.72357	1.59918	13.0036	3.44716	11.6344	10.9335	1.75794	0.770946	3.04847	26.3464					3.58424
	6.51146	10.8948	15.6204	0.461798	10.9181	1.97621	0.834458	2.94478	14.1347	0.60081	0.815563	0.4011					7.71856	0.374222	7.16723	7.98016	1.29511	19.858	0.650159	0.186987	3.62355	0.290846	0.506152	4.36203					5.08383	0.348989	0.499623	1.14209	10.8609	2.88955	11.2313	8.41155	2.36563	0.720954	2.62834	25.7315					2.68553
	0.491023	12.1233	11.2406	0.253699	10.2091	1.71609	0.511012	3.89634	15.4719	0.243637	1.2099	0.322726					8.36783	0.251189	9.82511	5.56419	0.777523	19.5843	1.36309	0.210647	1.3488	0.268094	0.307853	2.58048					2.45939	0.216741	0.501075	0.865046	8.72584	2.55958	7.77995	4.58939	4.75967	0.323278	1.82757	30.4254					1.94881
	1.55695	11.7634	8.18128	0.404392	10.6407	1.13186	0.403499	2.84634	19.4846	3.14501	0.39616	0.431287					4.3877	0.399844	7.65242	4.33722	0.465967	19.0125	1.44905	0.204965	0.94286	0.176721	0.0566786	1.25468					2.09152	0.464807	0.140493	0.479863	8.30397	2.09855	5.76012	3.78988	1.2839	0.120003	1.14732	23.7883					1.55727
	1.5282	8.76516	6.5904	0.286237	10.0993	0.631096	1.4234	1.82959	20.253	1.2019	0.452263	0.822782					3.36525	0.876149	7.18227	3.17585	0.362478	17.8122	0.545645	0.0955148	1.37798	0.0621277	0.126154	1.09179					1.66392	0.342894	0.438487	0.179386	5.45335	1.50576	5.43282	2.33028	3.97796	0.146893	0.633903	25.3169					0.627873
	0.463508	5.08771	5.57604	0.705163	10.7847	0.281401	1.19875	0.990221	21.3312	0.362077	0.814904	0.196923					2.28913	1.26705	6.61847	2.89432	0.602279	16.4327	0.390188	0.0418164	2.36936	0.115218	0.783722	0.780308					1.44924	0.520187	0.371513	0.319789	3.9431	1.09819	5.89547	3.52244	2.24654	0.221413	0.340721	24.0551					0.375653
	1.60488	2.73423	4.67405	0.774654	11.9819	1.07816	0.822376	2.11239	21.6002	0.37049	1.08981	0.133631					1.37935	2.59537	5.2387	2.77514	0.630313	13.5859	0.224916	0.313236	2.78183	0.381021	0.627317	0.751819					2.45179	0.557043	0.363362	0.600485	3.28284	0.865857	5.74814	2.4441	2.13391	0.37744	0.266656	21.5067					0.306487
	0.481127	2.47725	2.99481	0.614415	14.3716	0.200085	0.33947	1.24684	20.8764	0.441539	1.29352	0.0761968					0.733285	2.15873	4.22275	2.13568	0.917657	12.3545	0.302433	0.107697	3.68308	3.84563	0.449694	2.1121					1.92177	0.362132	0.462924	0.34496	3.0356	0.651112	6.5352	3.95916	1.77296	0.309215	0.329526	25.8294					0.23171
	0.418715	0.987099	1.17662	0.244006	14.7284	0.541855	0.199799	0.673756	20.4046	0.658415	1.67216	0.63246					0.48576	2.46041	3.30651	1.98817	0.709352	12.6179	0.103945	0.226723	3.50118	6.51376	0.212919	2.54442					1.95081	0.398519	0.651117	0.323023	2.78174	0.452929	6.4085	3.37261	1.24076	0.271206	0.333536	18.9085					0.515833
	3.31128	0.803653	1.97353	0.435037	17.0358	1.93334	0.186867	0.213874	19.4044	3.2989	1.27395	0.843916					0.490801	3.67294	2.57742	1.75863	0.616798	12.6612	0.6233	0.248391	1.99663	7.10558	0.253457	1.68444					1.85321	0.344761	0.265978	0.250648	2.64495	0.490261	4.33685	2.22404	0.876116	0.234372	0.497218	19.0294					0.664595
	2.08663	1.04634	6.28557	0.383622	15.5345	1.63148	0.263568	2.44988	14.5008	0.967543	1.96736	1.45666					0.562821	6.09965	2.11086	1.62609	0.593638	10.7557	1.24345	0.304051	1.16251	9.07244	0.188413	0.885405					1.6384	0.210125	0.109453	0.243732	2.72934	0.479868	3.59288	3.7179	5.42615	0.223575	0.35072	18.9752					0.725471
	1.64169	0.923236	3.97924	0.366023	19.1951	1.73277	0.540644	3.64732	10.4282	0.48936	2.54656	4.10878					1.17362	8.01306	1.14822	1.74863	0.390333	7.99328	1.74884	0.0513261	0.858711	13.097	0.146918	1.62185					1.61739	0.270914	0.0637527	0.222361	1.98762	0.266548	4.35731	2.71578	3.05171	0.211896	0.343735	16.9352					0.422066
	1.73643	1.52746	9.60182	0.223456	17.2489	2.12077	0.279958	6.95442	6.80533	0.489371	2.37122	3.12378					1.26878	8.99939	1.30017	0.970149	0.986417	6.70439	2.13472	0.0231391	1.27429	13.9179	0.0667001	3.078					1.93227	1.01283	0.0623381	0.20845	1.93034	0.364536	3.25218	2.41779	0.982444	0.267697	0.334799	16.3586					0.661813
	1.15127	1.51287	7.20222	0.43531	18.0132	2.38474	0.241734	6.39341	3.50916	0.632601	0.967366	2.28604					1.01108	8.49011	1.35778	0.704165	1.14813	6.28158	1.84211	0.0695301	2.38657	10.6694	0.0303441	3.91256					1.76024	1.21936	0.0458519	0.137646	1.8826	0.275053	2.70011	2.10622	0.940901	0.11619	0.340801	13.352					0.419392
	2.41019	2.12096	11.4114	0.807693	20.5548	2.9188	0.734591	9.57833	2.05836	1.92067	0.921975	1.79274					0.254943	8.43585	2.78544	1.37896	6.59549	8.8072	9.86512	2.08097	2.30038	12.8858	0.619658	3.66158					4.39785	2.33528	0.544349	3.10772	4.0284	0.425312	0.65009	1.17589	0.393408	0.955654	0.102884	12.2693					0.346636
	0.447587	2.3837	11.4338	2.60545	16.4128	3.32938	1.15651	9.53002	1.99443	1.03693	1.22592	0.744191					0.478028	7.49518	2.06705	0.962161	7.98782	9.80345	12.6251	2.26162	2.78842	13.9028	1.56777	3.67642					3.26178	2.93467	0.324067	4.77462	4.95914	0.793243	1.321	5.74782	2.50251	2.97341	0.543608	11.0553					0.30097
	0.630347	2.22171	19.6009	4.70246	15.991	4.36377	0.820781	8.85933	0.422156	0.217959	0.781574	0.835952					0.559634	9.14274	3.64266	1.4684	9.02806	11.5997	12.3964	4.01731	2.41929	10.5844	2.80343	3.72158					3.16989	4.21086	0.587504	5.47504	5.97522	1.21302	3.7451	4.36163	3.9787	3.04078	0.185575	10.8651					0.33341
	1.135	3.47041	20.3155	4.14214	12.4467	4.8052	0.214841	9.50089	0.189875	1.67621	1.12794	0.370297					2.66761	8.89162	3.2417	1.70883	8.30378	11.4502	10.374	3.755	1.9641	7.17694	1.36279	3.81061					4.55345	5.60323	0.133748	3.7373	5.1318	1.32832	3.40855	5.39449	3.92662	1.52278	0.272118	11.118					0.361104
	2.4164	2.80924	18.5952	3.56058	12.5217	3.45334	0.54059	10.4618	0.977052	1.13552	1.55156	0.404117					3.07622	9.68465	2.76944	2.26948	6.99558	11.0924	9.53438	3.26366	1.33909	3.91749	0.415242	6.07154					3.84826	6.86475	0.880641	3.06141	5.80217	1.98016	7.31934	6.64574	2.25317	1.58913	0.727755	12.2268					0.325323
	2.23478	2.77093	19.642	2.88562	10.1274	3.17471	0.833941	9.76229	0.579591	0.850841	1.09596	0.233847					2.41746	9.73095	2.56797	3.36856	7.01502	10.1253	9.89562	2.38568	0.989607	1.82804	0.48819	6.71551					2.17384	8.7559	0.950217	2.42828	4.25124	2.12074	8.36133	3.23767	1.94894	1.04813	1.11462	12.4869					0.816476
	3.43737	3.39191	21.1371	5.0174	8.88486	2.42349	0.276857	9.61858	1.16796	4.13574	0.9005	2.73413					2.84475	10.274	1.56561	3.13544	5.47679	13.4741	10.7693	1.36704	1.0036	0.45098	1.0554	7.60359					2.18195	9.24546	0.957096	2.71793	4.26119	2.28115	2.71804	3.47607	4.3954	0.413487	1.246	11.4223					2.88903
	4.19666	3.5321	16.6109	8.52447	11.8181	2.99996	0.343739	8.86982	3.44121	2.93792	0.805336	2.0765					3.40824	9.30296	0.601609	1.96568	7.60952	11.5035	7.64975	4.95221	0.672868	2.17772	0.769612	7.24693					2.20047	11.1306	0.495284	2.30922	2.94973	2.12536	6.90159	3.23065	2.63103	0.744672	1.57152	10.369					3.07243
	5.86775	4.36719	16.2702	11.9727	8.36714	6.64142	0.335612	11.7427	6.98111	2.61257	0.846318	2.00755					4.99964	9.95686	0.179235	2.0503	8.76853	7.8735	5.77782	3.00796	0.638168	2.66278	0.565017	8.22503					4.95986	13.0946	0.7567	3.12626	4.77913	2.37477	4.91015	2.56875	1.09341	0.696636	1.6861	10.0082					3.05997
	8.8023	4.91036	15.9281	11.6134	7.56826	2.46592	0.172158	17.3375	9.9582	1.23027	0.796155	1.94199					4.59007	12.1283	0.368277	1.33914	13.1869	6.07249	5.47742	1.02028	0.513429	3.95458	0.267784	9.12649					3.40768	13.8747	0.871343	3.16738	4.36263	2.74546	3.47706	2.56637	2.33236	0.769929	1.51138	3.10209					1.65438
	10.0846	4.29125	16.9782	12.9838	6.98579	3.24956	1.34366	14.0935	13.9814	1.54893	0.816176	0.957402					5.5445	13.171	0.925011	1.25212	16.557	5.09154	6.13249	1.87612	1.1867	4.41304	0.178355	8.45716					3.78094	20.1739	1.06748	3.7074	3.0693	2.08811	2.22947	2.80474	6.07274	1.18759	1.24044	4.30053					3.21234
	7.90161	2.80527	16.6255	14.1514	8.88389	2.82723	3.93891	16.9404	17.4057	1.9694	1.07606	1.44679					5.6129	14.3899	1.26807	1.36303	20.0659	3.74095	7.66547	3.54936	1.5872	3.23526	0.377293	7.60392					5.27325	17.6857	0.648104	2.86237	1.58689	2.16936	1.33234	2.62136	3.38793	1.45015	1.14549	2.72206					1.38073
	7.02436	6.30866	15.5391	16.7107	4.09122	2.58928	4.94331	18.2519	20.9871	0.809384	2.4818	1.25863					6.55571	17.6738	2.44827	1.796	21.8379	3.38317	7.7391	3.44255	2.51481	3.50523	1.12886	6.76227					4.47166	16.5353	0.186576	2.17685	1.7919	2.35913	1.04544	2.99433	2.86408	2.07219	1.00043	0.582918					1.99519
	9.84781	11.1241	14.091	21.8866	1.75379	2.07248	7.73543	19.5325	22.836	1.71555	2.88263	0.575129					9.84039	19.0604	3.17745	1.9127	21.034	3.56556	7.91379	4.08662	2.67834	2.77503	0.840956	5.71477					4.02273	13.1062	1.09804	1.78434	1.61416	2.15253	0.941099	2.37525	3.23957	3.51941	0.746126	1.30751					3.39029
	5.8175	5.48464	15.4849	18.8492	1.64655	1.76241	10.3643	22.6471	21.3034	1.09081	2.93116	0.607963					8.59786	17.3113	4.13446	1.89419	20.8655	5.51023	11.3472	3.77825	2.06758	1.73123	1.28061	3.93581					3.11732	10.7397	2.43844	1.52706	1.41595	2.06472	1.25866	2.72253	3.10887	5.23011	0.440313	2.27223					4.01465
	4.86651	8.35544	17.0476	18.9653	5.45984	2.72731	8.55296	20.0419	18.8148	1.16068	1.74627	0.695882					5.76383	15.6484	4.31736	1.85556	18.4037	6.53108	13.3524	3.68474	2.20203	1.69788	2.10806	3.52316					2.69712	7.11113	2.0688	0.953583	1.36535	1.50438	0.682175	1.9448	2.45335	4.05057	0.316184	2.21008					1.22101
	4.15257	5.4253	19.5325	15.5884	3.74139	2.43509	6.88588	21.7927	17.6687	2.43791	1.15698	0.69252					2.34213	17.9146	3.97449	1.26564	14.7247	10.0821	13.0016	3.10435	1.44824	1.35707	1.33631	3.13376					2.0492	7.19589	3.51272	0.557768	0.932419	1.5603	0.980942	2.03452	2.06472	2.7448	0.181554	2.47365					1.90095
	4.08434	3.50533	18.1006	17.9096	3.4802	2.78205	7.43756	16.2182	16.7141	1.06729	0.488202	0.859172					1.22425	18.0711	2.18845	1.17317	11.972	10.1677	10.9913	3.00071	0.950064	1.56768	1.51084	1.81126					1.74876	8.28682	2.03318	0.386244	0.344005	1.01767	0.497248	2.50885	1.36822	2.07223	0.447442	2.62038					1.69511
	3.50689	5.13642	17.8023	17.3034	3.36128	4.22846	7.92117	21.31	15.1082	1.34599	0.966734	0.202783					0.312773	21.0418	1.88635	0.877871	9.56572	12.09	10.0592	3.70826	0.818895	1.35694	1.76163	1.18751					1.10483	8.91359	1.83619	0.207353	0.565535	1.25232	0.422122	2.29486	0.908716	1.50774	0.202034	2.0136					1.14744
	1.91965	4.67491	17.9496	20.741	3.39788	5.46998	6.93185	16.395	11.8462	1.66516	1.10508	2.3456					1.29225	18.2123	1.24261	0.417793	6.85104	11.8449	10.2829	4.14895	0.472212	1.21399	2.01824	0.305022					0.830607	11.6131	1.52895	0.155792	3.57588	0.711048	0.369059	1.11729	0.704436	1.06716	0.0272013	2.07235					0.273649
	2.49257	3.57045	14.5191	19.9568	3.10694	5.99679	6.89949	18.2275	12.2821	1.48949	1.24471	2.01471					1.66719	16.2015	1.97633	0.0852989	5.13424	12.6038	11.4279	3.36968	0.15727	1.19	1.29852	0.737868					0.685747	14.3829	1.7223	0.261403	3.23885	0.179553	0.716395	1.23232	0.445959	0.831289	0.0555236	1.31715					2.89693
	1.70579	3.27427	14.7823	16.9422	3.96065	9.22042	8.99161	16.9213	9.92596	2.39979	1.91155	1.42876					1.67466	14.7384	0.129335	0.0496043	3.42349	13.6658	9.35009	3.20337	1.56102	0.694931	1.47967	1.77553					0.267815	16.0055	1.75076	0.138754	4.35592	0.201406	0.602999	1.69067	0.253693	0.313296	0.0466703	2.29355					3.1632
	5.96516	2.76461	13.4556	15.6954	4.69415	11.1546	8.22889	14.9765	7.06009	4.56765	2.27779	1.53153					1.41752	14.0096	1.78	0.0124161	2.46718	13.3104	8.66271	3.15974	2.36688	0.432991	1.21939	1.47897					0.233589	20.0283	1.85046	0.181055	4.58873	0.185731	0.347644	1.41464	0.172715	0.174796	0.138755	2.51014					5.047
	3.44307	5.12912	14.8252	15.2416	4.88862	10.2377	10.6458	12.6025	3.90017	3.00828	2.74517	1.75546					3.60918	11.4913	0.574458	0.0612103	1.91046	12.5212	7.57991	3.66976	1.53573	0.47637	0.675395	1.2312					0.306894	17.9753	1.17417	0.219195	4.5515	0.21743	0.447514	0.986475	0.143834	0.040486	0.0676137	3.2724					2.88967
	2.8737	5.61778	12.4859	15.9006	8.6017	9.83748	10.977	12.089	1.94495	2.55961	1.83561	1.51486					2.2081	6.98144	0.637463	0.218356	1.84143	14.3293	5.54533	3.57062	0.972525	0.837114	0.806021	1.20781					0.244822	19.3401	0.69488	0.161954	5.94362	0.136833	0.362329	0.494175	0.32831	0.212699	0.0884352	8.37544					2.3651
	2.49581	6.84558	10.6754	15.1768	9.12189	10.2523	10.9339	9.5393	3.34365	2.41712	1.56344	1.55699					1.53123	4.61256	0.419379	0.280681	2.08218	9.63376	2.94457	2.8417	0.257328	0.468351	0.47988	1.14575					0.289167	16.7638	0.537709	0.215329	8.10231	0.29893	0.420493	0.3338	2.29048	0.387835	0.104916	5.17726					1.84852
	2.46344	8.57004	9.23045	14.4708	11.0972	11.2881	9.95353	8.52159	5.09926	2.28269	1.08427	1.6041					1.62078	2.91566	0.336734	0.226095	1.10523	13.6972	0.626061	3.67351	0.800829	0.399878	0.498555	1.23664					0.206649	17.452	3.14483	0.110583	8.51218	0.182208	0.71792	0.325343	0.791188	0.284714	0.123746	5.71033					2.8321
	2.80909	8.07012	7.57912	13.6624	11.8183	9.94628	9.21996	6.47174	4.53559	2.17895	0.796075	3.0659					1.04047	1.67276	1.45421	0.133981	0.543704	8.10681	0.940643	3.37181	1.05602	0.299506	0.0430495	2.55764					0.194576	15.6273	0.794012	0.148813	8.00454	0.291662	0.439852	0.167565	0.871339	0.265549	0.138898	2.08511					3.11684
	2.2609	8.73559	9.03741	12.9909	12.8997	10.4654	10.3035	5.70919	4.58374	1.79627	0.137277	4.14324					0.985142	1.32897	0.635185	0.135191	0.632555	6.62249	1.80418	3.20293	2.19315	0.939141	0.225438	3.90629					0.29813	14.4893	0.470729	0.0274956	9.10919	0.142363	0.281998	0.411646	0.653932	0.286213	0.120655	5.78553					2.92351
	2.65793	6.0386	7.32015	13.7814	12.5809	11.9744	7.725	4.45916	4.27856	1.37359	0.156896	3.18823					0.61199	0.607624	0.740404	0.23367	1.04942	5.71678	3.39525	3.51769	1.88876	0.401759	0.212384	4.60062					0.0209923	16.0287	2.33694	0.0651842	8.85568	0.0795814	0.275836	0.0716885	0.559696	0.274368	0.0339569	0.403445					3.67055
	2.11548	7.30052	6.00996	13.8894	13.4492	10.4712	5.6643	3.87388	4.21482	2.62613	0.943921	2.82255					0.678936	0.683232	1.18967	0.78554	2.27198	3.88397	10.2282	6.63792	4.77131	3.20337	1.65136	5.81602					0.579849	17.0271	1.12095	0.0799709	10.3938	0.488038	1.08807	0.174866	0.429297	0.846563	0.85657	0.937428					3.33953
	2.52194	8.03561	5.70229	12.3296	13.0625	11.8899	1.64147	3.07136	3.47213	3.38818	1.08022	2.18953					0.46317	0.652309	1.04208	1.18772	1.30587	3.51281	13.3302	7.71621	2.70804	4.19519	2.41384	5.26425					0.389976	17.0896	1.41335	0.622549	10.363	0.364369	4.41749	0.618015	0.290792	2.21849	3.78325	3.0474					3.87653
	1.94602	10.5287	3.04093	11.8695	13.5078	8.61796	1.58635	2.03991	2.62539	2.91021	1.16507	1.99327					0.997514	0.989747	1.29625	1.52381	1.96896	3.0821	14.643	5.49855	2.47219	5.26796	1.30554	4.71948					0.393512	16.94	0.519257	1.51424	9.79325	0.531994	8.24535	0.402201	0.371786	3.1804	2.42458	5.49363					5.22898
	2.01248	12.2527	2.51201	12.6497	14.207	8.56657	2.24133	2.14024	2.91344	2.15031	1.46483	0.213166					1.46556	1.61543	0.316496	2.52691	4.77392	3.2382	14.9755	4.60693	1.47185	2.13874	0.958194	5.92058					0.0531167	16.1656	1.11073	2.19191	11.5534	0.43252	7.79297	0.768637	0.254728	2.88762	1.58455	3.64033					7.94561
	2.08837	13.8718	2.17825	13.6795	14.4252	5.67302	3.44914	1.9404	2.45713	1.53105	0.702186	0.234015					2.48988	1.96848	0.362182	2.78872	7.04942	3.86235	13.7067	4.41393	1.2065	2.11082	1.04603	5.92931					0.0357899	16.2935	1.0824	1.50616	14.7343	1.06199	10.6974	0.207905	0.651539	3.64182	0.576805	3.48956					10.9637
	2.30532	14.8358	1.98817	14.3972	16.4504	5.41202	3.74652	1.14447	1.45849	1.24232	0.224002	0.172974					5.46657	2.56997	0.0661879	3.14877	11.7495	4.99945	12.5961	5.0827	0.996059	2.67299	0.836988	4.92183					0.147385	14.5215	2.55185	1.32263	19.8252	1.14355	11.6181	0.526	1.34289	4.36518	0.899169	3.76516					17.2923
	2.53849	18.6351	1.61742	14.8545	17.0536	6.32323	2.04308	0.8165	0.966179	1.38097	2.81509	0.24795					4.89824	6.18945	0.562869	3.61209	14.506	7.59484	12.4169	5.28453	0.545712	2.3808	0.539218	2.95247					0.0147522	15.3447	2.99219	0.968555	23.3226	1.53177	10.618	0.162645	3.28091	4.99491	0.924216	1.80358					28.8939
	3.42007	21.7881	0.578877	15.3403	17.1667	8.56161	1.86876	0.786772	0.574376	0.508792	0.500721	0.260753					6.76919	4.90868	0.657416	3.67231	16.6904	6.23981	13.698	5.61354	0.360007	2.72678	0.821211	0.989968					0.405302	18.059	2.52155	1.25612	30.3296	2.56448	8.90609	0.380872	3.23614	4.972	0.972883	2.38933					38.6891
	2.95851	22.0154	0.310344	12.2641	17.167	7.60794	3.7241	0.807344	3.29111	0.682298	2.07173	0.238262					10.0912	8.51628	0.95503	2.52413	15.7945	8.82217	13.2689	6.88199	0.1747	2.93706	0.399544	3.44897					0.3388	18.0189	1.96519	1.92252	34.6234	2.06616	8.82474	0.447811	2.71826	3.91717	0.987854	3.21509					48.4232
	2.5739	23.6152	0.44501	13.2454	14.5046	9.4791	3.66821	0.773245	2.6772	0.333337	1.87943	0.484431					8.51439	7.47157	1.14844	2.19851	15.5312	8.7533	14.2844	8.31858	0.256112	3.90779	0.773861	1.15639					0.309276	21.1489	3.95974	2.25198	36.2266	2.66695	7.88717	0.528933	4.22003	4.7009	0.611745	4.00463					52.0512
	2.24018	22.698	0.600045	11.7649	13.0155	8.89473	2.46489	0.725215	2.49901	1.58031	1.58034	0.211672					13.0878	7.50171	1.00186	1.45069	14.9124	8.93989	16.3486	9.58253	0.593706	4.1518	0.39441	1.64763					0.373158	21.0998	3.30486	2.04274	39.8148	2.83462	10.264	0.823942	6.90771	4.17225	1.25204	6.48891					45.2407
	1.91383	23.0113	0.555219	13.9572	11.1041	6.88373	4.42208	0.20861	1.9234	1.35902	0.40719	0.0974993					10.4702	7.7492	1.44021	1.21192	13.5168	5.81863	15.7906	8.66233	0.469679	4.21743	1.03128	3.0244					0.241974	20.4126	2.68684	2.46298	44.798	3.06122	8.08588	1.56242	7.45557	2.74233	2.40185	5.25734					38.7655
	1.73403	22.8151	0.315581	11.8215	9.34637	7.20706	4.29693	1.23246	0.481771	1.10989	1.37931	0.390812					9.63999	8.32108	1.57295	1.3303	12.5599	4.1202	19.2012	8.50793	0.706963	3.82458	2.67067	4.89118					0.191486	15.6367	4.72784	2.80735	48.0141	3.73286	8.73204	1.38003	7.18054	2.15171	4.12648	6.3887					33.9543
	1.22757	22.8316	0.578009	14.1745	7.00264	7.15159	3.06774	4.52524	3.79278	2.13402	4.0143	1.01279					9.55259	9.29009	3.17818	3.68108	8.08519	3.18547	19.9918	10.3957	0.426877	4.97032	2.93576	8.24805					0.19865	12.4264	3.81072	2.86748	43.7825	4.50622	8.92472	1.49098	8.34561	2.2105	3.11562	5.22483					30.4871
	0.915844	24.2804	0.522246	12.4979	4.8382	7.88952	0.873001	2.05092	3.67874	2.45532	5.55781	2.74169					12.2133	10.6138	2.97886	6.6917	7.78371	1.78128	20.842	9.56858	0.800972	6.26309	2.64808	11.4167					0.373011	11.0785	2.915	2.86357	42.6328	5.52905	13.0224	1.89514	10.6697	1.55478	1.49087	4.79402					21.4801
	1.17723	21.6249	1.22233	11.1821	2.50876	7.47779	4.18499	2.83936	6.30711	1.29105	7.24507	3.84177					8.71454	10.969	3.14701	6.50986	5.24968	1.5717	18.4856	11.0704	1.51332	6.15142	2.198	12.8239					0.43179	8.92679	2.62876	2.6704	41.6858	5.32515	7.40236	1.29006	11.4213	0.490199	1.68234	4.20483					20.731
	2.003	21.4542	1.36413	9.34966	1.83919	8.86412	1.23968	3.04235	6.80486	0.0997064	8.03517	4.16519					7.04298	9.90945	1.19588	8.04074	2.94708	2.26024	18.3417	10.0676	1.01677	4.94779	1.31952	13.3422					0.478284	5.92833	2.42617	1.68727	38.984	4.3143	8.07824	1.32763	11.5614	0.345239	1.48318	3.57696					18.8377
	3.01341	19.0313	0.377472	6.50134	1.20401	7.3255	0.987582	2.40965	9.58802	0.673384	7.43168	3.39053					5.14625	9.9962	1.39946	7.21714	1.58506	3.6618	18.1656	11.3133	0.768494	4.0991	0.669701	12.8493					0.153559	3.6969	1.38084	1.40783	36.5304	5.09953	5.96836	0.967838	12.1411	0.207327	1.33639	2.74213					18.4281
	3.88773	19.9208	0.672316	4.58827	0.669702	7.0231	1.00346	2.15264	10.2601	1.07506	6.74632	1.73777					3.76638	8.52096	1.2078	6.13692	0.727329	1.61384	14.1257	12.0356	0.559163	4.43943	0.236552	9.67219					0.0952311	2.38184	1.0219	1.11984	34.1557	4.29005	4.77517	0.809905	12.884	0.393185	1.19973	1.61962					16.2805
	5.11262	20.5851	1.19207	3.03007	0.858195	8.03991	1.43398	3.04177	10.9248	1.87421	5.30339	1.13221					2.3576	7.38247	0.99499	4.91089	0.118104	2.37392	14.5062	14.6489	0.490052	4.70516	0.267704	9.78349					0.104467	1.00376	0.634294	0.616464	29.2787	4.32304	3.37956	0.58675	11.2773	0.411343	0.952909	1.44388					19.4713
	4.94438	19.4483	2.34347	1.78566	0.410429	5.6217	0.886717	2.32421	8.0545	6.45434	4.37977	1.13504					0.884751	8.43615	0.76305	3.81438	0.64027	2.49112	15.5587	14.5084	0.360655	4.3348	0.0965813	6.22354					0.0492373	0.196711	0.336212	0.402327	23.8351	3.04205	2.49526	0.332038	12.4836	0.23165	0.71452	0.458793					13.2304
	7.23228	19.6453	5.17835	1.09272	0.926962	4.10582	1.8685	1.64084	7.63875	8.7004	4.28068	0.151229					0.344523	6.96441	1.29004	3.67218	0.966602	3.4926	13.2478	13.8031	0.0489692	4.71875	0.0998912	2.79574					0.0315676	0.515021	0.0808146	0.199512	20.4918	2.21014	2.05517	0.243739	10.3898	0.225877	0.750367	0.45594					11.0184
	6.09982	19.8851	7.00848	0.362786	1.71774	2.50122	3.2088	1.63882	9.77558	10.7793	3.70571	1.30612					0.589895	7.24945	2.56775	1.869	1.00248	3.6918	12.7473	13.4748	0.335461	5.23272	0.149181	1.10919					0.262426	0.265864	0.18862	0.182695	20.2637	1.45385	1.20942	0.159978	13.0836	0.154376	0.488788	0.174479					12.0671
	7.642	15.1599	9.17207	0.153513	1.79555	1.96234	3.31554	1.28456	8.98114	11.2366	4.14287	4.06937					0.517546	6.20591	2.21159	1.10191	1.95953	3.58979	10.807	12.4981	0.206677	4.81473	0.212774	2.98429					0.0874767	0.576162	0.292739	0.0845841	15.5091	0.929099	0.753046	0.0606968	13.8037	0.321868	0.364394	0.245219					10.0316
	6.69614	12.5441	8.37724	0.733744	1.90418	1.79119	5.67365	1.30341	10.8283	9.89273	4.6254	5.5894					0.273333	6.54062	1.40786	0.573756	0.201493	3.13065	12.8485	12.8998	0.403629	4.60557	0.169799	4.74679					0.559211	1.40189	0.241351	0.242399	16.3395	0.46015	0.165362	0.120007	13.5137	0.170305	0.101969	0.646792					12.4829
	6.01564	12.7191	11.4123	0.56486	2.04453	1.3083	5.40516	1.52146	10.9865	10.9715	4.03145	3.99816					1.76617	5.80031	1.31165	0.244282	0.741976	2.73046	9.076	12.0037	0.282127	5.74511	0.120605	5.23801					0.305364	1.22215	0.315067	0.243359	19.3171	0.17638	0.613016	0.126673	15.6601	0.0629227	0.0986427	1.3706					9.70364
	4.47435	8.97829	13.9527	0.338419	2.65246	1.27047	7.41465	2.24415	9.44353	10.4988	2.66939	3.50399					3.11249	6.343	1.97014	0.0840637	1.68059	3.1642	10.1998	9.65814	1.22805	5.00118	0.177217	5.77205					0.199683	0.942223	0.290399	0.163584	13.8708	0.378353	0.777538	0.134335	13.6105	0.0502349	0.129964	2.13464					11.2163
	3.60176	5.80366	14.6155	0.686081	2.76874	1.08117	8.16427	2.3346	10.45	11.5424	4.01816	2.66275					3.81398	6.28929	2.61024	0.361878	0.740522	2.39133	11.0972	6.43117	1.36727	3.77219	0.190839	5.73207					0.234826	0.505857	0.245208	0.221227	10.2182	0.324204	0.957354	0.1059	14.3176	0.0538092	0.144758	4.10114					9.0885
	4.90521	4.99784	16.8165	0.689198	2.11111	1.14031	12.3747	2.4921	9.86576	8.25714	1.21763	2.30839					5.02397	6.27558	3.38838	0.392326	0.394666	2.72225	9.91129	4.50854	3.29789	3.11657	0.194914	4.8323					0.195341	3.1838	0.218909	0.192583	7.12585	0.451577	0.702164	0.173317	12.7849	0.162431	0.0990325	5.63051					12.8925
	7.21058	6.19499	18.1556	0.618555	2.45004	1.16194	10.7503	2.41069	10.7586	7.3258	1.95646	1.20542					10.4539	3.84984	4.80789	0.497242	0.189027	1.52062	8.57425	2.81973	3.04003	3.1605	0.18477	3.7493					0.0708016	0.370375	0.167522	0.161786	6.73581	0.756383	3.40832	0.105217	14.8825	0.111019	0.215153	12.5866					9.05455
	5.73674	6.20075	14.5844	0.623775	6.04007	0.945607	6.91583	1.23751	11.1581	8.62757	2.32842	0.368302					7.22543	4.83854	5.97078	0.643053	2.48469	1.33305	10.2337	2.65528	3.58778	6.20745	0.198253	1.93649					0.0463683	0.346687	0.0866658	0.689504	4.71454	0.93288	2.00656	0.0983843	17.9503	0.180625	0.287432	10.6376					6.50233
	10.2383	2.752	13.7068	0.854308	4.8233	0.866959	5.88963	0.836737	10.1524	5.99114	2.26395	2.75944					7.64073	3.4057	8.16967	1.38914	2.62509	0.79083	6.65968	1.43297	4.43189	10.3867	1.88577	0.390897					0.476224	1.20559	0.569405	1.98298	3.63533	2.02655	5.46019	0.18226	22.2597	0.756023	0.959164	11.5687					7.27349
	9.23339	1.67161	11.038	0.90697	3.60824	0.26289	3.43518	1.09221	11.2296	3.75732	2.23885	1.34357					7.53383	3.66365	7.49494	1.05291	2.88357	1.24088	6.11415	0.453362	4.08677	10.5547	0.571419	1.70443					0.487905	2.80174	0.528848	3.04584	3.12143	2.46325	6.76289	0.554471	21.7746	0.989477	1.14405	13.6222					6.63514
	11.6105	1.21231	7.54841	1.37072	2.50601	0.539039	4.32353	2.63197	11.0378	1.12283	1.64924	2.0319					7.76074	5.03091	7.77929	2.5565	2.3409	3.59251	3.85636	0.439474	2.98236	11.1251	0.566531	2.71684					0.307606	5.00249	2.33723	2.79717	7.1972	1.65216	8.08748	0.880065	21.0323	0.773945	1.02256	11.22					6.43478
	9.89867	1.39302	8.6092	1.54646	4.44034	0.722673	2.61234	2.63105	5.07087	2.31995	1.68496	3.13168					4.90597	6.18783	9.65063	1.13977	2.8526	5.1647	3.05741	0.967208	2.20732	15.1384	1.56984	2.37385					0.436199	5.37658	0.853126	2.08503	7.61573	2.14926	9.52757	0.612867	20.606	0.725509	1.15204	5.38775					9.12862
	12.9757	1.21188	4.98195	1.88305	2.53481	0.778205	2.98502	4.4216	5.41284	3.27988	1.54622	4.24151					2.51744	9.45914	8.28955	2.91876	2.36301	5.68184	2.44979	0.794102	2.18255	14.0641	1.35899	2.10959					0.243981	6.25617	0.899562	2.11098	9.92083	1.48322	10.1526	0.440765	19.1279	1.22952	1.3355	5.11079					8.85802
	11.1026	0.901456	3.97737	2.94691	1.84677	1.52851	2.80282	4.83126	2.30562	2.46667	0.634483	4.0936					1.84248	9.82927	9.81433	3.74289	2.37328	4.45185	2.33606	1.13586	3.55686	13.1763	1.23713	1.44871					0.266455	5.67107	1.68496	2.21411	10.9115	1.1261	18.9309	0.625614	19.4989	1.11692	1.72426	2.49278					18.7643
	12.4424	3.86316	6.4573	5.71795	2.43059	2.39028	3.75035	4.78496	2.01058	0.413428	0.857609	6.05464					0.488105	10.8757	9.86527	3.10987	4.05827	4.5615	2.14093	2.85069	6.40306	11.8812	2.02324	0.822973					0.309712	5.98849	1.58913	1.13655	12.2107	1.60338	13.5818	1.18567	19.605	0.521179	2.42729	1.40143					12.2856
	9.94386	1.67253	3.15588	6.912	2.44911	3.14852	3.55648	6.0045	3.00766	3.57704	1.01537	7.52428					5.219	10.9951	10.0009	6.85921	3.20814	2.96137	1.64072	2.92152	6.44839	11.3652	3.61298	2.17393					0.371988	6.18916	1.42539	0.626539	10.1609	2.37463	15.3859	1.1663	18.0173	1.27807	3.34027	1.24722					8.92817
	8.85365	2.54766	5.21113	10.8574	3.51169	3.50736	2.65661	4.25237	2.10551	6.64523	1.74007	11.0701					3.33106	9.24512	9.24307	7.56112	3.08211	5.10913	1.28261	5.12782	6.24701	12.9444	6.171	2.80905					0.790485	5.50546	1.6274	1.28819	11.4306	3.21239	11.6507	1.0781	17.0274	2.89484	3.66002	1.95399					7.81231
	11.4516	3.60804	3.11302	11.3246	3.53056	2.99547	4.23516	2.68295	1.95297	6.65486	1.84699	11.9793					2.99922	8.72262	13.436	11.8475	3.96381	7.09237	2.92803	5.89077	7.81417	14.569	9.44429	4.04149					2.86263	4.40494	1.32939	1.86286	12.7944	3.25507	10.6351	1.31804	17.7643	2.81772	5.98822	3.06685					7.53378
	10.1031	2.08961	2.39628	12.8992	3.11061	4.7414	7.4549	0.514901	3.49217	7.274	1.50191	18.2623					2.69265	8.65266	15.4241	10.7059	3.81637	6.76459	4.02726	6.31378	5.83077	17.5744	11.1646	4.77298					4.6759	3.6846	1.13787	1.43317	10.8966	4.63874	9.96647	1.38673	14.7794	3.07663	4.17366	2.24034					6.27611
	13.6487	2.75184	2.58409	8.85841	2.83205	3.72021	10.6947	0.314667	2.55007	8.48717	1.08279	17.1926					2.80769	5.83457	9.67568	14.9067	2.84342	8.68875	4.88171	5.11102	5.12215	17.1624	13.6803	7.57635					6.61534	3.70808	1.20062	1.88297	7.73885	5.25975	10.1568	1.61644	16.914	3.17789	4.83238	2.03503					3.96509
	14.6745	2.5902	2.54678	7.70887	4.54769	4.29042	12.2321	2.48617	2.3667	10.8045	1.26399	17.4442					2.53466	5.21742	20.338	13.7597	2.31122	7.77491	5.43926	5.22923	3.50944	16.6441	15.7698	9.47386					4.79161	2.81192	0.814924	2.15773	7.19143	7.9347	13.5216	1.43291	15.8658	3.11819	7.71864	2.00204					3.47052
	14.7282	3.39006	2.82656	8.10409	1.48469	4.58678	15.3529	3.88888	3.03817	9.63213	0.706868	20.1109					4.13347	4.53711	14.1246	16.1166	3.57191	5.55212	4.6189	4.43728	3.12563	16.2373	16.3816	10.1702					4.17618	4.36023	0.480585	1.96603	6.10363	8.59754	9.36455	0.908954	14.5189	2.44955	5.28983	1.43191					2.81908
	15.2956	2.44754	2.92964	6.2617	1.71944	6.68601	12.8584	2.71274	11.4536	8.56132	0.887141	21.2191					3.53876	2.54737	12.8432	18.6795	3.31265	4.01788	3.89619	3.33031	2.54243	17.5304	14.9568	11.5786					4.1883	3.19684	0.379478	1.35564	4.00993	10.1991	7.49419	0.708799	16.9697	1.84003	4.45537	1.09105					1.45913
	15.8268	2.70104	5.03455	6.20162	1.24557	9.52743	16.6782	3.60872	8.05671	7.09812	0.642783	20.9194					4.53399	1.91556	11.6056	16.1579	2.04848	3.05756	3.58895	2.59898	2.47586	18.1338	13.6489	12.5554					3.13068	2.17684	0.149898	1.23663	2.65371	13.7612	6.44274	0.62623	17.9975	1.37625	3.4622	1.43734					1.13713
	14.2665	3.37823	7.39748	4.7083	0.75584	11.0328	16.6787	4.22725	6.12896	5.15576	0.720823	17.5677					3.8442	0.671366	9.90662	14.7425	1.54819	2.46201	3.31181	1.99809	2.53431	15.3581	10.2364	12.4898					2.03351	1.8985	0.10266	0.928685	1.37947	13.9137	5.17307	0.363412	17.931	0.822847	2.80125	0.838897					0.955294
	11.8762	4.57605	8.79362	1.77841	0.432506	11.5889	17.363	4.16554	3.47742	4.30711	1.02906	14.5351					4.3292	1.19419	6.7549	17.3226	1.03223	1.47693	3.51468	2.10887	2.10063	16.0136	8.6204	13.2102					1.51402	1.84453	0.100557	0.70345	0.543491	11.9436	4.09354	0.274244	16.0716	0.502476	4.2597	0.841111					1.05963
	10.1342	3.66786	9.17231	1.3611	0.220682	13.8363	16.6306	5.31478	1.33734	2.96722	0.546438	8.76368					3.0864	0.921422	5.55235	13.5941	0.507041	1.03038	4.01865	0.803877	1.33809	15.3079	6.73998	10.5962					0.988466	6.37967	0.047336	0.458281	0.900779	8.88366	3.59786	0.138496	16.8536	0.403324	6.33582	0.952675					1.2812
	13.4504	3.38114	10.3044	0.661485	1.27526	14.2603	15.9518	6.20731	2.34307	1.35552	0.812466	6.098					2.31675	0.890824	3.92982	14.4852	0.375135	0.685633	4.75153	0.471812	1.06469	12.6945	5.83855	7.24768					0.440247	1.90504	0.0832744	0.321755	1.44621	7.82959	5.2149	0.127162	16.6847	0.229844	5.95386	0.82083					0.892344
	12.2971	3.67787	9.38717	0.117287	0.868259	14.1844	16.6421	5.44097	2.73013	0.629179	0.380638	4.59002					5.77818	0.694539	2.05087	12.3031	0.177603	0.364389	8.26597	0.159421	1.06409	8.79375	5.24333	4.62051					0.3044	0.775368	0.139045	0.143376	1.76977	5.65068	3.85455	0.102818	11.8044	0.12634	11.0005	0.504925					0.443873
	10.318	2.66315	9.68772	0.602599	0.186035	13.0749	16.1939	4.38122	3.5068	0.251372	0.835306	2.41749					3.26691	0.895603	1.27831	9.85757	0.230609	0.286382	6.96598	0.215047	1.42151	7.12206	3.96329	3.78736					0.21632	0.387205	0.0850634	0.0829635	2.34932	3.74146	4.36775	0.110687	10.4268	0.200403	9.0823	0.774333					0.434101
	8.83094	1.60802	7.21831	2.02228	0.260791	12.5102	15.4441	3.65978	1.93209	1.65093	0.432515	1.28871					2.43114	0.556983	0.450757	8.23847	0.279317	0.163689	7.13156	0.136459	1.06043	5.16213	3.64466	3.14423					0.400556	0.446718	0.0802041	0.116915	2.51065	2.89578	3.88175	0.103266	9.47913	0.197665	9.85951	0.385313					0.417756
	7.55542	3.85604	6.61239	0.809317	0.285095	14.8869	14.5887	2.97472	2.28672	1.52794	0.262715	0.69405					2.43138	0.276457	0.582893	5.6323	0.228257	0.516831	8.21234	0.296336	1.86769	3.85197	4.80003	2.60765					0.469874	0.95173	0.0103489	0.0711985	2.0126	1.40852	7.00693	0.0125415	5.33335	0.191255	9.00676	0.419897					0.46332
	7.4798	2.17018	3.76303	0.833049	0.481171	16.1107	14.748	1.85337	3.02596	1.08188	0.459842	0.377544					1.27419	0.373089	1.96546	3.90456	0.275	1.0711	10.7123	0.306923	1.33463	3.37462	6.16602	1.61029					0.574779	1.82801	0.0523018	0.0598787	1.93953	0.37474	4.52418	0.0627061	6.74161	0.220169	8.22288	0.391577					0.396671
	9.09972	0.514761	3.75763	0.946961	0.505497	16.195	17.2746	1.35595	2.3357	1.62321	0.0776353	1.52373					1.04675	0.175782	3.61537	1.85902	0.281271	1.55634	5.46791	0.316694	0.949748	2.00844	4.74246	1.15417					0.34876	2.59854	0.0170945	0.0818353	2.09537	0.481885	10.6861	0.0830639	4.80647	0.196919	7.33138	0.328406					0.279615
	10.8279	2.80334	1.98794	1.18236	0.262095	16.3339	15.2359	2.52308	0.851391	2.02541	0.142878	1.53251					0.647691	0.199847	2.65088	1.54096	0.240231	1.87996	3.68428	0.319132	0.823941	1.20409	5.05348	1.89729					0.417373	1.50892	0.0305343	0.194622	1.62823	1.25345	6.86794	0.0330469	3.02252	0.131628	8.94179	0.237729					0.568194
	11.8632	2.11066	1.71941	0.943256	0.586549	15.8912	13.2816	0.867195	1.25563	3.89825	0.174203	2.27004					1.01797	0.256126	1.97696	4.67182	0.17825	2.55645	2.92597	0.118954	1.56535	0.986287	5.99803	2.85709					0.84448	0.649737	0.0351113	0.221659	1.20464	0.481651	5.88676	0.093372	1.98669	0.405448	4.6281	0.0804177					0.40557
	11.1626	2.1813	0.480605	1.13118	0.419102	17.6284	17.8819	1.37558	0.378934	4.61495	0.138238	3.17853					1.50421	0.157474	2.06579	3.85501	0.170456	2.42753	1.59099	0.324663	1.71268	2.59589	5.36112	5.06091					0.334292	0.244653	0.0412899	0.129633	0.823586	1.09562	4.42958	0.0626903	2.63988	0.164316	4.09717	0.267694					0.347589
	11.8091	2.4052	0.303275	1.54716	0.988232	19.6922	17.3372	1.3004	1.08838	7.54382	0.10173	3.85352					1.91137	0.928336	1.20077	3.44754	0.330476	2.59154	0.584964	0.50528	3.76491	2.96037	3.3217	6.33739					0.708581	2.06936	0.154952	0.232511	0.656842	3.27596	5.15352	0.140935	0.820962	0.178278	1.46753	0.68248					0.353246
	12.4038	3.03962	1.8401	1.32508	1.72718	21.9472	16.9062	2.26313	0.636148	10.9324	0.350168	3.76128					2.74639	0.610899	0.3783	3.61385	0.4839	2.41375	4.9154	0.927171	4.76231	3.56804	2.70776	7.02604					0.284174	0.772724	0.292093	0.862211	2.03995	0.861134	7.53179	0.278987	0.583992	0.654443	1.74194	1.71041					0.465348
	14.2678	3.32709	2.28447	0.95571	0.756911	22.4227	19.3104	3.62494	0.795686	12.6125	2.82261	5.45066					1.90021	0.469582	1.16338	6.22866	1.85299	2.0836	4.88679	0.779174	4.86868	4.79457	2.5173	3.39442					0.880214	1.3364	1.02471	1.57493	3.29351	1.3155	7.53558	0.541679	1.36544	0.432341	2.30253	2.65481					0.41851
	16.8121	2.50508	3.01477	0.643626	2.99042	21.5869	20.908	3.56385	1.13891	18.1428	4.0843	8.99875					1.7407	0.645263	2.78917	3.95907	0.811532	2.03887	3.53916	1.14111	3.6745	3.76484	4.26098	2.15549					0.404825	1.09733	2.49403	2.04183	6.07078	2.03279	7.02039	0.442901	1.91304	0.0883239	3.69183	1.56185					0.609127
	15.3474	1.90962	4.19522	0.908384	7.01133	20.2742	17.5862	2.37659	0.943555	16.4386	4.18264	10.7995					1.78244	0.573434	2.46465	4.1792	0.833308	1.5943	3.01229	1.65116	5.23489	3.84624	3.52944	3.0497					0.21453	0.971063	2.51225	1.53024	9.82428	1.51367	7.21955	1.27598	3.59212	0.353955	5.38275	2.3127					0.479724
	16.4807	1.87974	5.02682	1.07817	5.7139	17.2964	19.831	1.63025	0.771199	18.6303	3.20725	14.4278					2.45282	1.38223	2.18336	4.37726	0.815247	2.22381	3.72564	1.27945	2.48307	3.9215	4.34888	6.18521					0.361919	0.820765	2.64253	2.03696	14.5334	1.48152	6.45187	1.96269	7.33039	0.580374	7.29581	2.62198					0.530094
	16.2645	1.46063	2.95132	1.00348	7.57113	13.6217	16.5158	1.53901	1.51235	16.2624	2.86523	18.3871					4.85361	0.290706	0.961689	5.00482	0.670526	4.722	4.54856	1.18334	2.18613	2.47628	5.98547	2.84841					0.635744	0.967835	1.75896	2.09303	15.4493	1.0232	5.56167	1.8226	9.46471	0.291745	8.7231	3.52426					0.306855
	15.4921	0.792545	6.20254	0.959524	5.6425	10.6719	18.8834	1.25646	0.814065	15.6996	5.7429	23.1014					4.88524	1.1566	0.415629	4.72674	0.430402	9.02492	5.57915	1.21092	1.25946	1.66465	6.1406	5.92889					0.248505	0.530686	1.23818	1.21909	14.9666	0.650934	5.37688	2.25688	7.10703	0.668193	13.4822	2.66698					0.366618
	16.6052	0.479463	5.21153	0.750759	8.54943	6.33558	15.5499	2.01569	0.871177	19.9951	6.8109	24.1426					6.91478	0.157004	0.263696	5.78272	0.301815	13.4862	5.74021	1.01767	1.94872	1.39596	8.74345	6.03293					0.452346	0.49266	0.942324	1.5784	24.3928	1.72762	4.05479	1.84515	6.4802	0.571007	19.1224	2.23637					0.30087
	14.866	1.37312	10.2101	0.583836	7.50927	3.87552	18.7945	4.59461	0.897945	20.6008	7.95124	24.7798					6.81208	0.487025	0.634608	5.52148	0.425682	20.3388	5.41234	1.20843	1.85675	0.883478	9.21607	6.11049					0.802381	0.626774	1.56577	1.39482	25.9728	1.83804	4.63789	0.652178	9.23178	0.296909	23.9073	1.47866					0.405802
	16.8924	2.35086	5.3754	0.39052	9.86755	2.37633	19.7164	5.64268	1.29674	19.2443	8.9366	26.8795					8.13694	1.52082	0.974042	3.78302	0.416836	26.901	4.45698	1.45964	2.48917	1.06546	10.312	4.90248					1.21207	0.243344	1.7094	1.18705	24.7797	1.61095	4.34935	1.03028	5.60772	0.161099	25.4616	1.35917					0.259988
	15.9619	5.36478	5.19849	0.669257	8.32417	1.36188	15.5612	6.42418	1.74879	22.8479	10.304	28.7554					9.37708	0.402084	0.755293	3.74266	0.275582	29.7026	3.254	1.45863	2.50947	0.981036	8.32501	4.19635					1.6198	0.641741	1.70629	1.21358	24.0554	2.54186	4.78212	0.609932	4.11662	0.081909	25.5213	1.04421					0.0881672
	13.6943	3.48023	9.30057	0.920051	7.1301	0.625638	17.3929	11.618	5.97438	24.5167	10.2203	29.327					10.8287	0.321935	1.23759	3.17282	0.248893	28.3377	2.34692	1.80677	2.78325	0.645734	6.93154	5.94705					1.56948	1.42252	3.63323	0.868631	17.0064	1.89298	6.38393	0.283064	3.39596	0.13482	24.2055	1.64841					0.122377
	12.6805	6.60637	5.5984	1.64903	6.34059	0.659547	17.7925	14.9454	5.86315	28.4412	13.5812	27.6532					11.5231	0.339429	0.571559	7.82864	0.141029	23.914	1.25699	1.38131	3.13338	0.638012	5.17264	7.05781					1.42523	0.74608	2.56642	0.791565	15.4698	0.899278	7.99914	0.103996	2.79285	0.255572	21.384	1.10637					0.133389
	10.6833	7.24518	3.52643	1.78833	8.92491	0.558775	16.7928	16.2308	4.36568	27.4469	14.2912	24.4176					11.2307	0.0723101	0.535755	4.83899	0.183018	24.8289	1.15288	1.06228	3.07756	0.41091	3.40667	4.99722					2.31984	0.576404	2.57104	0.760206	15.6164	0.524853	8.73954	0.160749	1.63535	0.142106	18.8645	1.43334					0.0613959
	12.5036	8.71931	7.17665	1.84024	7.0797	0.57566	13.1561	15.0408	5.33764	30.5105	15.1861	24.9712					10.1133	0.321728	0.550197	5.06754	0.20983	26.6697	0.414457	0.852438	2.08472	0.778746	1.62435	5.51809					1.41795	0.390553	2.42832	0.734339	12.4652	0.429411	9.15482	0.133764	1.78606	0.222464	14.8496	1.20249					0.0796064
	9.90566	6.10303	10.0965	1.8791	6.49712	0.670674	11.0781	14.5727	3.61426	28.1968	16.7518	23.5924					9.01601	0.186954	0.453537	4.74019	0.0940131	26.3578	0.494629	0.65344	1.71657	0.649258	0.472842	4.55925					0.975173	0.277711	1.55555	0.455542	9.60498	0.155687	8.51785	0.0733601	1.48116	0.266387	11.6019	0.614711					0.103134
	8.04319	5.31208	6.76453	2.03343	9.03192	0.174647	14.4937	14.8367	2.6124	29.3822	15.2287	24.3948					8.94252	0.131029	0.309339	4.14138	0.046821	25.255	0.596644	0.55744	1.23224	0.471827	0.43175	4.6637					0.726041	0.208841	0.972137	0.311451	8.14477	0.249544	7.44581	0.059409	1.18459	0.0516869	9.35172	0.535798					0.0340442
	6.94046	4.27826	6.08798	3.23239	6.72884	0.689297	8.61932	14.4001	3.9173	28.4004	15.0052	20.8345					9.1206	0.932171	0.346204	4.10124	0.140844	22.1599	0.716226	0.618028	1.50173	0.453941	0.17017	3.72491					0.542495	0.468218	0.870826	0.139458	5.97752	0.0118875	9.85578	0.133192	1.02945	0.0275675	6.71176	0.31378					0.112155
	7.69998	3.5874	7.83716	2.77262	7.73212	1.25759	7.66174	14.659	2.5144	30.2971	14.0244	20.3625					9.06208	1.20826	0.219411	3.37176	0.0541639	18.6725	0.729583	0.663904	0.98592	0.27465	0.474694	3.04204					0.348244	0.236869	0.438614	0.115349	3.74395	0.140317	10.8648	0.100462	0.650573	0.0942064	4.64764	0.267973					0.164542
	5.60602	2.83382	6.27661	5.21653	4.39678	4.5964	9.13054	12.1866	2.0874	27.3078	12.7449	19.3672					10.5078	0.806208	0.177261	2.9322	0.0569128	17.9121	0.344866	0.51516	0.667052	0.163937	0.31818	2.37147					0.331452	0.602624	0.20644	0.0237748	3.34309	0.12891	8.17093	0.0940694	0.599767	0.0398529	2.96606	0.0696414					0.063647
	4.41254	1.82413	9.28876	3.57583	2.25477	2.34228	5.63456	12.0921	1.75201	23.5289	13.5467	16.1093					11.0488	0.207726	0.155916	2.83852	0.0337752	16.6876	0.389717	1.42906	0.465427	0.158469	1.89338	1.07307					0.0671961	0.733264	0.198907	0.122563	2.2415	0.386039	5.83543	0.0231855	0.323828	0.0214066	1.34045	0.177113					0.0699317
	2.61466	0.443997	7.76659	3.65149	1.94369	2.39533	1.76996	12.1523	1.16888	20.5952	14.8039	15.3593					9.63582	0.47018	0.237138	4.6715	0.0441359	13.9702	0.370569	0.652358	0.424953	0.238278	2.15173	0.400895					0.188407	0.476775	0.171588	0.119836	0.663293	0.123263	3.87852	0.1474	0.197345	0.231137	0.426969	2.86385					0.00649589
	1.57176	0.171726	6.95727	4.45059	1.89162	1.99505	1.88646	13.3266	1.30913	16.0288	14.6264	13.0174					9.2785	0.630366	0.0454237	2.15654	0.081075	12.2725	0.267135	0.259243	0.665156	0.123767	2.05193	1.61326					0.239243	0.32819	0.166083	0.0174539	0.258383	0.220833	2.50654	0.0752615	0.544538	0.0842598	0.694956	0.716106					0.0146779
	0.867269	0.649828	9.75827	4.14822	2.11545	3.64264	0.552979	13.1179	2.91916	12.4859	15.5699	12.7261					9.15797	0.961737	0.161057	1.91477	0.0644166	11.2991	0.232212	0.0555508	0.35136	0.115284	2.10335	1.86932					0.261024	0.25601	0.224732	0.0843178	0.691074	0.425691	1.59118	0.0234686	0.28106	0.0465608	0.974253	0.903698					0.0935346
	0.538773	1.01346	8.02875	3.99609	2.66368	2.82512	1.28494	12.7529	1.4946	7.04985	15.3301	9.31954					10.1702	1.378	0.169116	1.28756	0.0632105	10.7618	0.148268	0.0509717	0.853515	0.0352789	1.46896	2.42612					0.903239	0.20757	0.147289	0.0697798	1.59318	0.208095	0.844356	0.051568	0.19197	0.0743623	1.26486	1.82609					0.0291403
	1.03129	0.948662	7.43922	3.18524	3.21763	3.13624	0.687211	14.0504	1.16793	3.03392	16.6449	9.74046					10.9191	1.61945	0.0246485	0.911363	0.0405067	10.0792	0.180808	0.159511	0.908421	0.109622	1.19048	2.4407					0.39001	0.333388	0.145545	0.0365916	1.07432	0.0625346	2.71951	0.00550423	0.192323	0.0634984	1.37685	1.16699					0.00668798
	2.87383	0.98494	8.41166	2.30036	2.73626	4.56756	0.599374	13.8322	1.46169	1.01141	16.4772	10.4827					9.82292	2.70604	0.0977877	0.549367	0.0395877	8.92462	0.0887904	0.157266	1.44603	0.0774252	0.890833	2.56916					0.338511	0.460555	0.112589	0.0427653	1.27993	0.0296489	1.32354	0.0195579	0.621662	0.0243232	1.91299	0.193501					0.0378588
	1.98803	0.960468	7.49778	1.82365	2.36255	4.3339	0.672555	11.4112	1.84798	4.94857	15.3454	10.7906					8.61272	2.35119	0.0905407	0.326628	0.133562	3.89917	0.416223	0.0962702	1.38877	0.111389	0.581307	2.19321					0.378499	0.28976	0.0639264	0.00596626	0.855754	0.123607	1.05466	0.0370798	0.266158	0.0226863	3.08703	0.345641					0.0653972
	2.57633	1.31155	6.1078	1.1672	4.79681	4.82319	0.491116	14.4275	3.28696	4.71951	13.7962	12.2729					8.82604	3.54947	0.0729808	0.0945469	0.0563201	6.46662	0.460456	0.608106	1.1603	0.0939999	0.240505	2.42451					0.398976	0.118258	0.154034	0.0443156	1.03069	0.0484421	0.896769	0.00899625	0.281676	0.0291839	2.56528	0.107059					0.0135619
	3.25762	2.6937	5.50744	2.8247	4.36878	9.72131	1.17472	13.7352	6.36338	4.58268	12.8151	9.14695					10.4838	3.34562	0.0673373	0.465931	0.131157	3.68136	1.6643	0.520451	1.03402	0.241393	4.23547	2.11685					0.736688	0.197401	0.326638	0.54962	1.24722	1.29494	1.63998	0.153459	0.621875	0.0879959	2.67697	0.398242					0.0996173
	3.35163	3.5969	0.349879	5.13124	4.27489	5.55457	1.231	10.0378	7.00776	5.59615	10.3968	8.49215					11.7422	3.32332	0.501156	2.44729	0.28942	2.08542	1.94454	1.5295	0.838364	0.78628	12.8652	2.29632					0.134196	1.87762	0.817142	0.300285	2.33526	3.51685	1.16481	0.422552	1.7307	0.638469	3.11412	1.73095					0.298182
	4.70582	3.62141	2.39468	8.03291	4.82499	2.78479	0.637069	9.18188	3.78625	5.19164	9.14495	7.86803					10.4145	3.08744	0.853278	3.54933	0.249929	6.12865	0.674515	0.80466	0.97338	1.36643	13.6823	1.67371					0.295533	0.978043	1.01256	0.769081	4.25849	3.59797	0.791709	0.644833	1.91864	0.619172	2.8231	2.47066					1.05387
	4.15317	4.00084	2.24613	10.27	6.50016	3.16977	6.35975	6.65562	7.10579	4.68386	7.25363	6.67562					8.91258	3.63147	1.29383	3.96394	0.697013	7.75855	0.303392	0.861436	0.787398	0.989146	19.2566	0.91081					0.452813	1.12764	1.38774	0.328035	6.22882	3.68841	0.67927	0.15951	1.57709	0.785682	4.21707	5.07656					1.21173
	5.17178	5.65293	1.15862	10.373	8.44272	1.27031	1.85083	5.52346	10.3097	3.3234	5.47029	7.56131					9.51509	2.99761	0.713715	2.65707	0.455634	9.85249	0.868677	0.793808	0.685898	0.564045	18.6656	0.571735					0.669166	0.581775	1.46602	0.323673	6.43934	3.17095	0.983292	0.261293	1.57002	0.556997	3.14561	3.40062					1.22393
	4.04998	2.49086	0.543109	8.39846	13.4509	1.29884	1.77957	6.03689	10.7327	1.58957	4.12576	10.5318					7.621	2.04381	1.47382	2.62829	0.182868	7.327	2.69825	0.6068	1.05763	0.190558	22.4918	0.875604					0.507356	0.341762	0.799085	0.185333	8.00859	2.5763	1.52091	0.169738	1.60997	0.250055	2.61375	3.25022					2.25432
	5.87499	3.86649	0.261401	6.45964	13.4571	1.18407	4.40935	4.43624	11.0112	1.26831	3.24482	7.35103					5.72071	2.37885	1.91299	2.89468	0.336542	6.67797	2.35986	1.18451	0.829291	0.525644	24.6832	0.837649					0.0495111	0.222503	0.664394	0.0625828	6.90522	1.93746	1.4837	0.173063	1.51878	0.479929	2.33272	4.8544					0.877469
	5.54856	1.27472	0.553027	5.99086	21.4421	0.174206	0.580359	3.59442	14.0841	0.326071	2.30425	6.27316					4.64023	2.11106	1.97435	5.55464	0.166825	8.18234	2.34637	0.722687	0.721754	0.996099	23.2156	1.5923					0.285535	0.433847	0.638747	0.326325	5.37488	1.48217	0.839168	0.0553818	2.18827	0.670632	3.29499	3.31482					1.64021
	6.11538	0.506323	0.761116	5.15199	24.4809	0.445829	0.59364	2.4531	10.0841	2.34068	1.2882	6.06385					3.80234	3.41469	1.93791	3.43503	0.172917	6.72215	2.61478	1.50599	1.42189	1.14358	27.0728	3.73884					0.124458	0.413639	0.567119	0.193518	4.38632	2.70172	1.09442	0.178632	2.71393	0.305803	3.67245	5.82135					2.29988
	4.74668	0.519805	0.718282	4.64476	25.8427	0.323276	1.74552	1.503	6.33801	6.90411	1.83659	6.7302					2.20564	3.30818	1.43276	3.33287	0.0655419	7.07207	3.37746	1.65774	1.2903	1.221	22.0789	3.4763					0.130769	0.341622	0.775977	0.1125	3.50249	5.33051	1.82892	0.531294	2.64465	0.134395	5.18405	6.27665					1.41831
	5.2764	3.34754	1.13218	4.52351	26.8096	0.426809	1.23377	3.24554	4.854	13.7394	2.65763	10.9428					0.96323	3.63536	2.66626	3.36363	0.182885	5.51608	3.80461	0.707815	0.793087	1.3922	23.854	4.5033					0.106867	0.232537	0.654563	0.286662	2.88235	9.40003	3.96619	0.21376	3.24199	0.645728	5.36283	7.23709					2.11249
	3.29367	4.80259	1.27419	4.16042	27.4907	0.843588	4.53809	0.234161	3.65468	19.2093	5.12599	8.96091					2.38371	3.04907	1.79366	3.30284	0.0839479	6.35897	4.42839	0.943912	0.757256	0.982888	21.883	4.86595					0.174262	0.570482	0.488566	0.284136	1.62051	14.4252	6.77122	0.265796	4.86004	0.388059	9.00885	6.99968					1.04322
	3.08752	6.59555	1.15058	3.53404	26.1091	0.582154	1.14214	1.36082	4.33531	24.8452	5.58434	11.1					3.49812	6.11439	2.12552	5.43315	0.205622	6.89891	4.17574	0.766631	0.960901	1.11801	22.1342	3.67426					0.0924667	1.57397	0.403118	0.172428	2.66575	16.9531	3.36363	0.1926	9.51902	0.329271	8.22663	6.78975					0.219363
	2.34689	9.80518	1.09693	2.71896	25.2329	0.861101	0.626496	2.24809	6.16483	28.2231	8.29914	11.5753					4.55715	4.27805	4.92823	5.36615	0.0922394	6.53787	3.52195	0.613386	0.755911	1.68283	21.8208	4.75875					0.204915	2.21582	0.480087	0.0341513	1.30239	15.662	2.85851	0.370472	12.136	0.481489	8.53183	4.53886					1.28665
	5.14383	11.68	0.619015	4.37965	25.8007	0.519663	5.23868	6.08623	6.57164	28.3261	8.97129	9.99864					4.12049	3.53996	5.7607	6.70154	0.0773602	12.6932	2.46963	0.448523	0.908344	0.702255	23.6593	6.34215					0.20492	3.74339	0.423939	0.286681	1.78106	13.7578	1.92083	0.778159	9.76174	0.365364	9.10145	5.58523					0.548216
	1.73473	16.301	0.734301	5.89992	25.3912	0.611458	1.21022	6.45383	9.07006	25.9714	9.7595	11.3298					3.89593	5.87915	5.07183	7.51049	0.137021	8.50994	1.67406	0.46714	1.32215	1.24554	25.0993	7.71862					0.313809	2.98235	0.317961	0.0747706	1.43025	10.4852	1.56351	0.212856	11.6008	0.348932	6.84201	8.17745					3.83026
	2.26011	18.8195	0.421874	8.49726	27.1331	0.459708	0.925261	7.50131	9.89089	24.8833	12.4142	6.58243					3.27301	3.09157	1.96105	7.38666	0.217806	11.1278	1.05597	0.591913	0.877271	0.919309	21.5004	9.57949					0.299589	3.21362	0.202327	0.102339	1.55121	8.8795	1.10451	0.0856364	7.65875	0.379383	7.31775	4.06836					2.0143
	1.16248	20.9214	0.463362	8.86522	23.2302	0.205671	0.915188	9.58577	11.0071	21.3983	12.8519	7.08324					2.51697	2.77807	3.64864	7.73934	0.0304683	9.56655	1.04407	0.169463	0.451273	0.676942	20.6302	8.68984					0.178225	3.0094	0.0560909	0.0199337	1.17082	7.59772	0.771683	0.0995913	7.28371	0.24309	7.95556	3.06512					0.743057
	1.04907	20.4268	1.22654	8.55144	23.2898	0.308568	0.734851	11.0429	15.59	20.9946	15.5298	9.42336					1.60161	2.32519	1.16187	5.64734	0.135232	10.4942	0.658312	0.178695	0.495402	0.438756	16.0973	8.03771					0.0597016	3.50314	0.0704488	0.0139029	0.975652	5.32128	0.555492	0.0594782	6.26473	0.142624	9.63278	2.13584					0.831794
	1.84646	19.0715	2.03238	7.78758	24.0769	0.0883117	0.899073	10.8649	15.6249	18.1645	17.0749	6.5822					0.696868	1.27974	2.63265	4.92982	0.0396982	8.9959	0.12908	0.0648965	0.462988	0.533892	10.3903	7.4894					0.0675154	4.27748	0.0711845	0.0394116	0.824808	4.12152	0.237666	0.021213	5.0686	0.243688	8.60751	1.55723					0.779733
	1.28335	16.958	2.86232	9.159	30.609	0.160887	0.243599	15.237	15.8698	16.7221	17.8365	4.5905					0.55797	1.68919	1.51686	3.84886	0.0828877	6.96071	0.535065	0.140247	0.203372	0.253204	7.16919	9.21318					0.074139	4.46691	0.0650902	0.0356165	0.629406	2.46685	0.167724	0.0225257	3.0737	0.114599	11.7882	1.01429					0.467673
	4.2976	13.7853	2.62625	10.1952	24.0923	0.21341	0.264471	11.6462	18.0096	11.3104	15.5058	2.33438					0.516431	1.21596	1.51667	2.48887	0.030218	6.3805	0.238503	0.165627	0.285368	0.168883	4.45392	6.56641					0.160579	4.66163	0.0807482	0.0329026	0.561983	1.38838	0.117721	0.064249	1.17936	0.0640558	9.78305	0.434023					0.503451
	2.02015	12.671	6.11907	15.2013	25.9703	0.0350204	6.0373	15.0887	22.2659	8.50856	18.0578	1.49736					0.0487261	1.37263	0.889548	1.65174	0.0499913	6.69243	0.361771	0.0969554	0.290782	0.104599	2.17788	6.37612					0.0551371	4.61375	0.0725237	0.0501797	0.462201	0.663063	0.205317	0.0505228	1.38818	0.189948	12.1225	0.348421					0.241335
	1.68757	8.73958	4.94372	11.8009	26.6197	0.0712678	1.55335	13.3543	20.6867	5.4276	17.4658	1.15483					0.395649	1.1985	0.505232	1.18423	0.0493748	5.27454	0.479273	0.191544	0.107226	0.166193	1.20082	6.87992					0.0333325	5.21085	0.0983024	0.0231913	0.170138	0.247617	0.0973158	0.087872	0.607796	0.0394048	9.99029	0.273164					0.372935
	1.60334	3.69226	6.40234	10.7082	22.7242	0.219619	1.91963	12.3674	22.8113	3.26671	18.1671	0.765356					1.05594	0.970697	0.174035	0.746812	0.0104341	4.72069	0.338925	0.0733817	0.0744536	0.165509	1.20712	4.95563					0.0985148	5.04676	0.0665295	0.0555672	0.170965	0.760071	0.149554	0.0251899	0.837982	0.0228374	12.5939	0.66286					0.708469
	1.81615	4.01881	7.38048	9.53775	24.4841	0.021502	1.79106	16.0807	22.4331	0.197265	14.3495	0.20848					1.14715	0.564967	0.123134	0.48078	0.019371	1.12963	0.25785	0.119429	0.410219	0.229174	3.23058	7.71146					0.0356926	4.74832	0.0282798	0.0644109	0.120523	1.21806	0.190381	0.0143677	1.5138	0.020226	8.37035	0.635002					1.49178
	1.95023	0.954795	6.54133	7.37415	22.4134	0.0791409	1.93384	12.3385	23.2139	0.499575	12.0032	0.618774					2.26118	0.573892	0.271185	0.859386	0.0259872	6.73591	0.29866	0.151698	1.18959	0.167324	2.20396	5.9377					0.683322	5.396	0.0378035	0.0311628	0.129562	0.957445	0.15283	0.0245559	2.25821	0.0170058	7.78026	0.538974					1.45838
	3.42425	0.812137	9.25213	5.97566	21.8821	3.77917	1.75778	9.34183	22.4858	0.357156	12.198	0.69505					1.8995	0.300633	0.389978	0.572268	0.0987546	4.03141	0.176149	0.0823103	0.739479	0.110037	2.81827	5.52981					0.224691	5.2955	0.0372105	0.0250936	0.105121	0.769121	0.13702	0.0647453	2.32448	0.0573514	7.6936	0.628568					1.69415
	4.86684	2.70257	11.2645	6.41724	23.9564	2.5198	1.73153	9.33326	20.8667	0.304965	13.2931	0.524992					2.07826	0.269636	0.163657	0.453328	0.171213	4.25959	0.154713	0.0386635	0.574014	0.029793	2.89492	3.82853					0.55127	6.11113	0.0732027	0.0718219	0.424405	0.787079	0.344917	0.0887086	1.88604	0.0489619	7.47399	0.511963					1.89807
	4.18518	3.80614	10.859	2.09086	21.6688	1.59893	1.80475	9.00712	19.9174	0.129625	13.952	0.343772					1.81997	0.803834	0.297854	0.659148	0.108421	6.0815	0.0691855	0.176411	0.458259	0.199941	2.20345	1.59112					0.0796065	6.70751	0.039517	0.0773166	0.0977704	0.666586	0.213074	0.0698467	1.4976	0.0792183	6.97986	0.366465					1.82111
	6.88562	2.80722	9.56263	4.22835	18.2748	1.4141	1.60131	8.84052	18.2983	2.26862	11.5322	1.09332					1.13669	0.797003	0.405261	0.772242	0.14593	5.63176	1.75019	0.298546	0.59169	1.55738	3.32017	2.14811					0.128632	9.38429	0.0275913	0.104303	0.170066	1.09064	0.136262	0.185275	1.05042	0.302445	5.65788	0.415608					2.70596
	2.62974	3.07093	6.92228	0.911098	17.4025	1.62025	1.41791	4.92728	17.3804	4.59216	11.5543	1.13834					0.245982	1.70663	0.657183	1.46981	0.373736	9.1365	5.65707	0.298031	1.63253	2.75651	4.61731	3.38937					0.192016	13.4025	0.259291	0.191118	0.0452263	3.12973	0.330859	0.0969239	1.01756	0.22366	3.76195	0.947881					4.84706
	2.50363	3.16479	6.16527	0.978769	13.4482	1.76976	0.803677	3.17236	17.6269	4.82252	8.68812	0.78084					0.430951	1.07749	0.410655	1.06965	0.472191	6.17702	9.30369	0.254053	4.22378	2.35079	5.02466	4.32639					0.082092	16.9225	0.585407	0.420927	0.261118	5.0683	0.358165	0.0597526	0.772617	0.404402	2.12351	2.06213					9.55375
	1.62628	3.46295	5.1457	1.09621	12.2419	1.65374	0.575682	4.62593	18.8203	2.87535	7.782	0.951271					1.15285	0.938708	0.201726	2.44552	0.490253	7.27164	17.7334	0.507063	5.6787	1.20938	4.91026	3.44784					0.374686	20.028	1.54718	0.309197	0.046103	6.97795	2.46646	0.167408	0.586444	0.409227	1.50452	4.2074					6.6366
	2.43843	3.7117	2.82102	0.727462	9.30675	1.38735	0.453013	1.61026	23.1534	6.44923	5.62106	0.802744					1.05947	2.81413	0.116516	1.31706	0.269972	4.84712	15.7116	0.275027	5.90275	1.34482	4.589	2.23118					0.177892	23.6076	2.97342	0.472928	1.70602	9.12804	1.21798	0.528534	1.4326	0.317575	0.0442081	4.59181					7.03188
	3.8158	3.91305	3.50805	2.38147	8.04238	0.908946	0.802658	4.07614	17.7975	6.08559	5.3903	0.614583					0.649921	3.36244	0.153841	1.57513	0.121997	4.98205	12.442	0.121631	5.36718	2.29341	4.2256	2.09933					0.806614	24.2426	1.6885	0.382158	3.06215	8.18313	1.42883	0.386417	1.30595	0.337745	1.04025	4.29262					8.17232
	2.19631	1.87521	1.54259	3.59026	9.7906	3.73667	0.956659	1.15655	15.1337	6.28179	5.47512	0.777944					0.857073	2.8256	0.058317	2.06319	0.11389	3.4186	9.45478	0.121626	5.08308	3.15139	4.36426	1.43641					0.515622	24.9645	1.55843	0.768917	5.13462	8.84472	1.61389	0.198696	1.12579	0.180977	0.505246	4.955					7.74114
	2.39917	2.00125	1.03395	5.67747	7.53517	0.801798	0.983937	1.93521	11.1723	6.35679	3.37936	0.783635					1.79661	2.40176	0.321196	1.22928	0.260706	3.55667	10.1687	0.208856	4.85267	2.62846	4.00193	1.55949					0.117857	27.7435	1.41613	0.435296	9.29538	12.4468	1.58591	0.0543284	0.567558	0.236842	0.832982	2.76861					7.61393
	4.21293	0.883599	1.03059	8.233	5.56224	1.66787	0.967024	0.732405	3.98503	5.39312	2.42991	0.609389					1.91298	2.0259	0.302725	1.66961	0.2022	2.49568	16.4416	0.227831	4.36718	2.99488	6.17681	1.28397					0.245323	30.7207	1.05489	0.417875	11.3526	12.98	2.52445	0.307423	0.842767	0.19881	1.47425	2.38984					6.51148
	4.16411	1.37247	1.16136	11.2482	4.47623	2.54175	0.434916	0.127158	1.84647	4.8275	2.86823	0.172802					1.55415	1.88218	0.641622	1.32782	0.526774	0.680502	7.78262	0.191537	5.10677	3.03315	7.72058	2.34002					0.375538	31.6297	0.732705	0.331777	11.3432	16.6444	2.02596	0.282814	4.84363	0.181321	2.3553	4.91535					6.5834
	6.39302	1.19049	4.88555	14.6449	5.40772	3.66706	0.857335	0.701973	3.40478	3.80304	2.4332	0.371499					2.05484	1.31789	1.65934	1.00211	0.341887	0.224341	17.8758	0.0593766	5.97593	3.69093	9.34603	1.17859					0.322184	30.4424	0.581679	0.279054	11.5794	16.7436	1.81429	0.187096	2.58997	0.150486	1.99925	9.57696					4.81563
	6.39966	1.52419	3.80969	17.4276	5.66425	1.76298	1.64755	0.60281	0.226366	5.8054	1.67675	1.02616					1.40355	2.63195	2.56581	0.786997	0.502371	0.536136	11.2101	0.125491	6.92992	2.80417	11.0682	4.79872					0.240284	27.7566	0.567823	0.244495	15.351	15.0783	1.24	0.306388	2.20679	0.478394	2.15344	14.7964					4.19486
	8.18338	1.24331	4.1084	22.1096	4.0293	2.08594	0.881655	0.924247	5.51534	3.69927	1.19632	0.647714					1.18741	3.65747	1.62025	0.489233	1.12274	0.742057	12.3261	0.127296	8.38808	3.80062	11.5755	1.74928					0.404668	25.5825	1.00552	0.0934855	20.0822	23.6831	0.723715	0.680005	1.71117	0.299356	2.87032	17.3672					2.93574
	11.8334	1.68289	7.13515	25.0663	4.94444	2.44062	0.405242	2.30183	5.84786	2.20128	1.74781	0.166756					1.08132	2.98947	1.18898	0.27054	1.26979	0.849832	12.2043	0.0196696	8.33649	3.24612	13.4094	0.96268					0.29017	22.6099	0.724322	0.0935161	25.5498	21.1137	0.567394	1.59335	1.50182	0.200734	3.58327	17.2644					1.93281
	10.5777	1.73793	5.96807	24.062	2.32227	2.37193	0.686922	0.918365	8.26494	1.60115	3.10623	0.218264					0.880424	5.28591	2.14899	0.435094	0.841537	0.622099	10.2665	0.0739117	8.06104	2.80079	15.0051	2.59744					0.349081	19.0422	0.683711	0.346199	28.1975	21.3814	0.42005	4.00796	1.2974	0.200899	4.49502	22.9183					1.67064
	9.92148	2.73173	8.28007	25.5821	1.42575	2.07988	1.51253	0.772844	2.84871	2.1484	1.36038	0.169927					0.470966	5.44463	3.9731	0.398862	0.695454	1.06316	7.18671	0.118201	6.79051	2.71922	17.8869	0.929307					0.174703	15.036	0.666925	0.0588138	26.0676	19.9363	0.235511	1.91273	0.730951	0.103444	4.79444	21.897					1.02483
	10.6887	1.84758	8.31131	24.6133	1.52147	1.21698	2.5327	0.541125	6.47204	1.01161	1.2299	0.733388					0.44356	4.95855	3.18033	0.170885	0.477689	0.937889	4.73717	0.0615253	8.63695	2.0384	18.7125	1.06881					0.0841395	12.2341	0.504842	0.173638	25.9412	17.9239	0.327237	1.6258	0.691119	0.251704	5.44704	19.0957					0.504761
	10.4393	0.686897	8.35699	22.2752	1.94555	0.409879	2.62823	0.518786	2.6304	0.273432	0.679115	0.776852					0.290764	5.76492	3.36212	0.18251	0.36776	0.677161	3.37764	0.0568485	6.67135	1.11899	17.163	2.48049					0.165702	8.98796	0.435493	0.175103	28.2889	16.0512	0.243748	1.36007	0.435841	0.348386	5.39611	13.0168					0.221877
	8.66362	2.03819	7.38978	18.2565	1.77958	0.547286	3.27724	0.212672	2.60526	0.87955	0.568371	0.6069					0.504927	5.06189	3.54046	0.116296	0.41657	0.737892	2.76456	0.152324	6.34317	0.876656	16.7591	3.31691					0.0419638	5.95099	0.303932	0.0862908	34.6228	16.0601	0.296738	1.36119	0.498957	0.0681521	4.15773	10.5253					0.263431
	6.73556	2.60644	7.62154	15.8866	1.54284	0.25386	3.64747	0.702939	2.68979	2.32473	0.516032	0.496272					0.312029	4.28331	4.03698	0.110817	0.300238	0.630881	2.45697	0.105302	8.25157	0.360275	14.1159	2.0787					0.0534226	3.32884	0.200337	0.0410893	36.0667	11.4153	0.155031	0.861656	0.125625	0.134113	3.27505	8.38805					0.430634
	4.70123	4.17249	9.1985	13.5591	1.1283	0.372823	4.62685	3.42491	1.15694	1.61044	1.01205	0.625577					0.23517	3.92187	4.07656	0.180379	0.139467	0.352128	0.644382	0.0947724	8.39042	0.25498	14.854	1.4206					0.0724617	1.88497	0.154172	0.0455129	36.7317	8.82464	0.243799	0.538108	0.173237	0.115768	4.67155	5.13978					0.429895
	3.80519	6.61484	9.07363	10.496	0.881075	0.629953	4.12944	1.81254	1.29544	0.717364	0.563764	0.705731					0.26139	2.28075	5.35044	0.131972	0.200788	0.154232	1.31503	0.0806597	9.97109	0.226924	12.6336	1.39808					0.195019	1.03582	0.0843663	0.0274572	34.8636	6.11231	0.162356	0.517049	0.216555	0.0328671	3.16419	3.00894					0.383198
	2.68721	10.2227	10.5494	9.70362	0.806997	0.260886	4.70314	2.76456	1.28576	0.997293	0.418126	1.14075					0.457615	1.95222	4.06762	0.0886937	0.139486	0.235693	0.412267	0.124219	11.1859	0.448865	11.8297	1.45645					0.0879189	0.375984	0.0474733	0.0540411	30.017	4.82219	0.189749	0.255642	0.0511538	0.139287	2.54766	1.28394					0.460731
	2.74196	12.1174	10.6957	8.81963	0.144116	0.271583	5.73239	1.80809	0.220106	0.355071	0.100654	0.794778					0.313507	0.887367	4.55461	0.115394	0.146173	0.367303	0.580095	0.107407	9.30373	0.624633	11.5902	1.33908					0.120774	0.955161	0.0333715	0.124667	25.1043	3.00566	0.126395	0.143113	0.117159	0.0159244	1.07298	0.306207					0.420591
	2.05764	11.5444	13.7078	10.9246	0.271739	0.594269	4.41888	1.78069	0.601824	1.33589	0.228013	1.44529					0.218221	0.551531	4.39339	0.0604113	0.0558664	0.315295	1.08537	0.0512863	9.68588	0.309298	11.5104	1.17795					0.0269613	0.933695	0.00816482	0.0467163	20.4366	1.91329	0.089982	0.02497	0.137869	0.0833392	0.953829	0.29942					0.324545
	0.751238	15.1588	13.0046	10.8511	0.554085	0.168151	4.20897	1.08435	0.452962	1.49204	0.423557	0.328132					0.154946	1.36355	4.17803	0.249343	0.0610624	0.393177	1.57777	0.0611802	8.95057	0.437873	11.1714	1.36673					0.143998	1.68865	0.0233951	0.0663553	20.4204	1.0923	0.0737073	0.0523586	0.13459	0.0681729	0.125905	0.785278					0.316351
	1.08729	17.5673	13.5325	11.1872	0.369057	0.220759	4.14186	0.516458	0.842914	1.13044	0.435503	0.764841					0.148391	2.4807	3.5781	0.0226966	0.102478	0.0876987	1.5785	0.0415151	6.54814	0.463524	10.6332	1.02496					0.0318926	1.26681	0.0730592	0.0762066	16.8958	1.03108	0.0751234	0.0821636	0.148464	0.0145491	0.409346	1.17578					0.166803
	1.73727	18.5795	13.4464	11.9	0.227648	0.375489	3.43903	0.578038	1.07814	0.814502	0.426525	1.34988					0.106689	2.30472	3.09695	0.0300413	0.13548	0.0789777	1.59641	0.129927	4.81863	0.576472	10.4636	0.719551					0.132886	1.05469	0.0586162	0.0777397	14.1575	0.779406	0.105403	0.107679	0.188091	0.0904622	0.986668	1.21774					0.206483
	1.10986	20.3831	15.3393	11.0768	0.238643	0.11336	2.76786	1.19082	0.762526	0.422985	0.928677	1.52426					0.186046	1.93263	3.21533	0.0250388	0.0868256	0.286406	2.26162	0.100434	4.31047	0.318664	9.88549	1.00595					0.0722195	0.786395	0.0824631	0.0681363	8.37533	0.768315	0.115155	0.199012	0.121489	0.0309592	0.762609	1.07745					0.140415
	0.433282	14.9795	11.5048	11.4883	0.183539	0.141238	1.88183	0.684908	1.02619	0.148806	0.94576	1.34091					0.0508494	1.42775	3.26539	0.0410432	0.446054	0.230297	3.23991	0.0818763	1.7396	0.185446	10.9033	0.115012					0.112083	0.547443	0.0271651	0.0638946	2.43769	0.831776	0.0254926	0.114586	0.107398	0.0129719	0.833382	1.02594					0.105118
	0.648879	11.322	8.89065	13.8061	0.67261	0.435718	1.33421	0.538556	1.03206	0.447266	1.49569	1.56222					0.236207	3.16727	4.9086	0.16329	1.45546	0.581163	2.90808	0.114324	1.18303	0.439436	8.10074	1.50363					0.0702243	1.38308	0.113811	0.504903	2.50024	0.229701	0.197954	0.187508	0.136934	0.214002	0.426012	0.893812					0.00140743
	0.769256	8.75102	8.95392	13.3055	0.468074	2.02966	1.03826	0.743412	1.08777	2.13032	0.692619	1.10206					0.125757	2.55125	6.1305	0.671049	1.26786	0.74381	3.1164	0.363134	4.10637	0.870492	8.96316	1.68962					0.19149	0.363951	0.810977	0.198883	3.4766	0.804259	0.532366	2.26958	0.291676	0.201694	2.17297	2.15834					0.153902
	0.667464	6.24324	6.91043	10.7471	0.354712	3.08579	1.29791	1.1156	0.456089	0.644958	0.632995	1.36749					0.220004	1.70121	9.25348	0.5516	1.71989	0.643052	4.205	0.334643	2.35113	2.14352	5.15856	2.76893					0.64331	0.977785	2.00623	0.450197	1.94701	0.581798	0.333441	1.72276	0.0964594	0.173563	1.2649	2.07945					0.700356
	0.751295	3.93543	10.5141	8.433	0.97662	3.28229	0.795611	1.79819	1.09522	0.843319	1.43697	3.31927					0.136024	1.17566	10.693	0.71114	1.4704	1.09242	1.75707	0.314032	2.07871	1.0296	3.24449	3.60081					1.57978	0.773041	1.92094	0.361234	2.11627	2.29372	1.11802	2.18371	0.348451	0.252888	4.44866	1.18755					1.75496
	1.15602	2.48218	8.11117	7.38691	0.331355	4.13856	0.512411	2.09304	1.86784	1.85404	0.838867	2.86084					0.471333	0.462901	16.3358	0.49151	1.31803	0.66908	1.30959	0.336759	1.32172	0.605773	1.64315	3.41366					1.60484	0.935417	1.39367	0.316137	6.34525	4.04501	0.996119	2.12805	0.631715	0.0653744	4.28647	1.51417					1.34351
	0.824904	1.33264	7.47688	9.90546	0.281953	4.73474	0.731558	4.84898	2.108	2.49096	1.1334	2.25986					3.73144	0.313835	17.8829	0.79563	1.34287	0.530212	4.19591	0.844389	1.01022	0.304156	1.40271	3.43635					1.45002	1.00593	1.60672	0.207371	9.29146	8.37317	0.350254	1.5023	0.691016	0.457805	2.98923	2.46229					1.47386
	0.744016	1.52173	8.76132	8.98904	0.394848	4.58841	1.27825	3.69726	1.30517	1.00293	1.455	4.69528					2.57477	1.12574	15.1467	0.729593	0.739627	0.215042	6.61664	1.81403	0.890845	0.631563	2.33793	3.93451					0.853781	0.913905	1.44601	0.343654	7.73626	9.34332	0.240703	1.72977	0.0753461	0.420167	3.62083	5.84185					1.69505
	1.11176	1.68197	10.162	10.0535	0.110136	7.37686	5.08894	3.92727	0.130439	1.37571	1.54081	1.98568					3.57687	1.38372	16.2082	0.617317	1.26575	0.459001	5.70579	1.54686	0.407528	1.04921	3.35844	5.66219					1.00062	0.717035	1.45944	0.193563	7.15064	13.5898	0.180964	1.46036	0.220152	0.221137	4.21333	7.42808					1.355
	0.720887	1.03196	9.15382	11.6313	0.878405	7.25572	7.81769	3.61295	0.894054	2.77964	1.62145	2.62916					3.67068	0.39961	14.4838	0.612732	1.74606	1.60088	4.33537	1.45853	0.56843	0.595243	2.99783	5.06998					0.216089	0.659398	1.31024	0.184803	10.3728	8.93315	0.23038	0.940608	0.129354	0.277668	4.02227	12.587					0.845939
	1.19608	1.65367	11.7716	12.7771	1.33165	8.14897	7.4923	3.84277	1.2532	3.21159	2.39842	5.06941					2.33419	1.80627	15.277	0.605325	2.0538	1.77959	8.89116	2.18274	1.214	3.14651	3.06233	4.9138					1.35979	0.723578	0.935641	0.387065	9.0775	16.596	0.129462	0.790593	0.231224	0.0238658	4.73045	15.9067					0.624174
	0.632536	2.16103	9.33272	13.2314	2.31783	4.61835	8.88171	4.97465	1.27191	2.51112	2.45066	1.48964					1.92796	1.24757	16.3556	1.08522	2.68879	2.58195	10.4562	2.36407	1.26809	4.61457	3.32122	5.32245					0.952187	0.913853	1.23737	0.363778	13.3989	14.8293	1.75073	0.593052	0.617216	0.24745	5.38888	18.0409					0.587795
	0.297475	2.03767	9.69711	16.8529	2.5367	6.11303	9.47308	4.19116	1.20115	7.40713	3.0364	5.18842					2.69329	1.83115	10.9655	1.25671	3.12735	2.29159	10.8665	2.84776	0.900657	2.78656	4.57927	5.02758					1.69062	1.59404	0.864529	0.212986	14.9927	15.5983	0.62895	0.278941	0.125383	0.1463	5.37582	16.8547					0.36275
	0.375161	3.001	9.04586	18.0849	3.20207	4.90238	12.5058	4.90934	2.82795	7.86754	4.69568	4.47594					2.20556	1.62946	11.7401	1.95551	4.02278	2.60322	10.2779	2.66943	1.27654	2.01885	4.00942	4.74515					1.40013	3.28677	1.66807	0.141975	13.8991	13.7689	1.18402	0.0661159	0.259451	0.131698	3.97644	17.7397					0.307378
	0.853045	2.30462	10.5576	18.4672	3.36789	5.72485	10.2811	4.2313	4.47469	5.93069	3.91714	7.19705					1.54277	1.93337	10.6213	2.26085	4.85441	2.03006	8.30959	2.59779	2.08475	0.675528	3.38604	4.55993					1.62875	4.04827	1.25845	0.128826	15.0587	14.0015	0.226672	0.152405	0.243454	0.134642	3.43798	20.7239					0.301439
	0.30796	2.7309	9.67863	13.8108	3.24044	7.11685	8.43263	4.25403	3.5441	8.12294	3.98443	4.96113					0.503318	1.76983	16.2797	1.92639	5.40259	1.79049	7.78298	2.25733	1.78247	1.01591	2.98481	4.23821					1.47036	5.6552	0.923775	0.122571	12.0238	10.7036	0.266638	0.0940561	0.598735	0.217249	3.12852	24.2171					0.676117
	0.29265	2.55075	7.79901	12.0247	3.36893	7.99077	9.75042	4.37816	5.93081	9.39002	3.75573	10.129					0.895788	1.67536	14.65	1.64366	4.34737	1.37793	6.54749	1.74502	2.58363	0.699012	2.9475	3.42957					1.43144	6.05563	0.767098	0.15278	12.4431	8.50912	0.239181	0.163858	0.221341	0.114427	1.73534	21.0013					0.525617
	0.22455	1.8207	7.96356	11.5398	4.03571	9.94313	6.7449	2.75063	8.80411	7.39119	3.91691	4.53906					0.748981	1.40881	12.8244	1.35041	4.01606	1.11298	5.11797	1.52421	2.37588	1.71704	3.07126	2.63925					1.1501	6.87002	0.576336	0.0916327	8.68053	6.66224	0.103866	0.271028	0.415736	0.0244449	2.78091	20.1824					0.141237
	0.299798	0.759634	7.33051	10.7739	3.43619	10.963	4.41103	2.41407	9.94144	6.62896	3.58122	3.59942					0.408051	0.754948	7.76755	0.972299	3.00459	0.818654	3.34168	1.23951	2.94288	2.26503	2.6957	2.0231					1.23011	7.39164	0.136971	0.0724035	6.83239	6.21306	0.0554098	0.166643	0.214708	0.208844	0.782032	18.8172					0.019847
	0.241473	0.620015	5.13469	9.39496	2.21434	9.27686	3.54691	1.52948	11.4747	9.91484	3.39754	2.69626					0.417683	0.200074	6.04007	0.690499	2.28106	0.469353	1.81531	0.745237	4.22963	2.28484	2.78204	1.76253					0.989769	7.40527	0.0896405	0.10079	5.15569	6.22998	0.0867382	0.11896	0.152314	0.0504229	0.321104	18.833					0.159447
	0.250369	2.48873	5.13403	11.0979	1.76248	11.6214	1.75706	2.43922	11.7728	8.203	3.21186	4.68996					0.408977	0.431099	3.19502	0.57878	1.04607	0.778878	1.05799	0.614662	5.4681	2.27994	3.31072	2.78087					1.25881	9.61261	0.197287	0.111474	3.24261	3.44032	0.0546341	0.202811	0.227798	0.0662412	0.407161	18.1715					0.0958365
	0.579685	4.93164	4.82695	12.4725	1.88782	11.9216	1.00878	1.14451	13.0262	7.81204	3.87089	2.88326					0.459955	0.311446	1.54873	0.457558	0.950046	0.0482344	0.813333	0.653185	5.08293	1.7	3.41572	1.99408					0.739409	11.6638	0.1677	0.0918927	2.04271	2.7049	0.112016	0.12714	0.0946253	0.035649	0.651864	17.4016					0.129972
	0.147952	6.21511	4.14509	9.7912	2.50204	11.5278	0.530271	0.735694	11.2519	7.49873	3.61776	2.98347					0.600655	0.0805901	0.652472	0.313376	0.620252	0.23265	0.496139	0.293742	5.06583	1.79245	3.95312	1.97187					0.652026	13.3955	0.136878	0.100423	1.46355	2.14403	0.076351	0.105313	0.0575622	0.135433	0.0499868	15.7557					0.103563
	0.514381	6.9729	1.89359	9.18065	3.37243	12.0507	0.741814	0.168506	10.9903	8.00942	2.7238	3.46942					1.13521	0.165109	1.50681	0.228446	0.299384	0.205742	0.711046	0.265479	5.17094	2.2173	4.46643	1.77685					0.384018	13.0193	0.0434324	0.0450333	2.06842	1.997	0.0688388	0.129552	0.158568	0.0313333	0.297065	14.1843					0.140884
	0.0727387	9.42316	2.03225	7.57922	3.38155	11.6951	1.12761	1.20725	7.77524	6.13605	1.89866	5.46585					1.01682	0.057171	1.58509	0.472755	0.164013	0.264021	0.917446	0.152254	7.34851	1.83989	6.12476	1.40048					0.16657	13.6052	0.152772	0.0293238	2.24092	1.37213	0.0801644	0.127284	0.0433063	0.0926621	0.215588	11.516					0.0616808
	0.147259	9.3912	1.04473	7.48253	3.92369	9.09219	1.47362	0.640564	6.01369	4.58712	1.44468	3.13511					1.45618	0.149143	1.6952	1.08551	0.224193	0.238991	0.9028	0.121295	4.05321	1.44961	4.69121	1.63096					0.158665	13.3835	0.016646	0.116527	2.19813	1.32285	0.108747	0.0968859	0.0485582	0.0232566	1.61896	5.97413					0.0289761
	0.401836	11.3098	1.35291	7.24042	6.01868	7.83872	4.63963	0.8704	5.90562	2.92126	1.44216	2.19879					1.95411	0.0921383	1.6447	0.875597	0.703521	0.217921	0.778598	0.267841	2.27939	0.617973	4.67989	1.45676					0.183656	14.6062	0.0762349	0.0511435	1.92128	3.49071	0.0433802	0.0421687	0.104185	0.0123441	0.481604	4.76682					0.0119101
	0.463587	11.7938	0.911243	7.40847	5.33107	7.37437	3.7574	0.738452	5.57117	2.26783	1.09062	1.3681					1.98558	0.12058	1.66727	0.48249	0.895786	0.213715	0.926846	0.199339	2.09582	0.483731	5.73066	0.869371					0.172169	14.7564	0.140504	0.0405785	1.38223	2.37775	0.0534881	0.0297538	0.112841	0.0813335	0.192956	5.03434					0.0273941
	0.186012	13.2374	0.864169	5.07063	6.34574	6.15271	4.31242	0.561461	3.51703	3.1595	1.23218	2.78215					1.85524	0.12278	1.4076	0.498259	1.68931	0.265108	0.692114	0.175936	1.21809	1.04486	8.48814	0.318121					0.142704	15.6471	0.147672	0.0127832	2.47189	1.63293	0.070563	0.0149581	0.0843795	0.0792977	0.408872	1.77375					0.0374561
	1.1829	13.4411	1.92359	4.14887	6.23958	4.53237	3.58341	1.34501	1.2542	4.35603	2.2467	3.88982					1.69558	1.40969	1.65148	0.766609	1.12133	1.10904	0.207316	0.217776	0.786352	1.06396	7.93931	0.564093					0.353869	14.1953	0.387639	0.148854	0.826723	2.40742	0.76688	0.745238	0.226214	0.100204	1.46025	0.514086					0.0329894
	10.2801	14.8569	1.74401	2.07442	14.0528	8.91935	3.21969	0.738217	5.80084	9.57282	6.28327	10.3599					2.3558	3.3531	5.86148	7.12079	3.27649	6.72615	13.1033	1.73433	0.466556	0.902002	15.5356	0.339914					14.3973	13.5574	5.38857	7.98504	2.77543	2.36386	20.4684	0.378931	3.68014	4.89339	1.43004	4.31948					0.716177
	13.2643	16.2732	1.78587	4.27589	27.9409	13.8631	3.1987	1.23163	6.06456	13.3841	33.0892	25.6197					0.272032	7.44314	17.4154	8.94763	15.8156	13.906	16.5847	1.40327	2.31464	7.4932	45.4776	0.156013					32.3926	23.0593	9.07239	19.709	15.2839	3.5629	39.8443	7.2399	19.7474	8.13405	1.30833	6.67261					11.4836
	27.5796	13.4482	10.5982	2.15856	34.9719	12.698	3.17838	1.44259	9.29805	19.255	28.0239	22.4095					4.72679	13.698	16.4829	2.51438	24.3457	6.64023	17.0499	1.54123	4.688	10.6226	43.6409	5.97129					48.2056	47.5941	22.111	33.5618	24.5382	9.48289	32.7666	14.5329	32.2117	15.871	10.94	8.92648					23.2938
	49.1478	14.7148	6.51073	3.72109	46.0795	8.30538	7.01706	4.97487	9.94788	18.2861	42.9891	20.4298					21.6177	19.7751	4.06998	9.85008	32.3006	17.2217	18.6279	3.96888	6.40252	17.3493	36.7487	6.88987					53.3188	58.5969	29.4814	39.9524	38.5005	19.2122	52.7585	27.8521	36.49	23.5713	17.7083	9.16251					28.7845
	57.2711	20.003	8.13711	11.025	51.6633	5.14454	19.7096	14.5397	7.87054	10.7068	43.7524	15.8182					44.3984	28.7512	6.68551	23.9778	42.6429	23.5158	21.6018	5.10325	3.81359	18.5137	26.5295	3.61466					62.8505	66.5469	35.0357	47.4503	47.2076	25.8777	52.5097	43.6739	73.2273	31.7116	18.8417	16.787					56.8065
	58.772	37.1073	7.64259	13.275	61.2585	6.68552	22.3219	16.2956	6.17267	6.99635	49.3899	15.309					60.769	28.5364	15.541	33.8122	50.0169	23.9142	19.9246	3.24583	5.44417	18.6162	25.0013	10.409					57.1682	67.0242	41.8449	53.353	52.2768	36.5302	52.5097	51.8637	32.8251	38.9612	21.1264	24.4518					70.332
	53.251	44.6172	13.8059	33.9489	59.5478	17.5551	17.0418	19.6055	4.99322	8.35829	48.4566	14.2228					65.2996	25.3887	17.9785	44.3805	42.7451	17.1526	21.736	1.31283	5.31106	25.5279	23.9415	32.3782					59.1091	69.2627	48.4709	55.198	50.3296	39.0144	58.5237	52.4213	31.9339	34.2595	24.3478	28.1885					83.0495
	47.833	45.7808	21.6084	49.2785	60.154	27.0398	30.2442	17.7912	10.8078	13.9563	59.5717	12.9893					58.6798	37.1494	21.3794	41.8836	34.2142	18.2914	37.9039	0.755037	12.3313	28.0937	19.0156	48.592					57.5836	58.0221	48.4914	49.5423	46.9657	33.9542	55.9112	52.5743	44.5503	38.0528	30.6536	33.7645					94.4813
	35.9643	38.5476	39.5531	60.4873	57.0722	38.2648	38.3418	18.5544	24.5863	21.7843	68.7043	23.0701					55.7783	51.3491	24.2244	36.4657	29.2056	15.244	58.5809	3.14836	19.9694	33.2267	12.9863	60.4866					54.0073	49.4508	42.91	36.7355	43.7162	38.5741	63.1946	50.2804	38.8055	37.9471	43.0672	22.1244					94.8357
	36.2653	37.1771	48.6293	61.555	50.4141	40.1514	36.3527	18.6359	49.7762	28.7167	72.5986	39.8563					50.8767	55.4901	22.0209	27.01	24.547	15.0453	68.4465	5.89792	29.9592	41.3148	2.24635	64.8701					42.9827	41.6937	46.9341	31.7286	39.4253	42.27	74.077	46.6407	34.5115	35.2556	52.458	28.5775					66.7815
	46.279	34.1062	51.2681	57.5943	47.2964	34.7088	29.0881	18.4852	64.4728	34.0216	64.4033	56.1976					41.1759	56.636	19.234	24.1574	25.6062	15.5859	74.867	18.8254	42.3505	44.8343	14.9738	62.9415					38.6886	32.0399	50.027	23.2414	33.9343	43.7996	42.9002	46.4829	21.9512	36.5557	52.3805	28.1426					50.0985
	55.8886	41.9351	56.2678	53.4301	42.8368	34.8292	31.5922	13.1083	72.878	40.9673	60.1405	66.8854					32.056	54.3398	18.3001	24.1406	41.006	17.009	67.3712	48.3779	50.5388	40.6596	25.0403	51.934					29.3774	29.7338	48.1472	19.6347	37.8091	40.4197	7.54931	41.4887	16.6126	32.9441	45.794	26.4819					40.6821
	66.8132	49.115	60.1285	43.574	38.5906	40.1473	47.7382	35.0282	75.1723	52.4312	44.2598	74.1932					22.693	42.5	14.704	27.1622	45.9418	30.0399	60.8772	62.5294	55.449	36.4703	28.8293	47.8856					23.574	26.4143	45.2632	25.4795	44.9023	40.3526	11.1728	35.3422	13.8124	34.1348	44.961	31.1389					31.3752
	68.5587	50.5823	63.6132	38.7661	40.8917	38.6806	64.4035	63.6338	60.0154	63.2337	37.9829	73.2853					13.9291	36.3027	12.7407	35.0587	46.1564	38.8057	53.2715	81.5248	55.2802	33.8544	39.0739	42.9066					18.9297	22.3425	40.3501	25.6543	44.0765	42.9626	3.31837	35.324	13.9263	39.0696	43.8143	31.8547					24.8458
	70.0725	56.9417	55.863	33.4628	41.899	41.8834	69.0792	71.1649	49.0761	72.9926	32.7221	72.8726					9.50039	27.6298	12.3911	40.812	33.6376	39.9121	44.4611	95.3289	54.2396	30.9932	45.7984	35.9596					14.9896	20.2403	39.6847	31.4142	29.6361	44.4507	6.19729	36.7731	18.3436	34.9784	39.6597	33.6853					19.2161
	72.2534	61.3512	62.0102	31.3733	53.171	39.4136	53.9763	59.7728	44.9208	83.4955	63.5763	72.9566					5.48722	22.8556	21.2462	40.8084	25.8246	38.7637	36.8137	95.1217	57.3465	23.5136	55.0549	33.4172					11.903	16.2043	35.5036	37.9307	20.742	47.08	26.7885	47.3374	22.2184	38.1489	38.9385	42.6491					13.3262
	65.9982	59.8506	61.1417	31.3535	69.2828	34.9641	51.5604	63.2871	40.514	80.7676	93.7799	56.1258					1.67821	23.3456	25.9227	44.2922	19.8997	35.4617	38.5978	76.5395	57.3202	18.5628	57.4816	38.549					14.6302	15.6262	35.2325	41.3543	17.9015	41.7088	28.9693	42.1509	24.7137	43.8318	44.0746	47.1304					8.89248
	63.1378	55.9416	64.1064	44.2464	73.8609	29.9325	51.7924	64.851	34.0643	75.9372	94.7901	43.1043					3.93148	27.8616	23.2184	47.5703	14.3041	34.8935	45.1038	62.797	49.4913	11.5683	51.8267	46.7409					32.4273	14.6368	31.313	43.1102	10.8628	25.9384	47.5517	38.4396	35.8015	47.7065	45.4069	47.8747					7.12266
	47.1677	52.5674	59.2139	64.6302	69.6894	27.7121	43.7753	27.846	29.184	75.9856	88.2875	30.8894					4.28635	31.8523	17.7771	43.7801	10.5185	34.1198	57.422	46.0054	46.7959	3.61165	54.1328	49.2759					46.1009	19.9911	36.2274	42.2998	4.89461	16.5348	59.2736	26.7787	42.1467	54.2138	39.7542	56.9625					4.0408
	31.7585	45.7582	54.5437	72.1678	43.9275	30.0788	38.2556	26.9697	29.1302	75.713	28.4551	18.1316					3.18365	31.3439	10.1118	40.3324	7.03619	30.3389	65.1102	34.1468	41.4854	2.65106	55.7673	53.3694					48.6477	27.1459	38.0285	40.3209	5.0367	14.9642	62.1772	20.2683	45.8839	47.9076	36.9238	63.5206					4.27402
	20.4411	30.5717	46.0568	64.9522	32.1966	32.8423	30.072	15.1662	30.2498	65.9322	42.1108	2.20119					11.2353	17.4297	4.22068	35.2104	4.89875	30.737	60.9626	23.2793	36.8816	3.80616	51.1039	46.9495					50.0659	35.8157	36.517	26.1018	5.44089	17.7832	60.2582	14.6507	58.8468	45.0332	34.7619	74.1679					4.16173
	15.9418	18.9056	41.1634	57.3232	23.7008	34.0813	22.105	15.8135	40.2092	51.417	29.6444	29.2773					28.7675	16.8651	10.3332	32.6091	3.54992	40.626	56.9214	15.5707	25.742	6.34425	47.8281	39.8603					51.7297	35.6754	30.2541	17.8813	9.61892	30.2155	46.8656	11.5741	65.3549	38.648	35.6463	69.3179					4.72093
	17.0678	16.3246	32.0122	51.3895	18.6629	37.6845	11.754	23.4674	44.8379	40.6466	18.6267	44.6519					47.5796	13.0065	21.3553	23.6834	4.22611	52.9027	57.3736	7.97219	13.6266	12.3978	43.6206	36.377					44.8291	37.3576	30.388	11.3	9.31193	53.2453	37.2548	5.53882	70.2799	34.6893	38.5926	66.1103					6.32795
	26.4816	17.5067	31.8338	44.0177	14.3182	38.563	8.08852	32.9158	43.2293	31.0514	26.7125	55.8423					51.2167	15.2732	29.3422	21.7777	16.1763	50.9547	56.7753	16.9902	7.38031	25.1786	41.0019	29.0203					43.0027	37.9384	25.2473	5.25143	14.0806	56.787	31.6344	2.53812	62.5925	31.3195	42.0567	62.3247					14.548
	33.6734	28.7843	37.6458	37.8438	9.65961	41.4617	8.03992	34.5805	39.8798	26.7164	12.3962	55.6731					51.6318	26.2018	41.7391	15.1295	28.1016	42.7549	54.7415	50.0402	2.33989	42.5895	36.6853	24.8407					35.2721	42.682	23.2283	3.28573	17.5992	51.0297	26.2533	2.98528	59.7283	23.9623	40.3658	55.908					34.5337
	39.3319	41.6105	30.3488	31.7089	6.79886	44.9836	7.6368	39.7199	38.1222	22.9724	5.06824	48.8854					45.6776	33.7209	49.757	12.0533	38.8178	38.3314	52.0855	61.3369	11.2634	57.5011	39.8946	19.2188					32.4402	41.8723	19.2032	2.51586	19.1863	45.4249	19.457	11.7741	49.0749	14.2322	40.3763	48.5472					42.3454
	42.0412	42.1306	32.0264	20.0438	3.37833	44.8081	3.72074	45.32	38.2584	24.0558	26.6816	50.6222					50.6446	43.8494	54.03	4.56882	38.1173	33.863	49.254	63.5148	20.9453	59.6057	49.0815	12.7833					27.6557	44.8471	21.1603	1.43573	14.857	47.3487	18.0881	16.9026	46.0225	7.62624	31.7283	40.1178					44.0503
	44.8435	37.1532	27.026	14.8938	6.98287	43.4149	1.76184	44.531	35.5072	28.9047	50.4112	40.3769					49.659	46.2946	53.0748	1.88035	31.5444	27.8078	41.8963	59.743	34.6619	56.8381	57.1063	12.7972					36.4262	40.9294	18.4343	4.92322	15.7046	41.7932	14.9156	23.7399	43.7226	3.30466	17.3911	33.4221					44.2051
	47.4361	29.7611	23.5134	9.33258	21.4528	44.1045	14.824	39.0432	32.1223	34.2105	96.0799	35.0059					51.3065	42.8914	50.8857	5.29682	27.8017	21.5434	36.0181	54.2252	49.2199	50.4588	66.7423	17.1936					46.3658	42.4418	16.6538	3.64679	21.3362	39.2095	15.5628	27.4301	42.3311	1.20642	12.2256	38.0767					47.4161
	46.3258	25.4852	21.1197	6.82126	36.6847	46.0939	35.0645	35.1177	34.6297	41.0363	103.085	30.7004					53.1157	46.0611	51.7127	3.49263	24.3845	20.9384	28.0708	45.94	57.5968	42.0741	67.9637	43.2449					39.1573	45.2946	9.45437	7.72744	29.1377	42.4385	6.98643	28.2341	42.6273	7.40209	8.88532	41.7871					40.0267
	48.4535	21.1857	33.047	3.75259	62.9378	43.7485	61.0013	33.1603	35.7229	48.1803	120.939	31.7229					48.6827	38.3239	42.2468	6.40602	20.6644	25.4352	32.5351	35.7622	66.7865	32.6567	70.5776	58.0867					42.5529	42.2613	6.19475	15.5014	41.2604	30.2284	4.776	23.3467	39.6529	5.83153	1.51985	59.7634					36.1175
	44.9835	19.8068	34.7614	2.72144	75.2752	41.7398	56.9333	25.8543	38.7027	52.5323	121.961	25.7637					42.5524	35.6034	36.3514	5.51989	25.4726	36.0205	40.987	26.7086	64.1297	33.5764	62.6225	70.9688					34.9461	34.7232	3.44629	19.563	49.3303	23.8434	9.65709	18.09	41.6285	9.25401	3.99018	56.6475					33.9065
	40.1901	19.0137	41.3107	7.69809	85.9399	40.8797	85.7526	19.6273	33.2924	48.8787	101.41	22.8996					38.6068	30.2123	28.8515	4.15848	33.3585	36.0069	44.5885	18.8101	58.5135	29.0902	54.951	69.8567					26.5936	30.1108	3.35227	22.6233	45.958	17.5892	11.2687	13.464	42.2545	11.343	5.80028	56.4902					26.318
	36.4997	24.1247	37.0003	7.6067	77.8702	37.6183	70.5204	16.433	35.2663	46.2582	109.555	21.4201					33.6021	23.0743	24.6984	3.26559	39.6011	40.8755	44.2918	13.9318	51.8287	25.4481	52.6853	64.7371					20.4809	29.9937	3.4444	23.3305	40.2964	13.0443	12.6079	10.4396	36.2257	13.2558	7.55725	60.1769					24.0655
	31.6124	26.6613	33.9444	11.5885	67.772	35.4796	79.3882	13.9352	34.536	39.6252	71.3045	20.571					34.6722	17.9617	21.8419	8.19615	41.254	41.0557	39.7712	7.51792	41.2397	20.9192	46.369	57.5734					15.7121	31.2422	3.80222	25.3937	29.8172	10.6122	9.48562	7.36666	29.3067	17.413	7.36739	61.868					22.4506
	29.1317	29.1493	32.8665	10.6916	57.6274	28.7078	59.8405	9.76965	31.1468	36.9313	50.7681	21.1142					35.9009	13.9529	18.0131	19.6746	38.6596	37.1307	37.2584	3.48986	37.8598	19.7572	48.9846	47.8751					13.3317	26.6003	4.14721	25.4197	29.5828	9.94604	8.87326	4.78914	31.9138	17.4876	7.97336	60.4836					13.0611
	28.2527	27.5624	33.0374	10.8363	46.3857	21.5071	45.3487	4.72938	35.1547	36.3796	38.6853	18.9618					35.9897	11.0417	15.788	25.9419	34.8486	38.4984	34.4192	1.43967	37.2475	17.362	41.6052	36.8347					11.5045	24.1479	4.58432	22.8155	30.2856	9.71208	10.0212	3.95932	28.7236	16.8609	9.58785	53.4554					14.1691
	25.1722	25.5606	34.7065	7.70283	33.8854	18.3702	34.3427	2.57747	25.1272	35.0419	23.0638	15.1488					35.4559	7.69132	14.6033	34.0272	29.8213	36.0972	35.5262	1.60306	31.7242	19.3825	29.1019	28.8063					12.3057	21.6437	5.68619	19.2226	29.9352	11.4015	9.9687	4.01787	27.3096	18.2747	10.1175	50.2233					12.2585
	23.3891	23.3923	28.3826	6.14302	23.0307	15.0805	26.0495	1.90581	30.3845	33.1884	13.3519	9.3162					29.6683	6.21662	14.2493	34.8646	28.099	34.3628	35.002	2.32999	27.9647	19.7724	20.2981	21.3907					11.1433	20.1579	4.82753	19.2257	29.0037	12.637	11.1666	4.57033	25.7862	18.6195	9.22084	45.5031					10.2286
	19.1228	17.3163	24.1559	4.55168	14.518	12.5872	22.4999	1.55568	23.6071	31.3004	8.84353	3.60931					25.7678	8.10013	14.1811	31.1596	27.1276	33.8083	32.2723	2.65514	22.9787	14.8516	13.5174	17.6915					12.9232	16.5458	6.84599	22.5303	29.9888	16.7601	14.0928	5.99769	21.6658	18.6486	9.83685	41.0597					8.3727
	18.8484	13.3008	24.4876	3.67912	7.84303	13.6221	18.9673	2.37966	19.5815	28.7908	11.1444	1.99161					22.9856	13.3771	9.99803	30.2224	24.6504	33.0443	27.0956	3.17781	17.7317	12.8824	8.569	13.3675					17.4525	13.8776	7.2899	22.6001	27.0343	13.9057	13.1385	7.98195	15.5811	21.6992	9.72653	35.3706					9.93427
	15.314	9.13752	24.9145	2.7446	3.31731	13.2061	13.5879	3.39698	18.7622	23.6721	15.5868	4.67256					22.0291	15.5797	8.28228	31.1939	22.247	29.6621	25.0491	4.38265	15.1692	9.65102	4.78001	12.0744					16.2209	12.3635	6.89479	24.4299	23.9565	14.5526	15.7688	10.4949	12.7692	22.2189	9.00837	28.6081					7.01256
	11.9097	5.99542	24.8438	2.53039	2.64435	14.6082	12.1662	6.36388	13.7083	18.5981	20.1998	4.23125					22.4125	19.8679	9.04366	27.4645	21.982	27.6221	22.0126	4.07818	9.13035	6.94816	1.38762	6.76769					18.4342	12.9473	9.51702	21.2865	20.7865	17.283	16.5532	12.3299	10.752	23.7371	11.9135	23.6065					6.99098
	13.9125	3.61583	22.6193	2.99103	3.4182	17.2323	10.7073	6.93543	8.86452	17.2649	22.1225	3.43118					19.3707	14.4827	8.56282	27.4375	20.7701	23.1137	21.4906	2.69708	5.50908	5.71067	2.36655	8.94062					23.0131	11.7938	7.91907	21.7172	19.0917	15.5635	16.0094	13.8756	7.43692	21.0998	14.1674	18.0796					7.31261
	13.5963	1.79865	23.3283	4.59516	3.97319	15.3554	11.5578	6.24822	4.93579	16.7037	17.7134	2.523					19.938	14.5003	8.17095	29.7294	16.688	18.6564	22.501	2.30745	3.33667	3.00014	4.50293	8.70922					24.3964	11.6177	10.8903	19.5114	17.6775	15.962	15.3181	14.9926	4.77452	21.085	17.4494	13.2667					7.81912
	12.7624	0.893565	20.2968	4.33127	4.62265	18.4368	15.5911	10.7841	1.23867	12.6668	18.5316	1.89946					21.8528	13.3891	5.53766	31.993	15.1725	14.9028	19.6422	1.95524	1.6029	2.32413	4.43232	9.06499					16.0984	10.7692	12.1979	15.2841	15.9577	16.3705	16.9232	16.4565	4.96791	20.3667	18.9781	8.46353					9.74776
	10.5048	0.82118	20.5636	8.61685	5.30863	21.758	20.4021	7.04498	1.87372	7.01058	20.4408	3.25844					22.0264	19.1768	2.50409	29.8363	11.5398	18.3502	19.3246	2.2774	0.616916	2.14669	5.24127	13.9918					17.0883	11.1141	13.4361	12.5617	16.1157	15.3464	16.1914	16.5632	2.4498	20.001	18.0646	5.81285					9.1595
	6.70412	0.445263	19.201	3.62173	5.93711	25.8588	23.8314	6.19335	2.73492	6.33954	15.8142	5.0053					21.0129	16.8642	2.55988	31.0877	9.59123	18.0167	19.4999	3.79184	0.884669	3.01761	5.33372	11.1098					14.2813	8.92713	16.6145	11.0515	16.2015	16.5855	15.4684	17.6181	1.33277	21.8251	15.4369	7.59719					6.8867
	4.03233	1.13695	17.2236	3.02158	5.49255	26.4346	25.2659	4.58089	0.537495	4.62142	12.5076	4.1273					20.492	17.9651	0.430173	25.8226	8.44894	11.0119	22.2449	5.44974	2.23803	3.1084	3.66516	14.7969					11.8228	8.69715	13.4791	10.9224	16.0508	16.9155	15.7258	16.6939	0.385677	19.5461	13.8489	5.403					8.87558
	3.19781	1.52498	14.722	2.98143	7.37227	25.7609	26.0475	3.10285	4.68129	3.44419	11.0786	2.12707					15.9941	20.1797	1.25088	24.1777	9.08656	10.3004	19.8102	5.87181	2.81882	3.66663	2.68815	13.8451					7.1463	6.00449	11.2622	11.1809	19.9435	19.2672	16.7223	15.3796	0.161905	19.753	10.1351	8.01314					9.15237
	2.67366	2.0062	9.98915	2.84635	12.5703	25.9017	26.327	2.07069	5.46058	3.67118	10.7911	1.65393					15.4135	18.2737	0.70945	21.9197	5.71061	8.23764	12.5347	6.09262	1.58296	1.52795	1.19547	16.6937					6.43705	5.6655	13.0186	10.0626	19.2088	18.2648	19.205	16.9444	3.26856	18.3945	8.71555	6.92111					14.4976
	2.36673	2.06177	6.95877	2.9286	17.0375	25.2089	24.4542	3.23954	5.07624	5.60046	8.98745	0.953501					14.9527	18.9013	1.36628	21.1658	4.88405	7.95603	9.04118	7.37129	1.21677	0.998054	1.39059	19.0682					4.12696	4.26596	11.9479	11.1566	11.6877	16.4855	17.4741	14.0516	2.34692	14.5497	6.88506	9.54013					10.5532
	1.31303	0.926036	5.49142	2.32109	17.9524	23.4813	21.2361	3.95055	7.79322	6.2939	10.7505	0.752586					11.0077	18.3025	1.12668	19.1341	4.43693	6.76919	7.0518	12.7975	0.974464	0.710805	1.848	19.6505					2.25856	3.07541	9.84071	6.07093	19.9008	18.8313	18.7966	12.7019	1.71032	14.2509	5.30926	9.67448					9.84204
	1.86227	0.624964	3.26423	3.49681	18.5026	19.5732	21.1905	4.18574	10.0833	8.42238	8.49485	0.700686					20.6422	15.9103	0.196775	18.8972	2.12672	6.41548	4.5105	13.4239	0.915038	0.891717	1.80362	18.4221					0.183483	2.31185	8.44835	4.41424	12.9699	16.0304	18.6395	11.0554	1.95105	9.8741	7.09395	8.24358					6.86559
	0.869135	1.11568	0.957951	2.04586	18.0838	16.1138	22.3709	3.89629	10.3751	8.3029	9.89686	0.857353					18.2945	17.0279	0.38931	18.7633	1.04924	7.61251	3.94437	9.10168	3.2462	2.58828	2.21764	15.3778					1.35767	1.67974	7.56691	3.69812	14.5562	16.7235	13.9892	8.07496	2.29214	6.18677	6.78294	7.43123					4.48732
	0.951436	2.56584	0.441893	1.07523	22.4194	11.9641	20.2025	4.38093	10.6565	4.39155	7.82163	0.457935					19.2506	19.0933	0.5133	17.6209	1.84157	4.96425	3.59842	15.4197	4.33415	4.50951	3.95031	10.5892					2.52369	1.46255	9.34567	2.75373	11.7207	16.7842	13.6657	5.81609	1.76168	5.91953	5.03472	9.35622					3.17851
	1.74721	1.40786	3.34164	1.98761	24.2415	8.11292	18.9989	5.03685	13.0398	11.1443	10.1344	0.751496					19.1991	20.1878	0.31794	14.6211	2.87657	4.90031	2.13672	12.1505	4.61366	7.05775	4.8006	8.32172					2.07966	2.18419	8.57472	1.39355	10.389	16.8819	13.9354	2.34932	1.22977	3.13402	4.2379	12.6344					1.39031
	2.13942	1.19996	4.84207	1.22236	23.2583	6.50628	17.6952	6.13884	11.6292	6.9076	7.95872	1.43181					17.442	19.5458	0.320599	8.65876	4.61756	5.25347	1.48488	15.8206	7.95256	6.6645	6.74259	7.83929					2.23743	0.627347	8.46961	0.808805	8.48163	15.3624	14.8972	3.92439	1.10859	2.23942	4.73599	12.3565					0.899341
	1.8414	1.57066	5.82407	0.609503	21.9606	4.63857	14.4571	7.22908	14.3017	4.61948	8.41525	1.8484					17.2005	16.9178	0.69013	5.95243	3.49172	5.84702	1.28875	6.15257	6.47507	7.79603	8.49771	7.40917					4.28833	1.14782	11.0028	0.643987	6.94982	16.1082	17.0953	2.26758	0.448613	1.30358	4.94849	13.8594					2.82062
	2.57739	2.72702	6.05374	0.432063	21.1733	2.73048	11.6372	7.64066	16.1758	7.62335	9.11282	2.26021					12.3115	13.4869	0.854644	4.46288	3.21359	4.58322	1.04868	6.22583	5.79217	7.81596	8.69288	7.40738					3.53886	1.09609	10.3339	0.618338	5.36019	17.0414	16.6426	5.09229	0.554628	1.82592	6.26804	13.1597					2.60567
	2.05515	2.71629	5.62283	0.704342	18.8751	0.709151	9.20517	7.23972	18.913	5.19485	5.45277	1.21136					10.083	12.2525	1.09246	2.50362	3.29684	5.8728	1.08348	4.35485	4.64565	9.42963	8.74115	7.19067					5.59279	1.04801	9.17948	0.536401	2.92985	14.8077	18.5123	5.05587	0.369242	1.57492	9.84103	12.683					4.32442
	1.95617	2.96935	5.97794	1.55355	16.0961	0.872989	6.09872	7.21498	14.762	5.2651	5.14027	1.81991					7.94571	7.4116	1.68959	1.78424	3.59406	5.77216	1.23515	4.86125	3.79507	11.1399	9.97097	9.59205					6.06411	1.19706	9.30642	0.540465	0.887525	13.7548	20.048	4.21002	0.436935	2.03278	7.52566	13.644					5.63407
	2.78226	2.74156	4.51651	3.65595	15.9166	1.7074	2.98834	8.13376	16.6085	5.02906	4.04685	1.34712					5.7549	4.6303	2.50648	1.85216	2.52933	5.59457	2.16797	4.50269	4.5206	10.9047	9.6116	9.70732					8.78889	1.34803	12.1814	0.623185	0.292828	11.936	18.0393	4.3914	1.50516	2.36577	6.17741	11.3746					6.27686
	3.92425	2.77585	7.11419	5.65029	13.4836	2.5951	0.781539	10.2035	15.6432	5.90645	3.02308	0.912717					1.9149	4.0264	1.75628	0.17687	2.24977	5.52111	2.25241	4.48868	5.87532	13.8829	6.87947	9.79938					10.5783	1.22287	8.38287	0.670891	1.10663	8.72207	19.2726	3.48579	0.835583	2.62496	5.63197	8.34573					8.15133
	4.7134	2.95428	5.3952	7.50771	10.3561	1.81352	1.36743	14.3918	16.598	7.34052	2.62138	0.430066					1.14835	3.05308	1.87261	0.947588	1.18633	7.93737	2.33325	3.90334	7.13597	19.8911	5.81279	10.4333					10.746	0.880315	7.06577	0.676859	1.63516	8.61453	20.9031	2.97024	0.708615	2.88853	4.65	6.00259					8.7196
	3.76565	4.07716	6.40621	3.65193	7.52124	2.75638	4.05561	10.4563	17.918	8.95396	4.30534	0.88772					0.612819	3.29468	2.38666	1.77184	1.02286	6.22685	1.81596	1.6286	6.74997	20.4823	4.4408	10.4291					11.4516	1.05179	7.61346	0.387947	2.09653	7.20473	16.7015	5.41555	0.896993	4.82496	3.5174	3.15391					10.1455
	4.50021	3.55473	9.07949	3.30181	5.98389	2.49832	2.89622	8.12291	18.0923	8.42414	2.83188	0.634536					2.54888	3.58203	1.4768	3.34716	0.443396	5.52289	1.74096	2.04642	7.47699	20.1898	1.83929	11.4159					11.304	0.595888	7.29889	0.356606	1.66526	8.77687	14.6227	2.9162	0.867607	7.36526	2.35391	1.91326					16.6007
	6.10475	4.20634	9.56074	6.05655	5.90715	2.32341	2.41725	7.98791	15.8287	9.89376	1.46051	1.14133					3.5806	4.66185	1.39847	3.55828	0.349904	6.28155	1.99206	3.71462	8.40521	18.2798	1.39567	10.1321					11.7677	0.686793	6.66596	0.454695	1.63117	8.40021	15.4661	3.10743	0.606226	7.44392	1.27501	0.678524					13.4948
	4.84797	3.90443	10.4494	4.37532	5.77954	2.27647	2.59166	8.45776	15.5144	7.63211	0.597608	0.851865					10.023	4.77709	1.49422	4.23613	0.439248	5.52145	1.16443	1.23175	8.58058	18.805	0.744034	8.04223					11.9569	0.247819	4.83081	0.414338	1.32451	7.7762	14.4784	2.16147	0.680548	11.8583	0.289729	0.595665					15.0516
	4.36687	3.65025	11.0828	2.51399	8.80367	2.05976	2.67507	6.77798	12.9728	6.90719	0.425649	0.696285					3.93768	6.54495	1.26352	5.31599	0.705031	5.53438	1.98306	1.02292	9.85423	20.1606	0.698095	7.67514					10.6677	0.852035	3.67782	0.050963	0.980875	8.20233	12.282	1.78518	0.66967	12.4052	1.2273	0.861483					13.1215
	3.12876	3.71495	8.99619	1.41985	13.3811	0.996873	2.87066	4.16579	11.9137	4.97408	0.196346	0.263784					4.0746	9.00086	0.859536	4.86014	0.811582	3.69845	2.25078	1.20297	9.73088	21.3386	0.529932	5.47279					10.0345	0.474893	1.93473	0.296842	1.15343	5.03762	10.6415	0.960646	0.243758	11.1913	3.35403	2.25501					12.7048
	2.40995	2.56217	10.5472	0.753732	16.4053	0.335867	1.78424	2.63824	6.58318	3.75302	0.369237	0.568735					3.3961	9.69304	0.784109	4.38299	0.378379	2.42264	2.63612	0.891275	9.55061	20.3145	0.268269	3.8256					9.62988	3.69073	2.46565	0.840834	0.895228	3.96962	11.5932	1.04896	0.170523	9.97554	5.30846	1.59829					13.1762
	1.81253	1.95208	8.34592	1.73593	17.9304	0.979543	1.44699	2.06999	6.00019	2.83987	0.470273	1.61809					5.43687	13.5891	1.1098	5.06336	0.591995	1.3552	3.37258	0.889781	9.44822	22.1811	0.637518	2.78094					8.67338	1.54231	3.41038	0.822112	0.973372	4.11638	11.8102	0.145324	0.420529	7.61111	7.26114	1.26869					18.9151
	1.05163	1.6235	5.27433	1.17647	6.86971	1.27252	1.34746	1.26201	3.22367	2.69144	0.50932	1.25244					3.18232	13.0344	0.464889	6.18048	0.358842	1.21561	2.99378	0.413836	10.8438	21.6778	0.582681	0.914481					11.8917	0.934991	4.05261	0.281665	1.25318	4.61677	12.7782	1.71086	0.358316	7.09251	10.4249	1.38048					15.5689
	0.283286	2.66744	2.95164	1.03951	12.3545	0.779636	0.588433	2.03791	1.39888	2.55139	0.557714	0.771137					3.64931	12.9569	1.23102	3.97003	0.725924	2.68783	3.67332	2.84736	8.8798	18.4971	0.622493	2.27279					10.6502	0.688939	2.55216	0.368498	1.96758	5.25846	13.202	1.01048	0.358689	6.07303	9.33784	1.15705					16.9909
	0.926041	1.81615	2.15046	1.40598	7.3211	0.914639	0.356233	4.92542	1.04919	2.41033	0.70914	1.20348					4.18247	15.2728	2.75812	3.20492	0.621222	0.917415	2.67268	2.19889	8.90025	17.2285	0.493903	1.83169					12.4836	0.538418	2.47228	0.791949	2.12268	3.40339	9.44513	2.57428	0.211305	5.13711	10.1455	0.868679					16.0994
	1.48649	0.612251	0.911093	1.73653	7.0537	1.24071	0.247053	6.95551	2.36252	1.82703	0.836208	0.789788					2.64118	14.7215	4.32144	2.76606	0.468796	0.903739	3.5765	2.97869	7.89076	16.644	0.299993	3.79854					13.4741	0.855341	2.07111	1.16996	2.00217	2.75831	8.42684	1.64928	1.59972	6.06368	7.64024	0.686377					16.8675
	2.12184	3.70648	1.94188	0.443841	3.39501	1.40531	0.242537	7.244	4.51227	1.48511	0.828267	0.517535					4.76142	15.4817	1.81493	3.64345	0.293351	0.688284	2.83249	1.16618	6.16506	13.8813	0.148469	3.0192					15.894	1.2093	1.96038	1.36638	1.94419	1.63933	8.96426	1.38863	0.654505	5.97525	6.87579	0.395031					16.0522
	2.32915	2.02852	2.85601	1.3479	2.00452	0.827079	0.0318147	6.25293	5.34267	0.544767	2.44276	2.4304					0.244704	13.5722	1.18536	4.3449	0.556668	0.556125	3.54951	2.37525	5.3473	12.1184	0.340747	2.50855					15.3755	1.00916	2.31939	1.60945	2.09461	0.559879	6.22524	1.79296	1.37136	6.59826	7.42329	0.207194					12.8793
	2.12216	1.80782	3.42443	2.45499	0.620975	1.11204	0.157294	9.12653	5.14022	0.595035	1.8223	4.66922					1.29144	15.2437	0.271427	4.7935	0.25572	0.167445	2.13269	0.597571	4.74298	8.40823	0.290666	2.66507					13.6345	0.494819	2.97721	1.70424	1.83616	0.460419	6.58803	1.74654	1.99349	5.9579	6.2683	0.249767					12.1551
	2.46582	0.653089	3.96112	4.67675	1.38206	0.888108	0.102763	12.1004	4.92469	1.45468	1.69475	10.3944					1.52534	15.7808	0.390185	2.57859	0.172008	0.214978	4.40828	0.449123	3.69509	5.4117	0.222309	2.3311					13.2223	0.875057	4.83115	1.92222	2.45449	0.306875	8.6941	4.44159	1.85638	6.65224	4.14101	0.142595					12.53
	2.90994	0.562338	4.1123	6.06098	1.89916	1.10882	0.140473	14.3923	6.24392	2.18231	1.59754	4.89442					1.58593	17.504	0.297324	1.28741	0.301472	0.859521	4.08485	0.443229	2.12609	3.83814	0.133194	2.2432					11.4776	0.648648	3.06236	2.53674	3.90683	1.69495	5.15989	2.07277	3.0389	8.16093	2.60381	0.0571624					11.2346
	3.21288	0.245727	4.79508	9.50681	1.93804	0.77173	0.165375	9.3458	4.10391	3.44013	1.45319	3.78011					1.22672	16.7064	0.99347	2.92237	0.619574	1.19437	2.58593	0.57313	1.85384	2.3784	0.250402	2.68625					9.75978	0.311924	2.84297	3.02119	7.20135	3.04213	4.49566	1.62974	2.2444	8.10261	2.00562	0.0220627					12.0727
	3.80005	0.202302	5.28931	4.81699	3.21517	0.295099	0.411586	7.6468	4.6338	3.10633	1.89882	1.68274					1.78139	16.7701	2.34776	3.68944	0.367873	1.63005	1.06779	0.235116	3.95689	2.46958	0.162043	2.58387					9.92216	0.117406	2.69061	3.81512	7.51766	2.87647	4.27797	1.52542	2.2151	7.17986	0.693651	0.0989848					13.7618
	7.06124	0.62789	4.37997	5.74523	4.64139	0.0356168	0.259863	7.27058	4.23813	2.57014	2.1477	0.995486					1.71522	14.7946	4.41761	5.14725	0.23718	0.999791	0.34621	0.364327	2.1054	1.96928	0.135265	2.98119					10.2307	0.202831	2.45383	3.89135	5.83661	3.39977	3.58114	1.05893	1.46211	8.68273	0.949447	0.165022					14.4793
	4.99903	0.292888	3.81013	8.62427	1.60637	0.234703	0.179088	7.76638	6.18012	4.21395	4.6443	0.100102					1.94463	14.864	1.69124	4.32197	0.411723	0.968218	0.25935	0.983746	2.55643	0.83696	0.787903	3.60532					12.0769	0.140758	2.88053	4.86454	7.6648	2.59356	5.9784	0.723023	1.01808	9.45192	0.949988	0.107771					14.7115
	6.42879	1.16287	3.29521	7.94342	1.23513	1.38465	0.0652695	7.31409	7.10246	4.62305	4.63711	0.864477					1.30996	14.2401	2.01509	3.84866	0.214266	1.02084	0.486678	1.95625	3.01895	1.11474	0.281978	6.69074					10.5828	0.341349	2.29133	4.39671	4.93162	3.24632	3.51171	0.607459	0.857476	9.5706	5.07725	0.0570148					15.3222
	6.38402	0.921575	2.18246	8.31169	1.33396	1.23408	0.161049	6.70798	12.2431	3.06284	3.67815	1.17799					1.11143	15.025	1.87468	3.74328	1.13706	1.68029	0.341441	2.1064	2.60685	1.3127	0.655992	3.41487					10.0833	0.296657	1.65706	3.44539	4.48349	2.5997	2.69584	0.368885	0.982472	8.92019	2.94729	0.090999					14.6447
	3.24959	0.39753	1.03942	5.36051	1.69356	1.4802	0.0609195	7.10913	12.3792	3.13575	3.26689	1.09093					0.959744	18.0299	1.34779	2.46204	1.23644	3.0999	0.505377	2.29544	1.9238	2.17977	0.486811	1.50489					10.3222	0.247474	1.82147	2.69631	5.74949	2.85105	2.50772	0.0964504	0.396868	9.24116	6.54231	0.0549382					13.6128
	2.78072	0.234951	2.63302	3.63382	0.474169	1.8025	0.195889	7.08366	14.0878	3.01011	2.40583	0.591227					0.689954	19.6024	2.23206	1.88073	1.67774	4.09667	0.274622	2.72312	1.32845	3.15415	0.924184	2.66527					9.93391	0.205173	1.56545	1.69818	3.64668	4.24239	2.15661	0.0305833	0.111628	9.50416	3.05239	0.894218					11.4674
	3.16165	0.197829	0.70971	2.88876	3.28241	2.65605	0.100484	5.03755	12.4783	2.70018	1.45376	0.770414					0.590646	22.2607	0.936527	1.52792	0.329731	5.60046	0.171099	2.4544	1.18343	4.35636	1.13267	1.55774					10.6606	0.783123	1.31336	1.16565	3.39298	6.16662	1.22173	0.127171	0.222798	12.249	5.0198	0.883156					10.8551
	3.76427	0.38479	1.2765	2.60368	1.05553	3.18034	0.0531205	4.20473	13.4461	4.34695	1.34783	1.02296					0.36773	17.9882	1.69789	1.15557	0.86206	6.28466	0.382596	2.37602	0.748378	4.40923	0.830436	5.53523					10.0272	1.26268	1.46444	2.25802	2.23563	6.2346	0.655634	0.103014	0.205897	14.1447	2.65044	1.31688					8.34863
	4.39846	1.12516	1.92816	4.3162	3.73285	4.58796	0.18696	3.54656	11.6572	4.07157	0.6255	3.37715					0.307656	18.1787	3.57223	0.752527	0.717341	4.87028	0.696324	2.46285	0.780285	7.303	0.972705	1.84621					10.853	0.973638	1.06667	3.01031	2.44215	7.36414	2.67914	0.157616	0.218319	15.4209	1.87251	3.03919					7.13331
	5.08785	2.4315	0.546246	4.23301	4.40105	5.87901	0.0162914	3.75149	10.1277	5.89377	0.330894	1.45583					0.554407	16.9617	3.87864	0.345345	1.10076	5.31954	0.399763	2.45794	0.542452	8.71404	0.690443	0.375702					9.8863	1.02381	0.776778	3.85955	1.84676	6.72388	0.797911	0.149569	0.662153	17.9598	1.56315	1.86394					5.66498
	7.04204	3.21103	0.282755	4.54765	5.20173	6.24781	0.200154	3.4355	11.3773	6.73519	0.270545	0.747749					0.397397	15.7793	2.26513	0.0892416	0.695809	4.09617	0.13658	2.94704	0.0880773	6.85176	0.380176	2.14307					9.34831	0.685793	0.121008	3.65475	1.53435	4.77955	1.05857	0.168991	1.43691	19.2095	1.96463	2.23321					4.29632
	8.51699	3.20717	0.260845	3.70769	5.17631	5.49254	0.151473	4.69634	11.6254	9.04709	2.66978	0.789294					1.09855	13.7768	1.68187	0.331221	0.854084	4.50066	0.409699	3.16645	0.433374	5.36065	0.960577	2.69474					9.0958	0.555469	0.193518	5.43043	1.0391	6.08385	2.04424	0.123535	0.863609	19.0691	1.17594	1.99793					2.87802
	8.34372	5.03608	2.0759	2.33948	5.29471	9.64816	0.18528	6.61894	12.668	10.11	1.34036	0.901775					0.79316	11.1045	1.23876	0.822794	0.449197	3.52942	0.315346	3.64159	0.213381	4.35083	0.536545	3.55701					7.90941	0.266385	0.139105	4.3807	0.771454	6.69894	0.695997	0.0875851	0.558659	19.7298	1.40228	1.40292					1.77269
	10.4493	5.38928	1.4871	2.31512	3.17175	7.78354	0.0632426	8.59884	16.0407	12.3734	0.572695	2.21313					1.08942	10.6159	0.64193	1.31938	0.387621	2.67605	1.31929	4.64734	0.297575	4.7452	0.0518328	3.28055					7.9929	0.445387	0.269786	3.86365	0.385949	5.82153	1.8878	3.88159	0.633002	20.9776	1.36575	1.86436					1.06582
	13.0707	5.58241	0.950708	3.02388	3.67212	6.80619	1.30088	10.528	15.1327	8.74315	0.550578	2.25294					1.16474	7.21436	0.329317	3.12259	0.368004	2.23504	0.854888	4.89737	0.0975065	4.69386	0.164295	2.54742					9.54474	0.11114	0.198399	4.04072	1.5432	4.7577	3.28045	2.88834	0.235876	20.1323	3.08731	1.7914					1.09388
	11.0555	5.08592	0.375463	3.48746	2.6906	5.82254	3.16187	8.88594	13.7725	7.13108	2.95724	1.80281					2.13123	3.38378	0.0345273	3.57551	0.665598	1.79836	0.646233	6.78018	0.0856906	5.43083	0.345779	3.96972					7.16842	0.227649	0.358202	5.6132	5.34009	4.32704	1.50004	2.09695	0.244629	18.3279	2.73191	1.5698					0.799759
	8.95345	5.7427	0.752101	3.81097	2.04057	4.40101	2.28351	11.0398	12.4321	5.52391	2.14667	1.21124					1.99025	1.84667	0.620749	3.37854	0.901162	1.96785	0.541002	6.35182	0.320958	5.49715	0.856702	4.92574					7.21617	0.338735	0.153268	4.55393	6.80171	4.69461	1.59121	2.01656	0.164034	16.3024	1.59334	0.754243					0.667756
	6.48369	4.90379	0.441794	2.75335	3.2129	2.37695	3.30416	11.7034	9.84976	4.80169	3.82208	1.19068					2.52325	0.820175	0.919183	3.63837	0.455522	2.06115	0.539437	7.38961	0.268773	5.22104	0.973002	6.62251					6.90967	0.194299	0.463426	3.4441	6.50611	5.05255	2.36412	1.73863	0.0431567	14.7689	1.50075	0.959424					1.13514
	3.62211	3.76963	0.285883	2.50182	3.81358	0.36481	2.66758	14.0367	9.23258	3.33025	5.80148	1.02679					2.92199	1.29216	0.721097	3.30504	0.395766	1.12744	1.17176	13.8573	0.256192	4.92761	0.711304	5.03028					8.54297	0.576864	0.659696	5.99242	8.85765	4.84266	0.613486	2.67717	0.0466527	14.8334	0.711917	1.23597					1.25966
	3.27104	5.22364	0.178705	2.18165	2.37373	2.5057	4.52338	15.7015	9.06359	1.08764	8.2219	0.740859					2.99364	0.988091	0.329533	4.91403	0.477607	1.19581	1.04293	8.8505	0.381692	6.55109	0.717377	6.12559					1.9728	0.214429	0.324543	1.70867	8.52516	5.2738	1.924	1.65274	0.12165	14.6085	0.284656	1.36254					0.506939
	1.94193	7.32764	0.162586	1.18011	2.70115	0.190574	3.02127	17.8014	3.32121	0.56698	5.64179	0.260211					3.22001	2.33618	0.19416	4.7987	0.925713	1.65186	0.745455	8.96413	0.620455	10.901	0.730635	8.26805					12.0624	0.36248	0.576433	0.737822	9.3044	3.53104	0.838238	1.52619	0.81452	14.6161	1.12231	1.29206					0.587902
	4.98772	9.79277	0.240642	0.726115	3.8764	1.38098	3.61432	17.4804	5.00659	1.29318	4.64296	1.20788					6.20341	1.23519	0.94198	5.67687	0.818706	0.881595	1.31683	9.41405	1.86976	9.2211	0.689051	7.52988					7.03844	0.318534	0.120798	2.23878	6.25348	1.51354	0.867212	1.19397	1.61315	14.823	1.48013	1.66749					0.820515
	3.72362	13.084	0.273809	0.413558	3.52192	1.6909	6.4958	16.8007	2.67192	2.71949	4.30353	1.30292					2.00094	3.11358	1.4991	5.04598	0.608406	0.440589	0.651555	7.5698	1.53298	9.29033	0.439732	8.77708					6.94513	0.387027	0.121829	4.41551	5.46188	0.9247	1.67912	0.982986	0.444335	14.1698	0.829797	1.2634					0.988146
	3.75836	16.4885	0.317119	0.579999	1.94659	2.33544	3.24892	14.9392	1.74441	4.61349	3.43176	0.72244					5.46882	2.28823	1.3252	4.77658	0.523216	0.45302	0.729906	6.36592	1.62282	7.66153	0.511575	7.4575					7.79224	0.206292	0.28548	3.61143	4.22522	0.892236	1.32518	0.814348	1.25435	14.2231	0.78722	1.36913					1.69223
	5.63949	17.7084	0.146122	0.391242	1.94493	4.65444	6.64314	14.0659	7.26763	4.09744	2.54247	1.29792					5.20665	2.66169	0.545198	4.68748	0.395221	0.379715	0.55784	7.49681	1.69073	8.6078	0.495899	9.0981					9.40951	0.0790521	0.121577	2.44195	6.05767	0.997186	0.304955	0.527339	0.844138	13.9498	0.671595	1.39128					1.55632
	7.053	14.818	0.203248	0.132395	2.64067	3.30513	5.4018	14.1688	3.40954	4.84069	1.9376	1.30715					5.27331	2.4085	0.138447	4.36858	0.10495	0.431791	0.59939	5.16041	1.34611	9.56361	0.322132	10.7768					8.23015	0.164501	0.308506	2.31313	4.71755	3.19762	0.301688	0.359241	0.370643	14.9041	0.802889	1.01708					1.08122
	6.76514	13.4905	0.26207	1.9581	1.36466	5.62537	5.87474	14.6011	3.47589	5.85883	0.877373	0.645944					6.3287	2.99608	0.0687561	11.5178	0.550003	0.272257	0.658687	3.40148	1.77981	10.7293	0.20565	10.7885					9.92841	0.261736	0.680587	1.72005	3.38518	2.67505	1.70425	0.106552	0.559802	15.4926	1.68431	0.876841					0.85158
	5.45712	12.9021	1.68393	3.50408	0.960477	6.44173	7.84578	13.7063	3.7536	7.75801	0.757743	0.449656					4.89184	3.79465	0.123349	6.96255	1.24407	0.710756	0.31663	2.72113	2.76714	13.3822	0.447017	13.3434					8.90862	0.278156	1.31191	2.34105	2.11568	2.04027	1.47229	0.592437	1.69957	14.4178	3.02957	0.785496					0.799471
	4.46518	15.244	3.31278	2.23455	2.81878	8.01745	9.17482	14.2422	4.87874	8.72266	1.78725	0.275276					3.77216	4.88779	0.22099	6.82776	0.973742	0.602727	0.571173	2.38448	3.52591	13.1107	0.306893	12.1924					10.5085	0.757343	1.37621	0.647774	2.24468	2.12529	0.755675	0.89683	0.784575	14.4114	3.47049	0.668352					0.913336
	5.51612	16.8196	2.49477	3.14478	4.25843	6.89273	6.02581	15.5143	5.77888	9.10586	3.07553	2.657					3.84175	6.25193	0.0795537	5.53619	1.73774	1.56922	0.285468	2.08418	1.94442	11.1563	0.215038	11.416					9.02768	0.931327	0.921057	0.572777	2.16478	2.59903	0.945541	1.42791	1.10946	15.1459	3.9969	0.341547					0.647933
	9.48676	18.2069	2.56315	4.96636	5.49589	9.518	5.6171	16.7807	6.65566	8.15148	2.27774	1.1521					2.49416	7.29622	0.14192	2.70912	1.86084	0.978138	0.185604	2.31463	1.97575	8.18567	0.211813	17.5035					9.32746	0.96361	0.720042	1.1047	3.08429	5.06553	1.40235	1.91844	3.63156	17.0626	4.29255	0.396813					0.325483
	7.7238	19.9489	3.34628	6.86879	6.57313	7.59349	5.86482	16.748	5.70208	7.68228	5.10787	1.96019					2.49125	6.92374	0.0959215	1.96409	1.33917	1.79398	0.732294	2.75737	2.4294	5.30663	0.0786258	12.0179					9.66017	0.878859	0.495719	2.47881	0.95565	3.74392	0.254366	2.37175	1.38323	18.6199	5.49917	0.27627					0.276074
	11.3872	21.98	5.71661	9.34563	5.9967	6.99855	8.67587	14.272	8.00495	10.3122	4.31152	1.57879					6.85648	6.23205	0.105823	1.24367	1.32663	0.737305	0.627163	3.7988	1.97677	3.82383	0.230513	10.2138					8.75403	0.879305	0.518321	2.38957	2.05547	3.06867	0.145474	2.55845	0.980231	17.2295	4.89437	0.174276					0.250394
	15.2356	20.0707	8.50302	14.0872	6.08408	4.67896	4.75684	14.8217	8.28127	9.55766	6.71687	0.323247					1.03366	1.65342	0.0591966	0.304137	1.44618	0.881274	0.163121	4.56983	1.72252	2.30311	0.150752	7.48861					7.47672	1.23419	0.795284	5.21433	1.39672	5.81136	0.762355	2.10453	1.02467	17.3569	4.52203	0.156696					0.211
	16.3605	20.904	10.7215	14.4244	6.02187	3.95882	4.80209	12.613	10.3992	12.2162	5.01404	0.319361					5.20809	0.587513	0.267254	0.286037	1.47836	0.835524	0.249763	5.06238	1.35491	1.62825	0.172065	3.53988					6.68624	1.04522	0.835044	3.48377	1.60945	4.30317	0.920085	1.71251	1.03709	14.2954	2.69227	0.18202					0.359229
	16.698	21.3925	11.9378	15.8401	7.27252	3.91496	4.82113	10.3503	11.2381	10.6758	4.52329	1.45544					1.97916	0.872516	0.197583	0.485508	1.03173	1.29823	0.264266	5.21412	0.987049	0.403666	0.0509672	1.02557					6.59777	1.6693	1.31995	3.40493	1.24549	5.88607	0.792115	1.75647	1.71626	11.6339	4.87645	0.899375					0.320834
	16.8405	20.0578	11.5979	17.8684	8.20707	3.61186	4.23078	7.79686	14.1864	8.4764	4.83717	0.690087					0.51697	1.88966	0.111646	0.651472	1.13112	1.48122	0.189006	4.17674	0.710652	0.601288	0.175904	2.17678					4.02665	1.30425	0.957509	4.19634	0.51386	5.68883	1.08713	2.10884	1.34788	11.7053	3.18255	0.647007					0.13331
	16.8514	21.2618	13.7031	19.3174	7.8321	3.42893	4.45511	5.26493	11.0337	8.47683	5.79149	1.84776					3.41009	1.24944	0.0183815	0.759224	1.29807	1.80411	0.440311	2.92057	0.616162	1.29752	0.336641	12.1853					3.46401	1.37946	1.13728	2.93101	0.683876	3.48197	1.78466	2.06081	1.34486	9.44687	3.13551	0.145405					0.224822
	13.0705	22.7535	13.8478	17.138	8.98962	3.93514	3.62391	3.44645	12.1061	8.52934	7.21319	0.729793					0.718676	1.26225	0.161677	0.811021	1.7856	1.14447	1.02947	1.67085	0.312136	2.02451	0.0993129	5.93326					3.05979	1.29159	1.09252	3.09973	0.651457	1.62214	1.03194	1.94052	1.93114	6.81639	4.65745	0.836017					0.414784
	11.8774	25.6477	14.8454	16.1246	8.21912	3.87982	4.14936	2.58404	10.9941	5.77906	8.1215	0.439046					1.73717	1.68364	0.347935	0.883768	0.874177	0.971159	0.38675	1.4147	0.80145	0.920819	0.0443569	5.93047					2.6911	1.40975	0.676767	2.85323	0.84136	0.810407	1.58789	1.85155	4.22652	4.82642	6.57016	0.112171					0.39305
	10.249	23.1591	14.5725	14.8821	7.18916	6.13765	5.62951	1.47878	11.3154	5.06829	8.87893	0.778329					1.28255	1.84321	0.509991	1.05032	1.10038	1.23383	0.476589	1.52328	1.05792	0.599282	0.103252	6.89576					2.32828	1.29981	0.562833	2.8401	1.57197	0.407469	0.250193	1.65805	5.2319	3.14869	5.80092	0.204513					0.0723306
	9.12995	20.6706	15.6337	14.3946	5.20155	2.79893	4.85086	2.56288	11.2759	0.559598	11.2911	0.683011					0.204035	2.3296	0.924183	1.71025	2.01664	1.31177	0.713794	2.24782	0.537026	0.913976	0.0397309	6.99982					2.01	1.69228	0.527684	1.83547	1.15268	0.296582	1.09144	1.74327	5.33316	1.75413	5.61428	0.619984					0.192826
	8.36184	18.0447	16.7129	16.0044	6.42531	2.41437	4.04095	4.8508	9.1626	2.99295	13.3675	0.77499					0.418822	1.94035	0.958738	4.29699	1.68412	0.878076	0.89283	1.81181	0.263434	0.938963	0.177429	9.57377					2.6085	3.11761	0.350551	1.19402	1.07311	0.844369	1.25064	1.5166	5.98985	1.71032	5.66049	0.187201					0.553706
	8.55441	13.7902	17.987	15.6428	5.03312	1.81981	2.20892	5.99887	9.43349	0.533516	11.6696	1.24398					0.482041	3.23012	1.35768	12.2839	1.91404	0.597688	0.74444	1.67073	0.164607	0.248835	0.192411	10.1259					0.677636	1.41298	0.109381	1.53781	0.90004	0.677819	0.846302	1.48112	6.06248	1.87392	5.87993	0.113496					0.720402
	10.3271	11.4446	20.156	14.2879	5.45368	1.77891	1.58999	7.16571	9.1422	1.75501	10.8053	1.05874					0.226962	2.70757	2.30451	10.5494	2.31811	0.66603	0.781541	1.28874	0.498575	0.270801	0.0957362	8.21267					0.603707	1.79537	0.130461	1.3661	1.23491	0.857411	1.32768	1.34824	5.95338	1.77561	5.68425	0.543638					0.513179
	10.4889	9.63411	17.8682	12.864	2.81069	3.21415	1.38894	6.254	10.4199	0.531686	9.89715	0.68168					0.293033	2.57876	3.40105	10.5278	2.4597	0.577151	0.929256	0.988651	0.307229	0.614617	0.237621	10.6938					0.762321	0.552429	0.203317	0.98755	1.2521	0.308102	1.51716	1.25953	4.95919	1.92409	5.48538	0.0793787					0.263621
	11.2926	8.40401	16.0205	10.8191	0.748463	5.67073	1.41136	8.30456	12.4481	0.456257	10.3145	0.800715					0.420231	0.479636	3.22554	10.0353	2.07065	0.233132	0.806416	0.766064	0.326338	0.252785	0.487226	11.2748					2.03944	1.64459	0.0718653	2.7146	1.51893	0.423447	1.68695	1.41981	4.27522	2.26045	4.92981	0.161889					0.256919
	12.548	9.07825	15.0401	10.353	1.90899	2.29143	1.91428	8.00204	13.1664	1.40469	9.40923	1.18515					0.606574	3.12546	3.63441	10.2994	1.5154	0.328871	0.78058	1.24704	0.271162	0.344641	1.05874	5.2487					1.79643	1.64093	0.776034	0.884557	1.20881	0.216177	2.10663	2.13669	3.46372	0.957842	6.25073	0.030459					0.0570037
	8.39499	10.0388	12.4766	10.6756	1.3669	5.03712	1.00375	10.7119	16.8103	1.34029	8.44707	1.23355					0.221114	2.2646	4.81144	11.0324	1.04646	0.103409	0.752974	1.31781	0.274921	1.00157	0.751605	4.212					2.71989	1.22293	0.970932	1.15806	0.834773	1.19442	2.44188	1.05813	3.08168	0.416301	4.21179	0.0938644					0.722708
	8.74824	10.2355	10.3875	11.1017	1.42226	9.14399	3.46541	11.2506	14.193	0.385529	8.0549	1.27235					0.144297	2.84017	5.94198	7.34726	0.300916	0.0763924	0.594585	0.47684	0.523616	2.8078	0.983642	5.71894					3.78166	6.5215	1.73151	2.38353	0.61447	0.636135	2.7088	1.39487	3.17109	1.05236	3.19442	0.0838817					0.46392
	12.4673	11.327	8.18254	11.7364	1.17964	3.41049	6.02697	10.7261	18.2032	0.67877	7.98065	0.950468					0.180457	4.12177	4.12562	5.90009	0.954602	0.470423	0.622253	0.643884	1.66094	2.91564	1.20218	3.58628					11.6433	5.70546	2.04274	2.81372	1.02469	0.905673	3.62684	1.36375	3.89366	0.66216	2.37744	0.0654742					0.408848
	12.8159	12.8982	6.54624	13.2841	1.04603	2.52845	5.84872	12.5811	12.187	0.321408	8.2219	0.865817					0.0648703	7.44509	3.49359	5.06184	0.6186	0.780747	0.436593	0.40666	1.6557	1.82084	1.32023	2.09654					5.94403	0.60606	1.86319	1.92328	1.66133	0.458422	2.66678	0.98814	3.18639	0.853424	1.92021	0.0750049					0.339307
	11.4157	9.80131	3.18597	13.0935	1.38634	0.713224	5.5146	10.9408	10.9334	1.78173	7.37296	0.943031					0.349566	6.41203	2.58139	3.84002	0.816105	0.885743	0.322062	0.109741	1.12586	2.13859	1.60171	0.966694					6.103	0.858382	1.67703	1.98742	0.864079	0.186279	2.81691	1.19406	2.80387	0.748469	1.21171	0.460238					0.255755
	14.1744	10.0768	1.66839	10.5682	1.86768	3.28473	6.13108	12.8918	12.6212	0.224296	7.24467	1.0686					0.626818	8.44721	2.30478	3.34388	1.05225	1.98264	0.331974	0.285452	0.729703	1.85653	1.09008	1.2408					7.64243	1.14018	2.35102	1.64634	0.803428	0.298739	3.34987	1.17309	2.4346	2.56535	0.600662	0.305096					0.116592
	13.1556	7.68724	1.23493	8.77555	2.0361	3.15565	5.07109	10.8089	6.55492	0.905173	8.03562	1.95072					0.445541	10.2504	2.92132	5.15	1.5651	2.01062	0.264735	0.483194	0.427439	2.16534	1.29518	1.24194					5.38019	0.486167	3.38239	1.42039	0.353284	0.109856	2.26283	1.31935	2.41542	2.2916	0.729149	0.844343					0.223752
	13.7875	6.25262	2.87632	5.23557	3.64856	3.40674	4.82089	13.4136	3.85893	0.235022	8.23593	2.88037					0.633129	9.68489	1.95432	2.8399	1.93049	1.70895	0.274313	0.410673	0.433418	2.56628	1.31825	2.23402					4.57544	0.412718	3.88354	1.45606	1.21278	0.361814	0.785838	1.35762	4.21213	2.83341	0.368834	2.39244					0.162045
	14.4263	6.83339	3.35327	3.51603	5.20294	2.45634	5.95008	10.1917	4.9389	0.552612	8.32748	2.36394					0.865838	6.5069	6.01896	2.75579	2.14784	2.2233	0.221523	0.399983	1.21564	3.53039	0.864498	2.52348					3.81983	1.14995	4.37059	1.02463	1.93318	0.297806	0.983962	1.55021	4.19848	1.31799	0.602038	2.01415					0.0348951
	14.1392	6.67903	3.47969	2.16631	6.04465	4.25706	5.83233	9.92808	3.84466	1.05326	7.76647	2.49976					0.725864	5.04442	3.06537	2.60123	2.94385	1.36193	0.0579514	0.354185	1.35175	4.2773	0.443439	2.59648					2.58877	0.695538	4.14241	0.918749	2.05	0.237373	0.468333	1.44147	4.39524	1.66976	0.657786	3.45699					0.191317
	14.0717	6.72192	4.51802	1.68465	8.02958	5.01556	6.49961	7.47239	4.76827	0.592348	7.24847	3.14848					0.966649	5.15437	2.58577	1.37979	2.80894	0.445004	0.22033	0.229455	10.7052	5.13295	0.450434	3.23501					2.41069	1.02064	5.00787	0.824049	1.53976	0.286127	1.94336	1.71341	4.67588	1.94744	1.12751	1.87981					0.151764
	9.78589	5.97405	2.75459	0.907461	10.1402	3.69017	6.88072	8.05132	5.88164	0.468553	5.84734	5.003					3.04831	4.38303	2.51781	0.463827	4.15933	0.459794	0.415212	0.265316	4.21954	7.18849	1.87553	2.93431					2.24248	1.32613	3.90267	0.557227	1.35813	0.263487	0.851091	1.65798	6.51538	0.394212	0.662793	1.29909					0.340307
	5.49695	5.32423	1.98644	0.717501	9.42245	3.86109	10.3941	3.94844	10.7784	0.541849	5.16706	5.42131					0.528919	3.106	1.80601	0.374902	4.69461	0.457813	0.548017	0.0924524	4.07808	6.46253	2.11667	2.22922					1.70605	1.09443	3.02899	0.510809	1.23211	0.0512663	0.433363	1.64391	5.40223	0.646687	0.48116	0.962665					0.113202
	7.32195	3.7721	5.17375	1.43423	10.4219	3.28418	8.72874	2.8493	12.223	3.19462	3.84337	4.97863					0.881358	2.12204	1.57218	0.26433	6.81377	1.07253	0.37407	0.257973	3.82913	8.2265	2.86935	3.16134					1.41019	1.31038	2.99273	1.34521	1.01356	0.318299	0.457121	1.97586	4.65901	0.939355	0.745673	1.08248					0.302721
	3.88666	2.43505	4.90027	1.84988	9.86104	3.18647	12.3868	2.53926	13.894	4.3648	2.56865	6.38925					0.781685	1.97658	1.59813	0.561224	3.64269	1.4922	0.549415	0.148519	2.88593	7.333	3.11315	1.94338					1.37304	2.40164	2.23609	0.928728	0.777879	0.0827761	0.433655	1.55617	3.93882	0.483763	0.769111	1.22335					0.174237
	1.74875	2.69153	3.90745	1.93883	13.7102	3.63105	11.7453	1.70501	20.012	3.10746	1.93702	3.96173					0.562376	2.04668	1.40774	0.680382	4.09387	1.47083	0.645434	0.108972	2.21594	7.07324	3.19538	1.3975					1.12217	7.97392	2.67555	1.13258	0.55079	0.298145	0.206225	1.05991	3.0582	4.42912	0.803773	1.26576					0.263211
	2.1207	3.21842	3.66786	3.04938	11.9808	4.17991	12.0444	0.839726	16.6573	1.63818	1.38772	2.75727					0.420457	1.7898	1.4394	0.909154	0.403668	1.23255	0.594507	0.2938	1.63833	4.58005	4.10271	2.21316					1.44482	2.4944	2.5207	2.32306	0.547529	0.565864	0.249373	1.05186	2.21884	1.3584	0.647122	1.37361					0.130884
	1.56067	2.5825	3.63192	3.37505	8.61946	10.0214	10.1749	0.593668	13.4306	0.592049	1.13501	2.99249					1.04368	1.0632	1.08908	0.913566	1.68138	0.862823	0.455611	0.024557	2.29235	1.67253	4.47436	1.6158					0.593994	2.97093	2.61044	2.63172	0.515094	1.06272	0.319266	2.84795	1.6085	3.24781	0.573721	4.30642					0.226343
	0.292282	1.27787	2.73415	3.51105	6.38395	7.90276	14.0974	0.143103	12.0405	0.835772	1.21356	4.15355					0.853741	1.14316	1.04586	1.01584	1.57486	1.00291	0.422091	0.1625	5.30962	2.46871	6.40084	3.47896					0.364069	2.50461	2.54286	1.88443	0.362381	1.87486	1.04364	2.12903	1.20488	3.9847	0.551135	2.04289					0.118258
	0.250966	7.28584	2.09001	2.61495	4.76466	8.8754	11.3642	0.322512	11.0399	0.574377	0.74074	3.78367					0.842868	2.10374	0.888798	0.970697	1.82348	1.21695	0.244408	0.180845	3.48531	2.79547	9.06988	1.55637					0.203237	1.98535	1.72409	2.05567	0.517808	3.63395	1.46527	1.79488	0.343474	4.37964	1.0524	1.8029					0.251222
	0.851435	7.48929	0.81374	1.78984	3.93618	10.1116	9.03233	0.678057	10.7332	0.167264	0.844858	3.56845					0.575276	2.63416	1.1222	2.25984	1.76336	1.19641	0.606934	0.133695	3.02206	2.19658	6.93612	1.90183					0.211465	7.3963	0.7471	2.64049	0.425924	2.46855	2.52523	1.3987	0.352352	4.56443	0.0663556	1.15832					0.100026
	2.12788	7.03032	0.614095	0.952974	2.11623	10.4118	6.71428	0.991145	13.0653	1.12828	0.462212	4.14678					0.675332	3.39628	0.750091	2.94886	2.47776	2.20416	2.95565	0.403696	3.49676	1.79501	10.1805	0.73916					0.406899	2.48071	0.714143	2.27555	1.29851	1.81958	1.94335	0.814282	0.293988	5.09704	1.62445	0.862679					0.0214777
	0.898135	10.1353	1.42401	0.430036	2.23138	11.661	6.33203	0.915601	11.6176	0.644316	0.421779	5.68158					0.979119	4.09029	0.965395	2.30216	2.16721	2.02984	1.03397	0.228614	3.46091	2.4498	9.86716	1.99281					0.978057	1.43883	0.62147	2.67217	1.77549	1.96961	1.0678	0.587874	0.461351	5.88483	1.80729	0.643469					0.0374283
	0.560838	9.02698	1.81781	0.71714	2.38078	10.7999	6.78904	0.784174	8.14339	0.883631	0.525067	4.72287					2.1116	2.78182	3.03494	4.28263	2.43439	1.65263	4.01657	0.562026	2.79043	3.05072	1.45108	5.43087					0.629954	1.40062	1.04008	2.57319	1.36288	2.23233	3.06141	0.646957	0.321096	5.48824	2.21081	0.562527					0.033714
	0.250971	9.26051	3.42445	1.23372	3.51774	7.96617	6.71698	0.600116	5.06374	0.854184	0.8575	4.50165					1.29607	4.02597	1.05163	2.55455	3.07683	1.71186	2.30075	1.38298	2.38365	2.88816	3.23815	4.94173					0.339274	1.08811	1.3698	2.61073	1.33638	2.08663	1.81065	0.535982	0.344053	3.55816	1.59046	0.686689					0.0676978
	1.11806	8.60973	1.77922	3.98142	5.06083	8.32967	8.33214	0.370042	2.4061	3.09904	2.05532	5.59271					0.908617	2.77201	0.867397	2.4204	2.16575	2.19397	2.7555	1.35519	1.94878	4.90555	2.47017	9.9962					0.751234	1.18823	2.04824	2.14152	1.87267	2.21577	1.89009	0.581079	1.23953	3.47972	0.765243	0.125884					0.108913
	1.09255	8.64809	0.978988	2.27024	4.35555	7.8437	6.6349	0.277747	0.939478	1.08037	3.99638	3.12441					0.781692	2.6337	0.646911	2.26416	1.77425	1.06594	2.97308	1.21703	1.10727	3.77655	2.46797	8.68068					1.25247	0.726567	2.80096	1.77811	1.2263	1.6319	0.854457	0.753727	1.11219	2.90921	0.68154	0.627608					0.0199202
	0.78366	7.40717	0.75507	2.27345	5.25261	6.76545	6.55754	0.175498	0.93635	1.46836	4.04622	2.53282					0.563132	3.14571	0.427924	1.99484	1.91002	0.883401	3.13211	1.41541	0.460376	2.50189	2.19387	7.39217					1.37592	0.817987	3.42392	1.72461	1.45963	1.6005	1.19493	0.686802	1.52651	3.10246	1.24036	0.929209					0.188637
	2.07652	7.89739	1.65515	1.88027	8.55666	6.01552	5.97072	0.207754	0.604944	2.68198	3.39849	0.71873					0.119001	3.10162	2.18474	1.36141	2.43391	1.47815	2.17032	1.56588	9.29916	2.73156	5.43746	6.28175					1.33482	0.631745	4.05417	2.19487	1.65484	2.53699	1.36096	0.465561	1.94301	3.08106	2.39821	0.810011					0.0771885
	1.51502	9.67799	1.73524	1.08615	5.90676	4.68687	6.09391	0.212591	3.36579	6.5318	3.48346	0.592934					0.212421	4.19716	0.63614	0.970462	3.15695	0.213237	3.97396	2.63746	3.2226	2.62147	1.89673	5.59434					1.39949	0.941834	4.55024	2.06584	1.55177	2.17631	0.748665	0.423111	2.14207	2.38855	4.32159	0.707504					0.177089
	1.20757	10.1	1.79729	3.47917	7.08413	6.27199	5.85263	0.524038	4.40594	6.99917	3.3067	1.23163					0.293729	5.00521	1.99631	0.878754	2.93317	1.59738	4.77571	2.17792	3.32354	2.03598	1.63268	4.66482					0.475594	2.34612	5.21983	1.36801	2.04033	2.69165	0.58173	0.261054	2.41538	2.17861	2.92751	0.494429					0.105343
	1.45943	10.9854	2.67568	1.39331	9.22161	3.73084	4.59395	0.727225	4.05027	8.94135	3.00854	3.96859					2.53518	3.42779	2.36719	0.375786	3.14675	1.10108	5.43035	2.18804	2.86631	4.55192	0.818799	2.1092					0.864872	1.18395	6.15827	0.620709	2.16378	2.28778	0.738313	0.245042	3.1342	2.67478	2.31302	0.386054					0.0341946
	1.63616	10.9922	4.96884	1.95564	9.09011	1.94679	5.61376	0.364025	4.18044	6.11361	2.13893	3.92322					0.977954	3.2199	1.8491	0.873589	2.0905	1.16491	2.97502	1.66708	2.42731	2.82952	0.918485	1.04571					0.251956	1.11266	5.62175	0.623267	2.74324	2.02747	0.253536	0.116233	2.47566	1.90497	2.04989	0.0350725					0.047758
	2.1216	12.1228	2.80987	4.41901	9.38244	2.26971	3.92231	0.266325	3.46111	5.37723	2.58762	2.6446					1.89611	3.23158	0.315168	1.07848	1.54725	0.415521	2.22576	1.16648	2.12236	2.43035	1.15596	0.706011					0.76423	1.48097	7.03588	2.08192	1.51902	2.12251	1.01627	0.32195	4.74232	2.0511	4.38514	0.407697					0.0456741
	1.93331	11.2514	3.34929	2.57711	9.45489	2.14849	2.82044	0.109978	4.03235	3.89364	5.77903	2.13923					0.708244	3.74263	2.30943	0.969742	0.663688	3.32444	3.3054	0.816251	1.87645	1.16167	1.13736	0.692641					1.7197	1.81916	6.6671	2.55233	0.757946	2.18075	0.446335	0.0456017	3.2066	0.864115	5.01955	1.00248					0.068081
	4.55697	13.9682	3.41941	2.0702	6.71348	1.98192	2.14856	0.176248	4.93875	0.965312	4.32369	1.67726					1.44443	4.23624	0.831501	0.636754	3.46139	7.16212	1.28781	3.44008	1.50802	0.224537	0.880882	7.2231					1.36822	1.76812	6.82224	2.02775	1.20213	2.73961	0.818087	0.235511	2.85594	0.250364	5.27402	1.25797					0.732237
	6.56267	15.1498	3.46471	4.04654	5.02376	2.09617	2.04692	0.52271	4.73052	1.03544	5.08767	1.24273					1.48102	4.31481	0.609691	0.827617	0.309451	9.8484	1.40092	6.22117	1.42167	0.452647	0.801534	4.8553					0.87048	1.10305	7.42775	1.26529	0.994093	1.91071	0.939571	0.0799797	2.74287	0.595779	4.69641	1.26708					1.22297
	8.32045	16.2104	3.06223	3.75143	4.4336	2.33752	2.34856	0.377626	4.94865	0.469512	5.70679	1.30787					1.8393	4.87191	0.710985	1.58926	0.54328	9.02484	1.45563	4.90662	1.86332	1.62162	0.989343	5.6696					0.595007	1.09596	8.70877	0.754607	0.898677	1.71628	0.668121	0.142029	2.82822	0.332458	4.86251	1.63677					1.24676
	9.33982	17.7199	5.58067	3.73261	1.97822	4.37115	1.09726	0.26956	6.89122	1.70847	8.76071	1.87484					1.42942	8.75505	0.821973	0.913112	1.45227	8.62991	1.74242	4.57899	2.39453	2.2836	1.34166	5.53058					0.687697	0.46441	9.86425	0.96024	0.429012	1.38553	1.01111	0.0866144	1.90869	1.65028	3.58649	1.6877					0.8738
	9.08126	18.0748	3.86801	4.10608	1.58209	3.41929	1.18325	0.119294	4.35899	1.20246	8.11381	2.31166					0.879719	6.91075	0.41779	0.911214	1.9163	10.8009	2.4996	6.27336	4.07457	3.15878	1.45077	4.26412					0.231193	0.59388	9.73178	0.72502	0.249265	1.70222	0.647989	0.103087	1.41495	2.28297	2.84687	0.871551					1.5975
	6.70967	15.7589	3.29883	3.69163	3.78667	6.90039	0.507766	0.145884	3.56782	1.05487	7.24924	1.37066					0.920332	7.75494	2.1525	0.627624	0.827952	10.9246	2.18825	7.3784	6.24828	4.48306	6.21094	4.00563					2.19505	0.669602	7.56683	0.279104	0.205465	1.71348	0.455149	0.154188	0.892377	2.13673	1.16966	1.03942					2.02419
	8.32196	12.9927	4.79599	3.20263	3.85283	4.39296	1.87867	0.159605	3.19117	0.289851	9.07985	3.56061					1.81396	8.22535	0.654353	0.59589	0.288396	11.3426	1.62485	6.44834	4.41284	5.83352	5.1753	3.31352					0.825222	3.12389	5.61675	0.272217	0.476281	0.612704	0.766274	0.0957363	0.564513	1.94311	0.800765	1.0002					0.434221
	5.06117	13.6203	5.41445	2.28984	3.99024	4.17021	3.10879	0.184508	3.10024	1.28394	6.99195	2.90154					1.41196	7.12	2.41734	0.211082	0.340628	10.0637	1.24111	6.59683	4.64112	6.61417	6.20591	2.47985					2.54393	2.83598	5.24786	0.695059	0.798035	0.193344	1.04566	0.129365	0.264391	2.44569	0.52793	1.37224					0.70344
	4.91708	13.9727	3.35693	2.48179	4.24521	5.71601	5.27599	0.141224	3.09099	0.847078	4.9753	2.87682					1.7525	5.21018	0.583769	0.414315	0.492841	10.0917	1.06428	6.53079	4.53983	6.22551	5.41941	2.61066					1.29951	3.57555	3.76684	0.552729	0.714023	0.53029	0.54015	0.180513	0.259283	2.14079	1.69796	2.93914					0.467415
	4.60724	14.5872	3.30688	3.1591	3.99701	5.11133	3.7835	0.669505	2.27179	0.435305	4.61257	3.2638					2.25392	5.57136	1.0673	0.404604	0.467124	7.83971	0.385852	5.23672	5.27099	6.17473	5.27875	2.14548					1.21683	3.66557	2.36883	0.724475	0.590972	0.961597	0.443591	0.214714	0.304363	3.04666	1.66204	2.29234					0.632044
	5.03832	13.4601	1.73003	3.15787	3.368	5.23983	3.85475	0.803322	1.85746	0.468673	3.46511	3.51231					2.06958	5.71285	0.709682	0.262828	1.19405	7.62072	0.517545	4.31628	5.82395	5.63546	4.23005	2.02745					1.17684	3.89914	1.00217	0.840948	0.659945	1.24297	0.537742	0.0835622	0.344562	4.19505	2.21627	1.98276					1.29732
	5.70824	12.0764	1.48973	2.97468	2.82472	5.52071	3.5542	1.64238	1.17952	0.466853	2.19662	4.63053					1.95844	6.47852	0.772636	0.516967	0.872372	6.90133	0.613008	3.66109	3.21061	4.91645	3.85663	1.72352					0.669897	5.17312	0.349377	1.20136	0.47974	1.08102	1.82021	0.115347	0.260666	5.46315	0.915276	1.61333					1.74358
	3.72301	11.5603	0.576608	3.05222	1.80736	8.01063	3.42913	1.53297	0.871364	0.206198	1.22517	5.68756					2.44661	6.56437	0.490805	1.40159	0.64452	7.39506	0.484747	2.71784	2.9331	5.16827	3.49246	1.99718					0.736307	6.10535	0.497416	1.40415	0.641101	0.746427	1.52226	0.12106	1.98756	6.46574	1.74963	1.60317					2.23379
	3.99054	10.8761	1.43511	4.04011	0.719545	7.50476	2.86423	1.74151	0.873029	0.0662658	2.56852	8.08295					1.35562	9.0961	0.156018	0.439293	0.189666	6.23158	0.493362	2.08249	2.81463	5.71629	2.34637	1.30233					0.841142	5.13585	2.12034	1.56399	1.65145	0.257109	1.48895	0.142661	0.269776	5.86344	2.36535	2.0038					3.16893
	5.37098	10.6285	0.853431	5.51951	0.257458	7.98703	2.09371	3.10803	4.73417	0.225642	1.74107	11.188					0.196167	9.94484	0.204189	0.555544	0.32982	6.78565	0.23783	1.77892	2.43787	6.1753	1.93778	0.647558					0.614129	4.33065	2.11939	1.61686	1.69974	0.870486	2.59417	0.0374442	0.847775	4.69418	2.59808	4.42035					4.1747
	3.70752	10.3013	1.23009	5.50148	0.384434	7.38849	1.69249	3.07336	4.65502	0.265005	2.05243	12.5886					0.493253	10.7884	0.856968	0.407399	0.155294	6.83645	0.306664	1.55137	5.06785	5.95654	1.04961	1.0881					0.710102	3.96066	2.21927	1.08896	3.53985	0.682891	2.16063	0.0475455	1.1011	4.4321	2.51804	3.0023					4.50956
	3.39653	9.66195	1.58031	6.10248	0.541005	7.07242	1.3859	2.81593	4.06591	0.0325994	2.24039	12.3886					1.62691	10.7829	0.843553	0.378763	1.1866	9.72049	0.136601	1.54243	4.05215	6.51344	0.81639	0.859063					0.857138	3.6389	1.39454	1.079	1.62416	0.585396	1.84276	0.121252	0.890312	5.41524	2.58354	4.06001					4.33289
	2.69817	9.1214	0.673375	6.97492	0.743485	7.30553	1.23694	2.88707	3.39459	0.200459	4.53055	11.6853					0.582726	8.14876	0.449358	0.195461	0.546727	12.6086	0.205814	2.16316	2.91982	6.24479	1.06114	0.58033					0.281228	3.13333	1.21467	1.23415	1.69114	0.70181	1.76438	0.0224028	0.622254	4.38269	2.14041	4.47407					4.96686
	2.04397	11.2472	0.339048	7.20912	0.7966	6.25203	0.995506	2.6583	3.31378	0.586412	4.58821	8.85303					0.352828	7.28811	0.312589	0.379283	0.468393	12.4419	0.524266	1.44615	2.06855	6.69721	3.0837	0.942134					0.70124	2.98732	0.890109	1.47918	1.51375	0.486332	2.22839	0.0820047	0.493232	2.86902	1.62439	3.85559					4.0466
	2.8598	10.069	0.518481	6.19264	1.92608	5.07797	0.680977	2.01235	2.59402	0.495604	4.65673	6.25305					0.0973238	7.18931	0.243976	0.146344	1.14763	13.4454	1.006	1.21157	1.66391	4.64572	5.17015	0.774397					0.544111	2.0926	0.998968	1.46952	1.45781	0.632603	2.05231	0.107054	0.682206	1.18657	1.40369	2.82993					2.71928
	2.24525	8.05906	0.61632	7.64212	1.97788	4.23969	0.806906	1.49184	2.44589	0.599787	5.42765	3.9439					0.355509	7.18878	0.49262	0.331891	0.633968	13.7138	0.880936	1.00821	4.2972	4.76876	6.43826	0.337651					0.48713	1.22484	1.39718	1.48052	0.93777	0.411861	2.12255	0.294036	0.884802	1.07299	1.36417	2.16024					1.00097
	2.76231	6.52484	1.46836	6.9284	2.73112	4.80825	1.7218	1.31123	3.49006	0.383385	8.86462	2.50433					0.314965	7.52373	2.55208	1.74305	1.75274	13.7338	1.18128	1.43321	2.48008	2.18188	6.20777	0.26093					0.370957	0.683236	1.31499	1.76129	0.609756	0.166907	2.28272	0.713454	0.573348	2.34166	1.2806	2.16549					1.00762
	2.70141	6.22063	1.35119	5.92249	3.32216	8.1237	1.38806	1.32999	3.62867	0.340893	7.68419	1.6889					0.415923	7.10026	1.34226	0.575696	2.37527	15.0344	1.34511	2.04883	2.62935	2.08268	6.80235	0.18701					0.858103	0.781028	1.21021	2.05912	0.700681	0.23831	2.24559	0.949146	1.0105	2.17663	0.805929	1.64195					1.42968
	3.22956	4.09718	2.46407	5.46374	2.98949	4.66717	2.12277	2.37063	2.54864	1.00312	11.1724	1.57092					0.798719	7.34177	1.42615	0.621041	1.54884	13.6116	1.26548	2.72069	2.88321	1.83414	4.80348	0.123998					0.617127	1.4143	0.756054	1.49954	0.223341	0.329884	2.12737	0.90289	5.36465	2.35004	0.58948	2.21873					0.471799
	4.09832	2.48728	3.57841	6.67157	3.89574	4.47009	2.55093	4.51422	2.577	0.432162	8.62937	1.6208					0.856748	8.66035	3.11202	1.2552	1.87323	15.1673	2.23453	2.1824	2.59955	1.16375	3.58155	0.197714					0.513839	1.36297	0.84703	2.66444	0.448464	0.41319	1.20458	0.96009	0.671823	2.11057	1.27039	1.78628					0.944714
	5.26091	1.7228	8.21769	9.66453	4.82014	3.42722	3.21552	3.48082	4.61937	0.76003	9.18885	3.39968					1.00913	12.1463	1.29688	0.932566	1.89515	10.9613	2.21451	1.7592	5.8421	1.02828	3.02789	0.335671					0.546273	1.0164	0.658605	1.54286	0.0942477	0.132063	1.52326	0.990729	2.1652	2.063	0.758455	1.2996					3.14801
	7.13397	1.09479	7.09699	10.81	6.00992	4.01622	2.50504	3.22678	2.90326	1.00741	10.9683	3.23108					0.704492	10.5162	0.858065	0.577581	1.96552	14.6497	2.59318	2.3886	5.70163	1.53815	2.57389	0.273751					0.582094	0.845916	1.31353	2.88423	1.37168	0.771507	1.2346	1.22112	1.99311	2.66122	0.963891	1.66232					3.37879
	5.14472	0.644995	9.70981	12.4635	7.38299	6.69558	2.01019	3.00799	3.54341	1.02482	7.30389	2.37114					0.54777	12.2177	0.715391	0.313794	2.25964	9.6555	2.1485	3.22953	5.17679	0.741366	3.16151	0.195036					0.559527	0.420732	1.51024	0.226331	0.484918	0.811521	0.729712	1.33748	1.64568	2.10408	0.725659	1.97049					2.28911
	4.73019	1.33985	12.4172	13.8387	9.31978	6.7318	2.00545	4.02218	7.24763	1.87303	6.12292	1.82718					0.378134	10.3616	0.58662	0.480733	1.84198	8.59071	2.32447	4.80548	7.46977	1.14545	2.1785	0.153103					0.721842	0.572033	1.57611	0.989111	0.530948	0.446184	0.679734	1.47735	2.59711	1.74238	0.524819	2.5824					5.24192
	4.2721	2.01485	12.4449	12.9879	12.0253	7.91473	2.53052	4.61159	5.57736	2.06436	6.19651	1.93087					0.661547	11.3964	0.542264	0.0941562	2.23291	7.18801	2.27369	4.93284	6.37832	0.961402	1.49522	0.407402					0.893372	0.17411	1.75385	1.78954	0.352311	1.14811	0.790744	1.80417	1.01868	1.76343	0.454759	4.15833					5.10329
	3.5009	2.60508	14.0486	13.6597	14.4161	10.4334	3.03982	5.74643	4.69749	2.2829	8.41906	3.10337					0.377768	9.25992	1.52831	0.158666	2.34036	4.25824	2.30267	4.87865	9.43889	0.775222	1.37618	1.3598					0.520667	0.213987	1.92592	1.00319	0.915969	1.99181	1.91118	3.20129	1.30085	1.16589	1.36142	3.52115					6.87881
	3.26622	2.44452	14.0493	13.3124	13.074	8.77015	2.98889	7.25674	5.50715	1.91258	5.73137	1.79544					0.356362	7.88499	2.90094	0.818877	1.95104	6.44302	2.73976	5.4678	9.21925	1.85983	0.906693	0.93566					0.591686	0.568281	1.40704	1.06211	0.484379	3.00952	0.26833	4.30734	5.33884	1.06776	1.40943	1.524					4.36769
	5.34886	5.35129	15.5488	13.082	11.9971	8.22346	3.17696	9.00163	4.68952	1.65796	4.16754	2.1457					0.859941	8.31443	3.37259	0.793512	1.24848	5.41708	2.65923	6.02707	10.1595	1.9865	0.528095	1.84052					0.461692	0.788031	1.75415	1.32484	1.87784	2.98771	1.383	7.39482	2.71295	1.88517	5.26373	1.49243					7.21085
	2.31715	6.0663	13.7668	12.1081	9.8125	11.2596	3.40652	10.7998	2.9503	1.61263	3.08233	1.80306					0.582007	10.6016	3.31804	1.39933	0.699681	2.58101	3.15216	7.42917	8.85059	2.00525	0.570069	1.83126					0.797861	0.973106	1.45038	1.07516	1.3335	3.83442	0.556814	5.95835	2.00305	0.578559	6.55933	1.82552					4.10578
	1.61389	5.57099	11.7181	11.0986	8.26807	7.62182	2.83511	12.3904	2.28352	1.16671	2.4177	1.64268					0.499091	11.6434	2.93665	0.573741	1.16712	1.70357	2.03291	8.40811	7.91433	3.03416	0.353123	2.09996					0.664652	0.973676	1.06789	0.705647	1.34174	4.54164	1.11159	5.74487	1.8781	1.08625	7.59928	2.15251					3.30996
	1.17794	3.96963	10.5963	9.89339	6.57234	5.25571	2.19437	15.1069	1.26152	1.54488	2.0429	1.77447					0.24203	12.8965	2.77985	1.32156	1.27948	3.24622	3.83428	9.18054	8.41281	5.28757	0.59095	2.40869					0.63583	2.95471	0.397816	0.846825	1.63002	5.04551	1.67517	5.85969	1.94162	0.900851	9.09754	1.967					4.3865
	1.84548	2.96191	9.60811	9.49455	5.24075	4.35229	1.5991	14.1323	4.34679	1.61817	1.35237	2.38769					0.240552	13.9712	3.14104	1.97908	1.21757	4.74579	3.61666	12.5301	9.90203	5.4505	1.4527	2.20479					0.954711	3.96973	0.14446	0.425403	2.1389	5.5008	1.459	5.11405	1.09775	0.760152	10.0843	2.10823					3.10027
	1.70515	4.33188	8.28873	10.1509	4.515	5.67023	2.72413	15.494	2.11452	1.34908	0.785294	3.14937					0.586252	16.2948	2.71795	1.78521	0.88612	1.51471	2.76186	12.9984	7.15151	6.63838	1.44576	1.87626					1.22474	7.07995	0.509972	0.368932	2.13388	6.77299	1.34787	5.41982	2.62579	0.942541	11.1851	1.77681					3.06932
	1.39469	6.2031	6.63978	11.0112	3.80892	7.60945	3.23209	14.5383	5.23972	1.12646	0.158176	3.0251					1.77302	13.4184	3.04826	1.43098	1.23565	2.55648	1.61658	13.0117	5.02705	8.00699	1.3537	2.3128					1.08822	4.22108	0.37294	0.411903	1.67897	6.52564	0.89962	5.49372	1.51352	0.720646	8.79028	1.51503					3.02865
	1.63428	6.83518	2.86758	8.75769	3.05871	9.18072	4.73897	14.4189	7.33398	0.520201	0.572521	4.72537					1.45047	14.4729	2.41056	1.39613	1.98698	0.701748	0.652819	12.6398	2.70907	8.58716	1.74201	2.98487					2.07575	2.53339	0.568605	0.347753	1.11687	7.41287	1.67386	7.72709	1.08594	0.308957	7.72185	0.661321					1.06534
	1.26567	5.96088	1.74365	8.0889	2.63359	8.77935	5.13724	13.5814	7.99293	0.483205	0.906395	6.51045					0.851264	10.6905	1.76659	0.867958	1.63917	1.25305	0.647332	11.5061	2.12993	8.12639	3.96844	9.42624					2.3062	2.62418	0.204995	0.385319	0.79986	7.94708	4.51877	6.60026	0.631328	0.28759	7.25804	1.07275					2.00264
	0.75434	4.84635	1.40038	7.63267	1.91796	12.5846	6.05567	13.7777	10.6428	2.91492	1.16809	5.64517					1.00514	9.24918	1.09953	0.875072	2.03363	1.98616	0.140934	10.9085	0.964952	7.75486	2.69457	5.98145					2.80021	1.7114	0.059343	0.445059	0.508537	7.20217	2.43326	5.51225	0.615498	0.156437	6.9501	0.880418					1.67886
	0.634239	4.48267	1.40553	5.3733	1.29783	11.5531	6.1544	13.6392	9.67527	2.83588	0.989689	6.26979					0.77399	8.69552	0.632603	0.624202	3.04367	2.48954	0.159515	11.345	0.137818	7.20083	2.43764	5.11595					3.85484	1.74567	0.058858	0.365679	0.26751	7.07708	1.24609	5.37121	0.613644	0.301459	6.89393	3.96569					2.80153
	0.688174	2.54229	1.97988	3.90661	1.45377	12.3322	5.81634	12.2293	9.21368	4.52176	0.830491	5.84453					1.51945	8.19971	0.298318	0.409902	1.6349	3.83434	2.14274	11.6712	0.45792	6.81621	2.12995	4.64728					5.45958	0.701894	0.0903322	0.689649	0.2426	6.31131	1.82079	4.23485	0.519655	0.507893	6.24246	1.44634					3.43561
	0.548744	1.53722	2.43315	4.37098	0.81982	9.14285	5.15339	14.0215	9.28915	3.39356	0.976699	6.67753					0.360593	7.42829	0.531117	0.289911	0.965239	3.2207	0.663468	12.3132	1.77188	6.12814	2.23132	3.90046					4.01308	2.17939	0.252911	0.557192	0.381841	4.71265	0.941827	3.4583	0.804651	0.435005	6.83961	1.34073					1.64063
	0.286758	2.76789	3.82678	5.14545	0.551584	8.26255	7.52574	11.762	10.1979	7.29066	0.624313	7.07013					1.9295	8.84433	0.330692	0.0457831	0.648717	2.38975	1.65628	14.3053	6.77047	5.99159	1.3655	3.71551					3.7488	2.22408	0.0820252	0.530617	0.181409	2.49266	1.31531	2.628	1.28059	0.167602	9.69238	1.05964					2.40624
	0.236463	1.81432	3.34673	5.59528	0.745759	7.73227	6.93262	10.5372	8.81118	4.53674	1.31074	7.05023					0.920886	10.5834	0.53797	0.458492	0.703374	1.77307	1.32211	13.4446	8.23534	4.74227	1.07296	3.27572					3.99609	2.01835	0.147395	0.289249	0.181453	1.77766	0.856218	1.66295	1.42342	0.307732	8.43946	0.81994					1.11582
	0.244669	1.9335	3.90396	7.34891	0.736488	6.54112	7.83816	9.60136	10.9445	3.79053	1.47414	7.44228					0.511954	12.6874	0.717107	1.00034	0.889322	0.613072	1.07421	13.5465	8.99347	6.71864	1.38522	5.60438					3.29815	2.16353	0.116612	0.445419	0.0601287	1.50302	1.16182	1.33817	1.68963	0.294772	15.5547	0.694185					0.59011
	0.618533	1.98893	5.24444	8.26011	0.953222	6.49463	7.87667	10.6029	14.2516	3.94063	0.972017	5.40517					0.967783	11.5351	1.57615	0.954481	1.23958	1.89333	1.20936	13.8018	9.35658	5.40099	1.78451	5.51035					1.80692	1.9966	0.359412	0.357212	0.247748	0.720219	3.10903	1.02834	1.16467	0.366877	11.0422	0.506406					0.506024
	0.275351	0.94077	5.73039	8.92227	0.515182	4.68503	6.45912	10.0723	11.4217	3.05298	0.675241	4.23611					1.97552	13.4254	1.08777	1.6637	0.8011	4.04334	0.614561	13.1312	10.7367	4.28199	1.95338	7.6701					1.38131	2.11646	0.168568	0.855044	0.432764	0.643707	1.66618	3.71954	4.0395	0.106405	17.2174	0.226815					0.299221
	0.559715	0.601785	9.04937	8.97951	1.02217	3.89107	7.10941	8.09959	9.29244	3.32519	0.993888	3.8871					0.544023	13.5395	1.392	1.85488	0.886233	2.7959	1.08704	11.6693	7.38252	5.23838	1.73678	9.17518					0.942976	2.26807	0.171297	0.242172	0.194155	1.20805	1.52886	2.60559	2.12231	0.199925	11.7056	0.213909					0.23688
	0.531871	1.09659	8.42556	8.26317	0.776366	2.96144	9.94316	5.97414	9.40265	6.16177	0.648489	3.05659					0.950048	11.6196	1.72834	2.28635	1.4387	1.97258	0.58282	10.4132	6.74232	4.63374	1.66748	7.22464					0.749464	2.66447	0.117134	0.390286	0.134222	1.15943	1.58952	6.54913	3.13973	0.0994536	11.9732	0.0838981					0.281643
	0.424384	0.769689	8.69504	7.60376	0.742128	2.79744	10.5304	3.52926	7.32376	4.2078	3.94741	3.77954					1.54271	11.0634	2.10931	2.25629	0.770439	1.73869	0.147756	10.7115	6.40534	5.79887	3.71257	5.41412					0.997973	1.75854	0.22622	0.544969	0.61984	2.69137	1.07325	6.92831	3.48449	0.0960954	7.62248	0.156967					1.38341
	1.28953	1.10885	8.97259	7.00846	3.18345	2.14386	8.68165	1.34171	6.55254	3.57545	2.24424	4.49787					1.43882	8.49794	2.28045	1.47079	1.45878	1.38208	0.367384	10.4443	5.96282	5.56363	0.900563	3.83951					0.791251	1.60751	0.228604	1.01439	1.75011	2.03248	0.740631	7.52054	2.24327	0.217692	6.58272	0.206634					0.697205
	1.32367	2.5947	7.59645	7.72378	0.522652	1.60762	7.64229	1.05813	3.50236	3.83443	1.80875	7.0516					0.935645	10.0816	1.51782	0.662832	0.943455	2.23762	0.376771	10.6891	5.5113	6.02873	1.43947	4.15682					0.997263	1.22953	0.180299	1.21777	2.62369	2.03917	0.406369	9.06358	1.9512	0.0648069	4.19176	0.0761569					1.09266
	1.84993	2.27549	8.09461	8.04239	0.427581	1.46919	6.66785	1.38598	2.72651	4.51261	2.45716	5.98109					1.23932	9.17925	0.46365	0.428141	0.559117	3.89388	0.384018	11.3924	6.09859	5.73633	1.60496	2.97844					0.521809	1.47263	0.0589537	1.23562	1.91166	1.70155	0.256018	7.30055	1.69144	0.14633	2.90089	0.293734					1.42262
	1.58558	2.5626	6.80161	7.8636	0.604918	3.00244	5.24347	1.52372	0.751463	5.05998	3.71752	6.4386					1.22409	8.72525	0.135551	0.898753	0.60778	3.01471	0.483396	11.5125	6.08792	7.23437	1.28596	2.11445					1.86676	1.9382	0.169369	1.30647	3.86228	2.32595	0.180758	7.30645	1.0285	0.156859	1.73499	0.222907					0.999734
	0.369431	2.12815	6.28308	10.5	1.72927	3.56953	5.14136	1.18634	2.40329	3.81075	6.23563	5.69201					0.897322	8.73151	0.797075	0.70303	2.20099	7.74714	0.157354	12.8278	4.78122	7.04426	0.744062	1.32745					0.670135	2.17686	0.0656286	1.0744	2.49048	2.40015	0.190662	5.65226	1.35026	0.183264	0.807939	0.116485					1.23589
	0.589505	3.58436	3.46089	10.2975	1.46541	2.82784	5.54313	1.70311	2.96989	4.05749	10.5241	5.61491					0.684111	6.95837	1.39955	0.834224	2.07704	5.14544	0.244932	14.0211	4.76078	6.58342	0.58799	1.8655					0.386653	2.03562	0.0928985	1.38279	2.14945	3.32308	0.426361	4.51147	1.031	0.18251	1.23656	0.214677					1.37035
	0.338599	1.74452	2.25971	10.9062	1.9492	4.30709	7.93333	2.7555	2.86747	3.65407	8.39098	6.5059					0.580044	10.0691	1.22135	0.682501	2.97879	6.9506	0.447673	12.4404	4.81128	6.44281	0.800722	1.7929					0.713711	1.93073	0.1435	2.32965	1.63098	2.36154	0.315638	4.19123	0.573483	0.16852	1.263	0.300397					1.12016
	1.1089	1.9554	2.94141	8.01812	1.65827	2.85596	6.18614	2.91051	3.00659	3.28967	9.06959	5.52605					0.553051	7.72009	2.17951	0.488794	2.03551	7.4992	0.124707	11.9964	4.63861	6.51538	0.725805	1.66684					0.111959	2.50102	0.117332	3.58961	1.32422	2.01307	0.987741	3.93235	0.796105	0.0612344	1.01851	0.450826					1.28906
	2.92002	1.66247	1.83841	7.76711	1.47951	3.30724	8.01198	3.73508	2.69506	2.95242	9.7098	5.23458					0.644003	9.24416	1.67344	0.360281	1.81393	11.5726	0.3179	11.1648	4.82269	6.11899	0.776375	1.89128					0.269816	2.57136	0.0453632	3.07749	0.599933	1.69871	0.652521	3.57775	0.816532	0.0298558	0.454675	0.221179					0.951941
	4.95935	1.45892	1.35223	7.11057	0.938909	4.02858	6.02249	4.41967	3.59892	5.63377	7.16014	5.5127					0.643166	7.57334	3.36176	0.375017	2.25863	9.19571	0.355427	10.8988	5.65286	7.48185	1.72716	1.88366					0.497807	2.59692	0.0608679	3.28826	0.283826	0.647206	0.326518	3.62747	1.23765	0.201374	0.962468	0.202038					0.756698
	4.7985	1.6803	2.42782	5.16758	0.937445	2.79388	7.16605	5.5084	4.05105	4.47791	7.33935	4.02831					0.45955	8.56265	3.80967	0.348428	3.91293	11.1588	0.0627939	11.0238	5.57396	5.6697	4.10267	1.66948					1.05379	3.12711	0.0613153	2.53049	0.367448	0.83449	0.446321	4.07935	1.28103	1.36794	2.27903	0.163916					0.748125
	3.51587	0.441739	1.43258	5.52668	1.31963	2.14572	6.78986	5.87035	6.24147	6.38661	6.65154	4.52774					0.394917	5.24476	2.47727	0.243343	2.65652	10.0442	0.616219	10.5205	4.92446	3.65286	2.29862	1.87904					1.34782	4.35138	0.064012	2.40018	0.670803	0.361495	0.492153	3.57157	1.51741	2.96164	1.94364	0.924433					0.862124
	3.35311	0.58248	0.930828	6.67006	1.41382	4.00134	10.8717	7.96923	8.87004	7.74599	5.77105	3.74242					0.190417	4.33165	2.24789	0.373951	2.98915	10.7013	0.860995	10.9957	3.81796	4.0633	1.8393	2.03961					0.619291	4.39571	0.106533	2.32017	0.557996	0.626107	0.530291	3.56695	1.48634	2.97746	1.05462	4.33006					0.387892
	3.09623	0.508827	0.318617	5.85763	1.31539	4.16238	11.3582	8.29601	8.96128	6.32096	5.52931	1.67678					0.21766	4.18208	2.08688	0.170606	2.36181	9.12118	0.0978216	9.59763	4.37377	5.27116	0.9768	2.22392					1.12477	4.8327	0.0850553	1.74224	0.426353	0.311722	0.734884	3.3451	1.10906	3.1955	1.48099	6.58954					0.445498
	3.14762	0.0674662	0.56454	8.38299	0.963448	5.55985	11.311	6.13883	10.9655	5.20465	4.27375	0.92855					0.581547	3.4839	12.3833	0.130458	3.11752	7.98361	0.312836	9.68991	5.57242	4.2387	3.38368	1.84011					1.59741	4.44265	0.0202277	1.40526	0.104175	0.0874356	1.51281	3.31539	2.28134	2.15871	1.28529	6.43439					2.42111
	4.09035	2.26749	0.94965	8.32203	1.08279	6.19457	11.1334	7.50548	11.3128	8.06274	4.13717	1.39679					0.237776	4.87182	4.85124	0.155447	5.86905	9.73734	0.132741	10.1877	5.19292	3.66301	2.93411	2.34794					1.38932	5.14624	0.0915883	1.31603	0.191551	0.267114	1.33796	3.66124	2.77069	2.05483	2.10263	7.14856					1.43888
	4.58474	2.97592	1.32977	7.99007	0.727125	8.0848	9.76385	5.10211	14.6411	7.07454	3.58964	0.318526					0.702355	2.5202	4.54907	0.109716	4.52763	7.99325	0.305766	8.68889	6.48884	3.15997	3.1748	1.23125					1.43535	5.50811	0.181674	1.67175	0.164423	0.429212	2.26458	4.30717	3.43274	3.43521	1.26409	6.29127					1.9695
	5.28248	1.70073	1.33777	7.27423	0.699996	9.29578	9.11323	4.04183	18.2888	6.55222	2.78025	0.928802					0.885592	1.65196	4.00504	0.305784	2.8475	7.56467	0.4024	6.92927	10.012	2.28669	3.08589	0.823586					2.14174	5.33517	0.113417	1.41914	0.440862	0.505031	5.95287	5.47169	3.72877	4.12785	0.266097	5.77026					3.2346
	7.21492	1.14547	0.764074	6.1818	0.518182	9.52891	7.6777	3.61075	19.1968	4.43582	3.89209	0.253204					0.683939	2.00152	3.60382	0.55877	1.18029	6.70844	0.673769	3.90419	9.7731	2.50709	2.99984	0.499702					3.11606	5.30359	0.117747	1.32532	0.389773	1.09247	3.70044	5.37538	3.75782	5.6354	0.0582694	5.89547					4.26654
	8.47054	0.885858	1.77325	5.85384	0.418609	8.89423	6.04067	2.63393	13.19	3.59082	4.69142	0.626332					1.35482	2.38535	3.72731	0.543756	0.424348	7.26283	1.09082	1.71772	9.26482	4.47405	3.40647	0.613869					1.32506	4.36832	0.045836	1.89285	1.54006	1.2748	4.49866	5.52643	4.04544	5.96859	0.932644	5.77812					5.09371
	8.18414	0.403064	0.731029	4.42628	0.186867	9.76124	4.41449	2.41265	13.6028	3.24662	5.34776	1.37654					0.547758	2.08155	2.69836	0.665906	0.15496	6.70547	1.32815	2.00701	9.00741	3.18701	3.45061	0.325758					0.936556	3.1524	0.098605	1.29029	1.36569	1.40986	4.48602	5.38176	4.39717	6.26314	1.83393	4.32826					5.96336
	8.66263	0.488804	1.2688	4.61858	0.839586	9.72475	4.83092	2.00552	9.17403	2.15383	6.51274	1.3618					0.414469	2.34842	2.37555	0.832648	0.446335	6.04878	0.901021	4.50274	9.8599	3.44869	3.29644	0.44467					0.882133	2.43292	0.114314	1.1845	1.41795	1.59009	4.70794	6.29459	3.92781	5.81876	1.61275	3.34666					5.751
	9.31211	1.03527	1.06435	4.26942	0.858055	6.85372	4.67404	2.22691	4.91857	1.1819	9.53368	1.78647					0.443451	3.00685	1.85233	0.592471	0.416157	5.27963	1.15142	2.52156	10.9308	3.399	3.00881	0.550732					0.812262	1.5539	0.12189	1.05568	1.22272	2.52614	4.67524	4.84047	5.50528	5.20361	2.09732	2.49593					6.65372
	8.30849	1.31561	1.87454	7.06039	0.619118	6.85383	4.06184	2.34839	4.5255	3.39305	13.3147	1.17646					0.503799	2.27169	0.74359	0.699058	0.541901	5.27567	1.32641	3.07791	13.197	2.57338	3.04185	0.304355					0.597934	0.999641	0.0708185	1.15822	1.23047	1.72274	4.21317	4.41483	4.80597	6.12012	1.92306	1.7052					7.51128
	7.51377	3.55875	3.6064	4.94941	1.14156	8.07804	4.08349	1.40689	4.6285	3.43929	14.4168	0.744054					0.390844	1.52704	0.768261	0.755789	1.18085	6.80332	1.59505	3.5513	13.8355	1.88722	2.97467	0.712856					0.697756	0.529753	0.112717	1.80889	1.14516	1.39761	3.43121	4.61781	7.83297	6.38433	1.87295	1.54613					7.48489
	5.86947	3.3321	3.62149	3.59123	0.656031	6.56767	1.66176	2.03348	9.75139	5.93913	15.4276	1.83731					0.697958	0.771122	0.385734	0.511672	1.98378	8.15756	1.1868	4.36725	12.4129	3.09741	1.8601	0.694313					1.45603	0.191273	0.0317785	2.13639	1.3002	1.69624	2.5956	4.87566	5.90019	10.2793	1.10018	1.58053					6.3288
	4.35278	2.78237	3.88205	3.31968	0.655301	6.65186	0.406196	2.22844	11.7645	4.3214	15.8304	3.244					0.367678	0.68788	0.570365	0.707211	3.22236	9.09892	1.14039	4.18646	12.9045	2.06898	1.29437	0.327225					0.587295	0.0443596	0.0972757	2.08406	1.69457	1.32138	2.20854	3.24008	4.4406	7.43747	1.2024	1.58865					3.88144
	4.48947	2.80112	7.21471	3.53704	0.875466	8.92888	1.31309	3.42676	13.3964	5.08167	16.0777	3.18364					0.342454	0.587597	1.83527	0.568965	3.38196	10.8019	1.93354	3.28639	10.0832	1.58346	1.65111	0.434447					1.03227	0.0922906	0.108144	2.60772	0.650699	0.939418	2.0972	2.77367	2.96286	6.23313	0.80191	1.07692					3.04815
	5.15392	2.72811	6.69101	3.61331	1.35726	7.88715	1.82858	3.56591	16.6158	5.71423	14.3991	2.57501					0.290115	0.504888	3.63988	0.471124	3.61251	10.5227	1.73992	2.57252	9.00033	1.37986	1.22997	0.159493					1.36162	0.0800813	0.113299	2.75284	0.589407	0.835276	1.317	1.95148	2.62846	4.33518	1.19169	0.810464					2.86764
	6.10127	2.96101	7.22654	4.43417	3.48236	9.01902	3.12863	5.97096	19.6883	4.91527	13.547	3.35646					0.36083	1.33494	2.79305	0.53696	3.32649	10.2927	1.21238	4.37042	7.937	0.711399	0.212534	0.217714					3.01799	0.263647	0.0679645	3.08566	0.184194	0.581295	0.766537	0.538569	2.43529	4.11318	1.54059	0.262965					2.67081
	6.29657	2.69556	4.30744	6.27966	3.42739	8.38494	4.28332	5.77425	20.2215	4.65338	12.5611	2.48892					0.273196	1.57821	14.0873	0.364315	3.08169	9.67305	0.546662	1.83333	5.42912	1.12087	3.02438	0.130184					2.98471	0.219698	0.0153706	2.60715	0.339889	0.733828	0.639328	0.165827	2.15141	2.86752	1.02637	0.176284					1.21873
	8.47133	2.20212	6.9584	6.51168	3.10208	10.315	3.67527	6.09818	21.8814	6.43726	13.7886	3.36735					0.137705	0.503194	6.40954	0.408858	3.1741	9.05732	0.461563	1.93451	4.84022	1.94186	1.4081	0.786722					3.54695	0.250873	0.129777	3.36504	0.428008	0.338758	0.619732	0.84936	3.03662	0.589809	0.360019	0.228068					0.288318
	7.31606	1.88025	5.81746	6.80096	3.8587	7.63724	4.7305	5.11472	20.4138	7.05593	13.5381	6.4107					0.534586	0.855927	5.82715	0.26467	3.07851	7.97929	0.235306	1.7936	3.31207	1.11629	1.08042	0.65653					3.34343	0.183651	0.138222	2.14241	0.722373	0.433768	0.621214	0.554641	1.77526	2.33825	0.41707	0.821365					0.763886
	8.49695	1.58644	5.46435	7.14349	4.43444	5.18879	4.35585	4.50011	22.2096	6.86458	12.673	7.65216					0.249894	0.332841	5.91465	0.225282	2.04908	8.8933	0.829722	2.00956	1.82856	2.58154	0.939022	0.202627					2.86126	0.233031	0.0842268	2.38267	0.866059	0.417709	0.81672	0.637988	1.89093	3.39929	1.42095	0.893776					1.22765
	8.98877	0.699561	4.02733	8.31308	3.8326	5.38673	3.56767	4.50615	23.63	8.01531	11.5847	10.2604					0.0944791	0.369877	5.80248	0.189214	2.03133	8.15385	1.26743	1.98397	3.48755	1.75188	0.637842	0.0735417					2.17838	0.0974243	0.154973	1.96706	0.59287	0.751523	0.878237	0.958017	1.05336	3.43377	0.409843	1.72728					0.908506
	10.8485	1.37763	4.69666	7.19832	3.45781	4.51444	3.90806	4.40422	19.9386	10.8479	7.70356	13.2942					0.0290985	0.369365	5.6323	0.0891686	1.9486	7.71546	1.56059	2.65079	2.41932	1.57582	0.716573	0.355974					1.9771	0.207145	0.122209	2.30091	0.994578	0.493607	1.11455	0.986697	0.559937	2.76189	0.302593	1.75292					2.65204
	11.9712	0.93192	4.70177	6.95048	4.52952	2.60668	3.0803	6.73015	18.7463	12.2775	9.48984	15.7741					0.179198	0.837383	6.277	0.033723	0.351054	6.44687	2.38388	2.45547	5.57683	1.6602	0.929024	2.40797					0.945896	0.277429	0.0629842	2.02379	0.740833	0.150584	1.52216	0.328903	0.180917	2.89732	1.14057	1.2017					0.736423
	12.1479	2.39708	4.32866	9.17376	1.45077	1.3102	2.35548	5.52118	20.6263	13.8504	5.70997	15.9087					0.0783781	1.22581	6.24218	0.0692803	2.22526	7.00731	3.02054	1.7658	5.67667	2.26668	1.72963	0.582971					1.77498	0.344438	0.0365877	1.68245	0.250519	0.363098	3.55836	0.505486	0.998615	3.16175	0.136888	0.777993					0.0961394
	11.0182	2.74387	4.4402	6.42107	1.76368	2.08495	2.70398	3.937	16.8234	17.0391	3.19399	15.2646					0.0951665	1.76469	4.75025	0.0859591	1.64095	7.09445	3.44485	1.69478	8.78782	2.75096	2.7661	0.728846					1.4423	0.129092	0.164281	1.62528	0.675276	0.765425	1.73209	0.768988	0.384892	3.09734	0.215766	1.02277					0.146287
	13.5249	6.31598	3.88172	4.77819	2.6097	1.76371	1.56203	3.92277	17.6751	16.9759	0.986174	13.6748					0.0798653	4.03092	3.93736	0.0620414	1.07875	5.48943	3.91498	2.64775	10.0911	3.59088	2.36759	0.254206					0.990549	0.21003	0.0786175	1.51306	1.09572	0.980106	1.50851	0.960868	0.783929	3.82586	0.314897	0.931359					1.34856
	9.91458	5.10749	2.13522	3.66332	3.75263	4.17674	1.07305	2.68925	18.7505	18.7055	3.11428	10.407					0.629666	6.13578	2.71796	0.0941213	1.29566	3.67613	5.37252	4.27804	13.6356	2.55489	1.90569	0.104661					1.09611	0.147997	0.105944	1.44244	0.528854	1.6075	1.35685	0.717646	0.635606	6.43824	0.618484	1.18641					1.05321
	9.50204	2.81144	1.76212	2.62151	5.85366	3.98204	0.629692	2.23216	13.7244	20.6248	4.01629	7.37797					0.44209	5.97795	1.64805	0.0718457	2.61541	3.10393	4.00455	3.89626	15.473	3.57908	1.95766	0.390795					0.707483	0.0669008	0.0926234	1.68936	0.370326	1.25393	0.965591	0.757937	0.244739	7.37438	0.294108	1.44415					0.0861038
	6.0279	2.88198	1.62623	2.66791	6.8298	1.78895	0.985127	1.59264	7.42774	20.4528	3.41279	4.92858					0.651132	6.31053	1.26034	0.147428	4.04148	3.06169	2.62776	3.2108	13.0567	3.64436	1.87494	0.0584424					0.716986	0.0437177	0.0313934	2.65846	0.30027	1.25938	1.12031	0.49734	0.223279	5.83439	0.409755	1.29314					0.0498529
	7.83588	1.80427	2.00313	2.88754	7.12953	1.82016	0.536299	1.47279	4.57245	19.9039	3.5125	3.75409					0.447929	5.32828	0.894438	0.109161	3.77084	2.14424	1.86592	3.64657	14.1488	3.31574	1.8419	0.147949					0.805194	0.0415758	0.168387	2.5149	0.28618	0.637766	1.02489	0.431547	0.276102	6.63859	0.219615	2.94334					0.875733
	3.13349	3.12161	4.07055	2.88413	7.01041	5.25112	0.612335	1.28846	3.06451	21.6777	5.18466	2.44071					1.57308	4.70635	1.82687	0.0599637	3.84582	1.61395	1.42621	5.07497	11.9813	3.35754	1.00346	0.970673					0.65594	0.144374	0.0546082	3.08161	0.136887	0.617683	0.543325	1.10362	0.22195	6.46565	0.28897	2.47616					0.525483
	5.34925	0.824551	3.88845	6.20833	7.05495	2.34006	0.869035	0.760124	1.76777	21.4043	4.96525	2.89812					1.26772	3.7712	2.52222	0.332912	4.26443	1.417	2.71779	3.82836	10.3649	4.08244	0.817738	0.211223					0.673178	0.114177	0.0587286	3.90126	0.0624812	0.593351	0.553682	1.01145	0.4432	5.31771	0.151227	2.06603					0.403865
	3.63392	3.92531	1.14467	4.52123	4.46798	4.20207	0.669875	0.148442	1.01985	20.6428	8.89469	3.4869					1.088	3.60978	2.17479	0.970383	3.26714	1.4115	2.66127	2.5313	8.73352	6.63257	0.668589	0.749503					0.786228	0.0593752	0.111802	3.85203	0.177155	0.424711	0.394757	1.80129	0.726156	5.69773	0.101446	2.57127					1.0872
	4.04675	3.2833	5.02505	5.13315	3.42789	4.52694	1.0437	0.373266	0.776884	20.2151	9.46747	5.23975					0.990003	2.59414	1.49993	1.4844	1.01297	0.90087	4.0578	2.14996	7.66985	5.61237	1.0085	0.117623					0.501996	0.105246	0.023346	3.39613	0.112744	0.168392	0.295281	2.48844	0.201296	5.681	0.105025	2.81179					1.58556
	3.62483	3.91106	1.90465	5.64272	2.61123	6.7087	2.12251	0.327287	1.72912	18.7969	8.74412	8.03675					1.15803	2.40524	1.47549	0.958514	0.514465	0.695336	5.19578	4.95787	6.68628	6.60461	0.466898	0.250981					0.564081	0.203783	0.0801939	3.89054	0.103122	0.948642	0.428315	2.40912	0.399275	7.88691	0.0675667	4.75713					1.30871
	4.56758	3.9387	4.7237	4.33042	2.67507	9.49179	0.9573	1.29847	1.61985	17.897	8.65306	9.02396					1.02419	2.1868	0.814589	0.944404	1.3482	0.630721	5.08005	5.29005	6.35863	7.46593	0.553741	0.171343					0.648756	0.102511	0.0483003	2.52095	0.12516	1.47634	0.800116	2.46122	0.525339	4.15729	0.0341877	3.80361					1.16286
	2.83134	3.12097	6.5905	5.33	4.35253	11.301	0.742694	2.31629	1.82378	16.3003	7.46176	6.25552					1.15607	3.41387	0.471541	0.672811	1.60046	0.251838	4.57891	3.92448	7.18735	7.5654	0.820208	0.295713					1.75434	0.258894	0.105084	1.4039	0.0695057	1.25961	0.690843	2.75324	0.215931	2.66374	0.162378	3.03148					0.606244
	1.3261	2.01643	3.023	3.00505	3.59826	13.7494	0.82226	3.09264	1.53213	16.8007	6.11439	11.9573					1.3718	2.62172	0.586143	0.569995	1.71183	0.333487	5.33523	4.39055	7.06425	9.10326	1.25336	1.04202					1.10557	0.0837212	0.0733977	1.79807	0.0573498	1.37022	0.377868	2.77292	0.192843	1.85316	0.102095	2.26288					0.856881
	0.964143	1.44928	2.06899	1.03668	3.95296	12.5393	0.426195	5.59996	1.35957	18.1382	4.34529	6.87821					0.969403	3.55585	1.14816	0.413	2.13691	0.550177	4.29305	4.97719	5.61212	11.2316	0.412093	3.29445					0.812059	0.0705692	0.0550561	1.90772	0.0463573	0.829714	0.469512	3.01189	0.181122	0.89068	0.105748	1.78642					0.368511
	1.35702	1.31758	1.63594	3.40931	3.76504	14.2259	0.372728	3.4993	1.11478	18.1559	3.33892	5.89848					0.616644	4.14484	0.589916	0.259076	3.53377	0.399149	6.9895	5.0797	4.53254	15.335	0.544729	6.33218					0.449853	0.990572	0.0154227	1.35016	0.166298	0.729405	0.327133	2.13944	0.960866	1.21871	0.2344	1.1686					0.0866281
	1.54738	0.946272	1.99786	3.15715	3.81087	15.2034	0.464614	2.94743	0.59548	16.0477	1.8893	8.99716					0.812752	5.2882	0.952393	0.377803	3.71397	0.555379	3.56308	4.01862	5.4038	15.3813	0.454681	8.95947					1.43311	2.43559	0.0344925	0.823872	0.0562705	0.393238	0.314528	1.54139	0.711465	3.08262	0.131896	1.98381					0.490672
	1.6794	0.759153	3.22371	2.76063	5.86137	15.3439	1.34081	2.36591	0.422021	11.3578	1.39782	6.76736					0.482257	5.74412	1.17711	0.516561	4.82209	0.416979	4.47689	3.37707	7.05966	15.981	0.268533	9.94046					1.65438	2.09039	0.0665526	0.91056	0.132854	0.422025	0.411684	2.43792	0.551548	3.20726	0.128888	2.5469					0.49739
	2.31489	0.46463	4.83207	3.14792	12.027	12.17	0.991748	1.91113	0.58146	6.84876	1.59532	7.3566					0.672502	5.57014	0.908762	0.633797	5.7037	0.376061	1.17107	3.87483	8.61241	11.597	0.311341	15.9607					1.60198	1.731	0.129225	0.529204	0.0402396	0.359793	0.270664	1.39349	0.351443	3.15003	0.520892	4.41457					0.366921
	5.02369	0.206718	7.1151	3.80262	7.81835	12.1577	1.511	2.39917	1.23006	5.06436	0.925333	7.03893					0.616927	4.73063	0.809768	1.09439	5.70391	0.345937	1.33873	4.39823	8.13018	12.7848	0.363536	9.38159					1.35937	2.34381	0.0612036	0.735637	0.073025	0.11922	0.267421	1.55748	0.551089	3.16193	1.74328	5.05074					0.549903
	5.19173	0.0795023	9.49286	2.06561	6.21913	10.1118	2.59945	1.988	2.22814	3.06535	0.60873	4.85734					0.213301	5.20664	0.496306	0.366489	6.01481	0.189842	2.02527	5.24402	3.53681	7.39731	0.332012	8.70079					1.46471	2.04317	0.0398471	0.557074	0.0109891	0.769373	0.204349	2.99218	0.595107	3.01855	1.3419	4.49154					0.337236
	4.93143	0.0227851	10.1999	1.48386	7.19605	7.93781	6.23974	1.43016	2.92622	3.07855	0.626332	3.25619					0.251546	5.13202	0.623554	0.347838	5.93577	0.4827	2.19272	5.55607	7.4868	6.16973	0.688064	6.75062					1.00739	0.82469	0.139931	0.552876	0.0394521	0.505645	0.223571	6.34735	0.571507	3.28257	0.171593	4.18195					0.827341
	5.85776	0.259363	12.5061	1.34415	6.3242	5.24501	9.33501	1.72772	2.4963	2.16996	1.97171	1.59233					0.174884	7.07694	0.286996	0.754174	4.23162	1.17935	1.4526	6.29357	6.41941	5.23071	0.288732	5.30214					0.703311	2.16265	0.0492217	0.312455	0.166357	0.426928	0.19573	4.31817	0.563501	5.84926	0.0927935	5.91752					0.884022
	7.36985	0.0265364	15.2066	0.455488	6.61188	2.93008	12.6413	1.84731	2.61589	3.14329	1.98643	1.12392					0.385002	6.78311	0.188668	1.98999	3.77379	1.08481	3.54429	6.40695	6.32515	3.70531	0.168104	9.28362					0.152365	2.76521	0.0577349	0.362226	0.107147	0.701728	0.3827	4.89655	0.263073	4.54139	0.110521	6.13115					0.828634
	5.72009	2.94406	17.2739	1.67162	7.70018	1.11494	15.6506	2.22193	3.04269	0.72606	3.08444	1.31064					0.465983	8.56322	0.0758531	2.32983	3.72175	1.63495	2.02626	5.33921	5.24898	2.81437	0.216671	9.02293					0.451831	1.82047	0.0582015	0.115563	0.11108	1.2007	0.439646	3.91663	0.272771	5.24774	1.68402	6.58765					0.955174
	6.5025	4.41398	12.7615	2.55655	9.62118	1.25118	15.8673	2.55596	1.98903	1.33752	2.37526	1.12244					0.300542	6.93539	0.0642457	1.64891	4.37742	1.93776	2.06049	5.63321	3.74825	2.7635	1.40854	15.035					1.22558	1.42355	0.111848	0.49981	0.132477	1.07618	0.250262	3.78586	0.621633	6.35898	1.10528	6.67504					0.729804
[truncated: 13 more rows]
[truncated: 83 more columns]

## Sheet: Velocity traces_G8
G8_Trial1																G8_Trial2																G8_Trial3																G8_Trial4
[truncated: 1,202 more rows]
[truncated: 83 more columns]
