# Supplementary material for: Stimulus salience determines defensive behaviors elicited by aversively conditioned serial compound auditory stimuli
Source: eLife journal article supplement (doi:10.7554/elife.53803), 2020-03-27
Supplement: supp [file elife-53803-supp-v1.zip › elife_poa_e53803_Figure_1_figure_supplement_2_source_data_2.xlsx]

## Sheet: STATISTICS
Figure 1–figure supplement 2 Source Data 2
Figure panel	Group Size	Statistical test	Comparison	Significant comparisons	P-value
1S2D	Group 7, n=12	2-Way Repeated Measures ANOVA with Trial and Stimulus as factors	Conditioning Day 1 (trials 1-5), % freezing	Main Effect of Trial (F (4, 44) = 34.71)	p<0.0001
1S2D	Group 7, n=12	2-Way Repeated Measures ANOVA with Trial and Stimulus as factors	Conditioning Day 1 (trials 1-5), % freezing	Main Effect of Stimulus (F (1, 11) = 36.06)	p<0.0001
1S2D	Group 7, n=12	2-Way Repeated Measures ANOVA with Trial and Stimulus as factors	Conditioning Day 1 (trials 1-5), % freezing	Significant Interaction (F (4, 44) = 23.71)	p<0.0001
1S2D	Group 7, n=12	2-Way Repeated Measures ANOVA with Trial and Stimulus as factors	Conditioning Day 2 (trials 6-10), % freezing	Main Effect of Trial (F (4, 44) = 4.337)	p<0.01
1S2D	Group 7, n=12	2-Way Repeated Measures ANOVA with Trial and Stimulus as factors	Conditioning Day 2 (trials 6-10), % freezing	Main Effect of Stimulus (F (1, 11) = 235.0)	p<0.0001
1S2E	Group 7, n=12	2-Way Repeated Measures ANOVA with Trial and Stimulus as factors	Conditioning Day 1 (trials 1-5), average velocity	Main Effect of Trial (F (4, 44) = 8.917)	p<0.0001
1S2E	Group 7, n=12	2-Way Repeated Measures ANOVA with Trial and Stimulus as factors	Conditioning Day 1 (trials 1-5), average velocity	Main Effect of Stimulus (F (1, 11) = 25.21)	p<0.001
1S2E	Group 7, n=12	2-Way Repeated Measures ANOVA with Trial and Stimulus as factors	Conditioning Day 1 (trials 1-5), average velocity	Significant Interaction (F (4, 44) = 7.304)	P<0.0001
1S2E	Group 7, n=12	2-Way Repeated Measures ANOVA with Trial and Stimulus as factors	Conditioning Day 2 (trials 6-10), average velocity	Main Effect of Stimulus (F (1, 11) = 47.50)	p<0.0001
1S2F	Group 7, n=12	2-Way Repeated Measures ANOVA with Trial and Stimulus as factors	Conditioning Day 1 (trials 1-5), escape score	Main Effect of Trial (F (4, 44) = 3.213)	p<0.05
1S2F	Group 7, n=12	2-Way Repeated Measures ANOVA with Trial and Stimulus as factors	Conditioning Day 1 (trials 1-5), escape score	Main Effect of Stimulus (F (1, 11) = 16.08)	p<0.01
1S2F	Group 7, n=12	2-Way Repeated Measures ANOVA with Trial and Stimulus as factors	Conditioning Day 1 (trials 1-5), escape score	Significant Interaction (F (4, 44) = 7.053)	p<0.001
1S2F	Group 7, n=12	2-Way Repeated Measures ANOVA with Trial and Stimulus as factors	Conditioning Day 2 (trials 6-10), escape score	Main Effect of Stimulus (F (1, 11) = 33.97)	p<0.001
1S2F	Group 7, n=12	2-Way Repeated Measures ANOVA with Trial and Stimulus as factors	Conditioning Day 2 (trials 6-10), escape score	Significant Interaction (F (4, 44) = 2.653)	p<0.05
1S2G	Group 7, n=12	2-Way Repeated Measures ANOVA with Trial and Stimulus as factors	Conditioning Day 1 (trials 1-5), Flight score	Main Effect of Stimulus (F (1, 11) = 5.605)	p<0.05
1S2G	Group 7, n=12	2-Way Repeated Measures ANOVA with Trial and Stimulus as factors	Conditioning Day 1 (trials 1-5), Flight score	Significant Interaction (F (4, 44) = 2.623)	p<0.05
1S2G	Group 7, n=12	2-Way Repeated Measures ANOVA with Trial and Stimulus as factors	Conditioning Day 2 (trials 6-10), Flight score	Main Effect of Stimulus (F (1, 11) = 33.46)	p<0.0001
1S2I	Group 8, n=12	2-Way Repeated Measures ANOVA with Trial and Stimulus as factors	Conditioning Day 1 (trials 1-5), % freezing	Main Effect of Trial (F (4, 44) = 41.02)	p<0.0001
1S2I	Group 8, n=12	2-Way Repeated Measures ANOVA with Trial and Stimulus as factors	Conditioning Day 1 (trials 1-5), % freezing	Main Effect of Stimulus (F (1, 11) = 123.0)	p<0.0001
1S2I	Group 8, n=12	2-Way Repeated Measures ANOVA with Trial and Stimulus as factors	Conditioning Day 1 (trials 1-5), % freezing	Significant Interaction (F (4, 44) = 19.41)	p<0.0001
1S2I	Group 8, n=12	2-Way Repeated Measures ANOVA with Trial and Stimulus as factors	Conditioning Day 2 (trials 6-10), % freezing	Main Effect of Trial (F (4, 44) = 8.748)	p<0.0001
1S2I	Group 8, n=12	2-Way Repeated Measures ANOVA with Trial and Stimulus as factors	Conditioning Day 2 (trials 6-10), % freezing	Main Effect of Stimulus (F (1, 11) = 25.03)	p<0.001
1S2J	Group 8, n=12	2-Way Repeated Measures ANOVA with Trial and Stimulus as factors	Conditioning Day 1 (trials 1-5), average velocity	Main Effect of Trial (F (4, 44) = 22.63)	p<0.0001
1S2J	Group 8, n=12	2-Way Repeated Measures ANOVA with Trial and Stimulus as factors	Conditioning Day 1 (trials 1-5), average velocity	Main Effect of Stimulus (F (1, 11) = 55.47)	p<0.0001
1S2J	Group 8, n=12	2-Way Repeated Measures ANOVA with Trial and Stimulus as factors	Conditioning Day 2 (trials 6-10), average velocity	Main Effect of Stimulus (F (1, 11) = 7.193)	p<0.05
1S2K	Group 8, n=12	2-Way Repeated Measures ANOVA with Trial and Stimulus as factors	Conditioning Day 1 (trials 1-5), escape score	Main Effect of Stimulus (F (1, 11) = 26.59	p<0.001
1S2K	Group 8, n=12	2-Way Repeated Measures ANOVA with Trial and Stimulus as factors	Conditioning Day 2 (trials 6-10), escape score	Main Effect of Stimulus (F (1, 11) = 5.777)	p<0.05
1S2L	Group 8, n=12	2-Way Repeated Measures ANOVA with Trial and Stimulus as factors	Conditioning Day 1 (trials 1-5), Flight score	Main Effect of Stimulus (F (1, 11) = 23.26)	p<0.001
1S2L	Group 8, n=12	2-Way Repeated Measures ANOVA with Trial and Stimulus as factors	Conditioning Day 1 (trials 1-5), Flight score	Significant Interaction (F (4, 44) = 3.254)	p<0.05
1S2L	Group 8, n=12	2-Way Repeated Measures ANOVA with Trial and Stimulus as factors	Conditioning Day 2 (trials 6-10), Flight score	Main Effect of Trial (F (4, 44) = 3.762)	p<0.05
