# Supplementary material for: Stimulus salience determines defensive behaviors elicited by aversively conditioned serial compound auditory stimuli
Source: eLife journal article supplement (doi:10.7554/elife.53803), 2020-03-27
Supplement: supp [file elife-53803-supp-v1.zip › elife_poa_e53803_Figure_1_figure_supplemnt_1_source_data_2.xlsx]

## Sheet: Statistics
Figure 1–figure supplement 1 Source Data 2
Figure panel	Group Size	Statistical test	Comparison	Significant comparisons	P-value
1S1E	Paired Group, n=8; Gap Group, n=7	2-Way Repeated Measures ANOVA with Group and Stimulus as factors	BL to Tone % freezing in a novel context	Main Effect of Stimulus (F(1,13) = 19.98)	p<0.001
1S1E	Paired Group, n=8; Gap Group, n=7	2-Way Repeated Measures ANOVA with Group and Stimulus as factors	BL to Tone % freezing in a novel context	Stimulus X Group Interaction (F(1,13) = 5.492)	p<0.05
1S1E	Paired Group, n=8; Gap Group, n=7	2-Way Repeated Measures ANOVA with Group and Stimulus as factors	BL to Tone % freezing, Gap	Sidak's test, Gap	p>0.05
1S1E	Paired Group, n=8; Gap Group, n=7	2-Way Repeated Measures ANOVA with Group and Stimulus as factors	BL to Tone % freezing, Paired	Sidak's test, Paired	p<0.001
