# Supplementary material for: Stimulus salience determines defensive behaviors elicited by aversively conditioned serial compound auditory stimuli
Source: eLife journal article supplement (doi:10.7554/elife.53803), 2020-03-27
Supplement: supp [file elife-53803-supp-v1.zip › elife_poa_e53803_Figure_1_source_data_1.xlsx]

## Sheet: Measurements for plots
Figure 1 – Source Data 1
Mouse #	1	2	3	4	5	6	7	8	9	10	11	12	13	14	15
Group1_Freezing
BL1	1.96296	2.2037	5.37037	3.64815	2.48148	15.6111	0.666667	1.18519	0	0.277778	0	1.22222	0.62963	0	0.685185
BL2	2.68519	75.4444	81.4444	72.3519	66.4259	20.3889	88.6852	23.3704	62.6296	85.7407	82.7407	69.5	7.94444	33.5556	66.2778
Group1_Freezing_CS1
Trial 1	0	0	0	0	0	7.66667	28.3333	0	27.3333	0	0	7.33333	0	0	14
Trial 2	13	22.3333	29	31.6667	0	34.3333	75.3333	20	95	11.3333	45.6667	65.6667	0	6.66667	41
Trial 3	96.3333	20	48.6667	55	0	54.6667	91.6667	28	90.6667	52	75.6667	81.6667	0	0	36
Trial 4	95.6667	56.3333	84.6667	99.3333	14.3333	84.6667	96	71	86.3333	100	82	94	73.6667	5	90.3333
Trial 5	52	100	90.3333	91	59.6667	59	93.3333	71	100	97.3333	99.6667	91.3333	87.3333	72.3333	100
Trial 6	0	90.6667	100	98.6667	84	29.3333	0	89.6667	28.3333	99.3333	90.3333	63	40.3333	54	60
Trial 7	100	21	100	99	86	58.6667	100	63.3333	87.3333	90.3333	62.3333	78.3333	100	74.6667	88
Trial 8	50.3333	59	97	99.3333	100	58.6667	86.3333	97.3333	93	100	99.3333	86.3333	100	100	100
Trial 9	94	100	100	99	65.3333	67.6667	71	91	100	100	100	88.3333	99.6667	93.6667	76.3333
Trial 10	86.3333	97	100	83.3333	82.6667	96.3333	100	94	33	100	99.3333	71	96	75.3333	99.3333
Group1_Freezing_CS2
Trial 1	6.66667	0	0	0	0	16.3333	5.33333	0	6.33333	0	0	16	0	0	0
Trial 2	9	17	0	14.3333	19.3333	44	1.33333	5	16.3333	17.3333	52	30.6667	6	17.6667	32.6667
Trial 3	12.6667	17.6667	87	6.33333	40.3333	51.3333	49.3333	12.6667	21.3333	5.66667	37.3333	34.6667	0	0	15.6667
Trial 4	5	14.6667	7.66667	12	0	86.3333	71.3333	34.6667	23	7	64	62	18	0	28.6667
Trial 5	33.6667	47.3333	39.6667	1.33333	1.66667	34.3333	26	16.3333	34.3333	5	30.6667	16	5	7	71.3333
Trial 6	3.66667	13.3333	1.66667	1.66667	9.66667	46.6667	0	15.3333	21	49.3333	61.3333	19.3333	0	1.33333	19.3333
Trial 7	1.66667	26	45	7	7.66667	19	6.66667	1.66667	8.33333	34.3333	30.6667	20.6667	1.66667	0	37.3333
Trial 8	0	32	23	29.3333	1.66667	17.3333	57.6667	16.3333	21	29	12	45	1.33333	1.33333	46
Trial 9	7	12.6667	12	46.3333	19.3333	1.66667	1.66667	6.66667	20	12.6667	52.6667	15.3333	7	1.33333	0.666667
Trial 10	1.66667	32	17	2.66667	19	6.33333	11.6667	6.66667	0	6	60.6667	46.6667	13.3333	9.66667	31.3333
Group2_Freezing
BL1	0	0.351852	0	7.05556	0.37037	2.12963	0.388889	0.796296	0.314815	1.35185
BL2	55.9815	57.4815	68.1852	54	76.4259	76.6111	50.9259	83.7037	0.685185	85.8519
Group2_Freezing_CS2
Trial 1	0	0	0	0	0	0	12	5	0	0
Trial 2	17.6667	58.6667	70.3333	29.6667	52.6667	0	52.3333	71	11.3333	66.6667
Trial 3	0	85	78.6667	68.6667	92.6667	80.3333	0	93.6667	0	97.6667
Trial 4	99.6667	77.3333	100	87.6667	100	97.3333	85.3333	100	6	94.6667
Trial 5	99.6667	98.6667	100	100	100	94.3333	100	100	64.6667	100
Trial 6	83.6667	92.3333	100	100	100	100	100	96.3333	36.6667	69
Trial 7	46	100	46.3333	98.3333	97.6667	100	80.3333	92	12.3333	21
Trial 8	0	95.3333	61.6667	100	53.3333	100	100	93.3333	100	98.3333
Trial 9	67.6667	60.6667	91.3333	100	100	100	99	100	86.6667	29.3333
Trial 10	100	53.3333	100	86.6667	100	74	12	89.6667	5	55.6667
Group2_Freezing_CS1
Trial 1	5	0	0	0	0	0	1.33333	0	0	0
Trial 2	13.3333	12.3333	30	21	38.6667	0	19	41.6667	5	23
Trial 3	0	12	0	35.3333	54.6667	5.66667	15.6667	60	0	27
Trial 4	17	24	62.3333	0	12.6667	43	9.66667	25.6667	26.6667	31.6667
Trial 5	41.6667	28.3333	40.6667	18	20	39.3333	36	19.3333	16.3333	9
Trial 6	3.33333	16.6667	54.3333	33	56.3333	25	17.3333	37.6667	1.66667	1.66667
Trial 7	1.66667	39.3333	0	62.3333	52.6667	76.6667	32.3333	53.3333	0	59.6667
Trial 8	12.6667	51	1.66667	63.6667	22	12.6667	21.3333	35	23.6667	45.6667
Trial 9	6.66667	7	59	77.6667	21.6667	63	13.6667	16.6667	11.3333	23.3333
Trial 10	42.6667	23	56	60.6667	18.6667	48	14	30.6667	7	22.3333
Group3_Freezing
BL1	0	2.05556	1.14815	0.592593	0.666667	0	0.388889	2.59259	0.925926	0
BL2	89.3148	84.7593	80.2963	9.77778	4.38889	75.5	6.75926	73.9815	39.5	72.0556
Group3_Freezing_CS1
Trial 1	18.3333	5	0	0	0	0	0	0	0	0
Trial 2	78.6667	30.3333	22.6667	0	0	78.3333	6	12	12.6667	0
Trial 3	72	79.6667	89	23.6667	21.6667	78.6667	5.66667	23	65	0
Trial 4	46.6667	93.3333	75	16.6667	0	6	5	64.6667	71	11
Trial 5	97.6667	19.3333	98.6667	53.6667	0	86.6667	0	71	100	35
Trial 6	92	92	76.3333	0	23.3333	96	5.66667	72.3333	60.3333	44
Trial 7	100	63.6667	91.3333	23	0	36.3333	56	100	49	63.6667
Trial 8	100	83	39.3333	53	86.6667	50.6667	69	100	77	87.3333
Trial 9	99.6667	53.6667	90.6667	11.3333	78.6667	61.6667	72.3333	95.3333	2.66667	88.3333
Trial 10	100	24.3333	85.3333	74.6667	19.6667	92	89	99.6667	66.6667	61.3333
Group3_Freezing_CS2
Trial 1	6.33333	0	0	0	0	5	0	5.66667	0	0
Trial 2	22	18.3333	5.33333	27.3333	0	24	7	0	3.66667	31.3333
Trial 3	16	50.3333	1.33333	27.3333	5	18	23.6667	14	4.33333	20
Trial 4	1.66667	3.66667	20.3333	10.6667	0	12	0	2	9	35
Trial 5	40.3333	11.6667	23.6667	0	0	1.66667	40.3333	11	7	5.33333
Trial 6	61.6667	1.66667	30.3333	0	0	1.66667	7.66667	12.3333	12	39.3333
Trial 7	72.6667	10	10	0	0	22.6667	49.3333	55	0	22.6667
Trial 8	33.3333	7	43	7	1.66667	28.6667	20	77	26	48.6667
Trial 9	76	34.3333	14.6667	11.3333	2.33333	30.6667	28	72.3333	11.3333	20
Trial 10	49.6667	13.3333	59	30	5	5.33333	49	80	4.66667	53.3333
Group1_Activity
BL1	466.319	250.335	340.174	237.381	396.921	83.6772	272.487	240.246	416.16	305.564	399.409	280.809	425.626	317.651	413.338
BL2	73.2107	10.4646	4.80481	13.1013	20.3928	87.4106	3.45704	58.6231	13.0559	4.21741	6.2987	16.1409	30.1811	43.3265	14.2956
Group1_Activity_CS1
Trial 1	442.56	359.15	509.957	172.323	234.83	121.68	74.9733	281.493	134.75	260.537	480.43	179.863	438.34	223.347	300.653
Trial 2	85.4967	122.273	46.58	84.7467	102.033	33.2833	12.2033	137.003	9.50667	99.68	119.943	30.32	274.95	193.807	73.5533
Trial 3	1.95667	111.627	39.3767	38.38	237.973	20.8067	2.13333	81.6	12.35	11.72	17.9267	3.01	352.163	45.31	94.46
Trial 4	3.94333	38.27	3.77333	0.483333	71.1667	3.81333	1.04	7.18333	4.00333	0.03	8.50333	4.34333	21.26	130.717	6.13667
Trial 5	33.9867	0.013333	3.98667	2.98333	26.9	40.26	3.26333	15.3533	0.17	0.573333	0.61	2.79	8.16	10.62	0.08
Trial 6	115.06	2.01667	0.01	0.783333	10.77	136.087	231.937	3.9	155.673	0.39	0.893333	19.4167	154.477	36.4	57.6667
Trial 7	0.226667	124.873	0.033333	1.72667	6.93333	16.2433	0.066667	30.1033	7.71667	3.3	30.9633	7.69	0.23	9.97333	2.92667
Trial 8	30.3067	23.89	3.85	0.336667	0.026667	81.13	5.27667	0.733333	3.97	0.036667	0.33	8.62	0.063333	0.31	0.006667
Trial 9	1.16333	0.02	0	1.54	30.93	47.7967	102.863	1.91333	0	0.026667	0.086667	4.65333	0.14	1.23667	15.3833
Trial 10	7.09667	1.66	0.07	48.6833	19.4833	1.84667	0.013333	1.29	66.12	0.02	0.55	20.0033	2.12667	6.10667	0.493333
Group1_Activity_CS2
Trial 1	256.637	237.39	349.957	183.453	421.433	84.2767	231.32	144.91	187.527	342.77	242.693	122.397	483.13	379.847	301.797
Trial 2	109.877	92.6667	182.013	73.37	132.107	29.7633	225.15	232.343	80.7233	123.3	36.7367	38.3267	55.7867	129.01	85.2967
Trial 3	75.1733	137.857	4.46	138.873	58.7267	22.91	19.2867	91.5333	297.19	136.843	75.9167	26.83	202.47	247.487	182.867
Trial 4	309.937	193.593	188.56	134.193	290.893	5.99	12.0033	79.91	284.24	456.703	15.93	43.23	401.413	468.393	63.6133
Trial 5	73.1667	25.6367	28.4167	261.01	227.62	43.3867	42.0267	132.12	230.027	174.5	35.22	226.66	190.473	373.13	16.9233
Trial 6	347.933	107.867	196.773	263.863	646.593	39.0233	466.9	176.603	325.953	14.27	25.1967	246.46	374.84	491.903	193.193
Trial 7	602.457	191.757	114.043	490.763	455.49	117.66	248.873	313.907	387.683	119.243	121.217	281.753	428.363	225.913	67.83
Trial 8	613.25	259.03	176.787	616.71	579.047	195.427	25.59	278.76	148.45	149.397	161.317	165.85	437.417	392.627	88.3533
Trial 9	277.153	216.813	186.89	324.257	254.693	307.813	576.727	192.597	290.397	181.273	22.3133	243.213	370.793	516.367	398.957
Trial 10	522.887	181.053	180.187	393.71	323.553	264.283	348.827	174.77	499.643	681.983	112.09	66.87	399.227	311.8	236.55
Group2_Activity
BL1	422.21	235.504	370.868	247.899	431.244	283.113	331.334	230.384	450.942	244.677
BL2	30.1281	24.5843	11.9422	15.0524	9.44926	7.39352	31.052	5.53537	223.229	10.2389
Group2_Activity_CS2
Trial 1	376.673	307.417	257.7	177.48	190.277	285.827	121.073	70.1067	305.12	357.66
Trial 2	153.117	17.6533	21.8	87.6867	32.28	55.6367	27.33	13.1267	71.18	9.41333
Trial 3	12.7267	6.04667	23.3367	15.6133	2.2	6.57667	137.66	2.04	159.987	0.996667
Trial 4	0.666667	4.67	0	3.33667	0.05	0.733333	2.69	0	140.803	2.44333
Trial 5	0.1	0.883333	0	0.013333	0.01	1.44	0.033333	0.026667	23.41	0.023333
Trial 6	14.6133	5.61	0	0.01	0.016667	0.046667	0.046667	1.77	125.78	10.5233
Trial 7	11.79	0.06	160.453	1.16	0.24	0.023333	11.8767	0.583333	162.863	235.32
Trial 8	318.597	3.46333	112.3	0.086667	254.13	0.283333	0.186667	2.00333	0.023333	0.67
Trial 9	16.0967	15.35	8.62	0.026667	0.033333	0	0.46	0.083333	8.34667	194.67
Trial 10	0.366667	36.7133	0.056667	2.65667	0.006667	7.4	219.863	5.01333	241.26	83.56
Group2_Activity_CS1
Trial 1	315.777	144.623	295.363	182.117	299.7	199.76	310.023	137.15	679	260.597
Trial 2	491.933	82.3033	90.64	89.1133	140.103	152.313	181.847	75.5733	256.847	102.9
Trial 3	419.31	86.12	222.56	91.3567	28.1133	90.62	218.607	17.3467	183.657	33.2867
Trial 4	207.533	47.3367	13.8667	80.47	229.267	29.5333	239	27.5167	151.44	43.8833
Trial 5	57.51	46.2267	267.027	29.4067	75.3767	17.72	37.8067	25.88	134.47	118.743
Trial 6	198.573	119.973	38.2067	71.62	57.85	75.9867	400.597	118.583	452.467	379.217
Trial 7	232.283	48.1567	428.28	16.49	205.17	7.38	39.6267	46.6867	705.397	81.5967
Trial 8	122.583	24.8267	430.703	17.7367	274.863	98.5367	133.71	140.713	40.3433	122.477
Trial 9	210.597	239.16	34.0367	11.9667	222.787	28.89	99.3567	128.25	213.027	241.85
Trial 10	91.72	48.81	26.4933	15.2533	231.257	34.9967	102.443	42.0867	405.613	350.677
Group3_Activity
BL1	349.99	228.429	442.407	200.942	406.367	255.937	413.707	251.34	356.732	352.814
BL2	3.58648	6.8613	5.59315	53.2204	119.176	13.8304	117.457	7.90259	35.5296	8.85
Group3_Activity_CS1
Trial 1	274.523	256.63	222.43	205.997	334.047	149.337	451.7	388.86	363.743	413.163
Trial 2	10.5	63.6833	131.767	103.21	108.997	45.18	254.767	208.563	220.277	192.393
Trial 3	11.3167	11.2367	4.52333	33.65	135.823	9.27333	124.673	82.3967	72.03	136.297
Trial 4	41.0433	3.40667	10.7467	21.5933	298.637	115	107.933	7.32667	38.7133	31.8267
Trial 5	0.893333	96.0867	0.963333	25.7767	194.193	2.45333	123.773	12.6233	0.37	23.6767
Trial 6	2.53	3.45	4.38	99.0067	53.9167	1.17333	206.3	9.79667	21.1267	15.26
Trial 7	0.006667	17.1833	1.80333	22.7067	162.973	163.18	38.54	0.003333	67.12	8.22333
Trial 8	0.243333	4.93	104.203	12.48	11.8533	15.38	11.1333	0.176667	18.14	4.03333
Trial 9	0.313333	18.2067	4.63	72.86	26.14	71.78	8.96	0.86	161.857	4
Trial 10	0.173333	63.31	3.84333	10.2233	75.1833	3.35667	4.06	0.443333	15.7867	14.7267
Group3_Activity_CS2
Trial 1	272.237	139.897	420.67	186.783	321.083	194.363	381.943	201.093	409.613	250.14
Trial 2	45.7967	72.3933	296.04	71.9767	229.923	75.2533	304.25	297.587	185.353	98.3767
Trial 3	48.7367	18.6633	236.727	36.22	89.0533	118.793	146.077	54.9967	262.533	29.98
Trial 4	200.65	67.6867	219.81	80.4967	449.143	71.7	369.137	185.79	45.3067	41.62
Trial 5	37.0267	71.9567	70.85	193.277	438.443	115.28	55.8333	77.1933	157.79	74.4667
Trial 6	20.28	51.8767	153.323	264.057	277.73	107.38	94.19	116.04	46.29	12.5767
Trial 7	14.9267	91.0833	255.597	174.473	244.02	85.5	18.1167	17.3167	410.247	68.08
Trial 8	100.94	138.107	44.5633	45.8833	236.09	76.31	28.0733	11.2933	56.9467	13.39
Trial 9	12.61	23.74	260.057	77.8133	203.86	329.457	38.1	9.87	193.147	66.3867
Trial 10	28.6433	63.7	194.823	32.21	299.6	162.283	34.59	11.9033	321.79	20.8467
Group1_EscapeScore
Group1_EscapeScore_CS1
Trial 1	-0.79301	1.24287	1.71951	-0.58274	-1.95286	0.422377	-1.26058	1.24517	-2.7107	-0.02638	1.66406	-1.299	0.323115	-0.56372	-0.35695
Trial 2	-0.44601	-1.1768	-1.40376	-1.19635	-2.44849	-0.53668	-0.339	-0.45138	-1.83259	-0.78232	-0.72499	-0.58899	-1.35647	-1.17816	-1.4624
Trial 3	-0.5054	-0.6031	0.125243	-0.08176	-1.43523	-0.27947	-0.07496	0.900421	-0.13569	-0.5234	-0.3752	-0.05423	1.55744	-0.99334	-0.7865
Trial 4	-0.11699	-0.0009	-0.08025	-0.09723	0.633691	-0.06268	-0.0332	-0.10125	-0.0538	-0.02965	-0.09897	-0.0201	-0.93452	2.26089	-0.23676
Trial 5	0.344505	-0.1466	0.000645	-0.0058	0.150517	0.90796	-0.01558	-0.50761	-0.01771	-0.08494	-0.04324	0.012996	-1.12148	0.028409	-0.03547
Trial 6	0.657051	0.000366	-0.05394	-0.02495	-0.06206	0.959363	2.24308	-0.156	1.30386	-0.02549	-0.04764	0.04841	2.27189	-0.18551	0.25224
Trial 7	-0.01022	2.27897	-0.02345	0.017154	0.009403	-1.09912	-0.0149	0.144269	-0.07559	0.024895	-0.23726	-0.3954	-0.07702	0.038927	-0.09925
Trial 8	0.296249	0.187884	0.025528	0.002755	-0.04429	-0.51636	0.033647	-0.02145	0.038357	-0.05858	-0.01301	0.034836	-0.05627	-0.0498	-0.01211
Trial 9	-0.01886	-4.5e-05	-0.02572	0.009438	0.253175	1.04237	2.00402	-0.02646	-0.00163	-0.02915	-0.01674	0.011452	-0.66714	0.012259	0.1025
Trial 10	0.068344	0.0165	-0.01294	0.531473	0.187381	-0.04979	-0.00901	-0.01819	0.47984	-0.01686	0.002048	-0.02864	-0.73093	0.05243	0.004917
Group1_EscapeScore_CS2
Trial 1	0.312078	0.031342	0.140909	0.535029	-0.07884	0.015832	1.29248	2.86916	-2.17921	0.845878	-0.76451	-1.88807	0.814478	1.01113	-0.37798
Trial 2	0.802561	-1.49264	-0.07443	-0.29692	-1.14922	-0.57691	3.78495	0.522636	-1.11645	1.44924	-1.5614	-0.50786	-3.53002	0.137192	-1.34263
Trial 3	0.224402	2.66518	-0.22084	2.92233	-3.20261	-0.25831	0.096004	2.00238	5.70338	1.72328	0.203177	0.183042	0.089064	3.02081	2.09456
Trial 4	2.93228	5.55119	3.79155	3.23543	5.82582	-0.04052	0.076335	2.62373	5.73926	15.5646	-0.02727	0.367708	3.8605	10.631	0.339453
Trial 5	0.723973	0.108782	0.244134	6.566	4.15105	1.94165	0.37077	4.6588	4.27323	5.64944	0.301708	4.24432	1.70049	9.64369	0.132404
Trial 6	3.97061	3.05535	4.90881	6.60116	10.2751	-1.00612	10.5998	4.57118	9.00124	0.112981	0.194585	3.3113	5.41741	11.3619	4.60317
Trial 7	6.9932	5.90781	2.11287	16.9025	9.48017	3.91055	6.4649	6.97457	6.71145	2.1819	1.67151	3.33613	8.19112	5.19002	0.547558
Trial 8	7.1017	7.53151	3.76231	14.146	14.7449	5.62746	0.236105	5.74972	3.47836	4.43006	3.59154	2.60749	10.3036	10.8615	1.86842
Trial 9	2.73187	7.16078	5.83697	7.22588	6.46517	9.63982	11.727	5.88732	4.89269	3.77737	0.204792	3.38537	7.02708	15.1507	8.92549
Trial 10	10.2305	3.80447	3.78241	12.9045	7.21482	6.56602	9.46753	7.71351	9.82526	13.7892	2.11374	0.438467	7.22688	9.09921	5.35877
Group2_EscapeScore
Group2_EscapeScore_CS2
Trial 1	0.001014	-0.00028	-0.27782	-0.73554	-1.03409	0.03629	-1.11381	-1.15406	-0.67055	1.75409
Trial 2	-0.74875	-1.00603	-1.75833	-1.14362	-2.39101	-0.70578	-1.03225	-1.33362	-1.54956	-1.65289
Trial 3	-1.07916	-0.24186	-0.17513	-0.97482	-0.33954	-0.31905	1.17763	-0.08406	-0.19031	-0.168744
Trial 4	-1.42543	-0.05743	-0.02223	-0.08529	-0.05536	-0.0401	-0.07649	-0.00638	0.856089	-0.00904784
Trial 5	-0.24531	-0.05268	-0.00846	-0.14757	-0.03603	-0.01977	-0.07968	-0.00293	-0.29636	-0.00294522
Trial 6	-0.35195	-0.13589	-0.05386	-0.12623	-0.10529	-0.13713	-0.88662	-0.00647	-0.67539	0.0929951
Trial 7	0.089741	-0.04812	1.82915	-0.10181	-0.03561	-0.00421	0.067105	-0.01262	2.18434	3.34138
Trial 8	3.12633	0.008174	2.01192	-0.00398	3.53381	-0.01573	-0.11982	0.014122	-0.09999	0.00554441
Trial 9	0.153801	-0.00749	-0.00705	-0.02723	-0.16961	-0.02047	-0.08235	-0.21687	0.031506	4.9605
Trial 10	0.003154	0.346669	-0.06806	-0.00481	-0.03341	0.06261	3.07382	0.043567	3.38132	0.827973
Group2_EscapeScore_CS1
Trial 1	0.381821	-1.63107	0.102944	1.30716	3.04274	-0.82675	2.76618	1.50667	6.11083	2.79567
Trial 2	4.59701	0.63396	-1.07372	-1.13425	-0.32222	0.256502	0.507988	1.28887	1.3104	0.266277
Trial 3	3.97224	0.556319	4.81104	0.777042	-0.08149	0.526199	3.00332	0.068584	0.058932	0.153148
Trial 4	0.635656	0.365151	0.115997	0.681963	5.22862	0.24686	4.27472	0.267882	0.944496	0.404012
Trial 5	0.317645	0.405263	4.65295	0.145388	0.715202	0.142527	0.296888	0.254744	2.80498	2.18031
Trial 6	2.48199	1.00423	0.327002	4.58756	1.47073	2.61993	7.10655	3.16548	9.60759	9.7742
Trial 7	6.28788	0.422922	8.49909	0.051078	6.00693	0.069115	0.34374	0.446536	15.6123	2.81776
Trial 8	2.23461	0.221127	10.1919	0.171938	6.69672	2.96356	2.21156	3.39655	0.301971	1.21957
Trial 9	4.10351	7.21842	0.246372	0.091733	8.04986	0.267496	0.903429	3.06078	5.06984	3.41116
Trial 10	0.913653	0.467289	0.195507	0.119774	7.27144	0.337672	0.884304	0.411669	9.04007	8.50774
Group3_EscapeScore
Group3_EscapeScore_CS1
Trial 1	0.233528	0.136457	-1.57097	0.52629	0.596301	-1.26812	1.72603	1.99358	1.44922	0.264861
Trial 2	-0.02268	-0.06121	0.363735	0.3966	-0.17482	-1.13223	0.762934	0.513073	-0.75564	-0.33535
Trial 3	0.072291	-0.13538	-0.10626	-0.67995	0.616085	0.064789	-2.1555	0.004138	-1.8028	-0.16464
Trial 4	0.341478	-0.12831	0.060151	-0.06283	0.36982	1.04822	-0.68618	-0.18921	0.127151	-0.02099
Trial 5	0.007794	0.888139	-0.02984	0.074934	-0.00776	0.018747	0.634702	0.08052	-0.23346	0.123936
Trial 6	0.02112	-0.15724	0.031657	0.209839	-0.15475	-0.00242	0.518844	0.044977	-0.20289	0.121937
Trial 7	-0.00056	0.170929	-0.00384	-0.03989	1.17423	3.56521	-0.07335	-0.01255	-0.63737	0.048531
Trial 8	0.000694	0.045496	1.0322	0.052665	-0.116	0.144821	-0.02391	-0.02363	0.172418	0.014517
Trial 9	0.003123	0.161395	0.039375	0.384293	0.185681	1.71436	-0.01333	0.008505	1.48197	0.014329
Trial 10	0.001683	0.592317	0.028372	0.028317	0.622476	0.008816	-0.0132	0.001977	0.157298	0.09818
Group3_EscapeScore_CS2
Trial 1	0.237811	-0.03296	3.4225	0.34842	3.42394	0.135198	3.9843	2.13614	3.82043	-0.45985
Trial 2	0.330145	0.013611	2.99448	0.064964	1.00402	-0.82589	1.27842	3.41267	0.897609	-0.27711
Trial 3	0.445203	-0.0596	3.21211	-0.64715	0.15623	1.15632	-0.93832	-0.26872	1.10697	-1.22301
Trial 4	1.93386	0.510645	4.14379	0.52133	1.849	0.626553	4.92562	5.59095	0.196094	0.078562
Trial 5	0.367925	0.645868	0.669149	4.77019	4.50151	2.14449	-0.04088	0.724146	1.33764	0.629657
Trial 6	0.198026	0.325974	4.51613	5.87767	3.08802	2.0564	-0.6	3.10388	0.047451	0.09506
Trial 7	0.148149	0.907673	5.52508	3.47685	4.99179	2.79093	-0.27339	0.159991	3.82577	1.64866
Trial 8	1.00431	1.37702	0.42428	0.386319	4.12045	1.75378	0.144778	0.087136	0.559186	0.107844
Trial 9	0.125681	0.216655	6.58428	0.434434	2.95689	8.2826	0.277179	0.098305	3.79282	2.63653
Trial 10	0.285471	0.596294	4.93182	0.246905	6.85244	5.59277	0.291029	0.116193	4.20716	0.161641

## Sheet: Motion traces_G1
	G1_Trial1																G1_Trial2																G1_Trial3																G1_Trial4
	Mouse 1	Mouse 2	Mouse 3	Mouse 4	Mouse 5	Mouse 6	Mouse 7	Mouse 8	Mouse 9	Mouse 10	Mouse 11	Mouse 12	Mouse 13	Mouse 14	Mouse 15		Mouse 1	Mouse 2	Mouse 3	Mouse 4	Mouse 5	Mouse 6	Mouse 7	Mouse 8	Mouse 9	Mouse 10	Mouse 11	Mouse 12	Mouse 13	Mouse 14	Mouse 15		Mouse 1	Mouse 2	Mouse 3	Mouse 4	Mouse 5	Mouse 6	Mouse 7	Mouse 8	Mouse 9	Mouse 10	Mouse 11	Mouse 12	Mouse 13	Mouse 14	Mouse 15		Mouse 1
Time	1057	320	386	51	703	138	346	224	606	566	67	267	324	92	1020		19	245	86	109	1196	136	0	199	0	52	274	287	184	157	39		17	17	0	54	330	13	0	110	9	168	121	0	245	387	96		0
|	782	367	426	3	948	161	714	246	537	484	92	399	406	26	709		20	252	45	102	1262	96	0	223	0	4	211	328	259	132	3		24	40	14	70	840	20	0	86	4	163	151	0	251	502	214		0
|	398	141	587	12	1120	243	823	274	617	123	188	282	476	64	600		24	491	135	115	818	39	0	229	0	67	182	258	140	111	4		16	48	6	37	934	60	0	132	10	68	243	0	214	632	261		0
V	252	111	724	14	833	237	838	122	684	455	225	289	327	4	579		2	786	149	104	687	69	6	181	0	19	122	151	31	171	0		14	19	29	56	501	70	0	147	1	92	120	0	270	620	246		1
	398	141	767	112	374	133	886	119	656	81	160	330	181	86	535		119	1027	102	90	588	91	13	158	115	59	157	117	188	214	29		52	25	19	24	554	89	0	91	4	38	73	0	325	484	124		0
	508	123	601	31	226	119	871	84	746	400	181	358	181	76	405		235	995	113	51	391	22	11	175	253	46	165	30	227	277	0		46	46	0	34	732	62	0	147	2	84	128	0	383	262	296		0
	539	229	645	48	389	194	781	120	806	674	236	320	380	56	323		131	510	242	3	546	40	32	74	343	23	206	52	162	284	34		55	123	21	4	871	62	0	107	0	87	138	0	305	129	355		0
	528	352	605	33	580	317	966	151	1071	487	97	285	512	10	399		82	454	168	10	639	6	34	77	415	54	135	37	58	336	100		75	54	2	10	599	36	0	53	2	54	170	0	83	103	313		0
	600	444	680	55	654	171	1058	251	985	292	115	277	429	10	679		56	431	109	62	736	44	25	18	447	57	145	27	103	310	54		39	12	14	27	404	92	0	66	6	65	121	0	162	93	315		1
	708	473	493	142	486	363	932	259	992	206	32	168	358	130	1012		37	503	111	89	768	43	61	49	429	38	128	20	232	293	8		55	12	25	45	355	40	0	56	14	92	136	0	73	129	292		0
	724	457	594	34	1008	116	879	321	995	260	131	117	99	155	1315		109	431	143	80	866	1	41	60	395	163	152	3	59	312	25		138	48	12	16	112	83	0	39	0	76	130	0	108	213	282		1
	798	581	648	48	1194	130	767	284	1042	432	209	112	401	130	1485		48	380	78	4	832	24	82	106	265	167	154	10	74	256	4		180	28	0	9	236	55	0	22	0	18	89	0	116	184	272		0
	640	694	547	36	856	111	738	293	837	617	265	121	404	111	1413		74	234	106	119	870	17	82	78	186	92	183	2	92	246	41		151	1	0	0	555	103	0	85	2	44	18	0	40	152	217		0
	497	578	534	39	1420	57	900	264	724	520	267	85	312	50	1196		70	416	154	211	796	3	40	21	158	40	193	9	160	158	15		156	50	1	11	821	101	0	68	0	94	43	0	142	155	214		0
	222	622	614	46	1398	238	935	336	783	415	283	115	268	111	1292		97	613	72	213	472	0	0	18	250	140	194	0	345	211	24		180	31	0	7	970	10	0	82	1	89	82	0	167	122	213		0
	130	556	690	26	1137	321	832	271	838	88	293	70	53	70	1151		28	659	193	216	275	0	10	24	313	177	109	3	494	115	32		192	45	19	18	856	0	0	79	0	69	107	0	458	99	211		0
	157	554	931	5	1128	70	840	271	770	304	331	109	203	46	955		12	630	98	291	155	0	28	15	369	150	206	29	522	181	52		170	31	5	25	882	0	0	44	4	28	41	0	521	77	100		0
	50	553	830	109	1084	226	811	240	665	420	335	227	30	81	705		0	159	81	252	306	1	5	16	221	121	294	27	531	151	73		269	18	0	5	688	10	0	52	0	21	84	0	552	67	146		0
	82	693	660	30	1305	490	721	226	711	546	362	244	92	201	412		3	518	120	185	474	17	0	15	119	51	360	29	241	181	63		308	2	6	0	630	30	0	44	7	48	67	0	666	20	311		4
	62	523	568	12	1007	397	687	261	768	666	642	139	148	185	244		0	629	116	102	381	7	1	31	178	43	226	37	332	580	30		465	0	2	0	386	106	0	41	2	53	47	0	753	40	294		9
	83	441	514	8	1156	170	668	193	934	607	291	228	105	408	370		0	654	117	84	382	3	0	58	195	47	260	34	146	701	66		173	0	0	0	324	37	0	67	0	5	15	0	650	32	238		30
	84	377	457	19	1231	152	519	95	810	316	197	208	173	530	469		0	714	33	29	348	20	15	26	152	45	250	12	230	375	49		315	0	0	5	287	70	0	97	0	12	66	0	591	12	198		1
	122	398	418	36	1216	35	520	220	873	249	215	204	209	565	488		0	735	43	25	364	14	20	28	48	27	157	32	262	275	4		357	0	0	3	404	60	0	154	0	0	36	0	700	27	146		18
	56	455	584	0	748	162	518	346	695	301	400	194	106	542	408		0	927	58	129	359	37	9	125	89	81	177	70	283	399	50		266	0	14	12	208	1	0	204	0	16	35	0	518	28	185		14
	122	494	635	15	745	248	484	369	744	328	475	129	269	532	202		0	901	75	74	397	0	20	132	173	12	128	69	281	389	21		157	0	2	8	481	0	0	173	0	64	65	0	521	40	155		10
	190	407	626	3	725	236	487	244	874	495	437	315	103	435	225		0	689	46	112	261	14	8	97	268	38	99	97	229	492	40		245	0	0	29	280	0	0	120	0	6	40	0	346	13	177		92
	198	281	618	0	489	215	483	85	887	52	562	418	135	427	204		0	487	22	78	128	4	0	70	233	29	114	110	182	482	8		294	0	0	0	284	56	0	83	0	59	21	0	218	3	337		37
	224	217	552	0	749	158	405	78	999	414	427	538	302	460	347		18	317	90	93	138	1	0	70	212	11	252	148	360	473	46		411	0	1	0	449	39	0	44	0	42	4	0	252	5	421		25
	118	278	316	39	838	151	455	22	1055	467	418	474	69	544	278		291	365	197	55	304	22	0	59	255	34	205	136	623	421	62		443	0	0	0	548	9	0	146	0	20	31	0	274	4	400		111
	36	274	273	111	781	43	321	39	943	607	378	444	204	563	274		361	451	172	62	394	85	0	57	317	33	226	113	970	607	37		442	0	15	0	522	64	0	143	0	15	35	0	169	32	288		93
	395	260	502	11	575	56	155	22	1054	421	399	282	184	482	379		236	330	160	126	332	69	8	104	299	110	160	137	781	696	0		550	0	1	0	566	20	0	120	0	30	21	0	137	69	182		89
	783	247	566	26	247	33	118	3	983	634	455	293	54	497	198		164	286	148	96	211	5	5	151	254	83	117	146	641	733	43		543	0	3	5	779	79	0	67	0	82	8	0	147	33	289		72
	1071	180	583	16	411	43	61	22	997	448	461	222	70	441	29		132	303	92	55	177	17	36	39	230	116	173	123	813	734	29		349	0	0	0	962	99	0	70	0	115	17	0	254	9	374		206
	887	147	706	11	403	35	149	127	928	771	647	209	23	294	158		57	154	95	65	150	22	57	32	200	122	121	55	498	460	0		186	181	0	24	981	109	0	140	0	76	13	0	282	2	392		184
	64	202	579	2	1105	43	233	5	975	810	598	127	23	273	501		33	147	105	82	148	115	100	1	215	24	43	107	501	236	33		61	202	2	0	694	20	0	115	0	32	21	0	399	42	212		214
	206	174	473	7	1391	42	193	58	857	744	304	143	17	287	814		62	236	45	90	138	133	13	85	214	27	16	36	506	159	21		60	144	14	0	343	38	0	104	0	22	20	0	575	49	114		254
	295	174	318	9	1491	39	333	40	742	420	371	121	32	318	959		204	324	56	63	65	121	25	50	144	44	156	70	588	718	0		62	126	24	0	374	42	0	51	0	27	0	0	616	52	43		25
	670	166	242	12	1665	81	177	9	699	224	480	124	199	226	1066		196	380	30	19	148	101	18	137	206	19	221	20	474	984	51		192	123	37	0	238	56	0	33	0	43	10	0	466	32	14		172
	1012	166	360	1	1369	45	187	24	480	323	590	39	231	223	1061		159	383	123	89	20	129	28	124	106	88	243	23	486	1031	42		246	113	33	0	738	0	0	20	0	7	32	0	181	44	105		146
	987	122	312	0	1405	78	251	50	550	88	740	88	80	119	957		14	608	183	11	9	116	27	37	12	50	210	37	372	767	0		334	93	16	1	622	41	0	25	0	11	37	0	179	9	90		66
	1061	183	256	0	1370	17	247	88	358	161	871	75	168	93	726		74	620	213	26	26	28	8	154	41	28	233	49	261	711	35		435	120	0	0	280	12	0	34	0	8	69	0	206	1	47		25
	1135	120	261	0	791	18	199	104	462	436	969	87	13	35	755		4	597	113	40	45	87	3	80	111	33	212	32	81	483	8		374	210	11	0	127	7	0	0	0	11	54	0	244	10	126		67
	820	144	499	0	386	27	191	289	354	1137	812	24	100	81	788		10	519	153	40	132	97	10	28	84	37	168	29	213	191	0		178	197	21	1	417	87	0	0	0	50	13	0	198	1	61		145
	468	114	246	13	319	48	432	381	603	1648	880	265	97	41	744		4	633	127	26	82	87	5	14	41	65	170	26	105	328	25		150	153	32	40	458	48	195	0	0	77	17	0	143	0	16		177
	453	90	311	36	485	4	325	421	1027	1773	946	291	76	18	696		6	615	78	32	8	51	0	53	324	8	162	16	284	436	4		201	98	53	0	366	0	68	1	0	53	20	0	227	4	88		112
	259	83	275	3	729	23	222	358	1454	1810	764	348	107	217	756		21	619	68	57	126	3	19	69	492	11	109	28	152	541	0		210	73	27	0	434	44	15	2	0	62	80	0	197	1	69		134
	153	103	332	23	839	19	374	384	1522	1671	417	323	85	306	858		23	600	108	134	150	11	9	8	411	22	83	24	204	565	0		237	49	5	23	627	2	18	5	0	120	16	17	63	6	65		224
	165	67	328	62	899	41	464	368	1480	1909	240	240	204	253	756		26	428	202	108	163	32	0	16	353	13	49	6	338	425	0		255	2	16	22	536	26	29	4	0	78	39	38	290	0	122		169
	247	27	348	20	1099	89	292	345	1480	1356	429	283	423	226	432		25	386	193	100	187	29	0	14	291	43	191	6	138	301	13		189	28	3	9	508	4	1	4	0	29	63	46	262	1	162		92
	299	36	236	4	1060	88	511	240	1448	959	445	375	343	170	452		9	335	270	109	158	1	30	46	263	0	192	16	125	362	24		170	34	20	5	460	4	0	3	0	13	61	22	211	2	246		81
	273	18	183	0	985	24	275	133	1498	723	201	375	408	102	488		5	546	256	146	128	19	33	12	282	16	292	41	381	633	102		225	47	20	0	204	44	0	0	0	14	44	9	144	1	199		35
	205	47	192	4	719	11	266	362	1392	625	318	403	517	132	296		6	512	353	91	214	26	55	35	319	32	175	18	334	713	102		240	148	45	1	233	6	5	0	0	69	14	5	204	1	161		39
	252	49	248	0	735	65	255	379	1187	661	323	307	264	201	633		40	484	272	218	234	15	23	14	347	18	36	6	525	714	25		291	116	2	1	116	10	9	0	0	102	53	23	143	0	211		99
	235	50	253	0	710	44	281	393	1021	432	473	352	88	185	917		10	372	192	305	273	16	21	0	297	31	24	19	321	641	5		337	214	63	0	307	55	8	0	0	130	62	8	188	0	260		86
	201	39	412	4	793	5	312	392	891	422	400	359	56	92	1160		10	320	211	383	347	42	39	7	281	20	54	9	505	703	40		243	227	12	0	187	4	4	56	0	126	19	7	123	3	273		53
	56	15	446	91	1014	2	114	476	927	360	450	378	204	106	1063		31	185	237	256	309	70	14	0	320	32	42	12	450	579	103		218	139	0	0	243	28	2	295	38	106	21	22	249	3	308		48
	98	20	320	88	996	12	200	527	951	46	297	415	286	65	1131		3	173	161	391	296	57	49	20	365	30	55	49	407	419	151		153	103	24	0	172	14	0	219	69	176	18	17	269	1	346		42
	56	28	244	37	631	0	372	478	788	306	291	519	179	75	935		37	165	159	378	154	90	16	32	389	40	240	79	529	265	99		23	171	37	0	393	70	0	50	33	147	8	17	295	0	284		23
	43	2	150	9	600	20	335	181	260	189	189	574	210	18	727		32	201	199	415	194	143	20	0	284	46	223	58	748	428	72		0	145	9	0	513	104	0	85	83	34	33	11	337	1	278		49
	20	21	145	38	673	48	360	217	452	325	196	561	383	83	771		74	63	181	386	229	55	29	5	297	140	154	61	940	797	8		1	62	41	0	435	23	1	129	48	50	36	13	329	0	300		49
	19	15	94	22	356	1	394	118	595	302	443	518	553	117	966		127	71	169	390	314	109	3	34	242	177	169	49	900	874	53		47	22	56	0	402	122	4	124	12	27	68	26	308	0	345		66
	34	17	216	20	270	3	540	463	616	175	566	572	733	77	1064		133	48	248	458	362	59	0	0	265	156	120	118	789	741	34		42	70	16	0	503	66	2	54	36	53	68	51	62	0	513		68
	72	4	295	5	376	0	670	366	670	71	618	397	543	65	1509		63	96	285	406	323	142	2	31	282	121	147	117	803	891	6		36	93	45	0	706	60	2	77	64	45	42	34	296	0	515		6
	15	10	198	5	384	6	395	390	777	231	346	390	728	63	1209		45	185	344	342	301	145	71	424	265	134	136	123	507	951	49		39	47	29	0	703	123	0	57	82	42	50	24	548	0	416		18
	1	9	117	60	377	0	500	336	979	180	342	217	900	70	715		32	246	278	126	349	143	86	331	184	110	101	125	531	1015	136		10	74	72	0	548	99	0	69	63	97	45	3	636	0	353		21
	11	24	189	32	917	0	494	323	1309	205	394	254	821	63	771		76	180	259	205	350	112	82	205	248	161	98	196	245	855	93		50	154	60	0	458	88	4	46	60	96	40	5	394	0	241		13
	3	46	172	60	1433	1	668	341	1504	233	349	235	1255	7	926		57	247	122	217	122	63	52	135	326	156	101	207	567	816	53		133	193	38	0	473	155	4	49	62	68	42	2	264	0	172		7
	39	71	243	62	1424	9	489	290	1539	180	425	187	818	19	1072		16	288	142	223	119	67	143	175	255	138	85	122	493	1062	13		96	165	67	0	578	111	7	36	22	93	41	0	192	0	171		11
	52	43	154	46	1225	3	386	240	1315	267	365	175	751	21	1270		155	189	117	264	67	62	96	243	269	136	64	46	147	433	22		140	179	61	0	307	50	23	31	39	81	34	11	125	0	330		6
	67	79	107	153	1256	27	236	358	1362	218	344	189	512	2	1317		205	124	186	206	126	52	85	338	269	153	96	45	147	332	35		88	157	70	3	168	61	10	39	12	136	53	1	412	0	243		6
	111	125	215	191	1026	26	242	222	1378	207	157	250	565	30	1282		38	255	182	253	52	48	48	394	276	217	93	91	356	679	61		132	19	24	147	186	118	3	15	10	91	14	15	372	0	242		1
	53	111	258	152	805	14	254	239	965	212	294	332	637	198	987		79	121	97	188	106	15	29	378	202	274	169	12	415	705	108		163	84	63	204	233	181	11	27	15	70	6	15	362	0	296		1
	85	97	181	35	561	61	239	172	950	156	243	313	520	86	688		119	87	143	253	150	71	83	248	122	221	194	42	231	612	30		95	109	49	156	212	179	24	3	8	100	21	11	290	0	278		3
	12	75	197	59	741	75	176	118	642	337	304	302	869	128	848		93	50	91	237	195	69	80	288	150	198	260	20	271	133	65		52	25	45	98	225	143	64	44	2	16	127	16	304	0	232		0
	25	102	328	125	907	45	184	73	991	615	249	151	795	266	698		43	114	137	299	155	68	109	170	150	189	284	9	386	188	16		42	63	38	94	263	112	39	14	0	91	172	5	215	0	147		1
	3	75	492	30	766	64	334	123	891	637	260	530	610	220	700		82	19	142	257	63	83	116	231	189	116	232	44	295	346	11		96	26	93	56	256	79	0	9	0	8	48	1	318	25	217		1
	13	117	689	114	386	54	284	119	736	438	249	444	427	198	1031		61	41	55	56	151	59	26	345	185	22	170	20	139	341	75		69	148	60	42	336	85	1	21	1	62	18	4	335	3	57		0
	10	166	722	432	632	75	150	208	899	505	129	364	405	272	1162		101	57	105	55	147	21	158	637	397	39	149	80	305	166	56		228	79	64	66	340	78	31	30	1	87	0	0	290	1	20		0
	15	239	800	369	620	126	117	345	982	402	326	413	377	351	1301		36	62	19	82	158	0	102	814	337	35	93	101	177	491	55		284	19	83	54	331	56	4	11	1	42	13	7	358	14	22		0
	5	220	738	482	681	144	140	267	742	273	424	482	342	295	1228		25	56	42	146	126	10	13	722	327	48	119	130	130	508	10		346	113	24	97	220	22	1	29	0	21	2	22	363	45	50		0
	6	145	749	525	555	104	89	54	623	241	417	544	594	228	843		17	13	19	201	157	25	45	434	330	149	134	176	136	568	17		308	33	38	127	267	84	0	6	0	55	193	8	338	32	103		0
	0	123	1081	664	127	194	95	30	517	147	443	682	443	326	660		0	1	13	226	257	13	48	312	420	184	123	152	51	231	75		322	8	37	112	419	125	18	4	0	63	167	0	296	49	30		0
	3	205	1213	556	285	162	88	79	613	43	476	683	440	288	499		3	25	13	154	338	49	0	323	316	143	148	175	98	261	31		295	1	9	70	446	170	0	45	0	92	123	1	285	59	25		0
	7	245	1066	661	422	101	32	216	485	160	458	822	416	151	513		21	101	4	30	298	20	0	288	422	215	147	186	171	205	20		87	62	26	64	411	144	7	46	0	2	327	0	276	55	117		0
	5	99	1036	474	343	159	107	165	374	93	360	857	360	123	508		39	20	4	48	247	29	0	215	590	248	50	228	498	170	52		80	7	19	12	233	111	5	110	0	54	279	0	233	76	85		0
	0	58	1009	568	553	283	90	134	221	193	343	708	400	166	437		39	48	27	41	184	4	0	177	607	250	123	249	799	211	7		118	26	24	34	156	53	2	132	0	47	91	0	142	44	214		0
	12	81	930	628	788	321	20	114	228	165	508	465	348	81	355		27	92	86	96	166	19	0	212	553	182	233	274	618	365	4		193	0	4	18	105	113	0	95	0	54	96	0	141	54	251		0
	0	187	750	486	773	349	123	127	152	81	348	331	314	93	469		16	42	3	82	81	80	0	261	582	227	270	269	653	621	60		316	14	48	17	110	44	10	89	0	1	71	0	280	28	241		0
	2	147	802	496	880	383	106	45	127	76	389	392	424	63	524		60	11	17	123	168	67	0	241	577	256	270	243	547	883	60		311	47	0	9	187	8	2	82	0	69	57	0	271	11	135		0
	88	283	1105	542	793	234	37	76	433	45	280	531	420	58	725		32	14	35	186	127	55	0	257	612	260	222	270	325	521	5		219	42	29	4	147	8	0	100	0	25	97	0	382	75	207		0
	201	287	927	352	869	248	22	185	335	65	142	606	463	34	645		110	75	49	429	103	96	0	278	634	277	69	215	202	622	51		132	0	29	13	175	21	3	121	0	3	145	0	354	93	240		0
	235	306	757	291	558	148	42	378	197	60	488	537	463	74	764		47	33	105	545	205	96	0	217	746	338	91	226	440	657	16		96	16	104	9	133	39	1	126	0	51	123	0	410	73	300		0
	267	313	904	307	765	127	32	390	99	94	185	444	682	259	691		60	156	159	544	195	92	0	281	878	269	181	260	417	773	0		50	10	94	11	130	35	1	138	31	39	104	0	218	32	340		1
	195	271	757	220	641	161	53	159	376	31	257	477	758	339	737		131	22	147	511	227	85	0	239	1025	303	229	273	530	1007	61		66	2	90	1	81	72	5	92	10	132	61	0	57	70	401		0
	332	250	652	220	401	114	28	101	169	59	122	350	755	534	905		101	151	263	392	164	79	0	144	920	372	148	310	424	840	50		41	4	114	12	268	110	36	74	47	77	72	0	77	75	402		0
	395	270	637	160	464	105	106	85	269	219	240	362	841	493	922		61	204	181	260	146	42	0	189	657	340	186	278	489	709	43		24	0	94	22	328	37	22	65	51	137	141	0	109	90	239		0
	462	321	661	93	254	167	110	153	433	59	68	388	866	458	1019		31	320	197	210	111	69	0	182	559	354	97	177	713	1000	15		26	1	85	40	334	39	5	15	49	29	57	1	114	73	219		0
	674	351	614	253	300	216	153	256	157	81	293	103	1034	489	882		4	401	363	320	86	75	0	122	576	351	135	131	636	1006	18		125	3	50	23	347	88	0	59	26	106	84	6	165	52	212		0
	406	267	592	409	148	258	79	89	79	9	274	223	812	543	815		26	350	493	228	59	94	0	90	549	339	191	93	542	763	62		125	0	41	0	341	19	0	87	32	8	23	8	179	15	257		0
	323	227	385	101	113	142	115	60	50	66	259	517	758	658	1262		4	402	553	99	96	121	0	137	606	325	207	115	230	1019	15		127	0	98	17	486	98	0	51	8	79	101	3	256	6	213		0
	248	214	354	117	82	81	61	319	143	7	293	752	395	793	1022		0	457	413	43	145	111	0	87	469	320	199	20	148	866	38		90	0	87	15	541	66	0	11	5	68	58	0	267	0	322		0
	375	230	230	133	182	65	37	315	315	19	392	785	153	671	978		5	310	322	63	73	85	13	226	381	362	142	59	445	462	45		70	0	92	0	444	47	0	1	9	63	44	0	267	62	258		0
	374	364	192	153	494	106	43	221	375	15	492	814	454	495	758		0	244	441	67	9	62	53	441	393	373	122	77	457	213	13		60	0	96	3	524	48	0	27	1	61	74	3	168	29	404		2
	397	309	131	193	150	147	278	83	290	103	587	679	325	357	793		0	303	347	66	15	103	32	469	472	335	150	44	408	339	14		24	1	57	1	604	26	2	66	3	100	50	0	162	33	404		0
	368	217	142	129	430	253	303	91	428	291	550	568	175	455	660		5	397	311	136	114	81	24	367	373	313	81	62	297	133	38		17	0	48	2	673	16	9	59	0	118	46	1	312	27	514		0
	424	285	177	136	56	286	164	82	434	294	391	767	160	368	544		52	280	350	167	153	81	69	444	349	261	141	29	222	380	12		12	0	120	3	594	3	29	40	0	101	47	1	173	23	474		0
	233	313	116	59	444	277	172	88	611	269	364	600	312	141	576		138	368	462	219	121	64	35	539	445	248	156	49	420	468	34		70	0	50	2	665	19	4	34	2	89	102	0	307	31	364		0
	416	269	203	322	377	204	68	97	413	456	479	444	530	80	648		98	316	361	207	57	144	40	684	257	253	66	30	630	793	0		28	0	46	0	612	62	6	8	3	128	70	0	156	22	426		0
	566	418	151	74	7	200	18	375	691	736	229	370	788	86	850		155	306	150	169	50	173	49	604	242	142	190	30	1109	711	2		36	0	138	1	786	58	0	128	0	1	57	0	128	15	479		0
	514	481	43	28	395	289	7	302	919	914	308	239	723	18	1209		201	266	55	293	9	176	99	443	254	42	212	53	1037	497	82		26	0	149	5	710	8	0	131	1	76	76	0	100	21	172		1
	447	472	191	20	85	183	1	327	775	1304	409	178	784	108	1227		366	256	154	294	7	182	118	422	149	35	211	51	740	478	16		6	0	147	1	514	26	5	54	4	28	63	0	60	12	209		1
	349	364	157	49	388	91	2	322	494	1111	414	126	820	84	1260		353	250	151	236	4	216	3	390	142	32	61	54	910	399	36		33	2	117	0	535	11	0	29	0	9	83	0	4	13	81		0
	412	575	96	19	334	67	155	326	1003	1298	153	206	883	40	1144		284	284	178	216	5	205	26	215	133	46	120	37	834	401	4		43	0	78	0	522	17	0	20	0	94	149	1	27	19	161		0
	478	539	164	0	330	117	254	272	1312	1336	160	155	1039	80	1053		246	332	129	163	45	158	93	216	46	33	227	6	1067	430	65		5	0	106	45	420	0	0	37	0	17	82	1	131	26	129		0
	437	510	209	42	201	47	70	105	1306	924	249	210	1017	181	1017		220	385	171	136	67	154	145	146	157	67	35	13	826	393	3		4	4	104	10	300	2	0	8	25	9	43	0	230	73	50		0
	470	306	195	331	342	59	136	164	1179	841	222	372	1049	113	948		211	344	347	117	46	166	57	93	135	237	123	15	708	197	5		36	0	75	7	205	6	0	0	0	22	98	0	247	26	41		0
	491	367	57	20	225	262	128	93	1238	1064	72	452	1084	109	944		359	428	349	97	73	112	54	200	117	208	190	69	811	220	19		45	60	85	16	295	21	0	66	1	79	33	0	341	8	50		1
	444	355	105	153	320	163	126	319	1534	1090	98	465	964	109	1076		415	470	420	55	51	126	123	290	113	102	92	33	881	253	1		33	61	42	3	97	9	2	136	0	113	147	1	385	9	98		0
	338	81	59	1	92	197	113	304	1576	929	85	445	985	227	1251		300	175	131	127	18	87	175	321	105	42	227	17	777	281	2		10	15	70	0	136	11	0	181	0	72	107	0	370	19	42		0
	492	139	84	2	607	63	14	223	1887	1113	217	394	1012	316	1146		237	159	138	85	5	80	24	394	24	46	48	2	537	315	28		23	18	101	4	187	0	0	27	7	113	88	0	444	14	28		0
	600	87	171	1	570	75	71	139	1828	885	236	330	988	69	1090		254	399	221	267	100	117	117	299	11	170	117	7	255	434	41		50	10	154	1	133	1	0	100	53	3	185	0	386	2	45		0
	649	82	56	226	425	65	13	181	1536	607	86	290	1092	253	1004		286	347	226	174	180	122	101	45	133	244	139	45	467	347	31		53	22	201	0	140	9	0	61	1	98	89	10	152	2	26		0
	483	35	98	4	249	113	57	263	1536	331	102	221	1097	115	1035		295	145	273	130	199	110	117	95	53	261	56	39	907	508	29		22	16	263	11	40	1	0	7	1	8	102	26	178	2	20		0
	387	32	134	29	457	132	7	209	1458	650	158	362	1135	137	669		273	111	226	146	46	120	156	82	121	191	140	185	603	422	14		18	109	384	12	96	3	0	4	2	28	16	0	117	3	98		0
	568	103	96	0	100	131	7	105	1643	835	166	527	1224	138	787		297	32	304	137	120	152	111	4	191	129	210	462	236	390	19		27	117	314	0	145	0	0	32	5	0	19	4	17	9	98		0
	645	5	130	7	178	12	106	137	1109	689	219	598	890	376	873		292	157	313	161	121	88	136	33	155	32	33	537	132	549	39		28	20	216	2	216	2	0	10	7	17	58	1	151	80	278		0
	509	29	232	134	344	126	344	48	822	711	201	727	1339	73	922		229	113	115	112	74	37	112	9	95	51	5	530	344	529	25		32	30	143	11	140	0	0	2	76	1	175	0	175	166	376		0
	502	62	251	192	192	167	419	81	613	863	205	944	1389	101	624		203	270	160	85	12	48	62	0	202	125	9	464	482	430	2		58	3	66	7	164	1	0	83	73	2	154	2	132	109	346		0
	314	101	186	340	85	29	403	81	518	640	103	982	1160	29	970		262	206	190	97	29	41	10	8	493	291	149	266	543	269	6		80	35	33	2	229	1	0	47	4	34	351	0	133	107	128		0
	442	35	229	111	155	66	320	130	249	500	188	677	739	39	751		319	102	218	27	76	73	0	6	517	483	190	174	453	157	7		141	2	71	2	175	3	0	34	33	1	285	0	145	145	166		1
	518	2	298	398	251	49	347	101	410	795	221	497	573	59	1135		168	124	233	90	82	127	0	0	493	537	77	196	203	86	1		347	22	10	5	170	0	0	95	9	2	194	0	108	46	132		0
	423	19	575	248	544	46	449	99	649	1160	68	404	705	278	833		93	59	242	131	57	121	0	0	489	538	10	148	122	78	7		244	63	87	3	267	2	0	56	27	18	155	0	76	87	155		0
	330	48	692	214	224	186	508	87	721	1286	138	559	845	369	614		181	92	323	89	27	24	0	0	452	530	50	144	297	35	16		177	27	200	2	204	0	0	25	18	88	205	0	101	61	75		0
	228	168	682	289	59	326	528	71	695	1154	55	467	900	409	638		288	154	393	132	34	67	0	0	482	478	133	69	79	74	0		79	79	182	3	154	8	0	30	2	64	173	0	123	15	143		0
	392	200	578	196	36	420	479	29	509	601	197	338	946	308	656		339	62	473	68	11	79	0	1	316	407	228	174	242	112	0		96	56	184	0	99	5	0	1	15	117	139	0	127	36	160		0
	338	239	334	145	98	358	532	168	689	401	149	566	1081	287	556		307	72	599	33	20	167	0	7	290	344	105	252	105	248	0		41	57	176	0	87	0	0	30	19	92	110	0	115	29	74		0
	474	129	182	61	110	264	647	192	824	454	158	698	1067	238	587		183	199	575	20	64	41	0	0	257	304	185	198	102	272	10		18	299	112	0	77	7	0	44	1	35	194	0	83	25	50		0
	353	180	202	47	138	170	550	90	649	377	198	556	985	411	428		269	166	474	15	138	170	2	0	283	298	143	92	277	270	4		25	384	41	0	97	0	0	25	0	123	70	0	86	108	57		0
	459	206	188	236	140	17	439	85	534	336	130	654	627	394	395		140	72	232	74	3	158	112	308	275	255	183	149	223	306	0		65	381	2	0	89	2	0	7	6	89	34	1	125	167	93		0
	535	138	281	109	112	55	347	123	448	152	299	565	615	256	261		213	151	339	24	123	171	120	366	503	196	210	71	355	337	11		42	235	10	12	83	4	0	17	14	39	0	0	133	178	61		0
	570	66	328	79	194	55	379	18	453	97	214	288	430	301	462		274	98	406	8	28	58	44	236	450	174	377	77	229	400	2		45	281	7	0	63	1	0	1	29	32	14	0	135	204	10		1
	534	51	206	123	528	14	307	13	492	148	174	360	482	60	418		295	84	263	14	71	85	142	245	411	188	213	34	80	393	10		31	286	0	0	43	4	0	14	31	9	17	0	77	72	33		0
	166	13	292	284	458	70	195	184	802	378	66	348	142	78	354		276	103	348	63	171	148	129	282	184	115	212	22	379	346	15		17	211	28	1	42	2	0	1	63	53	12	0	10	100	67		0
	88	64	376	3	198	84	62	255	1482	409	82	423	298	16	265		271	33	295	19	72	147	53	220	265	115	370	9	286	299	6		40	101	25	0	48	4	0	3	65	4	6	0	44	202	2		0
	76	88	474	114	445	67	41	242	1797	568	187	361	410	47	255		255	146	351	6	35	76	47	125	247	66	345	35	311	389	13		15	202	16	0	194	1	0	9	27	0	10	0	38	202	18		0
	144	314	461	7	423	62	17	211	2115	497	188	233	778	57	241		247	173	405	8	136	46	31	103	260	45	440	86	249	478	7		56	200	24	0	145	5	0	27	26	10	16	0	67	72	27		0
	235	315	413	27	35	102	50	100	1796	927	259	621	725	216	296		202	114	407	39	277	4	27	156	160	56	164	113	333	421	19		88	209	19	0	355	0	0	6	55	8	81	0	25	39	25		0
	147	264	256	301	198	80	20	109	1445	1214	372	362	1066	242	234		161	96	413	4	446	65	23	195	320	38	144	133	168	386	62		26	274	12	0	654	2	0	19	77	14	73	0	24	10	40		0
	189	247	40	137	171	61	52	52	1315	961	364	132	1554	81	262		225	282	430	54	552	30	54	123	385	36	161	122	216	466	49		49	376	0	0	751	0	0	1	6	1	21	0	119	33	13		0
	298	372	79	49	79	29	1	19	907	633	378	310	1276	179	125		378	54	330	40	628	20	0	53	295	71	115	149	290	305	17		40	259	153	1	863	0	0	0	3	36	40	0	24	5	40		0
	390	289	84	10	291	78	18	101	682	605	311	59	987	66	152		321	167	163	5	695	108	13	15	466	146	87	165	281	291	5		33	246	203	11	843	0	0	16	2	1	0	0	73	6	258		0
	679	406	113	175	271	68	1	26	803	929	383	155	937	65	82		107	57	102	27	663	55	19	1	169	169	141	146	190	219	55		6	122	139	20	835	0	0	46	9	35	10	0	43	20	296		0
	683	288	211	174	155	1	11	9	814	694	443	65	1023	47	342		46	17	170	43	640	11	2	0	215	66	148	134	54	222	12		38	193	46	18	467	1	0	32	3	0	7	0	9	0	137		0
	877	255	283	30	315	43	2	30	841	746	496	207	1077	37	291		121	41	362	41	615	68	13	0	276	88	351	188	324	249	33		156	196	18	7	626	0	0	81	5	11	2	0	0	35	158		0
	763	251	326	53	394	49	15	28	899	711	587	203	940	85	273		150	93	420	145	570	12	13	0	439	149	459	236	938	316	0		22	196	68	1	830	0	0	18	5	2	14	0	8	1	238		0
	713	193	346	60	462	45	112	41	959	652	543	43	706	113	258		65	107	161	137	378	27	4	0	485	130	507	229	829	377	1		21	210	64	19	663	5	0	14	1	21	2	0	58	30	231		0
	934	127	371	106	104	57	159	2	1152	539	672	38	598	313	230		155	39	237	78	546	104	0	0	276	131	139	202	623	400	70		29	220	86	6	720	3	0	43	0	43	5	0	23	41	306		0
	997	45	329	83	162	58	183	102	1291	455	570	88	780	438	109		270	262	113	116	637	85	1	0	452	66	320	205	342	493	32		57	200	111	0	659	0	0	18	0	50	5	0	31	51	351		1
	816	115	190	100	518	47	161	168	1321	736	652	107	516	327	61		259	271	92	34	552	85	0	2	472	57	194	155	548	557	8		82	235	153	0	536	0	0	24	0	16	0	0	31	193	366		1
	922	57	127	100	356	12	245	97	1269	593	853	24	455	388	60		269	85	108	88	527	6	0	3	343	32	198	173	487	356	2		83	236	130	6	539	5	0	86	0	54	0	0	9	250	352		0
	927	37	13	160	143	6	403	52	1165	491	771	27	496	185	201		201	72	103	58	584	2	0	0	240	53	264	217	376	466	4		53	375	92	0	661	25	0	19	43	60	4	0	9	316	173		0
	970	360	3	491	204	29	380	46	762	478	841	47	600	226	123		350	62	28	89	605	27	0	0	300	18	295	211	856	353	75		26	395	109	0	428	62	0	16	11	70	2	0	108	184	86		0
	1090	437	99	353	28	81	176	48	415	509	809	41	110	233	173		260	127	49	113	591	82	1	0	229	72	360	255	1207	138	34		81	324	11	1	303	64	0	59	23	64	3	0	131	177	78		1
	1265	483	65	295	128	56	112	22	744	397	712	72	374	97	155		207	142	12	113	701	64	8	0	275	64	307	259	1200	299	0		26	270	35	6	465	1	0	43	0	86	0	0	40	140	202		0
	1299	417	98	315	257	20	228	90	1255	260	630	25	541	70	96		262	281	99	105	630	2	18	0	154	51	105	356	898	114	2		29	111	90	0	389	62	0	10	1	32	0	0	61	66	150		1
	1244	454	113	271	152	32	289	90	1824	232	648	81	545	70	167		286	227	9	133	664	2	11	2	133	25	189	284	1023	262	3		17	146	35	0	131	32	0	11	0	70	0	0	8	148	127		0
	1222	622	121	136	568	6	512	88	1859	225	581	92	647	29	269		282	82	5	116	545	9	40	0	163	43	149	411	781	81	0		24	61	16	0	135	9	0	62	0	120	0	0	3	208	216		0
	1305	457	120	265	567	25	662	41	1969	102	856	374	704	282	251		307	9	63	187	600	7	10	0	322	125	191	445	710	235	6		42	98	91	0	117	37	0	39	0	46	0	0	22	253	213		0
	1383	231	176	471	285	71	728	35	1804	168	1139	534	638	297	191		334	31	29	182	457	35	0	11	437	27	174	429	870	264	3		31	140	114	6	204	37	0	16	0	77	0	0	54	179	319		0
	1308	52	127	508	298	86	819	10	1385	188	979	453	765	286	229		369	71	33	211	631	7	0	95	420	53	153	304	551	313	0		14	271	49	18	241	16	0	8	0	18	0	0	2	158	331		0
	1229	68	82	446	378	81	578	54	952	214	1068	554	529	186	270		321	81	4	250	683	14	2	476	399	7	214	309	755	326	8		150	263	36	0	323	58	0	64	0	86	0	0	15	147	188		0
	1506	194	105	487	448	8	219	52	763	224	936	468	485	165	367		245	30	25	238	470	25	0	497	373	21	141	369	711	387	0		128	285	12	4	297	70	0	52	0	72	0	0	58	190	185		0
	1490	63	127	596	611	11	190	39	880	267	674	442	610	268	459		168	91	16	273	368	31	0	405	341	101	259	408	523	197	0		108	310	44	0	549	67	0	39	0	23	0	0	34	130	51		0
	1377	184	51	411	931	29	125	39	706	205	693	413	570	342	365		168	4	8	262	317	13	0	432	269	85	346	464	889	235	17		50	191	11	1	589	67	0	35	0	70	0	0	32	113	51		0
	1266	382	174	546	1274	14	285	8	701	203	429	357	496	485	442		296	5	1	279	256	91	14	405	382	106	399	435	1010	287	2		14	215	5	0	480	29	0	41	0	30	0	0	0	147	4		0
	961	406	71	625	1189	75	204	105	525	197	396	739	561	577	512		271	63	15	259	382	85	3	304	336	100	478	481	820	200	0		60	201	10	9	329	32	0	15	0	90	0	0	2	184	31		0
	800	434	157	732	651	115	354	166	344	177	588	915	555	583	481		339	109	58	160	294	98	0	210	137	40	458	432	872	245	7		24	199	32	6	310	38	0	29	0	52	0	0	5	118	152		0
	602	257	105	729	383	26	451	24	368	130	387	799	1069	604	367		357	10	50	129	239	55	12	281	239	66	259	332	902	280	17		4	292	38	0	448	25	0	30	0	106	0	0	88	108	147		0
	454	197	50	713	603	96	265	73	275	178	227	737	1734	456	355		255	132	38	98	315	87	0	230	247	72	249	421	790	378	64		7	267	25	0	499	21	0	67	0	50	0	0	32	115	231		0
	538	190	76	1009	734	128	362	4	265	248	321	1117	2090	356	392		240	61	32	49	267	142	0	283	139	49	189	295	675	601	0		6	405	4	0	474	66	0	23	0	54	0	0	56	129	282		0
	483	85	96	906	535	144	414	31	511	190	644	1106	1417	425	500		115	340	18	22	242	17	0	305	193	58	135	342	723	525	0		55	455	29	1	459	72	0	58	0	89	0	0	8	169	310		0
	772	45	67	922	681	43	470	185	594	90	700	1052	338	328	715		87	252	19	37	213	78	0	229	202	105	113	258	1241	340	1		5	349	40	1	497	64	0	29	0	4	0	0	17	141	382		1
	709	66	0	827	610	108	486	203	510	69	324	720	354	323	728		179	257	30	68	330	78	0	199	173	78	73	196	1228	499	49		46	442	2	41	223	21	0	65	0	0	0	0	11	279	366		0
	547	59	48	897	428	100	294	121	736	114	308	782	339	208	709		257	233	42	237	448	0	0	243	205	45	29	265	1289	813	4		36	482	0	85	433	33	0	39	0	1	0	0	12	289	333		0
	540	26	16	908	340	60	323	90	694	98	111	577	349	329	387		120	368	65	255	411	2	0	281	175	35	124	259	495	741	25		23	221	6	89	311	46	0	26	0	82	0	0	49	382	295		0
	727	34	85	778	98	72	218	69	265	101	148	967	615	319	584		31	291	36	309	259	25	0	396	240	39	311	208	536	639	50		2	400	40	2	342	50	0	36	0	89	0	0	293	277	378		0
	1015	66	158	656	382	78	249	56	355	180	369	878	760	220	550		117	223	37	370	63	108	0	327	212	76	186	231	431	685	52		12	332	50	35	273	39	0	58	0	53	0	0	316	340	308		0
	906	65	123	630	350	151	218	114	544	161	286	602	824	77	433		247	372	6	535	67	156	31	442	170	88	155	280	176	508	81		6	628	16	20	379	45	0	92	0	114	0	0	327	233	376		0
	628	80	89	586	199	138	244	70	351	142	239	700	571	27	389		315	317	48	432	105	93	74	433	125	68	33	224	371	531	92		6	718	11	6	338	53	0	37	0	5	0	0	297	272	336		0
	638	82	110	555	68	138	206	7	438	159	276	564	873	6	368		429	199	1	389	84	172	33	457	160	58	24	240	364	467	95		0	461	22	9	369	60	0	72	0	92	0	0	389	137	366		0
	588	171	72	397	168	200	222	20	313	275	453	746	914	38	704		391	40	62	384	16	162	25	328	111	59	43	93	159	425	125		11	575	4	15	361	117	0	19	0	14	0	0	500	158	344		0
	800	231	107	322	172	203	246	39	223	173	148	780	415	240	801		352	19	71	282	137	113	28	225	249	25	88	202	201	318	78		0	400	0	79	385	88	0	71	0	0	1	0	313	168	379		0
	1020	149	123	191	338	226	222	16	231	80	105	581	873	305	512		379	35	73	231	106	143	65	301	295	69	493	127	269	263	110		6	323	8	59	331	45	0	46	0	56	0	0	243	235	275		0
	976	143	124	156	135	145	102	35	200	39	153	177	337	405	516		395	58	32	220	134	228	39	294	348	158	746	125	229	235	112		35	207	59	77	237	24	0	68	0	36	0	0	178	249	233		2
	934	164	157	14	59	121	96	100	411	126	144	763	504	365	112		427	118	24	188	213	191	6	302	111	99	872	86	413	257	104		5	124	61	32	373	33	0	37	0	89	0	0	84	132	471		0
	904	82	155	66	100	120	99	21	350	94	86	1088	469	249	107		285	93	4	191	230	112	26	291	60	87	947	44	703	206	201		8	183	35	51	254	41	0	113	0	27	0	0	129	81	454		1
	1047	137	115	69	279	105	118	7	578	11	205	1041	422	149	95		219	54	14	201	195	113	29	253	59	121	717	42	815	130	145		1	122	16	79	59	37	0	83	0	27	0	0	208	140	291		0
	1060	147	163	87	278	101	89	0	597	22	321	1134	255	93	74		107	12	12	220	270	99	19	379	146	183	632	27	510	146	99		5	360	0	42	200	13	0	58	0	65	0	0	345	72	243		0
	1458	168	143	121	302	146	161	1	571	2	177	1155	284	54	102		222	13	19	65	283	95	49	271	132	230	541	67	254	102	40		68	616	5	41	61	15	0	56	0	30	0	0	129	114	250		0
	1425	183	127	101	90	158	62	0	368	1	161	1152	277	25	38		274	9	5	51	194	148	50	225	46	183	499	74	246	63	43		92	631	11	4	74	10	0	8	0	42	0	0	149	68	167		1
	1232	101	59	371	196	192	19	6	218	37	156	908	847	42	75		318	100	7	135	126	102	40	179	71	175	599	81	164	37	66		71	512	0	3	171	14	0	26	0	0	0	0	130	151	156		0
	1313	8	152	685	210	129	0	0	305	19	228	657	2005	34	268		262	72	13	161	37	35	40	178	177	201	283	64	172	173	83		94	502	0	0	112	17	0	32	0	19	0	0	88	207	226		0
	1295	61	244	867	53	123	2	2	282	21	179	391	2232	22	458		264	11	26	238	187	95	29	108	74	212	227	39	465	268	113		72	494	0	4	39	15	0	11	0	0	0	0	67	240	238		0
	1258	16	282	944	156	82	1	2	313	22	189	392	2103	0	578		381	166	5	269	302	95	82	262	227	158	269	50	392	561	57		57	482	1	3	107	23	0	44	0	1	0	0	247	289	224		0
	1007	94	204	1135	240	94	46	9	564	2	295	413	1853	16	516		292	283	13	231	312	12	30	284	165	153	208	75	321	842	121		29	364	0	0	73	93	0	2	0	0	0	0	283	237	157		0
	960	125	204	831	273	68	150	34	952	4	103	175	2041	13	535		108	366	60	148	99	48	35	318	155	111	264	96	363	942	229		37	522	3	0	21	79	0	19	0	6	0	0	198	148	139		0
	1159	46	265	811	523	93	68	24	993	9	135	423	1127	48	425		90	383	50	99	279	58	60	322	153	112	297	83	555	915	253		39	705	0	0	119	13	0	4	0	0	0	0	61	114	127		0
	1066	50	354	848	504	62	37	42	1000	28	285	107	1056	26	461		273	330	49	84	234	29	28	454	228	163	298	125	190	675	277		59	551	0	0	119	39	0	65	0	0	0	0	45	255	153		0
	492	46	293	674	548	90	11	39	1030	50	242	628	1201	296	497		114	320	2	118	165	5	25	466	312	191	205	143	211	325	267		50	727	0	0	35	26	0	73	0	1	0	0	13	260	120		0
	271	50	189	405	414	87	17	2	886	21	320	341	924	398	154		149	241	11	96	76	19	2	611	252	134	287	164	132	264	191		10	570	8	5	9	15	0	74	0	6	0	0	1	201	52		0
	244	105	110	351	460	108	4	2	953	13	545	589	585	292	88		162	78	12	115	75	85	15	534	206	136	297	150	161	268	190		59	776	0	0	165	30	0	76	0	8	0	0	9	185	171		0
	69	159	43	280	783	98	6	10	898	20	295	568	709	316	96		175	163	10	40	114	85	53	637	132	110	252	149	194	212	144		92	620	7	0	258	50	0	29	0	131	0	0	3	239	274		0
	141	101	191	293	879	126	3	0	1130	18	309	269	1042	348	292		87	160	58	70	116	48	26	625	202	217	232	179	474	204	96		73	586	4	0	288	20	0	93	0	58	0	0	3	276	30		0
	249	64	250	227	591	106	1	0	852	14	300	148	820	415	699		133	98	71	92	90	19	38	529	54	165	274	257	446	130	22		15	529	0	0	321	4	0	19	0	89	0	0	3	331	180		0
	198	27	456	225	534	119	106	10	927	7	178	314	655	651	663		225	126	18	147	62	2	20	330	11	205	347	164	495	107	15		1	467	3	0	312	1	0	77	0	99	0	0	0	257	222		0
	670	21	363	236	729	105	195	0	1016	4	254	615	709	999	742		254	125	15	66	59	20	8	254	52	174	404	141	707	88	18		84	344	9	0	283	1	0	32	0	9	0	0	0	215	172		0
	656	50	277	201	669	112	122	1	948	35	271	819	613	976	840		160	57	39	144	83	61	6	262	13	84	372	173	531	123	45		130	332	2	0	325	0	0	63	0	52	0	0	1	179	186		0
	593	49	262	47	636	97	98	9	923	112	162	953	713	1046	923		193	169	105	129	115	6	1	119	14	145	383	243	244	57	53		54	311	0	0	341	6	0	39	0	0	0	0	0	237	113		0
	378	59	267	66	758	65	64	1	936	59	71	901	618	1152	852		295	150	48	96	100	114	4	117	0	91	225	121	352	92	49		42	389	0	0	305	17	0	84	0	17	0	0	0	173	99		0
	276	220	54	112	788	84	39	1	958	33	217	865	684	1157	836		278	137	17	34	91	190	0	180	0	23	226	103	395	61	19		20	341	0	0	240	10	0	81	0	5	0	0	0	164	224		0
	444	226	77	139	733	86	26	1	1019	42	273	553	274	922	669		96	142	9	55	123	119	10	213	0	32	269	139	343	147	3		18	287	0	0	250	5	0	2	0	47	0	0	1	135	264		0
	461	159	97	70	418	55	0	47	814	53	190	705	530	965	572		61	128	15	150	80	204	18	271	78	26	323	68	284	302	6		13	34	7	4	296	31	0	101	0	119	0	0	3	142	288		0
	1035	35	220	109	575	78	1	3	726	30	145	499	489	981	479		70	142	73	196	60	194	29	487	157	84	216	51	109	310	65		11	65	0	1	222	20	0	45	0	28	0	0	159	159	351		0
	1284	30	157	107	256	46	27	5	931	47	191	553	199	1011	448		69	121	27	61	190	209	8	323	170	113	100	142	147	406	60		49	31	3	0	264	28	0	108	0	116	0	0	466	179	351		0
	1538	59	78	179	690	57	10	12	873	34	306	608	595	809	337		132	65	35	174	282	205	13	59	78	120	258	12	309	454	27		26	111	0	0	336	31	0	69	0	19	0	0	578	204	384		1
	1786	51	85	298	657	26	32	35	638	30	140	550	510	770	212		104	44	1	148	203	287	8	224	188	119	285	38	215	544	3		4	283	3	0	364	56	0	4	0	93	0	0	424	155	350		0
	1747	7	14	312	487	27	24	11	631	46	93	510	516	502	96		145	46	32	114	107	249	12	292	211	113	197	90	219	579	77		10	294	0	2	382	40	0	124	0	140	0	0	379	148	397		0
	1452	98	36	226	399	55	1	94	675	5	235	577	781	771	126		130	34	8	69	9	167	32	293	89	138	143	117	103	542	20		34	373	1	4	285	37	0	68	0	169	0	0	399	83	355		1
	1235	39	95	165	532	59	31	1	518	11	154	616	553	658	178		323	67	1	82	56	137	1	253	71	146	117	2	405	380	15		17	561	26	27	237	20	0	95	0	155	0	0	435	56	134		0
	1151	122	195	301	399	76	18	0	525	16	249	558	273	271	157		417	128	43	171	108	4	2	267	83	139	224	92	204	63	45		31	819	23	15	259	69	0	23	0	69	0	0	507	83	176		0
	1210	90	180	211	418	123	6	6	580	1	394	706	118	220	185		259	73	21	173	47	58	4	181	211	217	340	63	301	165	12		26	711	20	60	319	52	0	31	0	83	0	0	574	138	403		0
	1151	40	89	28	710	64	4	1	767	4	122	706	257	391	159		199	136	4	261	25	277	4	189	130	325	252	11	343	181	6		75	129	5	15	299	11	0	108	0	96	0	0	384	152	274		0
	750	8	51	37	628	121	8	7	815	4	424	671	302	643	241		192	55	72	99	47	49	22	325	72	372	363	60	346	112	54		26	50	12	16	288	52	0	26	0	24	0	0	307	115	276		0
	554	18	45	20	445	78	3	20	801	6	294	536	98	623	328		248	46	33	47	126	90	5	328	38	332	307	4	451	219	2		6	248	8	97	342	7	0	116	0	150	0	0	238	87	500		0
	404	55	64	17	489	35	0	0	804	2	170	391	171	309	411		239	45	126	49	108	76	9	259	65	323	334	38	252	253	3		2	237	19	106	360	16	0	58	0	171	0	0	120	42	617		0
	495	38	134	9	529	8	2	78	637	63	113	523	42	399	447		242	100	31	83	98	60	3	246	76	384	488	32	387	241	1		61	198	16	32	312	18	0	9	0	148	0	0	318	55	536		0
	519	36	38	60	461	4	0	12	393	11	76	691	200	335	477		250	156	1	211	142	157	3	349	55	532	645	42	93	308	21		89	179	7	16	386	0	0	47	0	207	0	0	241	133	439		0
	399	25	68	40	375	7	0	5	285	5	140	570	234	393	495		321	152	9	101	83	178	3	493	54	409	469	120	326	170	138		103	214	28	39	276	26	0	14	0	192	0	0	228	60	243		0
	335	47	41	3	244	18	72	5	353	10	241	661	253	527	158		257	76	1	101	58	196	0	435	26	358	575	9	251	269	170		118	46	24	165	276	16	0	12	0	185	0	0	242	17	130		0
	308	52	10	85	120	66	27	39	303	109	104	584	243	505	369		200	153	0	102	111	92	6	209	49	457	582	12	407	221	69		123	44	30	119	263	57	0	126	0	176	0	0	199	29	30		0
	421	49	28	106	206	5	6	34	451	79	129	607	70	347	282		116	166	13	54	130	80	0	117	15	543	665	32	267	183	22		55	2	38	69	305	60	0	98	0	172	0	0	37	7	191		1
	711	23	172	142	425	17	33	46	401	92	46	593	76	986	214		316	128	8	8	48	99	2	30	28	519	798	3	249	194	60		34	15	20	0	449	36	0	78	0	137	0	0	115	15	144		1
	663	19	112	42	285	57	7	15	140	92	316	554	261	1655	60		258	139	0	39	100	185	18	45	54	424	685	18	264	329	50		85	1	40	35	362	70	0	126	0	164	0	0	158	52	126		0
	612	6	72	54	167	71	4	3	330	71	478	626	107	1675	113		247	130	3	14	1	205	29	63	139	386	424	41	182	278	41		101	41	69	1	514	51	0	68	0	75	0	0	164	19	309		0
	748	28	42	126	249	23	3	1	353	54	449	651	180	1430	63		108	57	17	30	75	158	2	115	285	279	448	15	394	249	61		96	37	72	27	447	47	0	52	0	149	0	0	111	79	486		0
	714	28	29	167	327	2	0	14	216	1	476	786	69	1455	87		116	79	8	72	60	80	2	64	170	297	295	21	402	306	15		75	1	73	64	563	32	0	169	0	111	0	0	104	161	525		0
	588	19	12	145	563	1	14	28	179	1	271	1037	48	972	157		266	65	0	16	11	252	11	196	291	340	287	31	413	266	41		49	14	50	27	681	37	0	100	0	76	0	0	225	84	546		0
	456	25	91	247	555	0	144	6	147	2	278	914	119	682	185		512	79	17	56	32	216	3	383	81	356	424	0	777	340	76		20	8	7	15	890	39	0	128	0	29	0	0	299	97	199		0
	415	15	243	241	552	10	179	0	285	32	157	686	142	441	276		468	89	7	19	79	269	0	347	62	349	536	8	728	532	53		15	54	11	12	881	34	0	62	0	53	0	0	360	163	330		0
	420	19	331	194	588	9	147	19	181	1	116	703	296	477	244		536	91	11	25	172	329	2	192	14	308	574	3	408	367	6		7	7	12	30	585	26	0	12	0	82	0	0	600	171	247		1
	491	4	442	169	438	6	119	20	350	12	96	217	265	577	438		375	32	4	77	204	273	4	207	88	312	474	0	875	94	18		1	1	36	17	677	24	0	77	0	54	0	0	383	200	259		0
	491	9	338	64	270	6	100	11	534	20	35	502	271	458	550		287	93	0	20	242	304	9	575	41	413	361	17	643	164	61		1	5	106	1	517	20	0	28	0	30	0	0	261	217	244		0
	836	51	378	101	206	5	114	13	516	12	209	616	65	572	618		227	3	8	2	192	282	23	537	33	68	398	4	859	256	140		0	15	129	11	455	17	0	105	0	83	0	0	253	290	140		0
	941	19	416	375	190	7	99	5	322	63	122	376	116	621	639		287	89	1	10	154	324	3	273	8	80	556	9	905	426	53		1	35	50	22	538	1	0	41	0	107	0	0	221	350	165		0
	1005	23	479	473	108	5	52	0	151	32	84	603	299	498	725		131	62	3	46	32	278	2	234	58	48	680	17	855	482	115		0	3	45	5	395	68	0	11	0	44	0	0	403	234	181		0
	899	0	410	479	155	6	99	115	139	1	16	987	161	760	613		176	48	0	82	104	280	9	144	19	93	689	11	799	502	152		0	2	70	4	376	66	0	130	0	126	0	0	267	354	201		0
	729	13	475	496	283	15	178	2	352	5	174	1331	356	709	663		263	75	9	61	192	209	26	140	12	193	545	69	622	489	176		0	45	54	0	372	78	0	149	0	99	0	0	168	452	220		0
	806	26	485	395	295	0	233	0	303	0	133	1137	808	297	782		319	45	10	62	17	114	34	291	81	270	543	20	635	400	182		0	4	13	0	313	61	0	16	0	41	0	0	119	404	236		0
	862	0	391	405	325	0	194	12	229	0	32	801	1059	282	566		304	16	0	108	257	84	20	453	29	465	472	13	723	437	181		0	14	13	0	278	68	0	140	0	21	0	0	244	213	279		0
	1005	49	214	352	341	0	327	0	311	0	50	428	1109	209	621		352	12	22	153	318	111	17	540	115	494	410	14	671	397	114		0	48	0	0	375	86	0	63	0	82	0	0	210	288	314		0
	914	25	402	428	289	6	413	7	252	0	98	361	1220	369	545		392	17	11	87	254	479	6	662	138	459	513	39	753	284	96		0	2	3	1	375	69	0	11	0	82	0	0	306	282	279		0
	797	1	271	447	201	3	317	0	128	0	68	325	1055	396	606		387	10	2	121	233	457	20	694	42	580	403	28	1216	155	67		0	30	0	19	283	31	0	19	0	31	0	0	339	366	340		1
	874	21	457	480	180	0	250	103	79	0	268	604	659	299	674		244	29	23	155	286	463	25	459	65	628	485	48	1312	337	63		0	5	45	15	339	20	0	5	0	17	0	0	162	356	313		3
	718	79	524	553	237	0	169	251	45	0	538	609	343	477	662		264	35	23	179	270	339	2	351	117	649	504	18	1263	257	40		0	4	28	25	364	23	0	22	0	51	0	0	65	250	200		0
	637	212	450	437	183	2	156	256	3	91	531	472	496	570	655		192	23	28	166	181	287	11	364	103	480	732	2	497	347	33		0	10	6	52	392	45	0	22	0	6	0	0	165	255	45		0
	482	317	286	351	139	0	196	251	16	103	653	408	364	705	549		283	20	43	220	106	381	41	502	101	358	706	5	710	321	70		0	4	0	11	404	69	0	11	0	20	0	0	13	182	73		0
	544	283	310	444	171	0	180	133	95	29	795	477	558	598	525		178	53	28	265	136	271	15	572	37	429	725	14	660	265	20		3	58	13	34	183	65	0	59	0	32	0	0	140	205	190		0
	620	145	395	541	93	1	127	137	143	22	844	446	518	592	361		262	62	17	267	69	211	46	552	45	378	730	15	384	243	7		58	139	12	110	257	78	0	124	0	68	0	0	228	169	124		0
	533	171	359	609	67	1	69	171	260	23	831	465	653	552	196		291	33	10	264	46	168	21	541	17	308	718	1	558	320	13		12	117	46	213	317	37	0	6	0	61	0	0	89	214	112		0
	342	160	362	477	111	0	64	335	353	3	685	372	694	571	108		304	25	9	109	14	297	0	731	10	392	400	21	193	265	44		107	109	31	133	172	50	0	96	0	28	0	0	109	280	30		0
	225	137	311	284	77	3	72	279	407	1	559	273	436	567	168		272	30	0	105	45	139	8	617	1	357	229	9	323	309	48		44	204	4	40	185	91	0	95	0	5	0	0	9	401	104		0
	250	139	269	221	45	0	83	222	370	12	455	96	322	575	148		333	71	0	177	65	53	18	740	0	239	98	5	157	191	120		84	230	0	5	246	85	0	26	0	27	0	0	25	349	22		0
	208	213	434	373	48	0	13	281	232	71	450	300	584	519	203		401	112	9	174	67	24	0	834	0	204	165	5	207	89	171		104	124	11	1	338	14	0	10	0	26	0	0	44	376	27		0
	261	252	468	500	59	1	20	152	311	37	510	732	513	330	107		374	93	5	188	21	57	0	674	0	135	217	20	423	55	117		98	32	5	48	190	21	0	55	4	3	0	0	238	298	189		0
	446	268	416	488	42	0	3	113	292	69	410	574	285	259	233		413	141	8	252	57	22	50	857	0	169	80	3	155	65	152		49	46	4	103	163	42	0	24	9	3	0	0	234	220	351		0
	587	386	400	306	36	0	0	81	689	36	205	191	260	319	284		522	175	43	124	48	15	17	852	0	188	80	30	317	139	141		46	414	0	184	342	21	0	10	76	2	0	0	274	170	317		0
	621	360	311	171	53	0	0	128	752	16	124	607	196	275	309		598	173	4	79	94	31	40	645	0	194	49	10	341	174	233		38	355	0	170	190	55	0	137	145	14	0	0	390	197	172		0
	536	539	515	248	10	0	0	97	850	15	212	367	222	400	382		435	128	6	57	128	32	2	560	0	217	8	15	152	100	163		11	113	21	61	112	83	0	121	75	1	0	0	207	247	193		0
	457	624	328	367	62	0	31	63	871	32	137	293	133	386	609		379	161	8	64	159	76	28	640	0	223	84	51	303	61	147		7	604	22	109	115	49	0	44	95	58	0	0	434	162	300		0
	424	751	400	467	42	1	48	106	958	17	209	335	175	457	526		231	163	18	180	143	76	33	292	41	184	154	5	281	91	152		3	781	5	129	263	29	0	123	101	7	0	0	328	122	339		0
	319	851	280	460	30	3	19	77	1171	108	172	570	157	373	293		643	154	12	254	141	67	14	575	131	289	204	13	303	109	126		26	613	1	122	280	26	0	109	1	32	0	0	418	133	202		0
	260	715	106	392	74	0	23	63	751	40	125	367	267	377	273		838	130	14	295	162	91	25	731	147	265	176	3	427	38	141		12	107	12	97	46	39	0	5	37	0	0	0	463	177	108		0
	183	525	234	215	114	4	126	96	697	22	63	440	123	350	343		463	112	19	264	139	76	4	714	117	132	156	8	737	57	61		97	353	0	151	152	97	0	24	57	0	0	0	464	229	48		0
	261	134	431	253	53	8	154	75	437	20	197	412	139	290	157		249	117	3	242	109	71	0	552	147	166	293	5	1096	35	74		104	153	0	57	267	100	0	4	43	0	0	0	516	243	1		0
	302	94	310	191	58	9	52	91	89	11	259	157	126	288	179		279	115	13	212	147	121	11	765	166	67	329	13	1086	30	120		81	737	4	109	225	103	0	7	116	1	0	0	509	228	0		0
	160	251	108	166	35	0	147	192	258	31	269	46	169	318	213		256	131	30	90	29	93	5	387	116	71	341	45	865	72	52		62	771	1	41	231	103	0	37	72	1	0	0	478	306	0		1
	185	321	189	159	4	2	70	232	215	2	376	106	253	284	259		366	153	6	135	89	10	1	374	249	150	354	1	911	106	60		32	797	53	53	165	59	0	126	45	0	0	0	393	280	0		0
	410	310	290	34	80	9	65	419	186	4	460	102	413	287	222		452	164	3	132	37	20	3	252	349	37	357	40	979	124	108		22	286	104	109	330	75	0	71	91	0	0	0	296	217	0		0
	519	500	284	17	89	26	29	467	242	4	678	270	440	231	36		454	210	0	110	79	86	16	417	306	163	392	20	941	17	41		12	571	166	190	245	27	0	94	36	0	0	0	417	211	0		0
	630	626	239	52	118	35	22	384	170	6	586	152	421	185	128		411	112	43	149	22	145	23	603	313	71	376	2	911	154	53		3	369	136	136	195	46	0	38	8	5	0	0	510	119	0		0
	709	661	353	128	41	10	72	524	196	52	644	112	400	183	253		398	246	73	153	107	204	9	600	166	150	381	38	801	160	50		8	585	149	69	169	39	0	4	63	18	0	0	545	140	0		0
	838	584	470	75	11	0	19	495	224	47	578	127	281	165	163		256	198	60	152	122	72	13	442	261	140	344	48	1075	186	135		20	691	141	61	387	52	0	2	48	58	0	0	605	180	0		0
	983	787	508	19	1	13	61	559	206	49	483	250	147	134	629		476	160	43	211	101	112	2	503	318	82	263	30	1157	98	179		5	567	91	99	543	23	0	38	14	62	0	0	657	146	2		0
	875	909	569	62	16	39	103	414	307	6	528	77	118	121	1051		217	143	1	337	27	24	1	718	271	24	140	80	1071	50	111		0	645	129	198	563	12	0	5	0	38	0	0	681	158	0		0
	1015	989	460	66	97	57	39	282	357	74	396	297	201	181	1022		373	43	8	299	1	168	14	891	220	109	131	10	1254	31	116		2	310	190	62	407	26	0	2	0	5	0	0	524	129	0		0
	892	1097	409	95	112	25	63	242	222	32	347	200	453	136	1039		178	94	2	337	76	49	2	571	47	124	216	13	1440	52	171		12	479	168	24	567	8	0	101	4	41	0	0	684	84	0		0
	503	1014	268	40	76	12	48	333	43	42	307	178	481	147	953		232	194	20	326	92	72	23	616	133	78	315	45	1144	28	144		2	345	133	83	597	9	0	155	0	16	0	0	453	87	0		0
	277	903	240	113	65	11	7	459	135	39	402	461	516	78	815		65	130	33	273	17	107	5	618	61	115	230	56	937	40	94		11	477	91	66	404	8	0	19	1	49	0	0	651	69	0		1
	191	1038	180	42	167	52	15	698	84	28	550	198	666	62	548		41	119	1	469	96	173	12	542	171	70	149	70	771	39	167		7	398	74	65	361	0	0	27	7	1	0	0	777	52	0		0
	384	1042	78	33	218	80	18	568	82	44	676	473	618	71	462		168	94	35	392	70	66	6	708	191	78	45	40	555	69	82		1	207	58	53	576	5	0	88	4	4	0	0	737	60	0		0
	515	921	328	128	353	57	98	501	5	75	777	303	994	78	333		235	70	21	255	41	28	13	568	214	17	24	52	744	15	122		4	269	83	24	646	0	0	79	1	80	0	0	768	66	0		0
	554	831	279	315	297	45	118	507	95	45	727	71	1249	103	166		232	242	11	135	235	26	62	514	99	50	60	33	629	75	70		3	49	109	152	750	4	0	5	0	111	0	0	947	94	0		0
	812	683	140	310	172	94	78	622	58	123	662	213	1067	75	115		366	305	2	148	171	38	72	531	402	135	5	91	704	84	3		0	363	84	236	723	18	0	13	0	114	0	0	1010	34	0		0
	1071	641	139	171	191	92	17	567	6	163	582	237	1423	49	161		297	212	22	169	64	11	41	619	339	120	18	152	389	21	1		28	443	81	156	530	10	0	31	0	78	0	0	999	55	0		2
	1172	477	319	98	225	76	0	687	9	170	509	306	1232	8	75		287	150	46	139	95	35	68	769	290	103	0	132	95	115	19		77	190	43	230	471	12	0	5	0	34	0	0	1213	69	0		0
	1145	445	361	116	225	98	58	756	23	123	616	108	1058	54	68		209	170	60	188	85	122	154	787	441	185	49	95	302	145	1		81	414	48	291	509	1	0	32	0	57	0	0	1330	70	0		0
	1151	463	355	37	201	116	5	951	34	30	709	309	866	65	290		262	163	47	158	137	75	222	692	306	97	70	152	641	19	36		36	395	55	280	553	3	0	53	0	45	1	0	1260	52	0		0
	1220	840	153	64	215	66	9	773	0	2	666	349	955	33	130		293	108	43	113	100	3	155	411	233	141	140	142	406	92	88		75	263	2	113	370	4	0	16	73	5	0	0	1254	29	323		0
	1012	718	210	63	171	105	3	805	10	0	736	246	1076	16	57		270	107	32	101	64	54	132	423	70	189	103	137	296	71	100		111	246	4	134	351	9	0	52	208	18	5	0	1728	35	753		1
	1158	329	532	23	246	122	8	823	78	1	1016	417	640	118	71		215	67	89	102	92	100	128	291	84	109	116	229	225	69	79		63	140	26	123	262	30	8	34	223	11	144	0	1737	32	470		5
	854	482	676	58	306	138	0	1115	118	20	1288	491	703	123	30		160	38	155	76	191	130	79	299	40	221	128	233	273	38	49		26	384	28	136	182	18	13	59	98	4	203	0	1355	36	464		0
	851	252	791	24	452	53	7	1327	321	35	1307	718	614	250	106		150	13	95	58	77	82	52	298	4	222	199	163	341	2	63		1	136	109	89	265	30	3	69	18	7	252	0	1341	18	447		0
	845	336	465	41	359	24	1	1221	318	23	1557	879	542	320	146		47	28	216	79	134	12	36	431	3	172	213	140	1505	22	134		7	388	119	207	65	17	0	81	14	0	193	0	1221	15	640		1
	854	207	595	167	142	1	0	928	206	54	1456	936	313	263	110		123	272	195	106	107	4	12	478	44	116	227	100	2132	102	211		11	513	130	52	171	9	4	51	55	0	23	0	1138	34	415		0
	819	52	730	174	67	29	0	1308	235	63	1324	867	395	233	31		211	449	97	83	77	70	37	311	31	163	75	149	2300	194	213		17	366	157	196	201	51	0	39	37	1	53	0	1179	39	259		0
	741	91	558	266	68	21	0	832	209	157	1331	745	538	170	24		137	554	121	47	53	148	42	310	16	159	61	91	2383	180	149		4	201	65	92	347	31	5	57	1	25	61	0	1023	26	364		0
	833	149	441	346	54	23	0	877	225	197	1624	405	298	156	95		37	508	1	24	163	119	76	286	8	116	140	73	1957	182	162		0	259	138	20	257	57	0	114	10	31	174	0	1173	8	457		0
	1156	254	287	275	83	7	59	875	223	281	1700	417	527	160	90		124	529	28	58	200	34	10	210	3	254	119	74	1525	69	171		0	216	121	73	242	32	0	126	0	42	156	0	1115	1	538		0
	1298	94	170	231	28	6	97	971	251	338	1479	503	735	442	142		81	417	12	12	154	1	61	177	0	98	176	37	1029	51	185		4	229	103	309	69	26	0	91	6	0	217	0	1159	2	477		30
	1193	11	249	166	38	7	116	902	163	348	1660	439	771	568	143		61	526	10	35	34	13	17	261	0	166	151	69	935	139	55		11	255	123	179	117	38	0	33	3	18	125	1	950	37	380		2
	306	77	545	200	23	0	77	772	84	417	1438	406	821	604	57		90	328	8	10	77	3	51	54	0	69	217	58	510	173	44		2	332	62	33	167	22	0	8	1	0	88	0	797	30	193		1
	475	111	349	127	32	3	14	543	91	430	960	322	843	512	25		27	190	10	31	171	31	107	26	0	131	203	7	105	136	49		1	125	35	56	32	36	0	5	0	0	25	0	584	3	225		0
	169	502	306	116	0	11	3	331	67	305	973	256	777	288	92		82	170	25	56	124	11	72	19	0	140	118	4	385	46	26		0	357	77	83	133	25	0	2	0	0	32	0	361	0	156		1
	105	887	122	134	5	0	3	296	92	289	1206	290	507	120	19		35	194	146	21	120	11	11	4	2	146	101	4	463	71	0		0	185	29	60	80	10	0	8	0	0	83	0	710	19	21		7
	121	332	38	42	16	3	0	628	94	313	1756	357	484	274	1		21	143	108	9	58	0	0	20	0	146	187	4	400	44	0		1	113	68	12	3	11	0	5	0	0	37	0	407	15	42		14
	115	128	67	9	13	0	0	527	84	296	1877	573	403	266	0		111	181	26	1	67	2	0	1	5	225	217	1	94	67	0		6	88	94	7	8	8	0	10	0	0	73	0	1132	2	6		8
	166	240	185	2	14	8	0	654	11	295	1656	559	236	98	1		241	197	89	1	49	0	4	38	0	170	225	0	38	3	0		0	351	164	2	76	0	0	18	0	0	10	0	1110	0	0		3
	4	317	112	0	4	6	0	873	1	348	1192	195	216	251	0		197	141	48	1	39	0	1	1	0	61	219	0	9	54	0		0	243	240	2	45	0	0	9	0	0	0	0	1171	4	29		0
	20	348	133	0	23	28	0	1103	64	347	1127	286	144	370	0		191	111	99	2	1	1	0	17	0	249	179	0	162	109	0		0	58	91	1	207	0	0	12	0	0	0	0	1214	4	1		1
	12	418	20	0	14	47	0	1055	7	357	841	176	152	446	0		193	34	140	14	41	0	0	48	1	233	171	0	2	5	0		0	118	25	0	32	0	0	41	0	0	0	0	1097	30	9		0
	3	377	68	0	1	44	4	1115	42	306	1182	436	433	541	0		231	35	3	45	117	0	0	8	0	224	208	0	0	55	4		0	61	2	0	215	0	0	76	0	0	0	0	834	48	33		0
	209	178	100	0	57	73	7	625	27	241	1754	440	449	518	0		300	13	7	89	159	7	0	37	0	128	218	0	7	31	0		0	120	111	1	111	0	0	67	0	0	0	0	866	17	0		0
	675	161	70	0	70	106	0	755	368	267	1608	407	589	612	4		232	56	0	192	98	0	0	495	0	217	128	0	28	68	0		0	160	95	0	8	0	0	86	0	0	0	0	972	10	4		0
	865	76	12	0	62	181	0	949	373	232	1182	402	755	662	109		43	64	8	151	71	0	0	467	0	203	108	0	3	50	0		0	134	125	0	7	0	0	77	0	0	0	0	1031	4	0		7
	879	282	2	0	16	271	2	969	301	146	1139	68	720	543	206		93	31	1	104	83	0	0	269	0	319	63	0	7	92	0		0	1	151	1	5	0	0	85	0	0	0	0	1030	34	29		10
	703	881	79	23	29	233	0	740	362	168	796	214	948	582	169		55	32	3	97	24	0	4	307	0	340	31	0	18	25	1		0	17	39	16	13	0	0	39	0	0	0	0	1111	20	20		1
	615	1625	174	185	22	248	0	776	393	123	979	92	790	360	200		44	13	1	154	39	1	3	226	0	226	3	0	3	79	4		0	223	52	61	50	1	0	6	1	0	1	0	1271	18	10		1
	1024	1710	198	100	41	150	0	841	384	200	862	266	650	424	339		92	35	19	171	32	139	0	228	0	182	3	0	2	54	9		0	107	10	225	128	0	0	10	0	0	4	0	1362	26	11		42
	1104	1545	149	187	49	103	3	739	296	185	832	12	523	415	215		96	5	73	165	50	180	0	164	0	94	4	0	19	143	46		1	14	193	96	177	0	0	16	0	0	21	0	1304	32	0		50
	1635	1504	119	172	82	107	0	426	194	132	496	317	524	347	161		98	26	19	145	61	126	3	513	4	142	1	0	0	13	155		0	59	12	21	197	0	0	0	0	0	49	0	1082	64	20		1
	1823	1417	248	84	47	138	2	863	330	148	762	360	337	388	73		97	21	0	136	59	171	0	323	0	138	0	0	0	125	183		0	161	0	91	222	0	0	0	0	0	167	0	1007	70	6		3
	1800	1097	411	133	7	151	8	886	543	66	928	246	353	400	40		4	2	8	151	52	234	2	163	0	80	0	0	0	38	87		0	10	0	46	29	0	0	0	0	0	250	0	986	57	0		15
	1687	923	439	214	57	135	0	353	642	161	1249	289	507	353	207		76	25	14	77	30	208	0	424	0	163	0	0	1	77	28		0	212	36	29	98	0	0	0	0	0	200	0	884	23	4		0
	1188	604	573	191	55	124	6	632	651	147	1243	411	941	274	207		64	26	3	72	53	124	0	213	0	156	4	0	133	38	38		0	66	51	48	47	0	0	0	0	0	111	0	825	4	0		2
	1501	792	519	103	345	107	0	795	734	179	1789	381	1024	329	182		8	35	3	39	52	94	0	229	0	236	1	6	491	75	53		0	179	12	89	374	0	0	1	0	0	97	0	342	82	27		5
	1344	500	516	246	656	81	2	924	889	213	2381	207	789	246	162		3	59	11	24	33	18	0	119	0	184	0	10	616	122	31		0	158	70	55	361	0	0	0	0	0	14	0	456	110	2		1
	1256	404	617	182	915	39	0	508	833	318	1996	191	519	146	149		19	60	14	12	70	25	0	125	0	88	0	17	237	125	24		0	167	24	50	155	0	0	0	0	0	1	0	589	70	5		1
	663	399	673	342	929	36	7	719	624	230	1958	210	228	259	151		30	31	105	126	74	5	0	92	0	85	2	79	357	102	1		0	33	168	44	302	0	0	0	0	0	24	0	360	70	0		1
	795	36	828	329	946	43	3	732	691	278	1517	164	443	280	191		25	48	161	115	40	2	0	136	0	159	24	99	348	169	4		2	2	136	70	177	0	0	9	0	0	5	0	406	20	31		3
	922	47	806	338	633	57	8	936	772	166	1014	516	615	221	183		1	27	41	31	0	22	0	39	0	132	262	84	449	63	5		0	21	24	24	107	0	0	36	0	0	12	2	382	52	19		17
	540	252	850	317	470	46	3	624	676	67	870	485	1183	291	12		1	8	49	44	2	20	0	123	2	202	323	41	504	24	0		0	0	59	13	54	0	0	64	0	0	0	1	577	96	49		14
	537	178	965	226	350	51	0	712	734	46	816	333	1622	166	99		0	56	68	13	67	3	0	254	0	200	197	38	63	134	3		0	1	27	6	48	1	0	105	0	0	12	0	579	43	0		0
	486	41	819	380	193	58	0	735	633	6	432	399	1503	146	97		31	39	5	29	41	1	0	330	0	192	21	44	50	21	11		0	21	109	4	205	0	0	63	0	0	1	0	504	78	23		6
	515	167	872	501	206	31	0	541	392	18	366	397	1312	212	154		29	35	2	37	33	0	0	277	0	210	121	22	59	59	0		0	101	152	6	90	0	0	49	0	0	0	0	506	83	0		5
	459	228	708	663	242	36	0	328	525	21	597	194	982	211	174		18	39	0	25	35	0	0	243	0	186	159	31	112	22	0		0	0	220	0	133	0	0	0	0	0	0	0	318	79	0		0
	945	89	848	269	255	26	0	278	612	4	397	81	644	179	97		22	48	13	25	54	0	0	290	0	107	180	38	4	15	0		0	159	350	0	88	0	0	3	0	0	0	0	464	28	4		0
	1144	58	778	438	237	17	3	642	601	14	572	171	573	92	137		6	41	0	62	2	4	0	314	0	215	261	6	18	85	0		0	4	343	2	55	0	0	1	0	0	0	0	649	8	9		0
	1352	49	815	335	175	46	2	406	451	10	531	157	576	38	102		34	35	10	37	58	0	0	288	2	188	205	59	60	52	3		0	159	335	0	283	0	0	1	0	0	1	0	768	7	14		3
	1208	131	629	225	262	53	3	342	411	4	579	77	464	110	31		4	10	6	2	28	0	1	168	0	194	171	57	136	28	2		0	56	235	3	174	0	0	0	0	0	0	0	692	6	0		3
	926	320	727	419	211	18	0	447	352	10	672	76	264	198	269		22	9	1	47	19	6	0	97	0	183	200	3	287	64	15		0	172	303	0	175	0	0	1	0	0	0	0	793	28	0		0
	1041	334	706	466	230	42	6	478	331	10	505	39	274	209	101		2	0	3	0	1	0	0	68	0	241	159	16	240	59	84		0	43	247	0	214	0	0	15	0	0	0	0	795	12	6		0
	826	261	751	427	339	37	130	761	196	4	695	46	335	205	63		6	1	0	4	4	4	0	2	0	358	104	20	115	31	65		0	138	192	0	71	0	0	10	0	0	0	0	803	31	0		0
	729	117	750	575	416	12	177	797	425	3	674	83	399	182	150		4	0	1	1	18	0	0	2	1	271	122	1	154	2	96		0	97	179	0	72	13	0	0	0	0	0	0	809	18	8		0
	749	334	563	509	332	13	215	385	317	0	300	113	395	126	146		1	0	5	0	54	0	0	2	0	208	40	20	112	24	151		0	146	200	0	53	9	0	0	0	0	0	0	1000	4	21		0
	856	337	696	422	129	26	173	338	256	3	352	133	250	117	119		59	29	20	2	42	3	0	23	0	136	33	5	151	1	133		0	94	286	0	18	8	0	5	0	0	0	0	1020	12	0		3
	1206	281	427	428	96	40	78	542	204	3	200	78	199	198	119		0	41	4	3	23	0	2	28	0	121	91	7	14	45	82		0	7	224	0	76	22	0	1	0	0	0	0	994	21	16		0
	1219	338	395	377	121	38	114	460	277	15	71	14	554	335	114		79	33	21	63	23	2	0	12	0	103	140	7	23	35	62		0	43	168	0	201	62	0	28	0	0	5	0	900	16	2		0
	1060	447	956	415	134	37	183	13	330	107	118	24	765	357	106		20	17	0	130	6	0	1	9	0	147	282	0	142	21	66		0	63	138	0	38	54	0	124	0	0	3	0	1036	10	0		0
	806	571	1101	364	137	10	195	391	275	585	262	3	805	308	390		72	14	8	147	4	0	82	1	0	70	351	6	231	56	55		0	37	89	0	213	57	1	137	0	0	1	0	1166	22	2		0
	1111	753	1241	396	210	32	65	378	112	795	949	1	1055	341	351		0	4	0	144	46	0	63	0	0	100	364	0	194	10	107		0	4	122	0	167	87	0	109	0	0	0	0	1199	50	34		0
	804	555	1413	266	168	64	102	331	193	818	595	62	853	308	307		27	4	6	119	15	89	50	1	0	100	320	0	71	16	129		0	150	134	2	76	26	1	69	0	0	0	0	1269	26	4		0
	900	831	1427	199	306	49	257	125	193	655	529	194	991	298	267		11	0	24	104	29	91	62	15	0	110	300	0	281	141	284		0	0	172	0	15	35	0	68	0	0	0	0	1130	29	4		0
	550	779	1218	334	365	29	318	96	132	501	329	102	944	262	242		1	1	4	106	19	141	56	10	0	65	313	0	237	196	340		0	96	93	0	55	37	0	56	0	0	0	0	1136	16	71		0
	387	434	885	287	266	90	324	35	3	272	665	93	911	231	256		24	2	4	115	23	186	40	17	0	148	293	0	171	33	380		0	147	144	0	17	20	0	47	0	1	0	0	778	24	117		0
	285	558	672	117	288	87	276	15	31	260	759	178	676	211	129		69	14	5	57	0	243	115	10	0	165	348	0	1	94	300		1	0	125	0	53	3	0	82	0	0	0	0	880	39	290		0
	453	979	520	237	291	57	249	84	3	308	698	237	638	238	4		0	12	2	43	3	106	26	17	0	142	347	1	153	150	359		0	115	83	0	22	3	0	85	0	1	0	0	761	20	466		0
	281	814	639	275	241	37	223	6	0	156	441	183	524	210	41		56	19	2	89	22	150	2	252	0	149	373	0	34	315	421		0	91	44	0	39	10	0	30	0	0	0	0	220	18	330		0
	529	600	1222	239	180	30	263	105	0	147	660	190	700	237	4		4	39	3	40	1	121	19	483	0	79	385	5	105	330	396		0	1	51	0	5	49	0	35	0	0	0	0	322	31	190		0
	375	700	1313	106	170	14	303	14	2	140	515	240	1024	149	0		67	51	1	10	17	110	26	439	0	102	351	0	315	293	393		0	146	102	0	4	10	0	48	0	0	0	0	273	42	55		5
	382	551	873	171	158	14	313	33	1	206	397	192	918	89	6		0	52	0	27	12	87	16	442	0	43	428	0	34	320	448		2	0	249	0	82	40	0	19	0	1	0	2	620	2	107		2
	342	233	499	244	154	0	190	117	0	198	868	201	1031	110	7		56	42	1	28	12	80	24	322	0	83	356	0	258	206	471		0	15	113	0	59	53	0	15	0	0	0	0	457	2	148		11
	9	332	340	197	96	10	126	154	0	152	1112	168	876	91	0		0	27	2	1	13	84	47	106	0	64	426	0	190	176	335		0	17	60	0	55	61	0	29	0	0	0	0	183	14	11		4
	68	428	191	242	17	16	308	86	0	130	1212	30	661	56	0		0	19	0	0	5	64	76	145	0	33	338	1	156	357	376		0	34	11	0	100	36	0	1	0	0	1	0	398	3	16		1
	70	383	131	257	108	9	145	119	0	102	1179	5	916	26	0		0	7	0	0	17	71	53	99	0	44	382	0	134	406	279		0	52	0	0	325	44	0	6	0	0	0	0	463	8	24		1
	5	562	311	150	26	9	59	0	0	201	974	140	1032	182	0		37	3	14	0	10	58	7	42	1	121	379	0	127	348	367		0	43	0	0	715	43	0	0	0	0	0	0	424	7	32		2
	47	589	936	67	16	5	19	47	0	184	591	92	764	209	0		1	1	0	0	10	25	5	99	0	64	385	0	185	553	386		0	26	0	0	691	49	0	10	0	0	0	0	429	0	8		5
	15	581	1215	144	13	5	8	27	0	95	592	62	781	186	0		31	11	0	1	9	40	0	94	1	90	216	0	428	756	312		0	163	0	0	180	37	0	15	0	0	0	0	226	7	19		2
	121	704	1450	196	39	0	12	5	3	99	593	80	555	127	0		13	4	0	0	8	83	1	37	0	104	338	0	381	831	289		0	0	0	0	232	27	0	12	0	0	0	0	297	42	2		0
	0	584	1428	61	0	5	72	0	0	137	532	0	568	115	0		0	0	1	0	2	40	0	6	0	39	229	0	633	663	242		0	165	0	0	261	0	0	20	0	0	0	0	335	37	1		0
	62	761	1139	69	10	14	37	86	0	263	745	130	661	81	0		7	0	1	0	14	3	0	21	0	49	114	0	973	733	178		0	12	0	0	372	5	0	10	0	0	0	0	361	30	2		0
	126	922	675	7	50	12	27	11	0	352	1060	84	575	29	0		0	0	0	6	13	5	0	17	0	13	70	0	836	453	127		0	46	0	0	351	0	0	5	0	0	0	0	638	9	2		0
	335	1062	549	0	153	14	16	57	5	378	1178	199	393	53	0		0	0	10	2	58	10	0	2	0	64	114	0	647	194	51		0	40	0	0	376	0	0	3	0	0	0	0	459	5	0		0
	442	1249	504	0	163	8	1	20	80	443	1530	208	270	61	0		0	0	0	11	112	30	0	7	0	82	89	0	925	207	6		0	1	0	0	333	0	0	6	0	0	0	0	320	9	0		0
	310	798	707	12	53	4	10	3	111	363	990	117	187	104	0		21	0	15	0	132	51	0	4	0	96	71	0	955	272	13		0	104	0	0	293	1	0	1	0	0	0	0	331	4	0		0
	174	977	912	46	52	1	40	0	181	374	962	123	176	156	0		0	0	11	0	143	33	0	1	0	47	43	0	935	289	0		0	100	0	0	339	1	0	14	0	0	0	0	223	3	0		0
	377	853	358	127	65	6	27	39	208	401	1127	152	147	123	0		70	1	1	9	206	43	8	20	0	88	12	0	1048	375	4		0	89	0	0	549	13	0	0	0	0	0	0	167	3	1		0
	299	890	326	124	29	1	12	2	307	429	1023	258	45	135	0		42	0	24	65	141	63	0	3	0	127	40	0	1544	519	1		0	76	0	0	757	2	0	8	0	0	2	0	91	6	1		0
	386	903	415	161	60	0	0	10	414	441	1080	273	66	155	0		61	0	39	146	123	13	0	16	0	130	82	0	1011	647	1		2	2	0	0	582	2	0	16	0	0	0	0	260	2	0		0
	793	1057	196	129	165	2	0	61	346	495	1096	183	128	164	0		75	0	79	170	136	4	0	16	0	229	161	0	947	666	0		0	42	0	38	363	2	0	7	0	0	0	0	177	35	3		0
	683	1125	107	101	183	2	2	8	456	346	487	175	56	90	0		57	0	98	290	104	11	1	4	0	222	274	0	979	755	0		0	89	0	33	266	10	0	27	0	0	9	0	352	13	1		0
	555	708	358	146	232	11	1	10	345	342	962	200	59	47	0		65	0	28	296	142	1	1	4	0	211	213	0	933	752	2		0	0	0	21	278	12	0	77	0	0	75	0	403	4	1		0
	443	946	511	160	251	64	1	7	348	242	806	57	57	27	0		234	0	50	236	163	7	0	4	0	189	165	0	849	725	0		0	76	0	55	253	5	1	61	0	0	176	0	469	2	0		0
	758	912	423	226	260	85	0	0	381	267	458	137	79	49	17		271	0	20	306	170	2	0	96	0	167	61	0	940	449	4		1	0	0	134	251	1	4	29	0	0	188	0	409	0	0		0
	701	681	566	168	279	12	0	0	412	268	569	54	74	43	202		195	0	14	286	147	6	4	221	0	84	118	0	816	385	0		0	82	0	137	263	0	1	59	0	0	159	0	362	8	0		0
	1060	681	422	139	325	26	0	31	350	306	488	0	46	229	501		107	0	92	264	228	20	0	187	0	143	135	0	221	434	2		0	0	0	118	486	0	0	46	0	0	167	0	165	5	7		0
	1245	623	254	168	311	42	45	16	514	386	527	15	37	245	423		93	0	30	288	257	24	0	183	0	136	176	0	338	332	76		0	9	0	53	672	11	10	24	0	0	131	0	133	16	12		0
	1298	746	178	141	385	55	149	37	577	277	572	0	80	162	459		72	0	115	297	200	2	0	57	0	132	156	0	307	266	268		0	97	0	25	700	20	44	30	0	0	123	0	259	4	3		0
	1292	790	149	95	446	61	37	108	598	420	561	0	6	36	443		37	0	42	269	210	2	0	144	0	139	231	0	670	249	109		0	0	0	81	423	40	64	28	0	0	92	0	104	7	0		0
	1416	742	114	63	525	35	112	168	498	382	676	0	40	152	417		124	0	50	296	133	2	0	85	0	208	264	1	841	214	259		0	66	0	54	369	48	55	62	0	0	74	0	123	62	0		3
	1311	649	133	12	548	27	80	261	393	456	646	0	69	164	367		90	0	53	374	120	16	0	9	0	210	251	0	867	123	191		0	13	0	41	490	21	7	26	0	0	69	1	81	64	0		8
	1195	697	98	0	651	8	278	28	518	440	467	0	122	16	282		107	0	32	406	80	9	0	0	0	144	228	0	576	64	48		0	47	0	20	566	3	9	3	0	0	82	0	77	44	3		11
	1036	611	109	0	552	35	83	3	379	289	462	0	121	58	215		98	0	92	426	69	11	0	2	0	80	143	0	435	178	26		0	52	0	43	485	8	1	2	0	0	62	0	131	17	13		0
	886	467	19	2	608	51	10	14	203	426	379	0	90	54	185		36	0	58	419	84	2	0	4	0	45	147	2	539	127	8		0	0	0	3	303	5	21	1	0	0	59	0	118	15	0		1
	830	301	20	0	605	39	10	2	148	329	304	0	48	29	205		62	0	39	375	109	0	0	13	0	63	129	0	421	129	4		0	79	1	90	225	0	7	24	0	0	27	0	111	65	0		6
	797	330	2	0	510	38	30	46	159	231	368	0	55	25	225		41	0	3	334	124	0	0	0	2	57	37	2	356	323	1		0	2	0	12	206	0	31	33	0	0	23	0	145	68	1		6
	705	521	8	0	683	42	13	37	126	186	211	0	90	26	171		48	0	18	312	189	0	0	0	1	28	69	1	315	299	0		0	58	0	1	165	0	15	54	0	0	22	0	57	64	0		0
	1079	471	5	0	699	42	36	37	90	195	206	1	50	1	139		70	0	38	272	169	0	0	3	0	85	52	0	268	102	26		0	9	0	0	139	0	12	36	0	0	1	0	46	43	1		0
	1298	391	303	0	690	29	12	1	96	128	304	0	107	60	84		33	0	45	311	137	0	0	7	0	147	45	1	198	36	19		0	56	0	0	131	0	20	28	0	0	7	0	1	48	0		0
	1129	138	235	0	697	22	0	37	99	135	469	0	113	48	116		44	0	84	369	119	0	0	84	0	156	36	0	184	48	7		0	44	0	7	44	0	5	11	0	0	5	0	117	37	0		0
	933	205	92	32	791	30	0	18	63	237	330	0	46	92	190		28	0	84	403	93	0	0	8	0	136	2	0	150	63	3		0	25	0	14	0	0	0	121	0	0	10	0	19	21	2		0
	534	214	45	145	875	31	0	4	69	271	299	0	93	176	210		3	2	144	334	65	0	0	0	0	78	0	0	122	279	3		0	136	0	48	28	0	5	297	0	0	0	0	96	32	0		0
	251	282	139	203	727	28	0	1	44	258	286	0	173	252	381		42	0	113	375	128	0	0	0	0	84	0	1	12	384	2		0	0	0	23	61	0	1	298	0	0	0	0	151	12	0		0
	219	266	325	146	681	11	0	34	54	157	197	0	283	328	365		21	1	100	401	193	0	1	3	0	62	0	0	11	207	11		0	126	0	0	36	0	2	237	0	0	0	0	629	8	2		0
	259	154	226	129	498	10	0	6	46	43	157	0	311	416	288		103	0	107	328	261	0	0	9	0	43	0	0	26	215	13		0	3	0	0	4	0	13	171	0	0	0	0	796	13	1		0
	285	373	296	48	499	29	0	24	11	156	264	0	340	345	260		170	0	181	328	251	0	0	0	0	57	0	0	47	166	76		0	105	0	0	7	0	9	123	0	0	0	0	661	29	0		0
	152	408	69	27	577	42	0	82	19	158	308	5	366	345	240		198	0	146	299	268	0	5	29	0	61	0	0	5	94	341		0	11	0	0	12	0	10	121	0	0	0	0	708	48	3		0
	162	244	83	91	799	45	0	11	31	33	340	26	535	292	170		221	12	141	361	195	0	0	68	0	34	2	0	9	85	599		0	0	0	4	49	0	63	119	0	0	2	0	557	37	4		0
	185	111	8	147	782	10	1	54	8	42	268	208	626	252	150		120	129	62	392	75	0	0	27	0	55	6	0	5	27	750		0	53	0	1	593	0	29	111	0	0	1	0	459	41	2		0
	160	96	151	234	572	39	0	34	11	29	220	269	491	194	207		63	145	52	430	103	0	0	46	0	52	0	0	28	95	844		0	70	0	0	801	0	43	85	0	0	0	0	452	58	7		0
	197	274	295	361	608	6	17	2	1	48	253	259	637	187	161		66	165	130	403	76	0	0	19	0	23	0	0	2	202	814		0	101	0	1	679	0	51	74	0	0	0	0	475	117	1		0
	201	377	213	535	468	4	1	52	15	3	298	235	716	201	203		7	212	179	476	61	10	0	15	0	74	0	0	11	77	839		0	173	0	0	550	0	27	63	0	0	1	0	470	143	16		0
	101	188	375	552	289	11	0	19	0	10	354	193	726	109	131		99	243	142	383	105	99	0	3	0	92	3	0	33	59	781		0	2	0	0	525	0	16	114	0	1	0	0	583	123	16		0
	140	23	667	410	195	2	0	7	19	14	444	311	534	86	170		143	179	71	323	152	107	0	3	0	95	7	0	6	300	708		0	162	0	3	447	0	6	169	144	0	0	0	581	99	39		0
	580	153	681	394	131	56	0	88	11	8	408	335	406	101	162		76	225	14	298	283	83	0	21	1	46	8	0	7	575	417		0	54	0	11	406	0	3	142	254	0	0	0	629	95	368		0
	946	52	879	209	208	41	0	2	17	93	404	307	369	176	80		54	170	53	373	301	64	0	30	0	97	0	0	13	763	279		0	48	0	5	381	0	0	135	239	0	0	0	783	22	416		0
	761	235	842	250	279	58	0	43	22	423	341	244	326	163	46		145	241	45	373	211	63	0	25	0	29	2	0	22	687	147		0	187	1	4	404	0	0	156	134	0	0	0	570	26	299		0
	438	295	852	337	312	63	53	6	6	735	308	106	319	226	97		131	305	32	284	106	27	0	76	0	92	0	0	38	817	79		0	205	0	0	269	0	0	168	178	0	0	0	340	58	131		0
	448	193	909	411	228	60	184	4	11	995	183	309	272	268	153		57	271	84	202	67	0	0	100	0	35	1	0	46	590	86		0	129	0	0	541	0	0	171	91	0	0	0	266	51	140		0
	268	23	1045	403	395	94	109	2	8	853	111	317	337	313	174		35	169	35	197	69	35	0	24	0	51	0	0	123	536	97		0	81	0	0	633	0	0	175	72	0	0	0	340	12	120		0
	193	87	1098	273	423	74	163	42	9	735	22	294	529	369	125		25	129	58	206	72	20	2	29	0	71	3	0	290	164	76		0	87	0	0	628	0	0	163	90	0	0	0	433	26	34		3
	110	21	1050	261	243	84	107	16	33	461	13	268	455	308	53		18	232	125	140	43	0	0	4	0	16	7	0	109	187	47		0	15	0	1	710	0	0	168	61	0	1	0	720	29	63		2
	29	107	925	173	426	95	82	26	6	326	19	167	440	351	17		23	340	67	139	28	3	0	0	1	7	13	0	153	179	2		0	146	0	0	675	6	0	185	30	0	0	0	561	17	82		11
	60	117	870	62	324	103	47	22	2	177	25	145	567	348	71		4	205	0	145	35	17	0	0	0	12	0	0	77	117	42		0	7	0	0	1083	57	0	131	17	0	0	0	321	6	35		2
	82	2	999	155	316	128	21	4	0	119	57	51	692	315	3		2	231	11	176	37	2	0	1	0	6	2	0	94	13	51		0	44	0	0	786	58	0	95	64	0	0	0	62	34	32		2
	95	64	927	99	268	125	7	1	0	56	71	73	762	206	8		13	240	113	190	80	1	2	0	0	0	0	0	20	122	40		0	80	0	0	587	46	0	147	108	0	0	0	165	56	17		0
	94	140	1003	104	277	50	0	32	0	68	114	93	833	207	5		3	212	75	239	17	4	0	0	1	4	1	0	127	290	44		0	246	0	0	584	31	0	235	254	0	0	0	121	42	2		0
	213	1	1058	59	416	139	3	0	3	160	139	80	760	452	0		0	69	1	107	18	4	0	0	0	0	0	0	93	356	26		0	74	0	0	730	36	0	271	262	0	0	0	120	16	3		0
	314	44	893	141	491	82	4	8	0	232	101	136	579	420	11		16	129	4	72	11	27	0	0	0	0	0	0	169	625	1		0	126	1	0	949	30	0	364	226	0	0	0	239	6	4		0
	603	301	742	135	475	41	33	73	7	224	77	41	558	451	3		27	145	70	122	10	1	0	1	0	4	0	0	117	456	3		0	245	0	0	1227	17	0	531	209	0	0	0	139	5	6		0
	640	369	1004	105	318	69	0	0	11	255	53	42	430	140	10		11	108	0	42	9	0	0	0	0	0	1	0	2	525	0		0	96	0	0	1086	38	0	590	232	0	0	0	153	30	46		0
	464	365	940	156	330	128	0	52	0	352	57	4	503	113	3		100	136	9	94	4	1	0	0	0	0	0	0	2	349	0		0	94	0	0	1135	69	0	563	203	0	0	0	74	23	11		0
	610	269	1082	19	358	187	0	7	0	435	72	82	614	130	2		126	109	40	58	92	13	0	0	0	0	0	0	21	114	1		0	65	0	0	1109	81	0	674	42	0	0	0	7	24	24		0
	450	397	1055	39	351	131	0	12	13	567	31	240	756	98	0		182	103	79	51	68	3	0	0	0	0	0	0	15	214	0		0	2	0	0	812	55	0	746	3	0	0	0	3	4	10		0
	209	345	1199	78	441	136	0	82	3	541	62	332	713	81	1		194	66	13	57	46	0	0	3	0	1	0	0	2	155	0		0	61	0	0	952	61	0	577	4	0	0	0	26	26	27		0
	183	336	1190	139	326	121	1	2	0	461	62	445	591	91	0		154	34	42	14	82	0	0	1	0	1	0	0	0	39	6		0	255	1	1	947	74	0	580	8	0	0	0	0	9	4		0
	726	310	1309	118	147	158	22	65	0	441	34	554	538	127	3		164	143	0	2	96	1	4	176	0	3	0	0	4	46	7		0	287	42	0	761	72	0	691	3	0	0	0	137	12	2		0
	1182	265	1395	107	39	91	0	6	0	326	66	425	501	85	12		106	234	4	16	69	0	0	342	1	3	8	0	4	91	9		0	167	17	2	945	69	0	847	10	0	0	0	9	17	20		0
	985	358	1726	125	36	40	0	0	0	243	109	381	499	126	13		66	374	52	15	9	0	0	411	0	67	0	0	0	30	4		0	120	9	6	848	88	0	670	2	0	0	0	24	38	0		0
	1135	302	1861	105	53	43	0	12	0	209	46	376	772	135	2		7	398	74	14	26	0	0	477	0	131	1	0	0	39	0		0	302	41	17	864	86	0	577	3	3	0	0	30	2	6		0
	1161	263	1648	139	95	99	1	18	0	257	34	369	616	199	32		34	312	113	44	2	4	1	379	0	56	1	0	1	179	2		0	187	85	3	976	81	0	615	0	47	0	0	205	14	273		0
	1040	344	1671	177	119	71	0	2	0	347	15	388	708	138	93		23	194	4	39	3	4	0	464	0	85	0	0	32	273	3		0	24	31	8	941	66	0	463	0	52	0	0	13	20	641		0
	894	331	2273	189	201	53	0	5	0	364	27	273	722	57	188		20	316	32	186	8	2	2	308	0	66	1	0	0	345	9		0	37	5	2	855	46	0	417	0	67	0	0	98	16	583		0
	929	307	1265	237	100	44	0	1	0	336	20	256	728	175	230		96	294	18	93	2	58	0	233	0	33	0	0	31	301	54		0	28	5	20	614	29	0	256	0	42	0	0	9	13	383		0
	825	229	1118	185	57	10	0	68	0	258	21	135	603	18	259		150	337	31	55	0	91	0	357	0	47	0	0	128	369	59		0	175	22	0	577	19	0	347	1	58	0	0	5	42	261		0
	883	256	1068	240	101	13	0	1	0	212	18	149	586	97	316		121	302	138	58	0	37	0	442	0	28	0	2	324	256	171		0	89	43	10	594	40	0	456	0	81	0	0	49	9	338		0
	726	404	978	199	70	29	0	7	0	129	8	109	575	303	163		173	234	6	62	1	91	0	465	0	55	0	0	342	9	156		0	350	13	0	554	49	0	527	0	122	0	0	10	81	399		0
	257	141	1152	170	45	110	0	8	0	32	29	122	724	84	349		90	269	16	41	101	31	12	682	0	44	0	0	238	40	74		0	336	38	0	586	33	0	500	0	96	0	0	6	81	433		0
	267	47	1203	196	8	18	0	35	0	52	36	194	666	66	339		65	352	6	62	197	64	104	557	0	7	0	6	166	77	139		0	281	41	0	513	28	0	382	0	72	0	0	89	71	432		0
	131	16	773	191	30	14	0	4	0	145	19	61	587	67	369		137	271	144	52	228	57	56	587	0	5	0	12	518	62	167		0	517	3	0	432	33	0	477	0	51	0	0	13	112	448		5
	69	38	758	110	74	2	1	2	0	87	26	118	407	210	467		198	238	131	36	216	47	13	543	0	20	0	4	686	2	89		0	493	40	0	442	76	0	478	0	6	0	0	202	150	448		3
	79	71	843	85	33	1	0	70	10	94	13	115	353	452	371		123	298	32	46	186	97	19	404	0	15	1	23	223	0	153		0	251	75	0	365	29	0	378	1	1	1	0	13	152	506		1
	158	13	460	55	58	2	0	23	1	36	24	98	324	355	275		36	248	5	125	57	53	33	491	0	0	0	78	462	7	38		0	476	8	2	456	34	0	252	2	27	1	0	134	164	646		0
	141	23	336	162	37	43	0	0	0	96	20	127	199	180	440		28	223	2	260	85	83	1	383	0	3	0	48	261	0	38		0	358	44	2	445	56	0	273	0	10	0	0	6	213	592		0
	53	26	674	225	68	73	0	39	0	176	20	119	287	270	492		11	285	10	95	153	55	18	320	0	0	0	59	147	3	83		1	155	63	4	418	62	0	266	0	23	0	0	2	283	574		1
	34	13	685	166	163	119	0	3	0	188	45	86	379	178	471		33	271	2	74	168	86	3	127	1	2	0	76	188	0	4		0	341	21	0	279	98	0	199	0	3	0	0	102	275	475		1
	9	26	627	242	266	109	1	0	0	144	50	57	502	193	546		37	307	36	60	257	99	1	359	0	0	2	100	301	12	18		0	338	58	0	221	138	0	138	0	0	0	0	0	267	360		0
	13	19	467	260	360	53	0	43	0	194	90	156	467	73	532		4	153	45	29	264	93	0	534	0	0	6	127	315	0	0		0	204	103	0	300	130	0	134	0	8	0	0	130	365	405		0
	139	71	331	238	376	138	0	20	0	241	90	130	364	43	591		9	217	5	37	260	100	0	684	0	0	11	114	412	17	1		0	232	63	0	279	126	0	110	0	17	0	0	15	280	468		0
	388	75	548	147	280	200	0	0	0	223	172	134	497	36	644		2	251	0	107	296	50	5	484	0	2	5	88	656	4	1		0	340	25	0	351	102	0	89	0	8	0	0	165	184	421		0
	335	65	581	102	91	188	0	49	0	145	304	222	564	70	757		20	307	3	49	425	58	0	594	0	0	0	100	776	7	6		0	298	31	0	383	78	0	113	0	14	0	0	15	142	359		1
	490	43	667	94	43	160	0	4	0	155	278	292	774	92	922		13	234	0	21	489	41	2	396	0	0	3	27	615	1	0		0	100	14	0	367	92	0	160	0	51	0	0	141	103	354		0
	603	24	437	158	216	191	0	22	0	203	435	175	587	30	900		5	197	0	13	393	39	0	381	0	0	0	24	564	0	0		0	168	0	0	324	109	0	146	0	68	0	0	30	138	287		0
	388	19	477	143	139	242	19	108	0	294	341	207	569	104	1152		53	271	0	6	170	67	0	242	0	0	0	54	613	0	0		0	181	0	1	330	136	0	115	0	24	0	0	6	182	337		0
	536	85	648	179	217	191	194	67	1	268	360	217	460	199	1274		5	123	1	103	42	68	0	136	0	0	0	75	574	2	0		0	235	1	0	398	147	0	96	0	26	0	0	66	225	331		0
	726	196	498	135	369	262	154	51	0	272	376	216	315	263	1042		90	242	0	42	152	71	2	282	0	0	0	109	519	3	0		0	172	0	0	454	159	0	62	0	25	0	0	31	91	373		0
	653	130	442	47	457	172	79	59	31	285	457	171	156	280	1039		101	382	9	95	217	105	20	285	0	0	0	151	533	8	1		0	92	0	3	293	134	0	109	1	23	0	0	61	77	364		0
	483	103	177	75	541	202	65	25	154	314	576	145	132	480	1167		113	443	0	11	328	151	0	343	0	0	5	79	426	2	0		0	99	0	8	253	72	0	127	1	28	0	0	14	30	291		0
	595	58	184	218	582	297	26	19	97	309	645	97	409	559	1146		49	120	12	15	291	160	0	297	0	42	3	149	237	0	0		0	69	0	66	105	130	0	98	0	16	0	0	120	44	223		0
	262	70	188	262	552	418	3	167	109	359	596	44	645	784	1092		37	205	9	14	266	166	0	319	0	77	1	175	295	4	0		0	81	0	44	131	146	0	97	0	30	0	0	24	62	107		1
	185	102	175	339	583	440	46	345	148	314	461	47	841	663	970		85	216	10	60	274	117	0	295	0	53	12	203	441	66	0		0	369	0	47	202	135	0	74	0	18	0	0	119	49	261		0
	161	173	422	357	550	257	173	69	91	375	320	50	521	751	1168		56	251	0	6	286	119	0	334	0	105	1	163	531	33	0		0	483	0	59	155	136	0	82	0	22	0	0	3	75	306		0
	378	129	134	163	531	224	140	45	104	374	270	40	252	665	1146		30	255	5	0	208	142	0	448	0	32	2	173	663	30	0		0	500	0	22	142	118	0	95	0	20	0	3	61	66	289		0
	522	101	303	66	590	328	99	38	74	474	309	46	173	675	1057		5	258	31	0	204	169	0	344	0	37	0	210	677	13	0		0	470	0	19	79	34	0	60	0	5	79	15	83	101	260		0
	354	69	327	230	568	264	158	79	12	481	209	50	158	581	1180		2	287	60	0	82	88	0	290	0	21	1	120	570	2	0		0	451	0	55	42	118	0	57	0	3	141	28	119	149	172		0
	336	68	618	147	641	315	128	181	62	372	98	25	23	563	1241		28	237	16	0	332	15	0	187	1	8	0	64	523	25	0		0	544	0	32	27	37	0	85	0	5	92	5	117	135	59		0
	313	55	813	142	532	408	251	286	98	262	40	19	92	544	1232		91	231	9	0	380	1	0	246	0	7	11	134	361	224	0		1	339	0	107	51	38	0	77	0	11	33	15	67	114	82		0
	377	36	681	57	584	397	185	240	19	305	86	56	49	671	1000		175	333	4	0	249	7	0	264	0	6	2	218	234	327	0		0	443	0	93	102	15	0	39	0	17	37	21	168	76	74		0
	147	34	402	87	409	397	354	62	32	269	29	46	4	775	891		271	256	9	0	268	4	0	183	0	25	15	90	128	40	0		0	463	0	90	201	26	0	33	0	20	17	8	56	26	111		1
	130	10	597	5	535	325	328	33	60	395	0	2	34	537	1042		230	207	22	0	235	8	0	94	0	7	3	140	42	61	0		0	457	8	228	195	27	0	22	1	74	4	52	114	76	87		3
	436	16	336	70	514	271	297	77	24	369	41	28	20	459	963		270	226	28	0	86	5	0	119	0	14	5	160	45	29	0		0	405	0	224	149	43	0	17	0	49	21	62	2	39	103		2
	195	3	481	1	533	253	395	112	7	430	26	37	31	494	711		277	43	12	0	44	5	1	39	0	8	0	258	70	51	0		0	236	9	279	118	18	0	16	0	7	1	45	66	64	34		5
	69	5	436	50	516	323	275	17	79	444	0	19	5	570	498		248	56	21	0	31	0	0	29	0	0	0	142	81	69	0		0	204	0	206	190	14	0	12	0	2	0	38	74	87	26		0
	14	0	82	48	349	222	119	5	26	406	13	2	4	355	638		228	92	24	0	51	0	0	30	0	1	1	258	150	146	0		0	216	0	169	72	30	0	41	0	11	4	4	93	59	29		4
	10	6	210	107	290	209	100	0	44	350	6	0	0	330	725		213	208	50	0	88	2	0	14	0	1	0	213	34	229	0		0	248	0	127	105	9	0	23	0	37	2	2	13	11	15		0
	12	6	143	227	196	138	30	20	100	425	330	1	0	670	901		141	200	15	0	38	0	0	0	0	0	2	321	98	252	0		0	369	0	135	85	10	0	7	0	11	0	0	6	17	4		2
	78	25	406	230	116	246	47	0	7	317	684	13	0	540	355		126	273	21	0	0	1	0	0	2	0	0	110	33	208	0		0	462	0	88	120	20	0	16	0	36	0	26	16	38	11		0
	223	3	252	73	137	73	101	26	91	402	837	0	8	284	320		197	238	6	0	0	4	0	2	0	0	0	85	110	148	0		0	369	0	118	22	42	0	3	0	26	2	39	145	30	6		0
	133	10	109	49	154	37	145	0	88	468	658	0	1	113	757		105	142	11	0	0	0	0	2	0	59	0	96	72	160	1		0	223	0	242	32	16	0	13	0	2	0	34	0	46	0		2
	81	15	223	29	147	155	168	15	92	323	697	26	0	176	1026		136	60	4	0	0	0	0	0	0	64	0	21	86	107	0		0	204	0	274	50	19	0	24	0	11	0	30	118	5	2		0
	14	21	330	17	54	118	238	0	164	326	627	2	2	386	1066		270	36	1	0	0	0	0	0	0	48	0	65	77	15	1		0	156	0	280	75	3	0	2	0	19	0	10	31	20	3		0
	4	3	357	58	209	317	219	16	48	214	605	28	2	660	1283		412	92	0	0	0	2	0	0	0	57	0	0	7	42	0		0	126	0	149	110	2	0	18	0	14	0	5	40	8	2		0
	5	15	594	118	270	314	194	18	91	119	504	173	2	770	1367		381	138	2	0	88	11	0	0	0	37	0	56	105	155	0		0	196	0	95	127	23	0	2	0	13	0	33	8	38	2		0
	0	0	672	259	327	161	334	16	0	163	504	190	22	957	1367		350	189	3	0	207	42	0	2	0	51	0	8	27	39	0		0	128	0	63	2	25	0	30	0	7	0	5	172	12	1		0
	0	4	675	164	311	153	335	0	2	234	452	97	9	966	1243		337	153	6	0	177	8	0	0	0	87	0	74	1	238	0		0	99	0	69	112	27	0	0	0	0	0	2	49	41	2		1
	12	17	196	132	319	292	374	5	1	326	260	93	0	797	633		395	175	11	0	56	4	1	3	0	25	0	110	0	303	0		0	58	0	30	22	5	0	14	0	1	0	7	37	57	0		0
	0	47	237	199	315	320	374	1	41	187	108	15	3	365	396		463	207	0	1	4	1	8	4	0	93	0	13	35	241	0		0	53	0	32	10	6	0	23	0	4	0	0	14	30	8		4
	1	114	537	143	447	199	392	54	6	116	113	39	0	378	297		465	253	0	0	6	6	0	4	0	110	5	15	36	173	0		0	104	0	125	104	13	0	7	0	16	1	4	10	33	0		0
	86	112	885	175	375	361	126	354	86	170	43	133	27	362	627		238	126	0	0	76	3	0	2	0	271	0	4	1	165	0		0	67	0	238	51	12	0	0	0	3	0	12	164	20	0		0
	317	111	1148	414	325	311	274	574	1	222	90	59	264	284	797		110	112	16	0	394	0	0	0	0	199	1	0	3	280	89		0	12	0	257	118	13	0	0	0	8	2	19	47	28	0		0
	412	104	1209	441	198	269	389	644	0	159	27	33	252	248	775		188	200	3	0	436	0	12	2	0	56	0	2	23	212	91		0	24	0	186	88	0	0	0	0	2	9	3	167	47	1		0
	160	136	1270	440	110	315	257	619	1	278	49	44	129	238	455		221	185	0	0	549	0	46	3	0	158	2	0	49	98	111		0	6	0	194	100	3	0	0	0	4	25	1	40	80	2		0
	243	193	853	497	296	348	260	470	3	254	53	44	189	502	413		251	109	10	0	563	0	107	4	0	116	3	0	13	109	88		0	5	0	214	64	19	0	0	0	3	71	1	190	12	0		0
	142	185	1309	515	161	266	331	99	1	230	1	42	174	290	649		322	133	11	0	592	0	70	0	0	247	0	0	53	153	35		3	2	0	126	57	1	0	0	0	3	25	26	6	32	0		0
	92	218	1065	401	291	274	206	341	42	343	24	1	349	284	901		261	176	3	0	349	25	3	1	0	152	1	0	15	73	44		0	14	14	94	37	4	3	0	0	7	68	33	160	34	0		0
	16	267	909	320	261	255	254	471	0	321	5	75	463	394	725		171	115	1	0	212	38	5	5	0	236	0	0	9	36	89		0	8	41	36	28	0	0	0	0	18	49	43	22	3	0		0
	18	356	608	343	169	272	309	888	0	421	12	34	421	458	445		241	97	15	0	167	4	3	1	0	274	0	0	1	17	22		0	12	66	132	112	0	1	0	2	2	13	39	184	45	0		1
	122	310	545	348	225	208	180	856	4	332	8	18	231	385	465		154	34	0	0	83	3	0	0	0	187	2	0	3	82	16		0	16	74	82	52	26	2	0	0	1	57	4	28	70	0		0
	52	328	178	374	77	288	80	545	1	270	27	6	157	207	517		193	146	2	0	57	2	1	0	0	137	0	0	19	66	12		0	2	79	49	179	0	2	0	0	0	29	14	195	106	2		0
	4	375	263	375	119	370	72	619	1	312	16	27	100	138	517		154	272	5	0	97	27	0	9	0	44	0	0	2	92	1		0	5	62	108	174	7	0	0	0	4	2	19	135	145	0		3
	156	482	137	400	85	285	11	870	0	509	13	67	22	181	557		225	149	0	0	75	30	5	11	0	44	0	0	18	10	10		0	0	77	20	203	0	0	0	0	6	57	2	135	142	0		0
	60	354	245	288	88	221	9	1021	0	705	6	19	15	59	476		330	67	0	0	116	11	10	1	0	60	0	0	27	30	5		1	1	63	70	84	1	0	0	0	6	5	0	125	232	0		9
	22	417	212	332	115	163	9	863	0	662	8	57	10	77	428		111	77	0	0	28	12	147	1	0	105	0	0	8	63	0		0	9	47	104	87	1	0	0	0	1	0	0	81	157	0		6
	0	382	57	197	138	155	0	897	10	559	2	93	4	108	361		11	58	0	0	65	0	103	0	0	48	0	35	8	44	0		0	22	25	99	27	0	0	0	0	4	0	1	32	69	0		0
	0	171	427	162	175	29	5	609	11	451	22	37	5	190	187		136	22	0	0	40	2	81	0	0	10	0	49	16	22	0		0	5	13	41	23	0	0	0	0	1	0	0	57	105	0		8
	2	146	236	109	198	1	2	354	1	319	2	71	11	151	243		191	82	13	0	98	0	82	0	0	33	1	61	6	29	0		0	1	5	52	23	1	0	0	0	26	0	6	74	173	0		0
	3	355	176	234	107	152	5	393	0	122	0	54	0	85	484		120	253	0	0	93	0	47	0	0	33	0	53	2	6	0		0	0	28	85	21	0	0	0	0	9	0	2	37	103	0		0
	52	305	227	232	137	92	0	352	2	288	396	37	4	57	662		96	306	2	0	141	0	8	1	0	16	0	28	0	119	0		0	0	31	44	16	3	0	0	0	1	0	0	4	84	0		5
	87	254	261	179	82	105	0	180	14	242	955	26	0	301	720		185	231	0	0	162	0	12	0	0	45	0	30	0	91	0		0	0	9	7	6	0	0	0	0	1	0	0	115	13	0		1
	59	368	519	141	55	169	0	392	0	199	968	51	0	461	868		134	102	12	0	118	0	2	0	0	64	0	23	24	44	0		0	0	55	27	7	0	0	0	0	2	0	0	35	75	0		0
	14	381	513	167	15	110	55	193	0	57	1014	43	0	333	692		122	105	11	0	174	0	3	0	0	179	0	21	0	33	0		0	0	14	3	0	0	0	0	0	5	0	0	65	44	0		0
	3	232	372	135	42	265	205	346	8	78	820	156	22	246	952		108	69	0	0	256	0	0	0	0	110	0	45	1	50	0		0	0	0	8	0	0	0	0	0	0	0	1	6	52	0		0
	2	314	238	46	60	348	140	150	2	69	707	275	0	137	1261		82	114	1	0	172	0	12	0	0	125	0	49	26	2	0		0	0	1	0	0	0	0	0	0	1	0	0	0	60	0		0
	1	50	393	159	46	235	117	41	1	47	494	294	0	78	1358		40	269	0	0	223	0	1	0	0	29	0	58	75	17	0		0	0	17	0	0	0	0	0	0	1	0	0	6	30	0		0
	0	242	309	114	63	121	73	248	0	115	619	288	11	216	1221		165	217	0	0	230	0	0	0	0	7	0	49	189	42	0		0	0	16	0	0	0	0	0	0	13	0	0	94	8	0		0
	3	267	229	207	35	44	52	118	8	69	580	138	317	155	1161		109	132	0	0	152	0	1	2	0	12	0	30	301	32	0		0	0	11	6	0	0	0	0	0	0	0	0	0	25	0		0
	0	199	177	188	84	114	46	29	50	123	402	110	1099	39	1027		32	32	0	0	82	0	7	5	0	16	0	44	253	87	0		0	0	54	35	0	0	0	1	0	4	0	1	56	48	0		2
	0	439	262	179	40	86	1	73	87	84	278	87	1285	185	757		42	90	0	0	148	0	0	0	1	1	8	36	269	71	0		0	1	71	12	1	0	0	0	0	6	2	0	35	56	0		0
	2	416	520	209	26	114	1	381	58	137	237	99	1534	103	552		113	39	11	0	141	0	0	7	0	157	0	5	156	134	0		0	0	71	6	39	0	0	0	0	18	1	0	30	29	0		0
	14	612	727	157	138	220	2	219	266	111	361	136	1330	111	504		21	2	6	0	284	0	0	29	0	231	0	19	153	240	0		0	2	66	1	82	0	0	0	0	71	5	0	287	34	0		2
	287	802	691	304	150	50	1	441	255	119	506	127	976	271	227		17	0	5	0	208	0	0	34	0	197	0	9	53	267	0		0	0	31	0	91	5	0	0	0	15	3	0	371	24	0		0
	575	819	625	312	57	77	4	522	150	59	542	174	524	323	140		15	0	0	0	183	0	0	110	0	190	0	1	55	271	0		0	2	11	0	6	5	0	0	0	16	3	0	136	14	0		0
	269	791	628	238	154	68	119	554	54	49	427	181	530	99	17		1	2	1	0	186	1	0	106	2	192	0	32	240	295	0		0	4	22	0	69	0	0	0	0	58	1	0	127	37	0		0
	343	579	395	231	130	57	172	371	133	54	249	200	382	209	41		0	5	6	0	145	0	0	34	0	229	0	5	244	403	0		2	0	29	0	238	0	1	0	0	96	0	1	299	45	0		0
	215	462	341	244	55	17	208	320	230	73	169	177	282	287	137		0	0	0	0	104	0	0	19	0	272	0	0	92	467	0		0	0	31	0	140	0	8	0	0	43	0	0	120	25	0		0
	167	372	115	332	71	1	117	208	225	13	212	93	236	111	147		0	7	34	0	83	1	0	34	0	249	0	0	258	494	0		0	0	21	0	80	1	0	1	0	85	0	0	164	47	0		0
	152	296	132	252	43	20	112	262	197	12	116	180	266	130	189		0	16	43	0	67	0	0	8	0	253	7	0	304	436	0		0	0	59	0	78	0	0	0	0	96	0	0	233	24	0		0
	127	226	176	167	122	11	89	467	194	50	118	208	221	187	101		0	0	33	0	64	27	0	57	0	279	228	0	264	465	0		0	0	39	0	62	22	0	0	0	79	0	0	19	12	1		0
	215	475	446	46	60	76	47	270	97	43	79	244	559	133	74		0	14	51	0	110	58	0	74	0	317	546	0	262	419	0		0	2	16	0	185	13	0	0	0	62	0	0	276	14	0		0
	193	641	634	94	45	308	57	322	95	102	96	209	891	123	125		0	1	48	0	170	1	0	46	0	288	649	0	196	440	0		0	0	13	0	320	2	0	0	0	28	0	0	26	32	13		5
	107	617	497	139	138	407	68	264	210	150	172	198	862	159	189		0	8	76	0	84	0	3	79	0	118	641	0	397	617	1		0	0	13	0	207	10	2	0	0	27	0	0	213	9	193		8
	127	341	596	173	81	252	36	359	140	218	202	268	665	19	148		0	1	106	0	46	14	1	8	0	168	650	0	447	554	0		0	0	46	2	25	0	1	0	0	7	0	0	41	16	242		10
	48	116	529	216	118	255	21	280	42	369	151	268	554	9	1		0	0	123	0	49	0	1	15	0	204	658	0	201	563	0		0	0	16	1	21	0	0	2	0	7	0	0	140	21	204		0
	14	272	412	120	104	423	10	439	31	473	237	255	550	51	108		0	0	38	0	97	0	0	6	0	181	463	0	32	551	0		0	0	21	0	16	0	0	1	0	26	0	0	48	60	122		0
	26	247	578	16	64	532	10	169	50	390	288	227	504	57	35		0	7	65	0	50	0	4	7	0	140	343	0	203	457	0		0	0	11	0	40	0	0	0	0	6	0	2	78	13	85		9
	10	246	509	23	36	515	3	36	26	285	294	126	330	79	25		33	2	126	0	13	0	0	13	0	128	273	0	28	443	0		0	0	23	0	14	0	0	0	0	44	0	0	0	33	94		1
	8	112	731	69	60	220	3	51	21	135	273	117	394	0	81		3	0	151	0	16	1	0	4	0	43	263	0	79	349	0		0	0	25	0	2	0	0	0	0	44	0	0	0	28	44		0
	11	88	536	164	101	149	0	186	56	194	200	190	189	0	52		8	0	197	0	20	0	0	14	0	83	262	0	12	328	0		0	0	16	0	1	0	0	0	0	9	0	0	24	8	40		3
	10	39	161	214	170	213	0	80	66	231	133	231	298	1	63		15	0	196	0	0	1	0	8	0	84	361	0	5	354	0		0	0	26	0	18	0	0	0	0	12	0	0	5	18	119		0
	1	130	269	167	233	246	0	0	53	205	51	216	334	31	73		26	3	210	0	0	0	0	11	0	90	465	0	10	331	0		0	0	31	0	0	1	0	0	0	17	0	0	58	16	158		2
	93	236	98	185	213	156	0	112	146	164	71	162	238	14	191		6	8	199	0	1	0	0	8	0	62	471	0	2	300	0		0	0	25	0	1	3	0	0	0	10	0	0	9	13	244		0
	413	284	115	218	201	119	0	33	150	65	78	81	315	11	95		0	8	105	45	0	0	0	4	0	97	331	0	4	245	0		0	2	23	0	0	0	0	0	0	19	0	0	0	18	283		0
	455	293	217	199	158	68	0	16	172	55	96	49	271	44	115		1	20	78	62	0	6	1	36	0	73	347	0	3	217	0		0	0	3	0	0	4	0	0	0	8	0	0	0	6	247		0
	358	280	319	254	110	29	0	13	91	83	74	45	384	9	155		0	2	21	24	0	60	0	27	0	108	405	0	6	135	0		0	0	1	0	0	0	0	0	0	7	0	0	18	3	147		0
	410	373	262	297	48	43	0	110	61	299	94	24	515	0	300		0	36	18	43	0	95	0	43	0	62	419	0	1	142	0		0	0	4	0	0	0	0	0	0	13	0	0	30	8	78		1
	265	543	151	230	20	106	40	50	95	407	84	166	640	0	301		7	2	46	56	3	80	1	36	0	45	399	0	15	129	0		0	0	0	0	0	0	0	0	0	3	0	0	63	5	25		0
	225	720	98	131	48	192	232	29	140	422	101	132	782	12	240		22	15	127	44	0	60	2	61	0	64	409	0	100	50	0		0	0	1	28	0	0	0	0	0	5	0	0	23	15	24		1
	75	529	92	78	33	207	197	94	195	511	102	90	686	91	185		0	3	127	64	0	52	1	116	0	145	334	8	52	170	3		0	2	1	5	0	0	0	0	0	8	6	0	21	5	54		0
	173	363	131	15	14	239	81	579	163	560	62	83	783	102	50		0	3	185	43	6	83	0	134	0	113	471	0	279	163	149		0	0	4	0	3	0	0	0	0	19	0	0	14	23	26		0
	117	136	56	119	5	263	62	451	86	508	55	118	753	175	264		0	136	220	45	4	47	1	51	0	140	516	0	371	403	233		0	0	11	0	81	0	0	0	0	31	4	0	27	28	89		0
	30	84	167	98	25	307	86	448	125	465	38	152	502	131	25		0	230	85	42	109	39	6	32	0	150	596	3	442	807	88		0	19	5	0	122	0	0	0	0	24	2	0	0	37	24		2
	19	114	96	24	34	482	43	268	202	676	27	231	509	99	58		0	201	206	68	101	54	1	139	0	166	576	0	426	1062	61		0	69	0	0	28	0	0	0	0	1	0	12	92	89	102		0
	2	404	75	119	35	487	76	251	155	815	18	316	370	78	265		0	184	320	53	96	9	0	188	1	176	388	1	320	1208	25		0	98	0	0	8	0	0	0	0	0	0	34	1	48	113		0
	1	712	61	155	33	433	90	340	200	719	9	297	264	57	228		0	148	316	22	85	88	13	108	0	133	261	0	224	915	45		0	19	1	0	10	0	0	0	0	26	0	34	41	4	121		0
	11	936	53	144	77	342	104	545	192	508	2	350	373	148	230		0	190	214	37	38	37	1	202	0	125	352	0	249	1024	7		0	13	4	0	15	0	0	0	0	8	0	9	7	13	31		0
	0	904	62	182	75	279	179	707	173	799	1	448	338	160	132		0	221	220	103	45	47	0	178	0	121	404	0	135	501	58		0	17	4	0	23	0	0	0	0	11	0	15	26	11	40		12
	3	709	164	47	268	257	256	663	212	910	56	499	317	124	106		0	211	152	125	27	43	1	151	0	60	413	0	140	164	93		0	40	4	0	20	0	0	0	0	8	0	9	99	16	54		0
	0	629	103	86	447	114	144	494	213	722	252	526	269	164	59		0	147	133	75	36	24	0	120	0	103	406	0	306	155	68		0	3	2	0	52	0	0	0	0	1	0	2	104	11	39		0
	0	575	109	108	496	349	197	369	272	694	473	308	172	94	231		0	276	218	54	95	28	0	25	0	116	585	0	416	46	48		0	5	0	1	46	0	0	0	0	0	0	7	72	14	20		0
	63	615	256	38	414	302	280	294	347	645	661	255	130	97	170		0	447	96	64	24	28	0	119	0	79	561	0	265	44	106		0	1	2	0	19	0	0	0	0	3	0	1	18	21	13		3
	659	390	410	63	370	339	231	391	331	692	582	331	44	89	220		0	495	147	107	42	47	4	216	0	80	390	0	420	125	63		0	0	2	0	4	0	0	0	0	11	0	4	2	21	14		8
	835	348	403	26	258	55	239	243	298	587	587	409	226	222	104		0	263	206	193	22	66	0	201	0	81	361	0	403	166	58		0	0	2	0	12	0	0	0	0	8	0	23	14	19	10		143
	628	308	377	31	104	38	191	317	386	565	481	466	118	134	329		0	202	102	42	7	48	1	39	0	85	258	0	298	212	74		0	3	0	0	25	0	0	0	0	6	0	0	26	3	21		254
	464	292	346	10	152	73	229	269	410	455	171	434	66	145	128		0	258	116	0	40	92	0	67	0	46	231	3	470	205	19		0	0	1	0	1	0	0	0	0	2	0	1	32	28	55		160
	307	446	139	14	151	122	186	254	239	482	197	363	37	6	46		0	236	125	6	13	75	0	37	0	61	220	0	613	224	20		0	0	0	0	13	0	0	0	0	12	0	0	96	42	6		30
	287	199	101	10	137	87	164	361	55	449	222	247	11	0	128		1	222	69	12	21	14	0	48	0	39	253	0	687	226	28		0	0	0	0	64	0	0	0	0	2	0	7	1	27	46		22
	71	218	30	22	228	133	165	220	20	273	83	344	19	1	3		0	353	96	8	3	6	0	172	0	22	341	0	641	138	0		0	0	0	0	100	0	0	0	0	2	0	4	1	22	7		42
	159	210	30	30	222	334	113	309	10	266	161	279	79	24	105		0	301	122	15	28	35	13	81	0	50	251	0	383	246	16		0	0	0	0	5	0	0	0	0	2	0	5	15	42	5		13
	104	236	20	36	55	470	85	273	5	241	410	320	141	52	133		0	64	147	2	10	33	1	92	0	32	147	0	149	259	16		0	0	0	0	0	0	0	0	0	4	0	4	65	18	0		17
	257	227	114	17	82	461	53	382	5	162	685	212	121	92	26		0	176	187	1	13	86	0	77	0	73	121	0	35	344	0		0	5	0	0	0	0	0	0	0	5	0	2	75	10	0		5
	521	366	187	8	145	397	48	478	8	56	824	353	94	0	446		0	224	197	1	29	93	0	35	0	71	56	0	97	404	0		0	0	0	0	0	0	0	0	0	8	0	2	12	33	1		32
	685	255	89	4	196	310	80	299	2	13	816	258	119	0	547		0	271	263	4	28	35	0	65	0	52	147	0	41	430	0		0	1	0	0	0	0	0	0	0	0	0	0	3	21	0		11
	682	154	93	2	455	250	114	266	3	3	744	252	266	0	440		0	256	241	0	19	41	0	202	0	93	28	0	48	381	0		0	0	0	0	0	0	0	0	0	0	0	1	0	6	0		0
	780	157	49	14	556	401	153	316	1	19	627	269	252	12	497		0	169	210	0	18	69	0	231	0	111	97	0	100	334	0		0	1	0	0	7	0	0	0	0	7	0	3	41	6	0		2
	1048	351	90	32	452	343	102	337	0	177	580	232	89	29	428		7	275	195	0	31	55	0	168	0	79	100	0	38	331	0		19	7	0	0	92	0	0	0	0	1	0	0	16	34	0		28
	1413	443	102	69	398	120	161	504	0	882	445	246	71	42	419		291	437	215	109	13	44	43	734	0	64	145	0	108	397	8		232	163	0	60	79	0	67	89	0	0	0	1	12	21	67		403
	1142	662	410	390	499	377	184	368	474	1225	275	760	795	15	671		420	461	325	262	170	196	92	655	54	202	162	130	267	269	445		383	250	9	282	413	119	19	107	93	68	0	78	860	42	594		236
	1272	499	463	336	437	321	145	309	953	1304	419	461	1006	325	634		292	540	947	357	307	175	33	358	170	99	252	199	330	816	466		153	154	128	188	730	102	57	121	374	123	110	45	1482	182	636		381
	1370	180	472	283	597	212	59	312	961	882	680	332	830	651	405		236	508	1392	340	339	199	137	250	176	60	437	136	356	782	378		243	243	31	94	310	51	98	156	297	120	325	131	755	95	247		158
	1135	256	139	356	642	331	24	444	638	592	379	299	830	547	384		343	259	1261	397	282	54	161	296	155	63	285	130	193	821	176		132	581	48	121	320	11	44	194	290	114	370	98	743	49	385		170
	1117	193	332	391	603	71	67	544	472	406	750	437	921	451	196		474	469	725	519	480	28	142	432	79	29	202	58	208	796	202		43	791	46	91	341	27	18	216	253	56	389	55	763	55	308		183
	1022	277	147	403	761	258	22	424	288	236	838	524	644	291	325		397	519	323	490	481	45	186	372	94	60	453	36	103	735	229		104	908	13	250	275	19	43	317	168	33	389	107	760	32	145		117
	1080	422	587	332	722	220	79	543	230	313	903	616	625	408	444		373	466	155	346	415	41	65	424	137	50	597	16	107	554	196		260	938	54	265	301	11	74	304	134	37	516	97	252	54	211		197
	876	192	472	380	502	118	60	331	300	362	1059	566	478	495	485		412	452	91	488	405	30	85	419	39	34	479	69	73	378	210		278	755	38	256	453	23	113	285	59	49	544	103	295	33	323		237
	1035	336	337	478	491	377	135	271	228	403	1160	624	615	316	503		463	565	142	391	460	47	150	525	137	42	377	83	121	337	300		280	655	6	265	310	10	62	304	59	65	469	119	222	12	408		129
	1004	212	459	447	614	272	85	145	155	434	947	539	675	373	410		391	616	149	301	321	30	144	553	219	7	336	80	174	388	177		183	675	10	272	325	3	28	335	44	67	480	123	382	40	178		110
	1059	158	723	497	793	55	188	224	121	413	746	397	967	67	286		230	689	223	284	144	22	103	552	39	24	507	22	53	439	183		158	768	10	270	221	8	14	374	34	42	262	113	366	9	184		35
	1443	112	456	633	650	13	366	269	142	374	784	346	1149	121	427		120	516	210	388	173	2	65	668	41	10	362	56	172	441	258		199	930	0	141	243	0	105	288	17	60	223	87	340	31	178		135
	1715	105	534	633	624	12	341	441	94	312	607	324	1131	82	668		159	564	690	281	317	1	24	462	30	6	454	88	143	569	379		124	776	5	149	255	3	88	248	84	40	251	44	159	0	243		33
	1513	56	835	545	607	142	316	379	53	269	683	343	1062	156	596		109	613	717	356	344	0	177	490	25	0	346	87	123	648	239		163	600	3	130	321	0	92	299	120	6	170	51	121	2	280		27
	1566	39	930	635	516	16	411	282	12	198	412	174	1239	378	625		196	647	657	359	316	0	130	864	2	2	182	83	113	471	375		229	684	0	90	266	0	102	253	43	6	405	67	233	10	212		73
	1515	189	901	772	458	0	535	238	16	208	208	174	1264	323	696		103	612	595	311	208	0	112	550	64	3	325	88	253	510	272		276	546	0	3	257	0	91	262	83	6	377	42	195	58	261		99
	1364	172	1054	800	355	0	416	286	23	308	173	235	1241	137	961		173	686	549	255	127	0	105	226	107	0	272	44	191	515	156		138	402	0	12	60	0	18	333	48	5	305	40	203	33	263		80
	1245	74	1114	544	324	0	392	214	30	518	85	166	1270	133	1263		59	592	580	249	83	0	13	313	180	2	239	50	111	402	144		62	334	0	2	3	0	10	419	1	0	104	41	153	15	105		69
	1164	43	1200	458	317	3	301	155	4	638	97	126	1149	12	1213		179	384	490	352	62	0	7	107	203	1	190	9	61	374	143		13	294	0	7	5	0	12	375	1	8	88	46	64	29	194		10
	715	13	815	607	295	0	324	153	12	622	57	96	1157	10	837		264	255	544	295	2	0	5	26	160	1	157	32	107	417	71		2	308	0	21	2	0	16	285	0	1	104	22	61	0	71		52
	980	10	962	680	196	0	381	223	24	564	26	16	1652	35	879		203	260	480	246	67	0	0	31	74	0	119	2	18	355	31		0	275	0	29	1	0	0	183	0	9	79	6	105	4	53		106
	861	1	860	496	253	0	461	181	25	665	28	3	1985	163	1112		124	251	445	166	8	0	0	73	55	0	114	5	16	433	52		0	348	0	68	5	0	14	350	0	8	22	0	226	0	70		99
	674	183	744	342	210	18	481	97	3	650	49	2	2141	156	841		86	99	358	72	0	0	0	96	11	1	74	0	6	465	153		9	320	0	147	7	1	28	255	1	24	53	0	97	5	49		38
	815	403	469	397	188	69	394	69	5	524	213	2	1690	294	615		68	121	314	147	0	0	0	145	51	0	5	7	10	486	275		4	256	0	220	2	0	12	179	7	48	10	0	31	36	36		29
	712	350	517	324	240	52	474	92	0	576	265	1	2004	395	962		64	74	238	163	0	0	0	189	20	0	4	21	6	356	283		0	62	0	231	2	1	1	164	0	49	11	0	36	6	91		5
	569	310	495	375	205	2	577	87	1	467	254	1	2242	383	1047		144	14	232	133	2	0	1	94	1	0	17	3	12	355	179		4	76	0	235	26	0	2	147	1	30	17	0	83	19	89		24
	605	192	869	457	165	10	683	85	0	456	376	1	1948	318	906		108	53	175	134	5	0	0	35	0	0	2	6	10	369	166		6	151	0	234	101	0	0	161	24	6	22	0	37	2	34		39
	689	283	737	561	110	47	606	62	0	443	542	0	1498	296	656		31	49	130	143	5	0	0	79	41	0	8	10	1	359	189		8	179	0	183	185	0	0	196	113	1	4	0	3	0	46		10
	514	194	549	383	86	93	651	80	0	457	529	0	1052	112	622		19	49	55	187	0	0	0	48	3	0	20	1	12	416	153		25	69	0	139	407	0	0	154	107	0	1	0	67	0	54		23
	788	508	628	415	100	128	805	132	0	500	339	6	839	147	651		62	421	19	253	0	2	12	312	63	1	3	1	45	512	81		329	187	0	185	349	1	15	258	52	11	0	0	31	7	30		220
	518	715	454	623	238	183	1310	170	15	563	350	13	802	109	993		23	1049	51	362	41	89	170	419	66	81	14	45	127	428	309		225	391	0	309	286	115	175	221	304	32	4	68	518	43	220		331
	770	409	523	344	373	263	1152	163	61	501	288	138	901	270	748		64	972	234	528	369	67	228	299	175	128	24	69	225	513	121		293	463	11	157	487	102	191	158	440	36	168	203	1109	61	281		243
	828	344	74	279	472	53	1158	208	191	325	415	176	767	228	626		27	841	212	462	591	30	292	341	143	113	55	47	123	371	156		147	507	20	128	499	50	160	165	498	24	229	154	1483	129	264		62
	1092	395	410	238	534	110	1024	265	241	373	217	120	850	250	641		75	671	428	344	645	38	421	380	136	62	20	62	96	517	111		136	450	48	126	418	36	102	206	552	5	500	119	1324	110	260		146
	1235	331	529	248	626	53	984	375	243	435	212	82	1203	126	576		114	383	476	445	809	18	530	446	128	101	32	135	94	462	65		90	460	31	129	495	29	70	255	570	33	654	90	1536	108	404		206
	1352	565	346	279	703	100	969	544	235	487	96	108	1365	29	357		69	326	336	339	761	12	513	502	58	96	36	174	72	640	41		103	266	30	173	261	16	61	206	686	34	702	70	1439	168	494		52
	1237	455	422	267	836	30	1063	474	169	1093	167	101	1216	155	224		4	149	427	354	704	2	437	337	3	123	2	259	25	531	177		141	139	6	91	119	22	49	101	727	26	659	19	1164	170	649		74
	1133	240	387	131	785	33	962	416	113	1167	185	71	1092	19	160		11	70	493	257	773	2	528	232	40	85	5	251	54	519	92		77	78	27	113	120	11	8	170	726	18	568	29	699	192	736		33
	1059	198	268	257	988	73	778	487	78	1058	45	113	1186	108	177		15	227	357	94	813	0	712	276	20	10	21	208	27	562	187		44	98	9	4	172	9	1	291	743	47	598	29	453	220	744		71
	1229	106	352	248	974	0	685	505	116	824	176	118	1148	275	266		4	260	366	202	939	1	950	349	49	6	3	211	16	692	224		62	85	22	23	80	1	5	382	796	41	531	24	506	239	760		52
	1063	39	410	74	977	44	740	498	106	919	253	155	1267	5	420		5	210	264	433	1080	0	963	350	7	2	17	97	19	715	274		25	21	30	36	135	8	3	441	740	150	573	35	524	190	879		51
	794	443	131	234	820	113	579	413	226	906	442	153	1412	41	536		8	202	204	379	1098	3	971	164	44	2	14	41	30	756	195		49	113	16	25	150	24	26	236	695	269	161	2	859	248	747		65
	955	492	74	150	857	0	348	442	217	838	498	87	1235	154	490		0	83	266	298	971	3	1020	187	13	1	18	99	32	587	113		48	198	10	14	140	30	16	192	665	178	235	0	998	211	754		31
	820	279	58	125	531	63	262	351	143	620	464	32	1588	67	426		1	87	269	252	957	15	911	173	116	0	29	60	43	576	87		56	274	2	18	53	36	42	125	723	155	193	5	1055	163	875		63
	721	301	82	178	670	0	314	534	156	657	344	15	1135	100	613		9	85	188	201	883	21	818	239	231	3	7	16	53	535	82		35	249	4	1	18	19	44	177	594	166	122	25	1355	152	687		11
	722	185	26	130	251	0	334	431	200	907	433	3	476	140	869		0	110	171	188	762	9	736	64	264	20	1	29	72	406	42		4	261	33	6	13	0	0	204	614	126	115	37	1247	152	501		1
	545	277	8	6	271	18	234	349	150	964	279	3	748	58	831		0	109	170	118	607	25	649	210	149	44	13	28	28	257	21		0	383	3	5	0	0	12	170	523	71	79	10	1229	162	379		3
	629	219	14	1	159	0	303	281	76	672	392	1	750	25	910		0	102	118	166	697	4	515	289	113	16	6	46	14	218	47		1	290	0	0	0	0	0	17	750	38	25	0	1072	115	258		0
	493	56	1	18	275	16	508	255	79	707	318	0	1006	54	786		0	56	263	24	732	16	444	307	95	0	6	18	31	270	13		19	166	0	0	0	0	5	28	935	25	37	0	880	39	125		3
	554	305	0	150	259	1	482	281	63	785	280	0	763	24	598		0	8	296	28	522	1	182	220	85	1	7	36	14	216	15		9	68	0	1	0	0	0	41	864	10	22	0	781	100	109		1
	540	232	0	130	67	0	486	255	14	467	141	0	669	43	559		0	54	183	202	474	1	140	44	66	0	3	27	0	352	2		2	73	0	0	0	0	0	44	532	2	3	1	676	126	19		15
	343	201	8	192	386	1	405	271	10	668	113	0	908	226	545		0	18	182	73	469	0	107	35	86	0	1	56	3	101	12		15	110	0	0	0	0	0	8	524	3	0	0	1056	215	31		21
	324	146	0	235	130	1	399	229	0	559	103	0	1202	306	416		0	3	156	73	480	8	63	3	124	0	3	42	3	216	4		0	81	0	0	0	0	0	9	433	0	0	0	791	198	37		1
	220	64	332	171	436	21	273	130	0	478	52	1	1358	166	509		0	15	114	42	502	1	130	3	115	0	5	29	7	67	16		2	126	0	0	0	0	3	59	476	0	0	0	306	79	10		0
	188	79	273	93	371	218	157	118	0	420	163	4	1142	134	566		0	8	160	57	475	0	147	5	111	0	3	36	4	244	58		0	179	0	0	0	0	0	0	424	0	0	0	125	60	2		0
	188	11	216	129	488	286	108	130	2	351	195	0	1227	146	605		2	20	110	29	489	0	147	11	81	20	3	41	0	204	67		0	194	0	0	0	0	0	0	181	2	0	0	279	67	1		1
	139	4	127	200	507	104	89	114	0	217	153	0	1437	263	598		0	29	153	51	522	0	186	13	77	9	0	1	0	134	115		2	127	0	0	0	0	0	9	388	1	0	0	506	126	4		1
	13	72	118	157	201	22	100	106	0	159	137	0	1500	476	576		0	21	38	60	481	0	119	0	43	35	0	22	0	117	98		1	178	0	0	0	0	0	0	359	0	0	0	476	121	6		3
	35	132	98	413	559	21	114	24	0	139	14	1	1230	429	399		2	11	93	29	500	3	33	3	15	12	0	16	2	72	58		17	177	0	0	0	0	0	9	181	0	0	0	501	147	4		64
	104	124	197	545	404	42	204	141	0	170	1	14	817	479	333		46	25	52	100	419	12	173	210	16	18	5	17	4	26	0		83	113	0	91	0	0	7	88	214	1	0	5	463	105	12		406
	173	74	169	582	567	169	230	218	35	257	31	372	761	439	484		159	64	122	179	318	52	451	517	152	174	0	82	25	46	166		135	268	0	278	5	71	50	190	613	16	0	101	777	80	524		455
	94	80	218	380	934	198	278	179	159	292	141	488	706	753	432		212	158	378	72	82	12	698	409	214	175	7	71	94	93	256		142	338	15	305	1	122	48	109	1013	74	175	178	669	353	738		384
	92	59	82	169	633	420	223	205	264	453	179	401	806	512	533		191	167	542	41	19	29	729	238	135	125	1	86	134	50	156		203	352	35	242	6	76	98	81	968	46	281	188	391	325	489		421
	47	157	98	147	711	98	101	176	315	401	199	98	943	451	571		160	118	397	75	113	8	721	199	127	137	81	6	49	151	45		249	407	14	243	15	49	107	152	720	98	178	193	290	324	279		348
	32	108	45	46	583	46	41	134	282	297	217	62	1083	325	586		188	112	221	64	274	0	651	32	176	177	76	9	91	157	23		235	465	4	117	21	56	58	214	725	116	131	121	139	307	504		318
	106	55	41	73	497	75	112	97	289	293	380	83	1209	611	410		172	135	335	31	231	0	635	158	243	151	38	109	64	155	12		388	297	2	142	1	46	15	161	846	117	41	40	403	375	899		442
	136	131	166	98	503	29	43	160	227	206	467	102	1011	526	447		104	45	232	69	228	0	526	208	193	150	32	132	71	150	2		342	152	0	214	36	61	12	78	617	92	31	47	412	386	1057		381
	152	79	41	101	374	73	38	171	180	299	454	115	975	294	399		86	31	386	29	340	0	343	46	207	216	22	68	112	235	1		405	56	0	234	62	63	24	78	814	92	47	24	286	453	940		363
	143	132	62	18	289	94	165	161	148	345	537	129	914	160	320		117	41	411	112	354	0	167	18	176	310	46	48	145	254	9		196	92	0	166	31	40	11	61	774	140	48	3	105	529	1101		279
	231	90	157	107	517	51	232	82	103	334	536	320	799	185	286		148	47	278	19	182	0	180	50	144	366	21	71	112	261	26		292	110	0	141	20	41	3	31	630	128	53	5	109	658	1326		504
	335	90	262	162	695	59	198	46	37	323	452	223	716	249	305		209	0	334	38	196	0	214	38	157	453	17	151	94	193	15		343	149	0	70	6	26	9	45	505	94	19	26	207	648	882		526
	461	137	250	93	864	47	213	24	3	163	303	249	723	232	199		194	4	468	21	262	0	177	60	73	527	24	40	96	310	10		279	238	0	75	2	8	0	66	241	96	15	48	79	810	870		375
	418	44	124	118	1166	153	270	16	4	202	476	388	546	408	144		192	4	586	72	208	0	150	183	53	624	5	58	92	237	0		104	304	0	39	0	12	0	26	608	239	0	21	55	895	775		177
	584	91	184	68	890	370	220	40	8	306	502	177	382	537	254		189	1	676	72	292	0	281	125	37	588	19	29	48	142	0		95	306	0	113	0	2	0	5	720	304	0	73	28	1035	877		46
	603	28	58	82	961	338	171	48	0	500	369	101	349	387	268		163	5	688	100	342	1	347	5	106	637	10	10	77	95	0		140	274	0	134	0	13	1	2	635	405	1	72	14	882	839		33
	584	39	55	20	604	150	284	36	21	555	462	49	312	370	183		116	4	539	92	341	2	146	11	102	611	1	5	66	64	0		65	68	0	90	0	3	0	1	510	411	0	14	29	827	726		24
	567	89	18	52	458	135	359	21	0	556	341	101	164	410	60		38	21	316	41	109	0	135	5	38	479	4	2	38	61	0		49	23	0	34	0	0	0	1	559	515	0	4	13	573	854		14
	457	42	102	3	595	218	285	16	1	442	452	56	233	395	116		9	0	303	36	48	0	175	21	45	336	1	0	16	101	0		29	86	0	69	0	0	1	0	496	448	1	0	1	348	627		29
	314	151	191	26	693	171	285	11	0	444	533	30	194	428	57		2	0	218	21	92	0	169	49	20	410	0	2	14	27	0		51	57	0	57	1	0	0	0	588	518	0	0	2	447	573		41
	260	199	169	0	636	177	295	0	0	378	366	24	208	534	65		11	0	86	59	6	1	110	3	18	404	0	0	10	144	0		37	9	0	45	0	0	0	0	395	543	0	0	0	432	332		0
	221	231	65	0	205	116	82	0	0	418	278	54	320	632	44		2	0	137	33	28	0	75	9	25	427	0	0	16	140	0		17	7	0	10	0	0	0	0	122	610	0	0	0	496	152		4
	158	83	30	0	134	278	283	0	0	377	285	54	402	548	46		1	0	215	9	24	0	7	0	14	416	0	0	8	97	1		7	5	0	0	0	0	0	0	192	692	0	0	0	549	165		1
	151	84	32	0	308	207	232	1	0	561	280	21	383	618	72		0	0	181	39	6	0	14	0	47	359	0	0	10	0	0		11	8	0	1	0	0	0	0	34	642	0	0	0	525	133		5
	87	108	82	192	516	177	374	0	0	557	280	15	239	652	19		0	0	253	13	12	0	37	0	40	295	0	0	13	0	0		5	0	0	2	0	0	0	0	153	607	0	0	2	431	96		2
	67	87	158	277	527	249	277	0	0	627	237	15	287	581	8		0	0	174	67	64	0	36	0	6	320	0	0	0	0	0		4	3	0	9	0	0	0	0	217	629	0	0	0	439	221		3
	10	99	182	234	461	368	194	0	0	547	196	24	327	600	141		0	0	84	80	19	0	18	0	5	267	0	0	2	0	0		3	0	0	0	0	0	0	1	84	561	0	0	3	421	164		11
	37	34	247	294	278	8	143	0	0	520	72	13	265	581	85		0	0	95	45	0	0	2	0	2	283	1	0	0	0	0		0	0	0	5	0	0	0	0	54	653	0	0	0	267	47		16
	59	165	231	334	781	378	91	0	0	504	68	9	65	728	245		0	0	77	69	12	0	11	0	0	195	2	0	10	3	0		1	0	0	16	0	0	0	0	70	497	0	0	1	226	150		3
	75	263	328	160	991	433	53	2	0	774	47	0	142	543	262		0	2	102	31	21	0	85	0	0	224	0	0	1	0	0		9	0	0	40	0	0	0	0	16	559	0	0	0	174	107		1
	281	375	300	218	945	38	112	53	0	776	99	1	193	408	76		85	25	88	95	7	3	278	204	0	249	0	0	11	0	2		255	8	0	95	0	0	14	52	2	594	0	0	2	109	24		158
	596	466	263	439	721	269	92	105	35	670	123	44	347	373	245		186	77	55	103	134	22	282	455	88	308	0	45	111	1	27		188	8	0	92	11	71	14	216	434	620	0	10	222	36	161		360
	533	530	424	326	530	179	97	154	130	501	92	125	508	667	265		319	138	363	35	251	21	270	436	285	564	36	39	207	37	157		294	1	1	112	51	133	2	164	735	782	3	26	540	512	396		154
	420	483	481	457	487	156	172	180	193	725	145	127	319	955	527		388	119	507	75	89	8	117	313	245	673	47	28	114	93	214		513	1	0	162	120	91	27	183	397	655	24	64	397	547	633		176
	295	463	625	421	340	152	149	297	324	956	128	144	445	636	504		468	1	369	77	44	14	98	394	83	673	98	47	86	49	143		462	12	13	110	56	86	22	211	338	589	53	19	342	353	735		93
	216	325	596	494	449	15	166	451	293	1075	75	130	576	375	102		290	88	237	49	137	11	109	380	62	499	104	9	99	142	152		533	43	41	305	15	78	7	221	509	523	41	24	355	296	818		90
	270	384	570	399	511	37	149	476	247	780	397	151	610	498	247		237	66	294	72	195	22	98	263	16	510	29	47	73	108	169		388	90	6	254	0	25	8	147	584	529	18	3	294	393	886		45
	175	554	711	160	546	111	7	346	198	1036	611	201	857	458	231		227	43	318	52	223	29	76	32	6	637	0	32	125	67	148		345	181	4	129	3	17	1	240	538	476	89	9	258	482	645		114
	219	539	515	76	436	173	32	318	202	984	478	167	1078	377	160		458	69	369	9	149	1	109	53	16	637	3	23	131	45	68		215	106	19	154	0	6	2	268	533	541	99	0	144	622	828		94
	222	300	620	35	297	201	15	200	153	769	294	159	1232	207	147		571	32	376	105	72	3	109	25	13	673	17	19	16	21	29		160	150	10	64	5	18	4	254	542	481	170	0	280	636	836		124
	183	309	704	57	731	159	39	158	88	881	277	102	1190	202	215		544	66	299	97	134	7	197	128	67	618	3	11	46	52	45		46	143	3	80	4	10	2	171	604	350	179	1	575	669	871		116
	277	296	717	51	867	30	7	175	40	691	371	81	1120	262	121		394	54	366	59	151	23	223	135	71	580	17	5	108	59	108		172	101	0	106	10	38	0	32	660	250	176	0	639	310	578		63
	275	198	853	14	794	36	1	167	3	752	484	36	735	499	31		426	17	279	31	560	5	243	52	61	694	2	6	95	30	174		108	76	31	87	7	25	0	112	602	245	248	0	376	221	550		44
	153	138	948	30	911	46	1	218	16	550	548	31	252	674	124		431	69	302	0	188	1	459	60	79	531	3	0	52	0	182		152	54	0	31	17	33	0	88	451	241	157	0	106	193	579		41
	74	123	888	81	844	18	3	166	11	605	558	76	232	782	125		415	60	192	28	189	1	354	61	28	547	1	10	57	0	190		100	124	18	12	9	44	0	164	323	403	151	0	365	262	558		63
	70	43	840	20	988	206	21	109	6	356	561	81	431	907	71		485	36	218	0	113	2	143	15	33	504	0	4	42	13	195		97	44	1	2	0	35	1	89	357	480	71	0	582	412	354		12
	177	87	679	87	1016	213	199	109	1	313	591	95	611	1272	77		448	57	182	0	199	0	162	12	20	518	2	0	40	5	224		25	2	0	28	0	41	0	173	134	485	40	0	612	333	257		0
	207	47	578	3	1098	124	324	40	0	229	562	115	450	1421	23		422	55	198	0	192	0	174	2	1	416	4	5	13	5	298		55	1	1	47	0	15	0	29	521	424	42	0	539	267	266		5
	65	36	369	51	1207	79	321	88	0	135	584	162	253	1363	49		422	46	146	0	380	0	42	0	2	430	0	1	23	2	290		42	10	0	81	0	11	0	70	892	391	10	0	530	277	337		3
	7	15	277	27	1038	12	180	26	0	143	437	157	282	1241	44		355	22	146	0	165	0	41	0	1	391	0	0	24	0	262		6	4	2	140	0	1	0	8	1050	233	1	0	483	69	181		1
	20	217	312	8	639	153	178	10	0	212	431	65	309	1274	33		358	23	137	1	105	0	65	0	1	285	1	0	22	0	272		18	4	2	106	0	3	0	13	998	92	21	0	128	38	252		0
	11	416	262	0	716	223	108	0	0	199	258	53	172	1507	19		376	14	78	0	189	0	107	0	15	300	0	0	3	0	251		7	0	0	36	0	0	0	16	810	177	1	0	299	143	263		0
	10	266	440	4	684	92	35	0	0	354	250	34	96	1164	6		299	0	65	0	118	0	97	0	63	210	0	0	2	0	229		2	0	0	23	0	0	0	1	673	164	0	1	408	197	191		0
	1	154	366	0	574	325	15	3	0	334	259	24	57	1238	29		369	7	29	0	72	0	39	0	8	208	0	0	1	0	226		0	0	0	2	0	1	0	5	598	71	0	1	613	54	304		1
	1	90	239	1	352	248	39	0	0	271	153	37	22	1159	16		262	0	15	0	35	0	0	0	6	163	0	0	1	1	154		0	1	0	1	0	4	0	0	584	124	0	0	513	40	153		0
	4	121	440	0	335	207	78	0	0	114	171	11	58	793	0		200	0	27	0	36	0	0	0	0	132	0	0	6	1	170		0	0	0	0	0	1	0	2	426	116	0	0	386	37	153		0
	22	112	614	151	400	188	116	0	0	65	123	10	5	967	1		254	0	80	0	41	0	19	2	0	153	0	0	0	1	234		1	0	0	0	0	0	0	0	252	181	0	0	303	6	150		0
	3	90	455	104	397	240	143	0	0	106	133	3	6	1249	21		110	1	159	0	0	0	14	0	0	139	0	0	0	3	218		1	0	0	0	0	0	0	0	279	157	0	0	193	62	143		0
	3	117	329	105	520	216	155	0	0	314	137	2	20	1138	3		112	0	60	0	0	0	22	2	0	250	0	0	1	0	123		0	1	0	0	0	0	0	0	288	127	0	0	64	40	74		0
	0	134	115	184	452	216	229	27	0	52	201	0	0	1089	35		157	1	148	2	0	0	3	2	0	271	0	0	6	0	57		14	0	0	2	0	0	0	4	299	147	0	0	24	135	181		8
	76	277	298	132	503	183	247	65	0	19	272	8	55	744	3		509	10	229	111	0	4	150	181	17	267	0	3	0	0	93		67	36	0	114	0	2	13	65	264	91	0	0	29	52	172		143
	109	673	175	141	416	106	310	138	36	394	263	134	202	739	58		763	28	89	334	13	44	241	467	93	231	1	114	42	1	213		56	20	0	564	21	15	12	374	698	154	0	2	348	83	346		321
	31	847	201	86	376	90	389	171	127	978	295	249	408	885	112		857	101	364	177	235	97	46	402	97	364	1	194	101	82	188		49	37	7	667	119	50	18	250	764	223	72	39	414	332	181		175
	65	653	286	136	289	118	425	154	224	959	454	223	750	608	112		813	94	287	27	209	90	55	238	89	399	28	121	147	132	156		48	52	0	435	119	22	86	256	766	143	252	90	138	364	44		138
	109	457	433	334	176	56	377	100	292	923	601	282	617	652	277		569	122	170	79	166	78	45	112	97	450	129	95	76	173	202		55	74	0	507	135	44	96	176	597	356	420	112	396	275	106		116
	125	420	496	467	211	64	317	81	262	875	602	162	825	880	235		576	52	240	18	127	50	86	124	80	460	131	94	59	103	94		30	80	3	579	126	38	27	193	556	482	367	79	345	211	175		656
	118	390	404	420	154	174	336	176	184	762	704	134	650	709	104		575	9	324	53	72	89	51	188	125	341	55	155	48	106	52		33	47	0	468	50	33	43	334	875	530	148	81	241	81	174		1335
	88	407	366	640	377	128	150	80	246	961	642	153	957	952	146		498	4	339	17	11	65	30	255	162	330	7	186	44	103	71		52	55	13	401	42	34	5	263	767	396	120	90	533	52	192		1334
	83	409	298	530	371	150	143	83	196	795	744	69	924	976	204		432	31	118	21	98	13	45	563	206	285	11	187	60	106	84		132	46	27	450	2	17	27	297	521	248	78	59	327	149	163		1399
	76	401	365	644	156	120	220	94	122	816	870	17	604	901	287		362	21	62	11	40	1	18	564	247	349	11	217	88	34	128		187	15	27	481	44	8	6	217	848	378	34	53	338	98	242		1031
	15	491	380	658	90	88	114	136	118	552	693	7	337	648	594		252	46	50	17	3	2	15	740	238	470	61	193	155	59	492		248	27	25	438	4	0	11	291	649	332	27	42	143	51	275		868
	17	535	368	321	296	66	45	142	130	355	545	5	184	725	894		409	63	41	20	3	0	61	587	262	262	117	52	57	112	697		209	25	3	472	1	0	13	339	441	199	26	26	226	61	332		1069
	10	446	294	188	365	113	16	201	168	453	384	18	163	815	1029		336	28	42	14	0	41	58	589	269	280	46	47	82	127	516		130	5	19	420	0	0	20	312	405	199	5	3	246	99	492		1352
	7	420	287	180	339	105	16	310	108	435	369	59	139	581	530		279	53	59	2	0	154	22	670	229	234	3	0	36	89	390		82	0	17	494	9	0	14	197	536	205	25	11	104	46	412		1258
	4	401	381	245	318	92	63	302	90	398	255	35	83	409	740		312	61	34	30	5	122	13	726	130	148	43	0	91	117	285		68	10	4	531	27	0	9	188	537	237	1	6	115	22	322		1330
	2	354	283	283	302	82	227	259	83	175	323	103	59	427	691		176	73	44	78	5	173	18	661	123	93	43	0	66	50	118		77	7	2	431	1	0	5	208	663	421	0	0	43	20	141		1022
	1	490	339	155	251	91	141	177	133	115	354	19	63	435	388		186	47	53	57	0	144	9	496	151	203	53	6	60	64	4		49	6	13	262	25	1	9	127	672	243	20	0	32	28	14		428
	0	434	402	308	288	56	61	214	108	28	450	7	102	181	561		141	2	53	16	0	140	1	358	123	196	7	8	66	42	2		6	1	0	155	0	1	3	81	516	235	5	0	8	17	23		39
	0	311	352	268	495	67	22	250	90	172	413	1	64	295	522		156	2	81	14	0	144	5	447	78	163	61	0	58	13	1		0	0	2	35	0	0	0	26	597	103	6	0	7	0	17		257
	0	197	237	290	487	121	3	257	13	89	197	0	116	199	646		114	0	59	20	0	223	0	463	46	88	61	0	16	7	5		2	0	0	133	0	0	0	5	433	22	1	0	2	11	15		202
	0	143	232	235	484	128	63	67	5	0	81	0	51	266	753		139	0	2	4	0	181	8	471	23	75	28	0	9	6	0		1	0	1	100	0	0	0	4	444	63	0	0	13	5	9		36
	0	166	139	145	400	89	0	93	1	49	53	0	25	191	748		108	0	24	17	0	137	16	590	19	72	10	0	47	2	0		1	0	0	105	0	0	0	1	460	31	0	0	23	66	3		66
	0	71	79	142	634	100	0	118	0	74	15	0	58	191	540		74	0	29	1	0	148	0	525	1	62	16	9	33	2	0		0	0	0	102	0	0	0	0	454	46	0	0	1	11	0		32
	0	11	72	120	780	79	0	38	0	4	136	0	112	385	354		37	0	5	0	0	188	8	314	0	15	2	1	3	0	0		1	0	0	49	0	0	0	0	524	37	0	0	16	12	2		30
	0	30	127	185	677	78	9	146	0	1	245	0	306	298	314		22	0	1	0	0	158	0	425	1	48	1	0	3	0	0		0	0	0	15	0	0	0	16	580	27	0	0	1	6	0		3
	0	13	404	64	665	51	11	117	0	76	181	0	189	526	590		30	1	16	0	0	86	0	392	1	47	0	0	6	0	0		2	0	0	34	0	0	0	21	371	0	0	0	0	10	4		12
	0	6	473	90	548	89	17	126	0	25	156	0	140	742	430		43	0	0	0	0	52	0	265	0	59	0	0	47	0	0		0	0	0	100	0	0	0	54	271	21	0	1	0	2	0		2
	0	15	389	60	381	49	7	144	0	33	201	0	118	971	442		12	0	1	1	0	36	0	288	0	41	0	0	0	0	0		0	0	0	59	0	0	0	9	239	4	0	0	2	0	1		12
	0	9	282	154	421	90	0	194	3	66	125	0	70	488	411		18	1	1	0	0	63	0	280	0	24	0	0	2	1	0		8	1	0	39	0	0	0	3	98	84	0	0	2	0	0		2
	7	0	329	236	390	46	0	166	0	15	13	0	151	468	337		12	0	1	0	0	147	0	439	0	23	0	0	0	0	0		2	0	0	3	0	0	0	2	83	86	0	0	0	2	0		27
	34	15	249	205	372	109	36	169	0	191	0	0	103	407	211		140	111	0	36	0	114	125	892	0	14	0	2	35	5	1		197	12	0	61	0	0	10	142	146	73	0	1	5	12	1		829
	92	239	170	241	289	95	230	189	1	287	4	23	198	160	305		53	174	15	24	58	191	156	997	42	44	0	73	97	11	128		135	32	0	165	19	0	104	355	327	233	0	30	143	33	189		1668
	80	140	351	142	642	93	261	0	100	146	9	180	136	537	427		45	143	96	5	178	188	239	730	162	29	53	104	86	66	334		64	4	11	203	27	4	194	477	831	284	17	113	254	217	188		1897
	49	131	540	146	381	130	256	125	278	69	158	331	221	582	384		102	71	217	6	88	275	179	788	74	22	53	98	55	67	85		32	26	2	146	87	10	154	468	816	217	56	146	131	243	158		1829
	10	315	216	21	212	103	133	125	320	31	179	367	148	652	364		59	39	120	4	39	284	73	904	48	27	29	59	15	126	52		69	40	0	104	159	7	19	309	797	193	146	145	172	247	200		1661
	11	377	400	17	312	159	219	86	332	69	155	253	158	230	274		113	11	120	5	54	220	103	790	20	21	26	31	6	129	7		65	33	2	166	156	8	18	315	921	137	134	111	240	369	202		1463
	3	315	428	28	271	83	150	48	317	28	200	194	251	535	315		94	59	185	3	77	154	116	697	3	32	43	39	5	93	14		141	5	1	77	91	3	59	252	694	122	14	144	70	485	117		1374
	7	341	442	43	198	95	184	35	307	341	91	232	208	542	391		16	83	223	5	38	125	176	672	12	29	0	51	13	58	12		58	40	0	87	94	7	60	319	677	77	40	171	150	716	127		1598
	27	343	610	163	230	85	163	66	297	461	133	336	223	699	290		15	96	377	2	23	76	182	557	3	47	0	71	1	30	6		23	27	14	75	65	1	31	399	759	189	68	159	60	736	226		1736
	1	253	475	136	132	76	207	130	267	390	49	401	158	769	134		20	52	235	8	53	131	269	404	0	62	4	100	5	9	1		22	6	1	58	34	7	18	320	855	80	48	88	31	639	237		1928
	0	172	692	151	129	112	240	70	218	276	260	404	138	724	170		22	50	110	0	39	151	316	374	4	84	4	99	14	45	1		5	44	7	150	21	9	11	252	773	134	17	86	114	652	270		1933
	3	394	585	99	102	198	269	5	154	185	219	490	216	532	198		8	45	180	2	33	152	491	327	5	18	0	146	15	38	0		16	16	4	147	2	2	2	145	619	120	18	56	96	511	313		1735
	5	380	629	186	73	66	317	9	74	177	25	577	207	370	157		3	35	188	0	23	69	523	509	0	51	0	136	0	20	0		22	52	4	152	2	0	0	156	523	104	16	11	73	441	211		1596
	17	504	767	74	166	167	343	67	63	298	29	532	266	530	54		18	49	331	0	33	44	508	472	5	7	2	100	4	6	0		13	31	0	208	41	2	4	141	406	25	7	8	179	556	148		1519
	52	348	804	35	117	68	215	163	33	172	73	392	391	594	123		28	100	162	0	77	48	436	533	0	1	12	30	6	5	0		2	20	0	136	6	0	1	112	339	125	8	30	114	526	108		1363
	40	487	375	122	171	24	222	73	8	68	37	473	548	419	91		67	126	73	4	10	15	266	523	0	2	5	26	3	13	0		3	23	0	152	0	1	0	184	400	111	24	24	7	604	93		1287
	99	509	425	146	60	39	484	51	27	54	175	354	606	331	18		56	169	64	0	11	56	341	434	1	3	25	9	5	8	0		7	5	0	149	11	0	0	129	567	95	0	61	17	746	112		680
	49	480	285	56	210	52	391	77	5	25	210	352	635	217	16		14	192	32	0	18	93	243	287	0	0	5	28	5	15	0		3	2	0	86	1	0	0	90	604	97	0	50	22	742	83		222
	24	464	528	27	215	37	247	41	7	1	187	286	328	150	41		58	111	44	0	5	43	115	173	0	0	5	7	2	2	0		0	8	0	40	0	0	0	51	648	16	3	30	0	592	55		277
	59	651	562	21	197	43	347	4	0	14	119	107	273	282	74		32	70	31	0	19	55	72	202	0	0	12	33	0	6	0		0	12	0	107	0	0	0	21	465	1	0	4	0	420	18		276
	81	740	468	5	208	86	324	40	0	28	88	138	96	321	5		17	157	23	0	0	14	9	274	0	0	17	0	2	8	0		7	6	0	74	0	0	0	9	338	1	0	16	0	364	29		517
	73	285	302	2	126	64	419	34	0	103	72	158	194	349	19		7	162	1	0	0	12	4	426	0	0	0	2	1	8	0		5	0	0	51	0	0	0	12	76	1	0	3	0	365	65		829
	105	791	260	1	195	27	247	107	0	86	25	110	273	233	13		1	129	0	0	0	74	0	312	0	0	0	0	25	1	0		1	0	0	48	0	0	0	3	238	4	0	1	0	266	26		772
	98	735	192	28	127	56	225	104	0	32	22	80	310	21	21		1	123	1	0	0	46	13	199	0	0	0	0	4	1	0		0	0	0	22	0	0	0	0	330	0	0	1	0	266	2		744
	102	711	78	101	26	29	128	0	317	28	72	14	140	180	17		0	29	6	0	0	8	9	293	0	0	0	0	0	0	0		0	1	0	55	0	0	0	0	343	33	0	0	0	219	0		167
	62	776	169	40	3	29	130	46	485	73	18	42	185	185	57		0	14	0	0	0	3	16	148	0	0	0	0	0	0	0		0	0	0	67	0	0	0	0	300	15	0	1	0	142	10		388
	25	738	226	65	68	15	191	32	238	34	0	288	139	235	0		0	3	0	0	0	15	21	102	0	0	0	1	0	0	0		0	2	0	78	0	0	0	1	302	5	0	0	0	85	0		429
	33	476	157	31	164	11	32	11	227	225	2	313	94	139	0		0	4	0	1	0	24	103	181	0	12	0	0	0	0	0		11	0	0	6	0	0	0	0	434	8	0	0	1	171	1		441
	11	401	117	1	104	1	69	45	239	151	4	272	178	71	5		3	0	0	0	0	15	71	163	0	19	0	0	0	0	0		4	3	0	94	0	0	0	0	322	0	0	0	0	326	0		406
	23	253	74	11	10	1	78	3	74	92	0	68	70	1	1		21	0	17	0	0	21	13	103	0	17	0	0	2	0	0		15	5	0	4	0	0	0	5	166	6	0	0	1	298	0		451
	106	266	72	73	23	0	75	35	38	22	0	168	55	62	26		56	9	3	56	1	30	104	270	0	4	0	0	2	0	1		84	60	0	22	0	2	26	58	200	13	0	2	1	196	1		979
	69	395	64	162	445	8	180	107	69	123	5	405	209	121	264		33	15	13	2	46	50	247	478	15	76	0	12	25	0	50		284	205	0	209	12	7	32	56	372	128	0	55	129	375	73		835
	24	317	312	268	1266	28	164	135	206	64	240	603	176	160	288		79	6	60	7	152	22	368	412	48	201	5	3	75	48	82		330	180	10	149	78	19	11	27	593	247	8	40	347	839	91		459
	44	391	246	257	1367	5	161	10	268	23	285	687	213	90	295		135	9	60	21	134	55	377	469	28	213	1	13	116	70	142		204	42	0	167	126	44	18	16	356	300	83	17	241	704	21		476
	59	299	315	79	1294	4	115	31	219	40	300	675	46	217	297		74	1	124	63	81	55	264	438	73	167	3	15	146	79	216		144	76	7	274	84	49	48	16	390	242	117	45	71	626	36		674
	64	379	356	138	843	0	66	55	201	16	395	641	130	272	257		40	0	175	47	80	12	301	459	70	138	7	25	58	97	229		128	102	19	125	61	31	4	16	496	206	54	104	144	590	64		873
	12	177	481	150	602	0	35	83	92	35	412	593	70	480	167		21	0	111	64	70	44	269	260	20	222	48	30	58	87	192		108	88	1	143	55	10	48	4	692	357	52	153	241	560	11		866
	12	46	380	83	297	2	111	12	26	21	243	474	32	565	27		46	0	80	27	96	54	179	390	62	122	32	25	36	116	130		51	75	10	181	35	0	38	20	632	433	104	158	76	648	10		528
	80	217	282	149	296	0	32	20	46	17	204	407	26	514	97		59	1	40	4	69	101	148	366	47	68	38	9	35	104	64		46	92	1	107	4	1	3	11	536	392	89	206	52	504	10		428
	54	108	230	177	370	0	33	12	173	28	94	506	84	656	91		11	0	42	17	24	129	281	283	89	122	14	12	51	42	48		54	82	0	52	0	12	10	3	559	256	112	188	125	239	10		408
	30	79	207	173	257	7	30	61	144	5	194	463	58	727	79		69	0	74	55	54	93	127	353	145	49	15	1	37	23	66		54	127	2	29	5	0	55	6	511	165	79	47	86	409	2		441
	61	74	128	129	157	1	17	103	152	8	159	419	76	726	33		42	0	122	14	138	79	212	437	103	62	19	7	70	34	113		47	157	1	49	14	0	21	15	376	141	80	35	13	111	0		369
	56	101	210	113	251	0	203	23	160	18	169	345	64	667	38		22	0	196	66	145	47	112	485	113	108	4	7	28	22	102		58	145	0	36	20	5	60	19	271	237	50	82	63	236	5		485
	48	90	281	75	275	1	190	3	338	14	171	376	57	394	99		4	0	234	78	160	55	221	532	181	39	0	20	52	9	79		112	257	1	104	3	0	31	0	313	118	14	36	52	457	9		397
	60	162	137	77	335	0	83	0	449	11	239	268	51	524	131		58	0	209	67	253	55	155	677	204	9	1	1	29	0	56		57	304	5	49	8	0	16	6	281	93	11	23	48	742	0		474
	53	189	129	79	246	0	136	0	505	14	237	180	100	524	66		72	0	279	13	175	56	20	489	211	2	0	7	22	25	123		36	389	16	10	0	0	15	4	228	58	22	31	21	682	0		585
	17	316	39	63	349	0	234	61	436	5	181	93	166	439	115		36	0	177	63	131	44	57	408	109	4	0	2	53	34	132		8	186	10	30	0	0	18	0	137	80	34	3	27	587	0		551
	7	394	103	17	474	1	243	139	287	0	216	60	386	436	246		12	0	268	36	103	34	44	146	154	1	0	0	24	11	118		6	269	1	1	0	0	13	2	175	73	0	2	1	628	2		301
	0	379	37	8	430	0	181	1	166	0	242	71	401	544	233		24	0	237	12	91	39	32	84	73	0	0	0	5	43	85		3	333	0	17	0	0	25	0	84	73	0	1	2	512	0		220
	0	400	59	11	291	0	148	40	180	3	349	41	617	543	167		7	0	222	1	19	34	37	244	82	1	0	0	3	5	28		4	186	0	7	0	0	0	0	79	51	5	25	7	498	0		110
	0	138	16	6	124	0	121	21	208	1	334	10	606	394	293		2	0	232	0	36	29	20	293	29	0	0	0	18	1	14		5	205	0	40	0	0	0	0	85	46	3	0	1	520	0		95
	0	322	377	11	192	0	55	57	264	96	235	31	953	366	471		0	0	223	0	107	25	10	230	80	2	0	0	7	0	5		23	157	0	19	0	0	0	0	10	21	0	7	0	631	0		104
	0	287	101	57	278	1	15	63	265	79	190	36	851	274	521		0	0	180	5	163	4	2	226	55	5	0	0	2	0	0		1	109	0	16	0	0	0	0	35	2	0	0	0	336	0		110
	0	352	143	76	266	0	40	4	152	93	211	21	604	279	543		0	0	297	7	58	3	13	253	38	0	0	0	0	0	0		0	234	0	45	0	0	0	0	159	1	0	0	0	520	0		153
	0	257	194	125	294	1	11	71	137	86	328	10	427	408	565		0	0	241	1	43	2	2	197	20	0	0	0	0	0	1		0	190	0	7	0	0	0	0	170	0	0	1	0	694	0		154
	0	10	229	119	156	3	37	4	88	32	352	5	326	480	722		0	0	245	0	4	2	3	70	39	0	0	0	0	0	0		0	16	0	27	0	0	0	0	132	1	0	0	0	550	0		67
	0	113	335	23	101	0	10	37	190	37	333	14	244	530	658		1	0	211	0	18	6	0	33	59	0	0	0	1	0	3		3	87	0	2	0	0	2	0	123	0	0	0	0	484	0		16
	0	239	266	19	93	0	99	2	198	48	236	8	173	336	561		0	0	193	0	16	6	0	80	62	0	0	0	0	0	0		0	59	0	22	0	0	3	0	144	0	0	0	0	514	0		173
	0	225	352	26	234	0	107	35	143	35	195	17	160	280	607		0	0	169	4	36	2	0	74	43	0	0	0	0	0	0		0	17	0	2	0	0	0	0	150	4	0	0	1	492	0		99
	6	97	224	58	247	0	102	18	98	139	288	31	231	292	695		30	0	137	0	14	15	22	96	160	0	0	0	3	0	0		31	6	0	3	0	0	0	2	105	1	0	0	1	438	0		97
	35	138	184	80	53	1	92	38	10	173	147	16	119	201	801		70	4	102	41	16	9	92	130	231	4	0	0	30	0	5		54	27	0	33	0	19	16	11	61	0	0	0	2	337	0		522
	57	44	329	247	310	6	172	226	194	147	124	58	123	115	607		97	24	114	121	44	20	250	95	337	15	0	31	65	2	181		109	196	0	163	0	46	147	39	91	35	0	12	116	465	15		504
	83	193	213	205	429	26	354	251	463	457	246	74	226	165	511		31	14	183	110	42	3	250	47	567	58	34	61	182	83	278		77	93	0	520	5	47	170	38	184	206	11	35	172	962	11		560
	31	123	136	172	520	56	438	153	421	597	404	58	336	132	340		87	9	250	95	21	1	385	175	666	2	48	59	239	108	305		173	246	0	559	0	85	107	68	66	207	149	72	83	783	6		665
	64	142	111	209	521	32	391	135	449	489	317	18	323	197	215		11	22	285	62	17	3	350	272	880	78	94	39	92	171	192		154	367	0	415	45	40	32	54	15	194	246	78	57	412	10		699
	136	159	161	206	351	34	505	159	550	391	346	60	254	211	243		40	22	164	21	34	5	282	338	729	30	102	17	40	104	114		154	329	2	303	58	56	27	51	5	168	261	19	31	375	14		524
	102	87	231	251	408	8	656	124	573	404	191	62	369	124	278		76	11	217	5	88	1	329	381	565	54	44	71	61	65	59		127	143	0	342	38	44	0	39	16	144	196	5	26	277	58		824
	96	380	231	343	309	9	603	149	471	261	177	100	248	82	260		12	27	167	33	48	0	299	425	391	50	7	111	62	67	9		40	165	0	291	95	60	6	1	144	125	120	4	42	127	100		721
	80	461	260	310	156	8	532	62	528	139	192	51	315	156	182		16	14	40	16	42	0	384	391	319	34	5	43	51	84	3		47	329	0	329	94	39	5	25	56	107	63	4	64	312	83		534
	8	314	365	195	169	4	437	118	292	92	94	81	265	184	250		16	4	60	32	34	0	358	199	542	94	24	62	56	139	2		129	466	0	293	153	18	0	10	92	142	103	4	53	435	2		513
	10	313	347	309	248	10	455	60	295	158	94	26	166	309	190		49	15	51	46	18	0	421	137	633	9	8	33	88	186	3		140	448	0	237	194	6	6	12	68	62	142	29	23	46	74		496
	1	354	98	278	304	1	500	123	503	227	174	43	55	376	208		27	35	101	39	2	0	615	69	496	39	6	39	47	163	0		84	386	0	196	176	28	0	2	20	99	163	27	27	79	108		660
	17	370	215	328	327	7	569	258	555	373	92	9	34	274	187		54	37	44	56	4	0	673	195	223	33	19	87	70	136	0		91	438	0	209	129	51	4	1	64	118	156	26	64	89	25		340
	31	210	270	337	153	7	726	290	526	288	36	4	113	360	253		158	44	37	65	4	0	652	258	241	3	3	99	20	55	0		54	377	0	281	99	62	22	5	78	157	94	0	26	122	20		252
	13	579	200	189	247	4	695	381	555	166	31	35	167	259	192		129	42	193	76	0	0	695	244	272	4	0	105	142	70	0		46	406	0	326	71	87	1	26	2	110	247	0	20	377	10		209
	16	668	326	142	239	0	558	291	552	99	80	12	136	315	26		139	84	118	25	18	0	681	139	103	2	0	114	100	51	0		15	479	0	312	41	50	3	20	2	33	107	1	25	858	5		75
	111	793	428	57	324	1	515	66	602	82	152	13	132	387	67		31	33	52	23	0	0	498	107	154	17	0	58	168	70	0		23	260	0	258	61	47	1	10	1	85	14	4	52	810	2		96
	124	762	187	58	292	1	560	177	592	57	111	10	216	286	170		27	8	170	6	0	0	180	125	23	6	0	67	200	58	0		4	308	0	206	44	13	0	1	0	16	10	1	9	904	1		105
	14	760	184	133	234	0	506	141	598	40	46	7	129	289	102		16	4	118	19	0	0	100	74	23	54	0	40	114	27	0		0	299	0	130	32	40	0	0	1	75	2	0	1	699	0		1
	12	591	147	125	280	0	456	52	401	31	2	0	84	257	39		13	8	30	0	0	0	26	80	41	5	0	89	166	28	0		1	188	0	90	6	4	1	0	1	48	0	0	2	566	7		83
	17	364	68	106	363	0	428	39	285	16	11	0	63	242	6		17	24	12	0	0	0	44	101	36	1	0	22	57	21	0		0	167	0	209	0	7	0	0	4	9	0	0	1	495	0		2
	1	305	62	118	203	0	425	39	325	4	4	0	154	179	15		10	30	11	0	0	0	10	82	18	0	0	88	0	43	0		0	125	0	253	0	27	0	0	11	2	0	0	0	431	0		14
	0	269	110	175	166	11	403	90	402	0	1	0	200	83	20		1	4	0	4	0	0	54	87	2	1	0	54	28	46	0		0	101	0	274	0	6	0	0	3	3	0	0	1	422	0		21
	0	288	117	233	152	9	340	73	331	1	0	0	231	115	5		8	0	0	0	0	0	39	52	13	2	0	35	18	19	0		0	94	0	208	0	53	0	0	1	0	0	0	1	233	0		9
	0	260	66	84	53	16	176	12	374	0	0	0	227	191	8		6	1	1	3	0	0	41	43	3	0	2	73	0	13	0		1	125	0	179	0	60	0	0	0	0	0	0	0	254	0		3
	0	242	104	119	133	12	130	54	385	0	0	0	162	147	31		1	1	14	0	0	0	97	37	0	1	0	95	4	0	0		0	144	0	264	0	18	0	0	1	0	0	1	0	145	0		7
	0	258	137	90	123	19	113	1	327	0	0	0	72	191	1		4	0	2	0	0	0	84	0	0	0	0	7	8	14	0		0	76	0	329	0	0	0	0	0	0	0	0	1	53	0		0
	0	271	260	113	74	20	161	43	473	0	0	0	88	266	34		7	0	0	0	0	0	66	0	0	0	0	1	0	13	0		0	156	0	253	0	5	0	0	1	0	0	0	0	95	0		2
	0	189	460	116	115	23	146	0	459	1	0	0	128	219	21		2	0	0	0	0	0	30	30	0	0	0	1	4	29	0		0	155	0	193	0	0	0	0	0	0	0	0	1	36	0		0
	2	290	310	136	91	12	174	2	253	0	0	0	205	116	24		16	8	0	0	0	0	56	80	0	0	0	5	0	61	0		28	137	0	179	0	0	0	0	1	5	0	0	0	101	0		38
	15	306	169	318	75	9	159	109	370	2	50	16	177	248	49		27	4	0	37	0	0	204	90	1	3	0	50	1	43	0		36	119	0	174	0	4	12	32	2	26	0	0	1	55	0		458
	154	322	34	262	196	31	314	252	497	139	213	76	67	309	114		24	10	4	69	6	15	551	57	23	11	0	135	16	18	74		45	188	0	371	4	55	28	45	10	211	0	6	91	47	46		666
	169	217	188	121	315	21	197	271	828	121	181	88	250	681	237		39	10	22	42	90	2	554	140	78	30	0	113	185	65	156		68	119	0	344	65	143	84	45	15	149	33	0	213	99	116		808
	102	37	397	355	332	53	231	303	562	7	163	95	256	704	341		20	11	24	35	63	1	848	25	167	118	2	16	200	54	180		181	54	1	486	57	213	123	59	28	90	114	0	156	329	153		467
	26	94	698	184	281	60	331	189	312	40	156	158	338	672	277		15	25	45	96	43	0	896	25	300	113	1	24	155	30	159		87	67	11	393	40	170	40	46	5	146	124	0	52	154	141		334
	47	141	518	235	355	83	518	167	246	127	106	95	354	603	332		11	1	31	58	56	0	736	145	194	84	35	43	169	31	126		90	52	14	429	51	100	40	27	17	217	124	0	52	130	64		361
	54	261	494	279	388	96	694	193	360	151	160	51	210	452	672		11	3	158	19	29	2	1010	181	110	85	50	69	96	51	104		83	162	19	445	0	47	46	47	38	91	84	4	105	169	31		509
	80	295	514	390	369	44	549	280	217	92	178	83	182	481	706		4	1	121	3	10	2	1147	45	90	83	12	27	79	27	79		52	294	2	454	28	97	27	20	43	192	42	1	31	331	34		854
	125	209	464	414	527	40	308	322	92	63	200	35	265	366	676		29	0	141	15	11	0	1166	71	22	108	33	56	67	18	33		53	208	5	454	24	81	15	10	55	84	71	4	22	199	10		623
	71	301	440	219	457	111	217	354	109	14	198	28	227	253	453		126	4	126	25	4	0	977	160	23	90	23	47	52	12	0		9	210	10	518	33	36	15	6	74	109	61	19	29	229	8		695
	24	285	426	139	313	64	324	438	81	7	318	27	367	274	473		105	4	65	20	18	0	1306	182	4	72	21	147	64	21	12		34	299	3	486	62	110	5	4	15	41	49	5	53	480	82		259
	89	204	402	38	331	137	478	373	36	28	425	17	331	263	403		31	26	64	106	32	0	1163	140	24	61	35	163	68	18	44		38	192	12	263	57	72	0	23	4	128	47	16	95	265	106		256
	187	157	363	139	534	133	673	308	38	138	398	57	267	347	228		10	86	73	69	3	0	933	25	20	56	30	89	45	6	78		13	223	8	118	115	95	5	43	5	32	44	22	43	139	89		400
	334	131	372	104	382	195	444	239	53	55	260	58	233	333	264		31	120	64	23	11	3	640	143	14	115	5	65	35	13	122		17	233	2	180	78	84	5	67	7	35	10	28	113	267	25		388
	331	81	344	111	494	65	262	209	369	108	350	103	278	460	120		12	187	16	36	0	11	678	69	0	32	4	19	23	87	116		10	291	1	210	24	32	4	53	0	112	14	17	42	304	13		198
	520	121	413	0	370	149	256	206	636	152	335	115	334	677	56		50	259	19	59	0	54	1255	23	0	31	35	32	74	44	108		2	177	6	230	23	13	0	109	0	71	4	16	35	79	9		210
	362	25	494	13	311	135	357	198	618	201	272	38	208	714	94		63	254	12	28	0	12	1163	64	1	96	38	65	165	35	81		13	60	3	165	6	34	0	43	0	118	3	26	52	34	31		266
	249	66	536	18	543	76	232	228	468	224	161	34	294	659	82		41	1	69	1	0	19	1000	5	0	126	3	28	114	34	43		0	31	2	74	0	99	0	12	1	166	0	6	41	22	18		248
	214	65	671	52	422	172	148	197	538	247	78	10	285	480	94		0	197	34	2	1	23	720	1	0	81	2	18	74	6	16		2	31	2	202	0	48	0	1	0	129	0	13	31	80	0		226
	81	45	549	31	216	153	106	148	352	205	145	2	420	278	65		1	21	30	0	0	8	462	0	0	81	6	6	12	5	1		3	1	7	127	0	7	0	2	0	80	0	0	13	85	0		244
	45	68	307	1	314	112	92	153	373	173	167	0	312	266	34		0	16	34	0	0	0	264	0	0	51	2	21	9	20	1		4	0	0	31	0	2	0	3	0	93	0	0	27	63	0		187
	52	78	200	12	267	49	58	151	253	87	68	1	88	196	18		0	24	0	0	0	2	269	0	0	84	3	9	10	117	1		1	0	0	99	0	0	0	1	0	114	0	1	3	63	0		54
	107	122	197	39	215	15	9	161	37	159	31	0	91	136	6		1	2	21	0	0	1	206	0	0	113	0	2	58	126	2		1	0	0	87	0	20	0	3	0	61	0	1	8	38	0		8
	103	115	308	189	65	78	0	167	0	170	4	0	57	139	1		0	0	15	0	0	8	169	0	0	126	1	0	51	81	0		7	4	0	46	0	37	0	1	0	23	0	0	10	12	0		110
	65	110	260	146	232	99	5	277	6	202	0	0	51	174	0		0	17	13	0	0	3	90	0	0	113	0	0	27	10	0		3	0	0	43	0	69	0	0	0	8	0	0	0	0	0		83
	123	28	261	18	33	6	93	194	1	210	1	0	319	169	0		0	2	6	0	0	21	123	0	0	63	0	1	9	11	0		1	0	0	70	0	60	0	0	0	6	0	0	2	23	0		113
	31	37	264	10	49	81	23	144	4	248	1	0	291	88	0		0	0	13	0	0	5	81	0	0	46	0	0	3	20	0		1	0	0	28	0	3	0	0	0	0	0	0	1	20	0		2
	7	3	268	18	35	58	21	81	4	319	3	0	454	78	0		0	0	0	0	0	6	56	0	0	17	0	0	7	24	0		0	2	0	65	0	0	0	0	0	1	0	0	0	29	0		120
	17	105	364	185	13	42	19	55	1	284	0	0	269	35	0		0	0	92	0	0	2	156	0	0	21	0	0	0	18	0		0	1	0	37	0	0	0	0	0	0	0	0	0	2	0		5
	0	107	696	232	12	89	55	88	0	178	0	0	286	85	0		11	0	218	0	0	2	127	11	0	22	0	0	0	0	0		3	0	0	38	0	0	0	1	0	3	0	0	0	17	0		0
	25	111	706	257	65	22	17	118	0	210	0	1	214	109	1		48	11	164	46	0	0	216	277	0	29	0	1	8	11	9		174	31	0	88	0	0	4	26	1	32	0	2	1	19	12		129
	35	153	324	308	395	63	129	143	110	285	0	58	145	101	121		41	148	210	92	4	20	281	602	33	77	0	25	82	8	188		309	3	1	333	14	4	19	15	19	23	0	23	93	51	74		273
	51	149	536	238	587	46	64	135	526	386	40	142	178	243	348		32	104	257	58	16	9	282	629	41	117	25	80	50	80	246		227	12	8	358	68	1	1	16	13	129	8	63	178	379	116		210
	54	140	628	151	806	12	11	184	730	516	56	130	269	215	327		30	30	360	6	40	3	680	444	56	87	42	51	38	71	221		135	5	0	129	18	9	21	78	21	249	79	71	111	493	146		363
	29	97	432	301	656	58	18	193	751	544	1	217	225	233	196		62	189	307	32	21	5	642	372	126	81	31	31	55	68	162		79	86	0	103	61	23	39	95	38	129	252	55	46	141	130		163
	12	123	457	264	641	28	3	126	629	562	29	74	409	241	142		61	176	219	26	20	0	282	225	118	150	11	9	35	15	109		65	109	1	98	219	32	6	47	0	66	196	5	30	75	91		444
	0	118	461	143	595	150	25	75	567	527	47	66	478	263	266		6	59	242	4	31	0	268	206	165	187	27	0	17	14	123		78	15	0	243	349	77	51	73	21	76	92	41	113	82	27		440
	30	180	632	260	588	147	20	103	538	620	1	45	311	254	371		6	112	170	56	69	0	135	205	189	134	39	6	91	20	85		89	35	0	169	451	159	65	167	0	104	27	30	79	213	68		455
	35	120	491	100	568	131	32	33	430	642	2	8	564	158	368		7	8	117	125	54	0	183	244	62	76	0	0	189	9	70		133	27	0	297	289	113	1	146	0	102	49	19	32	140	14		190
	23	116	766	137	781	64	35	26	243	696	20	28	711	278	336		15	7	163	97	59	0	163	320	14	61	17	2	213	0	21		160	22	0	193	78	54	56	149	1	72	32	16	10	97	35		212
	9	47	654	88	769	0	3	38	346	835	38	2	880	276	286		59	54	156	97	62	0	101	261	23	67	2	4	74	20	3		100	33	0	38	232	85	3	74	0	76	122	2	120	198	19		194
	93	11	759	73	849	1	4	24	412	648	66	2	1152	240	173		35	0	110	70	61	12	236	264	56	100	1	44	106	4	7		148	12	0	98	231	145	47	42	0	79	218	0	157	89	7		216
	89	36	672	121	741	38	9	16	388	644	63	0	471	42	206		9	0	157	19	44	0	189	220	55	31	0	42	201	6	26		132	0	0	19	272	145	7	59	0	94	133	1	164	160	0		235
	20	52	378	114	578	0	1	40	446	718	61	5	706	94	135		10	0	216	30	72	0	114	172	2	5	0	12	107	0	12		57	7	0	23	120	107	36	76	0	65	136	0	91	112	12		161
	65	64	553	240	638	56	1	19	505	764	39	7	290	89	62		19	0	253	21	105	0	169	100	20	17	0	0	80	0	4		34	5	0	42	179	100	20	70	0	14	110	1	113	121	8		69
	105	17	727	295	620	3	0	7	563	1118	103	2	555	123	71		37	5	192	24	52	0	139	152	26	45	0	5	97	0	0		22	16	0	15	90	58	35	34	0	9	46	0	124	106	1		141
	13	0	742	100	583	11	0	5	447	1093	42	8	203	126	27		23	0	124	13	12	0	72	104	6	0	0	47	65	0	1		15	6	0	1	77	43	12	30	0	2	108	2	78	1	8		249
	65	37	712	102	543	16	0	9	423	1058	73	3	386	207	7		42	0	173	33	9	0	15	206	14	9	0	16	86	2	0		6	6	0	12	88	39	1	19	0	9	27	2	41	5	0		104
	102	4	750	25	431	6	3	0	492	694	164	0	498	236	16		10	0	38	13	0	0	26	192	10	0	0	27	111	2	0		0	0	0	28	69	27	0	2	0	2	25	1	0	1	25		1
	1	0	664	28	611	0	7	0	463	482	144	0	467	114	18		9	1	21	20	8	0	4	103	0	0	0	25	67	0	0		0	0	0	21	15	11	2	8	0	3	61	0	1	0	44		7
	15	5	511	74	588	0	4	0	805	682	133	0	530	149	21		2	0	30	20	47	0	14	135	0	0	0	0	14	0	0		1	0	0	0	5	2	0	2	0	0	33	0	5	51	0		18
	63	1	531	96	441	0	1	0	445	811	120	0	528	247	26		1	0	25	0	39	0	19	82	0	0	0	14	32	0	0		3	1	0	0	4	1	0	1	0	0	54	0	0	8	0		84
	25	25	743	59	521	0	0	0	201	702	57	0	522	267	5		0	0	10	0	1	0	11	17	0	0	0	6	5	1	0		1	0	0	19	0	6	0	0	0	0	12	0	2	0	0		21
	90	2	626	139	411	0	0	0	212	570	11	0	367	312	7		0	0	3	6	0	0	25	35	0	0	0	0	0	0	0		0	0	0	19	0	3	0	0	0	0	7	0	2	0	2		135
	42	10	417	22	522	0	0	0	158	558	0	0	454	283	5		0	0	0	0	0	0	5	23	0	0	0	4	1	0	0		0	0	0	18	0	0	0	0	0	0	7	0	0	0	1		17
	37	6	549	93	475	6	1	62	36	700	2	0	520	202	1		0	0	1	0	1	0	10	61	0	0	0	0	2	0	0		1	0	0	2	0	0	0	1	0	0	12	0	0	0	0		3
	46	0	320	100	220	2	0	182	65	966	7	0	522	180	0		0	0	4	0	1	0	31	82	0	0	0	0	3	0	0		0	0	0	20	0	1	0	0	0	0	0	0	0	0	0		57
	27	11	231	199	458	44	0	108	8	724	27	0	695	113	2		7	0	17	0	0	0	59	35	0	0	0	0	4	0	0		0	0	0	1	0	10	0	3	0	0	0	0	0	0	0		49
	41	4	240	282	412	12	146	31	2	997	12	0	680	183	1		204	0	24	0	0	0	30	97	0	0	0	0	1	0	0		240	30	0	0	0	3	0	123	0	0	4	0	0	30	0		648
	365	14	299	179	444	36	314	150	0	784	17	78	430	153	60		1525	0	0	320	0	57	1268	376	0	0	0	89	1	0	78		1514	2255	0	100	0	10	913	511	0	0	3	61	1	109	271		3670
	550	17	341	334	1464	4	575	508	1093	1069	78	1140	883	141	2020		930	0	5	635	0	444	1819	482	920	26	0	1318	0	0	1437		1171	3382	0	1078	1200	434	1697	466	0	426	0	745	0	148	2042		3202
	1528	69	200	326	2374	171	1247	343	1485	1156	31	918	1659	194	2215		1360	0	4	203	3	227	1700	98	984	561	0	1171	5	13	1464		854	3328	0	1392	1577	482	1663	347	0	1986	299	697	1905	172	2697		1878
	1768	514	183	745	2480	213	2343	165	872	1437	125	1389	1882	358	2281		1328	755	1	315	452	183	1903	444	1033	561	0	720	537	344	1445		1334	2720	389	960	1221	437	1465	651	18	1966	1674	568	3450	1336	2718		2912
	2193	368	526	1141	1291	669	2256	181	1172	1409	701	1336	1958	684	2337		1179	1376	22	400	640	59	2269	643	658	554	0	1661	559	482	964		1586	4085	411	1471	1302	316	2340	815	1376	1797	1616	1052	3673	924	1737		2033
	1407	446	607	879	964	685	1821	593	1377	2128	834	1561	1565	1407	2923		1662	1627	197	980	1131	472	2368	924	795	245	0	1896	1413	404	1799		1789	4187	631	1578	1792	428	2837	711	1885	1386	1954	1020	2518	1064	2278		1521
	1091	1352	577	781	747	1084	1466	950	2183	2011	1278	2289	1053	1157	1502		2170	775	1358	1140	957	245	1495	736	1449	489	201	1022	1141	540	2891		1878	3909	544	1000	1862	368	2367	558	1803	1220	1462	1150	3910	1626	2863		1523
	1171	1924	905	726	705	748	1450	1236	2784	1773	1101	1842	960	1192	816		1652	1971	1484	1059	1044	523	841	641	2382	405	523	541	1653	257	2631		1908	2076	536	1897	1242	283	1274	657	2161	1506	1439	746	4502	1560	3450		1362
	1008	1173	1599	1674	939	433	970	1112	3175	1159	1042	1522	987	814	1460		1703	2358	1516	1136	1200	687	816	820	2092	565	519	698	1213	136	1457		2244	485	573	1537	1479	254	2083	1088	2348	1566	1270	909	3151	1752	3830		1598
	1270	455	1974	1839	724	389	694	771	3145	1031	861	1019	1127	663	1429		1822	1729	1235	1364	1603	741	1099	800	2134	494	1515	512	966	299	544		1991	509	957	1352	1966	337	1763	848	2132	1843	1596	714	1956	1896	3120		1932
	1985	944	2241	1755	641	235	1007	585	2504	597	1134	663	1042	729	2803		1884	1120	1075	1748	1760	503	1322	746	1956	1193	3342	402	1668	259	880		1606	669	1226	952	1821	374	1483	593	1408	1788	1208	803	1435	1597	1613		1834
	2965	1603	2040	1870	620	80	762	459	2484	1318	2129	282	947	646	3146		2173	503	1290	1628	1935	367	1052	673	2659	1264	3924	348	1695	558	1653		1203	2393	1006	1164	1302	278	1180	536	1283	1047	754	888	1612	1420	1225		1481
	3072	1386	1636	1958	703	125	999	408	2198	1083	2551	272	1262	709	3132		1719	353	911	1109	2389	410	980	766	3244	1192	4707	526	3677	782	1478		1657	954	832	1008	1548	318	1279	675	968	639	935	939	1612	1202	1243		832
	3044	1072	1669	1421	2092	124	1221	389	1916	1349	2162	422	1232	1694	2580		1144	469	1267	928	2505	278	1055	885	2606	1205	3617	420	3700	869	1662		1130	1444	859	937	1775	210	937	897	734	690	826	1082	1443	2343	1662		1020
	2267	886	1371	1300	2158	182	965	585	2474	1200	1888	500	1280	1964	2366		1047	667	2160	994	2566	160	1255	806	3412	968	2748	493	5510	852	1879		755	1299	1038	1292	1635	160	993	862	1096	729	839	1121	1459	2551	2001		845
	1288	1060	1083	1276	1823	154	1070	771	2224	1994	1801	821	2687	1592	1877		810	373	2471	617	1684	226	1893	739	2211	1171	1725	396	7870	1104	2143		718	1220	832	836	1397	236	1606	750	670	1116	978	896	1016	2291	2349		877
	768	1335	1029	1064	1111	242	1343	984	1621	2071	1982	474	2606	1072	1923		585	628	2848	545	1158	110	2662	604	1516	1422	829	342	7457	1198	1963		881	1924	520	914	1315	132	1460	540	512	1149	754	820	931	1287	2215		571
	1373	1059	1157	1911	1144	217	1859	927	879	1613	2875	194	2401	1662	1890		433	685	3195	502	1324	118	3253	711	1795	1467	368	321	7854	1770	2798		691	1734	336	448	995	82	1576	665	517	1147	953	584	838	1001	2735		609
	1700	1104	896	1989	1296	326	2909	901	919	1396	2534	156	1271	1812	3049		519	458	3176	499	1212	74	2602	1151	2356	1382	443	455	9020	1790	5025		948	1219	588	556	1035	142	1720	696	1223	1224	1195	481	613	1391	2381		902
	1958	2157	857	3727	1544	402	3290	707	1001	1369	754	181	811	1776	3942		373	475	3228	641	1219	43	2621	895	2458	1174	453	510	6872	1717	3919		1108	704	929	590	962	100	1885	679	2885	1770	1653	836	744	1672	1135		1617
	2739	2848	731	3183	1518	347	3286	1341	916	851	1085	748	1485	2085	3428		538	498	2699	786	2185	156	2737	906	1884	930	701	579	4648	2287	2469		1651	1029	2526	1342	1120	133	2088	685	3085	1027	2830	462	1848	1230	1274		2381
	2193	2113	765	2693	1326	308	3347	2316	676	502	1433	1398	1586	1756	2729		1194	400	3339	536	2037	118	2254	990	1640	706	852	551	4680	1849	1542		1541	437	3000	1268	1065	124	2706	820	2327	663	3515	469	1944	1239	485		2959
	815	1517	1224	2616	1515	1018	1978	1961	474	307	1243	1673	2702	1269	1103		1588	467	3204	767	1927	179	2211	864	1196	573	1030	663	3117	1896	1608		2065	1226	2187	1285	1317	246	3598	1095	1880	1187	2891	280	2957	589	374		2154
	762	2108	2028	2294	2556	1186	1174	1505	442	163	998	1861	2674	1008	2630		1638	429	2322	942	1906	279	1940	912	2322	451	1201	590	1032	1181	2162		2485	867	2031	1205	1308	207	3529	1040	1607	1294	2913	346	3046	445	517		2008
	1183	1531	1748	1796	2954	731	827	1485	403	208	920	1254	2500	1512	3051		2005	415	1831	1029	1994	180	995	1029	2309	760	2028	602	908	700	2466		2332	510	1557	1083	701	423	3241	1958	1265	2234	2785	498	826	327	910		1861
	1382	732	2287	663	3667	872	1073	1258	430	142	784	542	1049	884	1870		2385	582	1365	1046	2256	364	1015	1542	2633	457	2404	475	1740	850	2696		1870	314	1840	1127	885	747	2676	2393	1157	2091	2455	401	1123	395	1418		1595
	1884	573	3694	476	3711	600	665	1024	703	283	1740	988	2362	757	1148		2572	610	1130	1184	2306	411	1021	2581	3269	217	2133	690	1953	954	2032		1439	311	1398	916	1517	605	1745	2391	692	2702	2164	587	2241	298	1724		1266
	2266	1010	4048	783	3023	366	652	1233	1551	722	1619	1467	4665	885	1493		2349	649	760	1265	1867	467	1352	2714	4274	108	2188	633	1725	1482	1475		1117	951	1057	910	1616	426	1212	2788	1030	2563	1398	709	3247	352	3235		2329
	2316	2961	3709	1367	2871	316	1551	1815	3095	783	1808	1475	4896	964	2086		1966	1702	905	1075	1571	799	2158	2417	2625	232	1828	420	1220	1464	739		1350	982	958	916	2326	461	1863	2453	687	1796	1728	730	3007	303	3377		2051
	3216	3186	2650	1358	2812	249	2179	2211	3200	723	1633	1855	4366	764	2082		2095	1832	967	1065	1315	762	1113	2120	1657	357	1650	328	787	1172	690		1765	1028	719	665	3545	628	1422	2006	784	1736	1340	891	1392	302	3920		1857
	3759	2786	2633	722	3636	550	1931	2104	2886	934	2207	1699	4159	810	2861		1683	1640	1051	854	897	776	1440	1438	2067	401	1274	739	810	832	830		1598	1113	698	537	3584	551	1044	981	927	1309	978	862	1105	470	4548		1820
	2897	3669	2794	578	3325	418	1723	1487	3662	1740	2686	1215	3141	895	2264		1171	1085	1175	654	1192	700	682	1377	1844	882	905	786	575	1171	718		1488	1075	1501	526	3375	446	1339	888	1319	1225	686	977	1241	911	5044		1703
	2725	2916	2196	480	2836	287	1055	626	3634	1740	3119	531	1579	988	1627		900	710	1058	492	937	492	964	796	1503	771	737	894	697	570	959		1578	788	2136	560	2652	317	1020	537	1387	1318	458	1375	1596	1662	3837		1775
	2711	1496	1704	595	1312	151	2069	1442	2988	1748	2303	389	537	887	992		813	467	856	437	794	503	1551	605	1143	617	646	818	708	938	780		1479	633	2317	507	1773	371	1254	528	1411	1607	453	1906	2019	1696	1482		1646
	2551	380	1593	599	976	258	2140	2329	2048	1734	2025	378	638	736	1016		642	534	378	533	682	995	1072	672	1005	627	585	528	623	1033	398		1054	576	2609	703	1447	291	1050	407	1549	1143	460	1527	2232	1381	878		1399
	2393	341	1118	416	982	239	1371	2100	1087	1293	1715	487	654	743	916		803	494	390	399	556	1184	963	801	653	539	342	514	646	667	441		850	583	1819	423	1199	350	800	466	1469	1085	536	1381	2374	673	1303		1295
	2390	254	1235	298	836	267	1679	1646	1152	1812	1224	437	556	461	704		816	567	370	430	482	718	1134	694	544	719	218	426	585	736	393		744	659	1505	332	1019	313	642	547	1395	733	455	1454	1417	820	1185		1435
	2219	261	751	398	1094	340	2130	967	1282	2126	805	388	346	436	537		826	491	203	441	328	1011	852	657	675	782	281	329	489	724	312		807	470	1417	185	904	249	807	384	1527	609	503	1734	775	1330	1037		919
	2145	377	852	425	994	338	1346	734	1180	1919	599	562	406	440	508		810	498	195	505	157	1196	1196	699	687	819	333	494	401	665	214		1043	481	1019	279	772	179	547	214	1468	553	499	1731	702	1652	1213		338
	1906	399	741	329	718	281	1051	608	1016	1955	872	541	512	395	699		798	421	185	354	226	850	1263	431	752	802	496	475	617	599	608		819	330	974	356	815	37	604	308	1711	731	433	1131	807	1935	1390		563
	1983	359	607	346	1010	220	941	811	697	1839	814	481	619	324	716		892	473	55	482	128	230	1174	471	757	725	500	608	827	437	997		985	272	1116	351	777	32	761	195	1382	575	207	976	913	1769	1232		730
	1389	226	495	352	731	88	496	860	618	1620	767	370	667	341	640		913	533	182	304	159	651	1008	226	935	885	436	638	1166	467	1010		981	195	1492	366	773	76	675	302	1461	421	210	1190	837	271	1190		531
	1399	208	476	347	777	82	413	1180	791	1953	804	402	487	239	472		788	577	184	454	114	764	920	121	1097	767	514	468	1123	510	1163		1130	254	1759	211	607	114	569	250	1227	105	259	1183	801	229	1648		583
	1632	213	581	310	676	32	598	1184	750	2314	747	408	179	228	270		756	411	322	263	21	462	819	158	971	725	596	439	1136	488	1044		819	207	2121	164	709	62	478	161	1325	292	263	1415	730	113	1520		336
	1536	232	629	129	508	58	668	868	496	1912	519	409	263	259	468		492	246	333	279	112	133	743	211	1056	652	583	433	1353	438	1091		718	241	2241	198	950	54	406	186	1392	390	215	1464	924	88	1160		158
	1305	198	341	294	411	100	682	771	407	2064	548	408	287	217	554		631	359	415	328	249	129	859	34	919	714	208	434	1844	441	1110		776	317	1801	183	952	61	398	173	1261	371	389	1215	912	33	742		249
	1332	180	82	268	374	97	851	550	365	1799	367	204	284	201	634		249	299	404	315	147	76	576	138	904	684	194	432	2215	453	920		636	357	1971	99	1270	78	272	156	1120	270	552	1347	1068	36	499		380
	1282	275	211	227	199	53	943	513	364	1791	442	175	302	205	295		305	339	274	469	128	276	534	103	887	659	301	402	2031	548	1170		394	298	1405	37	799	86	204	171	1208	279	499	1044	835	111	876		590
	1036	472	158	301	285	62	879	468	443	1514	248	170	340	185	282		253	317	264	464	192	235	177	38	867	718	315	453	2169	517	1097		227	212	1163	66	830	90	276	276	1261	271	592	1123	688	165	945		424
	951	437	164	265	170	13	673	380	552	811	244	123	272	93	187		94	153	231	407	274	215	88	33	937	684	264	360	2178	489	773		214	212	1215	221	944	63	299	209	1245	383	462	1178	669	190	1144		181
	804	374	121	318	168	50	701	461	793	1366	217	100	319	161	131		185	286	84	421	281	178	100	217	915	571	122	306	1914	534	483		194	188	1379	359	679	88	104	138	1063	444	275	461	575	182	871		202
	352	335	676	176	111	53	643	316	652	1299	272	123	250	89	173		90	343	66	278	206	166	161	228	765	544	170	285	2015	460	847		370	67	1334	308	297	109	82	166	903	415	486	563	377	111	719		473
	486	451	900	118	49	19	631	239	905	853	180	53	266	24	195		224	219	58	157	171	144	271	303	551	622	215	269	1749	492	760		509	12	1218	181	246	96	253	214	830	357	660	281	711	63	887		704
	548	501	1166	140	24	45	623	162	524	1123	51	163	230	38	121		152	448	48	232	191	116	238	269	461	509	229	268	2162	378	604		323	19	1117	92	428	57	252	214	820	400	463	638	824	92	1012		507
	453	623	1062	129	21	79	320	79	833	918	125	120	149	57	130		207	501	57	338	77	163	187	224	591	278	58	199	2567	313	635		293	32	1183	133	519	169	28	141	816	505	320	781	889	88	852		260
	333	553	766	137	9	38	308	121	429	517	230	191	276	68	85		521	591	104	334	72	162	151	221	539	168	112	163	2305	365	742		241	9	1101	118	466	54	115	102	775	786	197	493	1083	154	485		173
	416	529	628	25	8	41	169	40	455	1095	137	238	182	58	47		522	558	70	282	77	89	53	184	567	103	99	115	1782	287	605		167	25	1061	43	414	5	196	60	686	787	183	522	1018	258	616		240
	533	568	695	27	5	3	175	74	433	817	119	186	69	32	57		365	375	81	419	13	93	46	134	442	178	80	139	1830	349	532		245	21	857	88	328	18	191	69	623	664	263	727	1193	202	748		199
	269	463	717	16	0	5	30	70	415	435	83	171	36	61	67		333	269	26	304	7	40	29	254	577	170	128	132	1931	276	195		280	1	632	61	435	10	95	47	525	557	254	468	1150	155	1002		144
	429	469	642	2	0	38	8	56	492	666	48	154	123	74	97		210	192	25	180	21	13	35	216	444	152	192	93	2075	366	539		130	1	453	76	329	17	187	86	415	532	153	662	1555	213	910		79
	571	413	1016	0	0	6	2	121	248	476	63	77	200	141	73		144	285	63	142	34	23	52	274	486	294	140	49	1684	218	568		153	13	660	151	371	88	141	202	437	365	87	737	1511	258	668		142
	643	422	855	25	2	5	9	162	168	284	82	50	184	171	68		62	234	33	152	33	9	72	118	492	154	103	63	1487	204	431		226	29	609	223	309	65	117	249	470	194	184	640	1355	242	364		167
	308	465	523	60	1	12	2	115	365	345	13	19	181	186	70		105	383	60	156	96	92	61	263	307	124	56	49	1374	196	431		192	23	368	257	390	9	88	245	657	199	190	421	1238	233	445		86
	439	178	127	40	13	15	3	226	269	346	64	33	115	257	32		66	318	22	99	151	178	69	304	371	175	25	53	1198	211	420		34	60	238	211	494	29	88	102	745	102	218	581	956	155	518		51
	490	81	92	106	5	27	23	60	354	346	7	32	42	192	52		166	169	4	63	116	26	4	134	87	201	15	65	1146	193	110		38	55	165	93	228	10	43	167	768	168	42	486	673	201	807		130
	287	116	33	94	26	3	42	209	535	334	2	0	139	259	51		110	212	9	91	140	11	35	113	102	244	37	126	817	240	163		87	23	578	3	242	16	42	201	501	206	102	673	840	248	561		76
	251	91	67	128	32	1	0	100	268	483	4	5	36	112	57		107	196	6	106	34	5	29	135	53	300	27	108	940	161	239		51	30	591	51	220	4	9	170	495	327	143	959	774	158	538		48
	416	155	154	137	59	13	0	49	204	271	9	0	101	100	73		29	119	0	84	123	23	0	229	90	299	35	170	831	168	221		86	42	475	84	141	1	65	101	699	316	181	997	785	218	329		74
	72	148	61	68	107	12	6	182	253	322	2	0	104	110	58		28	181	0	43	80	0	0	209	274	257	47	151	797	230	229		25	11	220	104	74	9	13	67	738	320	97	515	771	281	185		87
	2	33	5	71	23	3	8	91	173	729	23	0	21	58	64		85	216	0	15	36	5	0	169	362	287	114	168	824	141	262		109	22	340	100	67	10	1	73	572	254	127	241	1009	274	131		132
	163	101	20	44	31	6	11	109	221	663	2	0	104	65	55		42	319	5	24	10	10	0	108	505	285	57	49	614	305	370		15	24	283	217	35	90	0	28	411	275	53	660	738	247	93		156
	161	80	18	20	60	0	6	137	253	339	0	1	74	31	21		50	177	5	76	1	0	0	235	756	161	24	62	244	41	309		50	15	228	240	101	53	5	67	141	290	115	775	532	124	132		232
	204	34	89	12	51	5	6	143	271	253	1	0	8	104	45		122	165	1	74	0	2	12	269	795	139	25	64	330	88	609		0	23	502	134	153	15	0	103	212	394	168	843	509	119	37		90
	405	94	131	32	36	10	0	126	225	311	5	2	17	159	29		6	145	7	87	10	7	1	207	678	121	33	65	409	112	603		4	47	569	89	84	117	6	102	431	310	174	795	512	166	74		183
	289	115	279	61	72	6	2	141	192	485	8	0	15	99	54		81	166	0	197	2	2	3	219	570	131	27	30	402	101	442		9	51	488	146	86	164	0	44	571	214	152	551	338	121	19		183
	211	62	408	37	53	1	1	26	309	516	4	12	16	127	47		7	55	0	191	17	4	0	118	697	92	18	60	351	131	279		2	25	465	115	139	62	0	59	587	239	193	200	582	82	91		216
	330	92	437	2	37	4	0	143	257	428	0	162	36	51	58		2	150	0	129	24	3	0	199	567	139	15	67	510	156	271		10	61	657	75	39	308	4	106	490	112	293	531	677	100	134		123
	296	42	203	23	11	1	0	76	160	245	1	154	4	78	64		2	103	0	43	3	6	4	59	315	72	12	57	305	164	235		5	17	572	40	19	266	20	150	244	214	252	634	695	158	140		42
	129	23	489	23	3	3	5	88	151	120	2	128	38	131	78		9	31	0	60	3	1	0	152	294	74	16	56	253	214	152		2	6	502	49	106	183	92	125	493	152	124	515	564	90	108		199
	116	3	632	10	16	1	1	98	124	43	23	94	109	162	41		5	20	6	72	10	6	0	171	269	149	8	63	291	179	381		0	11	511	135	31	200	86	94	347	191	154	288	402	77	52		116
	133	12	724	6	6	1	0	116	77	164	71	111	164	140	18		24	46	5	11	0	5	0	180	275	206	11	45	396	179	420		5	16	399	78	18	170	64	53	102	250	154	66	701	90	56		147
	49	13	751	3	33	1	0	109	30	65	110	120	222	218	1		6	58	6	10	0	10	9	62	363	113	12	61	562	123	170		33	7	410	5	42	137	7	33	340	129	153	243	833	18	17		66
	84	1	968	93	9	1	7	121	81	135	99	139	211	222	15		25	66	28	18	1	16	6	23	342	47	7	34	338	177	338		4	23	367	74	5	166	22	87	474	154	199	273	981	62	6		25
	47	30	901	48	32	0	1	69	86	83	45	132	226	213	87		8	145	69	56	0	23	5	69	318	21	21	21	338	97	73		8	22	384	48	19	123	40	83	354	58	160	217	715	70	67		77
	95	33	842	25	3	1	2	93	150	2	77	160	273	254	113		22	69	24	28	0	3	1	112	238	39	12	19	380	54	265		4	9	382	0	0	148	18	34	208	47	125	99	626	46	63		44
	130	12	886	15	0	2	0	21	134	25	78	312	237	248	78		35	13	17	74	0	5	0	5	271	67	1	40	494	84	168		9	1	339	4	1	184	25	159	501	109	164	17	512	98	54		29
	107	13	899	24	0	6	0	34	26	98	13	281	109	182	234		64	11	7	35	0	3	1	115	287	36	1	28	316	31	121		5	7	421	158	5	129	80	130	249	125	208	1	318	61	31		89
	41	0	736	22	0	0	11	13	66	250	59	184	129	150	255		13	36	0	40	0	26	0	51	186	54	1	42	256	84	317		7	0	300	141	6	184	65	129	583	94	233	10	194	84	59		42
	54	0	443	19	0	1	0	14	74	250	2	284	37	158	210		95	58	24	20	0	23	0	13	258	39	3	46	139	64	225		6	0	234	85	0	231	29	162	493	33	275	0	378	45	74		243
	30	0	420	26	0	0	22	16	68	26	2	309	129	297	90		87	3	14	29	0	19	0	19	298	1	11	17	417	4	269		6	0	336	46	1	207	14	187	392	41	220	3	294	40	4		25
	11	1	125	120	2	3	1	19	107	12	34	169	55	281	93		212	62	4	0	0	17	28	68	228	13	44	39	647	73	339		4	0	342	57	0	134	4	130	513	6	202	1	317	11	36		25
	62	2	337	172	0	9	0	1	42	19	22	140	32	189	128		213	7	8	25	0	9	0	15	172	22	70	63	706	77	134		46	0	115	34	0	105	5	166	353	7	158	11	515	17	113		164
	23	0	271	112	4	10	10	67	102	24	0	247	58	186	220		76	10	24	13	1	14	5	8	66	48	102	22	853	10	131		2	0	320	122	0	171	2	155	212	2	192	1	628	1	23		57
	0	0	225	152	4	0	1	14	171	44	14	235	47	144	171		15	14	6	0	0	27	0	25	164	9	77	8	895	11	207		4	0	278	96	1	131	0	113	343	12	169	0	354	3	50		7
	6	2	194	165	0	1	0	40	281	41	10	148	101	98	285		45	2	0	1	0	0	0	41	59	65	58	48	744	38	98		44	0	216	70	0	168	9	90	347	1	140	0	433	0	109		2
	0	0	230	179	0	0	2	12	137	2	0	76	101	183	311		98	13	46	0	0	40	4	70	86	134	89	51	438	18	162		69	0	134	145	1	170	3	81	463	0	193	1	529	0	74		28
	9	2	349	195	0	3	14	0	121	2	5	91	24	202	191		100	31	57	1	0	23	0	23	16	50	90	34	77	12	142		54	3	280	107	11	303	1	66	437	1	105	0	556	0	21		8
	0	3	428	179	0	2	9	10	91	8	0	152	81	211	185		247	5	4	0	0	1	0	46	130	19	16	77	301	3	216		152	0	381	25	0	390	13	113	419	7	46	18	579	0	112		7
	4	3	399	307	26	0	2	2	69	8	0	148	41	192	224		283	9	14	0	0	24	2	33	144	24	34	70	298	3	242		207	2	304	2	3	330	32	131	370	0	125	10	524	5	54		4
	39	7	270	352	0	2	1	0	23	4	0	79	199	148	349		153	16	12	0	2	48	2	54	169	12	74	26	338	19	193		168	8	250	23	0	234	10	142	360	4	107	15	575	0	64		103
	0	1	703	279	12	1	1	43	106	12	6	12	287	214	344		112	32	3	22	0	22	0	73	234	5	94	34	123	24	163		24	33	198	1	0	238	13	173	326	0	81	104	504	0	107		8
	1	0	819	102	1	0	0	62	197	43	11	70	290	206	319		154	6	19	2	7	14	0	25	335	49	25	34	489	66	170		110	83	97	39	0	242	6	162	280	5	105	28	234	6	125		57
	7	0	870	137	0	2	0	3	115	55	2	110	391	179	183		146	16	47	2	0	8	0	53	366	47	23	49	449	35	103		80	105	181	23	0	188	10	148	247	0	78	120	456	2	71		449
	27	7	1028	214	3	2	23	76	71	95	33	116	335	256	204		24	4	9	4	0	13	0	164	271	5	23	39	497	61	126		40	91	169	1	0	196	13	141	217	1	180	44	481	0	29		560
	0	17	1110	200	0	0	30	95	17	137	74	203	269	205	337		21	8	61	0	0	20	0	36	134	13	43	35	610	41	158		44	78	131	9	0	334	9	4	251	226	113	233	541	0	66		430
	0	5	1005	222	4	1	109	26	5	43	34	234	229	215	399		12	7	30	0	0	17	0	115	88	22	58	45	362	6	161		50	75	88	0	1	377	0	67	295	507	138	50	379	0	175		346
	7	4	986	198	2	0	173	38	7	44	128	205	153	263	383		26	6	0	0	0	19	0	192	251	5	9	23	144	5	305		55	78	119	0	1	305	0	12	322	380	161	157	501	0	123		24
	23	14	900	182	18	1	155	1	29	59	63	219	192	287	242		23	20	39	0	2	9	2	44	279	32	10	9	480	6	127		26	47	153	10	0	123	0	85	305	223	173	111	391	4	22		226
	1	24	635	46	38	0	157	6	46	31	39	143	341	250	218		33	16	30	0	3	12	4	77	143	11	16	0	438	1	306		49	54	109	0	0	48	21	82	339	178	130	3	203	0	174		246
	0	97	556	150	2	0	177	7	73	83	103	134	97	200	183		3	10	2	21	0	1	0	43	245	6	29	6	598	1	74		10	55	104	0	0	10	35	130	176	147	118	8	247	0	37		438
	13	145	754	164	21	0	172	0	9	267	59	164	218	116	316		7	29	0	0	2	3	7	47	291	3	7	12	796	9	229		7	42	80	0	0	11	56	97	80	324	142	54	216	2	117		865
	21	50	683	278	4	0	149	42	12	248	150	216	183	154	348		2	14	0	40	0	4	0	7	141	0	42	1	715	4	63		3	119	115	0	0	6	24	114	113	338	8	5	423	0	87		884
	0	78	647	324	0	0	49	11	19	337	85	55	300	231	383		6	10	0	20	0	9	0	1	246	7	37	5	477	5	251		4	78	181	0	0	5	22	130	134	196	161	5	311	1	202		807
	4	56	598	300	1	0	37	18	3	484	104	124	332	131	376		56	22	2	7	0	20	1	16	215	20	7	0	669	4	67		1	14	130	0	0	7	38	147	130	225	155	0	141	0	144		498
	11	28	548	221	25	8	58	0	0	559	188	124	220	106	352		169	3	0	44	0	1	0	0	189	20	40	1	773	6	184		0	34	60	3	0	3	29	153	205	171	96	2	230	0	91		51
	10	81	678	169	1	4	29	6	2	611	87	98	313	95	439		4	1	0	115	3	24	0	5	227	0	8	1	758	3	280		2	16	96	7	0	3	9	106	248	284	32	0	399	0	166		260
	26	72	529	139	42	1	79	47	10	529	66	139	298	127	509		41	12	0	159	0	13	0	4	184	7	0	0	701	6	134		2	20	112	0	0	2	12	167	297	400	39	0	207	0	68		296
	111	54	525	158	9	0	56	134	2	601	56	65	142	93	528		77	10	0	82	0	1	0	14	118	0	0	5	332	0	253		10	110	104	0	0	8	42	213	369	333	47	0	115	5	121		195
	89	56	594	210	0	1	2	108	2	643	105	151	136	154	702		67	48	0	39	0	0	0	2	77	12	0	11	251	3	137		2	97	149	3	0	0	57	115	352	215	5	1	158	4	98		190
	204	18	375	258	0	4	0	34	0	407	126	75	153	198	780		134	36	0	25	0	3	0	9	38	2	3	0	246	4	165		17	289	148	2	0	0	107	168	55	156	19	0	35	0	71		125
	101	76	345	322	1	3	5	71	3	649	102	196	167	130	623		420	9	0	165	0	2	0	48	75	0	23	2	302	3	243		0	72	60	17	0	4	110	186	157	198	12	0	83	28	43		149
	72	18	106	214	10	0	24	75	0	758	63	161	235	145	632		615	13	0	177	0	0	0	61	210	4	2	0	638	22	47		2	52	123	1	0	0	136	187	125	146	5	3	221	104	33		296
	271	5	91	215	1	0	0	67	10	765	184	133	253	239	409		524	0	0	33	0	2	0	22	167	1	39	0	516	92	217		2	16	207	0	0	8	135	122	179	119	36	0	87	164	56		250
	294	44	250	116	17	0	2	81	41	663	90	87	144	270	677		248	12	11	32	2	0	1	20	261	18	19	0	291	131	214		2	39	340	0	0	2	154	91	203	219	0	0	32	195	14		94
	100	4	302	159	27	1	0	74	125	778	71	124	132	229	763		199	0	41	26	1	2	0	12	71	17	0	0	43	153	235		12	51	423	1	0	0	165	138	190	278	0	0	72	138	69		250
	403	1	159	141	1	0	15	42	139	903	152	111	96	221	769		115	27	76	118	0	0	0	18	99	46	2	0	219	112	178		1	45	236	0	0	0	78	59	298	292	0	0	45	102	5		326
	321	15	125	189	2	0	0	46	66	666	148	98	178	238	461		87	39	26	228	0	4	0	3	29	49	6	3	276	86	195		1	60	248	2	0	8	26	113	424	158	1	6	85	88	42		210
	477	19	63	237	3	4	13	43	123	456	220	48	358	208	652		65	33	38	167	0	0	1	3	12	5	2	0	68	86	275		1	71	373	0	0	6	3	58	637	10	1	0	38	113	3		266
	330	17	64	140	1	0	0	107	138	739	189	68	78	241	423		134	2	44	61	0	0	0	1	208	12	0	0	184	171	193		1	60	596	2	0	1	0	178	375	140	3	0	25	77	0		213
	140	12	175	49	0	0	0	40	148	795	172	81	139	305	442		87	32	7	38	0	0	0	31	584	39	0	2	135	118	312		46	38	334	0	0	10	12	290	180	192	10	0	23	62	1		101
	392	11	217	61	4	0	0	33	136	859	208	92	123	320	175		171	33	3	38	1	0	3	28	706	7	5	0	110	191	157		22	36	143	1	0	11	14	142	395	223	17	0	33	56	5		208
	246	1	167	145	19	0	0	77	83	734	156	82	67	250	198		104	70	26	74	9	0	0	22	643	40	17	0	40	112	297		150	9	96	4	0	4	0	46	382	310	41	0	54	24	0		220
	195	6	212	115	32	0	0	89	133	783	165	89	110	236	222		144	143	19	82	0	0	0	31	557	56	5	0	103	77	44		166	10	154	0	5	0	4	40	358	419	36	0	61	83	2		83
	387	9	182	144	67	6	0	56	78	609	141	120	196	225	202		193	145	21	136	2	0	0	32	465	89	65	0	46	92	200		28	32	194	3	0	0	0	17	290	355	21	0	90	28	11		157
	539	3	224	83	109	0	0	78	24	555	89	193	19	291	165		164	71	39	38	0	0	0	28	351	56	117	1	104	55	195		26	0	235	1	2	3	0	78	168	342	14	0	179	21	0		176
	345	1	304	225	35	0	0	93	39	460	166	233	81	283	262		128	146	23	132	1	0	0	75	406	28	40	6	115	54	258		33	21	190	0	13	13	0	102	243	204	10	0	155	16	25		48
	87	0	183	107	62	1	0	72	90	359	153	141	10	186	309		228	16	6	118	0	0	0	67	382	41	21	0	195	112	454		15	148	52	0	6	3	0	76	253	250	3	0	142	3	1		22
	82	1	110	38	38	0	0	139	78	179	191	119	1	211	329		104	163	9	24	0	0	0	36	353	20	16	0	365	55	561		23	124	103	0	0	5	0	21	216	81	4	0	193	15	35		77
	149	2	37	33	29	0	0	97	42	178	146	80	78	130	270		141	112	6	38	0	5	13	10	273	8	0	3	361	62	733		13	109	135	0	4	2	0	18	171	76	3	0	267	29	3		1
	489	1	4	25	53	0	0	109	156	253	135	32	160	107	458		313	49	0	118	0	19	26	94	354	1	41	0	360	95	648		37	90	194	13	0	0	1	36	292	23	4	0	204	80	24		55
	292	5	14	1	34	0	0	106	89	260	187	120	49	172	213		257	128	14	114	0	0	11	16	315	3	72	1	407	109	740		37	25	114	7	0	0	3	10	344	225	0	1	142	70	2		4
	245	0	30	41	41	0	0	129	97	172	164	92	81	173	213		137	130	53	47	2	10	132	81	252	13	46	0	455	87	594		158	3	127	1	8	0	0	3	259	430	1	0	108	38	47		3
	285	0	29	54	29	0	3	97	33	160	177	16	164	111	94		180	67	36	72	1	0	132	46	293	17	28	0	687	45	397		58	8	106	5	26	0	1	4	86	565	0	0	90	22	0		31
	652	0	24	18	98	0	0	82	8	227	126	15	144	73	137		335	103	0	77	0	5	85	35	227	22	22	1	617	63	311		89	0	84	0	27	0	0	9	118	760	2	0	74	85	0		6
	646	0	44	52	104	0	1	89	2	115	91	40	326	117	139		244	53	22	74	2	0	83	10	152	20	23	5	535	22	98		15	0	21	9	7	0	0	4	217	823	2	0	71	75	4		14
	494	0	45	71	57	0	0	116	21	65	242	77	298	354	51		261	9	0	59	0	0	31	64	164	31	86	0	413	17	261		8	0	116	2	0	0	0	3	198	795	0	0	6	53	0		6
	546	2	2	14	51	0	0	73	82	293	263	80	198	282	118		172	85	0	67	0	16	10	74	119	1	50	2	345	5	174		18	0	57	4	6	0	0	15	169	577	0	0	14	56	10		26
	609	3	5	119	12	0	0	110	2	144	209	116	314	153	143		166	141	0	14	1	25	76	50	290	1	3	4	266	20	507		6	4	99	1	0	0	0	24	193	723	0	0	99	77	6		23
	1034	6	11	32	21	0	0	103	103	196	222	53	412	132	55		184	104	13	13	1	0	4	98	210	4	10	0	325	34	662		19	1	106	45	16	0	33	10	114	794	0	0	51	66	6		55
	873	4	3	14	84	0	20	52	11	70	187	98	526	180	100		177	99	0	11	3	39	63	25	200	19	47	0	764	13	906		0	0	147	91	0	0	32	12	214	794	0	0	3	92	67		32
	552	0	1	30	129	0	40	83	5	75	152	63	343	28	87		352	161	1	13	0	11	8	26	211	15	24	0	575	21	998		6	0	196	89	7	0	12	13	145	823	0	0	61	76	0		5
	932	1	0	46	162	1	35	23	38	56	132	71	396	78	83		364	77	12	8	42	0	34	73	366	0	132	0	384	20	728		47	2	132	50	12	3	24	1	220	745	1	30	55	53	42		0
	786	0	0	91	62	0	52	64	2	208	247	81	344	131	13		306	25	28	5	51	26	13	95	377	0	87	0	280	0	417		39	0	173	147	3	0	2	9	306	603	0	0	31	64	0		63
	447	0	28	96	72	0	45	76	7	295	252	77	274	53	2		307	28	6	4	7	24	51	138	532	2	52	4	380	13	587		51	0	169	194	2	0	12	6	310	464	4	2	134	82	29		15
	851	0	58	124	105	0	79	21	0	264	220	122	148	68	67		316	70	9	0	54	9	0	75	713	0	75	0	301	2	408		30	0	99	125	1	0	27	7	197	393	2	1	368	72	8		13
	826	0	9	188	38	0	87	52	4	128	277	53	270	128	17		349	113	21	3	52	7	106	136	733	0	29	0	399	6	500		4	0	99	94	12	0	5	1	196	416	5	5	457	62	29		55
	744	0	84	76	56	0	72	130	34	66	121	39	312	46	53		263	34	0	37	47	9	76	160	675	0	100	4	410	2	279		2	0	128	103	7	6	1	8	176	389	0	7	343	43	7		3
	589	0	16	73	101	0	75	30	30	147	122	47	366	102	127		258	46	62	0	75	7	23	131	634	0	136	0	331	0	358		9	0	200	155	2	0	0	5	164	343	0	18	201	16	27		0
	638	1	12	102	94	0	56	33	55	330	186	8	351	68	0		141	39	0	27	52	23	17	32	650	1	48	4	184	0	443		6	4	187	90	8	0	0	1	310	242	3	2	146	36	113		102
	320	5	7	92	101	0	113	26	1	27	162	7	280	75	37		194	35	25	32	94	14	73	115	645	3	3	0	653	1	501		12	1	140	94	2	0	0	11	313	142	4	1	159	53	14		2
	999	0	102	111	1	1	116	23	0	130	254	76	359	169	139		59	3	3	6	102	1	92	47	585	0	110	0	615	1	657		0	3	120	206	100	0	0	1	124	77	0	0	114	42	34		52
	892	6	346	175	69	2	142	25	6	52	38	17	320	167	46		48	92	44	12	14	1	116	4	711	0	68	0	653	8	446		3	1	42	79	39	0	0	2	279	106	1	1	82	11	135		28
	295	2	343	87	29	5	184	94	2	285	166	59	557	49	0		51	33	59	0	57	12	81	107	781	0	64	7	691	62	403		9	0	45	117	3	0	0	3	219	82	0	0	78	23	28		4
	376	1	300	158	44	11	201	27	2	229	73	21	478	94	19		135	18	12	0	47	2	25	55	646	0	85	0	461	102	389		4	0	93	140	5	0	0	8	136	103	1	0	182	33	69		5
	350	13	275	208	6	7	193	25	0	282	137	75	405	92	3		170	86	37	0	86	3	17	75	577	0	1	0	292	106	298		0	0	77	107	0	0	0	9	82	39	0	0	163	55	83		44
	303	114	136	180	7	7	110	0	30	195	177	124	390	56	11		155	130	40	0	84	28	7	85	669	0	69	3	245	122	407		21	0	10	143	0	0	0	4	190	66	0	1	120	20	171		103
	362	112	261	155	6	5	114	0	85	142	146	156	267	128	11		109	96	52	0	79	8	8	36	746	0	0	0	652	135	328		0	0	29	50	1	0	0	22	199	39	2	0	47	29	87		0
	120	40	232	30	9	0	214	10	44	221	109	82	359	106	0		151	51	70	5	152	32	2	120	815	1	22	2	448	85	368		3	0	76	64	2	0	0	18	215	31	0	4	68	25	107		6
	276	22	83	52	39	0	165	102	84	233	114	76	231	64	0		162	18	71	1	276	18	3	78	720	0	68	0	631	75	681		0	0	58	57	0	0	0	17	146	206	0	5	81	11	190		52
	201	25	416	35	72	5	179	31	133	303	116	70	199	101	15		196	20	68	14	122	6	6	49	734	0	21	0	558	60	535		0	0	113	15	0	0	0	7	169	211	0	9	67	6	212		145
	206	13	334	59	16	0	181	0	120	336	53	66	186	143	28		63	22	16	0	48	8	1	18	585	0	8	0	299	14	139		25	0	53	37	0	0	16	8	173	64	5	7	82	19	28		222
	433	70	527	126	43	0	108	40	149	417	30	21	250	88	22		133	33	4	30	44	7	3	158	315	0	1	9	467	14	427		1	0	90	0	0	0	0	21	195	162	0	2	324	11	69		13
	138	5	346	48	43	0	105	84	139	574	69	36	280	113	21		285	48	2	2	24	24	0	26	463	3	0	10	421	27	401		14	1	110	4	11	0	2	6	97	191	0	0	596	45	96		3
	349	12	154	99	16	0	132	24	97	419	36	35	302	76	99		184	13	1	0	44	15	1	58	462	3	2	52	616	13	478		5	0	118	1	21	0	0	36	66	114	0	8	417	62	110		6
	192	41	151	54	3	5	130	97	59	272	255	1	331	80	173		56	48	0	0	65	7	1	203	368	4	1	89	787	49	473		11	0	29	31	34	0	0	15	94	111	2	4	219	55	90		170
	220	47	61	19	0	17	173	4	59	161	263	44	150	53	208		102	0	3	10	41	9	0	135	371	1	1	59	647	72	610		7	0	54	2	67	0	15	0	321	182	0	0	235	103	59		91
	357	80	28	126	1	12	116	0	8	166	202	63	87	31	215		91	19	5	4	7	22	0	143	261	0	0	47	689	45	805		0	0	24	85	6	6	69	1	322	341	1	0	210	139	129		181
	27	66	136	18	15	15	95	46	27	32	246	28	189	1	177		111	1	0	1	1	28	1	26	203	0	0	49	652	21	811		14	0	25	68	31	0	52	8	366	153	0	2	99	96	200		181
	188	3	102	12	47	11	72	93	41	40	256	72	382	19	184		74	0	4	23	4	10	0	48	41	0	3	30	429	23	483		3	0	12	7	2	4	5	5	438	146	0	3	536	119	262		180
	122	51	68	54	9	2	141	28	0	66	175	121	326	35	81		157	0	0	15	33	5	0	98	19	1	0	46	529	23	527		30	0	11	0	13	6	25	0	266	241	0	1	291	45	296		186
	297	53	240	45	0	8	143	97	5	149	173	135	147	57	33		109	0	0	18	30	2	0	164	58	0	1	12	268	18	717		45	6	32	4	45	0	48	0	262	292	0	1	390	39	406		35
	361	48	452	122	5	6	109	119	1	193	200	98	90	92	192		57	0	0	4	7	0	0	130	50	1	1	49	283	45	671		86	3	2	10	36	6	32	1	105	406	0	1	255	39	278		183
	453	51	213	136	7	1	154	74	110	182	183	36	85	103	265		17	0	0	0	32	12	0	104	24	0	0	105	496	40	544		71	0	29	1	8	0	15	2	61	357	0	4	92	38	281		277
	444	47	65	45	3	9	122	102	26	123	228	111	153	67	380		50	0	0	0	62	21	0	175	5	2	0	90	301	10	484		113	0	4	67	32	2	49	0	72	307	0	0	112	43	305		131
	348	9	62	112	0	1	182	25	4	195	167	91	126	199	332		43	0	7	0	62	13	0	141	50	0	0	77	407	23	582		97	0	58	77	9	0	18	0	38	363	4	2	150	33	321		184
	133	2	126	33	0	1	182	126	1	321	178	145	57	301	364		74	0	0	3	108	21	0	99	93	0	0	124	412	19	466		52	2	65	1	28	18	24	0	48	324	19	0	361	39	444		15
	118	13	67	43	2	3	107	126	1	406	103	83	32	218	190		41	2	5	7	41	27	0	96	16	0	0	75	428	5	305		84	0	23	84	12	8	2	4	69	200	0	3	503	73	394		28
	202	7	43	26	2	0	146	86	0	228	31	91	42	105	238		10	0	0	7	14	4	0	180	44	0	0	23	418	7	526		94	1	2	66	43	11	17	0	55	242	10	4	221	68	356		50
	509	37	52	24	0	1	117	75	0	231	21	30	79	61	411		37	0	0	52	47	3	0	290	0	0	4	27	511	31	550		56	0	6	14	2	2	0	0	103	331	0	5	266	25	371		56
	120	9	77	82	0	2	64	30	7	173	111	22	87	31	596		18	0	0	59	56	9	1	288	6	1	4	75	532	32	344		24	0	0	136	2	0	25	3	23	282	3	7	214	40	128		6
	397	32	85	101	0	0	70	33	6	154	174	64	219	200	394		20	0	0	0	35	15	10	263	0	0	0	127	546	41	317		91	0	4	61	39	2	21	0	65	234	3	9	358	61	125		227
	340	38	247	57	0	5	41	44	11	195	27	41	248	233	569		27	0	0	52	113	3	0	62	39	0	0	36	315	20	164		91	0	0	129	54	0	24	0	12	184	0	9	404	59	106		398
	855	6	348	112	0	10	90	30	26	397	52	21	200	151	725		29	0	0	48	118	10	12	116	43	0	0	108	443	26	212		21	1	0	98	13	1	74	2	21	254	0	9	398	34	54		236
	516	22	317	98	0	0	73	52	26	326	57	11	237	65	753		29	0	3	50	26	11	5	107	16	1	0	65	445	17	213		51	4	5	81	65	1	59	0	106	270	2	29	443	60	104		257
	710	16	212	105	3	3	28	84	3	271	4	5	222	201	787		85	0	48	60	34	2	0	314	30	0	0	78	143	22	258		19	0	3	69	58	6	34	0	39	239	0	38	87	53	44		299
	757	2	74	53	1	11	3	50	99	63	7	4	102	175	890		22	20	106	40	14	15	0	267	10	1	0	112	451	49	212		38	0	43	103	22	0	28	0	32	252	0	8	77	40	26		107
	607	17	102	52	1	3	36	38	114	21	19	2	185	137	715		34	8	28	30	49	7	0	66	8	5	0	77	1040	26	334		43	0	72	77	5	10	71	0	45	164	0	16	158	52	23		410
	660	14	165	25	0	4	18	43	147	19	28	36	174	50	670		12	75	79	22	4	5	0	182	6	0	0	41	1000	26	516		187	0	45	17	8	0	71	0	26	140	0	3	184	37	43		724
	754	2	199	16	0	4	1	9	182	33	134	132	160	112	526		23	13	39	45	10	11	0	293	28	0	0	85	546	9	439		295	0	46	92	22	0	2	0	0	69	1	20	192	102	41		608
	618	29	239	34	0	20	1	57	62	27	237	205	176	30	491		37	3	83	71	0	24	1	311	26	0	0	54	980	3	607		288	0	17	51	17	0	34	0	3	233	12	1	134	115	86		327
	655	6	295	14	9	7	1	72	67	69	267	270	131	74	393		28	7	71	97	19	4	1	213	7	0	1	125	744	2	589		166	0	11	26	8	1	4	0	36	52	30	8	197	89	82		367
	668	3	377	31	8	6	0	30	95	39	273	229	32	32	371		5	2	72	35	2	2	1	37	172	1	0	77	334	0	347		220	0	6	45	21	0	0	0	210	160	1	9	215	19	54		280
	641	21	162	196	7	22	0	82	49	63	171	115	173	41	309		9	25	35	48	0	1	0	147	218	0	0	98	538	2	217		172	0	4	23	0	0	54	0	153	78	6	1	336	35	87		294
	587	19	204	98	2	19	0	8	28	80	123	118	102	9	575		22	57	21	40	1	2	0	200	467	1	0	116	678	17	179		215	0	41	58	0	1	24	0	108	250	22	3	166	5	126		124
	547	65	188	61	2	0	0	18	28	52	127	129	71	78	897		62	53	41	16	59	2	1	157	632	0	0	8	691	33	187		210	0	70	36	0	0	8	0	11	174	41	0	211	25	91		215
	377	43	222	66	2	18	0	76	37	41	102	147	47	65	830		25	39	21	31	72	1	0	73	738	7	0	26	739	50	251		180	0	85	88	40	1	35	0	46	300	2	0	64	4	44		201
	363	180	218	37	14	15	2	105	34	39	83	183	20	107	602		64	79	71	14	84	1	1	72	734	1	7	57	954	51	307		181	0	102	267	61	9	71	0	27	246	7	0	44	4	71		204
	218	157	216	86	13	31	0	79	14	54	46	161	10	33	617		28	47	82	83	21	20	0	277	685	1	0	83	1199	95	320		290	0	107	299	58	6	99	0	22	166	15	1	87	0	48		281
	149	48	138	77	21	14	0	135	2	83	41	153	181	132	583		3	19	47	71	42	27	0	269	705	1	1	87	1358	88	366		198	1	13	264	58	0	53	0	44	159	17	1	73	1	13		401
	102	98	159	58	26	2	0	24	54	174	190	184	242	165	573		15	52	49	9	118	5	0	68	646	0	0	102	1158	74	402		131	5	6	223	30	1	12	0	38	172	0	0	83	7	44		367
	201	27	305	99	23	2	0	28	67	238	187	138	335	35	598		11	59	70	98	97	17	0	138	514	6	0	140	1111	82	379		141	0	50	245	12	19	30	0	41	140	4	2	36	2	11		747
	385	72	506	139	23	4	0	37	10	167	109	93	300	50	424		51	82	1	12	122	6	0	322	436	1	8	145	912	61	297		138	0	54	187	5	4	36	0	95	130	20	0	60	17	33		679
	279	114	492	82	12	1	0	25	66	175	125	61	276	7	352		10	150	60	15	129	0	0	169	184	0	0	201	871	71	201		127	0	31	104	0	8	11	0	86	192	4	0	66	1	33		379
	161	63	601	78	7	10	0	17	0	149	24	64	265	62	288		20	91	31	65	103	7	0	11	84	0	3	152	1048	106	189		117	0	58	119	0	0	5	0	25	187	3	0	156	13	4		37
	457	46	349	34	60	43	0	7	0	270	115	9	258	79	176		14	65	4	131	65	28	0	14	117	2	2	108	941	47	149		109	0	33	178	14	0	6	0	15	71	6	0	53	2	42		51
	438	44	166	31	51	6	0	0	6	84	97	77	372	122	412		48	97	77	140	18	1	0	193	56	1	6	78	870	35	139		147	0	25	147	0	3	0	0	65	163	0	0	197	2	13		69
	522	51	194	19	21	2	0	15	21	71	140	125	467	271	345		1	4	64	104	12	1	0	193	123	29	29	116	1263	10	217		73	1	70	191	0	1	14	2	82	232	0	0	249	1	6		70
	304	13	363	19	5	7	9	10	31	277	117	93	476	342	401		48	0	3	33	30	8	0	163	68	35	149	117	769	43	151		86	3	74	191	0	0	9	3	10	88	4	0	95	7	35		158
	251	23	216	19	26	5	0	2	63	128	74	160	467	279	581		10	5	0	19	67	7	0	202	118	29	85	75	1111	51	47		13	0	123	131	0	2	25	1	8	118	0	0	124	31	47		268
	198	188	181	40	111	8	0	11	8	161	179	115	425	283	386		4	20	0	53	90	6	0	198	86	73	8	151	1136	89	127		10	8	123	179	0	3	10	0	20	92	2	0	174	100	4		439
	428	302	222	147	84	0	0	7	87	76	152	143	440	246	278		25	44	1	3	71	16	0	159	65	53	15	195	519	100	181		21	2	36	52	0	10	3	0	17	140	0	0	182	60	31		419
	416	346	165	225	46	2	0	0	37	86	85	109	428	330	264		4	64	0	23	56	1	0	64	150	77	6	214	508	6	115		11	0	27	50	0	8	29	0	28	224	0	0	360	50	23		360
	231	319	158	180	100	21	0	10	63	50	156	159	462	341	269		24	106	1	74	35	2	0	39	96	77	48	47	507	4	81		11	1	86	40	0	0	36	0	115	146	0	0	476	97	0		220
	202	205	232	146	21	28	3	7	40	7	191	200	435	418	150		22	69	0	44	10	3	0	17	185	13	39	87	864	3	57		60	11	88	42	0	0	71	0	28	164	0	0	323	144	0		113
	334	119	191	155	27	39	3	0	0	0	93	245	338	449	223		14	65	0	50	15	0	0	19	361	13	31	222	827	10	19		45	0	44	21	0	4	50	0	230	170	0	0	313	165	1		251
	277	87	373	159	24	26	1	2	0	1	181	186	257	368	227		7	80	0	4	6	0	0	28	513	60	33	175	610	80	68		25	0	9	101	0	1	34	0	43	198	0	0	176	105	0		315
	149	35	246	24	25	26	0	0	0	7	206	251	165	411	251		9	94	15	14	22	0	0	18	504	65	6	109	1047	180	78		10	4	23	45	0	13	37	0	23	132	0	0	83	100	7		245
	309	45	330	3	24	22	10	3	30	0	240	326	117	375	176		13	19	83	0	0	0	0	5	340	22	91	206	825	110	69		5	0	13	102	0	25	21	5	112	218	0	0	334	101	4		371
	291	50	486	3	25	26	0	0	7	3	98	242	199	256	331		4	31	54	29	1	0	0	81	148	56	101	221	460	114	0		1	3	20	50	0	58	20	8	169	176	0	0	350	78	9		299
	134	83	571	3	1	32	0	0	24	34	90	249	226	235	282		34	22	34	13	11	0	0	65	131	57	30	233	706	93	76		1	0	34	115	0	120	57	1	17	216	0	0	255	69	5		141
	244	113	456	96	1	26	33	8	28	85	154	114	268	257	144		101	16	9	29	20	0	0	0	200	67	151	180	847	24	72		2	0	20	80	0	93	109	3	161	336	0	1	208	60	4		94
	188	106	436	35	4	14	122	8	3	25	100	648	224	279	186		59	36	8	11	6	0	0	12	230	84	104	158	543	65	36		0	0	25	57	0	76	211	0	69	254	0	0	424	25	3		219
	212	119	277	2	3	22	164	9	25	146	86	968	186	272	39		12	0	35	0	17	1	0	32	425	12	35	303	350	44	16		0	0	3	98	0	48	153	0	84	145	0	25	489	31	2		39
	227	85	258	41	23	34	185	18	1	149	56	794	81	288	99		9	1	25	0	13	0	0	67	357	5	94	176	533	112	4		0	0	20	117	0	5	72	0	107	132	0	16	487	36	0		210
	273	61	569	88	3	33	131	30	0	91	6	381	219	373	287		69	2	59	26	0	0	0	108	363	26	32	195	747	132	64		7	0	1	119	2	22	100	0	114	198	0	4	325	21	2		329
	210	110	243	23	8	24	111	133	0	202	92	164	392	363	167		57	50	32	59	5	0	0	18	308	42	110	177	729	137	10		3	0	0	65	4	35	158	8	81	158	0	6	367	22	21		888
	167	143	369	25	37	8	97	209	10	66	98	56	450	200	84		12	70	2	8	16	0	0	1	268	22	140	260	348	119	12		2	0	0	106	0	36	48	0	168	117	0	21	319	35	1		888
	171	123	245	89	33	22	68	120	39	36	63	38	474	66	125		113	6	5	56	8	0	0	1	431	31	163	189	232	113	47		18	0	0	65	0	12	55	0	170	312	0	2	246	45	1		580
	163	168	326	138	58	13	68	99	93	37	48	36	387	93	129		152	3	0	4	4	0	0	43	446	46	181	231	238	125	4		14	0	6	140	0	16	102	0	86	320	0	10	170	64	3		418
	72	240	480	152	79	30	5	94	119	2	41	17	430	39	159		55	0	0	59	23	0	0	94	520	38	135	131	207	86	1		1	0	1	96	0	9	18	2	20	293	0	13	262	28	8		444
	112	84	438	85	12	11	19	62	97	38	54	23	463	48	122		115	9	2	97	36	0	0	0	474	31	135	66	305	27	22		0	0	0	76	0	5	100	12	58	102	0	30	437	24	5		305
	215	198	299	3	25	40	103	177	0	32	19	12	506	154	285		88	11	0	69	76	1	0	16	440	8	116	33	243	20	62		4	0	12	144	0	7	147	0	64	165	0	20	296	54	1		37
	88	266	232	135	10	2	53	87	81	60	107	32	380	83	358		43	0	0	76	34	0	0	85	472	6	46	31	50	15	85		0	0	17	61	5	26	120	4	52	129	0	12	205	35	3		187
	107	68	311	4	3	4	85	34	29	70	30	25	607	154	157		65	0	0	14	56	0	5	0	233	12	25	41	124	18	97		14	0	14	96	0	30	69	1	80	77	0	19	370	14	0		264
	91	204	341	0	12	6	45	100	10	155	13	68	442	185	303		51	0	0	32	58	0	47	2	413	29	8	50	299	18	109		3	0	11	165	10	27	7	7	24	67	0	21	148	55	0		205
	25	241	580	17	84	1	64	105	52	174	119	118	493	313	255		72	2	0	63	8	1	10	20	352	11	9	54	256	17	97		14	1	6	36	13	11	70	4	24	107	0	11	349	60	0		402
	60	205	309	44	2	9	52	51	102	181	224	109	588	446	233		125	0	0	67	54	0	36	110	453	12	13	60	127	0	49		11	0	6	110	8	3	109	10	110	84	0	5	668	62	0		298
	72	231	449	5	81	32	87	163	38	149	280	107	534	415	204		55	0	0	73	32	0	15	72	409	1	5	49	278	4	100		0	0	20	88	2	9	49	0	49	189	0	26	418	58	2		176
	5	196	290	34	1	29	131	144	62	91	368	86	512	377	101		129	0	1	58	11	0	31	104	446	16	7	67	172	0	140		0	0	5	96	0	4	168	4	30	201	0	14	438	60	1		252
	36	307	543	42	36	16	91	168	101	52	136	137	440	349	158		77	6	0	57	26	7	50	1	312	7	39	37	314	1	127		0	0	0	79	0	6	34	1	12	100	0	2	222	45	0		236
	23	294	492	64	81	15	155	140	59	15	102	64	373	372	193		24	19	0	29	0	0	38	1	308	18	44	67	233	0	66		1	2	0	64	0	3	75	4	45	101	0	12	529	35	7		327
	13	100	396	40	14	65	145	50	88	27	181	79	312	276	235		37	8	0	63	0	40	56	33	412	19	47	104	189	2	128		9	3	2	15	0	3	101	6	26	160	0	0	445	67	3		283
	1	113	433	42	5	72	188	47	116	45	194	143	372	213	257		74	3	0	11	0	59	64	2	236	6	9	128	243	1	103		3	0	0	77	0	8	70	0	41	135	0	8	551	7	5		198
	8	105	165	24	28	14	169	132	55	160	206	101	403	332	285		58	5	0	9	10	20	61	95	187	0	23	75	369	1	98		17	0	0	2	2	13	156	5	85	94	0	0	280	42	4		187
	11	21	316	3	19	37	163	55	135	148	174	102	279	47	267		46	5	0	32	26	21	42	69	238	4	58	22	143	2	73		23	0	1	10	19	6	182	6	139	33	0	0	544	80	1		478
	1	87	500	69	4	27	147	71	20	197	319	107	264	242	232		11	39	0	24	3	53	62	6	99	11	66	28	216	1	57		139	4	1	2	21	12	48	3	106	75	0	0	182	59	0		309
	13	35	595	2	51	2	87	62	49	308	139	197	238	343	205		12	0	1	40	53	109	77	95	205	1	63	31	190	4	61		142	0	7	1	9	3	52	0	51	52	0	0	255	79	0		288
	0	141	484	121	38	24	22	37	94	240	150	186	331	288	233		22	2	0	79	2	22	27	60	273	8	65	0	222	0	87		77	0	2	16	2	3	27	0	93	73	0	0	315	150	0		285
	2	347	366	5	57	6	33	96	135	447	106	207	416	330	446		3	0	0	94	0	2	37	6	179	34	9	15	581	0	38		37	0	6	9	0	20	5	2	41	106	0	0	486	191	7		136
	1	275	308	1	4	14	22	173	23	359	120	150	539	385	912		25	5	0	133	0	84	49	1	452	2	20	31	1312	0	140		121	1	11	37	0	13	11	0	101	136	12	0	497	183	4		52
	1	104	170	0	4	17	34	155	55	25	89	63	646	151	973		38	1	0	46	0	86	27	54	507	7	19	7	1506	1	200		137	0	0	1	0	9	20	0	178	183	6	0	428	155	1		29
	0	152	451	52	102	3	5	198	74	89	60	99	543	151	689		16	29	0	47	0	59	50	9	524	2	13	5	750	3	112		68	7	0	12	0	42	58	0	45	205	0	0	129	135	11		74
	2	213	182	22	99	6	13	94	23	216	26	104	508	242	720		35	49	0	61	0	72	52	178	542	0	35	24	663	38	149		112	0	0	14	0	21	144	0	60	142	1	0	470	127	9		49
	10	54	243	22	5	31	7	64	142	321	27	17	462	323	530		28	17	0	38	0	14	26	120	510	0	14	5	897	61	141		61	0	3	14	0	26	16	0	62	181	1	0	449	116	1		48
	4	241	618	64	30	32	0	124	236	207	88	82	622	322	279		1	229	0	28	5	81	59	44	511	0	2	15	928	68	83		26	1	16	19	0	10	17	0	106	250	9	0	482	86	1		62
	5	157	232	7	43	8	0	157	220	135	50	139	696	342	354		6	349	3	40	0	62	82	0	590	0	16	11	688	53	78		64	0	0	83	0	4	58	0	101	251	4	0	285	84	3		31
	1	106	324	133	53	15	30	231	224	125	33	111	600	329	319		0	333	34	16	0	6	17	4	441	0	47	4	528	38	101		159	0	4	94	0	3	30	0	133	276	0	0	147	68	0		67
	0	109	272	43	124	53	96	56	224	123	21	116	578	258	260		0	268	114	22	0	0	71	0	420	0	4	1	347	35	59		166	0	0	144	0	0	22	1	97	242	2	0	59	64	6		65
	0	218	233	0	72	42	86	112	244	149	34	88	476	227	302		15	191	54	68	0	50	36	30	254	0	7	0	511	14	115		169	0	0	60	0	0	61	0	175	106	7	0	307	109	0		24
	3	151	342	58	80	29	48	33	179	155	189	34	378	262	120		0	105	2	2	57	6	41	0	536	2	40	5	623	25	125		176	0	0	63	0	1	28	0	144	101	9	0	319	78	0		19
	14	148	483	109	48	61	31	99	141	518	98	89	283	255	353		26	218	42	24	45	29	5	111	528	0	34	35	745	17	192		77	0	0	30	0	23	20	0	133	138	0	0	137	45	5		29
	23	130	183	75	3	44	0	124	125	596	196	63	315	221	401		88	151	39	89	4	70	36	244	259	0	12	21	847	17	127		109	0	2	28	0	0	29	0	108	38	12	0	241	56	6		83
	82	132	291	2	46	12	0	111	183	461	207	128	401	193	226		111	181	58	97	49	71	0	238	181	1	22	12	693	41	116		45	0	0	64	0	0	9	2	104	127	2	0	443	90	2		184
	105	107	389	10	131	14	0	87	150	459	182	153	406	204	244		36	29	18	56	27	64	96	132	384	0	1	29	623	39	43		63	0	3	34	0	0	2	0	91	145	0	0	413	19	0		173
	415	91	630	2	36	51	0	88	133	376	67	142	423	137	317		66	13	23	41	37	69	31	70	456	0	6	34	637	2	104		37	0	0	0	0	0	10	0	109	73	0	0	170	16	0		86
	467	113	577	0	40	5	0	150	142	309	59	224	520	84	285		42	128	89	24	63	16	0	69	545	0	10	15	569	27	124		23	0	3	33	0	5	16	0	201	123	0	0	150	11	0		30
	428	144	182	15	1	63	0	144	81	297	120	198	316	51	195		39	331	114	71	72	10	3	56	466	0	15	21	492	16	183		20	0	2	10	0	4	15	0	119	129	0	0	200	20	0		201
	542	149	124	0	29	56	0	112	181	313	6	227	372	259	327		22	200	114	36	27	24	11	125	377	0	0	17	572	8	137		1	0	3	2	0	0	3	0	75	78	4	1	110	28	5		172
	292	47	190	0	45	46	0	103	218	258	10	322	151	148	337		47	215	115	119	45	12	4	81	436	2	0	6	734	43	73		31	0	0	20	0	1	2	0	29	120	2	36	365	18	4		27
	332	43	123	0	0	86	118	95	230	136	3	325	281	228	206		24	88	55	222	67	0	0	107	347	0	20	0	709	61	53		0	2	0	8	0	0	1	0	27	59	12	16	347	9	6		5
	525	11	395	2	0	98	248	42	157	216	47	423	381	279	265		36	201	59	94	81	7	0	33	336	0	0	0	605	33	48		0	0	0	1	0	0	0	0	156	83	1	9	271	5	10		51
	345	23	317	38	19	93	394	183	117	165	323	435	397	170	210		68	76	107	12	65	10	0	28	396	1	22	3	505	21	59		36	0	0	0	0	0	0	0	131	54	0	3	193	19	7		4
	154	54	258	295	16	34	414	171	42	310	346	585	370	172	214		5	16	25	39	94	2	0	40	405	5	1	0	371	35	69		50	0	0	0	0	0	0	1	186	79	0	0	113	3	5		83
	431	6	374	310	0	18	319	190	130	266	342	466	392	230	200		65	149	120	69	25	5	2	10	669	0	0	12	521	24	39		13	0	0	0	0	0	23	2	100	54	0	3	88	8	5		35
	468	30	244	291	2	14	96	115	87	259	288	271	251	76	299		44	171	68	52	58	20	0	37	845	0	0	5	365	71	93		48	1	0	3	0	0	21	0	232	36	0	0	247	40	0		26
	219	7	298	267	17	18	259	131	135	195	301	279	439	239	261		16	69	142	46	36	6	1	37	882	0	0	1	413	84	191		0	0	0	0	0	0	0	0	62	65	0	0	284	40	8		30
	211	2	427	198	31	35	208	150	157	321	177	228	470	124	123		2	68	118	52	37	20	0	60	676	1	0	18	357	63	192		0	0	0	0	0	0	5	0	110	74	0	0	291	71	0		25
	283	1	354	207	125	72	175	52	55	246	145	173	599	32	6		8	99	106	38	40	0	0	62	552	0	7	0	188	58	211		0	1	0	0	0	0	1	0	155	134	0	0	450	90	0		26
	346	5	455	207	75	32	265	69	69	305	208	199	637	43	136		68	254	173	83	62	3	0	82	576	0	28	3	362	51	131		7	0	0	1	0	0	2	0	326	89	0	0	233	55	0		48
	238	0	454	90	0	51	388	14	12	316	198	175	653	93	162		42	311	123	43	50	0	0	63	720	0	7	2	138	4	83		9	1	0	0	0	0	0	1	168	64	0	0	321	71	5		20
	97	13	463	26	36	40	257	3	21	228	162	107	565	30	223		136	389	47	36	60	10	0	108	468	2	3	3	161	9	73		4	1	0	0	0	0	5	0	255	156	0	0	248	75	1		22
	231	10	485	73	34	27	188	150	80	108	213	102	475	4	112		52	324	142	36	108	68	0	151	205	0	0	2	440	3	53		0	5	0	0	0	0	0	1	216	158	0	0	488	50	1		2
	220	33	423	159	16	81	111	234	98	104	103	53	226	32	234		63	155	202	9	22	71	8	115	254	0	1	0	346	10	40		23	1	0	0	0	0	0	0	225	179	0	0	183	39	0		1
	135	5	418	185	83	50	98	121	0	249	84	83	359	117	84		88	58	99	10	124	47	0	38	135	7	11	7	191	27	104		18	1	0	0	0	0	0	0	295	183	0	0	102	22	0		0
	215	13	255	197	41	13	156	121	53	128	161	164	243	91	108		94	61	83	86	84	58	24	53	229	0	5	6	341	5	94		5	0	0	0	0	0	0	0	305	132	0	0	238	37	1		1
	248	1	89	140	56	68	132	25	0	282	116	129	301	25	125		22	96	105	12	68	56	0	87	316	1	0	35	153	21	135		39	0	0	0	0	0	0	0	268	109	0	0	310	25	2		5
	256	1	193	70	50	77	207	41	0	275	221	39	409	1	78		22	71	24	38	59	45	0	109	305	0	0	19	70	46	140		27	0	0	0	0	0	0	1	220	90	0	0	412	9	4		22
	295	21	259	31	4	60	264	125	12	131	214	36	399	0	52		31	2	24	9	128	45	0	26	324	0	0	15	288	39	94		57	0	0	0	0	0	0	0	150	125	0	0	344	9	4		6
[truncated: 104 more columns]

## Sheet: Motion traces_G2
	G2_Trial1																G2_Trial2																G2_Trial3																G2_Trial4
	Mouse 1	Mouse 2	Mouse 3	Mouse 4	Mouse 5	Mouse 6	Mouse 7	Mouse 8	Mouse 9	Mouse 10	Mouse 11	Mouse 12	Mouse 13	Mouse 14	Mouse 15		Mouse 1	Mouse 2	Mouse 3	Mouse 4	Mouse 5	Mouse 6	Mouse 7	Mouse 8	Mouse 9	Mouse 10	Mouse 11	Mouse 12	Mouse 13	Mouse 14	Mouse 15		Mouse 1	Mouse 2	Mouse 3	Mouse 4	Mouse 5	Mouse 6	Mouse 7	Mouse 8	Mouse 9	Mouse 10	Mouse 11	Mouse 12	Mouse 13	Mouse 14	Mouse 15		Mouse 1
	333	4	177	542	152	1303	94	133	149	495							250	27	108	0	106	36	111	247	316	83							0	0	6	2	13	16	0	0	123	29							3
	408	35	144	499	173	1020	95	189	267	479							453	123	40	0	164	108	33	207	158	130							12	0	1	6	53	35	0	0	97	23							12
	183	245	150	369	68	544	104	275	278	127							279	110	56	2	163	190	42	76	311	241							0	0	0	0	78	89	0	0	7	4							10
	343	356	148	241	134	288	83	244	385	108							285	164	12	79	144	228	0	80	245	183							0	0	0	10	122	32	0	0	123	0							80
	232	255	52	159	246	335	22	210	320	98							200	124	27	12	117	250	30	118	255	131							0	0	0	45	97	114	0	0	148	0							127
	329	223	214	167	371	270	15	303	367	114							332	157	78	43	16	329	1	50	335	200							0	0	0	32	50	69	0	0	11	0							251
	272	105	220	197	431	107	24	341	578	134							433	259	273	13	92	250	8	43	294	235							0	0	0	34	68	110	0	0	4	2							149
	435	98	157	249	418	426	20	356	504	130							429	238	278	24	120	242	7	66	244	154							2	0	3	21	139	145	0	0	42	1							161
	663	80	70	380	255	463	1	344	273	74							290	203	427	16	31	220	25	119	282	155							0	0	16	14	163	81	0	0	1	0							86
	563	124	38	501	379	553	28	367	13	46							331	141	371	4	55	268	15	134	232	120							6	0	2	12	134	64	0	0	9	11							69
	873	178	100	462	463	426	29	398	96	79							256	150	423	79	145	287	25	124	160	143							0	0	7	7	148	127	0	0	16	122							77
	718	221	122	575	451	316	76	348	130	0							410	240	467	478	116	206	23	82	217	246							0	0	11	4	292	115	0	0	24	129							16
	712	231	125	568	439	383	24	322	201	1							363	194	627	469	76	239	28	64	297	255							0	0	18	0	257	128	0	0	2	79							3
	779	137	90	812	568	380	0	279	191	0							294	141	331	423	35	353	30	37	491	241							0	0	34	0	211	122	0	0	0	50							207
	578	59	74	888	597	387	0	258	132	10							338	116	234	383	43	424	22	40	441	278							0	0	49	0	254	54	0	0	8	67							84
	279	57	204	921	563	216	2	184	150	50							341	54	199	359	111	349	16	146	311	281							3	0	46	0	210	90	0	0	240	182							4
	591	17	426	937	543	259	0	141	231	59							437	106	99	233	71	486	2	71	274	203							1	0	9	0	93	36	0	0	350	140							1
	643	44	362	744	666	243	2	188	161	59							492	251	52	268	66	505	11	45	450	182							4	0	9	0	25	14	0	0	453	59							0
	617	184	264	677	649	288	0	207	204	12							514	253	122	297	54	511	4	32	288	227							0	0	55	0	12	16	0	0	486	53							0
	494	209	233	880	671	320	1	116	8	25							476	163	44	408	30	582	8	85	220	223							0	0	80	0	70	12	0	0	253	4							0
	616	240	118	842	665	253	1	35	159	40							562	240	12	462	19	564	3	84	367	291							0	0	70	0	41	8	0	0	278	27							0
	337	142	131	599	650	134	3	73	66	80							464	186	88	441	5	543	1	89	289	245							0	0	21	0	127	11	0	0	256	42							1
	161	230	91	933	754	44	0	57	97	141							328	189	136	570	46	458	27	58	252	202							0	0	32	0	155	61	0	0	198	22							0
	346	278	140	887	753	67	13	58	148	30							323	134	93	587	115	384	7	11	235	200							0	30	66	0	156	149	0	0	321	22							0
	188	194	207	815	873	30	24	43	99	37							295	253	70	627	93	420	10	30	207	195							7	112	106	0	10	128	1	0	558	43							0
	246	179	287	835	897	165	75	136	83	61							459	163	84	698	31	358	20	43	210	247							1	80	167	0	4	101	1	0	613	89							0
	373	259	410	737	883	78	131	53	83	55							679	88	73	690	9	322	38	43	300	215							1	56	185	0	88	117	5	0	435	133							0
	487	258	224	777	865	37	197	82	14	65							815	244	111	375	11	337	41	29	377	240							0	67	154	0	64	36	0	0	199	128							0
	400	204	109	935	1002	32	195	29	111	124							618	235	151	396	1	286	37	28	386	213							1	84	123	0	160	43	0	0	83	86							1
	197	208	123	1017	1184	13	239	38	244	10							545	103	105	427	1	221	50	49	144	234							16	143	30	0	134	42	0	0	97	74							2
	183	196	33	743	1139	31	212	77	330	11							616	18	152	419	2	163	104	96	329	248							16	108	84	0	54	69	0	0	98	27							5
	175	180	149	972	833	46	223	16	585	22							490	132	229	345	0	184	146	91	216	309							4	81	70	0	191	143	0	0	125	32							0
	104	193	182	633	888	226	164	7	406	0							389	77	259	156	0	261	172	60	121	337							111	61	144	0	258	73	0	0	146	74							5
	203	218	40	706	1213	287	151	21	434	24							418	133	184	320	0	421	99	51	363	373							173	24	80	0	275	24	0	3	255	79							74
	230	265	47	538	958	388	221	104	400	10							382	86	139	432	0	446	93	44	381	346							184	13	52	0	176	52	0	16	266	54							305
	265	239	185	428	838	336	268	9	477	0							277	192	92	443	0	443	85	34	340	291							310	42	119	0	38	39	0	20	210	31							236
	123	357	367	492	943	119	198	72	573	10							381	131	102	586	9	339	218	62	337	347							286	7	163	0	13	107	0	19	133	64							179
	253	304	401	525	899	95	49	35	553	29							363	36	171	567	41	144	189	25	232	371							118	21	210	0	67	32	0	28	265	43							120
	420	284	624	454	979	190	80	1	507	2							351	39	126	607	40	252	190	8	263	340							209	4	201	0	78	63	0	6	257	34							89
	214	275	694	465	1085	328	96	26	403	11							383	145	172	482	0	241	175	24	427	281							284	4	197	0	50	98	0	26	225	37							83
	341	257	709	291	817	377	208	116	318	7							389	38	142	601	1	169	47	27	113	208							115	21	171	0	4	43	0	35	251	6							36
	100	227	745	125	555	358	268	10	330	8							390	94	116	555	47	86	101	21	125	278							129	64	221	0	20	57	0	11	292	21							12
	424	187	553	285	408	367	277	51	367	5							461	137	84	611	0	91	165	130	86	256							191	38	201	0	38	52	0	3	174	35							52
	38	61	338	195	399	374	247	131	428	1							561	87	57	541	0	245	166	156	256	262							72	31	138	0	22	61	0	7	73	38							29
	35	129	427	104	428	452	174	56	340	1							486	53	129	353	14	281	105	240	308	223							197	81	135	0	30	77	0	1	74	46							36
	334	29	530	516	600	487	166	6	366	7							548	107	98	375	3	110	122	246	22	108							114	67	101	0	50	95	0	0	70	28							15
	508	184	719	816	594	662	345	11	454	6							310	43	123	498	2	150	61	45	129	171							15	42	45	0	29	73	0	16	297	17							68
	771	213	1074	933	473	705	282	20	541	14							204	115	179	437	9	438	26	149	154	95							20	27	53	0	18	102	0	5	384	43							37
	898	228	782	976	267	690	332	9	503	0							259	179	136	412	0	707	59	168	113	82							51	27	27	0	32	36	0	15	260	49							2
	642	195	735	548	377	884	355	4	503	17							216	41	191	396	7	882	96	146	327	51							12	4	7	0	5	161	0	1	331	54							40
	409	243	690	423	478	1041	279	9	394	25							165	112	190	530	6	779	43	160	108	57							10	0	17	0	2	89	0	3	452	52							11
	996	410	600	561	539	1003	231	9	436	26							152	158	160	571	2	892	135	37	45	113							9	0	15	0	82	68	0	5	480	25							8
	1052	451	487	442	516	757	279	36	629	24							201	56	110	538	2	805	5	50	19	131							37	2	10	0	328	97	0	28	599	29							22
	1053	421	524	458	299	808	174	18	650	20							316	98	134	749	0	540	5	14	22	76							28	21	15	0	289	158	0	10	555	36							26
	941	445	625	494	334	980	175	47	530	2							325	96	132	428	0	313	92	11	86	34							47	28	31	0	164	170	0	19	490	51							5
	758	427	706	557	420	1051	136	27	525	29							289	111	224	490	0	196	15	8	92	88							40	5	6	0	137	144	0	4	303	42							13
	733	293	709	615	403	786	86	39	457	50							180	1	118	410	0	262	0	55	2	117							1	0	3	0	84	150	0	0	329	22							26
	702	273	606	386	129	626	40	0	403	0							155	6	232	423	0	96	10	6	26	160							1	1	0	0	35	152	0	0	355	22							4
	539	359	835	320	474	605	58	45	264	52							163	106	240	192	0	121	16	21	10	85							0	0	27	0	44	40	0	0	253	7							5
	615	476	491	310	514	535	177	20	140	41							85	62	227	234	0	48	10	62	215	121							0	1	8	0	15	42	0	2	358	36							0
	784	587	615	86	985	738	179	21	210	44							54	129	247	102	0	81	2	65	39	179							0	0	7	0	24	52	1	16	343	6							0
	928	597	624	55	887	583	197	5	297	28							15	132	166	115	32	127	21	106	184	178							0	0	3	7	19	8	0	2	401	10							0
	1167	491	560	99	477	750	177	10	278	50							22	75	82	247	84	160	0	173	290	146							0	0	23	90	26	17	14	17	312	14							2
	1331	461	419	259	400	825	224	40	209	184							9	129	182	440	1	113	1	260	77	250							3	21	9	146	23	8	0	4	133	23							0
	1416	340	509	261	690	758	212	53	172	198							3	171	158	636	30	125	0	231	86	104							0	0	29	168	21	12	0	0	135	14							0
	1118	346	188	155	808	739	313	69	143	181							1	140	191	775	48	143	0	152	271	254							0	3	9	144	20	30	0	0	139	40							0
	1036	283	66	177	799	535	212	85	95	220							0	96	352	528	38	145	0	109	123	296							0	0	3	139	7	55	2	0	351	32							0
	861	264	458	8	1020	478	290	116	112	141							0	26	327	568	57	64	0	117	150	287							0	0	0	91	2	43	11	1	442	50							79
	733	474	406	42	694	264	327	113	84	237							9	51	285	590	3	106	0	191	199	292							0	0	7	34	2	74	18	1	469	9							325
	626	544	473	18	577	217	414	38	183	272							2	95	313	684	1	123	0	202	215	212							0	0	8	89	0	29	1	8	425	13							412
	791	330	224	5	573	472	233	69	254	226							15	35	162	561	6	245	0	256	273	166							4	0	5	107	0	21	7	10	430	27							342
	484	371	97	8	647	503	50	96	243	233							91	36	110	518	61	202	0	342	252	11							6	0	10	146	0	3	0	16	396	15							346
	617	322	287	3	568	530	234	34	187	301							269	38	195	422	122	175	4	340	278	97							0	0	4	112	2	15	3	5	335	39							335
	475	316	438	0	487	583	330	5	102	227							423	98	226	458	14	138	0	261	273	102							0	0	0	114	0	4	9	12	378	43							350
	411	211	675	0	513	803	242	68	284	165							410	116	211	414	43	135	0	290	341	56							17	0	7	133	0	13	28	25	313	18							248
	657	57	513	0	478	830	308	77	310	81							439	170	227	464	44	156	16	312	355	71							26	0	116	156	0	3	28	29	147	1							306
	552	76	550	380	228	741	159	36	223	199							458	198	61	811	82	173	26	269	243	102							8	0	61	147	0	0	72	24	145	20							280
	367	4	570	428	314	764	88	20	206	303							214	204	235	646	167	185	186	214	383	110							5	0	84	130	0	0	105	43	227	19							262
	442	70	634	493	475	622	134	29	270	337							158	203	257	479	195	232	228	243	301	62							14	0	32	79	0	1	95	13	247	16							273
	174	93	670	480	472	617	147	31	294	546							181	154	294	552	178	130	130	185	168	144							4	0	15	69	0	0	55	1	200	7							134
	559	145	356	606	521	351	94	62	316	582							211	83	184	649	148	112	157	103	128	80							21	0	11	110	0	16	98	7	267	45							54
	140	114	167	547	682	228	143	109	478	499							171	202	110	381	125	108	5	56	119	149							0	0	13	85	0	114	25	3	231	98							84
	418	62	278	600	738	319	362	191	561	307							18	212	184	234	70	134	118	177	193	321							0	0	2	93	0	52	56	3	228	63							176
	199	124	254	715	939	411	443	206	838	286							217	208	160	151	88	160	182	128	351	284							0	0	1	121	0	94	58	1	172	89							213
	337	235	507	766	890	476	302	224	1074	350							133	177	279	72	175	155	288	181	426	173							0	0	25	40	0	23	19	0	219	59							283
	272	256	621	898	861	332	322	146	963	250							121	109	110	130	160	211	323	103	599	248							0	0	7	55	0	6	56	1	176	16							230
	316	244	690	831	829	697	374	113	771	209							241	141	201	297	144	133	309	172	404	343							12	1	3	57	0	15	74	0	145	0							286
	622	135	838	768	815	751	534	15	784	140							211	129	230	130	185	206	435	165	179	254							0	6	0	78	0	52	70	12	154	14							366
	472	220	890	846	631	601	500	51	820	136							204	84	146	250	212	175	410	257	272	200							64	30	2	91	0	71	32	27	200	21							275
	403	36	1149	1005	539	549	492	72	748	289							195	102	152	293	118	149	293	252	233	315							148	42	0	91	0	105	80	18	192	6							129
	409	127	1189	741	561	760	475	71	768	277							85	106	178	497	69	114	220	174	178	332							190	5	0	62	0	83	93	31	124	9							164
	125	210	974	791	568	977	372	53	628	286							95	52	102	626	65	276	236	205	164	351							215	10	0	56	0	76	131	19	226	10							106
	284	87	1106	934	564	849	431	43	383	461							43	37	112	496	28	95	228	244	102	259							251	56	16	50	0	100	46	6	228	8							338
	640	43	1184	801	283	709	126	12	389	585							53	27	238	236	136	112	127	176	138	413							99	1	52	17	0	47	89	0	180	2							430
	1413	87	1150	773	243	1029	172	14	288	710							13	31	214	100	273	91	97	176	148	436							183	54	12	4	0	65	117	8	223	7							473
	1844	31	865	735	158	1084	243	27	343	583							28	87	237	326	334	137	65	247	175	375							302	9	6	49	0	112	134	17	190	6							461
	2505	117	350	711	245	1053	534	57	367	409							49	89	289	505	419	203	93	229	140	272							240	0	1	93	0	145	137	11	210	4							426
	2604	148	566	670	460	980	435	11	430	167							57	91	331	573	495	212	120	167	200	181							222	0	3	163	22	91	109	31	417	2							269
	2240	64	426	888	357	908	367	25	421	166							163	73	141	769	491	296	164	140	131	282							266	0	4	151	7	67	111	10	356	7							131
	1452	37	627	518	488	761	307	12	444	93							227	77	96	1023	295	195	174	176	83	305							261	0	4	139	0	57	82	6	135	1							75
	1026	3	689	828	560	706	295	26	318	52							148	24	137	1166	51	182	197	176	222	304							336	1	0	124	8	52	25	5	175	0							119
	879	9	846	886	311	851	382	43	332	166							185	26	116	744	92	191	276	226	103	154							392	0	0	99	5	21	11	2	233	0							86
	845	186	978	826	398	937	235	30	234	228							98	13	139	486	56	157	207	134	230	187							482	0	44	67	0	27	27	8	446	1							155
	562	180	808	789	481	774	420	31	132	553							240	35	213	340	70	77	103	264	68	298							538	0	22	85	1	177	8	0	388	0							182
	418	49	667	659	529	406	490	31	93	859							235	20	225	551	76	115	191	235	76	245							369	44	48	54	1	141	59	4	187	4							80
	315	144	854	981	241	117	397	13	77	792							266	5	174	615	252	125	221	218	147	252							312	14	4	5	0	55	92	3	138	1							87
	531	132	547	742	270	239	598	5	121	727							252	8	268	542	310	143	187	224	42	188							440	14	3	44	13	94	50	0	257	0							176
	237	252	497	611	278	405	534	22	116	768							162	0	151	433	332	190	141	131	24	197							447	11	9	89	13	10	46	2	108	0							201
	290	93	595	244	225	208	399	48	77	448							92	0	25	297	162	118	184	213	35	50							415	11	0	65	0	44	13	3	198	2							145
	457	26	631	532	293	171	297	15	29	190							138	0	51	328	88	109	149	403	79	132							148	20	0	44	1	30	25	0	223	0							188
	736	237	667	504	249	143	307	11	67	16							85	0	35	164	118	64	119	251	35	177							128	24	4	53	6	26	2	0	92	0							134
	347	77	272	487	545	640	360	48	1	61							97	0	106	210	63	77	215	358	128	110							132	17	57	46	1	70	9	0	154	0							243
	337	80	537	426	740	1001	399	35	60	25							129	40	78	100	169	72	221	247	112	47							178	2	7	9	3	51	20	0	136	0							149
	491	174	507	411	1065	1199	317	29	180	111							92	20	111	124	175	57	247	217	4	190							199	75	11	34	0	62	14	1	128	8							142
	197	292	647	463	1419	1681	185	7	328	174							47	25	32	66	191	33	338	206	31	412							150	20	2	89	2	60	11	1	268	27							89
	82	382	389	623	1377	1339	316	1	456	103							0	18	40	126	194	119	309	157	44	359							155	12	23	125	0	22	22	0	281	24							130
	361	183	97	864	1246	1377	413	4	338	111							3	11	14	152	253	81	334	38	22	317							260	8	10	114	0	10	34	0	170	74							154
	1041	316	363	809	1182	909	351	26	314	55							4	7	5	267	427	84	457	23	35	435							82	0	11	91	63	40	25	0	148	24							115
	1231	155	142	779	727	619	266	39	424	92							3	55	142	249	514	124	338	76	89	510							107	5	0	83	88	71	15	0	116	9							244
	971	253	573	1012	577	308	258	43	581	106							2	52	210	139	351	43	341	166	65	533							270	1	0	57	73	132	22	0	152	5							240
	423	320	1127	722	461	249	184	71	628	119							3	52	252	197	341	75	323	222	238	533							167	0	0	99	13	95	27	0	305	6							93
	811	291	1488	1080	132	127	166	44	530	65							2	12	279	179	434	89	392	301	367	356							222	4	0	57	5	130	30	0	289	19							16
	918	150	1709	1192	346	94	231	83	470	17							3	27	257	139	461	84	369	239	283	165							87	0	59	24	8	96	22	0	231	14							64
	1080	298	1801	1449	171	288	221	61	615	56							74	22	135	121	380	87	263	144	268	56							168	0	15	32	18	80	22	0	239	4							259
	863	243	1592	1191	295	409	199	94	769	45							79	39	226	8	342	42	129	239	503	48							293	0	9	24	14	93	20	0	309	1							419
	1201	75	1195	1132	542	593	313	120	651	51							169	13	311	15	337	103	96	269	407	117							269	0	23	139	0	98	6	0	344	4							89
	1384	235	735	1052	355	567	120	59	607	77							48	7	164	161	263	116	70	323	587	167							256	32	39	94	0	35	1	0	359	0							345
	1071	252	645	1028	559	763	280	110	517	92							95	8	97	220	460	33	61	337	413	277							129	25	28	37	1	51	26	0	155	0							491
	1014	52	475	807	565	763	480	100	593	17							43	18	208	245	595	19	55	246	264	507							276	2	23	5	7	7	33	0	220	0							444
	843	41	89	800	664	384	359	153	476	3							53	12	309	324	720	35	9	160	344	507							297	32	20	106	10	9	79	0	368	0							526
	630	91	256	406	656	431	213	116	402	4							31	35	360	247	742	4	70	138	464	419							295	0	10	157	0	10	53	0	475	8							542
	629	69	351	121	500	433	242	165	428	79							49	73	360	355	682	99	19	180	166	334							192	0	3	130	0	47	28	0	482	11							456
	593	202	666	144	367	432	173	152	402	17							70	78	411	293	725	13	36	232	374	354							288	0	1	71	3	157	42	0	390	21							330
	619	133	908	160	367	262	180	244	191	17							111	79	427	150	662	101	58	208	272	320							131	0	7	91	0	34	13	1	316	0							272
	875	54	938	242	183	120	279	262	142	5							144	86	412	160	518	325	92	136	270	396							189	0	10	123	0	3	19	2	164	7							163
	1029	40	1051	667	64	342	323	282	325	42							86	64	487	189	582	283	82	110	331	384							356	0	15	118	0	0	36	0	233	1							391
	955	149	1109	1244	53	791	201	311	242	77							87	57	543	114	609	206	57	28	511	366							349	0	10	108	0	11	9	23	343	1							301
	1168	14	1163	1727	10	632	16	256	244	52							40	10	503	209	444	270	25	149	563	405							352	0	11	119	0	30	26	44	311	0							290
	833	73	1247	1895	109	343	282	237	142	54							150	86	576	384	551	299	63	203	396	336							503	0	7	101	0	32	2	60	403	0							249
	736	2	1267	1846	52	132	147	276	205	44							79	28	673	252	270	280	40	196	340	260							701	0	1	94	26	53	0	58	631	0							281
	693	0	1171	1006	77	334	173	330	111	29							27	35	763	225	404	268	83	122	256	205							1065	0	1	36	43	34	3	21	443	1							74
	762	13	1262	563	54	390	232	350	154	88							13	82	606	163	336	146	13	70	266	242							776	0	0	35	61	50	17	11	472	0							117
	619	32	1212	399	78	291	119	211	150	68							13	97	501	72	226	115	60	47	334	192							449	0	0	26	30	33	1	1	448	2							82
	565	0	1118	251	186	69	186	173	79	106							4	57	490	61	236	42	57	28	454	337							238	0	0	27	42	8	9	1	221	2							204
	770	6	1003	248	205	101	278	236	197	65							1	20	699	57	170	52	5	64	528	267							324	0	0	32	55	31	0	19	329	0							283
	939	0	1063	107	213	26	191	166	4	64							1	43	932	12	200	184	20	82	824	280							218	0	0	39	36	46	0	26	485	1							248
	652	2	725	170	98	50	238	99	121	29							11	41	924	35	222	325	31	11	830	307							193	0	0	31	45	66	1	87	336	1							282
	656	48	425	14	150	52	297	26	115	16							31	4	719	57	314	258	0	6	695	336							160	0	0	33	56	24	3	105	413	0							221
	704	0	398	72	241	184	85	60	143	19							97	14	508	22	240	234	75	15	670	290							183	0	0	56	55	11	1	78	342	0							94
	480	10	445	144	139	369	179	211	28	113							113	2	702	190	137	230	27	105	422	369							129	0	0	76	74	0	0	21	209	0							289
	273	57	479	300	91	348	357	234	29	195							112	3	946	175	86	135	40	47	313	331							152	0	0	82	83	0	0	68	204	4							372
	552	63	447	380	15	366	327	367	46	39							85	2	1063	182	165	51	18	71	384	251							132	0	0	85	47	0	0	63	376	1							191
	643	220	1128	613	85	202	489	437	30	145							97	9	884	378	179	136	0	135	469	220							101	0	0	39	14	0	0	24	355	0							147
	603	42	1708	689	188	396	466	266	0	160							77	5	844	473	269	179	54	134	309	147							143	0	0	89	2	0	0	57	300	3							66
	478	76	2050	723	123	593	169	258	1	27							107	6	863	431	255	135	38	106	122	136							149	0	0	87	4	0	0	17	75	0							4
	555	80	1925	885	186	682	264	271	16	16							34	13	909	370	221	37	96	15	188	87							231	0	0	121	0	1	0	4	102	3							109
	514	86	1650	596	318	724	246	293	14	24							37	5	696	286	136	118	11	51	240	81							224	0	0	137	22	0	0	43	101	0							154
	199	105	735	539	272	731	126	139	12	2							34	26	719	363	193	146	21	61	154	94							318	0	0	113	106	0	0	22	308	0							261
	206	125	547	581	322	752	168	236	44	8							47	32	665	506	300	108	0	117	106	113							358	0	0	162	127	0	0	10	164	1							356
	264	141	342	532	448	414	163	151	38	0							5	52	619	540	307	151	6	159	239	87							343	0	0	65	123	0	0	23	208	3							402
	312	221	235	216	404	407	113	118	28	71							7	36	731	560	412	154	14	205	172	78							300	0	0	43	140	0	0	67	293	0							132
	201	311	545	240	321	231	119	145	38	22							46	29	823	623	606	84	26	206	351	17							282	0	6	107	182	0	0	30	205	2							219
	140	317	341	338	175	275	159	123	8	22							89	35	650	366	701	70	33	263	371	24							299	0	4	82	193	0	0	46	148	1							85
	244	267	545	393	330	557	37	75	0	31							90	58	632	579	781	69	0	361	199	38							207	0	0	137	194	0	0	70	279	0							114
	306	215	585	308	482	713	106	98	18	0							57	26	649	603	672	65	43	251	179	72							111	0	0	156	201	0	0	17	589	0							252
	410	218	553	113	504	557	149	95	4	42							58	5	552	521	405	21	31	291	43	78							142	0	0	87	239	0	0	71	527	0							189
	458	219	552	118	518	538	64	155	4	59							136	18	625	417	465	14	11	272	191	73							145	0	0	106	199	0	0	40	333	0							25
	447	149	588	401	647	276	126	255	4	48							105	2	732	416	510	31	112	261	292	13							265	0	0	37	71	0	0	42	358	0							279
	371	167	576	146	434	290	97	206	68	88							99	5	647	261	488	22	93	160	239	26							194	0	0	28	71	0	0	78	205	0							482
	230	81	335	133	296	428	25	254	1	81							143	8	593	246	546	25	157	146	207	80							294	0	0	70	21	0	0	22	125	0							123
	268	175	655	82	273	257	102	229	25	7							98	3	553	91	552	50	375	140	518	60							328	0	0	47	44	0	0	10	77	0							18
	410	48	613	228	245	122	53	277	40	52							41	2	551	89	564	42	427	96	280	170							349	0	0	19	72	0	0	49	126	0							64
	562	255	639	197	127	145	35	294	2	21							78	0	657	72	688	129	375	161	517	48							240	0	0	19	75	0	0	78	63	0							82
	460	393	729	196	197	164	108	264	0	13							32	2	811	117	626	138	401	109	236	132							286	0	0	91	13	0	0	43	207	0							138
	503	210	641	206	176	166	285	234	24	0							151	5	1098	209	602	219	245	53	16	72							307	0	0	122	2	0	0	21	148	0							266
	233	207	213	308	279	225	210	222	15	14							207	9	643	292	455	204	159	89	242	86							464	0	0	98	2	0	0	6	195	0							233
	364	291	483	504	314	204	425	137	29	6							374	2	858	315	410	156	327	276	84	70							539	0	0	54	14	0	1	6	97	0							330
	381	187	454	519	249	279	499	79	119	14							562	4	573	328	337	61	338	250	36	106							524	0	0	70	7	0	2	0	207	0							378
	508	201	616	251	311	62	545	118	5	41							693	1	517	409	358	26	132	132	22	145							521	0	0	78	0	0	0	28	269	0							307
	458	206	508	411	389	113	570	89	36	19							623	0	318	422	390	15	309	294	31	138							461	0	0	114	0	0	0	28	178	0							231
	436	328	242	360	420	66	495	21	68	9							622	0	419	296	362	76	272	131	82	81							396	0	0	235	0	0	14	6	126	0							178
	300	564	551	368	374	122	473	12	13	0							205	0	425	347	316	78	222	298	75	42							442	0	0	167	0	18	6	30	225	0							190
	144	611	483	235	180	88	384	42	116	0							139	0	473	350	200	56	124	293	55	15							299	0	0	134	2	78	25	39	60	0							208
	58	435	339	439	94	23	316	31	213	3							87	0	254	246	237	59	148	397	7	85							123	0	0	96	0	83	18	4	2	0							94
	164	305	285	466	311	82	393	24	58	0							151	0	414	380	209	133	13	446	25	72							134	0	0	67	0	53	5	18	175	1							163
	162	194	273	592	54	77	304	18	76	1							120	0	418	350	283	232	39	602	78	77							126	0	0	51	0	10	16	8	337	0							69
	187	226	252	401	216	63	290	31	179	2							135	0	354	186	294	191	50	444	232	138							340	0	0	56	0	5	6	40	210	0							46
	54	283	341	334	282	59	274	59	168	1							116	9	292	257	171	194	53	252	234	153							372	0	0	65	0	12	30	5	283	0							188
	58	188	346	223	396	82	244	74	316	0							152	6	253	348	233	182	22	299	160	83							527	0	0	151	14	2	15	56	106	0							169
	142	203	287	245	371	110	316	112	501	0							250	5	134	419	268	149	9	425	66	124							264	0	0	109	142	27	18	61	117	1							197
	181	49	455	327	234	214	345	84	315	10							419	0	69	208	188	157	18	260	27	176							376	0	0	12	176	113	32	30	281	1							173
	169	60	643	316	584	270	256	201	432	34							484	1	85	107	317	111	66	452	29	139							513	0	0	80	125	133	41	22	234	0							72
	164	63	638	245	689	238	329	75	294	41							640	1	94	86	241	45	119	176	0	85							250	0	0	37	75	97	29	0	69	3							89
	73	204	775	222	639	243	406	76	432	50							870	7	122	172	96	26	101	109	1	76							523	0	0	2	69	63	14	0	104	0							93
	142	207	406	157	439	272	325	59	235	33							914	7	275	207	164	22	81	221	207	88							497	0	0	56	76	44	26	16	97	2							175
	116	382	600	165	560	392	198	36	576	5							925	2	405	171	235	21	66	295	185	38							227	0	0	94	44	47	29	6	83	0							88
	100	450	738	254	374	338	237	56	638	76							578	9	427	165	273	9	40	291	243	99							283	1	0	49	74	42	78	0	269	1							134
	57	470	616	195	351	368	305	27	615	28							369	0	183	223	263	7	93	325	256	216							417	0	0	17	115	24	0	3	216	0							84
	76	406	542	251	470	273	556	94	540	1							402	12	207	265	338	8	71	442	104	138							483	0	0	52	26	61	7	2	179	2							70
	117	348	645	240	304	190	450	84	405	54							289	38	250	251	317	1	109	407	37	41							416	17	54	24	60	92	19	0	89	0							82
	67	320	717	200	440	40	296	141	433	29							230	46	225	178	373	8	39	556	100	53							142	13	17	22	65	47	13	0	113	0							307
	111	221	545	321	234	75	299	202	451	150							200	40	31	143	372	154	125	547	130	81							82	25	2	19	45	11	0	13	182	0							370
	72	177	615	207	342	235	316	276	537	205							145	45	117	315	296	251	71	494	148	101							239	51	2	51	13	3	6	47	311	0							301
	8	280	419	160	404	336	240	187	546	314							87	87	37	275	181	360	111	392	80	82							307	21	18	34	7	7	24	4	164	2							278
	1	232	175	226	307	111	424	70	238	298							117	97	13	326	125	306	136	586	105	73							437	15	62	108	7	16	76	4	281	1							89
	8	122	427	267	312	77	432	91	188	368							16	97	2	414	160	196	387	620	201	97							323	25	70	100	2	11	82	31	176	5							66
	25	88	487	209	270	56	522	127	168	342							16	77	85	220	203	270	464	664	248	18							238	2	64	112	4	1	23	4	131	5							204
	67	236	509	165	192	188	520	143	253	270							0	97	58	257	270	326	133	484	263	26							316	31	86	118	0	0	106	0	307	4							65
	39	273	526	161	86	244	407	138	195	239							0	49	32	127	247	311	193	217	220	36							422	49	73	124	0	1	133	24	464	3							314
	21	408	528	214	139	260	90	191	335	168							4	52	1	173	310	233	314	390	212	84							450	9	21	129	0	0	100	41	504	4							326
	129	324	396	166	284	309	185	129	243	146							1	175	0	159	365	211	296	366	254	27							438	1	5	61	0	1	76	20	310	1							139
	42	320	426	174	180	395	249	98	136	155							1	191	30	123	396	228	396	374	67	267							377	1	68	63	0	0	32	30	335	6							253
	103	305	345	207	217	453	170	105	167	194							0	120	46	144	383	241	478	317	105	79							399	3	84	35	0	0	7	1	316	3							280
	94	368	226	183	242	476	269	116	217	145							0	181	19	45	300	155	470	285	187	107							381	9	43	14	5	0	11	0	370	4							251
	21	433	189	234	173	501	190	148	208	186							0	141	3	45	224	125	426	175	211	121							480	21	95	19	242	0	0	6	305	0							332
	50	478	153	159	143	506	122	100	194	192							0	227	10	34	210	183	422	337	258	145							274	17	133	51	242	0	23	0	311	1							272
	85	506	216	82	70	483	200	146	55	172							280	274	29	61	377	178	520	277	266	109							482	73	107	10	236	0	23	1	275	8							356
	65	539	176	72	109	418	392	121	94	99							198	323	29	164	448	128	526	396	212	53							400	85	39	65	170	0	14	0	317	7							245
	42	438	55	145	130	275	446	173	84	19							229	354	7	157	384	122	310	346	133	123							330	15	81	31	201	0	19	3	251	13							141
	61	481	175	158	148	255	419	133	186	29							160	497	81	184	459	66	313	238	68	59							352	50	114	140	238	0	0	35	357	8							1
	82	570	163	318	19	229	352	176	414	70							250	554	77	192	495	41	277	267	48	93							64	5	138	34	268	0	15	2	318	2							10
	9	639	113	296	79	263	390	145	206	5							108	496	73	175	385	67	338	478	89	93							203	8	174	0	314	0	4	44	238	2							2
	81	651	88	278	179	222	646	140	178	245							69	483	40	56	360	25	303	465	10	122							109	26	139	6	313	0	15	13	66	1							5
	126	438	157	210	143	185	870	152	121	353							72	329	121	108	188	35	233	298	128	165							286	32	158	13	252	0	3	2	87	0							0
	100	371	122	303	98	115	948	132	122	293							24	304	122	79	324	61	127	203	85	43							162	1	108	28	230	2	3	5	209	0							1
	99	377	141	399	58	223	686	90	323	231							17	308	24	48	114	28	136	127	1	70							429	1	170	2	156	5	7	0	106	0							3
	45	426	32	307	70	208	650	120	284	300							19	117	33	52	133	84	108	54	8	76							130	26	198	1	132	70	34	0	43	1							1
	76	432	202	261	209	224	663	144	333	246							51	53	247	53	65	75	107	223	509	284							468	26	292	1	82	83	103	0	0	1							2
	124	416	237	238	326	194	597	79	335	192							221	33	362	35	167	2	49	257	514	199							90	34	255	23	105	173	174	1	12	1							0
	47	387	230	170	177	200	638	84	123	238							181	89	384	58	216	6	76	29	451	174							120	13	310	25	140	131	155	25	433	0							0
	59	393	142	140	179	237	480	67	110	409							89	46	400	25	163	64	165	87	388	298							173	14	323	62	54	123	120	19	659	1							0
	148	401	183	128	151	150	521	36	285	457							88	63	404	165	33	136	224	99	559	193							134	6	218	62	61	86	63	2	453	1							0
	215	465	198	108	126	26	675	50	232	353							10	87	438	171	202	76	38	17	404	201							175	1	222	117	51	95	53	8	449	3							0
	190	417	313	169	102	29	687	49	257	407							11	34	464	172	291	77	32	5	349	167							123	14	202	110	94	135	60	4	488	3							216
	151	396	303	151	111	56	455	47	247	459							192	11	504	236	243	51	109	0	566	152							116	8	210	223	69	123	84	0	436	2							270
	117	377	218	228	37	16	363	152	115	618							278	9	466	188	311	94	207	0	506	116							116	2	243	272	8	126	46	0	525	5							258
	215	345	117	205	23	0	495	202	58	669							136	7	486	174	68	49	370	0	207	105							114	28	237	254	39	89	13	2	623	10							426
	204	304	63	148	37	11	653	194	53	678							66	44	426	115	203	61	561	0	215	107							10	0	296	220	67	90	13	1	625	36							467
	137	348	47	195	35	34	474	161	84	720							109	228	327	79	97	120	583	5	384	75							25	0	423	197	44	42	5	0	586	14							530
	148	346	109	198	2	32	477	124	216	742							73	462	303	165	115	45	647	21	673	126							24	0	352	257	79	19	7	0	425	25							696
	124	321	165	222	7	15	627	158	293	660							78	546	262	69	77	33	725	0	602	145							86	4	300	137	50	87	10	0	360	25							508
	202	197	201	153	55	12	374	204	337	652							40	544	272	121	183	26	716	0	400	221							162	55	114	90	72	45	0	0	547	44							393
	287	276	187	72	66	31	280	200	266	586							52	519	345	63	224	74	732	0	619	256							115	2	215	168	81	65	25	0	345	60							550
	208	127	167	119	27	46	112	172	239	612							19	170	148	188	81	30	668	17	534	208							126	22	164	133	51	161	17	0	128	48							282
	250	237	204	144	28	97	201	156	302	346							13	114	187	140	86	13	447	4	769	244							64	22	363	178	22	155	3	2	302	49							258
	274	228	261	77	6	152	700	135	330	434							0	196	396	130	170	28	300	9	908	246							26	10	376	149	1	148	1	3	316	9							337
	245	104	149	65	59	153	987	170	338	631							13	117	367	183	28	76	203	12	823	268							197	0	362	107	15	177	3	1	483	6							268
	244	304	166	84	29	176	1074	129	323	632							0	56	221	92	157	61	177	112	634	157							457	0	333	64	15	128	7	1	445	1							420
	264	312	220	125	2	253	1238	55	305	679							0	157	122	117	338	181	205	306	609	219							309	0	324	103	30	66	8	0	356	34							383
	154	174	240	37	13	259	1259	57	220	494							0	110	204	79	401	160	97	214	514	163							224	0	298	82	38	134	4	1	325	8							332
	135	33	159	19	312	264	1112	89	163	650							0	264	343	24	385	247	257	286	366	190							356	0	368	11	10	119	0	18	435	7							393
	64	221	116	6	349	237	731	70	189	923							1	226	103	19	393	186	299	333	59	174							419	0	379	14	5	154	5	13	655	22							271
	163	204	163	9	235	322	569	61	150	768							269	104	80	91	363	159	267	144	211	100							480	0	319	9	23	212	10	8	704	0							259
	102	195	98	23	154	311	423	30	28	1066							293	139	118	133	370	139	278	354	98	192							369	0	404	87	39	169	18	14	597	6							219
	54	255	27	3	209	269	338	22	76	1341							100	165	199	178	445	48	241	110	105	211							277	0	456	235	36	127	3	3	460	32							346
	84	121	38	45	162	248	367	80	75	1334							213	208	209	136	564	147	234	203	134	269							235	0	272	360	58	66	0	0	468	4							178
	251	39	1	1	106	215	181	111	30	1196							224	233	108	187	484	250	257	251	176	195							162	0	327	389	32	40	2	0	394	18							267
	300	117	23	0	273	313	164	87	49	934							250	194	83	188	552	288	243	436	124	287							311	0	323	253	20	23	0	0	358	3							337
	291	81	28	36	63	295	78	150	3	917							211	118	45	218	523	343	144	184	6	272							290	0	241	162	7	46	0	8	296	13							297
	194	106	59	73	202	252	141	187	24	1015							222	53	117	175	586	239	221	234	22	261							291	0	169	83	1	44	0	4	253	1							379
	125	58	62	178	117	71	265	181	17	605							257	94	149	220	558	192	261	348	24	244							393	0	130	152	1	7	6	0	202	21							273
	60	40	17	214	133	27	332	131	100	813							225	99	129	242	577	222	146	507	220	204							290	0	217	103	0	3	0	8	156	4							258
	35	43	37	347	196	72	446	135	170	538							190	34	123	256	499	209	345	355	165	211							192	0	298	25	6	8	1	0	161	20							327
	102	128	10	508	170	45	579	136	173	340							295	35	119	219	366	123	362	285	96	251							326	0	222	67	57	28	0	1	167	15							342
	66	92	5	575	208	5	593	135	111	593							96	91	62	187	210	92	134	127	128	201							390	0	77	79	88	53	0	4	233	1							311
	109	182	15	464	13	0	779	172	132	698							297	237	92	272	268	99	80	385	32	76							364	0	106	134	118	13	0	10	191	4							377
	101	268	36	463	271	38	914	158	161	719							253	406	22	192	263	23	142	323	105	258							379	0	165	52	208	25	0	4	220	8							329
	25	148	5	662	137	39	873	274	178	472							192	427	3	221	314	98	222	518	97	228							396	0	237	53	169	19	6	3	277	11							191
	155	180	4	378	51	62	901	305	179	436							234	443	72	242	289	175	165	526	65	149							142	0	316	69	83	95	13	3	206	30							180
	120	115	2	295	126	34	766	395	288	387							242	393	2	234	276	102	116	429	63	211							104	0	212	76	55	77	89	2	205	32							120
	101	60	2	298	189	41	722	248	475	350							24	362	8	262	194	66	141	456	125	177							98	0	138	12	78	42	113	6	175	3							298
	98	244	0	424	374	40	717	223	606	644							49	295	7	135	235	123	76	526	111	236							111	0	249	2	148	71	105	2	134	16							421
	101	243	7	583	244	20	613	216	716	890							78	230	10	202	239	70	26	403	6	308							205	0	380	15	112	65	78	0	182	3							427
	76	82	7	414	220	11	524	206	912	1110							22	102	118	259	92	52	100	423	11	360							155	0	356	3	44	55	27	10	304	7							266
	127	278	11	285	291	21	567	297	833	1420							26	47	538	269	204	77	157	432	72	177							289	0	232	5	24	39	12	7	353	0							148
	204	334	0	318	85	26	382	314	762	1386							109	7	772	253	125	94	214	272	77	159							286	0	117	1	17	39	3	4	409	6							307
	258	55	4	334	18	17	312	323	677	1438							203	5	767	140	169	95	170	274	118	186							423	0	68	8	37	16	22	24	340	8							308
	255	14	5	348	61	47	367	194	666	980							309	36	929	165	139	201	182	212	206	100							449	0	7	9	0	13	12	24	191	4							169
	284	5	15	292	180	20	115	251	906	945							81	53	945	128	245	138	276	234	258	223							199	0	33	2	9	15	23	1	161	30							40
	377	4	23	269	332	72	169	217	933	820							39	29	836	29	387	321	175	265	379	350							239	0	39	16	5	16	65	12	290	12							84
	460	19	0	281	348	16	155	334	947	479							180	63	733	17	608	310	107	325	530	185							200	0	82	0	10	25	89	0	325	16							126
	568	59	2	325	295	10	84	203	961	537							281	88	610	114	616	294	36	204	437	313							273	0	92	0	25	3	31	0	233	26							167
	405	50	50	243	504	4	174	210	1234	650							401	87	503	364	702	213	33	139	499	140							280	0	121	5	62	3	8	1	282	35							458
	241	77	82	90	579	47	172	307	1041	494							610	109	333	455	802	152	98	276	413	303							334	0	104	0	1	56	32	2	378	3							165
	162	12	34	200	528	40	120	225	746	330							514	74	248	368	644	87	194	285	168	264							294	0	83	0	19	143	9	0	225	17							220
	213	19	4	115	392	61	37	277	838	119							492	113	187	302	506	210	255	237	499	249							147	0	147	174	2	155	1	1	191	32							369
	217	95	45	127	451	33	138	262	997	144							426	57	192	321	380	264	343	303	374	189							149	0	90	65	1	193	6	1	282	10							346
	157	39	126	53	623	28	63	288	1095	167							534	33	296	267	329	294	389	342	576	68							340	0	20	173	17	172	4	2	377	42							485
	165	44	123	192	668	24	79	217	800	263							565	6	334	107	283	394	419	314	434	112							161	0	47	144	0	176	5	0	356	3							415
	158	108	73	172	488	71	36	102	863	649							919	10	233	48	181	444	417	310	284	241							365	0	93	186	6	135	3	0	586	8							305
	174	11	29	230	450	74	208	124	870	578							839	22	64	73	121	466	473	451	367	220							271	0	73	240	2	103	0	0	655	2							205
	140	124	58	287	511	86	611	125	1016	597							1073	38	22	110	68	418	540	671	281	106							266	0	38	255	9	197	0	0	628	0							226
	132	127	43	335	235	93	1019	129	1072	340							1065	26	81	118	89	359	468	712	188	135							246	0	25	277	2	203	0	0	442	0							173
	169	46	114	194	173	105	956	99	1031	168							1178	0	122	113	116	173	374	385	369	153							162	0	5	234	0	149	0	0	523	8							241
	74	104	91	196	131	126	758	213	833	289							1178	1	267	130	200	62	304	649	188	199							372	0	12	268	0	139	1	0	577	1							218
	128	70	65	68	360	131	757	135	814	314							1242	1	309	127	164	83	194	604	143	276							576	0	52	262	0	132	0	0	546	2							122
	77	170	95	46	724	201	585	144	635	205							890	0	358	68	159	110	95	211	271	328							524	0	52	282	0	58	0	1	403	3							98
	94	287	210	156	726	220	407	23	661	132							627	74	294	92	204	27	121	336	252	410							320	0	22	258	0	62	0	1	422	0							23
	79	231	344	61	687	167	332	66	392	140							509	234	253	87	203	70	126	155	168	373							331	0	1	112	6	39	0	1	424	3							163
	145	117	395	120	665	220	159	52	250	111							751	131	261	48	199	95	25	67	113	400							198	0	0	95	17	36	0	1	461	0							45
	187	44	419	213	332	208	83	76	441	461							804	119	174	38	204	94	34	164	77	112							84	0	0	104	5	11	0	0	461	12							75
	256	7	357	362	203	222	63	60	531	622							825	103	185	39	161	90	74	374	424	233							24	0	0	141	0	38	0	0	458	13							211
	215	78	331	796	227	128	258	144	261	492							1000	89	298	56	168	50	59	224	332	86							15	0	0	177	0	108	0	0	340	18							317
	179	1	326	887	426	130	309	181	307	499							791	57	302	28	147	30	60	307	429	227							1	0	0	265	3	110	0	0	222	4							148
	186	49	309	535	552	245	265	169	312	399							631	42	187	23	278	42	286	378	569	64							4	0	60	294	248	124	12	0	163	7							249
	123	2	437	748	792	390	684	216	220	314							317	33	497	347	541	79	443	488	406	174							1	10	266	530	384	149	213	41	157	47							158
	509	217	395	756	618	475	921	112	710	742							1979	411	465	292	619	527	456	675	287	443							1106	276	296	444	184	799	231	108	245	151							484
	601	276	399	500	719	713	709	134	1039	667							3042	406	423	233	499	644	203	655	1095	508							1374	298	269	440	231	820	153	97	746	288							449
	716	462	187	541	581	446	757	127	1059	541							2879	422	616	575	468	797	352	332	1210	206							1109	181	160	316	180	487	119	64	911	270							307
	733	369	202	360	521	449	807	129	1082	396							1874	286	377	583	372	317	587	425	910	501							678	203	93	307	94	318	91	31	675	250							353
	571	456	300	148	668	351	783	129	1138	368							1915	290	326	732	316	387	805	341	712	489							321	40	82	181	8	334	7	8	563	326							337
	553	394	323	283	817	218	752	42	1138	508							1232	110	423	753	339	226	776	281	500	296							377	143	30	282	39	174	61	20	267	361							351
	713	465	289	322	577	328	944	21	1228	480							1795	163	443	627	441	232	873	160	312	230							511	71	20	227	14	326	132	2	201	231							420
	536	493	198	420	653	269	980	88	1453	594							1198	224	450	557	559	161	540	309	133	361							500	38	39	272	63	514	120	3	201	130							646
	296	449	128	474	518	363	909	93	1502	640							757	317	378	567	740	96	996	524	210	336							481	58	51	487	22	354	111	56	66	182							790
	258	404	176	571	375	459	1149	32	1389	527							939	311	461	531	719	139	820	448	128	422							137	63	13	473	3	533	160	71	25	84							870
	235	294	192	589	216	629	1260	18	1506	846							880	243	446	652	912	129	858	317	208	367							242	34	22	417	0	552	159	56	39	57							899
	141	256	148	388	220	465	1410	63	1650	582							872	129	584	474	1122	98	723	359	369	272							105	61	21	363	17	456	121	11	88	32							730
	220	268	91	203	273	340	1635	19	1826	257							995	208	518	257	1208	81	528	392	499	307							361	100	6	336	24	374	26	5	68	36							498
	452	279	205	31	406	215	1858	29	1640	488							931	223	364	216	1411	49	420	418	592	248							427	127	9	448	3	336	39	0	66	121							344
	650	145	223	30	461	216	1504	1	1424	580							900	299	369	224	1146	22	465	376	533	220							368	93	14	540	8	413	90	3	151	150							409
	758	34	204	64	631	296	1719	4	1665	565							839	254	232	259	908	25	495	235	659	303							323	85	6	534	0	521	100	1	65	89							137
	582	28	131	74	620	444	1403	12	1309	323							445	118	125	163	886	3	430	228	821	360							194	56	0	293	0	649	145	0	13	29							193
	526	14	151	127	417	360	925	7	1087	427							318	92	9	121	928	19	209	191	917	138							90	0	2	180	1	658	54	0	8	11							159
	480	2	132	55	388	250	930	0	1129	404							140	126	16	10	917	11	147	160	890	197							37	2	4	143	0	368	52	0	31	3							128
	500	3	68	81	206	196	1036	6	1049	130							150	74	0	99	1032	6	78	140	891	77							69	3	23	217	0	255	23	0	47	1							132
	455	20	121	111	489	169	876	29	763	452							182	23	0	94	976	9	47	183	1001	205							62	0	36	420	0	274	28	0	48	3							75
	557	7	58	278	568	138	797	0	647	60							17	22	0	47	898	10	78	104	931	331							25	0	7	307	0	354	6	0	36	17							50
	533	37	28	182	1019	174	780	12	629	96							116	12	2	87	975	0	33	158	929	259							7	2	0	249	0	245	0	0	52	2							79
	428	98	112	149	931	141	726	51	650	162							160	8	0	48	819	1	2	89	637	74							18	6	0	69	0	227	0	0	117	51							29
	449	182	100	220	659	238	857	15	756	85							290	0	0	83	736	18	33	94	503	43							1	4	0	162	0	199	0	0	80	21							16
	436	137	308	105	595	350	1007	25	563	264							289	0	0	50	862	224	0	82	852	5							0	0	2	111	0	191	0	0	31	0							31
	530	125	317	4	730	339	1005	50	473	336							551	29	0	9	615	394	3	73	1094	63							1	0	0	25	0	148	0	0	12	1							30
	582	187	228	0	766	378	731	2	454	356							212	22	0	24	552	311	0	37	1117	59							3	16	34	56	0	241	0	0	11	0							76
	457	166	114	7	552	299	667	1	525	573							72	2	2	1	531	235	2	52	861	97							1	84	81	66	40	121	1	0	12	0							146
	334	42	245	215	475	204	825	122	674	591							166	2	39	82	366	117	76	165	711	113							0	53	196	257	52	139	13	86	26	3							103
	420	313	341	361	416	188	848	126	713	518							1078	159	113	105	158	366	187	274	691	290							123	157	244	415	122	356	104	138	18	143							478
	521	358	264	267	206	124	365	92	555	247							1534	300	127	186	324	433	296	233	1051	276							478	270	159	296	128	562	121	125	274	160							489
	453	315	222	139	624	111	464	126	725	171							1249	244	149	51	690	381	375	282	1155	476							438	310	165	375	92	555	48	60	344	110							239
	730	184	341	190	956	46	867	176	732	340							1258	210	146	48	705	326	498	417	1315	606							539	395	143	550	64	444	0	11	309	152							288
	886	78	366	261	942	88	835	211	683	423							919	232	148	35	610	344	576	293	1220	773							436	423	243	358	33	429	0	21	331	271							488
	907	117	334	318	823	39	448	164	935	411							768	190	143	32	509	342	596	375	1184	867							252	364	129	300	115	395	0	21	376	184							333
	818	114	460	371	1053	39	209	232	1225	232							325	250	111	176	864	380	288	523	870	821							270	307	154	245	110	475	0	6	438	108							526
	862	201	567	573	1202	51	153	234	1031	128							160	183	99	167	470	332	633	557	924	761							238	268	278	227	117	376	0	14	476	102							468
	887	208	494	789	1238	130	99	199	943	133							209	213	152	269	601	355	635	463	863	730							114	182	484	303	104	342	3	20	280	43							333
	907	155	494	870	1182	130	168	148	735	84							199	281	302	148	407	307	367	338	715	590							167	59	464	465	79	184	0	3	262	40							300
	932	182	420	757	1157	115	202	42	754	184							170	140	345	113	571	284	510	219	467	576							100	248	756	558	148	184	0	15	200	32							331
	958	199	297	596	774	75	243	21	993	154							86	198	281	64	458	218	689	180	372	721							277	313	632	723	336	226	0	3	202	15							329
	952	219	413	446	1018	168	452	46	1316	70							51	140	253	124	407	267	487	168	137	439							531	332	626	390	280	413	0	0	182	7							260
	864	136	390	373	869	240	809	78	1287	63							8	174	95	165	278	256	581	151	147	464							333	332	681	272	287	369	0	0	254	22							514
	763	317	311	232	1215	413	754	101	1266	15							0	199	84	83	310	294	310	110	256	418							128	233	609	201	120	194	0	0	227	35							572
	668	185	92	313	1210	513	759	82	1200	8							2	148	102	76	337	348	337	112	168	343							198	170	605	138	32	210	0	0	194	0							474
	614	158	265	100	889	453	512	123	1132	5							1	53	132	30	212	384	309	62	302	284							82	116	525	52	27	62	0	0	104	22							344
	545	146	245	208	504	320	101	164	835	0							5	21	24	30	222	465	288	120	212	250							12	13	561	24	5	102	0	2	117	0							370
	432	222	216	225	251	288	244	182	646	1							1	30	0	9	217	437	209	73	336	263							5	22	504	39	4	30	0	0	29	1							378
	403	63	161	239	313	232	189	184	495	4							3	6	0	39	283	489	185	66	356	299							8	89	365	35	2	47	0	0	53	0							158
	449	98	223	348	287	238	144	265	498	28							0	32	0	7	166	470	111	21	32	234							7	87	302	67	2	95	0	0	52	1							192
	621	148	201	378	184	313	120	290	318	103							1	0	0	61	51	467	95	76	214	292							0	80	185	49	2	126	0	1	4	1							188
	463	104	261	331	24	118	1	297	641	121							1	0	0	2	37	443	138	51	139	329							0	43	222	84	11	145	0	0	17	0							206
	433	117	284	320	76	169	16	305	463	181							0	0	0	0	25	375	33	53	137	272							0	25	135	163	0	136	0	0	95	1							128
	491	112	321	384	152	224	22	286	541	237							2	0	0	8	110	528	48	47	123	202							0	28	118	129	0	119	0	0	71	1							188
	338	121	251	360	124	374	5	278	267	185							0	2	0	0	73	361	116	49	411	150							0	139	203	122	1	54	0	0	51	0							157
	284	103	233	301	455	538	32	257	413	121							12	5	0	0	162	453	228	38	516	102							1	117	250	99	0	46	0	0	58	0							152
	280	201	53	298	498	426	52	369	458	132							0	9	0	0	222	306	270	37	449	141							1	5	290	66	0	56	0	0	61	0							319
	406	68	14	219	424	229	94	469	331	315							1	2	2	3	290	349	204	21	455	130							0	79	370	44	47	99	0	0	30	1							297
	394	82	197	384	492	56	633	467	294	323							0	0	95	33	366	369	359	128	353	164							2	16	439	94	156	112	15	16	63	8							355
	530	201	80	259	546	138	983	364	627	492							224	79	290	200	136	571	383	200	299	244							55	125	611	157	172	155	70	17	14	105							300
	337	144	67	213	473	44	1043	642	361	442							447	139	144	179	59	494	454	176	485	420							324	102	687	167	58	223	110	53	57	127							315
	260	175	195	173	584	125	390	1022	524	393							496	134	252	155	22	531	427	112	406	411							356	161	674	207	39	197	61	45	104	131							210
	264	145	283	180	521	55	658	1000	602	405							694	84	475	124	68	522	424	57	320	315							289	136	473	247	90	134	28	44	85	111							462
	181	133	253	314	557	128	933	500	397	465							996	28	589	50	218	628	304	84	159	243							171	171	567	190	63	62	8	22	63	142							418
	267	56	207	293	412	159	954	267	634	553							1539	16	585	141	319	458	447	40	206	332							79	208	541	136	0	33	2	19	63	128							560
	323	125	67	132	289	125	1157	192	202	592							1323	34	496	64	230	366	616	11	229	399							141	173	616	221	1	40	4	0	34	137							603
	126	89	83	287	207	201	1281	155	212	527							1182	91	493	24	136	436	678	3	223	220							183	236	642	284	6	66	19	6	29	112							338
	294	105	81	264	233	327	1324	115	281	602							902	148	464	23	129	439	701	5	224	190							185	167	434	365	0	61	19	12	33	41							298
	220	122	14	238	209	377	1173	109	99	684							1122	161	518	50	202	534	658	5	59	112							409	185	483	239	0	96	15	20	10	49							393
	234	152	84	298	308	506	1247	200	126	735							1388	72	330	28	223	536	562	0	133	61							376	157	318	254	0	66	13	4	76	73							322
	267	170	136	316	290	592	963	304	599	729							1716	93	266	28	82	549	531	0	72	158							424	255	465	179	0	85	32	5	68	70							229
	270	230	248	284	472	659	931	293	874	602							1680	48	269	15	81	448	446	1	95	278							458	370	475	168	0	94	62	8	46	105							136
	93	203	352	160	464	577	894	310	874	423							2308	33	207	13	143	508	432	0	291	132							627	311	480	189	0	60	48	1	16	80							105
	95	221	421	93	505	372	774	387	1004	577							2037	127	167	0	121	535	342	0	274	69							857	297	318	281	0	59	13	1	37	63							182
	35	66	354	105	694	363	728	279	1188	656							1516	195	24	3	43	428	319	1	200	108							909	258	439	222	0	66	0	0	0	57							267
	0	164	480	138	915	356	712	188	1109	619							820	106	23	0	50	380	203	1	179	49							941	251	209	190	0	59	11	0	0	56							308
	1	107	444	115	900	510	589	177	1062	543							1294	79	12	5	42	322	280	1	115	31							1009	165	237	148	0	68	0	0	2	21							463
	66	41	384	34	988	491	606	161	1007	589							1091	79	0	1	24	204	463	2	98	71							849	121	168	144	0	7	0	4	0	10							170
	87	34	459	0	724	456	687	233	1173	496							436	151	0	0	86	164	388	0	121	80							527	148	134	31	0	25	0	0	0	1							61
	0	117	528	0	609	318	619	140	1126	366							459	111	0	0	34	160	486	0	72	82							452	133	89	79	0	23	0	0	0	0							45
	10	117	582	3	326	384	609	59	1129	389							146	155	0	0	31	189	353	0	119	53							547	98	52	106	0	16	2	0	0	0							52
	11	67	583	1	353	342	559	67	868	307							298	144	0	0	55	203	301	0	32	49							388	130	93	54	0	38	2	0	0	0							85
	24	102	380	0	308	260	545	20	750	343							310	206	0	0	64	154	301	0	36	49							323	97	136	103	0	104	3	0	0	0							138
	42	97	240	9	224	171	452	14	930	284							239	185	0	0	37	220	320	0	30	4							423	60	80	145	0	23	0	0	0	0							126
	10	87	241	5	228	229	435	6	1000	228							248	139	0	0	49	276	295	0	4	9							453	42	118	156	0	89	2	0	0	0							141
	112	122	106	6	203	132	374	11	1036	149							308	48	0	0	53	205	193	0	36	51							617	47	211	176	0	44	3	0	0	0							63
	331	110	224	57	186	157	399	3	801	136							582	62	0	0	5	174	241	0	90	33							634	131	147	162	0	4	0	0	46	0							10
	406	44	399	31	194	198	482	9	990	187							726	51	0	0	12	69	265	4	31	57							578	163	144	113	29	2	5	0	69	0							19
	366	28	308	166	179	195	478	73	1035	182							753	18	27	6	159	23	172	41	25	14							515	74	370	140	80	2	28	5	9	5							66
	279	61	458	259	95	329	531	47	1192	187							1238	233	100	135	147	205	87	119	27	227							906	391	160	65	172	60	19	64	70	28							146
	269	142	549	242	88	452	561	91	1164	211							1680	275	80	155	59	90	81	193	240	151							1616	311	156	179	176	29	59	113	232	18							118
	535	204	496	89	75	401	584	162	565	257							2077	347	60	224	12	53	102	150	356	69							2028	185	303	279	105	86	167	117	237	1							110
	584	130	361	85	76	419	886	181	953	242							2206	222	28	179	9	21	95	75	315	51							1355	243	322	270	93	9	214	49	225	15							68
	429	100	371	172	221	370	721	200	976	161							2585	194	113	225	20	16	82	101	242	60							1378	124	565	239	143	9	208	17	148	22							34
	217	78	232	264	365	413	745	306	930	147							2540	228	114	260	8	30	129	93	202	59							1197	114	536	222	105	4	145	26	256	15							81
	353	6	237	264	466	506	527	334	930	131							2300	343	52	223	3	17	116	86	436	70							1330	123	391	174	89	8	149	26	172	41							435
	223	41	264	294	517	377	432	357	1239	59							2040	224	7	92	4	42	91	119	589	1							1797	95	317	114	132	16	204	74	174	4							270
	146	91	216	344	384	288	341	369	1185	88							2366	221	3	142	1	53	81	65	500	4							1944	130	187	79	25	9	225	94	199	43							241
	314	118	306	212	472	311	184	371	903	54							2192	196	26	170	2	92	11	52	376	1							1822	83	266	89	29	28	223	35	231	37							169
	413	31	306	294	330	370	209	404	821	9							1883	153	74	76	2	167	81	31	318	0							1603	91	318	48	4	50	230	9	259	39							108
	375	90	342	256	329	497	430	407	839	16							2136	233	55	77	0	185	16	17	533	0							1743	258	273	37	80	86	205	16	273	32							17
	343	142	254	207	319	442	276	509	929	66							2184	315	46	83	0	250	202	52	435	5							1471	190	132	2	150	190	241	23	243	4							6
	500	125	261	173	350	400	245	527	950	12							2074	304	24	56	1	257	150	18	348	5							1385	309	19	8	182	172	301	8	262	26							3
	407	144	345	242	279	487	268	417	942	28							1691	265	9	128	0	335	38	13	375	0							1101	183	33	1	154	43	281	7	260	33							1
	579	127	226	142	159	586	122	461	768	9							1612	229	0	92	1	358	8	4	404	1							1124	109	27	0	71	21	305	0	135	22							3
	674	139	406	111	111	606	213	414	618	35							1622	88	0	102	0	265	1	8	286	1							952	10	135	0	8	25	275	0	140	1							7
	505	84	216	74	163	504	182	318	755	49							1571	187	0	17	0	201	4	2	239	0							380	35	46	0	2	23	229	4	128	0							0
	705	60	181	13	368	514	147	213	787	39							1170	193	0	44	0	146	1	3	299	6							543	147	39	0	3	1	189	0	148	0							0
	593	29	122	22	404	453	81	252	642	21							1186	163	0	30	0	89	0	0	213	10							272	71	53	1	104	0	40	0	183	1							0
	595	18	100	66	402	471	11	149	478	17							1313	91	0	10	0	73	0	0	171	0							347	55	79	0	79	0	91	0	264	0							0
	459	98	118	20	301	288	18	278	287	0							701	149	0	15	0	82	0	0	170	0							430	1	49	0	31	0	98	0	353	0							0
	457	54	70	96	225	461	26	335	502	13							873	38	0	3	0	115	0	1	126	0							129	0	12	0	11	0	113	0	449	0							0
	398	27	72	151	160	454	35	262	375	149							931	34	0	26	0	81	8	87	102	0							336	14	10	0	2	0	104	0	322	0							0
	244	34	97	129	191	300	43	307	337	141							714	45	7	3	0	61	11	88	218	0							146	1	3	0	0	0	24	0	88	0							0
	105	9	74	140	136	255	22	307	367	170							564	20	0	10	0	70	1	27	392	0							134	24	0	0	0	0	13	0	167	0							1
	51	6	56	93	49	427	19	396	427	227							616	4	1	6	0	81	0	33	359	0							6	251	1	0	1	0	38	0	132	0							0
	83	2	53	50	41	415	33	366	466	198							675	1	0	0	0	111	2	15	250	0							14	143	21	0	12	0	46	0	148	0							0
	104	20	199	89	73	361	77	242	486	255							837	2	0	0	22	91	0	17	57	0							81	77	19	3	18	0	147	2	113	0							0
	87	48	216	121	217	526	102	434	554	259							1054	0	41	91	91	47	15	131	102	11							58	37	536	77	69	0	510	10	101	6							0
	474	84	53	68	188	509	147	580	450	201							1131	73	131	207	74	98	6	176	187	35							593	357	473	90	73	6	493	44	82	53							25
	1097	198	188	80	339	472	436	428	757	57							914	91	280	216	107	82	96	86	294	45							1402	544	170	79	26	51	279	105	277	71							157
	1302	210	163	82	642	207	700	458	662	101							617	68	237	215	34	109	172	68	482	80							1599	775	93	55	22	66	268	98	375	60							228
	1164	157	38	126	661	368	590	451	400	141							771	60	120	157	39	90	100	31	493	137							939	666	129	51	0	31	281	56	507	75							211
	922	139	341	160	590	265	573	373	321	110							1422	19	213	131	29	25	78	28	636	80							1032	544	132	51	14	19	280	18	268	19							506
	706	131	264	43	753	234	245	234	224	86							1761	6	89	90	5	36	9	32	732	136							1019	356	23	60	17	89	313	12	217	42							402
	580	84	429	118	722	166	181	388	282	69							1468	0	5	51	25	67	114	26	634	121							890	182	24	42	1	60	364	14	125	6							180
	601	28	177	124	708	297	136	263	295	111							1026	14	3	28	69	18	144	10	522	71							528	168	17	6	1	4	385	4	79	5							258
	530	43	196	101	709	276	148	233	322	140							907	9	0	54	50	54	123	0	320	117							642	255	72	7	10	28	309	8	15	13							280
	392	80	129	57	585	532	88	289	328	208							829	6	3	29	40	45	200	0	196	130							513	193	39	19	1	46	365	4	35	10							434
	360	63	47	85	463	305	202	397	111	194							865	8	2	40	42	6	352	0	229	65							374	240	87	10	0	0	516	0	3	1							386
	491	102	23	91	433	268	112	223	394	186							840	2	0	43	36	49	698	2	211	33							81	134	13	0	1	21	678	0	10	12							449
	544	89	7	56	280	351	206	80	282	101							900	0	0	53	8	41	784	2	175	27							441	124	10	0	0	43	583	0	28	46							546
	538	83	21	78	150	291	224	94	220	57							852	2	0	36	40	82	815	0	103	25							66	132	0	0	0	49	444	0	30	101							447
	607	68	41	91	90	323	145	85	244	92							524	4	0	79	40	29	745	1	133	20							165	147	0	0	0	58	471	0	0	37							325
	650	60	56	69	22	224	212	3	14	134							271	6	0	75	17	2	478	0	90	24							214	55	0	0	0	21	294	0	0	28							327
	701	12	32	97	57	165	80	43	0	190							642	22	0	22	15	2	630	2	69	22							188	65	0	0	0	10	114	0	1	8							264
	745	15	12	65	78	105	26	44	19	181							656	28	0	6	4	17	405	5	14	4							162	19	0	0	0	0	103	0	0	5							330
	738	3	5	53	244	26	43	41	64	291							511	0	0	4	32	2	257	8	14	4							79	28	0	0	0	2	178	0	0	4							272
	579	2	1	72	154	1	24	43	3	235							529	5	0	0	2	25	301	6	29	28							28	55	21	0	0	1	199	0	0	0							125
	328	3	2	11	117	36	13	73	0	89							664	0	0	0	2	24	188	0	46	21							42	43	3	0	0	0	289	0	0	0							149
	275	0	3	22	70	78	34	10	4	82							689	0	0	0	1	43	175	0	26	37							41	25	4	0	0	0	348	0	29	0							55
	55	0	15	19	5	57	48	62	40	119							971	1	0	0	0	14	184	0	15	17							93	6	1	0	0	0	344	0	123	0							51
	17	94	10	54	37	23	23	35	43	176							967	1	0	0	1	42	203	0	1	5							25	0	0	0	0	0	228	0	90	0							56
	24	118	95	60	31	42	41	0	0	320							833	0	0	0	14	14	182	0	30	5							49	0	0	0	0	0	333	0	64	0							99
	121	45	43	24	0	55	12	0	1	388							704	0	0	0	44	3	227	0	17	1							91	2	0	0	0	0	279	0	102	0							73
	139	40	111	59	99	64	1	2	2	404							414	0	0	0	5	0	205	0	42	6							37	4	0	0	0	0	221	0	45	0							45
	171	20	173	75	92	174	2	0	6	286							327	0	0	0	6	15	144	0	66	9							43	12	0	0	0	0	182	0	42	0							17
	14	2	80	36	190	370	2	35	0	241							240	0	0	0	35	7	206	16	292	11							46	21	0	2	14	0	154	0	10	0							148
	3	0	114	71	291	382	39	6	368	286							119	15	48	68	19	33	436	60	229	37							2	32	85	29	66	1	491	8	13	13							135
	134	13	96	45	313	425	149	21	601	290							355	102	141	238	8	152	423	139	10	40							259	95	229	42	23	211	527	24	18	64							197
	350	49	169	25	238	412	226	18	711	262							317	94	191	217	22	70	363	134	239	25							392	112	304	39	66	252	633	92	465	59							221
	664	47	134	8	154	142	163	9	598	138							325	115	126	184	14	110	271	103	273	60							755	73	224	67	79	154	321	111	604	19							147
	674	97	174	2	230	25	335	41	572	148							212	119	118	137	0	45	284	97	232	86							482	54	152	58	6	164	368	66	637	39							310
	636	112	112	11	69	18	306	45	761	95							63	63	125	157	0	90	298	84	242	65							368	11	60	55	45	58	456	39	607	67							241
	678	166	104	0	137	60	245	34	982	40							135	20	114	197	0	132	279	32	173	41							685	66	49	43	20	53	457	36	421	52							226
	796	129	137	0	35	161	251	14	1240	38							147	12	32	213	0	175	530	0	275	20							800	54	152	34	27	98	501	7	367	13							304
	750	127	67	2	40	258	276	32	920	11							93	22	68	131	2	211	476	5	158	48							677	14	163	3	17	66	508	1	419	3							219
	604	142	66	0	125	300	170	30	1113	119							16	4	58	87	0	222	262	9	116	41							917	28	406	20	32	100	450	43	395	2							84
	622	163	27	0	69	54	284	3	687	145							15	11	39	100	5	180	402	16	100	30							1562	14	462	10	32	112	462	10	388	5							140
	526	143	3	0	45	109	203	7	548	189							2	22	36	68	0	191	307	6	250	30							1659	30	183	29	27	42	220	47	560	1							193
	526	129	129	3	10	117	221	14	601	161							5	14	36	21	0	177	320	2	155	29							1817	17	104	35	29	45	323	0	643	1							49
	435	125	60	114	5	229	257	67	729	89							12	41	0	3	1	245	306	2	69	84							1971	35	3	7	5	42	379	35	753	8							178
	246	78	77	100	0	298	203	69	803	43							1	86	6	0	0	238	69	0	102	28							1548	19	6	2	0	49	307	44	773	16							336
	295	112	96	89	0	250	142	32	817	50							2	184	0	1	0	174	163	0	31	42							1605	31	4	3	1	47	169	19	685	0							358
	282	265	26	48	0	231	89	113	917	24							5	124	0	2	0	165	242	0	134	26							1386	17	1	0	0	76	159	0	560	15							351
	280	166	10	100	0	195	81	53	845	18							17	46	0	0	1	222	140	3	73	50							1615	61	1	0	0	98	136	0	359	1							220
	288	100	7	67	0	113	89	25	521	3							10	3	0	0	0	126	217	1	93	25							1274	41	1	0	0	38	153	1	419	0							97
	205	80	14	105	5	104	128	6	69	17							1	34	0	0	0	92	44	0	75	10							1019	78	0	0	0	17	180	0	446	0							8
	249	51	4	45	326	70	132	2	284	54							1	26	0	0	0	70	117	0	12	1							937	4	55	0	0	1	293	0	521	0							54
	225	22	98	20	294	9	109	2	225	54							3	1	0	0	0	64	127	0	8	8							797	3	0	0	0	9	175	3	502	0							31
	185	65	38	0	158	125	67	0	133	37							3	15	0	0	0	114	101	0	0	12							716	12	4	0	0	19	44	0	262	0							2
	113	30	15	0	173	169	56	3	193	7							12	25	0	0	5	91	133	0	0	0							967	25	0	0	0	0	90	4	150	0							3
	74	38	36	0	184	163	57	33	64	0							3	0	0	0	13	104	146	0	0	1							650	20	0	0	0	1	13	0	100	0							1
	98	42	11	0	207	168	65	79	31	8							2	8	0	0	83	103	99	0	0	1							316	3	0	0	0	0	4	0	166	0							4
	23	40	4	0	161	205	26	82	16	16							0	10	0	0	111	72	176	0	0	2							403	21	0	0	0	1	4	0	41	0							3
	49	38	37	0	150	156	0	107	11	10							0	0	0	0	38	99	86	0	3	0							472	58	0	0	0	1	18	0	69	0							0
	5	1	35	75	121	141	0	127	23	35							1	1	0	0	46	50	30	0	0	0							238	63	17	0	0	1	24	2	63	0							0
	0	1	58	124	89	239	1	91	16	15							8	43	0	1	77	73	42	4	6	0							152	16	0	0	15	3	135	7	122	0							3
	1	27	203	176	65	231	13	107	100	59							6	69	60	64	91	107	57	44	2	18							143	6	49	33	65	1	490	61	169	11							33
	100	85	116	193	43	174	39	149	1158	232							118	91	221	143	91	153	105	143	13	61							306	92	250	125	15	14	773	127	116	56							234
	43	142	94	84	64	56	42	221	1715	75							365	144	175	145	106	111	278	180	156	118							599	142	205	88	56	28	598	108	390	48							371
	127	225	99	187	71	6	64	244	1760	227							181	19	29	92	32	146	489	110	134	123							576	43	308	35	57	13	471	67	376	26							406
	218	208	138	208	60	10	41	145	1458	287							160	12	21	61	107	100	317	123	204	95							818	51	115	73	54	19	522	25	317	20							370
	178	280	169	248	83	23	57	51	775	259							142	4	9	49	25	232	337	62	157	70							991	75	231	71	17	5	539	4	257	48							210
	161	258	445	279	126	63	20	20	569	167							19	36	54	14	24	285	241	16	227	37							1106	53	142	51	0	1	501	7	250	99							223
	195	280	432	289	88	0	19	44	410	152							144	13	22	14	7	219	159	56	221	16							1016	60	87	41	1	3	424	1	140	98							92
	160	282	302	189	24	12	123	58	236	171							57	0	103	78	34	107	129	100	124	24							918	50	109	59	9	0	365	0	77	66							111
	182	126	303	266	36	40	209	42	254	120							7	0	116	16	51	94	81	78	109	13							984	88	214	29	3	0	391	0	141	76							209
	187	63	273	341	54	36	196	34	352	112							4	3	132	18	45	95	93	32	169	43							927	25	225	3	21	1	435	1	307	132							243
	171	70	346	241	5	16	152	33	440	194							5	0	124	3	85	37	116	95	156	8							764	50	343	30	70	1	524	0	242	95							393
	241	61	357	224	40	57	145	29	504	90							4	0	17	0	3	10	81	108	126	0							667	28	362	23	92	0	465	1	218	79							390
	123	39	400	231	4	41	168	25	521	72							34	1	3	27	10	43	115	28	151	5							630	9	332	27	5	2	355	4	166	93							338
	70	37	494	183	0	32	52	2	325	138							10	0	12	74	17	15	90	2	162	12							707	21	446	0	5	43	345	5	295	116							410
	42	65	536	191	0	32	38	2	257	76							32	0	1	94	4	12	15	5	157	7							603	21	461	21	0	72	509	0	147	137							341
	114	121	698	312	0	0	84	0	517	81							22	3	0	176	2	49	30	1	273	2							597	5	390	4	2	33	574	1	214	84							320
	89	86	678	245	0	22	12	0	642	39							2	2	1	161	7	89	22	0	251	3							285	17	365	2	0	32	445	0	236	8							123
	26	105	659	175	0	3	1	0	670	10							1	0	0	81	11	37	101	1	241	0							311	0	165	0	1	6	369	0	478	24							135
	109	43	557	100	0	0	5	0	482	17							0	0	0	92	13	14	100	1	219	2							276	0	270	0	0	0	273	0	189	4							207
	13	31	553	113	0	8	31	0	471	5							3	0	0	28	1	60	35	0	92	0							281	0	306	0	0	0	87	0	157	2							208
	1	62	751	128	0	1	51	0	450	6							6	0	0	57	2	68	24	0	41	0							245	0	212	0	0	0	205	0	98	0							288
	0	57	578	89	10	24	34	0	458	3							2	1	0	59	0	44	11	0	2	0							163	0	178	0	0	0	236	0	77	0							248
	0	82	649	73	99	72	16	0	228	3							0	0	0	16	4	26	2	0	21	1							147	0	217	0	0	0	270	0	160	0							230
	0	31	591	30	48	9	6	42	306	9							0	0	0	18	0	28	1	0	1	1							155	1	267	0	0	1	302	0	106	0							295
	0	51	577	88	33	36	7	65	294	0							1	0	0	0	0	12	1	0	54	0							141	38	171	0	0	0	273	0	152	0							182
	0	33	693	70	3	7	145	20	198	0							19	0	0	0	1	1	4	0	11	1							137	5	166	0	0	0	220	0	225	0							344
	10	58	797	105	17	29	273	10	361	1							5	0	0	1	0	20	4	0	1	0							140	0	130	0	0	0	295	0	217	0							363
	202	61	737	99	6	4	234	8	475	4							11	0	0	0	0	28	0	0	0	0							93	4	80	0	0	0	265	0	183	0							339
	275	145	755	72	20	105	117	8	507	15							7	0	0	6	16	10	0	1	0	6							135	2	52	1	1	1	180	0	83	0							259
	418	154	933	141	118	103	150	27	513	19							0	12	5	82	93	10	47	4	0	25							255	8	213	21	8	2	678	1	30	6							161
	314	227	916	97	235	121	179	222	755	201							60	35	68	229	193	87	51	30	5	59							332	74	371	43	0	45	626	23	130	96							545
	512	86	502	83	343	171	196	428	721	325							177	102	192	226	225	205	19	111	429	91							312	182	537	61	15	21	621	42	277	162							772
	320	177	757	69	518	83	247	436	800	287							170	144	200	185	107	199	18	144	429	125							210	125	509	60	18	17	475	76	465	139							750
	205	206	764	193	649	131	189	367	904	212							128	160	233	124	103	103	90	107	485	66							243	94	757	14	0	75	293	72	399	90							695
	268	271	597	190	614	146	154	317	1234	199							218	22	307	156	43	134	40	67	354	18							423	147	659	28	9	101	362	93	314	33							672
	206	299	648	138	372	176	145	132	1344	187							192	24	341	75	21	15	28	48	326	35							525	40	600	37	0	125	367	75	244	69							950
	77	179	530	195	353	88	133	60	1469	202							209	68	305	42	29	55	14	33	306	25							394	0	473	71	9	101	258	30	149	60							1014
	112	154	471	193	302	90	104	44	1338	88							250	43	79	3	61	104	21	25	315	4							243	72	500	75	0	94	407	59	139	39							890
	162	161	514	199	308	113	80	55	1384	37							329	29	139	54	65	142	1	12	295	10							282	54	568	48	4	140	454	32	211	41							826
	182	205	224	176	331	74	7	44	1754	52							145	11	110	38	34	180	10	15	300	5							350	55	729	17	0	72	381	21	303	24							461
	176	285	296	137	364	217	7	57	1858	97							95	41	106	9	18	253	17	0	305	17							302	7	852	9	0	30	383	45	446	27							442
	116	224	268	19	300	204	25	105	1894	177							84	60	118	1	13	262	0	11	236	5							140	14	919	12	0	46	304	6	386	20							271
	64	295	317	52	134	252	7	108	1901	174							74	42	43	6	38	222	10	0	214	20							139	75	1093	6	0	25	401	21	224	1							472
	28	378	246	66	98	203	80	99	1763	119							41	16	74	2	53	184	16	2	213	8							107	64	1022	2	0	24	510	4	206	25							370
	19	71	238	24	60	83	18	112	1744	92							39	96	6	0	19	186	23	0	166	22							59	171	1165	5	0	38	229	1	317	19							633
	0	171	202	92	53	65	9	101	2144	89							13	129	20	1	1	153	5	0	136	7							58	80	757	0	0	46	146	0	263	11							523
	6	146	153	75	40	42	3	63	1782	102							5	79	24	0	0	129	18	0	119	2							44	21	763	0	0	26	321	0	208	4							278
	0	147	371	0	8	105	42	1	1519	109							2	12	0	0	0	150	9	0	136	9							22	6	742	0	0	0	377	0	126	4							155
	0	145	440	21	18	64	20	0	1584	95							0	14	0	0	0	80	2	0	74	9							22	0	547	0	0	5	482	0	38	0							127
	0	122	288	160	57	42	0	0	1415	85							8	27	2	0	0	121	2	0	61	3							3	4	895	0	0	4	438	0	133	0							47
	0	49	236	187	100	21	0	4	1255	80							1	0	0	0	1	101	0	0	12	1							17	0	567	0	0	0	242	0	84	0							18
	0	23	724	212	88	20	0	0	979	146							0	60	0	0	0	70	1	1	31	0							5	3	329	0	0	10	151	0	101	3							68
	0	49	881	191	213	38	0	0	835	164							7	62	0	0	1	139	1	0	42	0							21	6	299	0	0	0	149	0	52	0							97
	0	6	662	202	195	34	0	0	949	217							1	62	15	0	0	187	13	0	0	1							6	4	312	0	0	0	288	0	7	0							25
	0	38	763	142	256	23	0	3	668	198							15	137	0	0	0	71	3	0	19	0							41	3	244	0	0	0	328	0	33	0							27
	0	40	476	144	245	12	0	0	1016	135							5	153	13	0	0	130	1	0	160	0							13	1	212	0	0	0	408	0	137	0							48
	3	13	268	110	298	1	0	6	674	118							14	132	0	0	0	136	0	0	218	0							17	0	212	0	0	0	331	0	72	0							7
	0	23	416	189	198	39	0	65	575	149							82	114	0	0	0	139	0	0	259	0							11	0	234	0	0	0	174	0	63	1							28
	0	0	553	242	291	57	0	128	547	173							109	147	0	0	6	107	0	4	130	0							32	0	242	0	0	0	275	2	75	0							27
	0	7	462	259	300	55	143	182	462	143							128	74	92	60	7	122	30	46	196	17							11	0	321	11	4	0	895	11	49	13							66
	145	300	329	293	316	36	340	135	903	153							204	148	198	129	28	147	91	138	186	15							240	47	269	21	5	44	1559	93	52	16							212
	434	321	376	284	194	84	328	199	787	139							201	328	321	106	104	165	43	123	261	74							427	61	253	2	10	142	1389	133	231	7							205
	368	361	544	124	190	117	233	169	462	184							99	266	287	125	114	185	16	90	239	87							308	33	256	2	9	123	842	69	224	7							241
	425	280	327	189	158	92	223	31	258	221							55	189	232	177	31	190	14	59	160	68							423	88	90	32	1	15	716	40	147	32							250
	310	306	177	122	190	56	278	4	632	166							72	214	161	139	85	179	78	56	158	22							357	32	176	0	3	21	690	10	107	40							299
	394	301	266	65	261	75	241	23	820	258							97	274	138	113	117	88	48	31	164	40							672	3	126	27	11	16	649	31	54	1							180
	276	235	303	63	89	29	230	2	781	169							181	256	81	165	41	109	4	7	129	44							668	9	71	2	1	1	460	27	78	25							153
	107	81	411	69	143	92	155	22	754	162							207	332	78	165	72	201	7	0	171	26							578	13	98	0	1	14	354	16	96	1							141
	229	72	413	82	177	49	158	224	598	226							144	305	90	194	41	334	9	26	223	33							415	77	34	0	4	6	262	18	29	18							51
	386	52	359	38	255	100	133	319	772	166							96	158	159	209	42	286	0	42	438	55							446	49	211	0	5	33	252	31	36	15							33
	314	96	372	87	269	79	87	291	472	220							11	149	123	99	23	95	6	6	265	46							444	6	186	0	0	26	250	30	125	20							35
	411	65	451	150	233	4	82	274	555	198							31	114	70	110	45	67	0	11	234	36							381	16	418	0	32	12	239	13	203	2							19
	367	153	179	217	163	45	46	285	381	216							10	84	62	46	35	88	4	1	195	63							195	0	342	0	37	30	256	12	145	0							12
	333	210	355	299	141	66	135	179	362	217							35	29	8	42	10	57	3	13	59	56							209	22	60	0	42	61	200	2	80	6							7
	342	405	163	299	110	98	172	153	123	302							33	30	0	62	12	61	1	1	8	13							365	0	129	0	12	2	167	1	17	12							1
	385	443	190	461	40	33	70	69	74	464							88	93	0	55	23	64	0	0	3	12							220	0	55	0	2	8	69	7	68	2							0
	406	206	100	384	4	36	61	19	69	657							28	54	0	36	1	25	0	0	11	9							256	0	20	0	11	4	49	3	24	1							2
	371	47	196	387	1	41	82	108	16	616							1	132	2	7	0	39	0	0	0	40							225	0	68	0	16	1	58	1	13	1							0
	251	124	303	346	3	64	101	14	3	546							11	50	0	0	0	9	0	0	0	16							144	0	212	0	40	0	46	2	1	0							0
	202	148	260	308	51	84	50	43	0	400							2	27	0	16	0	3	0	2	1	0							79	0	190	0	32	0	22	0	39	0							0
	121	126	379	263	144	66	9	42	1	400							3	18	0	7	0	3	0	2	0	11							138	0	287	0	2	0	178	0	256	1							0
	104	137	405	118	250	77	6	140	3	575							1	4	0	1	0	5	0	0	0	10							93	0	280	0	48	0	36	0	311	0							2
	127	170	206	86	142	34	0	140	0	672							6	9	0	44	0	14	0	2	0	13							24	0	176	0	10	0	113	0	310	0							1
	59	380	355	49	132	17	0	164	4	608							0	2	0	119	0	23	0	0	0	0							39	0	112	0	0	0	41	0	157	0							0
	92	297	230	109	115	18	0	118	7	535							1	26	0	134	0	14	0	0	0	1							38	0	142	0	0	0	11	0	138	0							0
	99	300	327	77	17	30	7	180	4	393							5	25	0	292	0	17	0	0	0	4							43	0	223	0	2	0	12	0	66	0							1
	97	574	173	80	19	46	4	211	0	264							6	23	0	173	0	46	0	0	0	4							48	0	118	0	0	0	9	1	133	0							1
	116	420	241	200	61	69	0	230	9	385							9	20	0	230	0	45	0	0	0	0							88	0	106	0	0	0	0	1	232	1							0
	71	511	307	115	81	29	0	157	1	385							9	13	0	147	10	17	0	2	3	0							88	0	72	5	10	0	68	0	113	0							0
	100	513	501	130	157	118	78	164	3	380							10	19	32	178	11	18	36	20	199	19							68	0	370	51	18	0	95	8	126	6							0
	186	779	523	202	60	123	195	113	418	606							74	33	98	167	1	39	53	73	93	54							249	64	447	141	45	11	192	39	103	9							114
	283	513	596	186	61	146	197	96	697	606							249	50	103	114	4	31	26	111	238	26							398	144	520	131	110	27	324	76	233	21							266
	201	558	694	105	34	155	89	75	900	638							141	27	57	168	0	32	22	59	331	35							636	128	473	96	41	2	320	66	232	3							146
	130	422	693	99	35	107	138	58	909	782							101	55	72	176	0	53	30	95	312	82							570	89	527	58	3	15	441	42	104	35							132
	200	385	319	78	7	67	200	52	720	839							133	26	165	236	0	60	11	74	284	36							438	30	465	9	1	14	404	19	56	22							165
	269	268	569	106	14	54	269	87	666	891							32	17	45	238	0	4	27	56	183	18							299	75	160	54	3	3	375	17	80	1							61
	372	305	510	143	1	188	323	50	692	855							63	16	24	297	0	9	13	89	114	15							360	148	357	117	2	23	539	57	48	0							40
	410	236	929	180	5	350	160	65	493	715							211	13	46	198	0	1	0	55	127	39							346	37	369	34	1	11	483	27	51	1							41
	337	211	902	163	59	385	97	15	680	947							259	11	48	218	0	0	0	31	165	19							230	73	118	28	1	34	366	52	84	2							12
	257	118	807	129	179	288	156	11	746	872							250	1	51	78	0	7	1	42	123	37							193	25	285	5	0	130	415	51	99	1							29
	310	197	712	127	121	274	147	15	813	716							331	18	49	47	0	11	1	83	130	3							188	1	342	46	0	118	403	46	160	1							8
	196	123	1038	230	194	263	242	43	694	861							83	4	71	36	0	9	0	82	411	38							160	0	302	26	0	106	307	31	242	4							1
	346	149	568	219	351	149	240	104	220	878							202	2	57	73	0	13	0	96	317	50							234	4	142	0	0	114	298	47	260	5							16
	199	107	641	202	239	151	145	88	211	682							338	0	8	174	0	18	0	60	187	14							169	0	175	43	0	75	403	5	249	0							1
	191	105	397	188	342	63	65	80	526	620							154	0	7	60	0	14	0	31	170	10							201	0	2	27	0	90	487	9	283	9							4
	249	124	473	213	354	61	99	83	635	693							177	0	15	6	0	9	0	20	74	3							139	0	61	12	0	97	377	0	356	1							1
	193	205	443	308	405	29	87	20	1149	705							239	3	1	9	0	29	0	1	38	13							22	1	14	1	0	22	265	0	455	1							3
	284	252	242	409	426	31	4	14	1273	506							97	0	0	1	0	3	0	0	30	4							0	0	21	1	0	69	162	0	575	0							2
	76	166	377	438	447	19	31	51	1076	464							122	0	0	0	0	10	0	1	3	2							26	0	82	1	0	41	292	0	548	0							0
	102	483	369	413	523	14	42	63	1006	539							116	0	1	1	0	23	0	2	0	2							58	0	37	0	0	9	232	0	528	0							0
	180	255	370	562	460	0	2	78	913	492							46	0	17	0	0	21	0	2	6	0							6	0	98	0	0	36	125	2	557	0							1
	104	185	313	611	502	1	1	56	939	512							108	0	10	0	0	27	0	49	5	0							67	0	46	0	0	28	132	0	440	0							0
	59	35	552	485	498	59	0	61	1019	176							92	0	46	0	0	11	0	0	229	0							0	0	6	0	0	96	187	1	486	0							0
	32	34	270	298	378	46	4	32	929	151							3	0	72	1	0	20	0	37	61	1							53	0	0	0	0	101	222	0	391	0							0
	30	7	124	388	304	19	4	23	923	373							0	0	72	0	0	8	0	3	226	0							53	0	3	0	0	54	196	0	244	0							1
	15	10	318	341	172	67	1	43	984	485							3	0	54	0	0	2	0	1	158	2							80	0	34	0	0	42	161	0	291	0							0
	134	21	151	260	181	24	9	97	767	316							0	0	3	0	0	0	0	0	97	2							21	0	98	0	0	1	102	0	270	0							0
	40	115	371	182	80	155	0	117	771	171							0	0	13	0	0	0	0	0	77	2							53	0	102	0	0	3	34	0	176	0							0
	21	26	377	212	187	376	0	115	511	238							0	0	0	0	0	2	0	13	82	1							50	0	43	0	0	9	48	0	251	0							2
	36	117	393	111	177	387	0	47	271	473							0	0	0	0	0	0	0	24	165	20							39	0	63	1	0	9	56	1	122	0							1
	45	70	581	148	24	323	3	57	376	302							3	1	0	0	0	0	0	0	175	8							18	1	17	0	0	0	15	0	257	0							0
	21	95	659	238	39	271	0	155	309	207							1	0	0	0	0	1	0	1	101	15							1	0	7	0	0	0	40	0	126	0							0
	14	104	616	390	16	161	4	189	1071	239							4	0	0	0	3	12	0	2	49	2							0	1	17	0	0	0	115	0	126	0							0
	1	51	608	277	37	154	1	169	1319	335							2	0	0	0	5	31	0	0	48	1							59	0	37	0	0	0	40	0	120	0							1
	0	21	514	266	15	194	7	215	1670	192							6	0	0	0	5	52	0	0	19	0							51	0	73	0	0	1	47	0	316	0							0
	8	42	538	300	173	236	8	267	1399	62							0	1	0	0	2	12	0	0	20	0							13	0	61	0	0	1	82	0	334	0							8
	11	57	526	349	121	289	3	304	1303	190							5	0	0	0	0	4	0	0	177	0							16	0	39	0	0	0	184	0	304	0							0
	64	58	703	398	6	257	100	240	1184	237							0	0	0	1	0	1	0	0	295	7							98	0	135	0	0	0	96	0	231	0							0
	52	153	515	532	9	138	138	205	1066	181							33	19	0	198	0	6	0	0	229	0							59	0	67	0	0	0	82	0	307	0							1
	21	24	379	578	3	32	9	177	880	52							0	23	0	188	0	31	0	0	162	0							12	0	27	0	0	0	115	0	374	0							0
	9	95	567	507	48	139	123	95	946	205							1	2	0	146	2	36	0	0	163	9							118	0	24	0	0	0	137	0	474	0							3
	38	135	649	238	9	102	169	161	922	30							3	36	0	139	0	7	0	0	230	3							111	0	111	0	0	1	374	0	486	0							0
	9	122	378	193	4	85	178	182	774	82							5	60	0	36	2	13	0	0	279	0							72	0	118	0	0	2	393	0	521	0							0
	4	111	285	177	28	73	128	132	297	35							2	3	0	53	0	3	0	6	181	15							0	0	138	0	0	0	282	0	419	3							0
	79	156	318	179	2	3	58	105	155	65							2	22	4	21	0	9	0	0	69	1							43	0	57	0	0	0	142	0	407	0							0
	201	302	366	158	1	12	67	88	402	25							1	43	0	74	0	2	0	1	160	0							43	0	10	0	0	1	229	0	328	0							0
	237	199	453	14	1	9	19	158	666	48							0	53	0	18	0	18	0	0	151	1							36	0	4	0	0	0	168	0	236	0							1
	306	241	601	0	5	20	103	82	487	101							0	18	0	22	0	102	0	0	145	0							1	0	0	0	0	0	65	0	196	0							0
	219	353	687	29	45	15	1	15	158	35							3	23	0	86	0	137	0	0	75	0							5	0	0	0	0	0	123	0	93	0							0
	306	524	612	14	2	130	27	121	209	21							1	46	0	19	0	47	0	0	42	0							1	0	2	0	0	0	139	0	217	0							0
	337	551	808	1	16	213	47	170	147	15							1	22	0	98	0	27	0	0	45	0							24	0	0	0	0	0	364	0	393	0							0
	318	404	1281	374	0	263	29	122	193	12							2	31	0	12	0	37	0	0	35	0							2	0	0	0	0	0	280	0	350	0							2
	258	477	784	530	1	247	50	95	161	14							4	9	0	2	0	15	0	8	55	0							0	0	0	0	0	0	264	0	325	0							0
	286	483	623	455	0	223	128	84	166	1							1	1	0	19	0	9	0	14	152	1							0	0	17	0	0	0	313	0	365	0							0
	361	396	652	276	116	239	57	68	173	28							0	0	0	35	0	25	0	2	271	1							0	0	0	0	0	0	272	0	298	0							0
	451	508	691	280	24	206	87	111	261	0							0	0	0	43	0	60	0	0	256	0							29	0	2	0	0	0	348	0	364	0							0
	343	470	655	115	33	269	21	100	533	121							8	0	0	72	0	12	0	0	197	0							17	0	0	0	0	0	395	0	412	0							0
	449	386	658	75	209	264	10	77	781	246							2	0	0	32	0	9	0	0	138	1							0	0	1	0	0	0	173	0	533	0							0
	658	346	578	163	110	197	21	21	776	239							58	1	0	44	0	9	0	0	88	18							0	0	0	0	0	0	69	0	525	0							0
	410	265	417	155	113	177	6	9	600	237							35	2	0	18	0	5	0	0	81	15							11	0	4	0	0	0	237	0	470	0							0
	180	374	533	225	277	213	21	101	456	354							22	1	0	114	0	25	0	0	100	9							1	0	6	0	0	1	177	0	437	0							2
	355	436	619	166	243	266	65	21	235	590							217	14	19	7	0	60	0	0	134	20							21	0	0	0	0	0	188	0	472	0							2
	356	659	852	111	292	195	158	43	98	672							599	0	63	57	0	25	0	0	100	49							0	0	0	0	0	0	219	0	634	0							1
	185	337	670	109	218	130	205	21	205	614							632	1	101	16	0	10	0	0	100	40							0	11	6	0	0	0	164	0	731	0							1
	245	594	635	53	192	148	233	76	349	561							571	0	200	18	13	24	0	0	116	29							46	41	0	0	0	0	166	0	699	0							0
	377	305	580	104	217	187	38	6	442	544							149	0	155	81	23	19	0	0	66	11							7	58	6	0	0	0	274	0	598	0							0
	442	276	546	48	261	216	79	19	627	864							563	0	88	29	20	2	1	0	212	29							9	33	3	0	0	0	191	0	671	0							1
	481	181	648	125	282	214	118	18	617	1092							330	0	111	65	59	2	0	0	244	41							1	32	2	0	0	0	140	0	811	0							0
	573	333	762	246	439	184	92	39	559	1001							440	0	15	21	44	50	0	0	429	49							0	12	5	0	0	0	92	0	633	0							0
	582	183	629	225	350	121	306	117	545	1078							563	0	8	33	3	76	0	0	358	70							47	4	4	0	0	0	136	0	669	0							0
	544	77	482	205	301	226	303	204	694	813							491	0	2	37	57	42	0	0	329	55							32	8	1	0	0	0	140	0	845	0							0
	536	317	557	180	201	308	318	162	619	1002							343	0	1	28	36	39	0	0	222	19							0	63	0	0	0	0	194	0	893	0							0
	545	351	541	198	251	335	238	137	264	830							325	2	26	1	4	9	0	0	144	25							0	115	1	0	0	0	195	0	768	0							0
	432	75	600	224	306	285	218	97	162	1097							284	0	9	9	8	15	0	0	195	49							7	45	0	0	0	0	182	0	711	0							0
	540	163	647	169	261	450	75	53	171	1070							358	0	79	52	47	6	0	0	115	91							0	45	1	0	0	0	140	0	836	0							0
	278	36	681	171	153	320	206	42	230	717							355	2	199	4	102	13	0	0	86	89							66	73	0	0	0	2	132	0	890	0							0
	171	10	568	222	51	381	45	34	385	572							107	1	202	2	125	16	0	0	103	26							9	95	1	0	0	0	89	0	495	0							0
	346	135	336	158	58	386	124	35	188	420							31	0	107	0	55	37	0	0	151	33							2	27	0	0	0	0	13	0	410	0							0
	362	666	222	124	70	254	98	10	166	290							87	0	61	0	48	67	0	0	67	8							0	49	0	0	0	0	3	0	377	0							0
	478	391	228	181	153	356	9	6	265	123							30	0	19	0	2	49	0	0	31	30							0	97	0	0	0	0	0	0	328	0							0
	484	146	104	212	168	474	44	7	208	139							8	1	0	0	0	60	0	0	8	6							8	78	0	0	0	0	30	0	284	0							0
	458	202	20	188	120	586	93	19	32	5							107	0	0	0	0	106	0	0	46	87							26	82	0	0	0	0	33	0	194	0							1
	612	83	17	153	137	818	89	1	261	84							150	0	0	0	61	106	0	0	133	27							20	65	0	0	0	0	12	0	134	0							0
	654	21	45	154	173	766	0	50	302	32							291	0	0	0	118	53	0	0	94	9							7	36	0	0	0	0	38	0	199	0							0
	450	205	1	152	121	627	15	43	403	99							248	0	0	0	168	58	0	0	72	29							0	0	0	0	0	0	1	0	171	0							0
	383	410	3	49	172	723	2	24	214	114							155	0	0	0	183	40	0	0	17	36							2	0	0	0	0	0	57	0	320	0							0
	498	460	10	83	310	725	0	25	458	50							168	0	0	0	81	28	0	0	19	28							50	0	0	0	0	0	24	0	346	0							1
	546	514	32	44	310	674	1	39	194	91							148	0	0	0	60	122	0	0	2	9							2	94	0	0	0	0	58	0	219	0							0
	670	458	0	14	226	729	46	14	292	2							259	1	0	0	99	124	0	0	8	2							50	55	0	0	0	0	46	0	166	0							0
	430	484	2	16	290	714	0	20	310	33							409	0	0	0	129	39	0	0	93	29							0	78	6	1	0	0	1	1	173	0							0
	302	508	29	19	409	676	14	26	268	239							332	0	0	2	195	52	0	0	64	19							0	97	3	0	0	0	30	0	70	0							0
	284	405	253	60	531	581	18	17	43	798							413	0	0	0	138	38	0	0	0	3							1	37	0	0	0	0	30	0	110	0							0
	148	551	316	124	588	338	0	83	448	1284							558	0	0	0	246	68	0	0	5	5							11	20	0	0	0	0	181	0	92	0							0
	243	587	194	201	834	645	1	57	693	1338							713	0	0	1	172	121	0	0	6	9							0	20	0	0	0	0	111	0	200	0							1
	245	326	144	151	676	531	9	60	734	1494							487	0	0	0	99	156	9	0	107	0							0	2	3	0	0	0	206	0	101	0							1
	328	555	238	175	650	507	20	175	593	1156							276	0	0	1	162	206	2	0	22	13							0	5	6	0	0	0	119	0	297	0							3
	296	700	335	264	640	408	6	254	505	930							177	0	1	1	142	197	2	10	109	3							16	4	0	0	0	0	286	0	196	0							0
	269	962	517	242	687	535	170	158	522	770							84	0	0	16	116	153	9	80	0	1							6	3	0	1	0	1	183	0	215	0							0
	145	616	421	207	633	541	267	196	413	689							149	0	0	5	149	252	26	94	0	0							1	12	0	0	0	0	229	0	50	0							0
	50	834	396	152	642	327	284	177	501	378							105	0	0	4	153	162	37	116	0	0							2	2	0	0	0	0	176	0	18	0							2
	229	541	493	134	674	465	170	249	521	429							139	0	0	5	178	46	0	102	2	0							11	22	1	0	0	0	369	0	33	0							0
	83	523	414	230	547	381	261	169	347	395							162	1	0	14	78	30	0	100	88	1							3	0	0	0	0	0	519	0	236	0							0
	115	492	390	160	539	336	145	180	269	153							133	0	0	4	183	98	24	66	41	0							36	0	0	0	0	0	692	0	126	0							0
	81	701	601	123	678	373	172	118	237	89							178	0	6	1	224	60	23	44	105	0							0	0	0	0	0	0	607	0	209	0							2
	54	710	509	43	563	295	207	55	189	244							27	0	3	4	286	12	12	34	0	1							0	0	0	0	0	0	473	0	149	0							0
	10	511	513	67	536	112	98	105	99	116							63	1	0	0	317	15	2	11	30	2							0	3	3	0	0	1	539	0	3	0							0
	31	426	560	63	394	71	43	205	65	67							23	1	0	0	325	1	45	11	0	0							21	0	0	0	0	0	730	0	0	0							1
	3	321	496	42	354	55	66	78	52	50							4	1	0	0	272	9	1	1	0	0							0	0	0	0	0	0	360	0	24	0							0
	0	322	300	35	440	59	74	35	24	48							2	100	0	0	221	5	21	4	0	0							32	0	0	0	0	1	300	0	19	0							0
	2	238	230	17	384	72	224	35	31	8							5	148	0	0	146	1	8	2	0	0							2	0	0	0	0	0	494	0	102	0							0
	14	357	363	22	383	31	316	44	142	38							0	111	0	1	70	4	8	21	0	0							5	0	0	0	0	0	312	0	66	0							0
	6	387	384	43	378	33	202	6	90	116							4	139	0	0	46	8	5	8	0	0							3	0	0	0	0	0	297	0	123	0							0
	237	278	432	58	214	72	189	6	161	187							9	71	0	0	4	0	0	0	0	0							50	0	0	1	0	0	466	0	176	0							0
	671	292	296	49	259	157	285	14	168	337							3	82	0	0	17	0	0	1	0	0							0	0	0	0	0	0	477	0	102	0							0
	932	198	286	48	256	257	253	7	289	443							1	69	0	0	29	6	5	0	0	0							7	0	0	0	0	0	368	0	1	0							0
	683	99	437	23	221	400	233	7	418	433							4	23	0	0	37	16	65	0	0	0							2	0	0	0	0	0	141	0	28	0							0
	369	227	480	111	278	624	225	4	379	473							1	16	0	0	55	111	33	0	0	0							7	0	0	0	0	0	170	0	51	0							0
	373	242	607	30	394	735	336	38	313	488							0	142	0	0	54	45	63	0	3	0							1	0	0	0	0	0	262	0	155	0							0
	664	287	394	41	344	843	411	33	550	514							1	23	0	23	25	32	87	0	0	0							42	0	0	0	0	0	148	0	102	0							0
	751	252	532	57	446	744	195	104	522	479							0	126	0	41	14	107	30	0	0	0							19	0	6	0	0	0	152	0	187	0							0
	673	97	439	146	437	585	96	137	625	405							0	81	0	16	18	144	17	2	0	9							0	3	1	0	0	0	150	0	278	0							0
	628	180	359	294	223	525	133	46	666	387							1	23	0	4	3	220	17	0	0	2							14	0	0	0	0	0	280	0	293	0							2
	634	379	149	104	66	400	247	42	471	503							11	136	0	13	35	86	2	0	2	0							3	0	0	0	0	0	292	0	288	0							0
	614	368	158	177	72	490	412	153	355	634							5	284	6	0	67	7	11	3	51	64							14	0	0	0	0	0	135	0	250	0							2
	467	378	266	200	77	611	410	149	221	716							4	65	0	21	51	36	72	4	92	72							0	0	0	0	0	0	173	0	144	0							1
	367	193	284	63	66	865	471	167	22	825							4	168	41	0	18	8	3	0	15	12							0	5	0	0	2	0	209	0	300	0							1
	432	102	309	39	51	960	429	186	77	622							0	179	79	4	20	19	49	0	38	32							23	0	0	7	23	0	172	0	248	0							0
	511	12	225	81	38	1127	297	39	95	481							25	145	37	1	41	2	17	0	1	12							20	4	0	0	13	0	115	0	138	0							0
	605	107	216	127	65	835	245	19	218	511							278	171	38	15	2	17	0	0	0	12							1	4	0	0	0	0	86	0	165	0							2
	675	40	140	262	64	705	285	0	209	309							473	56	38	57	1	115	6	0	8	22							1	0	0	0	21	0	51	0	236	0							0
	649	57	110	209	0	666	156	9	101	234							296	44	79	61	5	115	31	0	159	42							43	0	0	1	23	0	229	0	124	0							0
	717	548	173	106	14	381	40	33	52	246							160	17	94	19	0	174	3	0	143	57							14	0	2	5	41	0	272	0	199	0							0
	733	949	270	114	7	29	137	146	161	293							134	142	72	24	9	116	32	1	21	26							4	0	0	10	2	0	375	0	266	0							2
	625	917	405	83	5	75	83	81	243	306							201	283	20	72	0	117	47	2	31	46							2	0	0	37	6	0	496	0	102	12							0
	537	1024	436	41	1	197	183	35	112	320							229	268	8	57	15	163	8	0	24	62							0	0	0	30	45	0	538	0	106	1							0
	522	1017	386	122	63	242	193	110	144	216							128	126	4	195	27	174	56	1	16	37							1	0	0	25	28	1	528	0	258	0							0
	447	854	288	46	64	229	127	239	71	214							97	109	3	98	4	62	0	1	0	12							11	0	0	0	11	0	420	0	197	0							0
	453	840	217	0	28	129	131	228	74	159							142	79	0	124	21	69	0	0	0	19							2	0	1	4	30	0	532	0	40	0							0
	561	742	254	1	49	127	105	188	10	216							84	74	0	189	0	42	0	1	0	41							48	0	0	4	7	0	542	0	207	0							0
	498	663	153	1	71	193	50	134	82	321							102	38	0	107	0	114	0	0	1	25							7	0	0	39	37	0	640	0	468	0							0
	582	546	117	0	23	246	55	175	10	389							19	18	0	92	0	172	0	0	0	61							0	0	0	73	24	0	478	0	467	0							0
	764	284	130	0	35	400	85	194	17	411							5	34	0	55	0	88	5	0	0	34							1	0	0	61	0	0	252	0	311	0							0
	771	186	147	0	32	581	127	87	107	524							6	5	0	68	0	26	0	0	0	20							1	0	0	130	1	0	250	0	227	1							0
	608	236	167	0	4	665	157	161	252	650							0	14	0	79	0	122	0	0	0	19							26	0	0	177	2	0	192	0	256	0							0
	363	558	166	0	4	619	142	264	384	597							1	23	0	34	0	73	0	0	0	10							4	0	0	85	1	0	165	0	277	0							0
	544	524	222	279	3	659	96	84	584	446							3	17	0	83	18	123	2	0	0	22							0	0	0	53	0	0	131	0	228	1							0
	698	437	153	279	1	608	131	83	632	383							0	12	0	188	11	68	1	0	4	16							0	0	0	31	0	0	125	0	146	0							1
	471	538	131	294	12	567	202	125	473	283							0	12	0	185	77	240	0	0	7	0							7	0	0	8	1	0	144	0	96	0							0
	589	496	52	154	31	505	139	212	325	399							2	24	0	158	95	133	14	0	0	16							10	0	0	13	0	0	133	0	48	1							0
	392	348	41	71	6	493	186	55	391	390							55	31	0	174	72	88	15	0	0	5							0	0	0	11	0	0	94	0	62	0							0
	407	496	81	179	7	569	198	199	175	142							383	41	0	124	41	62	189	0	0	11							0	0	0	13	3	0	103	0	74	0							0
	325	510	78	267	10	743	167	60	280	115							450	14	0	135	33	88	213	8	0	15							3	0	0	68	0	0	104	0	106	0							0
	579	323	104	236	26	680	165	31	80	181							411	17	0	132	12	86	113	45	27	0							0	0	13	137	0	0	145	0	123	0							0
	718	412	110	179	25	465	230	177	126	302							158	19	0	126	29	197	19	73	29	35							17	6	6	142	2	3	108	2	125	0							2
	667	421	93	160	55	329	76	143	135	175							216	19	0	110	28	217	32	100	23	33							0	10	1	105	0	6	102	0	143	1							0
	454	762	73	193	108	131	202	140	229	210							101	3	0	25	72	159	84	98	2	15							0	8	0	61	1	34	152	3	157	0							0
	331	622	46	209	143	158	167	157	234	233							202	2	0	4	140	138	77	104	7	11							8	2	0	19	1	54	95	0	241	1							0
	293	552	37	259	261	207	52	112	328	179							277	3	0	10	140	126	111	71	7	14							0	0	0	82	0	92	99	0	187	0							3
	386	419	28	309	261	227	122	154	343	106							143	3	0	23	93	52	40	62	0	6							32	0	0	133	0	65	22	0	309	0							0
	321	557	10	436	391	256	130	174	55	124							83	29	0	251	52	76	98	37	0	19							0	0	0	119	0	35	55	0	276	0							0
	498	895	59	391	382	92	121	152	160	62							106	14	0	433	18	47	69	26	66	15							28	0	0	68	0	63	77	0	395	0							0
	401	968	102	381	203	6	63	232	63	64							143	12	0	575	1	57	34	5	129	15							0	0	0	102	0	58	52	0	382	0							1
	352	725	94	413	235	287	70	142	158	57							168	23	0	488	1	134	128	2	184	11							29	0	0	111	0	94	100	0	418	1							0
	387	771	93	448	122	319	16	188	45	4							202	26	0	581	0	78	160	16	123	61							6	0	1	70	0	135	65	0	213	0							2
	438	865	9	447	140	298	67	107	254	37							80	13	0	416	15	99	153	32	75	23							0	0	2	43	1	53	50	0	225	0							0
	474	882	21	325	254	391	77	56	220	47							18	13	0	310	0	47	130	42	95	9							2	0	6	27	0	32	27	0	265	0							0
	589	907	24	307	338	305	62	58	144	22							41	17	0	191	1	54	40	18	87	14							0	0	0	32	0	27	56	0	225	5							0
	465	653	1	302	313	498	90	87	145	9							45	49	0	135	0	9	11	7	42	36							23	0	0	66	0	20	41	0	76	1							0
	443	650	16	399	193	359	110	88	20	0							19	30	0	62	1	72	34	0	33	9							44	0	0	64	1	48	73	0	47	0							0
	642	548	5	356	181	582	131	57	189	0							27	8	0	66	0	113	53	1	30	2							0	0	0	33	0	34	12	0	13	2							0
	848	580	2	299	98	507	218	105	63	0							19	13	0	131	0	37	27	5	2	4							0	0	0	21	0	5	43	0	53	1							0
	911	693	1	298	179	552	154	17	19	4							9	19	0	78	1	110	7	9	0	0							0	0	0	23	1	7	68	0	84	0							0
	715	363	46	116	107	360	156	15	214	7							28	1	0	132	0	96	2	11	1	12							11	0	0	5	0	1	45	0	14	1							1
	538	495	101	42	360	275	161	27	159	18							43	4	0	52	0	114	0	21	41	0							9	0	0	7	0	1	96	0	8	0							0
	637	582	40	117	339	310	248	108	298	56							142	2	0	53	0	2	2	9	144	0							1	0	0	1	0	3	62	0	80	0							0
	505	713	89	8	207	331	293	144	314	121							71	3	0	21	0	49	0	71	232	0							0	0	0	0	0	8	34	0	86	0							0
	439	410	179	7	336	263	521	113	341	255							152	0	0	28	0	56	0	94	106	1							0	0	0	0	0	13	45	0	115	0							0
	295	645	381	429	342	267	512	79	291	138							179	0	0	44	0	8	0	77	22	1							6	0	0	0	0	34	16	0	100	0							0
	601	489	238	445	294	185	319	17	400	165							237	0	0	40	0	4	0	49	95	0							18	0	0	0	0	41	73	0	62	0							0
	832	620	459	187	374	214	299	32	480	410							325	0	0	47	0	8	0	57	45	3							46	0	3	1	0	41	72	0	109	0							0
	735	515	456	300	328	249	399	15	521	374							343	3	0	146	0	5	0	22	19	10							0	0	0	7	0	35	42	0	5	0							0
	634	573	270	163	208	216	351	2	276	428							205	0	1	56	0	3	0	1	36	12							0	0	0	32	0	54	71	0	41	0							0
	824	681	20	265	198	41	162	16	304	469							83	0	156	146	0	0	0	4	54	0							0	0	0	99	0	17	72	0	19	0							0
	767	492	36	45	380	282	119	19	157	427							133	0	251	145	0	5	0	4	115	0							5	2	0	75	0	15	18	0	3	0							0
	498	638	150	52	466	257	120	40	89	456							180	1	184	75	0	98	0	12	64	0							30	18	0	82	0	110	48	0	56	0							3
	563	416	147	123	542	189	181	93	222	425							104	0	151	45	0	72	0	13	32	0							1	12	0	97	0	59	45	0	102	0							0
	420	437	95	11	440	165	250	29	407	390							130	1	127	128	0	171	0	11	50	0							0	19	0	47	0	18	40	0	123	0							0
	592	559	90	34	399	81	382	11	519	360							74	1	34	183	0	58	0	10	1	0							15	2	0	24	0	39	67	0	153	0							1
	775	521	49	45	346	130	469	53	194	318							122	1	10	276	0	46	0	1	75	0							14	0	6	90	0	39	79	0	21	0							0
	1146	413	21	9	259	172	416	60	130	407							125	0	26	314	0	27	0	4	82	0							7	0	0	130	1	25	96	0	60	0							0
	912	577	0	33	177	460	375	4	211	530							66	0	66	392	0	22	0	0	55	0							0	0	0	98	0	12	111	0	27	0							0
	296	388	76	244	242	224	99	6	246	406							150	0	103	361	0	5	0	0	50	0							21	0	0	44	1	34	78	0	106	0							1
	410	370	28	72	320	54	234	7	241	389							137	1	251	386	0	0	0	0	38	0							11	0	0	28	0	2	71	0	26	0							0
	608	566	25	36	431	323	131	2	298	265							88	0	142	275	0	3	0	2	11	0							25	0	0	17	0	8	95	0	8	1							0
	581	438	3	4	366	195	65	4	286	426							58	3	128	281	0	57	0	6	35	0							10	0	1	12	0	19	39	0	1	0							1
	591	302	0	0	350	143	57	14	230	293							67	8	22	251	0	12	1	2	50	0							1	0	0	8	0	10	144	0	20	0							0
	654	401	7	0	317	114	207	11	261	279							48	1	103	100	0	45	0	1	20	0							0	0	0	7	0	37	236	0	66	1							0
	268	351	7	0	317	172	213	0	146	600							10	1	49	48	1	3	0	0	29	0							3	0	0	1	0	18	250	0	130	0							0
	263	182	0	0	233	318	88	0	137	848							55	0	40	24	0	0	0	0	13	0							42	0	0	6	0	4	265	0	32	1							0
	467	346	1	0	197	288	134	0	33	820							98	1	61	15	0	0	0	2	0	0							12	0	0	2	0	1	189	0	58	0							0
	374	194	0	0	211	137	337	0	113	740							132	0	108	46	0	0	0	0	1	0							17	0	0	0	0	0	154	0	23	0							0
	127	116	0	329	206	92	335	0	103	550							157	0	91	1	0	0	0	0	0	0							0	0	0	0	0	16	112	0	23	0							0
	200	140	0	350	134	98	149	0	67	373							117	0	83	8	0	0	0	0	5	0							53	0	0	0	0	4	92	0	13	0							0
	338	37	41	379	117	246	218	4	0	210							100	0	67	0	0	0	0	0	0	0							0	0	0	0	0	3	103	0	36	1							0
	242	201	108	331	138	454	235	0	161	127							152	0	98	1	0	0	0	0	0	0							39	0	0	0	0	4	144	0	148	0							0
	44	5	119	230	134	393	203	41	73	201							114	0	58	0	0	0	0	0	39	0							2	0	0	0	0	14	206	0	21	0							0
	226	25	164	142	126	278	64	82	0	219							56	0	15	2	0	0	0	1	57	0							0	0	0	0	0	20	202	0	87	0							0
	341	46	73	140	110	72	169	117	15	304							33	0	40	1	0	0	0	0	66	0							0	0	0	0	0	0	225	0	10	0							0
	118	41	32	153	182	145	12	157	122	289							41	0	44	3	0	0	0	0	55	0							0	0	0	0	0	0	163	0	8	0							0
	12	151	97	41	233	211	44	180	220	284							43	24	122	4	3	0	2	0	56	0							6	0	4	2	0	10	111	0	6	0							0
	5	186	118	66	416	166	191	145	109	272							31	30	33	0	0	39	0	8	102	0							0	0	0	0	0	6	184	0	62	0							0
	399	28	100	110	412	123	70	62	132	440							135	13	107	1	0	219	0	0	69	0							0	0	0	0	0	27	231	52	101	0							8
	177	138	105	107	204	89	35	76	128	293							43	34	102	1	0	82	1	0	79	0							0	0	0	0	0	16	136	87	37	0							14
	322	67	81	56	172	155	128	82	136	390							243	22	94	1	0	222	0	0	41	0							43	1	0	1	0	1	103	65	16	0							1
	461	228	149	130	257	190	187	56	134	387							393	15	162	2	0	163	0	0	75	0							13	0	0	0	0	0	99	42	12	0							10
	85	366	204	90	232	118	103	33	211	189							248	23	114	1	0	209	0	0	30	0							34	41	0	0	1	7	127	31	54	1							3
	277	119	118	187	141	72	159	21	152	500							45	21	90	1	0	107	0	0	50	0							67	41	0	0	1	0	127	20	96	0							0
	360	382	80	232	76	139	175	24	238	307							219	27	95	0	0	57	0	0	22	0							42	12	0	0	0	2	142	7	38	0							1
	230	426	64	75	104	250	134	7	223	243							226	7	186	0	0	82	2	0	35	1							97	17	0	0	0	5	115	29	34	0							6
	388	390	78	107	130	163	127	4	105	239							235	11	133	0	0	63	4	0	54	1							1	5	0	0	0	5	99	13	22	0							0
	347	254	139	53	196	37	207	2	178	295							304	8	41	0	0	154	0	0	69	0							16	4	34	0	0	0	75	28	18	0							0
	422	408	214	155	185	62	175	7	203	436							371	31	1	0	0	165	4	0	9	1							4	0	347	0	0	0	32	35	21	0							1
	477	500	136	165	169	103	172	9	196	471							306	0	3	0	0	87	63	0	0	0							39	0	296	0	0	3	81	22	2	0							0
	535	370	150	21	216	87	196	1	309	467							180	3	1	0	0	73	157	0	8	2							10	0	41	0	0	4	59	21	7	0							0
	334	358	110	57	204	68	141	10	338	616							302	37	0	0	0	106	119	0	8	2							5	0	151	0	0	6	74	13	4	0							0
	360	609	128	27	133	31	109	0	462	755							265	28	0	0	0	92	133	0	16	0							13	0	93	0	0	0	97	21	6	0							0
	142	538	103	154	162	11	171	0	633	653							281	15	3	1	0	42	110	0	22	0							14	0	71	0	0	3	60	20	6	0							1
	320	207	138	101	152	101	354	1	554	636							232	14	0	4	3	68	115	0	4	0							7	0	190	0	0	0	43	35	5	0							0
	67	318	237	117	177	83	230	1	514	800							236	4	0	16	0	91	93	0	6	1							2	0	157	0	0	1	74	7	0	0							1
	85	336	259	54	86	78	96	0	577	1009							276	15	0	10	2	119	91	0	1	1							0	0	129	0	0	0	35	26	2	0							0
	163	209	264	13	129	45	147	1	529	566							253	4	0	10	0	50	46	0	2	4							0	0	210	0	0	1	60	12	20	0							0
	87	293	290	26	46	4	147	8	643	207							226	2	0	0	0	66	50	0	39	0							36	0	23	0	0	3	32	4	6	0							1
	343	330	192	116	9	45	102	21	674	314							186	5	0	8	0	70	117	0	26	2							38	0	141	0	0	0	15	2	76	0							0
	322	333	120	183	83	40	49	30	612	439							204	2	0	43	0	44	96	0	47	1							0	0	36	0	0	2	24	9	36	1							0
	86	238	195	152	12	1	47	4	599	707							364	33	0	6	0	19	34	0	69	0							0	0	37	0	0	0	31	1	17	0							0
	204	215	236	105	0	10	112	4	534	502							337	25	0	3	0	25	103	0	16	0							0	0	100	0	0	0	88	1	14	0							0
	272	215	377	37	25	26	36	44	443	1043							583	8	0	0	0	0	81	0	0	1							2	0	181	0	0	0	71	0	1	0							0
	211	133	484	72	52	29	29	82	303	955							695	10	0	0	0	0	73	0	0	0							2	0	152	0	0	0	35	0	1	0							0
	364	194	464	116	4	0	84	23	288	757							605	5	0	1	0	0	64	0	0	0							22	0	177	0	0	0	60	0	5	0							0
	189	185	388	143	6	229	11	0	132	586							392	7	0	6	2	1	52	0	22	0							0	0	236	3	0	0	35	1	105	0							0
	289	137	274	153	12	335	29	18	105	781							513	6	0	1	0	1	110	8	42	0							0	5	239	0	0	1	45	0	75	0							0
	272	108	352	182	16	432	20	7	147	746							518	24	0	28	0	0	40	0	0	1							0	0	61	0	0	0	2	0	10	0							0
	141	248	471	202	31	440	12	7	344	422							467	4	0	122	0	5	6	0	43	0							0	0	30	0	0	1	15	1	15	0							0
	248	150	399	200	5	165	10	24	269	765							332	2	0	208	0	55	9	0	100	2							4	0	18	0	1	0	34	0	17	0							0
	224	211	449	304	2	147	35	26	339	885							281	16	0	143	0	112	10	0	110	4							9	0	332	5	0	0	123	0	21	0							0
	580	174	66	493	0	354	9	56	118	1125							302	13	0	98	0	222	15	0	74	25							0	0	390	19	1	2	99	0	129	0							0
	679	204	97	494	9	558	16	28	39	767							370	23	0	64	0	196	7	0	133	13							0	0	359	51	0	1	46	0	127	0							1
	419	141	128	556	0	590	4	0	109	265							482	22	0	21	0	50	4	0	79	6							30	0	287	26	0	0	50	0	76	0							5
	318	102	132	413	69	386	4	64	15	128							494	8	0	25	0	102	4	0	80	11							0	0	203	1	0	1	30	0	34	0							1
	656	154	177	404	158	243	0	155	99	51							410	3	0	81	0	70	1	0	101	6							59	0	145	24	0	1	20	0	106	1							1
	524	128	161	145	96	123	0	54	65	55							412	9	0	159	0	152	12	0	140	61							0	0	30	34	0	0	24	0	63	0							3
	599	273	276	28	2	143	0	108	22	48							542	15	0	133	0	286	8	0	161	38							10	0	15	17	0	2	18	0	19	0							0
	175	139	334	84	91	196	0	71	69	20							360	13	0	92	0	230	0	0	178	12							0	0	63	68	27	0	8	0	20	0							3
	304	116	249	24	19	112	0	34	20	16							496	0	0	59	0	176	1	0	165	33							0	0	117	105	3	0	35	0	98	0							2
	344	74	167	8	1	129	3	30	85	4							428	21	0	115	0	191	0	0	101	0							1	0	57	72	4	0	18	0	49	0							0
	241	48	307	0	17	119	53	1	96	13							415	14	0	62	0	96	0	0	29	12							0	0	100	48	1	0	14	0	1	0							0
	986	28	402	0	43	170	153	1	23	11							508	3	0	28	0	67	0	0	15	12							30	0	123	16	1	0	36	0	74	0							0
	1361	10	428	0	1	108	149	126	101	13							229	1	0	0	0	61	0	0	5	1							4	0	57	23	0	0	19	0	0	0							0
	1058	3	98	0	19	235	58	120	109	29							269	5	0	10	0	95	0	0	94	4							0	0	26	79	0	0	60	0	20	0							0
	423	81	87	0	28	113	68	90	148	111							202	7	0	26	0	124	0	0	2	4							5	0	19	81	0	0	42	0	4	0							0
	898	157	172	0	0	111	97	44	147	71							94	0	0	31	0	226	0	0	8	2							35	0	51	55	0	0	24	0	0	0							0
	891	104	79	0	18	190	140	82	140	220							113	0	0	30	0	180	0	0	0	3							3	0	6	77	10	0	63	0	2	0							0
	716	25	29	0	14	119	209	105	325	83							11	0	0	66	0	124	0	0	2	29							1	0	31	83	1	0	43	0	20	0							0
	380	8	159	0	5	311	213	46	452	77							11	0	0	220	0	45	0	0	0	21							0	0	7	75	4	0	59	0	166	0							0
	22	17	203	0	26	150	210	43	454	60							9	0	0	179	0	73	0	0	127	2							0	0	0	49	0	0	47	0	65	0							0
	30	1	210	0	2	135	263	16	481	37							23	0	0	124	0	136	0	0	143	30							4	0	0	18	1	0	15	0	61	0							0
	117	12	150	0	1	225	197	19	414	57							3	0	0	201	0	110	0	0	132	0							0	0	0	20	1	0	51	0	19	0							0
	127	36	112	161	20	198	217	12	201	62							10	0	0	90	0	65	0	0	179	0							0	0	0	12	0	0	41	0	2	0							0
	23	47	49	520	25	306	277	45	191	22							0	0	0	93	0	73	0	0	124	2							0	0	0	36	0	0	65	0	0	1							0
	96	50	86	599	37	401	277	18	447	80							5	0	0	80	0	82	0	0	68	0							0	0	3	4	2	0	60	0	0	0							1
	323	16	112	763	116	611	443	60	391	111							5	14	0	163	0	29	0	1	40	0							0	0	0	13	2	0	99	0	1	0							1
	661	16	70	616	334	395	310	11	210	253							27	0	0	124	0	14	0	45	87	5							2	0	0	23	0	0	89	0	13	0							0
	670	11	86	284	295	425	187	14	82	185							272	0	0	5	0	35	5	74	58	1							6	0	0	19	4	0	37	0	48	0							0
	604	25	23	557	285	315	169	14	232	439							564	0	0	137	0	48	16	82	57	16							0	0	0	41	8	0	122	0	39	0							0
	492	75	33	628	172	446	132	0	346	100							331	0	0	253	0	51	272	83	67	2							16	0	0	100	1	0	106	0	76	0							4
	606	90	114	416	148	426	220	1	257	42							166	0	3	136	0	52	190	52	338	0							40	0	0	42	2	0	79	0	42	0							1
	517	95	96	309	196	579	230	6	737	63							246	0	52	239	0	10	81	16	576	0							75	0	0	24	5	2	32	0	88	0							3
	404	184	37	198	277	575	196	44	896	142							136	0	49	441	6	19	59	44	531	1							0	0	0	12	22	0	72	0	148	0							0
	168	266	9	193	193	417	146	1	1161	139							73	0	14	488	140	4	50	28	356	1							0	0	0	19	16	1	77	0	50	0							1
	90	304	35	148	214	496	144	2	1464	545							118	0	79	510	257	22	10	18	388	1							6	0	0	11	8	0	110	0	21	1							1
	146	342	43	186	130	710	143	4	1152	391							90	0	89	396	199	0	47	73	175	2							2	0	1	6	0	0	72	0	32	7							0
	513	439	55	159	159	848	101	5	581	418							181	0	21	254	61	14	80	55	136	0							3	0	0	1	1	0	112	0	21	0							0
	231	344	23	323	215	720	92	33	264	592							488	0	1	405	63	14	22	14	145	0							0	0	0	0	5	0	78	0	64	0							0
	871	218	46	355	327	707	127	49	110	661							280	0	83	336	103	38	34	72	175	0							0	0	1	2	2	0	82	0	46	23							0
	816	185	161	428	287	324	16	33	82	750							621	0	12	314	116	7	8	33	67	1							16	0	1	0	2	0	27	0	49	27							0
	990	209	104	356	360	754	1	17	56	927							679	0	62	266	52	10	84	57	35	0							10	0	0	0	0	0	26	0	82	7							0
	655	106	189	361	437	841	93	4	76	790							352	0	26	383	60	1	35	47	18	1							1	0	0	0	0	1	62	0	54	18							0
	686	194	143	612	218	672	69	1	110	879							135	0	3	365	129	2	50	33	83	0							1	0	0	0	0	0	88	0	80	26							0
	514	103	56	593	267	708	1	0	101	612							86	0	0	162	202	1	8	19	59	0							0	0	0	0	0	0	104	0	39	6							0
	375	80	339	506	181	573	5	1	113	842							121	0	0	311	181	0	27	42	73	0							2	0	0	0	0	0	86	0	14	16							0
	101	114	292	549	163	383	0	32	229	999							112	0	0	263	166	2	1	74	115	0							4	0	0	0	0	0	66	0	128	4							0
	324	74	148	633	136	415	1	28	119	786							139	0	0	257	90	16	1	90	73	2							22	0	0	0	2	0	112	0	92	4							0
	136	195	215	456	158	241	0	3	227	125							126	0	2	231	14	7	2	122	41	0							0	0	0	0	4	0	68	0	113	2							2
	13	159	167	377	136	44	1	5	97	471							53	0	5	320	20	1	42	88	33	2							0	0	0	0	4	0	234	0	127	0							0
	111	175	77	360	124	185	0	8	85	171							37	0	0	242	44	28	122	81	160	2							0	0	0	0	35	0	191	0	134	0							0
	28	83	151	303	137	84	0	1	24	472							0	0	27	230	29	12	105	86	117	0							16	0	0	0	13	0	153	0	110	0							0
	17	225	180	163	118	34	6	1	21	260							21	0	0	234	77	12	73	32	69	1							13	0	0	0	5	0	83	0	21	0							0
	119	210	237	145	229	212	16	9	24	593							13	0	0	254	157	8	53	61	37	0							0	0	0	0	32	0	55	0	36	0							0
	0	300	348	134	183	266	48	11	101	590							14	0	0	447	129	6	3	64	12	0							0	0	0	0	26	0	96	0	174	0							0
	40	227	430	92	211	175	4	13	185	750							6	0	0	327	94	2	75	34	10	0							0	0	0	0	4	0	145	0	104	0							18
	128	147	383	64	81	388	30	20	184	586							2	0	0	316	17	21	110	7	141	0							10	0	0	0	11	0	59	0	101	0							0
	16	119	472	189	61	181	0	25	175	504							6	0	0	207	1	9	96	38	68	0							0	0	0	0	16	0	97	0	58	0							9
	89	146	425	162	141	68	2	3	168	512							108	0	0	165	3	8	100	24	117	5							11	0	0	0	13	0	4	0	134	0							9
	258	137	293	7	209	11	2	5	103	426							218	0	0	194	19	0	112	22	175	0							10	0	0	0	14	0	74	0	133	0							8
	388	257	266	169	172	5	3	10	124	446							117	0	0	134	43	0	57	58	151	0							13	0	0	0	9	0	53	0	54	0							5
	395	118	372	95	218	16	0	4	111	319							26	0	0	77	24	0	136	0	123	0							46	0	0	0	1	0	3	0	4	0							4
	510	76	430	70	207	1	0	9	2	345							31	0	0	53	38	0	175	31	69	0							0	0	0	0	2	2	2	0	31	0							1
	647	2	359	125	248	81	0	24	24	303							8	0	0	68	13	24	183	0	29	0							1	0	5	0	1	0	18	0	66	0							2
	579	144	252	70	180	231	1	58	3	237							47	0	0	51	17	86	99	19	29	0							0	0	0	0	0	0	42	0	40	0							1
	218	94	195	114	151	230	1	79	0	202							38	0	0	82	0	17	179	6	29	5							14	0	0	0	0	0	99	0	10	0							0
	774	93	142	92	195	202	0	46	2	303							67	0	0	31	2	15	246	10	39	1							0	1	0	0	0	0	77	0	96	14							0
	644	127	332	19	270	36	0	47	0	61							76	0	0	93	1	10	154	1	21	0							0	0	0	0	0	0	157	0	61	53							0
	892	265	439	32	304	5	1	49	0	344							21	0	0	74	0	1	62	0	57	1							0	0	0	0	0	0	104	0	53	26							0
	608	290	404	39	261	16	11	100	0	288							25	0	0	125	20	0	52	0	19	1							0	0	0	0	0	0	149	0	54	1							0
	230	148	493	112	354	36	1	170	4	488							41	0	0	50	67	18	39	2	27	0							0	0	0	0	0	0	139	0	96	10							0
	224	213	490	218	224	5	0	155	51	386							25	0	0	87	0	0	46	2	0	0							19	0	0	0	0	0	167	0	21	9							1
	231	191	417	10	313	37	0	103	99	470							5	0	1	11	14	5	86	3	1	0							5	0	0	0	0	0	169	0	45	4							0
	133	149	447	13	443	191	0	174	123	546							11	0	2	103	0	1	24	1	0	0							7	0	0	0	0	0	217	0	54	0							0
	98	127	184	144	471	138	0	195	182	517							0	0	0	69	0	2	33	0	1	0							1	0	0	0	0	0	158	0	12	1							0
	101	141	102	298	399	98	0	172	393	374							0	0	1	9	0	7	40	0	31	0							0	15	0	0	1	0	119	0	26	0							0
	30	229	164	133	231	53	1	249	459	173							0	0	0	57	0	2	22	0	10	0							8	10	0	0	0	0	34	0	28	0							0
	17	170	58	104	268	27	2	225	520	42							0	0	0	120	0	19	1	0	16	1							2	19	0	0	0	0	67	0	32	0							0
	114	90	14	296	452	3	1	146	408	90							0	0	0	130	0	4	2	0	16	0							0	23	0	0	0	0	54	0	49	0							0
	97	244	53	448	411	12	0	152	421	32							0	0	0	48	0	1	0	0	0	0							1	7	0	0	0	0	45	0	28	0							0
	284	51	9	535	386	61	0	145	431	168							0	0	8	107	0	1	1	1	0	2							0	0	0	0	0	0	32	0	41	0							0
	418	129	33	491	348	55	0	228	415	216							0	0	0	22	0	0	0	0	0	1							0	0	0	0	0	0	90	0	66	0							0
	466	106	0	410	484	160	4	393	292	396							0	0	0	172	113	5	0	0	0	6							9	0	0	0	0	0	43	0	63	0							2
	533	48	1	369	567	151	92	510	110	347							0	0	0	166	244	0	1	0	0	7							46	0	100	141	0	0	68	0	14	0							0
	632	8	58	247	1154	74	926	619	238	285							0	0	28	940	576	29	367	184	1	48							31	4	980	1199	112	184	801	0	0	299							0
	1394	11	122	216	1054	1096	619	917	384	365							0	0	32	161	753	306	294	349	210	293							1549	1363	1301	1311	1443	1597	1073	8	0	588							0
	1711	149	772	516	1122	1050	1236	1061	436	211							758	4	1011	623	919	422	214	387	465	285							1220	1062	1275	1260	1551	2006	820	807	1	434							1694
	1137	512	1126	696	903	1030	1247	2015	541	338							1223	471	1030	526	978	762	392	440	610	396							597	1280	1554	894	810	1918	945	750	1836	492							3205
	967	816	1220	688	547	1595	1044	2068	1089	202							1153	200	625	688	756	878	1068	622	618	741							1209	698	1257	1040	1806	880	1658	904	3131	568							3687
	2103	587	1640	857	342	1755	682	2635	1058	521							1282	721	1042	887	732	781	1722	684	566	895							1579	2430	994	1531	2110	2074	1921	823	2396	565							3471
	1555	1079	2750	580	266	2154	552	2730	1336	894							1199	1583	1065	565	742	815	2516	482	257	929							1878	2751	984	1588	1794	2460	2281	1292	1820	636							3112
	1073	1214	4016	956	196	2961	404	3677	1815	1157							1201	1335	1567	326	776	836	3148	493	363	1151							1937	3212	999	1488	1049	2647	3228	1303	1707	521							2705
	1074	1560	3365	1186	182	2818	975	2715	2244	1470							1343	1243	2268	388	1581	680	2243	468	1217	1055							1582	3139	1256	453	1205	945	3235	702	1724	425							2942
	1025	1515	3277	784	710	2822	1291	1147	1966	1549							1235	1448	1878	224	2485	709	1408	344	1241	1114							1482	3137	1509	663	1271	1006	2399	369	1558	417							3285
	714	1768	3853	891	1851	2017	1634	1130	1651	1299							1254	1163	1714	494	2508	463	1551	307	1183	1089							1992	1646	3980	404	2183	807	1910	990	1523	615							2791
	1015	1744	2583	1245	1859	1352	1712	1459	1531	925							1656	1068	1680	620	1934	467	1524	920	1314	842							2041	1781	4542	252	2785	500	1434	1107	1715	699							1484
	1343	1304	1494	1571	2065	877	2608	1105	1245	584							1855	986	1613	392	1071	581	1206	1176	1248	605							1606	1906	3664	637	2753	298	1225	1025	1288	559							1050
	1411	713	1039	2304	3205	857	2354	1331	945	601							2003	1111	1498	476	996	1008	934	1113	1003	740							1589	1576	3436	1329	2730	269	1175	818	1059	620							1313
	1188	772	1267	2359	2908	623	1874	1201	871	491							1836	1377	1811	503	903	1266	955	1106	998	497							1765	818	3305	1594	1364	480	1427	690	752	630							2250
	501	801	1723	1649	2303	739	1773	1263	854	635							1526	808	2210	616	1015	1260	574	1237	1499	384							1506	988	3055	1636	828	681	973	653	168	631							1451
	938	804	1115	1061	2933	819	1609	1069	961	1017							1529	912	1524	779	1232	1148	703	1242	1869	398							1221	994	1168	1557	737	253	751	396	392	874							1057
	2492	929	1343	1141	3471	1015	1331	647	762	1118							1663	870	946	1446	1697	1303	873	1197	1823	277							1264	919	749	1481	1721	280	658	356	1692	1012							801
	3213	518	1196	1171	2577	830	1102	602	1296	1612							2326	920	560	2038	917	1376	644	1293	2211	347							1730	580	1125	1335	1516	304	813	442	1248	909							691
	2597	353	925	1551	1989	874	827	564	2032	1474							2695	1206	944	2075	988	1384	796	1373	2828	471							1873	703	783	1266	1532	214	490	349	1069	1056							585
	1797	227	516	1753	1244	1224	1080	639	1942	1350							1887	1705	1035	2219	2083	1612	1172	1310	3494	359							1919	1129	1320	1194	1826	285	820	218	1290	1085							763
	1674	158	915	2166	776	1880	1519	609	1855	1510							1853	2428	1320	2648	2331	1635	1531	735	3254	564							1615	1212	1351	1305	2783	609	872	260	1681	1340							954
	1897	209	851	2429	1472	2112	863	782	1202	949							1242	2788	1900	2334	2786	959	1467	618	2846	862							2425	1262	1440	1626	3278	636	1004	380	1785	1353							1350
	1158	57	1219	1605	1867	2623	733	631	1646	790							886	2811	2296	1929	3349	1190	2279	353	1981	819							2554	2010	1806	1331	3277	785	914	604	902	1015							1631
	977	226	1527	1701	1876	2149	684	511	1959	675							542	2493	2110	1638	3690	1041	1686	153	877	1300							2963	2275	1852	832	2353	1113	1864	671	736	593							1640
	901	830	1433	1202	1978	1195	1165	603	3336	516							803	1991	2129	978	3513	1069	1745	399	1342	1429							2896	1916	2166	435	2038	1372	1789	974	697	661							1752
	1159	928	1784	1418	1027	1034	1458	438	3131	657							818	1897	2753	1302	2212	677	1833	417	1618	1529							2834	1366	2069	614	1711	2029	1459	1087	2199	306							1510
	1092	1338	2446	919	1163	790	1750	677	2848	503							1175	1875	4608	1333	1780	460	1593	518	1811	1723							3273	719	1530	569	1796	3745	1843	1008	2379	176							1419
	1182	986	3802	2491	1728	655	1468	1297	3558	429							1216	2130	4941	1216	734	602	1585	786	1630	1336							3338	671	1112	668	1731	3805	1742	1363	2307	99							1464
	1117	1486	3481	2583	1035	659	1062	1421	4648	644							1092	1696	4324	696	764	427	1049	812	1259	841							2608	628	847	861	2229	3401	1464	1206	2392	261							1537
	1347	2037	3761	2017	664	746	1101	1148	4285	377							1231	1758	1886	709	485	537	726	931	1531	455							2145	459	1027	864	2271	1725	1354	1413	1672	307							2104
	1293	1122	3731	2014	593	831	777	1008	2728	633							1032	1701	1183	1208	868	510	983	645	1861	407							2021	589	1054	947	2336	615	1191	1129	1532	662							1965
	1393	1411	2680	1794	320	715	818	600	2242	675							1107	1285	640	1381	995	796	796	617	2137	348							1375	509	842	918	1842	1302	943	1153	981	730							2129
	1085	1675	1684	2530	183	729	997	510	2175	735							1164	1194	588	1773	932	640	669	644	1866	220							960	354	859	735	2040	1475	855	844	913	529							1073
	828	1518	620	2709	274	796	1136	278	2144	584							1221	804	508	2252	646	667	606	503	1637	159							822	674	775	780	1873	2217	669	726	677	538							768
	675	1796	330	2750	206	602	1041	239	1516	624							1389	667	388	2147	705	674	506	434	1771	273							775	476	531	543	1548	2388	763	728	592	831							1058
	441	1482	387	2676	180	571	1026	96	1756	523							1337	416	458	1740	773	626	557	464	1158	317							770	387	318	545	1018	1410	657	701	772	858							767
	768	1475	547	2700	4	545	1126	177	1142	372							1529	632	650	1417	732	445	490	481	695	377							946	341	318	576	1035	1852	198	443	486	705							632
	1199	1228	744	1295	79	376	1060	159	1672	462							1689	753	643	890	500	390	475	436	570	411							826	278	314	474	1023	1540	260	627	798	774							677
	1413	1026	940	920	106	450	856	106	1484	379							1909	743	643	752	529	397	441	348	416	464							880	292	479	367	747	1294	275	521	890	553							655
	1318	1201	1095	983	43	580	640	121	1494	428							1441	360	511	637	535	449	484	344	601	441							782	246	445	353	237	1091	144	443	804	647							512
	1020	883	1136	1185	71	410	579	90	1516	470							1178	34	579	741	865	303	391	354	714	325							509	255	399	292	436	992	183	571	834	596							569
	1202	950	728	579	24	397	564	49	808	485							1024	42	554	682	691	346	475	310	610	258							284	284	375	244	291	1002	226	468	960	531							563
	1198	749	647	1043	79	461	348	117	845	469							814	107	557	589	482	366	481	331	649	160							256	206	360	201	159	642	120	421	958	451							415
	1156	861	802	786	243	403	331	90	929	478							550	94	440	462	523	234	386	349	307	112							202	211	394	150	119	760	234	452	684	386							434
	1653	747	765	526	167	523	146	46	817	467							532	59	449	446	624	160	421	255	421	156							427	292	149	117	131	508	239	309	486	268							277
	1601	361	623	748	87	718	215	60	570	348							1031	339	358	376	533	174	279	141	468	179							237	330	295	48	317	792	106	198	612	237							371
	1500	566	515	784	76	561	321	32	490	410							1222	643	310	378	366	131	169	116	437	77							294	317	319	133	840	697	159	171	589	233							370
	1598	799	601	921	54	651	281	56	417	257							864	642	487	260	344	166	88	117	239	79							130	386	331	102	999	480	186	197	449	260							352
	1142	858	455	807	76	533	379	49	527	215							728	637	432	225	287	55	58	105	330	88							264	551	388	55	802	363	106	184	272	217							622
	895	192	381	515	9	426	207	4	594	128							833	426	552	310	199	71	108	115	274	100							331	551	359	66	592	322	52	214	175	209							693
	732	247	378	620	96	475	53	48	517	182							692	134	603	264	175	82	76	88	237	200							66	488	374	82	335	153	4	266	168	297							729
	813	96	347	857	47	543	35	27	531	160							622	53	513	252	235	62	72	71	197	62							172	238	372	195	282	148	0	237	224	231							445
	1013	328	541	664	0	505	54	20	542	84							384	104	324	377	419	30	67	44	325	114							376	258	423	265	128	88	24	255	156	347							687
	1084	105	417	766	9	565	173	4	271	57							239	290	584	341	452	111	17	257	407	63							306	231	527	351	123	321	3	174	220	328							798
	1417	24	361	477	19	432	119	2	212	166							356	349	633	219	238	102	103	184	373	207							283	231	495	330	231	221	51	240	261	186							792
	1087	38	314	457	0	337	345	19	366	237							764	259	527	207	261	68	80	317	363	114							331	286	421	143	302	131	7	142	255	232							638
	482	4	244	431	21	492	378	11	317	185							523	161	410	254	252	78	51	87	344	56							229	251	310	288	164	191	35	129	217	132							671
	486	2	196	293	13	595	293	98	225	76							688	130	682	162	199	90	36	112	302	158							228	216	295	121	116	637	108	147	223	150							779
	343	3	158	411	45	549	247	103	287	51							732	114	543	222	243	101	107	79	216	83							287	186	227	195	319	567	14	239	82	149							840
	223	0	211	424	243	623	159	102	290	31							667	78	348	75	262	60	78	126	210	95							286	399	90	203	254	586	49	311	79	212							853
	473	0	259	349	206	673	146	68	300	6							996	44	405	198	246	39	134	172	232	149							360	316	112	130	472	632	29	311	16	207							719
	334	6	244	257	230	712	67	64	428	17							526	59	647	153	401	16	174	171	145	36							384	192	127	136	515	490	84	169	9	175							802
	239	0	335	87	117	635	84	73	299	13							494	33	625	151	345	39	156	195	173	54							198	358	150	114	389	475	72	38	46	111							878
	343	0	323	129	155	620	44	89	513	1							342	81	477	148	148	58	120	130	112	154							164	385	116	86	356	595	50	116	80	109							622
	536	2	103	267	73	753	31	19	502	1							310	147	349	116	58	162	109	125	200	167							128	484	135	176	317	759	0	118	44	58							472
	192	0	45	162	161	706	179	39	525	6							348	97	383	58	35	81	16	135	190	158							157	528	108	272	271	901	0	183	26	68							595
	112	2	162	216	64	615	192	10	519	1							563	203	377	52	31	49	29	57	227	142							259	472	83	330	316	727	27	118	75	86							573
	6	2	37	241	306	568	394	4	382	2							525	106	189	102	85	14	71	22	260	79							411	299	5	248	372	512	27	161	79	99							474
	65	4	181	159	114	715	493	15	414	1							114	73	416	74	110	7	37	98	304	118							363	395	25	157	421	534	0	289	118	130							534
	26	53	94	172	256	684	538	10	386	2							205	35	434	154	115	4	12	47	160	47							332	494	51	77	456	362	22	211	77	59							303
	53	77	49	68	160	710	481	5	443	2							228	39	337	196	76	24	43	69	154	103							198	455	95	90	676	337	65	172	16	111							315
	125	25	74	79	121	460	362	21	499	34							76	10	459	233	63	47	9	75	214	68							213	311	53	100	789	514	45	268	41	75							333
	180	31	110	104	171	448	244	4	515	139							141	22	525	231	86	87	11	52	356	68							209	327	61	103	826	472	88	180	89	63							141
	146	48	77	18	72	412	358	0	435	113							289	73	243	230	67	104	15	40	567	66							235	400	73	125	676	484	21	40	52	65							158
	235	24	203	68	137	556	430	0	320	108							271	177	211	257	113	107	36	34	447	46							276	238	46	147	280	357	37	86	20	63							328
	252	12	44	13	112	500	233	11	318	81							140	228	271	230	90	136	3	44	296	10							162	25	3	91	181	408	6	131	64	29							312
	201	34	6	22	44	407	300	3	310	49							64	235	265	239	93	230	1	32	341	39							91	69	5	21	119	331	71	114	19	32							248
	292	6	7	11	35	514	436	6	504	100							201	183	254	219	84	222	0	33	238	20							124	23	56	53	46	245	100	35	50	25							175
	203	2	0	0	4	609	396	31	544	112							196	269	328	154	56	203	16	25	164	13							135	12	10	21	163	239	65	118	56	19							243
	396	0	16	13	25	683	254	75	400	82							123	398	505	241	29	125	20	36	211	50							172	27	3	25	490	364	73	157	150	24							150
	240	0	60	21	33	665	429	44	591	85							298	197	604	211	90	128	37	53	256	28							243	165	13	56	408	533	217	131	97	33							174
	187	0	2	2	2	576	564	49	316	72							219	145	432	84	126	206	36	24	226	19							147	315	56	54	445	347	232	229	77	48							160
	191	0	33	4	1	463	426	25	428	188							190	205	237	206	181	151	40	35	123	57							143	332	63	92	386	402	211	242	19	56							229
	502	1	15	68	0	499	300	5	493	221							383	165	286	228	271	101	116	34	239	7							119	407	6	67	321	382	134	149	40	44							210
	128	1	4	68	0	413	317	18	483	175							177	184	267	190	202	108	136	20	312	22							110	429	0	26	508	210	108	112	28	86							59
	308	1	42	185	49	278	402	47	372	324							339	200	277	167	136	96	124	53	352	52							151	509	0	15	714	98	42	128	1	59							69
	250	0	22	249	64	64	432	36	452	60							189	250	342	166	77	153	142	81	352	20							148	483	0	84	1042	277	132	200	16	5							127
	253	1	8	97	44	142	369	51	421	42							318	315	372	160	74	105	127	63	348	33							67	433	0	64	1058	417	120	130	80	46							64
	531	0	0	96	130	239	278	7	448	73							250	365	381	108	56	129	177	48	252	47							47	397	0	7	1030	276	52	160	142	35							138
	449	1	0	43	108	298	249	34	419	91							305	335	410	152	96	202	206	78	181	40							12	399	0	1	848	393	196	199	102	38							74
	438	1	0	9	91	303	233	0	356	143							388	834	438	103	69	166	248	38	104	74							18	325	0	10	614	401	321	246	67	25							62
	570	0	0	88	211	248	210	0	344	130							229	747	491	132	8	152	104	53	139	61							64	317	0	4	591	365	317	282	46	15							72
	502	1	0	19	126	242	135	23	554	175							135	482	478	123	80	91	56	44	271	11							77	336	18	22	691	323	305	250	40	27							82
	278	0	22	22	184	340	298	0	354	244							255	279	251	128	34	63	47	29	199	8							30	180	16	11	711	334	185	229	38	21							105
	85	1	13	48	183	504	264	0	476	287							90	176	401	134	8	27	73	59	208	1							129	39	0	34	1067	327	135	227	178	5							82
	101	0	36	28	90	558	301	0	235	191							175	196	360	113	5	160	177	54	250	12							55	105	0	26	912	259	103	147	402	12							95
	85	22	2	109	37	401	480	0	74	94							132	667	341	141	3	137	138	28	350	41							109	343	0	31	768	157	53	87	417	34							54
	265	31	0	181	0	422	289	0	152	73							112	702	401	121	25	155	83	60	358	47							155	565	0	126	480	337	103	71	270	20							13
	610	23	0	220	2	502	103	0	269	107							89	483	308	82	0	174	78	27	252	9							105	587	0	90	560	527	86	149	77	6							87
	453	38	0	273	88	534	93	0	149	77							141	412	308	105	3	85	106	5	215	32							106	653	0	107	665	436	5	186	157	5							122
	276	30	0	134	0	560	107	0	307	24							107	537	286	81	12	111	113	39	195	19							22	522	0	71	785	293	68	115	137	8							43
	157	23	0	244	1	286	18	0	380	1							144	538	186	50	1	168	54	48	99	12							32	427	0	35	704	193	55	66	130	9							73
	79	29	15	201	0	79	42	1	453	6							57	608	89	25	30	162	56	2	110	0							72	443	0	97	590	227	2	61	263	20							77
	185	48	0	146	7	109	4	0	353	3							5	760	125	6	0	203	45	35	102	0							58	370	0	155	807	152	0	181	294	6							6
	60	2	6	230	59	294	25	1	156	26							71	662	337	101	0	201	102	34	81	1							145	337	12	166	600	117	2	183	321	31							52
	58	8	1	372	97	303	57	9	108	35							30	664	263	83	0	223	101	9	124	12							121	278	0	129	236	62	104	120	187	14							69
	69	12	0	98	52	427	82	0	383	0							17	432	281	14	2	167	25	48	127	14							93	241	0	137	303	161	95	54	135	20							61
	76	6	0	125	70	378	7	4	414	0							100	210	304	37	0	124	74	47	110	8							67	197	0	154	165	160	51	54	160	35							29
	103	1	0	147	163	177	104	10	521	1							0	235	332	28	0	124	20	5	147	1							104	131	0	115	180	291	19	57	156	39							86
	40	18	0	156	137	341	123	1	502	14							52	61	411	13	1	133	6	27	209	2							18	97	0	102	280	261	1	52	180	2							87
	87	7	1	222	31	279	121	2	355	25							15	14	376	5	0	146	2	41	84	1							182	98	0	131	423	300	34	122	283	0							104
	183	5	62	57	18	332	174	1	322	5							17	60	315	33	0	109	17	10	91	0							74	77	0	154	589	255	27	195	210	6							119
	178	1	48	289	7	423	173	2	176	64							26	129	245	9	0	48	16	0	84	0							118	58	0	16	453	254	15	55	64	6							86
	11	1	40	409	104	291	155	19	149	99							37	82	192	1	0	39	5	36	60	3							47	81	0	42	448	387	14	128	97	0							137
	55	0	109	543	75	284	153	49	168	124							30	74	140	3	9	141	0	18	96	0							66	33	2	61	474	356	48	15	142	5							176
	104	1	95	578	115	388	160	2	311	102							122	94	307	124	6	130	3	0	110	2							71	42	11	104	385	369	3	5	115	5							154
	279	0	139	345	137	284	81	22	241	65							99	89	269	179	0	87	12	26	89	1							53	85	0	163	259	104	15	9	111	6							39
	133	1	125	224	63	360	20	68	294	173							14	56	224	114	0	118	28	0	59	3							71	142	0	207	268	269	3	25	158	1							14
	486	0	118	228	146	350	46	1	220	290							179	117	376	127	1	130	6	3	195	2							16	113	0	184	365	234	1	21	83	4							140
	345	1	82	154	87	295	61	64	204	226							47	176	188	66	4	142	15	0	208	1							95	16	0	138	350	281	40	28	41	0							113
	298	0	74	297	32	347	121	50	228	134							66	133	192	126	0	121	9	8	164	0							23	24	0	131	312	345	13	62	64	0							95
	277	1	17	168	16	184	225	21	230	104							49	97	129	142	18	76	4	0	187	0							8	2	0	84	456	173	1	6	153	0							197
	433	0	32	103	1	227	265	67	123	139							326	32	127	170	13	168	6	4	224	0							19	10	0	51	533	248	28	15	113	0							97
	189	0	136	71	25	210	132	89	59	191							222	54	108	191	0	127	2	14	103	1							22	1	0	33	324	299	0	14	65	2							130
	120	0	134	56	8	364	121	89	92	286							89	88	49	205	8	80	0	7	132	0							69	2	0	38	211	356	0	1	61	0							68
	177	1	59	109	16	569	192	217	311	219							101	56	43	234	6	33	0	0	146	1							9	25	12	138	117	382	0	31	32	0							135
	105	1	78	58	35	670	154	129	203	228							263	305	22	172	6	135	5	6	173	5							36	40	0	110	96	452	2	17	20	0							79
	80	1	117	41	5	568	148	68	302	239							146	191	54	172	33	191	10	0	158	0							31	75	0	182	196	401	39	13	0	0							46
	96	2	166	120	3	417	210	85	186	216							142	19	74	258	0	165	1	0	51	11							89	7	0	271	242	258	2	5	28	0							11
	111	0	261	109	0	158	294	75	172	227							81	42	88	204	0	150	2	6	40	0							2	24	0	359	302	215	0	0	10	0							61
	72	0	243	84	0	201	297	116	395	296							36	33	57	62	4	32	13	23	50	2							38	33	0	221	265	207	0	3	1	0							80
	153	0	313	53	0	249	41	77	646	241							129	36	200	137	26	50	50	0	3	0							19	43	0	188	350	199	20	2	1	0							35
	84	0	367	98	0	252	72	142	359	137							117	58	314	98	9	105	22	8	0	2							0	19	0	206	200	147	0	5	1	0							47
	267	1	668	304	0	282	188	146	483	349							233	71	77	150	7	153	8	17	67	0							49	57	0	99	271	214	8	6	49	0							24
	131	0	421	199	0	321	138	91	546	119							290	122	87	115	2	83	11	3	37	0							57	3	0	191	222	151	14	18	50	0							47
	55	1	176	68	0	312	96	69	572	168							152	156	136	160	0	64	7	56	104	0							9	19	0	142	200	142	1	12	4	0							210
	120	1	101	24	0	202	85	82	666	97							91	73	66	89	0	128	6	69	16	0							10	35	0	98	267	62	1	12	18	0							107
	180	0	92	155	0	243	8	41	573	166							82	127	104	119	2	121	1	6	59	1							81	30	0	158	404	87	35	1	46	0							163
	302	0	59	70	0	112	19	57	651	126							95	59	47	52	0	138	4	57	56	0							34	79	0	131	315	41	31	16	10	0							61
	103	1	68	44	31	220	28	79	619	162							56	81	58	71	0	128	0	69	30	0							0	80	0	108	259	74	36	15	42	1							73
	380	1	58	330	323	294	51	80	399	136							153	125	192	74	0	87	13	42	75	0							42	43	0	63	243	60	17	5	39	0							8
	177	30	93	345	401	165	8	71	217	138							94	151	70	70	0	94	1	65	40	0							5	46	0	57	130	75	74	0	63	0							81
	117	54	40	145	306	266	3	24	99	163							192	95	100	95	34	138	21	103	10	0							29	95	0	54	141	92	95	3	56	0							158
	258	94	69	314	227	350	31	37	224	166							268	98	68	63	38	144	33	71	28	0							7	59	0	24	139	48	60	16	12	0							103
	265	134	38	62	201	211	9	62	450	172							86	56	68	92	5	124	9	46	0	0							36	10	0	60	283	26	0	15	46	0							42
	316	70	77	163	184	116	68	97	714	111							191	58	15	127	65	112	14	67	26	2							10	30	0	47	309	36	18	6	18	0							27
	300	91	116	215	127	38	51	77	559	96							123	45	148	155	155	162	83	10	286	2							33	28	0	42	216	65	4	4	71	0							68
	98	82	55	147	209	184	45	115	588	86							74	22	93	98	57	98	115	32	274	0							10	65	0	120	265	64	13	4	88	0							10
	73	123	46	51	264	280	52	83	480	108							242	38	76	49	119	21	49	39	309	0							19	80	0	46	146	61	9	8	73	0							56
	31	17	50	171	52	260	19	52	559	101							167	8	147	67	79	15	96	13	321	0							35	68	0	52	217	39	5	13	81	0							97
	7	163	78	210	110	236	35	75	439	63							83	34	196	12	173	94	41	29	253	0							13	42	0	40	231	59	11	12	26	0							75
	9	369	50	142	113	147	64	98	392	133							73	16	67	16	198	66	65	31	213	1							2	67	0	123	122	99	1	19	75	0							21
	13	123	13	222	201	201	40	93	175	117							227	29	217	26	173	1	78	3	160	0							23	80	0	213	177	97	0	3	14	0							31
	95	70	33	221	230	190	27	80	264	259							195	10	335	14	188	27	104	35	216	0							0	41	0	212	204	41	0	0	1	0							1
	210	80	41	221	211	139	7	97	182	252							143	8	378	8	135	43	118	19	199	0							2	19	0	249	84	23	4	2	2	0							4
	156	89	12	198	163	173	25	102	241	110							129	8	339	91	38	54	88	10	257	1							4	36	0	26	150	31	1	0	8	0							4
	167	51	6	222	108	198	103	24	530	164							208	1	505	77	70	64	61	6	392	19							7	33	0	122	166	27	32	2	55	1							2
	221	68	2	80	243	83	41	59	561	155							265	20	478	95	133	147	83	4	314	4							4	42	0	139	108	49	8	1	81	0							30
	103	96	1	256	246	53	29	48	406	267							263	4	341	121	42	132	169	29	435	29							26	28	0	282	83	8	6	0	34	0							12
	127	48	15	226	151	306	19	52	289	175							218	3	300	62	69	146	161	18	331	0							4	7	0	277	134	27	0	0	10	0							5
	185	40	53	227	151	202	10	121	157	238							241	7	75	113	104	46	118	41	177	0							10	12	0	46	133	54	0	1	0	0							20
	261	12	47	341	121	152	10	239	523	127							95	2	198	50	88	41	109	68	156	0							2	26	0	194	163	78	0	0	6	0							24
	269	54	110	181	122	127	25	328	607	19							98	15	271	36	95	80	190	36	152	0							0	1	0	143	241	120	10	0	9	0							1
	97	33	115	205	167	127	1	108	711	10							95	51	193	54	160	33	289	27	151	0							0	5	0	35	185	138	15	2	27	0							23
	97	19	8	281	92	156	2	127	760	95							51	123	112	78	124	56	319	17	192	0							3	4	0	94	167	11	19	2	82	0							3
	50	49	75	198	209	307	19	82	407	64							276	138	105	32	133	79	306	8	116	0							51	3	0	155	166	63	12	1	104	0							12
	54	10	38	343	157	175	15	9	237	65							69	92	277	43	164	39	278	6	63	0							62	6	0	100	103	96	9	0	138	0							13
	142	16	21	348	173	185	4	80	192	13							12	77	415	46	128	120	241	41	106	0							13	10	0	157	106	78	61	3	181	0							0
	202	5	109	298	189	152	7	69	252	118							53	86	167	117	72	99	207	31	154	0							75	1	0	197	135	105	60	4	140	0							5
	162	4	108	53	68	203	13	82	115	67							1	12	149	123	61	35	214	36	130	0							80	6	0	345	148	91	56	1	96	0							5
	160	12	105	59	88	236	9	86	79	75							3	43	294	52	195	10	147	26	101	0							63	0	0	308	88	45	136	2	42	0							5
	277	3	113	56	43	214	1	95	281	93							41	121	246	6	136	3	122	49	197	0							44	2	0	306	47	91	102	2	53	0							1
	280	1	65	103	59	296	50	141	164	60							16	14	235	63	8	10	143	60	198	0							42	47	0	172	96	58	146	10	29	0							0
	347	1	1	132	123	472	68	64	112	55							25	37	291	83	43	106	121	46	124	0							35	42	1	50	61	100	183	2	66	0							4
	92	1	68	222	80	333	34	70	105	64							4	6	80	75	132	79	61	47	119	0							39	63	0	124	11	72	138	0	100	0							0
	55	5	104	312	196	462	44	114	160	29							0	33	179	91	27	141	34	31	128	0							13	6	0	87	97	88	117	0	128	0							1
	139	6	4	373	242	201	30	76	326	63							28	101	314	44	25	151	49	8	163	0							25	14	19	55	94	16	145	2	173	0							0
	138	2	47	330	196	329	20	110	150	48							10	148	306	23	23	40	69	14	179	0							39	2	39	61	46	34	93	0	163	0							2
	164	0	34	254	217	255	10	130	238	63							9	7	249	18	33	62	26	2	63	0							5	0	107	118	0	41	79	0	207	0							11
	231	0	4	209	187	212	7	90	120	69							22	69	405	35	2	18	32	9	147	0							39	0	52	65	27	25	102	0	156	0							33
	150	1	55	177	154	331	3	113	290	19							25	1	341	100	48	16	31	5	161	0							52	64	33	32	57	6	96	1	251	0							7
	173	0	74	125	179	406	2	64	180	123							25	16	253	111	88	44	33	20	174	0							139	30	27	42	106	1	53	4	252	0							12
	113	0	11	113	90	444	8	89	28	63							37	65	241	24	29	9	24	21	267	0							234	81	62	37	32	0	100	4	213	0							12
	160	3	57	83	194	364	11	77	182	98							70	81	304	51	21	0	41	22	299	0							130	72	52	33	16	0	14	0	122	0							34
	279	1	76	129	147	462	44	49	192	122							89	40	273	75	67	0	45	2	375	9							109	72	21	4	20	2	63	0	93	0							1
	325	23	87	130	184	437	75	89	29	16							45	23	141	51	16	22	52	63	376	0							101	94	72	30	16	10	49	0	114	0							58
	204	43	68	174	212	303	54	51	31	34							3	1	105	77	71	4	21	118	328	5							77	41	61	29	12	19	59	0	172	0							71
	274	64	86	149	120	231	5	75	59	65							12	14	99	81	33	6	45	121	484	0							30	35	29	23	34	4	27	0	195	0							62
	203	69	70	143	125	165	4	82	59	147							15	37	333	39	73	24	39	83	474	0							49	106	39	41	16	39	42	0	176	0							14
	249	51	25	172	249	241	1	68	138	236							0	9	126	38	17	3	16	66	439	0							49	80	82	9	12	28	26	1	147	0							98
	403	7	26	185	318	446	6	95	18	41							0	56	215	55	0	2	25	74	340	0							143	6	123	1	41	1	12	0	174	0							182
	293	10	13	218	497	270	71	39	38	121							15	45	116	61	0	1	17	44	99	0							99	62	106	5	93	41	13	0	145	0							144
	157	9	16	123	442	177	77	81	147	151							18	49	181	40	1	0	30	70	230	0							145	9	96	107	83	28	1	0	110	0							265
	183	11	72	60	489	262	78	110	93	76							8	28	97	49	0	13	61	128	270	0							128	60	139	153	28	8	38	5	133	0							223
	259	25	86	50	539	192	80	119	373	111							9	43	93	23	0	29	71	54	369	0							36	31	18	150	62	50	53	1	78	0							74
	424	20	71	20	557	307	70	165	122	5							0	119	115	14	0	11	74	54	447	0							48	17	44	98	14	55	4	0	12	0							149
	529	67	40	91	428	128	7	130	95	10							0	123	28	69	0	50	38	62	423	1							92	17	41	63	0	36	3	0	85	0							39
	270	81	45	181	340	258	124	128	194	24							10	24	41	9	0	27	26	81	483	0							152	18	45	53	7	17	38	0	46	0							1
	393	83	56	155	300	143	65	164	121	35							3	4	36	82	0	0	1	90	433	0							261	43	72	50	0	7	35	0	45	0							7
	164	58	17	226	160	179	12	162	134	50							33	66	52	44	0	12	20	27	311	0							180	76	113	31	2	27	1	1	38	0							62
	112	74	18	233	84	93	114	135	220	36							29	93	20	92	1	7	60	18	434	0							65	47	55	27	0	52	10	6	9	0							144
	335	134	85	47	43	158	28	109	181	94							50	11	92	143	0	27	69	80	507	0							48	15	29	111	6	47	10	2	151	0							7
	322	113	105	51	218	301	43	90	517	94							41	45	27	32	0	32	54	42	439	0							72	50	7	20	7	17	25	0	114	0							56
	322	177	24	62	154	415	109	65	373	128							18	3	10	58	0	7	24	20	348	0							53	72	24	7	21	12	6	0	122	0							4
	369	39	51	21	96	498	99	101	348	27							11	0	38	109	0	0	20	14	275	1							46	94	34	12	65	15	0	0	116	0							3
	519	40	35	11	164	257	39	145	270	30							4	10	33	95	0	16	38	38	131	0							8	41	35	5	63	12	0	0	10	0							27
	373	56	126	30	112	143	74	93	257	23							93	0	23	131	0	21	31	127	144	0							26	64	42	7	12	7	2	0	21	0							7
	446	7	141	28	298	256	82	98	537	10							66	21	48	89	1	19	16	97	273	0							77	3	5	8	1	32	9	0	13	0							12
	171	13	116	13	337	119	76	93	655	18							5	75	11	84	3	1	24	106	218	0							52	0	4	40	34	4	4	0	0	0							13
	106	5	68	61	433	150	86	74	471	3							93	1	38	83	2	81	54	26	160	0							18	3	20	77	28	44	7	2	84	0							30
	67	8	62	33	414	133	74	138	467	8							8	15	53	98	1	140	32	15	254	0							116	6	33	4	13	7	8	0	165	0							2
	8	0	27	90	253	17	147	55	368	1							60	7	8	62	20	219	52	38	218	0							196	7	10	38	30	1	22	1	16	0							0
	24	29	45	196	106	34	195	64	324	5							12	20	60	119	41	233	50	18	436	0							160	49	45	112	4	1	36	0	103	0							0
	12	31	75	96	248	71	185	50	300	9							103	86	141	50	37	277	1	15	436	5							50	48	14	18	10	17	19	0	42	0							2
	12	24	118	229	242	138	162	130	573	2							104	142	141	130	44	295	16	26	290	0							11	17	8	26	0	21	2	0	27	0							4
	16	20	148	60	202	1	76	126	486	6							1	7	83	130	7	239	34	23	379	0							107	5	21	13	4	1	7	0	25	0							1
	50	23	209	87	120	130	26	7	482	17							182	62	87	40	11	152	48	27	311	0							80	0	2	93	3	11	7	0	26	0							11
	67	19	207	15	190	69	28	125	396	15							41	47	29	105	33	113	58	9	41	0							92	1	14	192	0	18	44	1	192	0							0
	47	35	119	42	150	26	43	164	402	45							21	15	1	114	16	145	40	28	291	0							62	0	8	184	2	3	3	0	239	0							0
	137	78	160	14	69	153	47	7	227	5							17	97	4	133	16	181	5	29	395	0							34	2	0	35	0	4	24	0	146	0							1
	144	19	192	1	119	89	77	38	365	9							14	88	4	155	20	171	16	11	561	0							40	0	0	40	0	0	4	1	142	0							31
	226	43	199	17	65	47	49	47	520	19							7	57	16	93	2	175	45	31	427	0							75	0	2	119	0	5	20	0	184	0							2
	429	86	228	104	147	225	67	128	590	20							0	36	10	120	7	147	33	0	368	0							74	0	6	130	0	0	4	1	256	0							0
	216	108	166	30	153	20	100	94	528	15							0	7	2	104	63	167	2	2	280	0							64	0	13	119	0	6	3	0	173	0							8
	400	12	78	21	121	120	96	95	458	29							2	63	1	137	96	173	1	4	393	0							3	0	27	81	0	2	3	0	42	0							1
	326	38	153	4	141	108	18	17	727	5							2	72	0	224	37	181	27	0	213	0							6	0	7	69	1	2	11	0	73	0							4
	353	23	222	13	106	217	50	63	860	1							6	116	0	198	97	213	17	2	214	0							13	0	0	75	6	4	3	1	59	0							6
	300	75	221	51	102	307	50	103	710	82							7	8	1	225	67	242	14	4	237	5							49	4	1	50	0	1	12	0	5	0							1
	307	64	230	198	25	318	77	103	519	132							0	80	0	218	19	218	24	8	479	41							55	1	0	77	0	1	0	0	17	0							0
	275	18	195	389	3	202	59	59	304	25							0	89	0	142	59	170	2	5	408	115							3	0	1	95	0	0	5	0	21	0							20
	295	13	204	447	2	303	66	218	350	6							56	44	6	68	82	96	16	6	318	120							40	0	0	142	0	1	13	1	1	0							1
	582	6	175	271	20	224	92	174	357	9							44	108	24	133	26	124	0	7	441	56							29	0	5	145	0	8	11	0	1	0							0
	603	16	43	232	7	14	109	108	520	8							64	84	16	188	32	111	0	0	334	94							14	0	7	105	0	4	0	0	7	0							3
	396	13	111	115	62	77	117	152	629	90							37	57	33	205	33	284	8	0	188	102							5	0	26	121	0	3	0	3	0	0							7
	171	7	168	138	3	143	142	108	641	262							65	27	60	46	22	244	2	0	110	2							46	0	20	184	0	2	0	8	6	0							15
	216	16	86	38	0	91	151	85	541	293							227	0	63	135	36	67	13	0	229	29							40	0	33	182	1	1	3	1	0	0							0
	258	5	194	93	0	37	42	26	529	280							269	54	60	85	68	139	7	0	211	13							99	0	12	194	3	2	12	0	0	0							5
	221	22	189	27	0	35	121	19	264	382							239	39	54	96	2	159	3	5	174	5							132	0	23	208	0	2	7	0	0	0							2
	167	5	163	3	16	88	151	8	155	268							295	0	47	201	98	104	20	1	194	7							102	0	2	86	1	0	0	0	4	0							4
	106	0	97	44	12	21	60	9	272	209							210	6	15	124	18	76	27	1	105	4							18	0	39	116	0	0	1	0	38	0							16
	139	8	209	20	224	52	122	29	371	210							260	12	7	179	24	67	18	0	323	85							48	0	1	177	0	4	0	0	149	0							18
	290	12	210	72	251	70	89	124	486	124							156	52	32	171	10	51	25	0	242	111							61	0	3	220	0	3	15	0	122	0							0
	220	12	105	11	183	21	93	59	494	250							284	5	78	169	44	74	37	0	294	159							26	0	5	101	0	3	3	1	68	0							0
	63	1	97	149	172	10	102	123	342	173							283	57	49	197	33	58	13	2	334	150							27	0	0	63	15	12	4	2	17	0							11
	82	13	118	84	174	30	22	96	536	150							148	55	70	182	1	86	36	9	403	145							98	0	2	32	55	36	2	0	4	0							8
	124	0	28	59	148	9	35	61	461	104							100	19	29	105	92	103	4	13	374	113							93	0	1	22	12	22	20	2	17	0							5
	171	2	17	65	111	84	55	46	422	111							52	75	42	130	7	132	27	1	136	126							37	0	0	92	13	15	22	3	42	0							3
	114	5	36	4	99	246	82	2	687	141							70	13	45	65	2	129	23	38	363	79							39	0	0	147	8	47	18	1	29	0							0
	76	0	149	71	161	425	75	0	605	157							305	4	12	7	34	206	23	23	215	30							17	0	0	29	58	60	0	0	138	0							2
	105	3	189	12	33	340	145	35	486	37							137	20	40	53	101	218	24	9	325	41							140	0	0	33	19	19	4	0	91	0							0
	242	1	135	5	107	307	149	76	339	55							424	0	17	0	95	190	0	27	225	85							98	0	0	4	39	8	0	0	18	0							2
	102	0	129	32	132	403	125	58	701	152							485	0	25	3	121	152	15	7	370	32							155	0	0	0	22	6	0	0	45	0							4
	104	1	214	14	128	372	167	112	368	166							432	0	93	29	136	167	1	0	282	19							157	0	0	38	20	10	19	2	5	0							0
	102	1	211	0	143	226	108	74	485	66							479	1	78	43	45	207	3	0	251	32							87	2	0	102	18	27	3	0	18	0							0
	182	0	128	0	73	445	234	48	191	130							300	0	28	5	71	343	7	4	55	68							167	52	0	160	28	22	0	1	68	0							0
	124	0	27	3	111	425	204	85	199	87							217	2	18	102	148	302	0	0	138	21							75	52	0	58	13	1	14	0	137	0							8
	182	2	65	17	58	195	170	56	667	152							106	4	10	79	20	352	6	0	49	24							123	42	0	73	5	8	20	0	16	4							0
	95	1	21	5	6	219	140	76	722	152							120	1	66	39	23	336	3	0	64	2							117	3	0	45	7	5	43	1	93	0							2
	152	0	35	48	3	374	97	86	613	51							232	0	56	37	68	258	11	0	87	0							36	0	0	13	5	2	27	0	101	2							14
	178	1	94	125	10	338	159	50	459	70							371	0	6	87	56	240	5	0	118	1							120	10	0	0	7	6	46	0	97	0							1
	31	0	95	122	163	344	251	37	443	59							452	0	22	82	104	272	3	0	228	11							12	6	0	6	6	16	23	0	254	0							1
	153	0	103	245	761	217	125	16	342	34							261	0	32	144	57	235	3	13	78	51							193	24	0	43	17	0	107	0	117	8							5
	114	4	59	350	680	96	77	2	485	42							224	0	28	119	92	214	5	23	338	84							96	46	0	100	18	19	107	0	269	24							0
	378	7	97	381	588	149	116	7	433	7							192	0	46	17	19	207	0	2	149	65							101	52	0	199	12	4	99	1	159	61							4
	381	9	117	629	397	28	89	80	489	23							220	2	15	52	95	304	7	10	141	105							173	36	0	180	16	1	94	0	150	56							26
	630	3	169	611	464	67	122	40	494	0							57	48	10	76	111	359	0	4	147	95							64	75	0	192	16	0	94	0	136	3							0
	680	1	143	406	461	179	103	74	253	2							54	45	13	190	64	426	2	3	156	53							9	14	0	79	3	0	102	0	70	25							0
	478	7	64	452	296	103	53	30	434	2							81	19	29	230	113	484	0	0	131	109							20	18	0	75	0	1	111	0	45	60							7
	357	39	19	127	316	106	103	15	543	1							50	0	68	249	75	381	0	0	97	96							14	0	0	100	0	0	82	0	61	4							6
	178	81	72	158	223	309	158	28	619	1							251	0	63	203	94	297	6	2	23	22							68	52	0	36	0	1	58	0	85	61							0
	169	39	209	55	194	209	111	27	695	0							133	0	59	168	169	198	0	22	183	85							8	62	0	88	0	1	16	0	120	16							1
	410	80	254	36	254	164	154	5	683	0							246	0	72	160	83	222	0	15	123	135							100	14	0	93	0	2	35	0	113	10							0
	337	97	116	189	119	68	25	44	622	0							262	23	45	116	198	221	10	2	134	24							26	24	0	92	0	0	125	0	137	10							0
	595	20	70	154	233	56	42	63	628	0							132	1	34	174	170	198	5	2	159	37							21	67	0	50	0	0	97	1	193	38							0
	537	31	106	182	236	37	61	64	268	0							203	37	12	174	27	227	20	15	391	8							12	89	0	46	0	0	32	0	257	15							5
	518	85	47	236	162	57	26	71	309	0							104	41	32	107	22	155	23	31	370	14							38	70	0	87	8	0	52	0	324	17							3
	448	63	137	301	109	60	58	8	395	0							42	24	39	98	86	139	5	53	136	8							88	99	0	66	13	0	45	0	292	19							3
	511	71	248	263	160	40	76	139	641	0							165	34	27	146	88	41	29	81	234	2							39	39	0	82	2	1	18	0	224	38							0
	584	145	109	189	188	44	135	153	322	0							193	29	17	214	116	165	1	55	215	0							2	10	0	127	0	0	5	0	232	70							6
	720	81	16	210	118	54	210	179	236	0							140	17	25	179	8	220	33	56	79	1							11	25	0	115	0	0	16	0	206	17							1
	547	104	38	315	173	73	213	123	283	0							188	49	58	107	127	186	9	54	380	0							18	28	0	142	0	1	59	0	142	8							2
	279	109	118	448	120	43	182	158	292	0							96	49	41	112	32	308	81	15	445	0							93	37	0	157	0	4	144	0	166	9							0
	334	101	154	443	42	15	217	131	145	0							138	75	12	12	51	341	59	0	297	0							71	50	0	159	0	1	127	0	158	13							1
	243	89	58	416	37	106	152	109	321	0							326	83	11	40	53	128	41	15	252	0							40	49	0	207	6	2	80	0	210	12							0
	203	103	154	834	47	14	146	130	593	0							173	62	60	97	80	194	42	14	335	0							20	93	0	180	0	2	52	0	42	17							3
	108	69	101	524	93	4	237	122	420	0							199	79	20	122	86	151	62	16	202	0							7	68	0	184	0	1	132	0	7	1							2
	379	28	115	214	160	8	355	91	275	0							215	113	42	144	171	152	19	1	184	1							40	25	0	59	1	2	115	0	0	3							0
	510	48	89	547	174	5	329	84	524	0							109	92	70	179	85	223	84	4	341	0							89	55	0	39	0	6	57	0	5	2							3
	522	55	96	426	199	1	240	66	310	0							256	123	146	135	34	500	54	1	106	7							148	54	0	142	1	3	59	0	52	22							1
	361	85	90	243	241	6	166	56	537	0							306	130	82	123	44	624	134	4	157	0							123	73	0	37	17	5	90	0	286	7							0
	321	99	117	214	402	4	139	25	861	0							309	20	48	115	0	488	233	12	173	0							116	50	0	21	28	16	36	0	308	20							0
	561	147	199	305	611	6	111	9	1041	0							375	88	79	101	109	218	316	4	580	0							28	4	0	30	5	46	56	0	357	5							0
	641	128	20	333	552	27	97	5	1036	4							224	36	120	121	110	133	251	23	508	0							37	10	0	72	6	56	82	0	283	19							0
	607	120	128	373	404	132	162	37	560	0							351	49	118	63	34	176	299	0	371	0							14	17	0	37	1	76	88	0	257	8							0
	640	222	178	336	392	281	188	28	727	2							344	72	171	122	41	203	143	0	274	0							2	1	0	85	1	52	104	0	217	0							0
	432	128	130	194	395	281	179	68	772	0							311	46	242	121	84	179	274	0	277	1							51	9	0	111	0	42	33	1	153	13							4
[truncated: 104 more columns]

## Sheet: Motion traces_G3
	G3_Trial1																G3_Trial2																G3_Trial3																G3_Trial4
	Mouse 1	Mouse 2	Mouse 3	Mouse 4	Mouse 5	Mouse 6	Mouse 7	Mouse 8	Mouse 9	Mouse 10	Mouse 11	Mouse 12	Mouse 13	Mouse 14	Mouse 15		Mouse 1	Mouse 2	Mouse 3	Mouse 4	Mouse 5	Mouse 6	Mouse 7	Mouse 8	Mouse 9	Mouse 10	Mouse 11	Mouse 12	Mouse 13	Mouse 14	Mouse 15		Mouse 1	Mouse 2	Mouse 3	Mouse 4	Mouse 5	Mouse 6	Mouse 7	Mouse 8	Mouse 9	Mouse 10	Mouse 11	Mouse 12	Mouse 13	Mouse 14	Mouse 15		Mouse 1
	807	122	13	105	817	312	391	186	141	764							0	199	30	202	31	29	647	212	327	387							0	0	13	2	12	0	163	320	283	41							0
	797	40	29	81	750	416	233	146	357	701							0	299	69	164	60	61	600	229	310	277							0	0	47	68	11	0	159	285	281	47							0
	944	67	31	11	338	361	177	74	317	547							1	242	52	217	62	21	384	142	296	57							0	0	27	2	0	0	230	297	251	15							0
	802	52	30	99	237	124	208	146	373	471							1	348	23	202	65	32	515	176	384	118							0	0	42	46	1	0	275	374	171	7							0
	564	76	23	21	207	198	126	16	312	359							0	290	28	186	70	91	549	168	164	166							0	0	11	24	29	0	181	408	147	16							0
	419	104	50	127	383	369	333	27	109	386							0	241	172	162	31	114	365	117	321	374							0	0	45	102	6	0	187	513	95	92							0
	393	138	37	56	447	285	123	18	297	454							2	183	431	146	102	143	656	71	538	168							0	0	56	44	46	0	143	539	70	79							0
	407	221	51	147	433	124	340	4	768	481							3	179	482	72	144	146	468	75	495	94							0	0	2	163	4	0	220	541	316	36							0
	602	271	25	112	551	244	198	7	950	447							0	145	548	42	138	174	219	58	374	267							0	0	32	118	5	0	193	377	190	37							0
	753	268	1	53	419	114	369	2	983	432							1	125	324	69	56	189	300	21	239	289							0	0	0	165	0	0	197	354	97	40							0
	751	275	44	182	229	23	149	10	610	555							0	113	338	92	76	174	214	54	292	122							0	0	57	171	0	0	449	321	124	62							0
	680	223	152	166	425	45	102	11	422	397							0	12	442	134	85	117	166	153	342	78							0	0	29	201	40	0	448	248	72	64							0
	426	215	367	92	367	26	84	11	293	313							6	56	340	143	56	113	621	115	174	84							0	0	1	279	0	0	397	264	361	89							0
	563	188	340	321	228	25	32	17	178	164							1	163	395	196	34	158	240	62	286	173							0	0	1	190	39	0	350	288	184	216							0
	853	202	211	357	149	17	84	3	164	180							33	80	222	216	81	164	464	150	207	186							0	0	32	89	4	0	345	293	120	255							0
	735	196	268	233	284	4	80	0	287	234							6	23	214	211	93	190	170	169	102	230							0	0	40	179	0	0	225	306	91	281							0
	467	265	247	309	261	62	263	1	204	412							1	12	164	254	79	307	507	298	220	335							0	0	79	256	1	0	196	316	99	215							0
	420	253	117	332	310	106	358	8	100	441							0	58	267	272	138	287	837	502	115	265							0	0	106	352	3	0	259	263	211	183							0
	179	249	279	339	293	155	444	1	237	399							0	94	304	228	78	225	363	444	73	42							0	0	108	430	11	0	207	334	68	219							0
	110	252	380	395	186	109	381	3	365	355							0	125	347	278	49	215	582	432	75	283							0	0	108	364	2	0	159	282	81	309							0
	315	325	639	286	101	105	388	6	350	664							0	150	241	178	108	149	649	342	10	345							0	0	51	339	8	0	141	257	71	371							0
	355	306	894	310	35	65	388	0	199	1020							0	126	236	151	88	110	397	383	117	187							0	0	19	297	9	0	147	302	89	426							0
	284	230	859	292	54	279	170	2	113	858							0	60	277	151	144	82	334	458	94	118							0	0	30	254	0	0	237	279	64	282							0
	289	185	1010	142	127	344	89	0	46	686							0	69	242	186	83	132	381	481	85	228							0	0	48	316	0	0	250	238	146	96							0
	531	102	825	355	35	237	146	9	95	750							0	67	227	104	67	267	910	445	20	308							0	0	24	302	0	0	297	225	85	97							0
	1068	71	601	403	56	320	107	0	136	839							0	22	232	89	93	184	1613	569	197	142							0	0	25	387	0	0	409	244	9	130							0
	937	42	553	430	188	228	93	0	161	625							0	62	234	57	55	177	1785	303	408	168							0	0	23	474	0	0	304	190	45	63							0
	435	28	402	306	251	43	79	32	180	596							0	177	332	71	76	102	1881	307	555	110							0	0	15	418	5	0	447	179	25	98							0
	670	12	644	185	16	236	113	266	332	657							0	386	402	33	74	112	1727	81	714	6							0	0	6	476	2	0	346	158	57	80							0
	888	38	712	176	208	449	82	316	331	849							0	537	243	113	69	135	1581	97	728	97							0	0	16	399	0	0	255	140	35	131							0
	808	109	980	259	167	412	48	294	252	1036							0	499	150	118	93	171	1288	309	691	110							0	0	12	119	0	0	246	150	18	156							0
	925	206	1142	164	89	423	12	296	307	713							0	177	102	198	85	138	1308	315	708	92							0	0	8	123	0	0	326	125	0	273							0
	945	426	955	102	5	358	8	244	233	957							0	102	52	193	79	145	936	98	680	23							0	0	31	224	0	0	299	43	79	279							0
	961	658	677	97	1	199	19	177	343	768							0	87	51	274	61	216	894	170	792	0							0	0	38	219	0	0	374	73	124	290							0
	756	777	919	75	147	373	26	85	177	615							0	189	28	322	110	324	893	380	577	23							0	0	38	146	21	0	343	25	4	142							0
	668	553	1145	50	10	419	16	92	250	685							0	286	18	132	30	297	557	772	703	2							0	0	58	123	5	0	265	26	67	148							0
	729	352	1431	48	27	504	21	55	171	647							0	318	10	162	169	225	530	730	604	21							0	0	37	140	6	0	239	34	34	132							0
	979	325	1319	3	65	728	28	90	214	461							0	327	12	165	68	189	459	741	335	542							0	0	4	48	3	0	200	10	0	137							0
	887	504	1041	33	32	602	36	90	86	192							0	294	44	76	86	255	348	462	464	393							0	0	0	44	0	0	301	16	25	164							0
	614	275	821	32	23	594	23	97	41	488							7	223	81	80	100	280	270	275	701	326							0	0	0	78	0	0	188	21	5	134							0
	534	245	662	21	30	459	32	181	121	521							1	182	34	112	107	226	239	155	639	347							0	0	2	113	0	0	280	8	2	98							0
	541	210	787	5	188	458	11	195	43	572							1	89	4	61	87	193	54	190	673	113							0	0	0	62	25	0	144	87	1	149							0
	784	129	765	20	138	503	5	178	28	551							1	101	9	91	58	381	16	213	660	66							0	0	0	114	80	0	227	34	3	139							0
	524	100	291	17	15	463	7	151	49	358							0	147	11	130	79	237	74	77	746	15							0	0	2	137	95	0	213	31	26	29							0
	385	74	331	21	38	491	5	132	86	715							0	75	27	121	93	275	130	52	909	69							0	0	15	117	66	0	259	4	0	58							0
	689	137	636	36	94	691	28	15	45	768							0	121	12	106	104	298	168	146	993	87							0	0	52	197	35	0	328	53	16	70							0
	754	194	468	59	17	656	53	83	31	866							0	47	13	88	28	333	68	145	940	52							0	0	6	238	8	0	355	36	11	115							0
	271	74	586	86	109	446	34	302	20	471							0	31	4	84	96	361	61	244	721	155							0	0	8	209	10	0	452	3	1	12							0
	367	65	274	19	1	547	19	156	15	847							0	51	1	25	42	500	199	332	503	270							0	0	0	193	3	0	472	25	0	29							0
	413	45	209	70	0	721	37	115	1	417							0	52	27	38	152	433	126	388	232	156							0	0	0	177	16	0	284	75	9	64							0
	272	68	202	51	88	516	32	47	25	872							0	24	0	96	56	242	93	334	615	290							0	0	0	191	8	0	243	46	13	12							0
	377	111	260	45	0	377	20	140	27	802							0	50	1	139	75	269	27	207	642	326							0	0	0	206	12	0	263	79	0	109							0
	706	87	501	123	1	507	35	230	25	699							0	33	0	40	129	186	32	116	758	214							0	0	1	209	11	0	210	73	14	51							0
	889	42	527	124	37	263	91	362	15	759							0	104	2	32	59	156	46	126	884	353							0	0	5	143	2	0	185	6	0	28							0
	795	101	388	159	73	633	133	301	2	442							0	79	0	89	43	73	103	223	863	417							0	0	2	63	24	0	229	40	0	20							0
	876	68	660	250	72	789	78	245	73	469							0	27	0	7	41	68	126	170	820	369							0	0	1	139	77	0	297	90	8	63							0
	517	88	503	234	279	628	94	112	53	192							0	11	0	90	59	72	81	35	712	385							0	0	0	112	100	0	275	54	6	12							0
	565	134	581	125	155	698	77	75	12	131							0	6	0	3	114	170	53	72	855	358							0	0	1	124	53	0	304	12	22	8							0
	344	75	515	64	64	834	80	13	16	345							0	22	0	27	155	322	4	56	763	303							0	0	0	93	6	0	204	5	0	5							0
	251	115	369	131	158	765	111	308	15	588							0	33	11	14	113	270	67	21	543	396							0	0	0	60	0	0	119	81	2	53							0
	360	52	167	155	160	763	135	348	89	702							0	10	102	40	103	289	30	7	413	422							0	0	0	13	0	0	104	113	9	128							0
	442	55	175	159	28	689	130	325	34	743							0	16	92	107	77	199	120	65	442	511							0	0	0	146	80	0	89	48	33	68							0
	337	200	43	161	170	507	226	361	13	821							0	2	53	24	107	215	121	82	297	393							0	0	0	121	171	0	29	90	0	38							0
	160	179	109	227	205	454	304	393	25	865							0	5	16	36	128	221	133	44	410	396							0	0	0	54	98	0	10	59	5	23							0
	452	77	326	248	39	473	234	354	24	843							0	5	49	43	77	247	71	20	340	505							0	0	0	71	84	0	91	75	0	28							0
	307	81	334	227	79	615	278	436	34	723							0	0	22	3	126	214	64	76	67	403							0	0	0	140	87	0	11	45	0	187							0
	361	37	561	369	102	847	272	351	31	582							0	0	52	6	176	214	31	2	205	556							0	0	0	78	44	0	60	28	0	218							0
	593	158	714	316	70	723	200	503	40	430							0	0	126	1	120	219	31	4	194	465							0	0	0	13	57	0	51	12	0	166							0
	520	196	1031	290	84	668	86	675	65	238							0	0	177	19	106	106	139	55	48	261							0	0	0	14	46	0	43	24	0	214							0
	518	112	1301	241	128	643	90	750	25	91							0	1	383	48	105	161	130	2	28	583							0	0	0	136	60	0	32	1	0	169							0
	272	164	1131	225	241	554	109	692	13	10							0	0	372	1	63	65	109	47	102	522							0	0	0	184	44	0	29	0	72	75							0
	436	278	632	161	188	452	153	603	32	25							0	0	521	31	202	262	140	59	168	382							0	0	0	189	21	0	24	0	305	85							0
	164	210	334	183	84	420	289	422	88	74							0	0	579	17	79	84	125	15	175	467							0	0	0	212	19	0	20	0	350	40							0
	306	230	264	198	82	453	337	202	5	144							0	0	389	100	47	27	69	10	148	339							0	0	0	186	36	0	20	0	395	37							0
	217	129	551	248	196	184	342	129	6	128							0	0	405	116	92	125	137	38	115	248							0	0	0	170	28	0	13	0	311	24							0
	450	187	691	194	236	165	265	106	42	105							0	0	511	62	153	27	106	75	44	392							0	0	0	181	15	0	11	12	356	5							0
	656	277	819	200	139	186	330	252	30	79							0	0	422	63	198	60	77	38	218	385							0	0	0	150	54	0	9	107	272	21							0
	492	237	741	185	141	135	424	773	17	243							0	0	379	166	162	40	36	75	314	322							0	0	0	95	8	0	32	55	218	64							0
	606	216	672	213	161	75	332	942	19	359							0	0	471	155	87	72	48	137	440	437							0	0	0	72	6	0	16	144	278	34							0
	528	272	549	163	156	48	302	637	11	391							0	20	554	84	115	159	63	86	496	363							0	0	0	119	2	0	5	34	224	40							0
	366	266	241	195	171	68	227	580	41	468							0	40	521	52	183	67	88	102	468	256							0	0	0	214	4	0	7	37	277	34							0
	396	287	222	151	247	75	116	670	67	365							0	17	523	52	173	114	107	98	371	117							0	0	0	251	46	0	31	135	338	29							0
	299	330	843	62	222	136	132	626	60	320							0	18	440	97	173	116	90	179	273	224							0	0	0	303	41	0	12	174	328	20							0
	89	364	1335	72	106	49	123	592	44	575							0	20	428	67	131	59	44	44	422	255							0	0	0	319	48	0	26	148	293	39							0
	60	391	1619	20	288	85	23	409	26	505							0	9	448	197	167	173	40	40	287	212							0	0	0	273	96	0	1	127	266	121							0
	113	316	1719	18	203	100	67	312	106	246							0	9	373	204	23	218	28	82	591	295							0	0	0	308	62	0	8	120	308	89							0
	25	238	1262	68	124	175	80	395	31	350							0	9	349	255	92	248	18	76	1024	149							0	0	0	359	42	0	2	226	401	129							0
	50	157	970	69	6	261	12	440	46	433							0	17	320	137	56	130	20	19	801	159							0	0	0	390	1	0	21	232	357	97							0
	34	199	671	20	14	296	13	476	14	377							0	5	410	82	116	129	2	33	744	72							0	0	0	411	10	0	35	142	380	158							0
	15	152	402	11	145	250	6	532	12	265							0	2	276	65	61	32	0	24	494	31							0	0	0	349	14	0	6	204	246	169							0
	26	95	344	76	87	365	49	578	54	213							0	34	385	120	144	107	0	1	648	87							0	0	0	219	2	0	13	166	169	229							0
	14	91	236	41	9	412	56	660	23	287							0	43	416	157	139	78	0	33	830	86							0	0	0	173	6	0	14	79	150	188							0
	28	72	208	35	33	610	56	712	18	431							0	17	314	292	151	44	0	5	979	56							0	0	0	175	7	0	0	229	202	136							0
	65	59	126	10	1	612	158	912	3	587							0	9	273	275	140	178	0	10	759	77							0	0	0	121	3	0	17	134	128	146							0
	87	86	149	20	29	597	205	1106	19	737							0	2	176	273	112	215	8	2	700	19							0	0	0	139	9	0	47	220	138	109							0
	27	90	212	24	79	773	207	978	11	667							0	11	170	287	175	230	24	23	628	35							0	0	0	126	6	0	10	134	192	152							0
	19	66	300	62	8	758	211	1233	20	735							0	0	220	232	166	166	65	20	449	81							0	0	0	84	0	0	14	76	104	117							0
	43	86	440	95	76	843	153	1538	84	963							0	0	126	142	186	218	46	1	503	45							0	0	0	110	1	0	40	30	111	37							0
	24	39	555	107	74	917	176	1277	140	961							0	1	146	274	151	387	25	33	472	19							0	0	0	144	3	0	64	41	166	70							0
	40	22	742	61	26	1098	130	1568	90	815							0	0	71	357	209	367	105	2	698	17							0	0	0	58	0	0	62	73	182	29							0
	13	25	851	29	14	825	28	1865	62	779							0	0	195	293	169	325	156	33	707	60							0	0	0	69	1	0	119	82	314	25							0
	33	10	892	8	68	1249	146	1414	181	514							0	0	244	172	167	392	137	17	624	34							0	0	0	23	0	0	80	96	417	114							0
	57	6	465	12	33	969	112	994	145	353							0	0	437	134	117	405	76	68	622	34							0	0	0	98	0	0	7	84	500	167							0
	29	34	585	21	29	1178	166	1241	67	379							0	0	375	225	93	387	34	86	590	20							0	0	0	199	0	0	7	94	440	232							0
	23	53	415	74	47	1100	391	841	93	363							0	0	172	162	157	414	70	31	670	19							0	0	0	111	0	0	2	60	371	150							0
	48	32	254	36	0	540	558	796	50	292							0	0	272	176	189	217	157	62	696	38							1	0	0	191	3	9	29	28	290	130							0
	10	31	177	50	13	604	756	631	143	135							0	0	167	129	242	338	151	27	696	49							0	0	0	179	9	0	13	28	348	85							0
	85	81	229	98	4	681	661	533	63	57							0	0	202	58	189	222	227	120	527	27							0	0	0	67	1	1	13	5	307	193							0
	76	160	347	71	6	978	376	456	79	128							0	0	147	73	191	109	399	1	504	48							0	0	0	136	0	3	36	16	340	164							0
	26	272	328	35	2	933	360	491	7	331							0	0	223	166	187	25	363	76	686	15							0	0	0	121	0	14	68	1	407	216							0
	21	289	267	18	15	607	248	427	28	513							0	0	245	114	186	142	574	77	540	82							0	0	0	72	0	1	18	23	303	131							0
	48	371	310	27	0	434	366	327	39	493							0	0	169	185	407	159	491	105	593	86							0	0	0	45	76	0	38	27	218	172							0
	33	334	279	60	22	306	451	264	21	387							0	1	159	233	493	201	548	12	653	296							0	0	0	37	182	19	12	3	258	114							0
	24	270	178	82	1	771	216	104	8	319							0	7	68	287	407	205	499	2	547	52							0	0	0	39	187	10	50	2	412	48							0
	17	363	137	145	0	732	205	220	1	350							0	5	28	268	494	164	702	24	645	157							0	0	0	30	134	25	47	7	232	41							0
	76	199	155	93	18	795	176	315	12	361							0	1	60	174	397	150	616	86	647	179							0	1	0	62	144	0	9	61	254	43							0
	23	397	130	117	0	1269	127	246	38	553							0	5	98	221	476	188	642	90	909	131							0	9	0	141	118	0	5	79	345	49							0
	55	418	156	157	11	883	123	35	8	564							0	4	130	139	427	65	488	44	833	85							0	9	0	115	186	2	43	63	205	20							0
	56	390	191	156	3	864	78	133	10	591							0	2	114	200	344	26	335	59	879	31							0	12	0	170	139	0	22	22	299	40							0
	85	269	229	209	3	924	42	24	15	247							0	10	119	133	415	50	489	48	875	37							0	3	0	165	143	0	28	30	336	73							0
	14	295	360	218	8	943	131	47	13	459							0	8	402	158	240	93	249	5	894	25							0	7	0	109	174	0	0	25	249	99							0
	46	341	443	241	21	958	171	60	18	506							0	1	798	244	444	207	294	21	741	168							0	29	0	110	178	1	1	12	195	5							0
	5	272	488	188	12	912	260	162	9	441							0	10	1130	210	470	67	273	2	847	45							0	34	0	105	176	1	8	4	301	12							0
	70	224	603	187	91	541	193	406	31	581							0	6	1438	157	305	161	518	14	758	21							0	25	0	28	109	1	7	1	323	42							0
	35	289	588	258	164	434	246	371	0	575							0	0	1438	104	237	165	180	9	745	1							0	5	0	57	7	1	2	0	263	25							0
	60	290	759	115	206	410	421	180	7	545							0	0	1214	84	237	63	327	12	636	2							0	24	0	50	23	1	29	0	281	20							0
	29	283	922	100	208	381	610	80	46	290							0	12	906	69	501	117	263	9	659	81							0	50	0	41	0	16	50	0	149	102							0
	1	209	797	144	276	445	647	52	60	211							0	4	857	137	389	250	570	15	744	1							0	69	0	44	1	4	60	0	153	88							0
	92	174	857	180	281	397	659	91	50	184							0	0	693	231	389	86	254	2	695	2							0	43	0	76	16	1	19	0	173	226							0
	113	222	504	220	369	355	808	178	27	99							0	0	456	184	560	90	267	9	670	10							0	10	0	48	35	20	29	2	292	233							0
	96	84	421	222	312	361	1076	128	14	118							0	8	209	54	541	124	319	9	475	1							0	37	0	61	9	38	28	33	266	295							0
	70	118	431	348	185	72	1196	111	15	74							0	6	77	99	412	103	210	7	607	46							0	25	0	28	17	7	77	35	138	333							0
	109	256	515	305	185	340	1265	117	8	257							0	3	88	146	142	52	334	8	1105	40							0	9	0	43	36	10	32	39	112	254							0
	42	444	361	303	109	230	1017	112	18	213							0	28	166	113	44	33	511	5	1160	95							0	72	0	19	10	5	85	60	67	140							0
	115	313	280	230	160	434	1057	418	4	28							0	3	222	93	203	140	473	3	1021	19							0	55	0	56	11	19	25	61	95	160							0
	8	283	126	195	182	461	918	179	11	50							0	4	110	153	59	66	71	13	1200	31							0	16	0	64	107	3	34	33	94	82							0
	62	273	49	144	106	788	745	369	24	105							0	25	122	144	117	75	278	43	1031	47							0	45	0	32	106	14	50	8	178	109							0
	63	81	130	255	373	886	662	395	6	96							0	27	138	106	368	17	247	16	690	58							0	76	0	107	65	6	3	2	231	75							0
	93	108	178	364	436	717	517	411	52	106							0	29	182	136	404	31	292	1	676	259							0	68	0	50	48	7	56	19	163	99							0
	78	179	127	365	409	878	543	317	73	184							0	23	160	142	350	95	326	28	778	388							0	14	0	33	45	1	133	114	120	57							0
	113	184	143	393	533	1048	655	134	107	164							0	17	193	68	205	189	244	27	1206	269							0	64	0	25	3	5	91	53	90	90							0
	94	86	100	254	454	970	537	141	32	114							0	22	100	47	277	217	249	3	1313	198							0	121	0	7	35	26	224	0	93	62							0
	66	53	180	267	413	613	594	296	42	135							0	13	47	145	100	200	240	4	1094	141							0	166	0	4	24	49	206	14	78	101							0
	28	11	202	187	241	450	479	392	114	77							0	12	62	178	192	140	256	37	947	462							0	223	0	39	41	27	289	115	157	73							0
	55	44	130	193	161	629	357	296	30	211							0	2	40	186	94	42	235	19	875	483							0	195	0	2	14	17	364	109	225	73							0
	45	29	98	275	335	766	441	193	54	338							0	13	93	170	22	79	260	41	870	578							0	152	0	8	6	27	520	107	141	85							0
	151	147	163	374	397	942	410	191	96	139							1	6	108	60	41	127	164	32	982	449							0	129	0	0	44	63	223	111	140	37							0
	40	225	384	152	711	1118	408	243	11	219							0	3	63	129	100	210	191	15	1073	664							0	139	0	0	36	43	97	106	198	65							0
	72	185	618	189	950	1385	285	256	27	352							0	5	74	148	136	273	300	36	1044	690							0	204	0	2	121	14	98	47	227	61							0
	43	143	797	158	845	1294	176	178	5	204							0	23	37	236	78	275	329	43	1155	797							0	127	0	26	155	14	74	34	262	38							0
	78	97	793	39	555	931	226	228	29	416							0	16	178	223	14	256	402	56	738	769							0	140	0	9	178	12	18	8	235	18							0
	40	136	700	39	368	1034	167	189	68	310							0	7	252	127	4	147	565	93	706	317							0	130	0	63	117	3	204	3	361	3							0
	110	138	486	152	376	982	135	186	54	97							0	13	195	154	4	217	325	121	739	152							0	106	91	47	120	6	19	45	348	35							0
	55	163	488	293	573	908	124	177	25	210							1	35	87	152	10	141	249	141	704	222							0	121	174	3	106	42	115	9	243	48							0
	30	245	465	391	568	923	127	59	109	159							0	3	175	99	3	168	253	172	547	358							0	135	102	2	121	5	2	1	52	41							0
	64	268	496	370	572	887	80	44	141	120							0	30	162	129	117	227	315	237	957	350							0	78	32	0	41	51	74	3	162	70							0
	43	227	315	403	487	1036	50	117	197	27							0	17	149	93	94	235	344	174	866	418							0	91	37	0	48	13	29	5	79	42							0
	119	199	509	379	317	1058	24	154	63	62							1	27	55	128	78	155	169	308	1012	649							0	92	74	0	70	2	60	34	65	53							0
	154	144	620	324	511	993	88	88	87	33							0	6	121	53	116	134	262	322	961	666							0	96	32	2	6	11	90	7	150	48							0
	81	151	657	203	816	850	67	135	95	114							0	28	256	26	107	151	314	213	1026	494							0	55	68	67	26	4	13	48	67	49							0
	101	166	616	250	1086	901	27	106	146	80							2	2	338	69	191	156	392	239	857	403							0	88	113	28	34	24	23	24	88	39							0
	57	166	541	267	1216	686	18	47	142	116							0	10	336	20	137	139	410	229	911	600							0	208	89	112	9	12	1	42	47	62							0
	26	261	419	305	987	600	10	52	113	34							1	10	314	76	91	85	358	166	834	735							0	182	30	101	13	12	20	90	139	60							0
	80	248	299	499	373	586	18	58	111	55							0	13	326	192	80	93	238	159	998	679							0	154	17	86	0	33	38	83	157	63							0
	88	244	97	308	283	613	12	86	164	132							0	39	271	297	9	75	243	44	976	586							0	146	22	6	1	38	128	72	211	29							0
	169	188	133	269	134	449	7	48	109	176							0	25	231	236	86	77	370	143	746	477							0	104	1	3	13	8	65	36	167	10							0
	107	162	114	408	89	530	2	95	27	179							0	7	316	132	85	22	527	144	652	447							0	84	16	18	25	5	41	84	157	20							0
	88	162	80	408	169	523	4	122	18	142							0	42	249	184	125	70	345	132	734	403							0	85	37	76	3	1	212	80	231	36							0
	65	366	138	401	233	555	9	82	46	94							0	21	314	99	142	72	284	160	631	354							0	106	28	20	51	0	112	85	202	8							0
	86	337	101	258	351	291	3	43	26	162							0	13	315	74	50	51	314	54	954	475							0	139	3	8	43	1	88	87	98	5							0
	53	369	70	152	360	375	3	5	28	210							2	6	305	41	94	19	355	175	1145	215							0	193	6	69	30	5	143	31	244	9							0
	88	305	59	136	336	370	6	17	21	209							1	25	359	86	69	111	301	114	814	87							0	151	61	36	86	11	134	106	216	14							0
	53	314	84	21	163	94	15	9	13	123							1	4	330	107	33	91	166	120	1203	143							0	105	12	45	16	10	259	47	327	19							0
	93	264	125	36	136	287	0	13	9	88							0	50	299	119	3	31	263	104	1418	404							0	92	21	23	0	2	290	93	280	0							0
	118	299	185	117	139	114	7	40	1	114							0	23	348	75	2	18	217	27	1274	452							0	47	33	30	0	1	256	79	172	62							0
	118	155	163	111	204	271	1	2	17	105							0	13	325	52	1	13	182	87	959	535							0	31	1	6	94	0	190	80	146	78							0
	65	155	86	64	390	62	0	12	0	110							0	25	282	38	13	63	295	124	1247	387							0	40	62	4	142	1	192	124	203	31							0
	24	199	26	169	271	25	14	1	4	143							0	16	269	9	36	42	378	119	1319	216							0	28	24	18	124	0	221	112	185	44							0
	117	306	21	104	67	71	4	46	14	124							0	27	273	63	45	73	305	264	727	107							0	21	4	6	33	0	176	89	201	37							0
	43	308	85	64	158	146	4	50	5	36							0	10	299	159	97	48	549	308	1131	300							0	24	5	16	2	0	173	132	104	24							0
	73	417	218	129	192	37	16	37	82	10							0	13	266	167	44	13	584	337	825	130							0	13	9	90	0	0	259	92	241	28							0
	60	471	173	102	59	163	7	14	32	97							0	4	306	108	0	130	472	395	468	170							0	26	2	61	115	0	228	81	229	34							0
	161	481	64	105	129	82	1	33	64	114							0	14	367	134	2	199	438	421	679	90							0	14	51	1	268	4	162	75	163	12							0
	186	276	55	49	189	213	9	117	100	60							0	2	289	82	43	269	506	345	1334	129							0	11	61	8	235	0	332	138	69	32							0
	100	67	11	228	55	176	14	143	67	100							0	0	273	108	7	401	452	253	1108	113							0	6	14	6	230	0	182	117	56	59							0
	65	253	24	226	55	372	45	74	95	106							0	19	317	165	51	494	212	197	676	133							0	3	13	0	267	0	222	175	51	21							0
	137	535	83	345	25	329	92	84	31	99							0	34	199	156	2	416	309	130	389	190							0	16	12	7	151	0	407	110	45	19							0
	159	666	94	336	12	381	11	19	57	243							0	8	223	150	15	441	248	151	1091	554							0	32	28	5	109	0	532	81	28	0							0
	28	612	201	305	28	144	14	39	155	182							0	37	210	151	23	388	168	184	1033	786							0	16	41	12	47	0	305	144	34	25							0
	72	616	180	125	325	124	34	99	153	162							0	11	311	30	12	413	183	219	648	1034							0	14	12	35	93	0	415	164	19	33							0
	76	787	189	113	258	157	1	128	83	113							0	6	235	31	39	459	134	166	981	870							0	7	53	2	13	0	292	182	54	19							0
	30	979	141	283	368	52	46	189	2	76							0	19	90	42	43	391	214	122	1186	982							0	1	7	11	3	0	201	109	74	0							0
	21	1064	12	203	315	189	57	188	6	107							0	11	90	42	27	305	118	74	1066	811							0	4	1	19	25	0	163	162	156	1							0
	32	840	64	98	311	63	32	158	21	97							0	8	185	71	31	341	331	141	1185	722							0	6	0	13	25	0	58	163	211	13							0
	35	679	9	160	179	65	9	199	11	92							0	11	291	40	7	256	574	135	1354	554							0	0	0	52	64	0	30	174	262	25							0
	178	708	12	69	161	29	51	310	22	165							0	17	351	80	2	186	479	103	1150	215							0	0	1	93	66	0	65	208	382	23							0
	193	694	75	114	152	147	117	377	7	227							0	12	377	132	0	150	378	24	831	194							0	2	8	23	44	0	120	269	374	7							0
	74	485	7	240	101	86	170	353	19	177							1	57	418	29	4	304	378	39	570	319							0	5	12	35	77	0	159	271	315	6							0
	89	422	0	66	163	57	361	374	6	179							13	12	272	54	14	527	272	23	626	381							0	9	26	8	40	0	223	170	217	5							0
	58	445	0	68	210	154	495	402	2	128							93	3	261	86	24	733	133	27	535	341							0	22	1	25	37	0	197	177	158	5							0
	126	470	10	34	165	247	594	338	122	169							80	44	326	181	15	716	109	52	403	223							0	10	0	0	19	0	151	140	227	0							0
	120	452	2	132	175	474	451	338	86	192							45	12	278	140	20	599	230	13	150	342							0	32	0	0	220	0	52	52	269	12							0
	30	220	1	211	277	652	332	388	186	147							50	20	364	116	31	432	155	18	254	349							0	30	0	1	252	0	45	90	284	56							0
	144	169	32	230	238	641	349	343	64	105							51	24	381	12	25	257	92	17	96	114							0	12	0	1	37	0	67	84	221	30							0
	328	360	17	79	73	624	277	139	22	260							29	10	364	52	25	208	207	10	87	447							0	24	0	15	80	0	62	109	81	53							0
	243	325	3	119	71	693	331	106	7	190							61	5	340	92	22	315	241	31	173	367							0	41	0	0	189	0	42	127	247	26							0
	171	211	0	153	80	413	482	209	25	101							82	0	354	16	19	445	481	45	251	171							0	11	0	8	108	0	122	190	262	14							0
	201	343	109	73	57	250	614	182	5	176							28	8	289	33	51	551	379	21	170	123							0	41	0	1	114	0	37	194	197	10							0
	172	423	126	60	56	283	626	136	71	238							2	23	295	12	0	598	240	5	304	332							0	29	22	1	196	0	38	133	158	23							0
	121	535	166	42	41	485	607	286	103	237							44	6	436	57	3	603	195	9	204	459							0	7	22	11	203	0	4	207	100	19							0
	129	471	173	72	106	296	412	187	19	93							9	36	582	40	21	541	151	35	289	499							0	25	0	75	250	0	94	129	117	10							0
	145	559	326	104	201	656	394	134	8	53							49	10	539	28	12	498	140	20	287	312							0	8	5	57	111	0	25	197	84	22							0
	192	552	326	98	247	677	332	92	1	63							50	21	606	29	0	557	142	32	317	359							0	24	0	9	175	0	64	233	33	28							0
	222	466	446	5	252	647	230	147	5	83							62	18	457	35	16	547	140	10	227	451							0	40	0	54	100	0	14	220	175	20							0
	306	387	456	64	252	795	239	162	28	81							43	3	426	8	10	516	200	8	492	169							0	24	0	0	144	0	0	204	212	48							0
	299	263	447	55	227	758	351	204	7	80							66	34	501	1	1	473	194	7	618	94							0	10	16	16	139	0	46	195	35	40							0
	226	258	510	3	260	914	152	175	0	280							65	15	383	5	3	426	232	21	573	143							0	42	16	0	175	0	10	182	92	57							0
	97	216	297	63	320	742	127	152	6	165							16	26	280	1	37	289	310	69	1003	108							0	39	0	42	98	0	39	86	94	56							0
	98	418	301	28	379	714	47	127	25	247							16	8	531	13	22	155	246	66	1151	102							0	18	1	37	47	0	18	102	85	48							0
	141	504	381	29	321	544	43	154	41	237							1	6	729	23	36	165	174	44	1226	268							0	8	0	34	50	0	21	60	109	5							0
	367	780	452	22	382	662	192	134	4	223							2	1	854	0	49	131	146	32	956	241							0	8	0	19	93	0	73	20	75	25							0
	395	955	496	18	424	574	144	384	3	237							10	7	865	0	67	206	142	36	849	285							0	7	0	7	132	0	46	141	126	18							0
	282	830	405	81	442	573	211	568	14	301							53	44	962	2	41	140	117	8	563	475							0	8	0	0	72	0	1	61	33	31							0
	153	773	459	149	214	725	230	501	10	354							91	22	946	4	54	82	117	7	302	341							0	33	6	9	69	0	19	285	106	10							0
	219	678	729	17	181	454	274	349	3	361							71	9	550	13	65	44	88	38	431	205							0	6	1	4	58	0	32	229	151	19							0
	610	759	1078	103	135	522	337	292	0	304							103	40	724	13	43	6	15	49	384	157							0	24	0	3	32	0	27	91	53	28							0
	675	894	1010	19	186	479	391	332	1	247							33	27	692	1	50	227	15	78	446	389							0	42	0	40	61	0	13	81	21	20							0
	563	709	716	69	190	170	489	555	64	209							14	7	777	1	83	563	35	120	479	251							0	11	0	49	75	0	3	107	40	15							0
	713	500	718	59	89	289	224	565	65	245							12	10	650	5	59	612	37	166	725	167							0	25	0	44	146	0	7	88	2	0							0
	425	452	476	3	100	284	177	403	3	259							133	12	546	24	67	738	63	223	822	25							0	34	0	8	106	0	2	203	15	18							0
	509	511	672	66	71	99	119	347	3	169							150	21	690	16	95	795	48	247	859	93							0	66	3	8	69	0	0	99	10	32							0
	223	620	656	58	61	374	113	163	150	141							123	49	832	0	145	650	40	201	705	497							0	48	1	2	51	0	14	86	24	3							0
	320	553	511	105	77	91	200	69	73	141							42	39	794	2	118	626	15	229	713	414							0	28	12	8	60	0	0	82	26	1							0
	65	435	789	7	132	89	661	175	14	142							28	6	758	0	120	533	18	246	773	439							0	25	0	88	52	0	5	78	45	7							0
	216	377	866	15	77	107	939	184	30	218							77	47	761	0	63	470	13	211	664	263							0	13	26	94	97	0	26	72	27	0							0
	307	431	688	49	23	55	1300	282	6	370							25	9	676	0	33	531	17	238	638	292							0	14	9	5	124	0	56	126	119	46							0
	244	220	752	19	7	71	1060	355	0	359							110	8	672	0	89	541	22	207	495	380							0	23	4	12	113	0	108	132	9	34							0
	264	149	940	41	74	19	1015	291	72	412							49	14	901	21	60	593	1	122	481	422							0	2	2	30	56	0	110	46	65	7							0
	421	138	841	16	93	3	804	433	31	469							87	17	747	36	141	624	38	151	768	509							0	23	0	114	131	0	72	144	21	3							0
	761	231	741	117	74	82	626	440	3	438							135	17	789	7	284	704	66	236	548	358							0	57	2	18	182	0	173	5	3	8							0
	657	230	580	78	119	119	649	435	139	456							55	44	727	15	64	642	28	479	347	710							0	12	6	28	135	0	315	104	8	46							0
	411	282	368	16	78	132	444	468	51	547							35	26	489	1	3	339	64	594	287	631							0	4	0	31	93	0	310	171	10	32							0
	384	199	209	3	45	149	268	332	71	557							20	36	667	1	2	344	49	663	386	277							0	13	0	22	99	0	326	210	0	29							0
	369	181	225	53	17	135	122	354	176	580							44	27	672	1	0	344	41	650	314	157							0	15	34	65	171	0	289	211	0	23							0
	614	236	331	238	71	202	137	507	104	411							143	8	449	1	0	262	17	559	346	183							0	1	0	13	297	0	185	109	2	2							0
	600	238	553	139	64	100	234	467	149	397							102	34	382	7	0	349	9	373	466	490							0	5	4	77	107	0	97	95	0	9							0
	774	238	580	174	12	83	260	446	119	283							75	22	496	17	0	341	23	168	542	369							0	20	6	157	90	0	206	114	0	0							0
	810	264	639	168	22	373	304	444	107	258							92	29	424	8	0	353	0	146	335	232							0	33	0	216	111	0	350	46	2	7							0
	878	243	758	160	159	629	449	347	118	257							97	19	645	0	51	184	25	154	381	267							0	20	1	251	192	0	424	115	0	50							0
	446	178	852	198	292	711	563	433	11	292							122	6	687	2	204	147	12	185	319	201							0	40	0	168	139	0	458	49	0	34							0
	688	207	1256	167	339	735	817	249	72	231							172	36	1039	27	62	87	28	223	252	264							0	33	0	148	125	0	371	149	0	27							0
	740	333	1234	184	438	731	755	278	68	195							129	20	929	0	171	192	11	222	85	131							0	54	0	130	193	0	412	100	0	0							0
	528	155	1025	232	489	741	784	320	127	219							131	29	874	8	22	223	6	205	204	177							0	87	7	118	158	0	238	98	0	3							0
	417	104	925	54	666	959	894	222	115	234							188	11	794	0	71	256	8	113	201	169							0	67	2	198	175	0	128	184	0	6							0
	226	89	996	25	791	739	775	150	333	205							121	1	626	0	56	302	11	114	329	187							0	90	1	260	151	2	243	97	0	26							0
	266	106	921	15	643	556	927	125	399	76							161	26	362	8	0	283	60	105	169	61							0	85	0	206	69	1	329	68	0	10							0
	168	188	819	69	790	507	859	313	411	130							193	8	88	89	51	347	73	157	214	36							0	113	0	157	96	0	340	78	0	5							0
	231	110	893	219	745	453	536	719	605	270							158	30	88	97	1	213	37	101	246	159							0	79	0	68	51	1	423	102	0	7							0
	121	31	956	220	827	372	287	508	566	246							145	11	41	45	0	275	36	155	319	121							0	140	27	105	139	4	280	109	6	0							0
	206	69	1007	69	711	360	300	391	403	171							83	27	53	15	28	127	48	74	288	158							0	72	17	78	23	21	303	146	0	0							0
	153	78	1037	91	782	370	133	362	488	101							112	42	79	10	0	71	37	141	303	310							0	25	5	76	32	3	272	204	0	0							0
	140	76	842	34	487	361	198	402	386	158							190	8	163	6	0	205	52	180	511	274							0	16	12	22	109	0	313	171	0	0							0
	91	12	570	40	806	363	207	383	294	100							240	31	119	6	33	230	58	194	579	217							0	68	6	110	57	0	466	121	0	0							0
	93	35	245	38	709	216	258	161	323	104							239	5	76	48	1	460	53	114	348	315							0	8	0	119	79	1	606	218	0	31							0
	161	17	316	16	722	139	290	109	507	27							185	9	43	61	100	499	24	48	464	387							0	63	1	65	68	3	492	141	11	13							0
	149	22	114	18	806	104	307	246	494	39							173	10	154	38	69	531	18	98	428	407							0	53	1	33	95	0	449	97	44	7							0
	225	9	202	59	834	70	416	246	448	71							207	24	273	1	62	512	51	52	363	384							0	20	1	45	116	5	323	89	39	1							0
	279	11	506	108	821	171	209	231	450	150							137	18	328	4	132	494	79	52	340	395							0	33	14	30	17	0	380	49	26	5							0
	192	12	538	52	712	148	198	252	376	84							148	40	335	7	40	352	17	46	315	424							0	51	0	37	38	0	389	41	29	0							0
	248	3	540	45	800	155	143	322	456	95							190	42	393	5	40	265	19	155	281	447							0	59	0	5	69	0	379	59	95	0							0
	314	24	677	58	781	65	320	215	329	19							146	22	371	26	0	171	55	58	299	536							0	91	1	23	17	2	310	11	136	0							0
	160	2	614	39	699	45	436	77	227	14							145	36	236	5	82	177	55	69	365	424							0	143	8	51	28	0	190	99	86	0							0
	208	105	555	31	632	142	546	171	100	52							86	23	238	0	130	91	84	34	281	181							0	150	2	30	30	0	263	103	197	0							0
	302	2	563	57	959	152	511	89	272	30							50	2	154	2	47	196	11	118	253	108							0	240	6	51	2	1	236	287	264	0							0
	555	18	673	72	1136	52	293	121	420	71							87	16	313	1	192	185	78	87	200	266							0	175	5	62	7	3	117	124	273	13							0
	587	24	681	0	921	321	145	150	416	119							102	13	196	20	212	160	145	105	382	255							0	201	0	29	2	1	121	227	352	22							0
	533	182	514	19	1103	172	173	153	299	137							129	16	420	53	326	266	205	156	226	111							0	55	0	46	0	0	99	273	315	35							0
	530	122	610	10	1203	135	199	235	61	80							108	50	396	149	155	341	181	169	354	49							0	88	0	87	25	0	60	272	246	57							0
	896	358	565	74	884	44	276	374	195	129							70	21	387	130	115	374	178	174	660	10							0	148	1	119	18	0	93	181	364	35							0
	1019	301	529	120	755	96	286	460	290	199							40	36	541	82	95	228	213	188	643	200							0	60	0	121	9	0	83	74	284	54							0
	1062	222	482	29	885	127	239	347	269	299							52	34	545	91	88	293	368	240	256	122							0	91	0	127	15	0	34	79	221	85							0
	1007	280	382	27	839	89	204	445	121	398							64	44	485	24	83	386	364	246	342	37							0	87	3	137	50	1	60	62	232	147							0
	1182	272	307	9	622	139	223	527	103	421							105	27	385	122	6	377	310	182	452	60							0	133	0	170	19	0	14	40	146	194							0
	1260	164	303	42	997	250	209	254	172	438							116	20	374	147	29	281	334	187	397	31							0	91	3	156	71	0	50	39	78	157							0
	477	84	323	34	478	439	189	195	134	438							57	5	526	123	0	198	208	202	419	81							0	176	0	143	36	0	7	132	181	137							0
	364	46	311	90	697	451	190	201	132	364							48	24	644	104	6	234	367	265	298	24							0	145	0	148	24	0	13	91	299	267							0
	698	80	151	118	795	453	212	222	47	369							35	1	597	7	24	424	542	219	118	32							0	83	0	153	38	0	0	64	342	223							0
	592	37	138	34	1021	306	190	215	141	422							78	10	683	39	13	497	592	177	79	77							0	77	0	213	32	0	25	119	352	165							0
	406	52	187	77	1233	224	206	213	146	406							26	3	644	50	0	467	430	211	54	31							0	87	0	57	87	0	23	163	399	187							0
	372	235	342	46	1306	273	261	381	110	325							18	8	378	40	0	397	240	216	168	38							0	103	0	49	85	0	13	121	207	120							0
	581	226	422	41	1218	76	319	342	70	327							92	13	245	31	7	166	184	262	73	112							0	75	0	102	1	0	8	52	223	63							0
	469	23	447	48	1207	222	286	218	57	352							95	5	253	9	0	198	156	194	55	31							0	84	0	91	17	0	6	38	275	85							0
	520	165	447	14	853	268	283	312	207	389							113	15	321	16	173	186	161	218	187	68							0	75	0	46	6	0	98	85	313	93							0
	430	30	408	75	520	254	287	229	147	251							99	10	366	0	331	162	101	235	354	77							0	17	0	46	9	0	137	96	252	183							0
	320	21	300	4	499	188	174	334	202	295							38	3	293	47	425	222	14	370	356	20							0	34	0	6	35	0	39	33	271	293							0
	481	7	386	39	344	118	84	347	299	311							7	16	243	91	308	281	79	286	168	29							0	44	0	2	57	0	50	41	336	309							0
	489	22	451	87	151	183	159	350	189	305							6	4	193	36	369	280	53	296	29	20							0	74	0	127	46	0	41	38	312	413							0
	257	15	419	21	195	65	243	200	194	210							32	1	49	35	398	329	11	316	141	44							0	72	0	144	120	0	49	37	212	412							0
	441	14	452	18	495	44	137	174	339	169							32	1	21	15	127	249	128	359	78	74							0	72	0	144	163	0	13	22	173	298							0
	619	5	642	52	453	134	116	97	401	145							25	12	27	7	209	168	293	512	73	5							0	43	0	117	160	0	1	8	321	205							0
	825	38	608	111	45	179	398	148	307	130							31	2	80	10	41	232	448	443	193	37							0	55	0	102	170	0	35	13	281	293							0
	630	38	598	35	145	117	307	361	450	44							51	9	12	30	93	263	487	450	121	198							0	23	0	103	174	0	19	15	297	235							0
	269	57	709	182	524	171	194	392	491	187							28	0	59	29	24	248	560	450	134	222							0	32	0	49	142	0	10	9	70	232							0
	445	23	869	186	622	40	179	299	296	148							25	3	16	78	12	173	667	481	83	235							0	56	0	54	229	0	18	5	249	210							0
	159	125	877	192	648	140	154	314	216	262							7	8	36	46	0	310	671	365	110	238							0	66	0	41	137	0	14	155	318	160							0
	138	22	782	198	648	83	120	190	112	204							14	27	18	0	0	371	671	390	178	87							0	50	0	25	115	0	33	192	53	217							0
	528	144	791	218	787	129	74	250	77	216							13	10	39	1	15	384	568	275	111	171							0	106	0	21	94	0	3	103	403	208							0
	365	93	722	211	800	77	151	286	94	226							38	6	51	82	215	324	585	235	5	216							0	89	0	27	10	0	28	70	384	166							0
	663	11	841	328	761	157	196	359	216	136							93	3	39	1	336	468	630	398	12	115							0	93	0	72	36	0	28	100	351	67							0
	263	75	650	424	550	165	201	423	396	294							73	10	38	34	279	452	515	461	19	215							0	122	6	61	48	0	0	72	282	96							0
	532	207	477	241	391	100	357	438	217	329							35	12	22	84	281	349	330	319	1	281							0	84	3	6	83	2	1	49	224	70							27
	789	313	468	261	670	54	193	456	383	309							62	33	40	0	272	311	307	235	25	217							0	41	0	37	100	0	14	132	275	81							3
	490	575	510	249	717	21	352	441	366	362							2	18	25	37	228	204	259	198	2	224							0	18	0	39	8	0	1	48	310	134							36
	607	466	298	222	670	164	397	439	205	308							7	15	1	59	178	188	240	81	0	177							1	21	0	5	3	0	16	53	277	112							29
	564	571	237	188	598	287	363	495	156	278							11	10	0	5	262	204	272	186	148	91							0	25	0	1	13	0	97	34	235	102							45
	666	602	299	68	712	198	395	609	89	344							24	2	7	50	269	306	387	272	698	260							1	7	0	1	17	0	80	95	240	82							20
	636	528	484	100	587	95	508	739	66	486							58	15	1	66	211	470	620	289	801	290							0	0	0	0	28	0	12	58	260	71							16
	407	698	366	136	542	187	503	786	48	519							2	5	7	0	278	409	743	323	879	273							0	0	0	0	12	0	48	30	211	110							61
	567	585	335	150	101	270	350	555	4	578							1	48	6	0	287	272	863	149	969	290							0	0	0	0	8	0	53	45	37	69							34
	468	618	322	205	248	436	359	818	0	657							69	68	18	8	226	218	1191	269	982	397							5	3	0	0	0	0	11	35	88	143							9
	407	405	432	191	307	395	354	1037	0	713							121	42	3	11	99	107	1371	249	841	451							2	3	0	0	4	0	22	87	7	180							15
	381	287	407	218	223	326	259	879	0	395							74	32	1	22	181	141	1320	81	452	354							2	11	0	0	0	0	64	4	0	180							24
	360	106	365	143	193	204	288	932	0	262							53	21	12	12	71	8	936	65	187	246							1	0	0	0	0	0	9	11	0	93							20
	337	189	318	10	433	13	392	897	0	148							15	51	0	63	66	28	937	19	172	247							0	5	0	0	1	0	2	35	0	105							40
	438	120	408	224	391	36	573	884	0	38							27	45	1	81	69	57	775	31	102	269							2	0	0	1	0	0	0	103	1	68							18
	327	123	364	324	305	62	574	1057	0	59							0	10	0	0	68	219	724	31	108	206							3	0	0	0	0	0	0	39	0	84							36
	213	6	251	318	185	13	633	886	0	5							0	10	0	2	0	264	709	57	53	46							3	0	0	0	0	0	0	9	2	74							35
	257	31	206	300	75	37	660	973	0	21							0	5	0	0	1	136	794	36	19	94							13	0	0	0	0	0	7	3	1	74							17
	289	47	154	338	146	0	552	1429	5	32							0	5	0	7	22	247	859	23	5	105							10	0	0	0	0	0	68	2	0	39							4
	253	111	68	285	90	0	550	1074	286	27							0	0	0	61	0	232	657	29	1	317							34	1	0	0	0	0	3	0	0	61							1
	144	77	54	155	7	0	434	1044	253	54							0	0	0	172	24	375	479	11	2	309							42	0	0	0	0	0	52	55	0	93							0
	130	36	58	206	41	2	358	748	230	183							0	0	0	125	0	340	389	4	2	133							14	0	0	0	2	0	19	91	0	82							0
	52	4	70	122	5	3	357	982	208	205							0	2	0	98	0	176	219	2	10	74							1	2	0	0	136	0	4	27	0	57							1
	154	56	18	226	1	3	277	1122	219	262							0	0	0	104	0	170	145	88	0	128							0	2	0	0	256	0	78	44	0	115							7
	241	0	8	133	39	4	64	934	127	295							0	1	0	142	19	165	64	200	0	197							5	15	0	0	163	0	67	5	5	32							9
	250	0	9	153	2	25	88	941	65	208							18	1	0	119	0	198	120	304	0	204							10	10	0	0	105	0	94	4	0	73							28
	177	15	46	84	71	34	102	820	239	214							17	38	10	60	19	224	202	347	59	153							37	37	0	0	107	0	108	69	8	31							35
	215	51	353	16	0	125	47	968	277	225							4	109	113	66	7	166	282	292	66	251							56	104	0	0	202	0	31	134	9	114							20
	273	93	493	14	3	216	1	759	211	181							2	93	100	221	60	130	303	305	41	408							26	155	0	0	275	0	61	100	5	242							27
	322	19	402	4	55	177	298	984	139	114							0	31	31	159	77	153	307	314	15	498							49	122	0	11	299	0	1	83	1	224							71
	412	46	215	0	3	197	293	972	132	92							0	18	61	134	31	292	342	354	7	556							1	63	0	68	291	0	1	151	1	233							78
	427	71	164	0	42	109	185	637	38	68							0	25	63	154	113	426	223	354	82	733							82	14	0	40	342	0	47	162	0	111							32
	532	11	170	2	1	58	246	977	5	147							0	24	174	143	81	307	185	329	22	580							129	7	0	45	240	0	17	109	0	47							8
	540	1	160	0	47	199	189	965	7	65							0	35	28	146	9	271	169	458	33	375							114	46	0	87	163	0	50	105	1	22							9
	540	3	272	7	0	107	197	967	238	143							0	15	0	291	68	201	151	621	157	346							67	23	0	51	160	0	11	134	1	21							2
	608	27	338	0	31	190	271	840	340	135							0	73	33	252	0	189	91	642	27	385							110	23	0	32	138	0	0	109	0	64							25
	562	2	383	5	119	234	332	1100	304	158							0	70	44	87	74	221	42	464	244	244							59	3	0	19	281	0	0	92	0	96							2
	841	1	221	19	337	188	383	1121	310	166							0	24	147	141	0	201	7	321	221	430							3	6	0	33	156	0	11	120	0	163							5
	795	23	78	238	326	151	461	846	279	166							0	62	48	97	4	172	3	280	379	543							6	11	0	38	116	0	13	113	0	67							1
	708	18	90	161	145	126	579	1032	227	165							0	12	16	120	82	147	13	266	609	440							41	34	0	61	87	0	12	54	0	54							0
	608	11	76	106	44	62	404	1292	205	171							2	0	0	85	94	29	2	259	642	162							6	15	0	40	41	0	12	136	12	22							0
	482	5	74	69	82	44	278	1100	137	91							0	1	7	27	8	29	0	142	329	283							41	1	0	9	44	0	34	235	9	50							0
	303	2	4	37	52	67	183	898	66	110							0	7	0	93	112	23	1	218	31	335							50	2	0	20	34	0	6	126	1	142							0
	461	15	6	38	17	19	30	724	5	26							0	3	1	72	7	3	1	275	70	315							60	0	0	6	60	0	1	93	1	134							0
	267	0	0	50	69	14	48	336	4	42							0	5	0	199	125	8	0	309	79	215							101	0	0	4	39	59	0	78	0	131							0
	187	35	2	6	108	5	38	696	5	137							0	0	0	135	75	6	0	426	214	128							154	0	0	1	0	92	43	83	0	51							0
	209	0	3	23	1	0	9	358	0	131							0	1	0	113	59	2	0	349	386	298							124	0	0	18	0	41	37	158	0	53							0
	435	27	0	0	4	1	19	180	0	61							0	0	0	137	150	0	0	496	487	170							146	0	0	30	0	42	6	163	0	73							0
	456	37	0	3	0	5	5	600	0	49							0	0	0	237	202	8	0	426	862	195							65	0	0	15	1	47	21	125	0	257							0
	301	89	0	0	0	0	11	758	0	95							0	0	0	227	217	2	0	582	902	253							9	0	0	61	10	27	0	96	0	204							8
	251	43	1	13	265	13	4	730	0	173							0	0	0	179	209	0	0	448	817	300							1	0	0	53	6	3	4	60	0	185							220
	119	79	0	2	164	2	5	750	0	334							0	2	0	247	128	0	0	437	445	554							1	0	0	47	5	68	0	74	0	208							171
	269	191	0	1	316	5	5	707	0	172							0	5	27	230	136	4	0	531	115	468							0	0	0	79	63	51	0	12	0	100							1
	192	211	2	3	214	231	6	549	3	455							0	0	54	140	157	2	0	383	70	244							18	0	0	100	82	60	0	63	0	224							2
	118	273	81	0	145	434	5	837	249	436							0	13	116	147	151	0	0	275	292	240							1	8	0	68	45	37	0	81	0	296							5
	148	357	530	2	89	501	48	917	460	322							10	13	139	117	163	2	35	273	422	250							21	0	0	106	74	2	95	99	0	327							0
	23	391	561	0	108	415	195	922	510	343							2	1	177	62	138	0	290	316	207	232							9	0	0	75	162	12	56	60	7	389							2
	5	419	449	10	14	402	570	828	526	182							0	9	337	67	58	0	320	345	53	36							50	0	0	101	296	69	76	50	5	419							0
	116	242	429	5	90	323	627	1065	392	187							0	74	319	77	93	0	318	310	124	34							167	0	0	174	263	123	161	171	0	500							0
	2	342	407	1	267	233	493	1002	517	422							0	137	159	61	110	0	325	255	138	7							90	0	0	154	268	81	175	203	0	524							0
	62	523	310	126	98	315	274	696	630	148							0	131	70	250	214	1	348	62	179	5							87	0	1	124	233	37	124	166	0	540							0
	431	581	468	230	130	316	223	210	647	311							0	92	129	200	163	1	395	244	267	34							83	0	67	149	278	40	143	216	0	435							0
	545	472	501	206	219	454	407	258	704	143							0	76	70	287	80	0	523	459	531	79							52	0	6	156	122	36	206	102	0	373							0
	589	718	474	159	105	367	508	203	906	269							0	49	87	237	52	1	606	570	633	157							0	0	2	132	95	76	156	212	0	181							0
	347	742	364	201	353	362	482	566	794	239							0	22	72	78	136	2	661	403	393	125							5	0	5	129	92	78	213	146	0	89							0
	522	913	343	84	435	393	473	467	749	207							0	31	11	107	0	0	841	518	94	154							10	0	21	113	69	36	150	72	0	203							0
	387	920	327	111	397	361	474	632	611	279							0	64	26	144	6	0	931	542	451	69							4	0	18	59	48	37	80	111	0	284							66
	252	514	379	75	594	459	386	826	529	251							0	42	8	156	44	0	885	268	172	101							25	0	28	139	51	58	168	76	0	328							71
	215	574	382	181	672	447	742	866	367	242							0	48	4	292	0	0	706	177	412	178							10	1	101	110	220	28	124	152	0	188							103
	131	511	512	46	778	339	769	371	251	71							0	50	32	193	138	0	542	125	684	146							4	0	114	162	87	15	50	104	0	214							61
	179	261	489	17	884	319	540	627	164	50							0	9	11	139	228	1	550	176	861	119							3	0	44	345	35	8	81	110	7	180							44
	141	286	275	99	975	367	378	643	290	179							0	11	5	187	85	3	523	255	724	179							0	0	74	403	5	2	316	99	5	80							48
	54	352	127	29	860	348	374	372	259	256							0	12	30	99	247	1	458	187	394	45							1	0	85	214	15	2	483	32	1	72							101
	112	267	256	65	874	181	429	259	65	38							0	0	0	45	159	2	395	14	384	2							0	0	63	171	5	5	380	110	0	120							98
	14	296	371	14	717	165	547	32	262	88							0	0	0	84	144	7	294	148	335	35							0	0	6	127	1	4	327	80	0	122							161
	14	674	494	43	765	203	771	8	283	198							0	0	14	20	9	3	198	415	212	35							0	0	0	153	5	1	291	121	0	199							100
	34	806	424	0	740	259	749	0	120	38							0	1	1	58	48	0	118	364	104	2							0	0	12	172	2	1	109	91	0	140							128
	77	847	384	7	691	276	634	1	124	196							0	0	0	37	59	0	86	245	20	40							0	0	14	124	0	2	103	50	0	137							84
	89	787	669	11	711	198	965	0	68	43							0	0	11	5	0	0	159	427	73	136							0	0	9	38	0	2	155	70	0	105							124
	24	852	537	2	663	111	890	0	150	43							0	0	42	4	1	0	184	457	447	546							0	0	7	27	0	12	245	51	0	156							118
	6	990	202	4	476	159	670	0	196	131							0	0	152	3	7	1	140	447	306	535							0	0	9	36	0	1	311	82	0	226							93
	94	1044	29	6	399	188	566	2	93	59							0	0	236	0	13	0	13	439	146	256							0	0	2	32	0	6	385	194	0	164							106
	1	991	90	4	375	77	265	9	37	31							0	1	304	0	78	0	49	354	140	329							0	0	19	11	0	35	473	188	0	297							73
	22	634	1	12	186	142	88	7	63	54							0	0	256	4	0	0	175	174	47	216							0	0	127	8	0	0	430	135	0	389							38
	61	611	77	0	78	151	89	5	319	112							0	1	53	0	30	2	156	195	8	309							0	10	151	28	0	15	431	49	0	384							8
	102	681	1	22	193	129	90	6	549	151							4	4	16	0	16	2	111	282	184	219							0	1	108	8	0	7	549	23	0	279							24
	481	533	3	0	42	140	200	22	809	199							0	0	25	11	2	0	64	224	264	230							0	0	83	60	1	4	490	35	9	266							22
	436	573	111	24	303	102	417	258	877	517							0	0	32	4	26	0	154	173	218	119							0	0	99	16	0	17	395	111	0	186							55
	454	543	161	21	157	159	392	915	783	502							0	1	19	67	327	0	165	196	170	312							0	1	6	5	0	55	286	73	0	121							24
	634	619	92	118	347	227	229	1013	1008	416							0	2	18	216	112	0	267	167	23	336							0	0	9	0	0	45	491	51	0	30							46
	314	547	63	30	117	239	120	533	957	369							0	1	8	69	317	1	373	179	78	131							0	0	22	0	0	34	393	63	0	36							201
	274	723	1	31	270	346	35	488	794	539							0	1	1	93	253	0	489	201	247	109							0	0	7	0	0	87	363	150	0	110							54
	360	658	57	27	64	378	426	784	687	658							0	1	96	90	212	0	296	259	221	129							0	0	3	0	2	79	162	27	1	135							44
	406	373	11	36	50	385	596	846	559	611							0	0	431	124	81	0	118	269	52	116							0	0	20	0	0	83	122	33	0	24							43
	434	349	1	2	104	563	878	674	408	659							0	0	560	120	164	0	46	221	210	98							0	0	0	2	1	52	159	20	0	123							43
	587	249	2	17	189	516	816	307	180	604							0	0	547	100	113	3	42	73	37	148							0	0	1	0	0	131	167	30	0	76							155
	336	106	0	62	83	515	822	437	209	676							0	1	432	93	60	0	0	24	121	181							0	0	2	4	0	140	84	131	0	101							360
	569	11	2	14	197	550	869	886	82	435							0	2	356	50	30	0	57	14	284	121							0	0	0	5	0	112	13	130	0	61							395
	545	18	75	0	27	516	950	769	119	387							0	9	491	15	108	0	90	27	265	75							0	1	2	3	0	136	0	149	0	47							272
	299	40	449	197	195	655	906	455	112	602							0	6	447	26	10	0	127	20	11	62							0	0	0	1	0	113	2	180	0	181							296
	255	4	720	438	89	632	977	736	26	560							0	35	489	4	91	0	5	6	85	74							0	0	0	1	0	40	17	154	4	108							274
	192	0	821	499	120	426	965	669	6	599							0	99	680	1	85	1	68	0	76	121							0	0	0	6	0	45	49	53	6	151							127
	173	2	713	411	145	336	925	685	6	693							0	59	667	9	8	0	14	0	10	142							0	0	0	30	0	34	1	86	1	136							66
	139	19	645	269	292	264	1034	638	8	615							0	83	537	7	0	0	28	21	15	178							0	0	0	26	0	25	0	114	0	96							68
	127	154	500	275	265	279	1118	630	0	724							0	93	470	3	87	0	0	211	1	181							0	6	0	1	0	22	0	230	0	148							44
	34	91	490	280	215	237	1210	589	1	649							0	73	379	11	0	0	22	135	8	187							0	117	0	6	0	19	3	327	0	150							37
	66	27	356	292	87	120	987	501	0	598							0	83	370	27	3	0	52	222	1	131							0	110	0	4	0	62	6	316	0	203							21
	250	7	8	236	18	207	754	366	0	721							0	91	161	15	0	0	94	186	0	95							0	28	0	1	0	21	12	233	0	165							127
	370	2	115	234	11	186	751	360	0	627							0	55	89	11	57	1	18	97	4	108							0	9	0	3	0	10	0	197	0	140							70
	575	2	165	269	0	207	607	242	0	598							0	25	116	144	18	0	28	148	0	109							0	7	0	14	0	6	0	109	0	214							4
	647	5	108	321	0	269	855	275	0	473							0	12	99	117	69	0	20	179	0	50							0	4	0	5	0	2	2	103	0	83							18
	724	1	47	281	23	234	820	343	0	300							0	15	133	118	60	1	30	149	1	46							0	9	0	34	0	5	1	129	0	122							12
	617	3	235	319	148	217	827	365	0	272							0	22	187	76	75	1	56	166	1	74							0	16	0	25	0	2	1	185	0	70							0
	409	0	300	320	198	190	673	268	33	355							0	10	160	31	10	1	119	164	2	97							0	32	0	4	0	3	0	112	0	141							6
	483	0	360	476	292	200	739	194	312	387							0	6	141	2	4	0	118	145	0	73							0	6	0	42	0	1	2	110	0	148							52
	561	1	404	531	157	237	746	147	147	444							7	12	134	9	73	5	27	126	35	95							2	8	1	41	0	3	4	68	0	23							17
	479	41	270	527	167	218	739	177	220	177							0	58	123	13	191	1	7	194	275	181							19	23	0	40	0	0	2	47	10	23							160
	489	43	157	572	204	221	881	221	228	194							0	37	154	10	245	0	60	143	553	246							2	17	0	48	0	0	0	12	1	139							469
	349	5	104	460	214	136	704	162	239	284							0	24	371	11	257	0	46	137	676	174							4	0	0	71	13	2	17	0	0	256							467
	432	9	58	375	199	44	808	390	371	315							0	33	635	30	203	14	32	179	674	135							21	0	0	84	2	1	21	6	0	259							517
	411	8	60	346	279	88	994	439	465	490							0	24	770	6	266	37	27	273	389	81							0	0	0	37	4	0	3	0	1	383							730
	338	0	15	463	180	68	942	355	351	334							0	46	768	31	108	21	19	281	250	62							0	1	0	19	21	1	53	3	1	415							892
	317	3	181	626	86	24	766	58	339	314							11	64	692	4	114	108	16	166	387	90							0	2	0	17	1	1	36	41	0	547							811
	570	4	341	665	161	117	561	220	282	178							56	66	691	1	142	140	48	226	652	118							0	0	0	50	1	0	0	344	0	534							484
	878	2	340	654	363	59	546	295	224	198							198	83	551	1	210	108	28	426	773	259							0	0	0	36	5	0	2	83	0	344							143
	895	15	372	588	570	31	460	230	206	273							184	96	519	56	154	96	7	301	877	271							0	0	0	62	2	0	4	39	0	227							229
	898	26	216	497	402	50	306	202	105	307							152	118	588	88	277	31	33	273	871	242							0	0	0	58	0	0	14	70	1	143							291
[truncated: 1,215 more rows]
[truncated: 104 more columns]
