# Supplementary material for: Stimulus salience determines defensive behaviors elicited by aversively conditioned serial compound auditory stimuli
Source: eLife journal article supplement (doi:10.7554/elife.53803), 2020-03-27
Supplement: supp [file elife-53803-supp-v1.zip › elife_poa_e53803_Figure_1_source_data_2.xlsx]

## Sheet: STATISTICS
Figure 1 – Source Data 2
Figure panel	Group Size	Statistical test	Comparison	Significant comparisons	P-value
1G	Group 1, n=15	2-Way Repeated Measures ANOVA with Trial and Stimulus as factors	Conditioning Day 1 (trials 1-5), % freezing	Main Effect of Trial (F (4, 56) = 35.46)	p<0.0001
1G	Group 1, n=15	2-Way Repeated Measures ANOVA with Trial and Stimulus as factors	Conditioning Day 1 (trials 1-5), % freezing	Main Effect of Stimulus (F (1, 14) = 45.03)	p<0.0001
1G	Group 1, n=15	2-Way Repeated Measures ANOVA with Trial and Stimulus as factors	Conditioning Day 1 (trials 1-5), % freezing	Significant Interaction (F (4, 56) = 14.31)	p<0.0001
1G	Group 1, n=15	2-Way Repeated Measures ANOVA with Trial and Stimulus as factors	Conditioning Day 2 (trials 6-10), % freezing	Main Effect of Trial (F (4, 56) = 3.054)	p<0.05
1G	Group 1, n=15	2-Way Repeated Measures ANOVA with Trial and Stimulus as factors	Conditioning Day 2 (trials 6-10), % freezing	Main Effect of Stimulus (F (1, 14) = 328.5)	p<0.0001
1G	Group 1, n=15	2-Way Repeated Measures ANOVA with Trial and Stimulus as factors	Conditioning Day 2 (trials 6-10), % freezing	Significant Interaction F (4, 56) = 3.292)	p<0.05
1H	Group 2, n=10	2-Way Repeated Measures ANOVA with Trial and Stimulus as factors	Conditioning Day 1 (trials 1-5), % freezing	Main Effect of Trial (F (4, 36) = 23.91)	p<0.0001
1H	Group 2, n=10	2-Way Repeated Measures ANOVA with Trial and Stimulus as factors	Conditioning Day 1 (trials 1-5), % freezing	Main Effect of Stimulus (F (1, 9) = 83.12)	p<0.0001
1H	Group 2, n=10	2-Way Repeated Measures ANOVA with Trial and Stimulus as factors	Conditioning Day 1 (trials 1-5), % freezing	Significant Interaction (F (4, 36) = 15.45)	p<0.0001
1H	Group 2, n=10	2-Way Repeated Measures ANOVA with Trial and Stimulus as factors	Conditioning Day 2 (trials 6-10), % freezing	Main Effect of Stimulus (F (1, 9) = 182.5)	p<0.0001
1I	Group 3, n=10	2-Way Repeated Measures ANOVA with Trial and Stimulus as factors	Conditioning Day 1 (trials 1-5), % freezing	Main Effect of Trial (F (4, 36) = 8.984)	p<0.0001
1I	Group 3, n=10	2-Way Repeated Measures ANOVA with Trial and Stimulus as factors	Conditioning Day 1 (trials 1-5), % freezing	Main Effect of Stimulus (F (1, 9) = 9.339)	p<0.05
1I	Group 3, n=10	2-Way Repeated Measures ANOVA with Trial and Stimulus as factors	Conditioning Day 1 (trials 1-5), % freezing	Significant Interaction (F (4, 36) = 3.831)	p<0.05
1I	Group 3, n=10	2-Way Repeated Measures ANOVA with Trial and Stimulus as factors	Conditioning Day 2 (trials 6-10), % freezing	Main Effect of Stimulus (F (1, 9) = 178.6)	p<0.0001
1J	Group 1, n=15	2-Way Repeated Measures ANOVA with Trial and Stimulus as factors	Conditioning Day 1 (trials 1-5), Average Motion	Main Effect of Trial (F (4, 56) = 25.20)	p<0.0001
1J	Group 1, n=15	2-Way Repeated Measures ANOVA with Trial and Stimulus as factors	Conditioning Day 1 (trials 1-5), Average Motion	Main Effect of Stimulus (F (1, 14) = 14.38)	p<0.01
1J	Group 1, n=15	2-Way Repeated Measures ANOVA with Trial and Stimulus as factors	Conditioning Day 1 (trials 1-5), Average Motion	Significant Interaction (F (4, 56) = 7.688)	p<0.0001
1J	Group 1, n=15	2-Way Repeated Measures ANOVA with Trial and Stimulus as factors	Conditioning Day 2 (trials 6-10), Average Motion	Main Effect of Stimulus (F (1, 14) = 74.91)	p<0.0001
1K	Group 2, n=10	2-Way Repeated Measures ANOVA with Trial and Stimulus as factors	Conditioning Day 1 (trials 1-5), Average Motion	Main Effect of Trial (F (4, 36) = 24.52)	p<0.0001
1K	Group 2, n=10	2-Way Repeated Measures ANOVA with Trial and Stimulus as factors	Conditioning Day 1 (trials 1-5), Average Motion	Main Effect of Stimulus (F (1, 9) = 19.57)	p<0.01
1K	Group 2, n=10	2-Way Repeated Measures ANOVA with Trial and Stimulus as factors	Conditioning Day 2 (trials 6-10), Average Motion	Main Effect of Stimulus (F (1, 9) = 32.04)	p<0.001
1L	Group 3, n=10	2-Way Repeated Measures ANOVA with Trial and Stimulus as factors	Conditioning Day 1 (trials 1-5), Average Motion	Main Effect of Trial (F (4, 36) = 17.73)	p<0.0001
1L	Group 3, n=10	2-Way Repeated Measures ANOVA with Trial and Stimulus as factors	Conditioning Day 1 (trials 1-5), Average Motion	Main Effect of Stimulus (F (1, 9) = 5.672)	p<0.05
1L	Group 3, n=10	2-Way Repeated Measures ANOVA with Trial and Stimulus as factors	Conditioning Day 1 (trials 1-5), Average Motion	Significant Interaction (F (4, 36) = 3.556)	p<0.05
1L	Group 3, n=10	2-Way Repeated Measures ANOVA with Trial and Stimulus as factors	Conditioning Day 2 (trials 6-10), Average Motion	Main Effect of Stimulus (F (1, 9) = 14.94)	p<0.01
1M	Group 1, n=15	2-Way Repeated Measures ANOVA with Trial and Stimulus as factors	Conditioning Day 1 (trials 1-5), Escape Score	Main Effect of Trial (F (4, 56) = 9.697)	p<0.0001
1M	Group 1, n=15	2-Way Repeated Measures ANOVA with Trial and Stimulus as factors	Conditioning Day 1 (trials 1-5), Escape Score	Main Effect of Stimulus (F (1, 14) = 19.09)	p<0.001
1M	Group 1, n=15	2-Way Repeated Measures ANOVA with Trial and Stimulus as factors	Conditioning Day 1 (trials 1-5), Escape Score	Significant Interaction (F (4, 56) = 7.168)	p<0.0001
1M	Group 1, n=15	2-Way Repeated Measures ANOVA with Trial and Stimulus as factors	Conditioning Day 2 (trials 6-10), Escape Score	Main Effect of Stimulus (F (1, 14) = 74.81)	p<0.0001
1N	Group 2, n=10	2-Way Repeated Measures ANOVA with Trial and Stimulus as factors	Conditioning Day 1 (trials 1-5), Escape Score	Main Effect of Stimulus (F (1, 9) = 29.87)	p<0.001
1N	Group 2, n=10	2-Way Repeated Measures ANOVA with Trial and Stimulus as factors	Conditioning Day 2 (trials 6-10), Escape Score	Main Effect of Stimulus (F (1, 9) = 25.04)	p<0.001
1O	Group 3, n=10	2-Way Repeated Measures ANOVA with Trial and Stimulus as factors	Conditioning Day 1 (trials 1-5), Escape Score	Main Effect of Trial (F (4, 36) = 2.949)	p<0.05
1O	Group 3, n=10	2-Way Repeated Measures ANOVA with Trial and Stimulus as factors	Conditioning Day 1 (trials 1-5), Escape Score	Main Effect of Stimulus (F (1, 9) = 15.74)	p<0.01
1O	Group 3, n=10	2-Way Repeated Measures ANOVA with Trial and Stimulus as factors	Conditioning Day 2 (trials 6-10), Escape Score	Main Effect of Stimulus (F (1, 9) = 13.06)	p<0.01
1G,I	Group 1, n=15; Group 3, n=10	3-Way Repeated Measures ANOVA with Group, Stimulus, and Trial as factors	Conditioning Day 2 (trials 6-10), % freezing	Main Effect of Stimulus (F(1,23) = 429.5)	p<0.0001
1G,I	Group 1, n=15; Group 3, n=10	3-Way Repeated Measures ANOVA with Group, Stimulus, and Trial as factors	Conditioning Day 2 (trials 6-10), % freezing	Main Effect of Trial (F(4,92) = 5.083)	p=0.001
1G,I	Group 1, n=15; Group 3, n=10	3-Way Repeated Measures ANOVA with Group, Stimulus, and Trial as factors	Conditioning Day 2 (trials 6-10), % freezing	Group X Stimulus Interaction, (F(1,23) = 27.51)	p<0.0001
1G,I	Group 1, n=15; Group 3, n=10	2-Way Repeated Measures ANOVA with Group and Trial as factors	Conditioning Day 2 (trials 6-10), % freezing to Tone	Main Effect of Trial (F(3.2, 75.9) = 3.79)	p<0.05
1G,I	Group 1, n=15; Group 3, n=10	2-Way Repeated Measures ANOVA with Group and Trial as factors	Conditioning Day 2 (trials 6-10), % freezing to Tone	Main Effect of Group (F(1,23) = 6.41	p<0.05
1J,L	Group 1, n=15; Group 3, n=10	3-Way Repeated Measures ANOVA with Group, Stimulus, and Trial as factors	Conditioning Day 2 (trials 6-10), Average Motion	Main Effect of Stimulus (F(1,23) = 69.89	p<0.0001
1J,L	Group 1, n=15; Group 3, n=10	3-Way Repeated Measures ANOVA with Group, Stimulus, and Trial as factors	Conditioning Day 2 (trials 6-10), Average Motion	Main Effect of Group (F(1,23) = 11.75	p<0.01
1J,L	Group 1, n=15; Group 3, n=10	3-Way Repeated Measures ANOVA with Group, Stimulus, and Trial as factors	Conditioning Day 2 (trials 6-10), Average Motion	Group X Stimulus Interaction (F(1,23) = 19.77	p<0.001
1J,L	Group 1, n=15; Group 3, n=10	2-Way Repeated Measures ANOVA with Group and Trial as factors	Conditioning Day 2 (trials 6-10), Average Motion to Noise	Main Effect of Group (F(1,23) = 15.79	p<0.001
1M,O	Group 1, n=15; Group 3, n=10	3-Way Repeated Measures ANOVA with Group, Stimulus, and Trial as factors	Conditioning Day 2 (trials 6-10), Escape Score	Main Effect of Stimulus (F(1,23) = 67.85)	p<0.0001
1M,O	Group 1, n=15; Group 3, n=10	3-Way Repeated Measures ANOVA with Group, Stimulus, and Trial as factors	Conditioning Day 2 (trials 6-10), Escape Score	Main Effect of Group (F(1,23) = 15.98	p<0.001
1M,O	Group 1, n=15; Group 3, n=10	3-Way Repeated Measures ANOVA with Group, Stimulus, and Trial as factors	Conditioning Day 2 (trials 6-10), Escape Score	Group X Stimulus Interaction (F(1,23) = 20.41	p<0.001
1M,O	Group 1, n=15; Group 3, n=10	2-Way Repeated Measures ANOVA with Group and Trial as factors	Conditioning Day 2 (trials 6-10), Escape Score to Noise	Main Effect of Group (F(1,23) = 18.25)	p<0.001
