# Supplementary material for: Stimulus salience determines defensive behaviors elicited by aversively conditioned serial compound auditory stimuli
Source: eLife journal article supplement (doi:10.7554/elife.53803), 2020-03-27
Supplement: supp [file elife-53803-supp-v1.zip › elife_poa_e53803_Figure_2_source_data_1.xlsx]

## Sheet: PupilTrace-Tone-All10Trials
Included Pupil Traces, Tone-WN, All 10 Trials
	0.625582	14.7346	NaN	NaN	NaN	NaN	NaN	NaN	NaN	-0.452216	3.94436	NaN	NaN	NaN	NaN	-4.35613	NaN	NaN	NaN	NaN	NaN	NaN	NaN	20.3616	-4.77329	NaN	-3.32711	NaN	-6.746	12.4256	NaN	NaN	26.6481	NaN	0.958792	NaN	NaN	NaN	NaN	-2.52056	NaN	NaN	NaN	NaN	7.44231	-0.243868	8.82676	-5.77985	-6.21259
	-1.85564	12.0125	NaN	NaN	NaN	NaN	NaN	NaN	NaN	-2.74004	2.56366	NaN	NaN	NaN	NaN	-2.62971	NaN	NaN	NaN	NaN	NaN	NaN	NaN	21.2303	-5.9466	NaN	0.494623	NaN	-5.4221	11.0228	NaN	NaN	28.3743	NaN	2.86663	NaN	NaN	NaN	NaN	-3.35273	NaN	NaN	NaN	NaN	9.1157	-2.77036	8.6535	-7.12666	-5.96255
	-2.02106	8.19803	NaN	NaN	NaN	NaN	NaN	NaN	NaN	-5.90819	29.8702	NaN	NaN	NaN	NaN	-3.96127	NaN	NaN	NaN	NaN	NaN	NaN	NaN	19.4552	-8.36869	NaN	0.011708	NaN	18.7317	9.43138	NaN	NaN	26.7317	NaN	1.94129	NaN	NaN	NaN	NaN	-3.10507	NaN	NaN	NaN	NaN	8.28697	-4.66987	5.49646	-7.67506	-6.3045
	-0.760194	9.41361	NaN	NaN	NaN	NaN	NaN	NaN	NaN	-4.09117	31.9024	NaN	NaN	NaN	NaN	-0.0109036	NaN	NaN	NaN	NaN	NaN	NaN	NaN	20.445	4.08513	NaN	4.13319	NaN	16.044	-13.08	NaN	NaN	29.5998	NaN	3.19599	NaN	NaN	NaN	NaN	-2.9614	NaN	NaN	NaN	NaN	10.2739	-4.57596	6.83	-7.05975	-6.1074
	-0.973508	7.58073	NaN	NaN	NaN	NaN	NaN	NaN	NaN	-5.37071	32.7133	NaN	NaN	NaN	NaN	-1.31133	NaN	NaN	NaN	NaN	NaN	NaN	NaN	18.4943	14.8209	NaN	5.62215	NaN	-5.95376	-13.2437	NaN	NaN	29.5531	NaN	2.09386	NaN	NaN	NaN	NaN	-2.23118	NaN	NaN	NaN	NaN	11.5102	-5.31242	5.53949	-6.47286	-6.09201
	0.681971	9.17011	NaN	NaN	NaN	NaN	NaN	NaN	NaN	-3.90381	3.25401	NaN	NaN	NaN	NaN	0.517794	NaN	NaN	NaN	NaN	NaN	NaN	NaN	18.5245	-5.35995	NaN	8.5822	NaN	-7.23321	-11.8035	NaN	NaN	28.3038	NaN	2.28038	NaN	NaN	NaN	NaN	-0.507452	NaN	NaN	NaN	NaN	13.8712	-2.02731	4.43491	-8.73767	-4.74027
	1.55828	9.78496	NaN	NaN	NaN	NaN	NaN	NaN	NaN	-4.55271	8.22784	NaN	NaN	NaN	NaN	-0.869717	NaN	NaN	NaN	NaN	NaN	NaN	NaN	17.4549	-7.15765	NaN	8.11293	NaN	-8.84269	-12.2216	NaN	NaN	28.5232	NaN	1.91845	NaN	NaN	NaN	NaN	-1.139	NaN	NaN	NaN	NaN	12.499	-3.58442	3.83146	-6.81383	-4.92847
	3.80274	9.08676	NaN	NaN	NaN	NaN	NaN	NaN	NaN	-3.12189	10.0211	NaN	NaN	NaN	NaN	0.935817	NaN	NaN	NaN	NaN	NaN	NaN	NaN	17.1402	-2.14178	NaN	8.5825	NaN	-5.73329	-11.0978	NaN	NaN	28.4251	NaN	3.66183	NaN	NaN	NaN	NaN	-1.25584	NaN	NaN	NaN	NaN	15.8179	-2.60925	3.42432	-4.22261	-5.53997
	5.65225	9.53114	NaN	NaN	NaN	NaN	NaN	NaN	NaN	-3.56968	11.202	NaN	NaN	NaN	NaN	0.29414	NaN	NaN	NaN	NaN	NaN	NaN	NaN	15.7671	-3.763	NaN	6.45262	NaN	-8.74113	-9.74836	NaN	NaN	26.2272	NaN	4.5881	NaN	NaN	NaN	NaN	-1.17125	NaN	NaN	NaN	NaN	14.0073	-2.44105	1.49838	-2.92016	-6.02684
	9.06344	8.80346	NaN	NaN	NaN	NaN	NaN	NaN	NaN	-3.50892	12.0014	NaN	NaN	NaN	NaN	1.21276	NaN	NaN	NaN	NaN	NaN	NaN	NaN	15.4476	-3.48253	NaN	6.47937	NaN	-6.54993	-7.73491	NaN	NaN	27.0993	NaN	8.47568	NaN	NaN	NaN	NaN	-0.909513	NaN	NaN	NaN	NaN	15.8075	-1.44056	2.80358	-1.68521	-6.01297
	9.57012	8.60108	NaN	NaN	NaN	NaN	NaN	NaN	NaN	-3.32494	5.74093	NaN	NaN	NaN	NaN	2.92899	NaN	NaN	NaN	NaN	NaN	NaN	NaN	14.3572	-6.2588	NaN	3.17586	NaN	-8.53636	-3.89757	NaN	NaN	26.3008	NaN	8.8534	NaN	NaN	NaN	NaN	-1.81408	NaN	NaN	NaN	NaN	14.4571	-0.858349	0.0440995	-0.808948	-7.31778
	10.8602	8.98555	NaN	NaN	NaN	NaN	NaN	NaN	NaN	-2.31076	22.0022	NaN	NaN	NaN	NaN	3.96521	NaN	NaN	NaN	NaN	NaN	NaN	NaN	15.5141	-4.64971	NaN	4.58189	NaN	-8.73948	-0.480719	NaN	NaN	27.4933	NaN	2.79014	NaN	NaN	NaN	NaN	-1.68171	NaN	NaN	NaN	NaN	18.6423	1.15746	0.919851	0.358208	-6.41725
	10.7228	9.70425	NaN	NaN	NaN	NaN	NaN	NaN	NaN	-1.85324	38.2635	NaN	NaN	NaN	NaN	4.42737	NaN	NaN	NaN	NaN	NaN	NaN	NaN	15.1073	-6.57096	NaN	1.41823	NaN	-9.54653	0.514025	NaN	NaN	28.4704	NaN	-7.31872	NaN	NaN	NaN	NaN	-1.74207	NaN	NaN	NaN	NaN	18.1124	1.472	-1.39582	0.201406	-6.21891
	12.1933	11.5082	NaN	NaN	NaN	NaN	NaN	NaN	NaN	-0.0285604	11.6017	NaN	NaN	NaN	NaN	6.65272	NaN	NaN	NaN	NaN	NaN	NaN	NaN	16.5286	-5.32303	NaN	2.68313	NaN	-5.87178	4.58365	NaN	NaN	29.1485	NaN	-2.3985	NaN	NaN	NaN	NaN	-1.3926	NaN	NaN	NaN	NaN	16.489	1.79652	-1.8392	0.710005	-5.76421
	12.0268	11.882	NaN	NaN	NaN	NaN	NaN	NaN	NaN	0.31928	9.69449	NaN	NaN	NaN	NaN	6.45485	NaN	NaN	NaN	NaN	NaN	NaN	NaN	15.7844	-6.02419	NaN	0.894835	NaN	-7.76766	5.78617	NaN	NaN	28.3359	NaN	8.66454	NaN	NaN	NaN	NaN	-2.50737	NaN	NaN	NaN	NaN	15.6975	1.14873	-2.37195	1.84835	-6.61283
	12.4224	11.934	NaN	NaN	NaN	NaN	NaN	NaN	NaN	2.0452	10.1767	NaN	NaN	NaN	NaN	3.4471	NaN	NaN	NaN	NaN	NaN	NaN	NaN	16.5436	-3.92098	NaN	0.892318	NaN	-3.39895	8.10647	NaN	NaN	29.0854	NaN	5.82177	NaN	NaN	NaN	NaN	-1.78033	NaN	NaN	NaN	NaN	16.5915	1.58364	-2.09783	1.626	-6.69476
	12.0823	11.7619	NaN	NaN	NaN	NaN	NaN	NaN	NaN	2.58956	8.6439	NaN	NaN	NaN	NaN	4.19629	NaN	NaN	NaN	NaN	NaN	NaN	NaN	16.4043	-6.30831	NaN	0.201789	NaN	-7.47119	7.47587	NaN	NaN	29.718	NaN	-2.26429	NaN	NaN	NaN	NaN	-3.03128	NaN	NaN	NaN	NaN	17.8483	1.19158	-2.98655	3.0158	-6.6368
	13.2482	13.3236	NaN	NaN	NaN	NaN	NaN	NaN	NaN	3.5791	9.6156	NaN	NaN	NaN	NaN	6.21886	NaN	NaN	NaN	NaN	NaN	NaN	NaN	17.7544	-1.55548	NaN	-0.344327	NaN	-6.69034	7.89056	NaN	NaN	30.8993	NaN	-4.85861	NaN	NaN	NaN	NaN	-3.6667	NaN	NaN	NaN	NaN	19.868	1.68458	-1.73152	4.68167	-6.8065
	12.1626	14.1691	NaN	NaN	NaN	NaN	NaN	NaN	NaN	4.06182	7.67485	NaN	NaN	NaN	NaN	2.94133	NaN	NaN	NaN	NaN	NaN	NaN	NaN	17.5809	-2.59826	NaN	-1.7516	NaN	-8.43137	6.5434	NaN	NaN	31.2433	NaN	3.13302	NaN	NaN	NaN	NaN	-4.41414	NaN	NaN	NaN	NaN	20.7313	0.472575	-3.10587	5.73002	-6.18361
	13.0736	13.1171	NaN	NaN	NaN	NaN	NaN	NaN	NaN	5.20749	7.64998	NaN	NaN	NaN	NaN	3.12729	NaN	NaN	NaN	NaN	NaN	NaN	NaN	18.2848	-1.39312	NaN	-0.48956	NaN	-8.20475	6.46801	NaN	NaN	33.3641	NaN	7.24315	NaN	NaN	NaN	NaN	-4.78134	NaN	NaN	NaN	NaN	22.2585	0.481863	-1.37202	7.20466	-6.94514
	12.1756	12.5445	NaN	NaN	NaN	NaN	NaN	NaN	NaN	5.55096	5.92983	NaN	NaN	NaN	NaN	1.4517	NaN	NaN	NaN	NaN	NaN	NaN	NaN	18.2786	-2.54837	NaN	-0.67489	NaN	-8.38138	5.954	NaN	NaN	33.0097	NaN	18.5269	NaN	NaN	NaN	NaN	-5.79739	NaN	NaN	NaN	NaN	22.8394	-0.0572066	-3.37302	8.02543	-5.0799
	11.1882	12.7373	NaN	NaN	NaN	NaN	NaN	NaN	NaN	5.70276	6.47927	NaN	NaN	NaN	NaN	3.50594	NaN	NaN	NaN	NaN	NaN	NaN	NaN	20.4554	1.42164	NaN	0.612324	NaN	-7.22371	6.84705	NaN	NaN	34.6899	NaN	23.0021	NaN	NaN	NaN	NaN	-4.76648	NaN	NaN	NaN	NaN	23.6347	0.184066	0.760321	8.48164	-4.94502
	10.3085	11.3519	NaN	NaN	NaN	NaN	NaN	NaN	NaN	4.9636	5.54453	NaN	NaN	NaN	NaN	0.791461	NaN	NaN	NaN	NaN	NaN	NaN	NaN	19.4215	-2.07687	NaN	0.450018	NaN	-5.37186	6.93164	NaN	NaN	34.1835	NaN	22.9653	NaN	NaN	NaN	NaN	-4.70424	NaN	NaN	NaN	NaN	24.4489	0.993052	-2.21702	8.13814	-5.2901
	10.3574	11.3204	NaN	NaN	NaN	NaN	NaN	NaN	NaN	5.73947	6.62185	NaN	NaN	NaN	NaN	1.34464	NaN	NaN	NaN	NaN	NaN	NaN	NaN	19.3622	-1.99569	NaN	-0.79025	NaN	-2.73393	8.19532	NaN	NaN	35.819	NaN	26.1099	NaN	NaN	NaN	NaN	-4.13241	NaN	NaN	NaN	NaN	22.3346	3.2673	-2.64645	8.18827	-4.94234
	8.30326	8.35038	NaN	NaN	NaN	NaN	NaN	NaN	NaN	5.78394	5.41144	NaN	NaN	NaN	NaN	0.594173	NaN	NaN	NaN	NaN	NaN	NaN	NaN	20.0493	7.77638	NaN	-2.21364	NaN	-1.56996	6.88319	NaN	NaN	35.1978	NaN	25.6887	NaN	NaN	NaN	NaN	-3.8467	NaN	NaN	NaN	NaN	22.549	3.70845	-1.37092	8.17294	-4.82096
	8.66248	11.3869	NaN	NaN	NaN	NaN	NaN	NaN	NaN	6.26877	6.8543	NaN	NaN	NaN	NaN	0.714678	NaN	NaN	NaN	NaN	NaN	NaN	NaN	21.3065	11.6527	NaN	-2.35514	NaN	3.3997	6.7278	NaN	NaN	35.202	NaN	26.4093	NaN	NaN	NaN	NaN	-2.5566	NaN	NaN	NaN	NaN	17.8762	5.67336	-0.0757175	8.67995	-5.02312
	7.69671	8.006	NaN	NaN	NaN	NaN	NaN	NaN	NaN	5.55853	6.09559	NaN	NaN	NaN	NaN	-0.148869	NaN	NaN	NaN	NaN	NaN	NaN	NaN	21.4656	11.8375	NaN	-3.50919	NaN	4.96503	4.89664	NaN	NaN	35.2618	NaN	25.2637	NaN	NaN	NaN	NaN	-2.67566	NaN	NaN	NaN	NaN	17.3346	5.09312	2.13337	8.17787	-5.23976
	8.41526	8.92094	NaN	NaN	NaN	NaN	NaN	NaN	NaN	5.67479	5.93545	NaN	NaN	NaN	NaN	0.0785686	NaN	NaN	NaN	NaN	NaN	NaN	NaN	21.5129	12.1111	NaN	-4.94748	NaN	-4.05289	4.39575	NaN	NaN	35.12	NaN	28.1703	NaN	NaN	NaN	NaN	-2.25843	NaN	NaN	NaN	NaN	18.4913	6.78868	3.52243	8.96533	-4.62592
	6.65327	8.10101	NaN	NaN	NaN	NaN	NaN	NaN	NaN	4.43159	5.43354	NaN	NaN	NaN	NaN	0.850388	NaN	NaN	NaN	NaN	NaN	NaN	NaN	21.6969	11.0238	NaN	-5.69037	NaN	9.273	2.44064	NaN	NaN	32.9451	NaN	28.7476	NaN	NaN	NaN	NaN	-2.08753	NaN	NaN	NaN	NaN	15.0703	6.50284	2.9185	7.9742	-6.57134
	7.59242	8.3984	NaN	NaN	NaN	NaN	NaN	NaN	NaN	4.41046	4.34884	NaN	NaN	NaN	NaN	3.28539	NaN	NaN	NaN	NaN	NaN	NaN	NaN	22.4783	13.4564	NaN	-4.51081	NaN	0.914869	1.86748	NaN	NaN	33.4594	NaN	30.7444	NaN	NaN	NaN	NaN	-0.988936	NaN	NaN	NaN	NaN	16.5849	6.26989	3.46399	9.15395	-6.11489
	6.7594	9.12388	NaN	NaN	NaN	NaN	NaN	NaN	NaN	4.20009	2.67354	NaN	NaN	NaN	NaN	3.18103	NaN	NaN	NaN	NaN	NaN	NaN	NaN	22.9963	10.5517	NaN	-3.20129	NaN	14.1013	3.89583	NaN	NaN	31.8994	NaN	31.0481	NaN	NaN	NaN	NaN	-1.20642	NaN	NaN	NaN	NaN	16.7863	5.68137	2.60153	9.39821	-3.92497
	4.66735	9.2249	NaN	NaN	NaN	NaN	NaN	NaN	NaN	5.06797	1.28636	NaN	NaN	NaN	NaN	5.68019	NaN	NaN	NaN	NaN	NaN	NaN	NaN	22.0217	11.89	NaN	-2.35236	NaN	15.9904	4.28782	NaN	NaN	30.6202	NaN	33.7067	NaN	NaN	NaN	NaN	-0.308242	NaN	NaN	NaN	NaN	17.655	5.53024	-0.508596	5.05253	-6.55138
	4.10292	9.11652	NaN	NaN	NaN	NaN	NaN	NaN	NaN	4.46207	1.58474	NaN	NaN	NaN	NaN	0.464478	NaN	NaN	NaN	NaN	NaN	NaN	NaN	19.6614	11.5767	NaN	-3.98812	NaN	13.5561	3.34878	NaN	NaN	27.4369	NaN	32.435	NaN	NaN	NaN	NaN	-1.48681	NaN	NaN	NaN	NaN	15.8541	5.00307	-2.67832	5.97214	-6.07596
	5.70232	7.28485	NaN	NaN	NaN	NaN	NaN	NaN	NaN	5.15282	1.60146	NaN	NaN	NaN	NaN	0.314519	NaN	NaN	NaN	NaN	NaN	NaN	NaN	19.4472	12.2156	NaN	-4.59479	NaN	15.4023	4.86619	NaN	NaN	27.079	NaN	32.6477	NaN	NaN	NaN	NaN	1.33388	NaN	NaN	NaN	NaN	18.6331	6.83254	-2.71845	5.97642	-6.86011
	5.28997	8.82557	NaN	NaN	NaN	NaN	NaN	NaN	NaN	2.95674	-0.591191	NaN	NaN	NaN	NaN	-2.38549	NaN	NaN	NaN	NaN	NaN	NaN	NaN	17.3286	9.94415	NaN	-4.67337	NaN	14.0227	4.84663	NaN	NaN	24.7764	NaN	32.2102	NaN	NaN	NaN	NaN	-2.31286	NaN	NaN	NaN	NaN	14.8862	5.02343	-3.17761	5.79143	-7.40063
	6.50541	13.1141	NaN	NaN	NaN	NaN	NaN	NaN	NaN	2.85384	-0.0726398	NaN	NaN	NaN	NaN	-2.26749	NaN	NaN	NaN	NaN	NaN	NaN	NaN	17.328	11.2209	NaN	-2.77682	NaN	16.3715	4.11879	NaN	NaN	24.9411	NaN	32.3958	NaN	NaN	NaN	NaN	-1.9834	NaN	NaN	NaN	NaN	17.7885	6.59049	-2.79874	5.33525	-7.30774
	4.8008	9.17071	NaN	NaN	NaN	NaN	NaN	NaN	NaN	2.45508	1.43555	NaN	NaN	NaN	NaN	-3.93484	NaN	NaN	NaN	NaN	NaN	NaN	NaN	16.9334	11.7334	NaN	-12.8771	NaN	14.1481	4.35075	NaN	NaN	22.6537	NaN	30.8689	NaN	NaN	NaN	NaN	-2.65858	NaN	NaN	NaN	NaN	16.8874	4.52346	-2.95041	5.68551	-8.39689
	5.48185	6.57146	NaN	NaN	NaN	NaN	NaN	NaN	NaN	2.46696	1.5931	NaN	NaN	NaN	NaN	-2.14626	NaN	NaN	NaN	NaN	NaN	NaN	NaN	17.2139	11.2753	NaN	-11.3901	NaN	14.3334	4.50073	NaN	NaN	22.294	NaN	31.7789	NaN	NaN	NaN	NaN	-2.89885	NaN	NaN	NaN	NaN	19.8987	4.78187	-1.35903	5.96404	-9.1142
	4.3177	4.081	NaN	NaN	NaN	NaN	NaN	NaN	NaN	2.28846	-5.86316	NaN	NaN	NaN	NaN	-2.58531	NaN	NaN	NaN	NaN	NaN	NaN	NaN	15.1513	7.97606	NaN	-12.5706	NaN	12.4312	3.57468	NaN	NaN	22.4812	NaN	29.1804	NaN	NaN	NaN	NaN	-4.90863	NaN	NaN	NaN	NaN	19.4478	3.85308	-1.1117	5.49997	-10.1201
	4.48374	6.55052	NaN	NaN	NaN	NaN	NaN	NaN	NaN	2.90976	-0.331915	NaN	NaN	NaN	NaN	1.7796	NaN	NaN	NaN	NaN	NaN	NaN	NaN	16.5389	6.60431	NaN	-7.99906	NaN	12.4351	3.96273	NaN	NaN	23.3661	NaN	28.818	NaN	NaN	NaN	NaN	-4.37376	NaN	NaN	NaN	NaN	20.3232	3.72464	-0.333277	5.62628	-11.4243
	3.09127	6.19132	NaN	NaN	NaN	NaN	NaN	NaN	NaN	3.86273	17.792	NaN	NaN	NaN	NaN	0.334575	NaN	NaN	NaN	NaN	NaN	NaN	NaN	14.9511	4.44386	NaN	-7.92311	NaN	10.8834	1.97407	NaN	NaN	22.3918	NaN	27.0042	NaN	NaN	NaN	NaN	-5.50622	NaN	NaN	NaN	NaN	20.9956	3.94794	-2.83725	6.14699	-11.5825
	3.23774	8.68083	NaN	NaN	NaN	NaN	NaN	NaN	NaN	5.68871	1.51433	NaN	NaN	NaN	NaN	4.064	NaN	NaN	NaN	NaN	NaN	NaN	NaN	15.8814	7.01047	NaN	-6.37025	NaN	12.4766	1.89357	NaN	NaN	23.1152	NaN	27.1361	NaN	NaN	NaN	NaN	-5.02939	NaN	NaN	NaN	NaN	22.8929	4.99318	-3.00022	6.48755	-11.5624
	0.58757	7.41729	NaN	NaN	NaN	NaN	NaN	NaN	NaN	5.4284	-4.03567	NaN	NaN	NaN	NaN	4.32228	NaN	NaN	NaN	NaN	NaN	NaN	NaN	15.8226	4.4121	NaN	-9.33209	NaN	10.1838	-1.33161	NaN	NaN	22.3899	NaN	23.2054	NaN	NaN	NaN	NaN	-5.54252	NaN	NaN	NaN	NaN	22.9907	5.08802	-3.61745	4.95017	-12.5594
	1.56497	12.2242	NaN	NaN	NaN	NaN	NaN	NaN	NaN	7.02608	-2.63784	NaN	NaN	NaN	NaN	7.17331	NaN	NaN	NaN	NaN	NaN	NaN	NaN	16.4615	5.53672	NaN	-7.94314	NaN	13.2404	-0.769355	NaN	NaN	22.4258	NaN	23.444	NaN	NaN	NaN	NaN	-5.12882	NaN	NaN	NaN	NaN	23.3214	5.73373	-3.639	5.20994	-12.7077
	-1.83059	8.75412	NaN	NaN	NaN	NaN	NaN	NaN	NaN	7.04398	-4.32003	NaN	NaN	NaN	NaN	6.55351	NaN	NaN	NaN	NaN	NaN	NaN	NaN	16.59	3.62423	NaN	-8.44871	NaN	11.6592	-2.98344	NaN	NaN	21.9805	NaN	19.7327	NaN	NaN	NaN	NaN	-5.75108	NaN	NaN	NaN	NaN	22.1388	4.45613	-4.72747	2.43479	-13.3992
	-0.890727	9.05284	NaN	NaN	NaN	NaN	NaN	NaN	NaN	8.47002	-1.64225	NaN	NaN	NaN	NaN	7.36437	NaN	NaN	NaN	NaN	NaN	NaN	NaN	20.985	3.63658	NaN	-8.09705	NaN	8.28634	-3.82314	NaN	NaN	22.4293	NaN	20.0148	NaN	NaN	NaN	NaN	-5.89501	NaN	NaN	NaN	NaN	22.6311	5.69518	-3.68125	2.44868	-13.2597
	-1.74614	8.44616	NaN	NaN	NaN	NaN	NaN	NaN	NaN	8.40231	-1.26067	NaN	NaN	NaN	NaN	6.8298	NaN	NaN	NaN	NaN	NaN	NaN	NaN	21.0469	1.83655	NaN	-6.36216	NaN	6.31763	-4.3895	NaN	NaN	22.9197	NaN	16.0838	NaN	NaN	NaN	NaN	-6.48852	NaN	NaN	NaN	NaN	20.6306	4.99544	-4.82528	-0.272883	-12.4188
	-1.56297	8.97179	NaN	NaN	NaN	NaN	NaN	NaN	NaN	9.22657	19.4236	NaN	NaN	NaN	NaN	9.95302	NaN	NaN	NaN	NaN	NaN	NaN	NaN	25.4509	2.92889	NaN	-4.23063	NaN	6.48738	-1.05048	NaN	NaN	24.2394	NaN	15.1408	NaN	NaN	NaN	NaN	-6.52927	NaN	NaN	NaN	NaN	21.1508	6.03533	-3.99079	0.821686	-11.0407
	-1.39006	8.9633	NaN	NaN	NaN	NaN	NaN	NaN	NaN	8.86294	21.6189	NaN	NaN	NaN	NaN	8.84182	NaN	NaN	NaN	NaN	NaN	NaN	NaN	25.7531	1.88901	NaN	-2.78882	NaN	2.58042	17.8512	NaN	NaN	25.18	NaN	21.5884	NaN	NaN	NaN	NaN	-6.62031	NaN	NaN	NaN	NaN	17.6733	6.44349	-5.65218	-0.496216	-10.5404
	-1.65229	9.21333	NaN	NaN	NaN	NaN	NaN	NaN	NaN	9.86047	-2.98114	NaN	NaN	NaN	NaN	10.7367	NaN	NaN	NaN	NaN	NaN	NaN	NaN	28.769	2.9588	NaN	-1.09084	NaN	2.68023	-3.40329	NaN	NaN	25.0284	NaN	8.33177	NaN	NaN	NaN	NaN	-6.55801	NaN	NaN	NaN	NaN	18.4233	7.34589	-4.24596	-0.987748	-9.50942
	-1.3658	7.38174	NaN	NaN	NaN	NaN	NaN	NaN	NaN	8.59748	-1.45146	NaN	NaN	NaN	NaN	7.66998	NaN	NaN	NaN	NaN	NaN	NaN	NaN	27.5791	3.62371	NaN	-1.53662	NaN	0.539214	-4.10632	NaN	NaN	25.4749	NaN	18.0493	NaN	NaN	NaN	NaN	-6.65112	NaN	NaN	NaN	NaN	13.8073	7.49975	-4.79573	-1.27712	-9.74637
	-0.479448	5.54696	NaN	NaN	NaN	NaN	NaN	NaN	NaN	8.61962	9.08147	NaN	NaN	NaN	NaN	9.60274	NaN	NaN	NaN	NaN	NaN	NaN	NaN	28.7721	6.2224	NaN	-1.59673	NaN	2.21368	-2.71999	NaN	NaN	25.6998	NaN	1.9584	NaN	NaN	NaN	NaN	-5.6246	NaN	NaN	NaN	NaN	14.8878	8.96025	-4.79216	-1.51789	-7.61422
	-0.218362	8.06799	NaN	NaN	NaN	NaN	NaN	NaN	NaN	6.62409	-3.35855	NaN	NaN	NaN	NaN	6.7962	NaN	NaN	NaN	NaN	NaN	NaN	NaN	28.1437	4.90616	NaN	-4.60213	NaN	-0.24565	-10.0588	NaN	NaN	25.3553	NaN	18.3646	NaN	NaN	NaN	NaN	-7.31587	NaN	NaN	NaN	NaN	11.9105	7.72991	-5.30195	-3.77808	-8.18781
	2.1039	7.00671	NaN	NaN	NaN	NaN	NaN	NaN	NaN	6.12875	-1.79846	NaN	NaN	NaN	NaN	6.19206	NaN	NaN	NaN	NaN	NaN	NaN	NaN	28.279	2.4239	NaN	-5.2241	NaN	1.62884	-8.45451	NaN	NaN	25.5035	NaN	13.7999	NaN	NaN	NaN	NaN	-6.76669	NaN	NaN	NaN	NaN	11.2441	8.24597	-3.93583	-5.0213	-6.41208
	1.07692	6.72971	NaN	NaN	NaN	NaN	NaN	NaN	NaN	4.04734	-2.48611	NaN	NaN	NaN	NaN	4.29258	NaN	NaN	NaN	NaN	NaN	NaN	NaN	27.5621	7.86448	NaN	-6.03226	NaN	1.93424	-9.8334	NaN	NaN	24.6954	NaN	11.4181	NaN	NaN	NaN	NaN	-7.12609	NaN	NaN	NaN	NaN	7.35363	8.81798	-4.98111	-5.62982	-6.2208
	3.09475	7.70672	NaN	NaN	NaN	NaN	NaN	NaN	NaN	2.33831	-0.641143	NaN	NaN	NaN	NaN	3.28733	NaN	NaN	NaN	NaN	NaN	NaN	NaN	27.8948	8.87057	NaN	-5.5328	NaN	2.95629	-9.56882	NaN	NaN	23.6178	NaN	10.1337	NaN	NaN	NaN	NaN	-7.12728	NaN	NaN	NaN	NaN	7.61785	8.79344	-3.71194	-4.17417	-6.34216
	2.74943	7.59555	NaN	NaN	NaN	NaN	NaN	NaN	NaN	-0.0593399	-1.93439	NaN	NaN	NaN	NaN	2.11757	NaN	NaN	NaN	NaN	NaN	NaN	NaN	26.108	7.72011	NaN	-6.25937	NaN	3.65462	-9.78881	NaN	NaN	21.5052	NaN	9.28504	NaN	NaN	NaN	NaN	-7.3772	NaN	NaN	NaN	NaN	5.93312	9.2073	-2.80652	-5.74174	-5.83429
	0.778487	7.39453	NaN	NaN	NaN	NaN	NaN	NaN	NaN	-0.61471	-1.29538	NaN	NaN	NaN	NaN	2.8509	NaN	NaN	NaN	NaN	NaN	NaN	NaN	26.2779	7.95979	NaN	-3.83177	NaN	2.67593	-6.82694	NaN	NaN	21.6003	NaN	8.91039	NaN	NaN	NaN	NaN	-7.2704	NaN	NaN	NaN	NaN	5.10006	10.5889	-0.807777	-5.04814	-4.62309
	-0.0919908	6.62412	NaN	NaN	NaN	NaN	NaN	NaN	NaN	-2.12063	-1.18726	NaN	NaN	NaN	NaN	1.1261	NaN	NaN	NaN	NaN	NaN	NaN	NaN	25.5625	6.90565	NaN	-2.12711	NaN	0.767769	-5.41614	NaN	NaN	20.0801	NaN	6.2811	NaN	NaN	NaN	NaN	-5.84021	NaN	NaN	NaN	NaN	2.61688	9.83648	-2.0286	-5.35266	-4.47371
	-0.605309	9.52392	NaN	NaN	NaN	NaN	NaN	NaN	NaN	-1.94068	-0.907572	NaN	NaN	NaN	NaN	1.77376	NaN	NaN	NaN	NaN	NaN	NaN	NaN	26.1233	7.30219	NaN	-0.386752	NaN	1.74495	-0.975907	NaN	NaN	20.9716	NaN	7.34614	NaN	NaN	NaN	NaN	-4.97538	NaN	NaN	NaN	NaN	4.09754	12.4416	-1.80833	-5.15377	-1.56998
	-2.44705	9.62273	NaN	NaN	NaN	NaN	NaN	NaN	NaN	-2.29216	-0.342476	NaN	NaN	NaN	NaN	0.0561116	NaN	NaN	NaN	NaN	NaN	NaN	NaN	26.2498	11.3921	NaN	-0.757723	NaN	1.99885	0.323729	NaN	NaN	21.0636	NaN	8.13376	NaN	NaN	NaN	NaN	-3.10542	NaN	NaN	NaN	NaN	5.26646	15.1654	-2.02128	-6.31973	-1.65672
	-1.39895	5.92659	NaN	NaN	NaN	NaN	NaN	NaN	NaN	-1.17159	0.913888	NaN	NaN	NaN	NaN	-1.12659	NaN	NaN	NaN	NaN	NaN	NaN	NaN	26.2386	7.83995	NaN	-1.08471	NaN	3.18153	2.11303	NaN	NaN	16.2874	NaN	9.52292	NaN	NaN	NaN	NaN	-2.01436	NaN	NaN	NaN	NaN	4.73321	18.7268	-1.80715	-8.59833	-1.13973
	-3.26314	7.00932	NaN	NaN	NaN	NaN	NaN	NaN	NaN	-2.0503	-1.22953	NaN	NaN	NaN	NaN	-4.25631	NaN	NaN	NaN	NaN	NaN	NaN	NaN	25.3457	7.43272	NaN	-1.74816	NaN	1.44164	1.68441	NaN	NaN	15.4986	NaN	12.0445	NaN	NaN	NaN	NaN	-3.01422	NaN	NaN	NaN	NaN	3.77887	18.3568	-5.28127	-7.42671	-2.11851
	-3.48408	8.07402	NaN	NaN	NaN	NaN	NaN	NaN	NaN	-0.440017	-0.495996	NaN	NaN	NaN	NaN	-4.58528	NaN	NaN	NaN	NaN	NaN	NaN	NaN	25.8866	9.99461	NaN	-1.49567	NaN	1.93447	2.72357	NaN	NaN	16.4502	NaN	14.0784	NaN	NaN	NaN	NaN	-2.91089	NaN	NaN	NaN	NaN	5.71812	19.3169	-3.79358	-9.28472	-1.73085
	-3.84599	9.57332	NaN	NaN	NaN	NaN	NaN	NaN	NaN	-0.26755	-2.06551	NaN	NaN	NaN	NaN	-8.30024	NaN	NaN	NaN	NaN	NaN	NaN	NaN	24.2337	5.34992	NaN	-0.572238	NaN	2.66824	2.63537	NaN	NaN	16.034	NaN	7.73995	NaN	NaN	NaN	NaN	-4.81778	NaN	NaN	NaN	NaN	6.0018	18.9732	-6.19166	-10.0473	-2.71284
	-2.3896	14.1374	NaN	NaN	NaN	NaN	NaN	NaN	NaN	1.28528	-2.70047	NaN	NaN	NaN	NaN	-6.19501	NaN	NaN	NaN	NaN	NaN	NaN	NaN	25.4487	5.3902	NaN	-0.921216	NaN	6.50344	2.46449	NaN	NaN	17.8085	NaN	8.82834	NaN	NaN	NaN	NaN	-4.25332	NaN	NaN	NaN	NaN	8.65613	20.6879	-5.12875	-9.2758	-3.77101
	-2.65437	13.9506	NaN	NaN	NaN	NaN	NaN	NaN	NaN	1.87448	-4.8645	NaN	NaN	NaN	NaN	-7.02706	NaN	NaN	NaN	NaN	NaN	NaN	NaN	25.2935	1.09879	NaN	-5.88446	NaN	2.31159	0.147081	NaN	NaN	18.1981	NaN	0.0427464	NaN	NaN	NaN	NaN	-5.78676	NaN	NaN	NaN	NaN	9.37486	22.2048	-7.83654	-7.61371	-2.74019
	-2.66318	14.8258	NaN	NaN	NaN	NaN	NaN	NaN	NaN	2.91647	-4.32915	NaN	NaN	NaN	NaN	-4.70812	NaN	NaN	NaN	NaN	NaN	NaN	NaN	25.5423	3.21391	NaN	-3.96624	NaN	1.68805	0.102226	NaN	NaN	20.6739	NaN	13.0614	NaN	NaN	NaN	NaN	-6.24802	NaN	NaN	NaN	NaN	13.7175	22.3757	-6.54005	-5.86894	-4.85587
	-4.41314	14.431	NaN	NaN	NaN	NaN	NaN	NaN	NaN	2.5759	-5.81578	NaN	NaN	NaN	NaN	-7.22254	NaN	NaN	NaN	NaN	NaN	NaN	NaN	20.9362	0.16018	NaN	-5.98143	NaN	3.60184	-0.733325	NaN	NaN	21.1061	NaN	5.47055	NaN	NaN	NaN	NaN	-6.9037	NaN	NaN	NaN	NaN	13.189	21.477	-10.6346	-7.00127	-6.94265
	-4.96857	15.937	NaN	NaN	NaN	NaN	NaN	NaN	NaN	4.58168	-6.07751	NaN	NaN	NaN	NaN	-4.72879	NaN	NaN	NaN	NaN	NaN	NaN	NaN	22.7227	5.37006	NaN	-6.01435	NaN	4.94512	-1.22935	NaN	NaN	25.0439	NaN	9.11658	NaN	NaN	NaN	NaN	-6.14262	NaN	NaN	NaN	NaN	16.1115	20.7998	-10.2944	-6.64791	-5.99201
	-5.20432	15.0475	NaN	NaN	NaN	NaN	NaN	NaN	NaN	3.47183	-7.02353	NaN	NaN	NaN	NaN	-6.86767	NaN	NaN	NaN	NaN	NaN	NaN	NaN	20.356	3.24449	NaN	-9.93555	NaN	3.78437	-3.82403	NaN	NaN	24.3481	NaN	11.3656	NaN	NaN	NaN	NaN	-7.63696	NaN	NaN	NaN	NaN	17.0339	17.6431	-12.3106	-6.33993	-6.74797
	-4.12966	18.1303	NaN	NaN	NaN	NaN	NaN	NaN	NaN	3.9048	-6.59789	NaN	NaN	NaN	NaN	-5.57936	NaN	NaN	NaN	NaN	NaN	NaN	NaN	20.6914	3.38191	NaN	-7.36602	NaN	6.19711	-3.05885	NaN	NaN	25.424	NaN	6.55208	NaN	NaN	NaN	NaN	-6.33476	NaN	NaN	NaN	NaN	11.5462	17.0993	-12.0557	-4.23925	-6.78838
	-1.71238	14.9743	NaN	NaN	NaN	NaN	NaN	NaN	NaN	3.47437	-7.79904	NaN	NaN	NaN	NaN	-7.41994	NaN	NaN	NaN	NaN	NaN	NaN	NaN	19.4399	0.666252	NaN	-10.3557	NaN	5.64951	-5.89747	NaN	NaN	25.3115	NaN	19.4725	NaN	NaN	NaN	NaN	-7.58841	NaN	NaN	NaN	NaN	23.8552	16.1664	-13.5295	-3.2077	-6.8108
	-1.91349	15.184	NaN	NaN	NaN	NaN	NaN	NaN	NaN	3.48649	-7.81771	NaN	NaN	NaN	NaN	-4.65432	NaN	NaN	NaN	NaN	NaN	NaN	NaN	20.179	2.77484	NaN	-9.8218	NaN	8.41624	-6.45774	NaN	NaN	26.2245	NaN	7.29357	NaN	NaN	NaN	NaN	-7.36696	NaN	NaN	NaN	NaN	25.6432	15.2242	-11.5121	-2.23094	-6.69736
	-1.37817	15.4923	NaN	NaN	NaN	NaN	NaN	NaN	NaN	3.14658	-8.81198	NaN	NaN	NaN	NaN	-7.2032	NaN	NaN	NaN	NaN	NaN	NaN	NaN	19.6355	4.30728	NaN	-10.2625	NaN	8.57725	-2.52669	NaN	NaN	25.2546	NaN	27.2123	NaN	NaN	NaN	NaN	-8.37917	NaN	NaN	NaN	NaN	25.5638	14.2632	-14.7488	-2.66204	-6.57712
	-0.235272	15.5293	NaN	NaN	NaN	NaN	NaN	NaN	NaN	3.14115	-7.9208	NaN	NaN	NaN	NaN	-3.02811	NaN	NaN	NaN	NaN	NaN	NaN	NaN	21.0617	-1.96421	NaN	-8.90501	NaN	11.3116	-3.44144	NaN	NaN	25.6811	NaN	30.2022	NaN	NaN	NaN	NaN	-8.2556	NaN	NaN	NaN	NaN	25.6648	14.3947	-13.0735	-0.697752	-6.72435
	0.37326	13.3336	NaN	NaN	NaN	NaN	NaN	NaN	NaN	2.88476	-11.8262	NaN	NaN	NaN	NaN	-5.79834	NaN	NaN	NaN	NaN	NaN	NaN	NaN	21.0638	2.02408	NaN	-8.51137	NaN	12.2631	-4.47816	NaN	NaN	23.9471	NaN	30.6181	NaN	NaN	NaN	NaN	-8.27565	NaN	NaN	NaN	NaN	23.347	14.1604	-14.008	-1.41598	-5.9048
	1.47524	13.4334	NaN	NaN	NaN	NaN	NaN	NaN	NaN	2.1388	-7.7025	NaN	NaN	NaN	NaN	-1.1576	NaN	NaN	NaN	NaN	NaN	NaN	NaN	23.4875	1.72055	NaN	-6.14802	NaN	14.3953	-6.17761	NaN	NaN	24.1071	NaN	34.7891	NaN	NaN	NaN	NaN	-9.03567	NaN	NaN	NaN	NaN	23.8984	14.7444	-13.4646	-1.55691	-4.48954
	2.33405	12.1286	NaN	NaN	NaN	NaN	NaN	NaN	NaN	2.54722	-8.31484	NaN	NaN	NaN	NaN	-3.10322	NaN	NaN	NaN	NaN	NaN	NaN	NaN	21.324	3.54106	NaN	-6.17102	NaN	14.2587	-4.49222	NaN	NaN	22.5793	NaN	34.7108	NaN	NaN	NaN	NaN	-9.17656	NaN	NaN	NaN	NaN	19.9438	15.3466	-13.1802	-0.838691	-3.85845
	4.93414	15.5108	NaN	NaN	NaN	NaN	NaN	NaN	NaN	3.65836	13.0093	NaN	NaN	NaN	NaN	-1.74791	NaN	NaN	NaN	NaN	NaN	NaN	NaN	25.5438	1.17153	NaN	-6.02302	NaN	17.9683	-2.98406	NaN	NaN	22.6618	NaN	35.534	NaN	NaN	NaN	NaN	-8.83671	NaN	NaN	NaN	NaN	19.5803	16.8314	-12.9602	-1.05306	-3.13601
	4.72984	14.4315	NaN	NaN	NaN	NaN	NaN	NaN	NaN	3.33689	12.9102	NaN	NaN	NaN	NaN	-4.33442	NaN	NaN	NaN	NaN	NaN	NaN	NaN	25.3863	-4.90522	NaN	-6.31262	NaN	19.1828	-10.3042	NaN	NaN	22.4981	NaN	31.1703	NaN	NaN	NaN	NaN	-9.82787	NaN	NaN	NaN	NaN	16.4791	16.9056	-11.9871	-1.85879	-2.92716
	5.30605	13.3835	NaN	NaN	NaN	NaN	NaN	NaN	NaN	3.54345	10.8024	NaN	NaN	NaN	NaN	-2.91273	NaN	NaN	NaN	NaN	NaN	NaN	NaN	26.2252	-4.0073	NaN	-6.12511	NaN	20.0599	-8.91783	NaN	NaN	22.5008	NaN	29.6157	NaN	NaN	NaN	NaN	-9.153	NaN	NaN	NaN	NaN	15.4958	17.3609	-9.62663	-1.07249	-2.85076
	6.00812	12.781	NaN	NaN	NaN	NaN	NaN	NaN	NaN	2.92393	9.82219	NaN	NaN	NaN	NaN	-2.62174	NaN	NaN	NaN	NaN	NaN	NaN	NaN	25.6895	2.6308	NaN	-6.4362	NaN	16.3729	-9.68117	NaN	NaN	22.1359	NaN	34.75	NaN	NaN	NaN	NaN	-10.0685	NaN	NaN	NaN	NaN	12.8447	16.4025	-9.35927	0.45349	-2.47626
	8.43519	13.8197	NaN	NaN	NaN	NaN	NaN	NaN	NaN	3.10989	2.34721	NaN	NaN	NaN	NaN	-2.25345	NaN	NaN	NaN	NaN	NaN	NaN	NaN	26.5864	2.3563	NaN	-4.81799	NaN	19.9407	-8.80906	NaN	NaN	22.1388	NaN	16.7364	NaN	NaN	NaN	NaN	-10.28	NaN	NaN	NaN	NaN	12.628	16.7462	-6.35169	-1.02025	-1.19463
	7.75029	14.9711	NaN	NaN	NaN	NaN	NaN	NaN	NaN	2.33803	12.9597	NaN	NaN	NaN	NaN	-1.96262	NaN	NaN	NaN	NaN	NaN	NaN	NaN	26.0407	-3.29251	NaN	-3.21434	NaN	19.5189	-7.81047	NaN	NaN	20.6093	NaN	33.3521	NaN	NaN	NaN	NaN	-10.3039	NaN	NaN	NaN	NaN	8.32964	15.7316	-8.94154	-2.06739	0.164129
	9.83254	9.286	NaN	NaN	NaN	NaN	NaN	NaN	NaN	2.19694	7.61576	NaN	NaN	NaN	NaN	0.686299	NaN	NaN	NaN	NaN	NaN	NaN	NaN	26.9932	-4.45626	NaN	-1.11617	NaN	19.5886	-6.41675	NaN	NaN	21.0069	NaN	10.0646	NaN	NaN	NaN	NaN	-10.3189	NaN	NaN	NaN	NaN	8.70049	16.0446	-8.14411	-0.669995	0.59605
	10.3069	8.28002	NaN	NaN	NaN	NaN	NaN	NaN	NaN	1.93305	9.59802	NaN	NaN	NaN	NaN	-1.46403	NaN	NaN	NaN	NaN	NaN	NaN	NaN	26.9313	18.3228	NaN	0.272944	NaN	16.5756	-4.97085	NaN	NaN	19.055	NaN	32.1828	NaN	NaN	NaN	NaN	-10.4918	NaN	NaN	NaN	NaN	7.01946	14.1541	-9.94412	-1.24169	0.951543
	10.4499	8.73512	NaN	NaN	NaN	NaN	NaN	NaN	NaN	2.129	6.0847	NaN	NaN	NaN	NaN	-0.424317	NaN	NaN	NaN	NaN	NaN	NaN	NaN	28.4156	19.2073	NaN	2.32029	NaN	17.4925	-3.28638	NaN	NaN	19.7931	NaN	15.7412	NaN	NaN	NaN	NaN	-10.368	NaN	NaN	NaN	NaN	9.24976	14.2233	-9.99326	-1.81769	0.483539
	10.4504	7.96857	NaN	NaN	NaN	NaN	NaN	NaN	NaN	1.59209	7.65348	NaN	NaN	NaN	NaN	-0.586185	NaN	NaN	NaN	NaN	NaN	NaN	NaN	28.5998	18.9916	NaN	2.21197	NaN	18.3234	-3.41826	NaN	NaN	16.6232	NaN	-0.700411	NaN	NaN	NaN	NaN	-11.554	NaN	NaN	NaN	NaN	6.5229	11.3702	-11.1662	-3.0455	1.25843
	10.251	10.4775	NaN	NaN	NaN	NaN	NaN	NaN	NaN	3.19692	10.2878	NaN	NaN	NaN	NaN	0.135695	NaN	NaN	NaN	NaN	NaN	NaN	NaN	30.1431	-3.87439	NaN	2.08589	NaN	23.0256	-2.41826	NaN	NaN	16.0923	NaN	-2.11568	NaN	NaN	NaN	NaN	-10.5507	NaN	NaN	NaN	NaN	8.12255	11.7737	-11.7069	-3.45571	0.235974
	12.2069	13.2078	NaN	NaN	NaN	NaN	NaN	NaN	NaN	3.97089	8.60689	NaN	NaN	NaN	NaN	-0.0331626	NaN	NaN	NaN	NaN	NaN	NaN	NaN	30.2166	-1.97701	NaN	0.364231	NaN	24.9132	-3.8159	NaN	NaN	14.6409	NaN	-3.91397	NaN	NaN	NaN	NaN	-10.5539	NaN	NaN	NaN	NaN	6.63019	9.49189	-9.94033	-4.66499	-0.00671173
	9.87167	12.0977	NaN	NaN	NaN	NaN	NaN	NaN	NaN	4.80478	15.1602	NaN	NaN	NaN	NaN	-1.93187	NaN	NaN	NaN	NaN	NaN	NaN	NaN	30.6264	-0.110106	NaN	1.29662	NaN	28.1882	-4.12861	NaN	NaN	12.3896	NaN	-5.85498	NaN	NaN	NaN	NaN	-10.4461	NaN	NaN	NaN	NaN	7.75717	14.1887	-7.70452	-4.16876	-1.906
	7.9538	15.4702	NaN	NaN	NaN	NaN	NaN	NaN	NaN	4.9407	16.7171	NaN	NaN	NaN	NaN	-2.39745	NaN	NaN	NaN	NaN	NaN	NaN	NaN	31.4381	-0.952294	NaN	-0.105509	NaN	26.7192	14.8635	NaN	NaN	10.9218	NaN	0.245403	NaN	NaN	NaN	NaN	-10.642	NaN	NaN	NaN	NaN	7.12782	2.0691	-8.60755	-6.06819	-0.944416
	8.43331	16.4589	NaN	NaN	NaN	NaN	NaN	NaN	NaN	8.37285	8.97061	NaN	NaN	NaN	NaN	-0.225245	NaN	NaN	NaN	NaN	NaN	NaN	NaN	34.4604	-0.129092	NaN	-1.50763	NaN	27.068	15.1284	NaN	NaN	11.4341	NaN	10.1597	NaN	NaN	NaN	NaN	-9.32935	NaN	NaN	NaN	NaN	9.6005	2.43878	-5.38171	-5.3837	-0.939561
	7.78668	15.4049	NaN	NaN	NaN	NaN	NaN	NaN	NaN	7.91462	9.44732	NaN	NaN	NaN	NaN	1.83431	NaN	NaN	NaN	NaN	NaN	NaN	NaN	32.4808	1.20992	NaN	-2.90976	NaN	26.3041	14.0315	NaN	NaN	10.5905	NaN	8.3686	NaN	NaN	NaN	NaN	-10.3589	NaN	NaN	NaN	NaN	8.54464	-0.0678371	-6.09471	-5.32057	-0.812052
	7.62532	15.5258	NaN	NaN	NaN	NaN	NaN	NaN	NaN	11.1477	11.8836	NaN	NaN	NaN	NaN	4.47174	NaN	NaN	NaN	NaN	NaN	NaN	NaN	35.7202	1.65067	NaN	-1.30122	NaN	26.0812	16.0402	NaN	NaN	13.2022	NaN	8.82644	NaN	NaN	NaN	NaN	-9.83245	NaN	NaN	NaN	NaN	11.6074	0.432875	-6.92031	-4.39745	-1.36344
	5.87808	14.1714	NaN	NaN	NaN	NaN	NaN	NaN	NaN	11.8747	-1.95281	NaN	NaN	NaN	NaN	3.65013	NaN	NaN	NaN	NaN	NaN	NaN	NaN	34.4615	-0.245572	NaN	-0.821181	NaN	27.4537	15.1612	NaN	NaN	12.5398	NaN	7.87604	NaN	NaN	NaN	NaN	-10.1896	NaN	NaN	NaN	NaN	9.17683	-0.783154	-8.46042	-6.14329	1.58644
	6.63184	14.7022	NaN	NaN	NaN	NaN	NaN	NaN	NaN	14.7679	-2.3285	NaN	NaN	NaN	NaN	5.1312	NaN	NaN	NaN	NaN	NaN	NaN	NaN	35.3088	0.750969	NaN	0.573374	NaN	21.3547	15.669	NaN	NaN	15.0946	NaN	8.22656	NaN	NaN	NaN	NaN	-9.23717	NaN	NaN	NaN	NaN	11.4513	1.16403	-8.53189	-6.51144	1.75084
	5.78388	14.3466	NaN	NaN	NaN	NaN	NaN	NaN	NaN	15.0665	-4.01107	NaN	NaN	NaN	NaN	3.23598	NaN	NaN	NaN	NaN	NaN	NaN	NaN	34.7744	-2.62272	NaN	-0.380415	NaN	19.7572	12.221	NaN	NaN	10.6606	NaN	7.37287	NaN	NaN	NaN	NaN	-8.68724	NaN	NaN	NaN	NaN	8.58852	0.909842	-9.8046	-6.42641	1.92735
	6.59108	14.6041	NaN	NaN	NaN	NaN	NaN	NaN	NaN	15.9045	-4.2889	NaN	NaN	NaN	NaN	3.32693	NaN	NaN	NaN	NaN	NaN	NaN	NaN	34.7521	-0.512591	NaN	-2.23616	NaN	22.306	11.8187	NaN	NaN	12.8165	NaN	7.98707	NaN	NaN	NaN	NaN	-7.39649	NaN	NaN	NaN	NaN	7.31568	1.23875	-9.64479	-6.0524	1.73721
	5.02342	13.1126	NaN	NaN	NaN	NaN	NaN	NaN	NaN	15.1809	-6.42067	NaN	NaN	NaN	NaN	2.26918	NaN	NaN	NaN	NaN	NaN	NaN	NaN	33.8371	-2.19839	NaN	-2.03889	NaN	23.0015	11.9077	NaN	NaN	12.6359	NaN	8.24417	NaN	NaN	NaN	NaN	-8.31518	NaN	NaN	NaN	NaN	6.14062	0.689176	-11.0778	-6.68914	1.38265
	5.87814	12.8414	NaN	NaN	NaN	NaN	NaN	NaN	NaN	15.4995	-7.42816	NaN	NaN	NaN	NaN	2.84728	NaN	NaN	NaN	NaN	NaN	NaN	NaN	33.79	-2.17487	NaN	-1.41945	NaN	24.739	11.9522	NaN	NaN	13.8671	NaN	8.62015	NaN	NaN	NaN	NaN	-7.82932	NaN	NaN	NaN	NaN	8.108	1.58714	-9.5277	-4.65758	0.9436
	4.55329	10.4405	NaN	NaN	NaN	NaN	NaN	NaN	NaN	13.3432	-3.16978	NaN	NaN	NaN	NaN	-1.23906	NaN	NaN	NaN	NaN	NaN	NaN	NaN	32.7633	-3.60488	NaN	-2.59219	NaN	23.0197	11.3941	NaN	NaN	13.4284	NaN	9.06488	NaN	NaN	NaN	NaN	-8.23729	NaN	NaN	NaN	NaN	5.43013	3.08349	-10.6357	-8.20379	-0.858239
	4.69881	10.8651	NaN	NaN	NaN	NaN	NaN	NaN	NaN	12.7639	17.0776	NaN	NaN	NaN	NaN	0.832704	NaN	NaN	NaN	NaN	NaN	NaN	NaN	34.0299	-1.79088	NaN	-1.52477	NaN	23.5967	10.8409	NaN	NaN	16.2379	NaN	7.67997	NaN	NaN	NaN	NaN	-6.99126	NaN	NaN	NaN	NaN	6.95672	4.80878	-8.69929	-7.41532	-1.22544
	3.71291	8.38656	NaN	NaN	NaN	NaN	NaN	NaN	NaN	10.8018	18.4966	NaN	NaN	NaN	NaN	-3.44368	NaN	NaN	NaN	NaN	NaN	NaN	NaN	34.777	-3.86394	NaN	-1.76714	NaN	20.2319	12.0484	NaN	NaN	15.5768	NaN	-8.755	NaN	NaN	NaN	NaN	-6.25371	NaN	NaN	NaN	NaN	7.29964	5.75096	-9.60268	-8.83385	-1.02073
	3.9874	7.61571	NaN	NaN	NaN	NaN	NaN	NaN	NaN	10.1799	17.2918	NaN	NaN	NaN	NaN	-1.44774	NaN	NaN	NaN	NaN	NaN	NaN	NaN	36.3231	-3.13517	NaN	-0.291826	NaN	21.6844	11.9299	NaN	NaN	17.36	NaN	8.43216	NaN	NaN	NaN	NaN	-4.15229	NaN	NaN	NaN	NaN	7.38433	8.79937	-9.67681	-8.40051	-0.229779
	3.33382	7.09748	NaN	NaN	NaN	NaN	NaN	NaN	NaN	8.04828	16.7325	NaN	NaN	NaN	NaN	-3.7317	NaN	NaN	NaN	NaN	NaN	NaN	NaN	35.3624	-3.28557	NaN	-1.72675	NaN	21.9092	-7.05216	NaN	NaN	15.5824	NaN	9.47905	NaN	NaN	NaN	NaN	-4.20088	NaN	NaN	NaN	NaN	6.31669	8.01596	-10.8907	-8.85325	-2.55731
	3.95774	7.30387	NaN	NaN	NaN	NaN	NaN	NaN	NaN	7.26018	6.95392	NaN	NaN	NaN	NaN	-1.57191	NaN	NaN	NaN	NaN	NaN	NaN	NaN	35.4321	-1.49831	NaN	-0.482445	NaN	23.5357	-4.73765	NaN	NaN	18.0207	NaN	9.04374	NaN	NaN	NaN	NaN	-3.27045	NaN	NaN	NaN	NaN	7.32375	9.97171	-11.2104	-9.7036	-2.42316
	3.08843	6.47127	NaN	NaN	NaN	NaN	NaN	NaN	NaN	5.38681	17.7871	NaN	NaN	NaN	NaN	-1.30549	NaN	NaN	NaN	NaN	NaN	NaN	NaN	34.636	-4.09127	NaN	-0.541717	NaN	22.6067	-5.56133	NaN	NaN	17.5599	NaN	8.932	NaN	NaN	NaN	NaN	-3.5733	NaN	NaN	NaN	NaN	5.59663	8.39212	-11.951	-9.74643	-3.72013
	4.01702	8.00113	NaN	NaN	NaN	NaN	NaN	NaN	NaN	4.76155	17.8942	NaN	NaN	NaN	NaN	-6.5848	NaN	NaN	NaN	NaN	NaN	NaN	NaN	35.5659	-3.26351	NaN	-0.282834	NaN	23.2145	-7.47773	NaN	NaN	18.0177	NaN	7.99651	NaN	NaN	NaN	NaN	-2.86571	NaN	NaN	NaN	NaN	6.4319	9.0813	-10.4079	-9.69592	-2.78061
	5.33176	7.3566	NaN	NaN	NaN	NaN	NaN	NaN	NaN	0.67188	17.0122	NaN	NaN	NaN	NaN	-8.70833	NaN	NaN	NaN	NaN	NaN	NaN	NaN	34.2659	-7.15616	NaN	-0.989491	NaN	22.0391	-10.3629	NaN	NaN	17.6521	NaN	6.29613	NaN	NaN	NaN	NaN	-2.99452	NaN	NaN	NaN	NaN	7.70372	6.91701	-11.1549	-6.16278	-4.22673
	5.56516	5.63019	NaN	NaN	NaN	NaN	NaN	NaN	NaN	-0.262353	13.8426	NaN	NaN	NaN	NaN	-5.73153	NaN	NaN	NaN	NaN	NaN	NaN	NaN	34.1672	-6.2451	NaN	1.3085	NaN	21.5651	-12.3238	NaN	NaN	17.405	NaN	6.15601	NaN	NaN	NaN	NaN	-2.40609	NaN	NaN	NaN	NaN	7.93597	6.46955	-10.2883	-4.47843	-4.43945
	5.03382	4.48793	NaN	NaN	NaN	NaN	NaN	NaN	NaN	-2.27147	13.8143	NaN	NaN	NaN	NaN	-4.93131	NaN	NaN	NaN	NaN	NaN	NaN	NaN	31.8687	-2.79479	NaN	0.785461	NaN	16.6518	-5.14949	NaN	NaN	16.7047	NaN	4.79319	NaN	NaN	NaN	NaN	-3.29383	NaN	NaN	NaN	NaN	7.9557	6.32587	-12.0315	-3.66267	-5.64311
	5.03456	5.74203	NaN	NaN	NaN	NaN	NaN	NaN	NaN	-2.28818	17.8407	NaN	NaN	NaN	NaN	-2.8226	NaN	NaN	NaN	NaN	NaN	NaN	NaN	32.4662	9.4032	NaN	1.5122	NaN	16.4608	-6.51953	NaN	NaN	17.1954	NaN	5.54649	NaN	NaN	NaN	NaN	-2.92701	NaN	NaN	NaN	NaN	9.80555	6.18269	-9.8382	0.917347	-6.21167
	5.04512	4.28906	NaN	NaN	NaN	NaN	NaN	NaN	NaN	-3.20129	17.4532	NaN	NaN	NaN	NaN	-4.21922	NaN	NaN	NaN	NaN	NaN	NaN	NaN	30.7494	8.30421	NaN	0.238052	NaN	13.9814	-8.92034	NaN	NaN	16.1481	NaN	0.910737	NaN	NaN	NaN	NaN	-3.23426	NaN	NaN	NaN	NaN	7.06781	6.37263	-11.4275	0.816632	-8.36428
	4.73741	5.22132	NaN	NaN	NaN	NaN	NaN	NaN	NaN	-3.34334	15.4274	NaN	NaN	NaN	NaN	-0.921933	NaN	NaN	NaN	NaN	NaN	NaN	NaN	32.098	10.5995	NaN	2.94342	NaN	13.7015	6.27414	NaN	NaN	16.477	NaN	-0.8475	NaN	NaN	NaN	NaN	-1.96445	NaN	NaN	NaN	NaN	7.81984	7.49768	-10.2473	3.50324	-8.65088
	5.22812	5.24866	NaN	NaN	NaN	NaN	NaN	NaN	NaN	-5.08648	13.8284	NaN	NaN	NaN	NaN	-4.59051	NaN	NaN	NaN	NaN	NaN	NaN	NaN	31.6146	-4.51994	NaN	2.03775	NaN	13.0497	5.69531	NaN	NaN	15.7928	NaN	-2.78957	NaN	NaN	NaN	NaN	-3.10336	NaN	NaN	NaN	NaN	5.41328	7.13723	-11.0912	4.35811	-6.44051
	4.44151	6.89816	NaN	NaN	NaN	NaN	NaN	NaN	NaN	-5.17326	15.8275	NaN	NaN	NaN	NaN	-1.38727	NaN	NaN	NaN	NaN	NaN	NaN	NaN	31.3717	3.30421	NaN	3.06216	NaN	14.3083	6.38389	NaN	NaN	15.2838	NaN	-1.69809	NaN	NaN	NaN	NaN	-3.44604	NaN	NaN	NaN	NaN	6.66346	8.54327	-9.02245	7.89735	-8.04701
	3.70429	7.64907	NaN	NaN	NaN	NaN	NaN	NaN	NaN	-6.67887	17.6469	NaN	NaN	NaN	NaN	-2.59655	NaN	NaN	NaN	NaN	NaN	NaN	NaN	28.1972	8.85371	NaN	2.24162	NaN	11.4801	5.4069	NaN	NaN	14.1215	NaN	-3.62932	NaN	NaN	NaN	NaN	-3.70709	NaN	NaN	NaN	NaN	2.80373	8.74028	-7.89714	9.49099	-9.44271
	4.15221	8.7044	NaN	NaN	NaN	NaN	NaN	NaN	NaN	-5.44898	9.90107	NaN	NaN	NaN	NaN	-1.69287	NaN	NaN	NaN	NaN	NaN	NaN	NaN	27.7085	9.45186	NaN	2.73753	NaN	13.7168	4.75745	NaN	NaN	13.9309	NaN	-5.05093	NaN	NaN	NaN	NaN	-3.50118	NaN	NaN	NaN	NaN	2.78177	9.34857	-4.7036	12.0884	-10.3465
	3.52622	10.1789	NaN	NaN	NaN	NaN	NaN	NaN	NaN	-7.61223	14.6279	NaN	NaN	NaN	NaN	0.456794	NaN	NaN	NaN	NaN	NaN	NaN	NaN	26.1149	3.03978	NaN	2.76739	NaN	13.2703	3.0818	NaN	NaN	12.2236	NaN	-1.8621	NaN	NaN	NaN	NaN	-4.60331	NaN	NaN	NaN	NaN	2.99068	10.3725	-0.209721	13.4659	-11.7204
	1.69999	7.51643	NaN	NaN	NaN	NaN	NaN	NaN	NaN	-8.85099	-9.40206	NaN	NaN	NaN	NaN	4.24443	NaN	NaN	NaN	NaN	NaN	NaN	NaN	25.0184	-0.607867	NaN	-0.387309	NaN	9.44135	2.36314	NaN	NaN	12.2894	NaN	-0.748249	NaN	NaN	NaN	NaN	-4.74266	NaN	NaN	NaN	NaN	3.2194	11.4391	0.0703361	15.809	-12.9728
	1.40522	5.97665	NaN	NaN	NaN	NaN	NaN	NaN	NaN	-9.5364	-10.5836	NaN	NaN	NaN	NaN	-1.99191	NaN	NaN	NaN	NaN	NaN	NaN	NaN	22.6131	6.16064	NaN	-1.83638	NaN	6.12574	1.71108	NaN	NaN	11.2186	NaN	-1.18811	NaN	NaN	NaN	NaN	-5.23915	NaN	NaN	NaN	NaN	1.85549	11.6926	-2.65317	14.5906	-13.0251
	1.45942	6.00374	NaN	NaN	NaN	NaN	NaN	NaN	NaN	-7.7142	13.774	NaN	NaN	NaN	NaN	1.13754	NaN	NaN	NaN	NaN	NaN	NaN	NaN	22.1853	8.19538	NaN	-1.68701	NaN	8.91979	2.6042	NaN	NaN	11.5753	NaN	-0.169993	NaN	NaN	NaN	NaN	-3.30066	NaN	NaN	NaN	NaN	2.29924	13.2282	-0.316641	15.0428	-13.8607
	-0.269506	4.80227	NaN	NaN	NaN	NaN	NaN	NaN	NaN	-7.63689	-6.72714	NaN	NaN	NaN	NaN	-2.38686	NaN	NaN	NaN	NaN	NaN	NaN	NaN	21.3026	5.90236	NaN	-3.96599	NaN	7.7966	2.36251	NaN	NaN	10.5716	NaN	1.42761	NaN	NaN	NaN	NaN	-3.30724	NaN	NaN	NaN	NaN	1.95418	13.9726	-3.09332	16.2774	-12.9774
	0.867693	6.19156	NaN	NaN	NaN	NaN	NaN	NaN	NaN	-6.07067	-5.96442	NaN	NaN	NaN	NaN	-1.60996	NaN	NaN	NaN	NaN	NaN	NaN	NaN	22.4737	9.90884	NaN	-3.13847	NaN	11.9232	3.35864	NaN	NaN	12.337	NaN	2.28682	NaN	NaN	NaN	NaN	-1.5906	NaN	NaN	NaN	NaN	2.19517	16.223	-2.97286	15.5702	-11.6113
	0.961375	5.0712	NaN	NaN	NaN	NaN	NaN	NaN	NaN	-5.3063	-8.82905	NaN	NaN	NaN	NaN	-4.05702	NaN	NaN	NaN	NaN	NaN	NaN	NaN	19.4959	8.50865	NaN	-6.07108	NaN	11.498	3.90626	NaN	NaN	12.1058	NaN	3.6563	NaN	NaN	NaN	NaN	-2.67565	NaN	NaN	NaN	NaN	0.404288	16.1055	-4.24549	16.0347	-12.1542
	2.26663	7.15057	NaN	NaN	NaN	NaN	NaN	NaN	NaN	-3.56913	-9.97203	NaN	NaN	NaN	NaN	-4.05701	NaN	NaN	NaN	NaN	NaN	NaN	NaN	20.9325	7.17801	NaN	-4.89676	NaN	13.0003	4.52966	NaN	NaN	12.988	NaN	4.64305	NaN	NaN	NaN	NaN	-1.58415	NaN	NaN	NaN	NaN	2.38273	15.1626	-3.22222	18.0744	-11.1961
	3.0965	3.70554	NaN	NaN	NaN	NaN	NaN	NaN	NaN	-3.85769	3.52343	NaN	NaN	NaN	NaN	-5.06718	NaN	NaN	NaN	NaN	NaN	NaN	NaN	16.9631	7.04887	NaN	-6.62518	NaN	9.33365	4.21982	NaN	NaN	10.4663	NaN	4.55476	NaN	NaN	NaN	NaN	-1.93143	NaN	NaN	NaN	NaN	2.17714	14.2879	-4.96636	18.4036	-11.7716
	4.87069	6.60185	NaN	NaN	NaN	NaN	NaN	NaN	NaN	-2.91142	-6.34578	NaN	NaN	NaN	NaN	-1.46117	NaN	NaN	NaN	NaN	NaN	NaN	NaN	16.8926	7.9056	NaN	-6.43472	NaN	8.25991	5.30216	NaN	NaN	10.8725	NaN	4.56468	NaN	NaN	NaN	NaN	-1.31886	NaN	NaN	NaN	NaN	4.38147	14.1829	-3.7708	21.1627	-11.8404
	4.15899	3.11983	NaN	NaN	NaN	NaN	NaN	NaN	NaN	-2.60134	-7.39673	NaN	NaN	NaN	NaN	-3.07141	NaN	NaN	NaN	NaN	NaN	NaN	NaN	16.4922	-7.0212	NaN	-8.47763	NaN	3.56056	6.56154	NaN	NaN	8.34671	NaN	2.04348	NaN	NaN	NaN	NaN	-1.79548	NaN	NaN	NaN	NaN	4.39571	12.7341	-4.64585	20.2574	-12.2802
	4.67604	3.42788	NaN	NaN	NaN	NaN	NaN	NaN	NaN	-2.45101	-9.40054	NaN	NaN	NaN	NaN	-4.05702	NaN	NaN	NaN	NaN	NaN	NaN	NaN	16.8971	-2.79023	NaN	-7.43543	NaN	4.62866	7.98807	NaN	NaN	9.52604	NaN	2.69087	NaN	NaN	NaN	NaN	-1.52239	NaN	NaN	NaN	NaN	5.494	13.2101	-2.9415	19.1441	-13.3619
	4.52247	-0.592662	NaN	NaN	NaN	NaN	NaN	NaN	NaN	-2.17369	-9.23624	NaN	NaN	NaN	NaN	2.35688	NaN	NaN	NaN	NaN	NaN	NaN	NaN	17.1869	-1.86908	NaN	-8.38553	NaN	1.14638	7.22213	NaN	NaN	6.57686	NaN	1.53821	NaN	NaN	NaN	NaN	-2.45594	NaN	NaN	NaN	NaN	4.48247	11.4316	-4.39208	17.1139	-12.6083
	5.57884	1.32558	NaN	NaN	NaN	NaN	NaN	NaN	NaN	-1.14679	-8.50206	NaN	NaN	NaN	NaN	6.11543	NaN	NaN	NaN	NaN	NaN	NaN	NaN	17.9001	7.47723	NaN	-6.74833	NaN	2.4701	8.83858	NaN	NaN	7.39809	NaN	0.138767	NaN	NaN	NaN	NaN	-0.474478	NaN	NaN	NaN	NaN	3.70219	13.3307	-4.07652	15.5651	-11.908
	6.18855	1.91361	NaN	NaN	NaN	NaN	NaN	NaN	NaN	-1.85908	-9.07124	NaN	NaN	NaN	NaN	4.17915	NaN	NaN	NaN	NaN	NaN	NaN	NaN	15.6139	5.84232	NaN	-8.13824	NaN	-0.245419	8.29214	NaN	NaN	3.71405	NaN	-0.333952	NaN	NaN	NaN	NaN	-2.65497	NaN	NaN	NaN	NaN	2.05383	12.8042	-4.54706	12.4449	-11.0708
	7.50472	4.02281	NaN	NaN	NaN	NaN	NaN	NaN	NaN	-1.35148	-9.47755	NaN	NaN	NaN	NaN	6.2258	NaN	NaN	NaN	NaN	NaN	NaN	NaN	15.7779	-4.90571	NaN	-8.75774	NaN	0.846543	8.11444	NaN	NaN	4.01519	NaN	-0.628178	NaN	NaN	NaN	NaN	-3.00684	NaN	NaN	NaN	NaN	1.92058	13.043	-3.94027	10.7756	-9.62888
	7.04037	2.18166	NaN	NaN	NaN	NaN	NaN	NaN	NaN	-1.9505	-10.522	NaN	NaN	NaN	NaN	4.87996	NaN	NaN	NaN	NaN	NaN	NaN	NaN	14.0389	12.8037	NaN	-9.51634	NaN	-1.14598	8.09109	NaN	NaN	1.78766	NaN	-0.0975153	NaN	NaN	NaN	NaN	-2.3514	NaN	NaN	NaN	NaN	-0.497603	12.4813	-5.83176	9.00591	-8.95836
	8.07632	0.366458	NaN	NaN	NaN	NaN	NaN	NaN	NaN	-2.04042	-11.29	NaN	NaN	NaN	NaN	5.01104	NaN	NaN	NaN	NaN	NaN	NaN	NaN	12.9761	14.8451	NaN	-7.51693	NaN	1.07353	8.80708	NaN	NaN	0.93999	NaN	0.963967	NaN	NaN	NaN	NaN	-1.38793	NaN	NaN	NaN	NaN	-0.299952	11.7172	-5.3251	9.53543	-10.6849
	5.31462	1.61959	NaN	NaN	NaN	NaN	NaN	NaN	NaN	-2.15848	-8.78665	NaN	NaN	NaN	NaN	2.5043	NaN	NaN	NaN	NaN	NaN	NaN	NaN	16.757	14.6339	NaN	-8.87288	NaN	0.451734	8.99411	NaN	NaN	-2.89268	NaN	0.937822	NaN	NaN	NaN	NaN	-1.55532	NaN	NaN	NaN	NaN	-0.828649	10.2287	-5.7141	6.32092	-8.99576
	5.39465	2.96821	NaN	NaN	NaN	NaN	NaN	NaN	NaN	-1.93704	-9.2744	NaN	NaN	NaN	NaN	1.99899	NaN	NaN	NaN	NaN	NaN	NaN	NaN	8.8675	15.3458	NaN	-8.35081	NaN	1.2862	8.81217	NaN	NaN	-3.50643	NaN	3.27084	NaN	NaN	NaN	NaN	-0.264818	NaN	NaN	NaN	NaN	-0.839237	10.2702	-4.60199	9.5099	-8.35655
	1.51909	3.10224	NaN	NaN	NaN	NaN	NaN	NaN	NaN	-2.35624	-9.99976	NaN	NaN	NaN	NaN	-0.5266	NaN	NaN	NaN	NaN	NaN	NaN	NaN	8.58523	12.4223	NaN	-10.2726	NaN	0.0323384	9.08161	NaN	NaN	-5.17263	NaN	2.21085	NaN	NaN	NaN	NaN	1.13151	NaN	NaN	NaN	NaN	-2.51486	10.1667	-5.21745	9.43585	-6.86646
	1.02289	1.27406	NaN	NaN	NaN	NaN	NaN	NaN	NaN	-1.02206	13.8391	NaN	NaN	NaN	NaN	0.965273	NaN	NaN	NaN	NaN	NaN	NaN	NaN	7.20242	13.2656	NaN	-7.97787	NaN	0.582541	11.1231	NaN	NaN	-4.61106	NaN	2.98035	NaN	NaN	NaN	NaN	2.70093	NaN	NaN	NaN	NaN	-3.40968	10.1914	-3.76559	9.87547	-5.24177
	-2.0586	0.993026	NaN	NaN	NaN	NaN	NaN	NaN	NaN	-0.748422	13.0325	NaN	NaN	NaN	NaN	0.395533	NaN	NaN	NaN	NaN	NaN	NaN	NaN	7.89248	11.2459	NaN	-11.2182	NaN	0.447354	14.0513	NaN	NaN	-5.08926	NaN	1.35476	NaN	NaN	NaN	NaN	4.0421	NaN	NaN	NaN	NaN	-5.90143	9.38567	-4.81715	9.7427	-3.32975
	-3.59881	2.51083	NaN	NaN	NaN	NaN	NaN	NaN	NaN	1.12885	12.7492	NaN	NaN	NaN	NaN	0.63983	NaN	NaN	NaN	NaN	NaN	NaN	NaN	8.97919	14.9898	NaN	-10.708	NaN	1.75103	8.90314	NaN	NaN	-4.7473	NaN	2.33566	NaN	NaN	NaN	NaN	5.80102	NaN	NaN	NaN	NaN	-6.19295	11.2995	-4.1125	9.19641	-1.95435
	-3.73085	3.26115	NaN	NaN	NaN	NaN	NaN	NaN	NaN	0.658643	14.0684	NaN	NaN	NaN	NaN	-0.718539	NaN	NaN	NaN	NaN	NaN	NaN	NaN	8.50877	12.6724	NaN	-12.6781	NaN	0.399509	-8.3291	NaN	NaN	-4.84288	NaN	1.8069	NaN	NaN	NaN	NaN	5.31666	NaN	NaN	NaN	NaN	-8.2119	10.9338	-3.81306	10.3033	-2.82946
	-2.83887	4.54569	NaN	NaN	NaN	NaN	NaN	NaN	NaN	1.63426	13.8326	NaN	NaN	NaN	NaN	-0.296633	NaN	NaN	NaN	NaN	NaN	NaN	NaN	8.68449	13.907	NaN	-12.3815	NaN	1.96152	-6.21883	NaN	NaN	-4.60277	NaN	1.36174	NaN	NaN	NaN	NaN	6.29091	NaN	NaN	NaN	NaN	-8.89042	11.5741	-2.88056	11.9459	-1.02472
	-2.76208	4.85929	NaN	NaN	NaN	NaN	NaN	NaN	NaN	0.43071	12.9658	NaN	NaN	NaN	NaN	-3.17515	NaN	NaN	NaN	NaN	NaN	NaN	NaN	7.3669	10.9794	NaN	-13.2891	NaN	0.635762	-6.03884	NaN	NaN	-4.16249	NaN	1.0851	NaN	NaN	NaN	NaN	6.12717	NaN	NaN	NaN	NaN	-11.8656	10.9354	-3.2094	11.3347	-3.39745
	-1.80663	1.75193	NaN	NaN	NaN	NaN	NaN	NaN	NaN	0.754843	14.5996	NaN	NaN	NaN	NaN	-1.43812	NaN	NaN	NaN	NaN	NaN	NaN	NaN	7.90267	11.9663	NaN	-13.1723	NaN	1.67421	-4.81686	NaN	NaN	-0.911931	NaN	1.23003	NaN	NaN	NaN	NaN	6.16794	NaN	NaN	NaN	NaN	-11.6516	11.136	-1.86143	12.3627	-3.48355
	-2.38044	2.88599	NaN	NaN	NaN	NaN	NaN	NaN	NaN	0.760745	15.4902	NaN	NaN	NaN	NaN	-3.6872	NaN	NaN	NaN	NaN	NaN	NaN	NaN	7.1551	8.21734	NaN	-13.8745	NaN	0.233094	-7.3683	NaN	NaN	-2.21421	NaN	1.24862	NaN	NaN	NaN	NaN	6.1412	NaN	NaN	NaN	NaN	-12.1928	10.7337	-2.85297	10.9025	-5.88157
	-3.03762	10.9287	NaN	NaN	NaN	NaN	NaN	NaN	NaN	0.681133	15.2256	NaN	NaN	NaN	NaN	0.00672729	NaN	NaN	NaN	NaN	NaN	NaN	NaN	8.38851	7.7399	NaN	-12.8408	NaN	0.418739	-7.20345	NaN	NaN	1.43647	NaN	2.22793	NaN	NaN	NaN	NaN	6.03973	NaN	NaN	NaN	NaN	-11.1274	10.5798	-0.806769	10.7879	-6.52382
	-3.83396	9.05534	NaN	NaN	NaN	NaN	NaN	NaN	NaN	1.43984	13.3992	NaN	NaN	NaN	NaN	-1.41069	NaN	NaN	NaN	NaN	NaN	NaN	NaN	8.30027	7.29554	NaN	-10.7674	NaN	-1.0061	-6.00951	NaN	NaN	1.14187	NaN	2.46038	NaN	NaN	NaN	NaN	5.82872	NaN	NaN	NaN	NaN	-8.24465	11.1584	-1.57188	9.52613	-6.41761
	-5.91424	8.48127	NaN	NaN	NaN	NaN	NaN	NaN	NaN	1.77867	-1.27101	NaN	NaN	NaN	NaN	1.68016	NaN	NaN	NaN	NaN	NaN	NaN	NaN	10.8121	6.86212	NaN	-10.956	NaN	-0.269347	-6.96714	NaN	NaN	1.5432	NaN	4.02711	NaN	NaN	NaN	NaN	3.85364	NaN	NaN	NaN	NaN	-6.43728	10.0571	-2.19095	6.64378	-6.10308
	-6.20135	7.91347	NaN	NaN	NaN	NaN	NaN	NaN	NaN	0.652307	-1.73541	NaN	NaN	NaN	NaN	-1.25311	NaN	NaN	NaN	NaN	NaN	NaN	NaN	9.69566	2.22426	NaN	-11.6063	NaN	-1.19679	-8.19853	NaN	NaN	0.306967	NaN	5.41225	NaN	NaN	NaN	NaN	1.75886	NaN	NaN	NaN	NaN	-7.81446	10.3697	-2.74885	3.54625	-7.52122
	-5.76045	8.19437	NaN	NaN	NaN	NaN	NaN	NaN	NaN	0.0262034	-0.631287	NaN	NaN	NaN	NaN	2.08695	NaN	NaN	NaN	NaN	NaN	NaN	NaN	11.6063	4.30665	NaN	-10.4743	NaN	3.52593	-8.87046	NaN	NaN	0.461112	NaN	5.37761	NaN	NaN	NaN	NaN	1.58907	NaN	NaN	NaN	NaN	-6.8202	11.149	-2.18055	2.89402	-7.00846
	-6.04794	6.91251	NaN	NaN	NaN	NaN	NaN	NaN	NaN	-1.71449	-2.39729	NaN	NaN	NaN	NaN	0.162936	NaN	NaN	NaN	NaN	NaN	NaN	NaN	10.398	1.37319	NaN	-11.9093	NaN	3.49346	-8.57239	NaN	NaN	0.120132	NaN	5.29538	NaN	NaN	NaN	NaN	0.540859	NaN	NaN	NaN	NaN	-7.65875	9.20444	-1.26213	4.26266	-7.63994
	-5.82188	8.24788	NaN	NaN	NaN	NaN	NaN	NaN	NaN	-2.20774	-3.00788	NaN	NaN	NaN	NaN	0.681295	NaN	NaN	NaN	NaN	NaN	NaN	NaN	10.0734	2.85533	NaN	-11.3249	NaN	3.75437	-8.38359	NaN	NaN	0.668726	NaN	5.58531	NaN	NaN	NaN	NaN	0.769146	NaN	NaN	NaN	NaN	-7.95812	9.26511	1.22274	2.7346	-8.37885
	-5.43174	6.19003	NaN	NaN	NaN	NaN	NaN	NaN	NaN	-2.38884	-3.5552	NaN	NaN	NaN	NaN	-2.06204	NaN	NaN	NaN	NaN	NaN	NaN	NaN	7.28213	0.0444383	NaN	-11.5049	NaN	0.588327	-10.1439	NaN	NaN	0.392095	NaN	6.1631	NaN	NaN	NaN	NaN	-0.622201	NaN	NaN	NaN	NaN	-9.215	6.69902	1.0729	3.69667	-9.84806
	-3.94591	7.32515	NaN	NaN	NaN	NaN	NaN	NaN	NaN	-2.53602	-4.48742	NaN	NaN	NaN	NaN	-0.925932	NaN	NaN	NaN	NaN	NaN	NaN	NaN	6.98595	-0.144021	NaN	-9.90005	NaN	0.0764321	-9.83932	NaN	NaN	1.67182	NaN	6.44197	NaN	NaN	NaN	NaN	-0.686736	NaN	NaN	NaN	NaN	-7.40443	6.55394	0.704803	4.66354	-10.4512
	-4.60904	5.02229	NaN	NaN	NaN	NaN	NaN	NaN	NaN	-3.24223	-1.51429	NaN	NaN	NaN	NaN	0.135968	NaN	NaN	NaN	NaN	NaN	NaN	NaN	5.921	-1.43416	NaN	-8.94207	NaN	-1.43771	-8.72142	NaN	NaN	2.03024	NaN	6.76384	NaN	NaN	NaN	NaN	-1.63611	NaN	NaN	NaN	NaN	-8.52172	3.37576	0.0762183	3.44226	-11.0001
	-4.69909	4.17104	NaN	NaN	NaN	NaN	NaN	NaN	NaN	-2.70143	-2.70259	NaN	NaN	NaN	NaN	0.422115	NaN	NaN	NaN	NaN	NaN	NaN	NaN	6.58366	-1.39665	NaN	-7.34617	NaN	-2.54986	-8.47799	NaN	NaN	2.29987	NaN	7.66231	NaN	NaN	NaN	NaN	-0.280439	NaN	NaN	NaN	NaN	-7.99068	2.91814	-0.236474	4.87543	-11.2113
	-5.03538	3.01974	NaN	NaN	NaN	NaN	NaN	NaN	NaN	-3.08429	-6.32926	NaN	NaN	NaN	NaN	5.85688	NaN	NaN	NaN	NaN	NaN	NaN	NaN	5.88765	-1.50231	NaN	-7.44529	NaN	-2.4269	-10.9121	NaN	NaN	1.36649	NaN	5.45021	NaN	NaN	NaN	NaN	-1.95298	NaN	NaN	NaN	NaN	-7.60462	-0.699663	-0.62486	5.01549	-12.5307
	-5.17364	3.5064	NaN	NaN	NaN	NaN	NaN	NaN	NaN	-1.75843	-5.78271	NaN	NaN	NaN	NaN	7.48366	NaN	NaN	NaN	NaN	NaN	NaN	NaN	7.27869	0.27244	NaN	-6.45136	NaN	-0.0952038	-10.4684	NaN	NaN	1.36575	NaN	5.03469	NaN	NaN	NaN	NaN	-0.747345	NaN	NaN	NaN	NaN	-4.74821	-0.10032	-1.30669	4.86287	-10.8812
	-5.68116	3.09252	NaN	NaN	NaN	NaN	NaN	NaN	NaN	-1.49748	-8.20219	NaN	NaN	NaN	NaN	6.45738	NaN	NaN	NaN	NaN	NaN	NaN	NaN	6.80764	-0.789092	NaN	-6.37698	NaN	-0.598919	-11.2624	NaN	NaN	0.987585	NaN	6.04242	NaN	NaN	NaN	NaN	-1.55228	NaN	NaN	NaN	NaN	-6.38727	-2.33148	-2.14659	3.03349	-12.587
	-4.33824	2.48635	NaN	NaN	NaN	NaN	NaN	NaN	NaN	0.136347	-10.2225	NaN	NaN	NaN	NaN	7.4567	NaN	NaN	NaN	NaN	NaN	NaN	NaN	8.75383	-1.41541	NaN	-6.37309	NaN	1.8632	-10.7205	NaN	NaN	0.789187	NaN	6.70141	NaN	NaN	NaN	NaN	-0.723662	NaN	NaN	NaN	NaN	-5.16569	-2.03461	-3.12826	2.70416	-12.0202
	-4.973	0.349681	NaN	NaN	NaN	NaN	NaN	NaN	NaN	-1.13829	-10.4755	NaN	NaN	NaN	NaN	6.10372	NaN	NaN	NaN	NaN	NaN	NaN	NaN	8.23183	-5.20312	NaN	-6.45549	NaN	1.79408	-12.1562	NaN	NaN	-0.977071	NaN	6.33336	NaN	NaN	NaN	NaN	-2.58501	NaN	NaN	NaN	NaN	-5.85587	-3.23613	-3.16087	1.67661	-12.2333
	-3.92719	3.26307	NaN	NaN	NaN	NaN	NaN	NaN	NaN	-0.394714	-10.9742	NaN	NaN	NaN	NaN	8.43953	NaN	NaN	NaN	NaN	NaN	NaN	NaN	8.28142	-5.18086	NaN	-5.77173	NaN	2.93441	-12.7032	NaN	NaN	-1.28456	NaN	6.65285	NaN	NaN	NaN	NaN	-2.9136	NaN	NaN	NaN	NaN	-5.0376	-3.66138	-1.79216	2.29881	-12.6392
	-4.65372	3.29946	NaN	NaN	NaN	NaN	NaN	NaN	NaN	-0.670636	-12.5134	NaN	NaN	NaN	NaN	6.94647	NaN	NaN	NaN	NaN	NaN	NaN	NaN	7.80524	-6.24776	NaN	-6.69375	NaN	3.1375	-13.7705	NaN	NaN	-2.78639	NaN	7.11046	NaN	NaN	NaN	NaN	-4.31509	NaN	NaN	NaN	NaN	-7.52476	-4.15512	-1.64156	0.679401	-13.0378
	-3.8331	2.78943	NaN	NaN	NaN	NaN	NaN	NaN	NaN	-0.382511	-12.0666	NaN	NaN	NaN	NaN	8.97007	NaN	NaN	NaN	NaN	NaN	NaN	NaN	7.86994	-5.82825	NaN	-6.2556	NaN	7.89278	-10.9914	NaN	NaN	-2.22226	NaN	7.21451	NaN	NaN	NaN	NaN	-4.77726	NaN	NaN	NaN	NaN	-5.34776	-4.18418	1.67024	2.19063	-12.5726
	-4.08403	1.41802	NaN	NaN	NaN	NaN	NaN	NaN	NaN	-0.701079	-10.349	NaN	NaN	NaN	NaN	7.01935	NaN	NaN	NaN	NaN	NaN	NaN	NaN	6.73243	-3.30927	NaN	-8.48799	NaN	7.18653	10.2174	NaN	NaN	-2.60278	NaN	5.16923	NaN	NaN	NaN	NaN	-6.05143	NaN	NaN	NaN	NaN	-5.17758	-4.22555	1.85489	0.903756	-11.9902
	-3.43404	1.19997	NaN	NaN	NaN	NaN	NaN	NaN	NaN	-0.792909	-10.7248	NaN	NaN	NaN	NaN	8.54152	NaN	NaN	NaN	NaN	NaN	NaN	NaN	7.37548	-5.19199	NaN	-6.82533	NaN	8.76539	10.0285	NaN	NaN	-1.96391	NaN	6.49311	NaN	NaN	NaN	NaN	-5.82513	NaN	NaN	NaN	NaN	-5.53834	-3.12627	5.08984	0.240775	-11.4727
	-4.42039	-0.535874	NaN	NaN	NaN	NaN	NaN	NaN	NaN	-0.958786	-11.7438	NaN	NaN	NaN	NaN	4.7339	NaN	NaN	NaN	NaN	NaN	NaN	NaN	6.17777	-6.09789	NaN	-9.64582	NaN	7.27551	10.3994	NaN	NaN	-2.23617	NaN	6.88165	NaN	NaN	NaN	NaN	-6.52921	NaN	NaN	NaN	NaN	-6.00277	-1.68988	3.9991	-1.4281	-11.6476
	-4.32964	-0.0632768	NaN	NaN	NaN	NaN	NaN	NaN	NaN	-0.965271	-12.29	NaN	NaN	NaN	NaN	4.9844	NaN	NaN	NaN	NaN	NaN	NaN	NaN	8.53569	-6.038	NaN	-10.5327	NaN	7.03391	8.01252	NaN	NaN	-1.86947	NaN	1.86958	NaN	NaN	NaN	NaN	-6.05971	NaN	NaN	NaN	NaN	-5.37774	1.06151	6.50345	-1.59968	-11.1558
	-5.98559	-3.62031	NaN	NaN	NaN	NaN	NaN	NaN	NaN	-0.642901	-11.2078	NaN	NaN	NaN	NaN	1.93916	NaN	NaN	NaN	NaN	NaN	NaN	NaN	7.30118	-4.08139	NaN	-13.9233	NaN	5.7517	7.42268	NaN	NaN	-2.23974	NaN	0.0701854	NaN	NaN	NaN	NaN	-7.29205	NaN	NaN	NaN	NaN	-4.3108	2.27289	8.171	-2.48411	-9.66616
	-5.30763	1.30899	NaN	NaN	NaN	NaN	NaN	NaN	NaN	-0.0242638	12.5133	NaN	NaN	NaN	NaN	2.72524	NaN	NaN	NaN	NaN	NaN	NaN	NaN	4.51923	-1.43771	NaN	-13.0894	NaN	8.82454	10.1229	NaN	NaN	-1.14071	NaN	0.0288677	NaN	NaN	NaN	NaN	-7.03109	NaN	NaN	NaN	NaN	-5.15927	6.13852	11.6827	-1.97142	-10.5962
	-6.82143	0.332046	NaN	NaN	NaN	NaN	NaN	NaN	NaN	-0.773241	13.6682	NaN	NaN	NaN	NaN	0.762891	NaN	NaN	NaN	NaN	NaN	NaN	NaN	2.64388	-1.74907	NaN	-15.4477	NaN	5.45673	10.2139	NaN	NaN	0.0199659	NaN	-1.8985	NaN	NaN	NaN	NaN	-7.41598	NaN	NaN	NaN	NaN	-5.10417	6.51503	12.9499	-0.679068	-10.5067
	-5.99422	-0.299575	NaN	NaN	NaN	NaN	NaN	NaN	NaN	-0.657471	13.73	NaN	NaN	NaN	NaN	0.888158	NaN	NaN	NaN	NaN	NaN	NaN	NaN	2.29977	-1.44298	NaN	-15.1742	NaN	6.79867	9.20594	NaN	NaN	1.60411	NaN	-2.84186	NaN	NaN	NaN	NaN	-6.8051	NaN	NaN	NaN	NaN	-4.88287	7.16031	16.8722	1.23037	-10.0556
	-6.87857	-1.84179	NaN	NaN	NaN	NaN	NaN	NaN	NaN	-0.361408	13.3521	NaN	NaN	NaN	NaN	-1.20875	NaN	NaN	NaN	NaN	NaN	NaN	NaN	-0.0513167	-2.38085	NaN	-14.663	NaN	7.30758	7.7176	NaN	NaN	2.35397	NaN	-3.65815	NaN	NaN	NaN	NaN	-6.88807	NaN	NaN	NaN	NaN	-6.56237	8.05197	17.5739	2.01333	-9.81334
	-5.81678	-3.16674	NaN	NaN	NaN	NaN	NaN	NaN	NaN	0.208169	0.652731	NaN	NaN	NaN	NaN	1.54075	NaN	NaN	NaN	NaN	NaN	NaN	NaN	0.195274	-0.681173	NaN	-14.5075	NaN	7.87148	6.6402	NaN	NaN	4.84072	NaN	-3.46918	NaN	NaN	NaN	NaN	-6.63847	NaN	NaN	NaN	NaN	-6.3436	10.2863	21.5934	5.88794	-9.79501
	-6.22879	-7.31739	NaN	NaN	NaN	NaN	NaN	NaN	NaN	1.06235	-8.71337	NaN	NaN	NaN	NaN	-1.48805	NaN	NaN	NaN	NaN	NaN	NaN	NaN	-0.641776	-2.71928	NaN	-14.2717	NaN	8.06928	7.93367	NaN	NaN	2.9623	NaN	-4.98293	NaN	NaN	NaN	NaN	-6.19756	NaN	NaN	NaN	NaN	-8.19057	9.81063	20.6084	6.54267	-10.5883
	-6.20049	-7.41247	NaN	NaN	NaN	NaN	NaN	NaN	NaN	2.53856	-6.27868	NaN	NaN	NaN	NaN	1.09269	NaN	NaN	NaN	NaN	NaN	NaN	NaN	-0.282655	0.941771	NaN	-12.1541	NaN	9.27989	9.70992	NaN	NaN	3.55096	NaN	-1.56433	NaN	NaN	NaN	NaN	-5.0925	NaN	NaN	NaN	NaN	-9.62825	11.3018	20.7519	9.14068	-10.7092
	-5.41553	-6.49063	NaN	NaN	NaN	NaN	NaN	NaN	NaN	5.39084	-6.39589	NaN	NaN	NaN	NaN	-0.265259	NaN	NaN	NaN	NaN	NaN	NaN	NaN	0.896563	2.73738	NaN	-13.307	NaN	7.00752	-14.0054	NaN	NaN	3.16369	NaN	-3.83091	NaN	NaN	NaN	NaN	-3.82281	NaN	NaN	NaN	NaN	-10.7605	11.6098	20.4757	10.6827	-10.2438
	-6.3089	-7.89558	NaN	NaN	NaN	NaN	NaN	NaN	NaN	6.67476	-9.05034	NaN	NaN	NaN	NaN	1.57817	NaN	NaN	NaN	NaN	NaN	NaN	NaN	2.72727	-1.53101	NaN	-13.3513	NaN	8.43819	7.1789	NaN	NaN	3.59734	NaN	-4.74076	NaN	NaN	NaN	NaN	-3.72244	NaN	NaN	NaN	NaN	-15.1558	9.67225	19.5837	3.95064	-10.706
	-5.74655	-8.73216	NaN	NaN	NaN	NaN	NaN	NaN	NaN	6.8166	-4.03032	NaN	NaN	NaN	NaN	0.766876	NaN	NaN	NaN	NaN	NaN	NaN	NaN	2.62235	4.8448	NaN	-12.0591	NaN	6.65046	9.65823	NaN	NaN	-1.61276	NaN	-4.40228	NaN	NaN	NaN	NaN	-4.38254	NaN	NaN	NaN	NaN	-14.1186	7.37481	13.1115	6.21531	-12.0114
	-3.18695	-4.84625	NaN	NaN	NaN	NaN	NaN	NaN	NaN	7.48028	-7.49602	NaN	NaN	NaN	NaN	1.3501	NaN	NaN	NaN	NaN	NaN	NaN	NaN	2.25523	4.84862	NaN	-11.7708	NaN	7.48213	10.4998	NaN	NaN	-0.730506	NaN	-3.27465	NaN	NaN	NaN	NaN	-3.43906	NaN	NaN	NaN	NaN	-13.7494	5.86169	13.8232	7.84167	-12.0374
	-3.29096	-4.6995	NaN	NaN	NaN	NaN	NaN	NaN	NaN	6.61317	-8.18658	NaN	NaN	NaN	NaN	-0.581987	NaN	NaN	NaN	NaN	NaN	NaN	NaN	2.22547	3.70585	NaN	-11.0937	NaN	6.55421	9.08432	NaN	NaN	0.113562	NaN	-2.73209	NaN	NaN	NaN	NaN	-3.94076	NaN	NaN	NaN	NaN	-14.4601	11.4558	13.0395	15.9282	-11.4802
	-0.968272	-7.19311	NaN	NaN	NaN	NaN	NaN	NaN	NaN	6.94183	-6.44774	NaN	NaN	NaN	NaN	2.26123	NaN	NaN	NaN	NaN	NaN	NaN	NaN	2.50668	3.26449	NaN	-7.94845	NaN	6.48222	8.19516	NaN	NaN	3.72346	NaN	-0.222432	NaN	NaN	NaN	NaN	-3.48397	NaN	NaN	NaN	NaN	-10.9885	-1.46829	14.7336	17.2289	-10.2897
	-0.75204	-8.31387	NaN	NaN	NaN	NaN	NaN	NaN	NaN	6.41057	-6.0292	NaN	NaN	NaN	NaN	0.429694	NaN	NaN	NaN	NaN	NaN	NaN	NaN	2.62865	1.9146	NaN	-4.80269	NaN	3.54637	8.84851	NaN	NaN	2.95941	NaN	-0.377433	NaN	NaN	NaN	NaN	-4.29673	NaN	NaN	NaN	NaN	-11.202	-4.41069	15.7793	17.2338	-8.44604
	1.71791	-2.99994	NaN	NaN	NaN	NaN	NaN	NaN	NaN	6.55683	-3.16608	NaN	NaN	NaN	NaN	4.75865	NaN	NaN	NaN	NaN	NaN	NaN	NaN	3.10205	2.72887	NaN	-1.58194	NaN	4.29776	8.2236	NaN	NaN	5.08784	NaN	-0.409031	NaN	NaN	NaN	NaN	-4.55995	NaN	NaN	NaN	NaN	-8.86252	-5.62895	16.0672	18.2364	-6.37607
	1.55366	-2.73825	NaN	NaN	NaN	NaN	NaN	NaN	NaN	5.11918	-3.10414	NaN	NaN	NaN	NaN	1.45249	NaN	NaN	NaN	NaN	NaN	NaN	NaN	4.25685	1.35014	NaN	-2.62674	NaN	4.51113	8.03751	NaN	NaN	3.97098	NaN	-2.05298	NaN	NaN	NaN	NaN	-4.35126	NaN	NaN	NaN	NaN	-9.22709	-8.3042	14.1911	15.2818	-3.47403
	2.29086	-1.32029	NaN	NaN	NaN	NaN	NaN	NaN	NaN	5.47368	-1.78922	NaN	NaN	NaN	NaN	3.12089	NaN	NaN	NaN	NaN	NaN	NaN	NaN	5.17398	3.83038	NaN	-0.891301	NaN	4.77174	6.98596	NaN	NaN	2.81802	NaN	-1.26549	NaN	NaN	NaN	NaN	-3.20108	NaN	NaN	NaN	NaN	-7.65434	-7.57548	13.3717	13.7278	1.11313
	1.52585	0.840301	NaN	NaN	NaN	NaN	NaN	NaN	NaN	2.28887	-4.66691	NaN	NaN	NaN	NaN	0.558756	NaN	NaN	NaN	NaN	NaN	NaN	NaN	5.68627	0.815965	NaN	-3.58594	NaN	2.78433	7.22104	NaN	NaN	1.25954	NaN	-3.53912	NaN	NaN	NaN	NaN	-3.82688	NaN	NaN	NaN	NaN	-8.72477	-9.68235	8.89195	10.1866	1.41006
	3.1989	4.32687	NaN	NaN	NaN	NaN	NaN	NaN	NaN	2.42532	-7.76239	NaN	NaN	NaN	NaN	-0.0692251	NaN	NaN	NaN	NaN	NaN	NaN	NaN	5.47777	4.46557	NaN	-2.33503	NaN	3.04368	5.74908	NaN	NaN	1.147	NaN	-3.56384	NaN	NaN	NaN	NaN	-3.62852	NaN	NaN	NaN	NaN	-4.41537	-9.84547	8.07575	9.88286	2.97434
	1.75326	4.96397	NaN	NaN	NaN	NaN	NaN	NaN	NaN	0.442024	-3.13511	NaN	NaN	NaN	NaN	3.10557	NaN	NaN	NaN	NaN	NaN	NaN	NaN	5.34375	-0.080861	NaN	-5.64607	NaN	2.43935	4.31591	NaN	NaN	-1.236	NaN	-4.66917	NaN	NaN	NaN	NaN	-4.18827	NaN	NaN	NaN	NaN	-3.60512	-12.6337	6.0783	8.17639	4.76608
	3.09968	-2.02927	NaN	NaN	NaN	NaN	NaN	NaN	NaN	0.318777	12.8208	NaN	NaN	NaN	NaN	-6.7247	NaN	NaN	NaN	NaN	NaN	NaN	NaN	5.51483	0.453003	NaN	-4.44947	NaN	3.31309	4.18886	NaN	NaN	-1.25313	NaN	-3.45313	NaN	NaN	NaN	NaN	-3.63727	NaN	NaN	NaN	NaN	-8.44071	-12.1612	8.26915	9.39572	4.91757
	2.9631	7.00802	NaN	NaN	NaN	NaN	NaN	NaN	NaN	-2.83757	12.7921	NaN	NaN	NaN	NaN	-9.51571	NaN	NaN	NaN	NaN	NaN	NaN	NaN	5.22566	-3.18226	NaN	-5.03408	NaN	1.50506	2.34693	NaN	NaN	-1.83828	NaN	-4.39384	NaN	NaN	NaN	NaN	-4.95317	NaN	NaN	NaN	NaN	4.37805	-12.8839	5.29591	6.18656	5.94746
	4.11944	11.635	NaN	NaN	NaN	NaN	NaN	NaN	NaN	-2.7591	13.8101	NaN	NaN	NaN	NaN	-7.63384	NaN	NaN	NaN	NaN	NaN	NaN	NaN	5.02203	-1.42336	NaN	-4.06689	NaN	2.49113	3.06819	NaN	NaN	-0.91992	NaN	-4.99314	NaN	NaN	NaN	NaN	-5.37788	NaN	NaN	NaN	NaN	6.74385	-13.2534	7.55825	7.00888	5.83924
	2.65711	9.90186	NaN	NaN	NaN	NaN	NaN	NaN	NaN	-4.90877	12.8902	NaN	NaN	NaN	NaN	-10.65	NaN	NaN	NaN	NaN	NaN	NaN	NaN	4.84682	-5.21997	NaN	-4.81771	NaN	2.10813	0.907451	NaN	NaN	0.36451	NaN	-4.96979	NaN	NaN	NaN	NaN	-6.51064	NaN	NaN	NaN	NaN	8.49608	-14.2663	3.7942	4.69684	6.56192
	2.35023	11.8527	NaN	NaN	NaN	NaN	NaN	NaN	NaN	-5.48953	15.1866	NaN	NaN	NaN	NaN	-1.80957	NaN	NaN	NaN	NaN	NaN	NaN	NaN	5.28143	-0.841562	NaN	-2.60661	NaN	3.19856	2.67536	NaN	NaN	2.76118	NaN	-4.20269	NaN	NaN	NaN	NaN	-6.8685	NaN	NaN	NaN	NaN	8.07514	-13.2896	5.34597	4.21471	8.10534
	1.54817	10.8782	NaN	NaN	NaN	NaN	NaN	NaN	NaN	-7.32715	14.8727	NaN	NaN	NaN	NaN	-10.532	NaN	NaN	NaN	NaN	NaN	NaN	NaN	5.14638	-1.36463	NaN	-4.35955	NaN	3.34589	1.74974	NaN	NaN	2.616	NaN	-3.55673	NaN	NaN	NaN	NaN	-9.97648	NaN	NaN	NaN	NaN	4.2945	-13.3203	2.42333	2.20642	8.61981
	1.71039	11.2625	NaN	NaN	NaN	NaN	NaN	NaN	NaN	-6.90231	15.7933	NaN	NaN	NaN	NaN	-8.85752	NaN	NaN	NaN	NaN	NaN	NaN	NaN	6.21181	-3.71712	NaN	-2.60129	NaN	3.44378	2.83949	NaN	NaN	3.39565	NaN	-3.72519	NaN	NaN	NaN	NaN	-9.33718	NaN	NaN	NaN	NaN	5.9284	-11.0507	1.31298	2.77392	9.78413
	-1.5357	9.63865	NaN	NaN	NaN	NaN	NaN	NaN	NaN	-8.88458	15.5927	NaN	NaN	NaN	NaN	-10.3247	NaN	NaN	NaN	NaN	NaN	NaN	NaN	4.10601	-6.94635	NaN	-2.711	NaN	2.51563	0.976942	NaN	NaN	2.67568	NaN	-1.78285	NaN	NaN	NaN	NaN	-11.933	NaN	NaN	NaN	NaN	3.30519	-10.3831	-1.82213	-0.472201	10.116
	-2.29577	9.77314	NaN	NaN	NaN	NaN	NaN	NaN	NaN	-8.67417	16.1127	NaN	NaN	NaN	NaN	-9.30111	NaN	NaN	NaN	NaN	NaN	NaN	NaN	5.3848	-5.83731	NaN	-2.58949	NaN	2.90606	1.27671	NaN	NaN	2.57468	NaN	-0.976757	NaN	NaN	NaN	NaN	-10.5281	NaN	NaN	NaN	NaN	5.5567	-7.53879	-0.997992	1.10826	7.33363
	-4.24008	8.06016	NaN	NaN	NaN	NaN	NaN	NaN	NaN	-9.46242	15.7224	NaN	NaN	NaN	NaN	-8.31439	NaN	NaN	NaN	NaN	NaN	NaN	NaN	3.70448	-9.06421	NaN	-2.89142	NaN	2.09509	0.827605	NaN	NaN	2.50831	NaN	0.761687	NaN	NaN	NaN	NaN	-12.9224	NaN	NaN	NaN	NaN	3.294	-7.07218	-3.67368	0.206762	8.36257
	-3.88252	9.00223	NaN	NaN	NaN	NaN	NaN	NaN	NaN	-9.54045	14.9854	NaN	NaN	NaN	NaN	-9.69476	NaN	NaN	NaN	NaN	NaN	NaN	NaN	3.18244	-2.54088	NaN	-1.45514	NaN	1.71415	0.997154	NaN	NaN	2.04311	NaN	1.06832	NaN	NaN	NaN	NaN	-13.608	NaN	NaN	NaN	NaN	3.84114	-4.88144	-3.25448	-0.950175	14.1616
	-5.31067	8.33046	NaN	NaN	NaN	NaN	NaN	NaN	NaN	-9.32578	16.4085	NaN	NaN	NaN	NaN	-2.8239	NaN	NaN	NaN	NaN	NaN	NaN	NaN	1.21868	7.47408	NaN	-2.0268	NaN	-0.267937	0.0784921	NaN	NaN	2.10931	NaN	2.35167	NaN	NaN	NaN	NaN	-14.1597	NaN	NaN	NaN	NaN	2.88543	-4.54209	-3.64418	-0.451569	14.2396
	-4.37976	8.81938	NaN	NaN	NaN	NaN	NaN	NaN	NaN	-8.70793	15.8527	NaN	NaN	NaN	NaN	-1.24422	NaN	NaN	NaN	NaN	NaN	NaN	NaN	0.696199	6.55169	NaN	1.48404	NaN	-0.121319	-0.226568	NaN	NaN	3.45742	NaN	4.62866	NaN	NaN	NaN	NaN	-14.1989	NaN	NaN	NaN	NaN	4.15637	-3.12115	-3.27586	0.356851	16.9081
	-5.49534	6.57762	NaN	NaN	NaN	NaN	NaN	NaN	NaN	-7.70808	15.9175	NaN	NaN	NaN	NaN	-1.11248	NaN	NaN	NaN	NaN	NaN	NaN	NaN	0.431125	4.61251	NaN	1.99106	NaN	-3.04388	-0.0637847	NaN	NaN	2.27186	NaN	5.27727	NaN	NaN	NaN	NaN	-14.3797	NaN	NaN	NaN	NaN	3.15765	-1.97267	-4.13132	0.491312	16.6281
	-5.42007	5.76221	NaN	NaN	NaN	NaN	NaN	NaN	NaN	-4.22753	15.3539	NaN	NaN	NaN	NaN	-9.00458	NaN	NaN	NaN	NaN	NaN	NaN	NaN	0.644979	-5.80255	NaN	2.48141	NaN	-3.78352	0.0561196	NaN	NaN	3.88898	NaN	6.16063	NaN	NaN	NaN	NaN	-13.9796	NaN	NaN	NaN	NaN	4.74062	1.97366	-1.8713	1.21511	18.2506
	-4.66951	1.58694	NaN	NaN	NaN	NaN	NaN	NaN	NaN	-2.23284	-8.24594	NaN	NaN	NaN	NaN	0.741149	NaN	NaN	NaN	NaN	NaN	NaN	NaN	-0.031285	2.4666	NaN	0.586925	NaN	-4.61977	1.94647	NaN	NaN	2.44192	NaN	6.04095	NaN	NaN	NaN	NaN	-13.4201	NaN	NaN	NaN	NaN	4.8726	5.12087	-3.54845	0.368254	17.8412
	-3.6855	1.47821	NaN	NaN	NaN	NaN	NaN	NaN	NaN	1.76058	-7.65505	NaN	NaN	NaN	NaN	4.05991	NaN	NaN	NaN	NaN	NaN	NaN	NaN	1.337	6.25124	NaN	0.930419	NaN	-3.52218	4.32101	NaN	NaN	2.35129	NaN	6.82011	NaN	NaN	NaN	NaN	-11.9458	NaN	NaN	NaN	NaN	5.29554	9.93959	-2.43709	0.255722	15.9222
	-1.72763	-1.24504	NaN	NaN	NaN	NaN	NaN	NaN	NaN	2.79371	-7.70081	NaN	NaN	NaN	NaN	2.02164	NaN	NaN	NaN	NaN	NaN	NaN	NaN	0.832461	4.63369	NaN	-1.52841	NaN	-3.45038	5.28536	NaN	NaN	1.12466	NaN	7.07923	NaN	NaN	NaN	NaN	-11.9532	NaN	NaN	NaN	NaN	5.49677	11.8872	-2.5351	-0.827045	16.7681
	0.174607	6.16992	NaN	NaN	NaN	NaN	NaN	NaN	NaN	5.03845	15.6357	NaN	NaN	NaN	NaN	-1.34289	NaN	NaN	NaN	NaN	NaN	NaN	NaN	-1.27366	-0.595018	NaN	2.23624	NaN	-2.87225	6.12576	NaN	NaN	0.0997315	NaN	7.52548	NaN	NaN	NaN	NaN	-11.68	NaN	NaN	NaN	NaN	5.71809	14.234	-1.63883	-3.59707	17.4394
	0.647507	3.67458	NaN	NaN	NaN	NaN	NaN	NaN	NaN	4.62665	13.8082	NaN	NaN	NaN	NaN	-2.32313	NaN	NaN	NaN	NaN	NaN	NaN	NaN	-3.10978	-0.265422	NaN	-6.32912	NaN	-5.18655	6.85657	NaN	NaN	-1.06275	NaN	8.99948	NaN	NaN	NaN	NaN	-10.5988	NaN	NaN	NaN	NaN	4.40201	14.9139	-3.02832	-4.13353	13.0172
	2.04671	1.53257	NaN	NaN	NaN	NaN	NaN	NaN	NaN	4.3901	16.0382	NaN	NaN	NaN	NaN	-0.48062	NaN	NaN	NaN	NaN	NaN	NaN	NaN	-3.91674	-1.26739	NaN	-8.87042	NaN	-5.73618	9.88212	NaN	NaN	0.634719	NaN	12.5433	NaN	NaN	NaN	NaN	-9.80402	NaN	NaN	NaN	NaN	8.32049	17.7656	1.5747	-3.44262	13.0729
	1.41036	0.116583	NaN	NaN	NaN	NaN	NaN	NaN	NaN	4.06243	15.3526	NaN	NaN	NaN	NaN	1.35111	NaN	NaN	NaN	NaN	NaN	NaN	NaN	-7.62842	-2.00787	NaN	-10.3395	NaN	-6.151	10.5813	NaN	NaN	-0.21562	NaN	13.2037	NaN	NaN	NaN	NaN	-9.99997	NaN	NaN	NaN	NaN	5.50021	18.8927	0.55477	-3.95834	12.6211
	2.90423	0.543205	NaN	NaN	NaN	NaN	NaN	NaN	NaN	5.38113	14.1796	NaN	NaN	NaN	NaN	6.12875	NaN	NaN	NaN	NaN	NaN	NaN	NaN	-7.91432	-2.68857	NaN	-9.25599	NaN	-4.32056	5.70556	NaN	NaN	0.420269	NaN	7.30236	NaN	NaN	NaN	NaN	-8.83502	NaN	NaN	NaN	NaN	8.97953	19.9457	3.10662	-3.12171	12.2747
	1.97936	4.92225	NaN	NaN	NaN	NaN	NaN	NaN	NaN	5.18025	14.7492	NaN	NaN	NaN	NaN	5.4332	NaN	NaN	NaN	NaN	NaN	NaN	NaN	-9.15653	-3.98775	NaN	-10.9376	NaN	-5.04361	6.49116	NaN	NaN	1.0367	NaN	-2.37414	NaN	NaN	NaN	NaN	-8.9416	NaN	NaN	NaN	NaN	10.3906	19.1678	1.93138	-2.48759	10.5848
	1.70997	-2.56908	NaN	NaN	NaN	NaN	NaN	NaN	NaN	6.75837	14.9232	NaN	NaN	NaN	NaN	8.22653	NaN	NaN	NaN	NaN	NaN	NaN	NaN	-8.92678	-2.98432	NaN	-10.3324	NaN	-0.909023	8.36935	NaN	NaN	1.17811	NaN	1.10669	NaN	NaN	NaN	NaN	-8.24043	NaN	NaN	NaN	NaN	9.78033	19.0853	3.99358	-3.186	10.7642
	2.47725	-3.20394	NaN	NaN	NaN	NaN	NaN	NaN	NaN	7.12741	-9.4901	NaN	NaN	NaN	NaN	5.46151	NaN	NaN	NaN	NaN	NaN	NaN	NaN	-10.4631	-3.90046	NaN	-11.9119	NaN	-2.79794	-11.5	NaN	NaN	1.49217	NaN	-0.705924	NaN	NaN	NaN	NaN	-8.62226	NaN	NaN	NaN	NaN	9.79037	17.4102	2.60533	-4.49162	10.8902
	2.61967	-0.0601611	NaN	NaN	NaN	NaN	NaN	NaN	NaN	8.57717	-8.75737	NaN	NaN	NaN	NaN	4.98587	NaN	NaN	NaN	NaN	NaN	NaN	NaN	-8.00104	-2.34822	NaN	-11.9434	NaN	-1.16693	-11.0935	NaN	NaN	2.37959	NaN	0.507472	NaN	NaN	NaN	NaN	-8.22439	NaN	NaN	NaN	NaN	10.9032	17.0988	4.72187	-5.05386	9.4206
	2.36587	-3.42044	NaN	NaN	NaN	NaN	NaN	NaN	NaN	7.51669	14.4644	NaN	NaN	NaN	NaN	1.86343	NaN	NaN	NaN	NaN	NaN	NaN	NaN	-8.44245	0.197611	NaN	-11.9837	NaN	-2.01875	-12.5237	NaN	NaN	2.46878	NaN	-0.771195	NaN	NaN	NaN	NaN	-8.15173	NaN	NaN	NaN	NaN	11.8506	14.2032	6.28899	-4.50186	9.02126
	4.28208	-2.45419	NaN	NaN	NaN	NaN	NaN	NaN	NaN	6.8481	10.3113	NaN	NaN	NaN	NaN	1.86907	NaN	NaN	NaN	NaN	NaN	NaN	NaN	-8.48963	1.06881	NaN	-11.3433	NaN	-0.641041	-12.3258	NaN	NaN	3.08506	NaN	-0.420199	NaN	NaN	NaN	NaN	-7.95544	NaN	NaN	NaN	NaN	12.5036	13.5696	6.66187	-5.70941	9.26016
	2.08345	-0.111521	NaN	NaN	NaN	NaN	NaN	NaN	NaN	3.83901	10.6006	NaN	NaN	NaN	NaN	-1.78937	NaN	NaN	NaN	NaN	NaN	NaN	NaN	-12.1779	1.29626	NaN	-11.1984	NaN	-1.58047	-13.7993	NaN	NaN	1.50261	NaN	-4.65608	NaN	NaN	NaN	NaN	-8.03064	NaN	NaN	NaN	NaN	10.8121	9.09866	4.08755	-6.21434	7.95209
	2.27432	3.81428	NaN	NaN	NaN	NaN	NaN	NaN	NaN	3.44869	-9.12374	NaN	NaN	NaN	NaN	2.22942	NaN	NaN	NaN	NaN	NaN	NaN	NaN	-9.12456	1.79058	NaN	-8.20497	NaN	-1.53957	-11.6221	NaN	NaN	1.54704	NaN	-4.4411	NaN	NaN	NaN	NaN	-8.11881	NaN	NaN	NaN	NaN	11.7037	8.52775	5.57069	-5.50139	6.99501
	-1.05593	2.86596	NaN	NaN	NaN	NaN	NaN	NaN	NaN	1.40973	-12.5591	NaN	NaN	NaN	NaN	3.42465	NaN	NaN	NaN	NaN	NaN	NaN	NaN	-10.2569	5.75041	NaN	-8.21918	NaN	-1.87278	-11.135	NaN	NaN	-1.6564	NaN	-8.1889	NaN	NaN	NaN	NaN	-8.43142	NaN	NaN	NaN	NaN	9.29649	6.24749	3.1693	-6.14383	6.55291
	-1.67218	5.89012	NaN	NaN	NaN	NaN	NaN	NaN	NaN	0.7343	-9.45699	NaN	NaN	NaN	NaN	-2.45137	NaN	NaN	NaN	NaN	NaN	NaN	NaN	-10.396	7.43007	NaN	-11.6635	NaN	-0.511078	-9.65734	NaN	NaN	-1.3224	NaN	-9.0238	NaN	NaN	NaN	NaN	-8.61318	NaN	NaN	NaN	NaN	7.96425	6.38111	1.8193	-4.88625	8.03482
	-5.50778	1.81793	NaN	NaN	NaN	NaN	NaN	NaN	NaN	1.21178	10.456	NaN	NaN	NaN	NaN	-4.36018	NaN	NaN	NaN	NaN	NaN	NaN	NaN	-11.3659	1.18253	NaN	-2.90962	NaN	-0.590002	-10.3322	NaN	NaN	-1.95765	NaN	-2.53814	NaN	NaN	NaN	NaN	-9.15751	NaN	NaN	NaN	NaN	5.4057	4.02668	0.882769	-6.50782	8.89771
	-6.62693	2.24437	NaN	NaN	NaN	NaN	NaN	NaN	NaN	1.54678	0.738455	NaN	NaN	NaN	NaN	-1.49177	NaN	NaN	NaN	NaN	NaN	NaN	NaN	-10.4224	-9.41707	NaN	-2.10292	NaN	0.3012	-7.78064	NaN	NaN	-1.87729	NaN	8.51541	NaN	NaN	NaN	NaN	-8.39333	NaN	NaN	NaN	NaN	4.82613	3.89828	0.685491	-6.72528	8.81273
	-9.03481	0.0151907	NaN	NaN	NaN	NaN	NaN	NaN	NaN	1.202	-10.8414	NaN	NaN	NaN	NaN	-3.68751	NaN	NaN	NaN	NaN	NaN	NaN	NaN	-11.2915	-11.098	NaN	-2.13868	NaN	1.68427	-11.3786	NaN	NaN	-2.72655	NaN	6.50457	NaN	NaN	NaN	NaN	-9.47067	NaN	NaN	NaN	NaN	3.2372	2.54535	-0.80644	-5.14056	9.85097
	-9.10627	2.01003	NaN	NaN	NaN	NaN	NaN	NaN	NaN	1.04634	8.73107	NaN	NaN	NaN	NaN	-4.35975	NaN	NaN	NaN	NaN	NaN	NaN	NaN	-8.96827	-10.681	NaN	-1.85268	NaN	3.56973	-10.3962	NaN	NaN	-1.93179	NaN	5.81083	NaN	NaN	NaN	NaN	-9.59827	NaN	NaN	NaN	NaN	4.80031	3.09388	-0.240533	-3.4325	9.19195
	-9.95327	0.944653	NaN	NaN	NaN	NaN	NaN	NaN	NaN	0.389395	8.29388	NaN	NaN	NaN	NaN	-6.76623	NaN	NaN	NaN	NaN	NaN	NaN	NaN	-9.85133	4.3063	NaN	-2.08721	NaN	2.62729	-8.57079	NaN	NaN	-0.862934	NaN	4.73856	NaN	NaN	NaN	NaN	-9.70809	NaN	NaN	NaN	NaN	3.37416	3.06995	-1.92884	-3.3388	9.67876
	-10.0224	0.0571073	NaN	NaN	NaN	NaN	NaN	NaN	NaN	0.331362	5.59722	NaN	NaN	NaN	NaN	-5.64709	NaN	NaN	NaN	NaN	NaN	NaN	NaN	-8.88334	-4.11727	NaN	1.61885	NaN	2.80752	-8.72568	NaN	NaN	0.162457	NaN	4.97785	NaN	NaN	NaN	NaN	-9.59652	NaN	NaN	NaN	NaN	4.29261	3.23481	-1.38074	-2.05537	10.0899
	-9.84288	-3.63102	NaN	NaN	NaN	NaN	NaN	NaN	NaN	-0.451375	-5.05149	NaN	NaN	NaN	NaN	-6.83088	NaN	NaN	NaN	NaN	NaN	NaN	NaN	-8.10715	-10.2575	NaN	2.69183	NaN	1.44754	-9.65943	NaN	NaN	0.633019	NaN	4.45853	NaN	NaN	NaN	NaN	-10.1298	NaN	NaN	NaN	NaN	0.417661	3.53575	-2.94953	-1.98316	10.3735
	-8.27236	-1.5151	NaN	NaN	NaN	NaN	NaN	NaN	NaN	-0.624232	-1.05519	NaN	NaN	NaN	NaN	-3.12789	NaN	NaN	NaN	NaN	NaN	NaN	NaN	-4.30297	-10.8895	NaN	7.14728	NaN	1.29419	-9.97856	NaN	NaN	2.54491	NaN	5.44329	NaN	NaN	NaN	NaN	-9.44125	NaN	NaN	NaN	NaN	0.186677	5.30563	-2.96836	-0.869555	9.89202
	-7.78548	-3.17186	NaN	NaN	NaN	NaN	NaN	NaN	NaN	-0.588887	-9.5467	NaN	NaN	NaN	NaN	-5.96303	NaN	NaN	NaN	NaN	NaN	NaN	NaN	-1.54089	-12.0446	NaN	7.47693	NaN	-0.317806	-11.4018	NaN	NaN	2.08222	NaN	4.49639	NaN	NaN	NaN	NaN	-9.41983	NaN	NaN	NaN	NaN	-1.34305	5.5024	-4.89143	-1.15058	8.98125
	-6.70907	-4.01769	NaN	NaN	NaN	NaN	NaN	NaN	NaN	0.24173	-9.17048	NaN	NaN	NaN	NaN	-5.12948	NaN	NaN	NaN	NaN	NaN	NaN	NaN	1.18995	-11.8662	NaN	-0.23418	NaN	1.68306	-12.1008	NaN	NaN	2.87717	NaN	6.36065	NaN	NaN	NaN	NaN	-9.40676	NaN	NaN	NaN	NaN	-1.03024	7.94605	-4.91584	-1.28486	9.46429
	-6.90812	-3.983	NaN	NaN	NaN	NaN	NaN	NaN	NaN	0.743578	-8.51322	NaN	NaN	NaN	NaN	-5.22398	NaN	NaN	NaN	NaN	NaN	NaN	NaN	2.5906	-14.1881	NaN	12.2866	NaN	1.40142	-13.5096	NaN	NaN	2.1344	NaN	4.02886	NaN	NaN	NaN	NaN	-9.40628	NaN	NaN	NaN	NaN	-2.11147	5.18091	-6.33137	-2.26211	8.84419
	-6.05497	-1.85567	NaN	NaN	NaN	NaN	NaN	NaN	NaN	1.77526	-7.15125	NaN	NaN	NaN	NaN	-4.05544	NaN	NaN	NaN	NaN	NaN	NaN	NaN	6.12131	-10.5735	NaN	12.8968	NaN	3.75338	-12.5476	NaN	NaN	2.26928	NaN	3.48911	NaN	NaN	NaN	NaN	-8.73219	NaN	NaN	NaN	NaN	-1.61546	4.87476	-5.67079	-2.64064	10.7226
	-5.1416	-2.97245	NaN	NaN	NaN	NaN	NaN	NaN	NaN	2.84987	-7.12763	NaN	NaN	NaN	NaN	-6.19826	NaN	NaN	NaN	NaN	NaN	NaN	NaN	4.61116	7.11427	NaN	12.8152	NaN	1.42007	-15.5795	NaN	NaN	1.75848	NaN	3.62593	NaN	NaN	NaN	NaN	-9.94346	NaN	NaN	NaN	NaN	-3.72929	1.71221	-5.60153	-4.99308	8.65042
	-4.59017	0.48718	NaN	NaN	NaN	NaN	NaN	NaN	NaN	4.20918	-7.15199	NaN	NaN	NaN	NaN	-6.59614	NaN	NaN	NaN	NaN	NaN	NaN	NaN	6.22022	7.61445	NaN	14.5403	NaN	1.28047	-15.6708	NaN	NaN	2.15892	NaN	3.55651	NaN	NaN	NaN	NaN	-9.88257	NaN	NaN	NaN	NaN	-0.81167	0.717934	-3.19831	-5.71636	8.40671
	-3.4212	1.35473	NaN	NaN	NaN	NaN	NaN	NaN	NaN	5.00361	-6.71175	NaN	NaN	NaN	NaN	-6.80042	NaN	NaN	NaN	NaN	NaN	NaN	NaN	2.42357	4.63525	NaN	17.4697	NaN	0.851091	-17.9794	NaN	NaN	3.25623	NaN	2.70658	NaN	NaN	NaN	NaN	-10.6087	NaN	NaN	NaN	NaN	0.0678399	-1.5986	-1.69145	-3.89527	7.65583
	-1.86891	1.54174	NaN	NaN	NaN	NaN	NaN	NaN	NaN	5.90635	-7.83224	NaN	NaN	NaN	NaN	-7.78548	NaN	NaN	NaN	NaN	NaN	NaN	NaN	0.864826	1.15451	NaN	19.8156	NaN	2.5774	-13.0286	NaN	NaN	4.1602	NaN	2.80663	NaN	NaN	NaN	NaN	-13.577	NaN	NaN	NaN	NaN	1.06378	5.02784	-0.193036	-5.81825	4.87601
	-2.9599	-1.06315	NaN	NaN	NaN	NaN	NaN	NaN	NaN	6.2879	15.6615	NaN	NaN	NaN	NaN	-7.88504	NaN	NaN	NaN	NaN	NaN	NaN	NaN	2.33646	0.236948	NaN	20.281	NaN	13.234	4.99813	NaN	NaN	3.64446	NaN	0.878673	NaN	NaN	NaN	NaN	-13.251	NaN	NaN	NaN	NaN	0.411595	-10.275	-1.74924	-4.80365	3.33981
	-2.38445	2.92166	NaN	NaN	NaN	NaN	NaN	NaN	NaN	9.26209	17.355	NaN	NaN	NaN	NaN	-4.32599	NaN	NaN	NaN	NaN	NaN	NaN	NaN	4.43044	1.62136	NaN	20.2312	NaN	1.35027	4.03616	NaN	NaN	3.81414	NaN	0.522197	NaN	NaN	NaN	NaN	-10.8622	NaN	NaN	NaN	NaN	1.35478	-9.69422	-0.0708311	-4.40729	2.4244
	-5.04707	1.66651	NaN	NaN	NaN	NaN	NaN	NaN	NaN	8.79887	17.1126	NaN	NaN	NaN	NaN	-6.7902	NaN	NaN	NaN	NaN	NaN	NaN	NaN	3.97273	0.825281	NaN	17.3611	NaN	1.06578	4.90164	NaN	NaN	3.19658	NaN	0.90503	NaN	NaN	NaN	NaN	-9.32942	NaN	NaN	NaN	NaN	0.755211	-11.0067	-0.831366	-5.19004	1.2457
	-5.53666	2.45929	NaN	NaN	NaN	NaN	NaN	NaN	NaN	10.6477	17.1722	NaN	NaN	NaN	NaN	-2.50555	NaN	NaN	NaN	NaN	NaN	NaN	NaN	4.97685	2.44265	NaN	16.543	NaN	-0.921972	5.01623	NaN	NaN	3.20927	NaN	-1.6102	NaN	NaN	NaN	NaN	-5.56473	NaN	NaN	NaN	NaN	0.502145	-10.8244	1.20441	-5.06956	1.30709
	-5.94978	1.74172	NaN	NaN	NaN	NaN	NaN	NaN	NaN	11.3302	16.6575	NaN	NaN	NaN	NaN	-5.92709	NaN	NaN	NaN	NaN	NaN	NaN	NaN	4.56533	1.81306	NaN	11.7457	NaN	-0.125101	5.58595	NaN	NaN	2.71557	NaN	-3.74071	NaN	NaN	NaN	NaN	-4.22536	NaN	NaN	NaN	NaN	-0.0248806	-11.6721	-0.0596003	-6.42821	0.293551
	-5.3298	3.63606	NaN	NaN	NaN	NaN	NaN	NaN	NaN	11.7099	16.5082	NaN	NaN	NaN	NaN	-4.77651	NaN	NaN	NaN	NaN	NaN	NaN	NaN	7.0884	3.68299	NaN	11.3	NaN	2.4115	5.45311	NaN	NaN	3.15785	NaN	-3.92336	NaN	NaN	NaN	NaN	-1.01128	NaN	NaN	NaN	NaN	3.05639	-11.2591	-0.475397	-6.15672	1.25741
	-5.22427	1.36933	NaN	NaN	NaN	NaN	NaN	NaN	NaN	8.28696	17.2338	NaN	NaN	NaN	NaN	-5.42581	NaN	NaN	NaN	NaN	NaN	NaN	NaN	7.01842	1.84927	NaN	7.22218	NaN	-0.0113507	5.84776	NaN	NaN	2.30574	NaN	-4.20361	NaN	NaN	NaN	NaN	-0.0979512	NaN	NaN	NaN	NaN	5.01637	-12.9049	-1.28917	-6.77131	0.662491
	-4.72993	3.87863	NaN	NaN	NaN	NaN	NaN	NaN	NaN	6.99921	15.3945	NaN	NaN	NaN	NaN	-5.13539	NaN	NaN	NaN	NaN	NaN	NaN	NaN	6.81099	1.63397	NaN	9.11131	NaN	0.629438	5.75193	NaN	NaN	2.5354	NaN	-4.43099	NaN	NaN	NaN	NaN	3.83005	NaN	NaN	NaN	NaN	7.55737	-12.9731	-1.56477	-6.08043	1.35729
	-4.99641	0.40804	NaN	NaN	NaN	NaN	NaN	NaN	NaN	3.3275	16.9148	NaN	NaN	NaN	NaN	-6.23572	NaN	NaN	NaN	NaN	NaN	NaN	NaN	5.46504	2.12786	NaN	8.76843	NaN	-0.868692	6.02345	NaN	NaN	0.808268	NaN	-8.30103	NaN	NaN	NaN	NaN	5.04142	NaN	NaN	NaN	NaN	7.8437	-15.2469	-3.24862	-7.43886	0.588205
	-3.27067	0.445696	NaN	NaN	NaN	NaN	NaN	NaN	NaN	3.38817	-7.00535	NaN	NaN	NaN	NaN	-2.03804	NaN	NaN	NaN	NaN	NaN	NaN	NaN	5.29335	2.74803	NaN	12.0825	NaN	-0.677115	6.39503	NaN	NaN	0.785549	NaN	-8.17934	NaN	NaN	NaN	NaN	-2.61832	NaN	NaN	NaN	NaN	9.01209	-15.5477	-1.83704	-4.57334	0.570986
	-3.68058	-1.33946	NaN	NaN	NaN	NaN	NaN	NaN	NaN	0.94558	16.871	NaN	NaN	NaN	NaN	-1.93224	NaN	NaN	NaN	NaN	NaN	NaN	NaN	3.00805	2.76613	NaN	12.7634	NaN	-1.97156	5.24267	NaN	NaN	0.256314	NaN	-7.30788	NaN	NaN	NaN	NaN	11.9842	NaN	NaN	NaN	NaN	8.53147	-15.2632	-2.50444	-5.49529	0.439981
	-2.89071	-0.141241	NaN	NaN	NaN	NaN	NaN	NaN	NaN	0.988721	16.3142	NaN	NaN	NaN	NaN	2.47443	NaN	NaN	NaN	NaN	NaN	NaN	NaN	3.22903	1.74162	NaN	14.5607	NaN	-0.916944	5.78273	NaN	NaN	0.644103	NaN	-7.95325	NaN	NaN	NaN	NaN	1.86605	NaN	NaN	NaN	NaN	9.09001	-13.1332	-2.4073	-6.15257	0.777934
	-3.55516	-0.696645	NaN	NaN	NaN	NaN	NaN	NaN	NaN	-0.195743	-12.1441	NaN	NaN	NaN	NaN	1.31055	NaN	NaN	NaN	NaN	NaN	NaN	NaN	0.414438	-12.6715	NaN	11.0378	NaN	-2.88524	4.79462	NaN	NaN	-1.21347	NaN	-7.76948	NaN	NaN	NaN	NaN	19.1173	NaN	NaN	NaN	NaN	7.37805	-13.1164	-3.82704	-5.81312	1.32613
	-2.90931	-1.19698	NaN	NaN	NaN	NaN	NaN	NaN	NaN	0.067868	-10.8205	NaN	NaN	NaN	NaN	4.69353	NaN	NaN	NaN	NaN	NaN	NaN	NaN	1.51686	2.43794	NaN	13.2969	NaN	-1.09351	3.46306	NaN	NaN	-1.86098	NaN	-7.54748	NaN	NaN	NaN	NaN	22.5397	NaN	NaN	NaN	NaN	11.2398	-8.86158	-3.76707	-5.4852	0.761928
	-1.42364	-1.18828	NaN	NaN	NaN	NaN	NaN	NaN	NaN	-2.69175	-12.4823	NaN	NaN	NaN	NaN	3.01629	NaN	NaN	NaN	NaN	NaN	NaN	NaN	-2.19535	6.49033	NaN	12.3303	NaN	-2.47622	1.64027	NaN	NaN	-3.23401	NaN	-7.5148	NaN	NaN	NaN	NaN	22.3916	NaN	NaN	NaN	NaN	7.62681	-8.00373	-4.78477	-4.99862	1.05741
	-0.367891	-0.790874	NaN	NaN	NaN	NaN	NaN	NaN	NaN	-2.35472	-12.1224	NaN	NaN	NaN	NaN	6.8196	NaN	NaN	NaN	NaN	NaN	NaN	NaN	-1.00295	6.88649	NaN	13.0913	NaN	-2.19486	1.24178	NaN	NaN	-3.04589	NaN	-6.8283	NaN	NaN	NaN	NaN	25.0187	NaN	NaN	NaN	NaN	10.3415	-4.58221	-5.0495	-4.27215	-1.38367
	0.0171863	-2.38852	NaN	NaN	NaN	NaN	NaN	NaN	NaN	-5.40444	-13.708	NaN	NaN	NaN	NaN	6.85947	NaN	NaN	NaN	NaN	NaN	NaN	NaN	-3.77337	5.6938	NaN	9.75139	NaN	-4.41543	0.52435	NaN	NaN	-4.85193	NaN	-6.61054	NaN	NaN	NaN	NaN	23.6719	NaN	NaN	NaN	NaN	6.75837	-5.57558	-6.81801	-5.67282	-1.35425
	2.07159	-6.13464	NaN	NaN	NaN	NaN	NaN	NaN	NaN	-6.0215	-12.8792	NaN	NaN	NaN	NaN	7.85948	NaN	NaN	NaN	NaN	NaN	NaN	NaN	-4.64352	8.65157	NaN	10.7702	NaN	-4.51352	0.534413	NaN	NaN	-4.51534	NaN	-6.94627	NaN	NaN	NaN	NaN	23.1092	NaN	NaN	NaN	NaN	8.44478	-4.85066	-4.37563	-4.32122	-1.42974
	2.29486	-2.34155	NaN	NaN	NaN	NaN	NaN	NaN	NaN	-9.43251	-11.6514	NaN	NaN	NaN	NaN	7.34632	NaN	NaN	NaN	NaN	NaN	NaN	NaN	-6.62616	9.04865	NaN	11.0491	NaN	-5.98849	-0.0309926	NaN	NaN	-5.10178	NaN	-8.04582	NaN	NaN	NaN	NaN	21.6392	NaN	NaN	NaN	NaN	5.01455	-4.94082	-6.49637	-7.79381	-2.46116
	3.16905	-1.79305	NaN	NaN	NaN	NaN	NaN	NaN	NaN	-10.2936	-12.3024	NaN	NaN	NaN	NaN	8.49251	NaN	NaN	NaN	NaN	NaN	NaN	NaN	-6.63769	6.68841	NaN	13.4814	NaN	-5.84828	0.718644	NaN	NaN	-4.38808	NaN	-8.04131	NaN	NaN	NaN	NaN	21.157	NaN	NaN	NaN	NaN	4.27626	-3.66107	-5.8554	-7.06979	-2.5313
	2.10526	-3.23593	NaN	NaN	NaN	NaN	NaN	NaN	NaN	-11.5282	-12.9152	NaN	NaN	NaN	NaN	5.369	NaN	NaN	NaN	NaN	NaN	NaN	NaN	-7.66246	-8.2708	NaN	12.2122	NaN	-6.68123	0.436739	NaN	NaN	-5.48892	NaN	-7.60134	NaN	NaN	NaN	NaN	18.6079	NaN	NaN	NaN	NaN	1.41867	-3.92197	-6.41717	-8.8749	-2.45373
	1.64717	-2.33006	NaN	NaN	NaN	NaN	NaN	NaN	NaN	-9.98284	12.4226	NaN	NaN	NaN	NaN	8.13279	NaN	NaN	NaN	NaN	NaN	NaN	NaN	-6.50981	-6.5833	NaN	12.9348	NaN	-5.40407	0.921725	NaN	NaN	-4.76852	NaN	-8.12112	NaN	NaN	NaN	NaN	18.4414	NaN	NaN	NaN	NaN	2.84026	-3.61071	-6.37338	-8.9149	-1.47587
	1.69489	-2.82078	NaN	NaN	NaN	NaN	NaN	NaN	NaN	-9.67597	8.68006	NaN	NaN	NaN	NaN	5.24621	NaN	NaN	NaN	NaN	NaN	NaN	NaN	-6.33711	-8.5456	NaN	11.9724	NaN	-6.18473	0.135292	NaN	NaN	-5.17492	NaN	-7.53329	NaN	NaN	NaN	NaN	17.9641	NaN	NaN	NaN	NaN	-0.580046	-4.17733	-7.91834	-9.63459	-1.00911
	2.15288	-3.22621	NaN	NaN	NaN	NaN	NaN	NaN	NaN	-8.96207	-11.9769	NaN	NaN	NaN	NaN	5.44852	NaN	NaN	NaN	NaN	NaN	NaN	NaN	-2.56812	-7.1159	NaN	12.4942	NaN	-5.1709	1.63413	NaN	NaN	-5.42989	NaN	-7.84738	NaN	NaN	NaN	NaN	18.0843	NaN	NaN	NaN	NaN	-0.290226	-4.15211	-8.09931	-7.89685	2.2775
	1.69445	-6.50281	NaN	NaN	NaN	NaN	NaN	NaN	NaN	-8.97002	-12.6088	NaN	NaN	NaN	NaN	4.18003	NaN	NaN	NaN	NaN	NaN	NaN	NaN	-4.13603	-7.31764	NaN	12.4876	NaN	-5.33326	2.12708	NaN	NaN	-5.29108	NaN	-6.80358	NaN	NaN	NaN	NaN	15.7477	NaN	NaN	NaN	NaN	-0.0204098	-4.89512	-9.29745	-6.99129	0.918839
	5.1775	-2.78299	NaN	NaN	NaN	NaN	NaN	NaN	NaN	-7.79623	-0.246324	NaN	NaN	NaN	NaN	4.54218	NaN	NaN	NaN	NaN	NaN	NaN	NaN	-3.81235	-7.90864	NaN	11.8898	NaN	-4.76706	1.89405	NaN	NaN	-4.85862	NaN	-6.86744	NaN	NaN	NaN	NaN	17.1534	NaN	NaN	NaN	NaN	1.06483	-5.39276	-7.37059	-5.412	2.0642
	5.04801	-2.57542	NaN	NaN	NaN	NaN	NaN	NaN	NaN	-7.89961	10.5513	NaN	NaN	NaN	NaN	2.66305	NaN	NaN	NaN	NaN	NaN	NaN	NaN	-4.03184	-10.7802	NaN	10.6107	NaN	-5.4936	1.95987	NaN	NaN	-6.68227	NaN	-5.18749	NaN	NaN	NaN	NaN	16.0023	NaN	NaN	NaN	NaN	-0.580131	-5.95758	-9.53675	-5.55146	0.000481701
	7.86316	-4.99875	NaN	NaN	NaN	NaN	NaN	NaN	NaN	-7.83136	-1.64841	NaN	NaN	NaN	NaN	3.79067	NaN	NaN	NaN	NaN	NaN	NaN	NaN	-3.31969	-8.56211	NaN	10.4063	NaN	-5.39643	2.02024	NaN	NaN	-6.25445	NaN	-4.44548	NaN	NaN	NaN	NaN	15.9245	NaN	NaN	NaN	NaN	0.693478	-6.74711	-6.69841	-2.8056	-0.354946
	7.33683	-6.55461	NaN	NaN	NaN	NaN	NaN	NaN	NaN	-7.28905	-12.2928	NaN	NaN	NaN	NaN	4.94175	NaN	NaN	NaN	NaN	NaN	NaN	NaN	-3.21905	-9.09578	NaN	10.7141	NaN	-4.63307	1.43302	NaN	NaN	-7.21506	NaN	-5.23047	NaN	NaN	NaN	NaN	15.9677	NaN	NaN	NaN	NaN	0.255459	-6.51394	-7.13497	-2.67449	-1.32806
	6.0111	-9.41846	NaN	NaN	NaN	NaN	NaN	NaN	NaN	-6.88839	-6.42755	NaN	NaN	NaN	NaN	6.48608	NaN	NaN	NaN	NaN	NaN	NaN	NaN	-5.24748	-7.61314	NaN	12.2398	NaN	-3.38968	0.56897	NaN	NaN	-7.81988	NaN	-2.56525	NaN	NaN	NaN	NaN	16.1969	NaN	NaN	NaN	NaN	0.522209	-6.18478	-7.03836	-0.936859	-2.80472
	5.86356	-10.1701	NaN	NaN	NaN	NaN	NaN	NaN	NaN	-6.86445	5.15249	NaN	NaN	NaN	NaN	5.44601	NaN	NaN	NaN	NaN	NaN	NaN	NaN	-6.70727	6.48494	NaN	11.2678	NaN	-5.19893	-0.136953	NaN	NaN	-8.66015	NaN	-2.33793	NaN	NaN	NaN	NaN	14.9456	NaN	NaN	NaN	NaN	-8.95595	-6.5226	-8.218	-2.68662	-3.91203
	6.56728	-7.93601	NaN	NaN	NaN	NaN	NaN	NaN	NaN	-4.19844	15.2016	NaN	NaN	NaN	NaN	6.07476	NaN	NaN	NaN	NaN	NaN	NaN	NaN	-6.05273	6.38898	NaN	10.9159	NaN	-2.25091	0.554907	NaN	NaN	-7.17667	NaN	-1.12222	NaN	NaN	NaN	NaN	16.4225	NaN	NaN	NaN	NaN	-7.64611	-4.38064	-8.15418	-1.71223	-3.48982
	6.15257	-5.91101	NaN	NaN	NaN	NaN	NaN	NaN	NaN	-3.46279	15.5097	NaN	NaN	NaN	NaN	3.7081	NaN	NaN	NaN	NaN	NaN	NaN	NaN	-7.04942	4.47057	NaN	9.65789	NaN	-4.33102	1.47139	NaN	NaN	-7.52194	NaN	-1.96324	NaN	NaN	NaN	NaN	16.1758	NaN	NaN	NaN	NaN	-8.32227	-3.62758	-9.10665	-0.667662	-4.35365
	8.52064	-6.17494	NaN	NaN	NaN	NaN	NaN	NaN	NaN	-0.213372	-9.36019	NaN	NaN	NaN	NaN	4.18683	NaN	NaN	NaN	NaN	NaN	NaN	NaN	-6.34859	4.27068	NaN	8.65772	NaN	-1.33474	2.60888	NaN	NaN	-7.64723	NaN	-1.38054	NaN	NaN	NaN	NaN	17.1783	NaN	NaN	NaN	NaN	-5.53484	-1.89889	-7.85821	-0.11539	-3.65182
	9.14657	-7.13231	NaN	NaN	NaN	NaN	NaN	NaN	NaN	-0.302994	-8.36394	NaN	NaN	NaN	NaN	0.136344	NaN	NaN	NaN	NaN	NaN	NaN	NaN	-7.84133	4.32158	NaN	8.4818	NaN	-2.5294	2.27589	NaN	NaN	-7.26439	NaN	-0.813347	NaN	NaN	NaN	NaN	15.5365	NaN	NaN	NaN	NaN	-6.07662	-1.97329	-6.34586	-0.496543	-3.36681
	10.5848	-8.51604	NaN	NaN	NaN	NaN	NaN	NaN	NaN	1.29848	-6.84851	NaN	NaN	NaN	NaN	0.0289028	NaN	NaN	NaN	NaN	NaN	NaN	NaN	-8.00793	3.21681	NaN	10.0084	NaN	-1.82424	4.11791	NaN	NaN	-5.90539	NaN	-0.294795	NaN	NaN	NaN	NaN	15.4988	NaN	NaN	NaN	NaN	-2.73815	-0.295586	-4.77838	-0.868651	-3.84085
	10.8915	-6.93018	NaN	NaN	NaN	NaN	NaN	NaN	NaN	1.22227	-6.55896	NaN	NaN	NaN	NaN	-2.64596	NaN	NaN	NaN	NaN	NaN	NaN	NaN	-8.05107	2.60352	NaN	8.72309	NaN	-3.11311	4.63133	NaN	NaN	-4.33785	NaN	0.107893	NaN	NaN	NaN	NaN	13.926	NaN	NaN	NaN	NaN	-3.05846	-0.969399	-5.65591	0.289163	-3.05665
	14.4847	-6.44867	NaN	NaN	NaN	NaN	NaN	NaN	NaN	2.85418	-4.13514	NaN	NaN	NaN	NaN	-2.15084	NaN	NaN	NaN	NaN	NaN	NaN	NaN	-8.03121	2.00564	NaN	11.0365	NaN	-3.54676	5.38802	NaN	NaN	-2.27827	NaN	-1.22367	NaN	NaN	NaN	NaN	14.8706	NaN	NaN	NaN	NaN	-1.51967	-0.286934	-4.10309	2.24948	-2.39033
	14.4465	-8.3916	NaN	NaN	NaN	NaN	NaN	NaN	NaN	2.34709	-5.2353	NaN	NaN	NaN	NaN	-3.76317	NaN	NaN	NaN	NaN	NaN	NaN	NaN	-8.66211	0.933311	NaN	9.17609	NaN	-4.96881	4.32713	NaN	NaN	-2.01421	NaN	-2.04459	NaN	NaN	NaN	NaN	14.799	NaN	NaN	NaN	NaN	-1.84607	0.0111377	-5.78177	2.61978	-2.13513
	14.5427	-8.70668	NaN	NaN	NaN	NaN	NaN	NaN	NaN	3.74471	-4.6707	NaN	NaN	NaN	NaN	-2.80551	NaN	NaN	NaN	NaN	NaN	NaN	NaN	-7.77821	0.562428	NaN	10.315	NaN	-3.99784	6.10598	NaN	NaN	1.63818	NaN	-0.657818	NaN	NaN	NaN	NaN	14.8196	NaN	NaN	NaN	NaN	0.027745	1.4081	-5.71554	4.16427	-2.76809
	14.2216	-8.8919	NaN	NaN	NaN	NaN	NaN	NaN	NaN	2.05043	-5.57214	NaN	NaN	NaN	NaN	-5.0618	NaN	NaN	NaN	NaN	NaN	NaN	NaN	-6.9551	-0.11603	NaN	7.61769	NaN	-5.46505	6.30958	NaN	NaN	0.165622	NaN	-2.69037	NaN	NaN	NaN	NaN	14.2798	NaN	NaN	NaN	NaN	-1.53601	1.25624	-6.73035	3.66102	-1.80686
	15.8224	-6.47154	NaN	NaN	NaN	NaN	NaN	NaN	NaN	2.30814	-5.41405	NaN	NaN	NaN	NaN	-2.90162	NaN	NaN	NaN	NaN	NaN	NaN	NaN	-5.04195	2.30458	NaN	6.9927	NaN	-3.27128	5.00967	NaN	NaN	2.26675	NaN	-2.15117	NaN	NaN	NaN	NaN	14.7535	NaN	NaN	NaN	NaN	0.873175	2.11408	-6.5786	4.40313	-2.60344
	15.3298	-7.96609	NaN	NaN	NaN	NaN	NaN	NaN	NaN	0.42907	-6.12335	NaN	NaN	NaN	NaN	-3.67467	NaN	NaN	NaN	NaN	NaN	NaN	NaN	-5.83418	1.46948	NaN	5.4923	NaN	-4.61825	4.85758	NaN	NaN	2.22032	NaN	-2.5289	NaN	NaN	NaN	NaN	11.8238	NaN	NaN	NaN	NaN	0.499519	1.45638	-7.48762	5.6806	-1.90887
	16.5779	-8.31432	NaN	NaN	NaN	NaN	NaN	NaN	NaN	0.998703	-6.30761	NaN	NaN	NaN	NaN	-3.62403	NaN	NaN	NaN	NaN	NaN	NaN	NaN	-4.83053	2.0121	NaN	4.30529	NaN	-4.12599	5.84609	NaN	NaN	3.2346	NaN	-0.787738	NaN	NaN	NaN	NaN	11.617	NaN	NaN	NaN	NaN	4.60867	2.88421	-7.29163	4.11493	-2.3944
	15.1567	-6.99884	NaN	NaN	NaN	NaN	NaN	NaN	NaN	-0.82642	-5.12142	NaN	NaN	NaN	NaN	-4.53375	NaN	NaN	NaN	NaN	NaN	NaN	NaN	-4.48785	2.53333	NaN	1.80581	NaN	-4.44055	5.90424	NaN	NaN	3.94897	NaN	2.71346	NaN	NaN	NaN	NaN	9.46837	NaN	NaN	NaN	NaN	5.13203	2.30322	-7.82279	4.51131	-2.39964
	16.3898	-3.11563	NaN	NaN	NaN	NaN	NaN	NaN	NaN	-1.50177	-5.4931	NaN	NaN	NaN	NaN	-2.02851	NaN	NaN	NaN	NaN	NaN	NaN	NaN	-4.60727	1.09428	NaN	2.65981	NaN	-5.13794	7.71459	NaN	NaN	5.85628	NaN	6.79893	NaN	NaN	NaN	NaN	9.01857	NaN	NaN	NaN	NaN	6.82508	1.78805	-6.30348	3.30121	-2.48177
	14.5041	-6.22328	NaN	NaN	NaN	NaN	NaN	NaN	NaN	-1.90317	-7.69192	NaN	NaN	NaN	NaN	-1.91047	NaN	NaN	NaN	NaN	NaN	NaN	NaN	-4.38166	1.88703	NaN	1.51251	NaN	-7.77508	6.0093	NaN	NaN	5.26847	NaN	-2.34003	NaN	NaN	NaN	NaN	7.804	NaN	NaN	NaN	NaN	3.65809	1.91425	-6.58671	0.7566	-2.90804
	14.8291	-3.77153	NaN	NaN	NaN	NaN	NaN	NaN	NaN	-2.16715	-7.42955	NaN	NaN	NaN	NaN	2.33702	NaN	NaN	NaN	NaN	NaN	NaN	NaN	-4.30693	1.74079	NaN	2.19129	NaN	-4.37212	5.75191	NaN	NaN	7.35625	NaN	-9.05056	NaN	NaN	NaN	NaN	7.9493	NaN	NaN	NaN	NaN	5.63954	2.24113	-7.07101	-0.88812	-4.30978
	12.6369	-5.35803	NaN	NaN	NaN	NaN	NaN	NaN	NaN	-2.57272	-7.03852	NaN	NaN	NaN	NaN	1.42158	NaN	NaN	NaN	NaN	NaN	NaN	NaN	-2.4676	-4.1656	NaN	-1.8305	NaN	-2.94212	5.31503	NaN	NaN	4.09447	NaN	-7.52986	NaN	NaN	NaN	NaN	6.70969	NaN	NaN	NaN	NaN	4.32274	1.1119	-7.11746	-2.11879	-4.44138
	11.6099	-3.45589	NaN	NaN	NaN	NaN	NaN	NaN	NaN	-2.15228	-6.72861	NaN	NaN	NaN	NaN	2.60897	NaN	NaN	NaN	NaN	NaN	NaN	NaN	-2.11915	1.8138	NaN	0.210276	NaN	-0.883923	4.59988	NaN	NaN	4.57592	NaN	4.7562	NaN	NaN	NaN	NaN	5.99377	NaN	NaN	NaN	NaN	3.98935	0.973834	-7.46994	-3.5615	-4.74348
	8.5908	-3.67389	NaN	NaN	NaN	NaN	NaN	NaN	NaN	-2.03457	-6.59251	NaN	NaN	NaN	NaN	1.01607	NaN	NaN	NaN	NaN	NaN	NaN	NaN	-1.04803	-0.499446	NaN	-3.9462	NaN	-2.70832	3.54487	NaN	NaN	2.71812	NaN	-3.76983	NaN	NaN	NaN	NaN	4.83815	NaN	NaN	NaN	NaN	2.57208	-1.36736	-8.09415	-3.55076	-6.26104
	8.45412	-1.33521	NaN	NaN	NaN	NaN	NaN	NaN	NaN	-1.04998	-7.56074	NaN	NaN	NaN	NaN	1.13236	NaN	NaN	NaN	NaN	NaN	NaN	NaN	-0.628706	1.81391	NaN	-2.924	NaN	-1.58867	4.01335	NaN	NaN	1.59957	NaN	-5.6953	NaN	NaN	NaN	NaN	5.38815	NaN	NaN	NaN	NaN	2.81519	-1.8041	-6.81717	-3.13749	-7.20447
	5.30827	-1.65705	NaN	NaN	NaN	NaN	NaN	NaN	NaN	0.395666	-7.23403	NaN	NaN	NaN	NaN	0.267824	NaN	NaN	NaN	NaN	NaN	NaN	NaN	-0.297004	5.88391	NaN	-5.10706	NaN	-4.862	3.45325	NaN	NaN	-2.25628	NaN	2.74723	NaN	NaN	NaN	NaN	4.5046	NaN	NaN	NaN	NaN	0.104134	-3.3534	-6.92334	-4.034	-6.65288
	5.22875	1.44424	NaN	NaN	NaN	NaN	NaN	NaN	NaN	1.80657	-6.88356	NaN	NaN	NaN	NaN	1.27495	NaN	NaN	NaN	NaN	NaN	NaN	NaN	-0.640459	-1.1759	NaN	-2.88825	NaN	-3.08361	2.55316	NaN	NaN	-2.18163	NaN	-1.38683	NaN	NaN	NaN	NaN	4.37286	NaN	NaN	NaN	NaN	1.11235	-3.32288	-5.57346	-3.74935	-6.52147
	4.81145	1.20026	NaN	NaN	NaN	NaN	NaN	NaN	NaN	0.642026	-6.66056	NaN	NaN	NaN	NaN	0.766753	NaN	NaN	NaN	NaN	NaN	NaN	NaN	-0.340166	14.906	NaN	-4.37294	NaN	-3.15445	0.556342	NaN	NaN	-5.13897	NaN	13.0761	NaN	NaN	NaN	NaN	4.01293	NaN	NaN	NaN	NaN	-0.371976	-5.07547	-5.35018	-2.91437	-7.1452
	5.5518	3.51902	NaN	NaN	NaN	NaN	NaN	NaN	NaN	0.589047	-7.07662	NaN	NaN	NaN	NaN	0.304023	NaN	NaN	NaN	NaN	NaN	NaN	NaN	-0.765606	0.657231	NaN	-0.606274	NaN	-1.8485	-0.341147	NaN	NaN	-5.17682	NaN	-4.73257	NaN	NaN	NaN	NaN	3.54338	NaN	NaN	NaN	NaN	-0.211303	-5.81369	-2.89254	0.155328	-7.43648
	4.31319	3.05506	NaN	NaN	NaN	NaN	NaN	NaN	NaN	-1.53646	-12.7195	NaN	NaN	NaN	NaN	0.235532	NaN	NaN	NaN	NaN	NaN	NaN	NaN	-0.683862	25.0139	NaN	-1.40571	NaN	-4.78167	-0.281972	NaN	NaN	-7.23922	NaN	19.7749	NaN	NaN	NaN	NaN	3.27674	NaN	NaN	NaN	NaN	-1.28886	-4.45098	-3.62124	0.492362	-7.65858
	4.27718	4.84449	NaN	NaN	NaN	NaN	NaN	NaN	NaN	-1.90166	-11.6141	NaN	NaN	NaN	NaN	2.38159	NaN	NaN	NaN	NaN	NaN	NaN	NaN	0.125458	25.2415	NaN	2.95789	NaN	-3.97281	-1.42368	NaN	NaN	-5.71658	NaN	0.680201	NaN	NaN	NaN	NaN	3.46926	NaN	NaN	NaN	NaN	-1.54057	-4.08379	-0.707525	2.34355	-7.43595
	4.07438	5.14723	NaN	NaN	NaN	NaN	NaN	NaN	NaN	-2.85827	-10.3309	NaN	NaN	NaN	NaN	2.32861	NaN	NaN	NaN	NaN	NaN	NaN	NaN	1.89174	24.638	NaN	1.1511	NaN	2.81667	-0.130169	NaN	NaN	-9.10814	NaN	27.8384	NaN	NaN	NaN	NaN	4.10736	NaN	NaN	NaN	NaN	-3.23807	-3.09683	-1.55802	1.86573	-8.02174
	0.466013	2.62419	NaN	NaN	NaN	NaN	NaN	NaN	NaN	-3.71984	-10.4314	NaN	NaN	NaN	NaN	2.56183	NaN	NaN	NaN	NaN	NaN	NaN	NaN	3.20665	23.7528	NaN	3.40276	NaN	5.33119	-1.94915	NaN	NaN	-11.4553	NaN	29.6548	NaN	NaN	NaN	NaN	3.93441	NaN	NaN	NaN	NaN	-0.291639	-2.02761	0.692321	-0.0319864	-7.81442
	-0.487536	0.988092	NaN	NaN	NaN	NaN	NaN	NaN	NaN	-4.32486	-9.89804	NaN	NaN	NaN	NaN	0.233284	NaN	NaN	NaN	NaN	NaN	NaN	NaN	3.03977	12.8356	NaN	1.46337	NaN	3.4798	-0.746707	NaN	NaN	-11.3838	NaN	29.0552	NaN	NaN	NaN	NaN	4.28647	NaN	NaN	NaN	NaN	-9.20563	-4.21806	0.983012	1.87791	-9.45653
	0.382969	1.9146	NaN	NaN	NaN	NaN	NaN	NaN	NaN	-3.77923	11.8452	NaN	NaN	NaN	NaN	1.09619	NaN	NaN	NaN	NaN	NaN	NaN	NaN	4.26089	17.5422	NaN	6.00036	NaN	3.25552	-1.11553	NaN	NaN	-10.9136	NaN	30.0268	NaN	NaN	NaN	NaN	4.59246	NaN	NaN	NaN	NaN	-6.73023	-3.36581	4.08917	3.88278	-8.36404
	0.822509	-0.391631	NaN	NaN	NaN	NaN	NaN	NaN	NaN	-4.70127	-10.9725	NaN	NaN	NaN	NaN	-1.23567	NaN	NaN	NaN	NaN	NaN	NaN	NaN	3.19058	24.9398	NaN	1.93538	NaN	-0.302906	-0.346847	NaN	NaN	-10.1785	NaN	29.5768	NaN	NaN	NaN	NaN	3.37112	NaN	NaN	NaN	NaN	-5.73713	-3.64385	3.40142	4.93532	-7.79895
	3.08826	0.690928	NaN	NaN	NaN	NaN	NaN	NaN	NaN	-4.49901	-12.1348	NaN	NaN	NaN	NaN	-0.736037	NaN	NaN	NaN	NaN	NaN	NaN	NaN	2.83659	14.381	NaN	5.94692	NaN	-0.357693	0.995141	NaN	NaN	-8.45511	NaN	29.4175	NaN	NaN	NaN	NaN	3.07823	NaN	NaN	NaN	NaN	-1.83109	-3.68631	5.47601	6.51279	-7.91943
	3.4571	-2.91168	NaN	NaN	NaN	NaN	NaN	NaN	NaN	-4.68634	-10.1647	NaN	NaN	NaN	NaN	-0.948827	NaN	NaN	NaN	NaN	NaN	NaN	NaN	2.40069	10.3876	NaN	3.88595	NaN	-1.66661	0.579276	NaN	NaN	-7.67955	NaN	24.504	NaN	NaN	NaN	NaN	2.61721	NaN	NaN	NaN	NaN	-0.267611	-3.8258	3.70088	8.10109	-7.0172
	5.31343	-1.20244	NaN	NaN	NaN	NaN	NaN	NaN	NaN	-3.72254	0.973574	NaN	NaN	NaN	NaN	0.355859	NaN	NaN	NaN	NaN	NaN	NaN	NaN	1.95555	13.2692	NaN	8.69172	NaN	-0.808317	2.36582	NaN	NaN	-4.09131	NaN	23.4349	NaN	NaN	NaN	NaN	2.64434	NaN	NaN	NaN	NaN	0.189764	-2.6834	6.65944	10.7539	-4.79314
	3.7683	-2.54511	NaN	NaN	NaN	NaN	NaN	NaN	NaN	-5.88613	-12.4136	NaN	NaN	NaN	NaN	0.991868	NaN	NaN	NaN	NaN	NaN	NaN	NaN	-1.23841	9.97798	NaN	10.5881	NaN	-0.0766827	3.45277	NaN	NaN	-4.21116	NaN	29.8018	NaN	NaN	NaN	NaN	1.24663	NaN	NaN	NaN	NaN	-2.74109	-4.52424	2.38014	10.6786	-5.33734
	7.4127	-2.66597	NaN	NaN	NaN	NaN	NaN	NaN	NaN	-5.57068	-11.6132	NaN	NaN	NaN	NaN	3.88609	NaN	NaN	NaN	NaN	NaN	NaN	NaN	-2.0249	9.70395	NaN	11.6076	NaN	3.29486	2.75429	NaN	NaN	-2.84957	NaN	17.1567	NaN	NaN	NaN	NaN	0.839302	NaN	NaN	NaN	NaN	-0.85464	-4.03356	1.77265	11.7923	-4.12195
	5.69634	-3.43643	NaN	NaN	NaN	NaN	NaN	NaN	NaN	-7.03072	-12.2341	NaN	NaN	NaN	NaN	2.75082	NaN	NaN	NaN	NaN	NaN	NaN	NaN	-2.33998	5.61558	NaN	10.4629	NaN	2.17661	1.78843	NaN	NaN	-3.6254	NaN	26.9608	NaN	NaN	NaN	NaN	0.137755	NaN	NaN	NaN	NaN	-2.57667	-4.57651	-0.0544538	13.4339	-4.64431
	9.02508	-2.05706	NaN	NaN	NaN	NaN	NaN	NaN	NaN	-5.87881	-11.9494	NaN	NaN	NaN	NaN	5.78082	NaN	NaN	NaN	NaN	NaN	NaN	NaN	-1.83163	5.87111	NaN	9.87919	NaN	6.70105	1.74656	NaN	NaN	-3.36138	NaN	7.5165	NaN	NaN	NaN	NaN	1.39827	NaN	NaN	NaN	NaN	0.0408631	-4.92021	-1.17409	12.6521	-5.5023
	9.43232	-20.6124	NaN	NaN	NaN	NaN	NaN	NaN	NaN	-8.20925	-12.355	NaN	NaN	NaN	NaN	3.62555	NaN	NaN	NaN	NaN	NaN	NaN	NaN	-2.28621	1.44609	NaN	6.60847	NaN	7.34542	1.85367	NaN	NaN	-5.84004	NaN	4.88573	NaN	NaN	NaN	NaN	0.783061	NaN	NaN	NaN	NaN	-0.0900303	-5.19878	-3.19118	12.979	-6.10185
	13.3065	-2.60554	NaN	NaN	NaN	NaN	NaN	NaN	NaN	-6.82411	-11.9033	NaN	NaN	NaN	NaN	4.40661	NaN	NaN	NaN	NaN	NaN	NaN	NaN	-2.40727	1.72419	NaN	6.21179	NaN	11.1246	1.04631	NaN	NaN	-5.24229	NaN	4.28832	NaN	NaN	NaN	NaN	1.91505	NaN	NaN	NaN	NaN	3.98863	-4.20879	-2.83687	17.6986	-4.97749
	14.1806	-17.3253	NaN	NaN	NaN	NaN	NaN	NaN	NaN	-7.38329	-12.0256	NaN	NaN	NaN	NaN	7.52924	NaN	NaN	NaN	NaN	NaN	NaN	NaN	-2.9174	0.811292	NaN	3.08145	NaN	9.95187	1.80982	NaN	NaN	-5.73171	NaN	2.4096	NaN	NaN	NaN	NaN	1.49436	NaN	NaN	NaN	NaN	6.04629	-4.53771	-5.17914	18.015	-6.6266
	15.7386	-14.0927	NaN	NaN	NaN	NaN	NaN	NaN	NaN	-5.79502	-12.0917	NaN	NaN	NaN	NaN	10.1011	NaN	NaN	NaN	NaN	NaN	NaN	NaN	-2.39817	3.71598	NaN	3.31209	NaN	4.43883	0.846959	NaN	NaN	-4.45619	NaN	2.48937	NaN	NaN	NaN	NaN	-0.0539489	NaN	NaN	NaN	NaN	9.4086	-2.97809	-3.95739	18.9956	-5.42594
	18.6373	-14.1958	NaN	NaN	NaN	NaN	NaN	NaN	NaN	-7.39512	-5.10414	NaN	NaN	NaN	NaN	11.1061	NaN	NaN	NaN	NaN	NaN	NaN	NaN	-3.04282	2.27967	NaN	3.36282	NaN	7.02323	1.69134	NaN	NaN	-4.78095	NaN	1.82369	NaN	NaN	NaN	NaN	-0.26008	NaN	NaN	NaN	NaN	8.26472	-2.01997	-6.91001	21.6756	-6.06389
	23.5706	-11.609	NaN	NaN	NaN	NaN	NaN	NaN	NaN	-4.2484	-3.27834	NaN	NaN	NaN	NaN	13.7356	NaN	NaN	NaN	NaN	NaN	NaN	NaN	-2.40071	5.28326	NaN	7.11922	NaN	15.3949	0.666111	NaN	NaN	-2.89212	NaN	3.55674	NaN	NaN	NaN	NaN	0.463459	NaN	NaN	NaN	NaN	11.3465	-0.754446	-6.7765	25.0517	-5.15257
	20.6041	-6.78923	NaN	NaN	NaN	NaN	NaN	NaN	NaN	-3.84666	-2.69516	NaN	NaN	NaN	NaN	12.6628	NaN	NaN	NaN	NaN	NaN	NaN	NaN	-1.59877	5.50826	NaN	8.86875	NaN	17.3964	2.98757	NaN	NaN	-5.70721	NaN	3.594	NaN	NaN	NaN	NaN	0.0972306	NaN	NaN	NaN	NaN	10.2297	-1.53155	-11.3151	24.9562	-4.37976
	25.1124	-3.04624	NaN	NaN	NaN	NaN	NaN	NaN	NaN	-6.58915	1.21198	NaN	NaN	NaN	NaN	15.9675	NaN	NaN	NaN	NaN	NaN	NaN	NaN	-0.37027	8.04776	NaN	3.19677	NaN	20.2056	5.56265	NaN	NaN	-3.58073	NaN	5.49267	NaN	NaN	NaN	NaN	2.41127	NaN	NaN	NaN	NaN	11.8154	2.26652	-8.08946	28.2443	-2.9086
	25.0447	0.677522	NaN	NaN	NaN	NaN	NaN	NaN	NaN	5.50568	1.76501	NaN	NaN	NaN	NaN	15.8304	NaN	NaN	NaN	NaN	NaN	NaN	NaN	0.9366	7.50505	NaN	14.1075	NaN	21.04	4.93653	NaN	NaN	-4.19998	NaN	4.41235	NaN	NaN	NaN	NaN	2.3435	NaN	NaN	NaN	NaN	9.53844	0.875731	-10.078	31.1342	-1.72643
	21.104	-12.9024	NaN	NaN	NaN	NaN	NaN	NaN	NaN	7.82953	5.07367	NaN	NaN	NaN	NaN	16.4431	NaN	NaN	NaN	NaN	NaN	NaN	NaN	4.32003	8.57342	NaN	16.4371	NaN	23.0732	6.64448	NaN	NaN	-1.34532	NaN	8.11719	NaN	NaN	NaN	NaN	3.26589	NaN	NaN	NaN	NaN	13.818	0.323754	-8.64685	35.9198	-0.536905
	34.2913	9.23636	NaN	NaN	NaN	NaN	NaN	NaN	NaN	10.4466	5.04164	NaN	NaN	NaN	NaN	15.6316	NaN	NaN	NaN	NaN	NaN	NaN	NaN	5.21145	8.44849	NaN	16.5045	NaN	23.8051	7.42816	NaN	NaN	0.440971	NaN	9.16443	NaN	NaN	NaN	NaN	3.6068	NaN	NaN	NaN	NaN	18.252	0.236385	-8.32571	39.5701	0.886403
	36.6317	-4.91774	NaN	NaN	NaN	NaN	NaN	NaN	NaN	-5.21791	6.58439	NaN	NaN	NaN	NaN	17.6155	NaN	NaN	NaN	NaN	NaN	NaN	NaN	7.73187	12.0634	NaN	18.5723	NaN	25.4971	8.71381	NaN	NaN	4.27641	NaN	11.6168	NaN	NaN	NaN	NaN	5.96536	NaN	NaN	NaN	NaN	22.573	1.03988	-5.646	26.6002	2.28716
	38.7876	15.6122	NaN	NaN	NaN	NaN	NaN	NaN	NaN	17.697	6.15482	NaN	NaN	NaN	NaN	17.1041	NaN	NaN	NaN	NaN	NaN	NaN	NaN	7.71835	11.6461	NaN	19.5023	NaN	24.344	11.3941	NaN	NaN	4.0484	NaN	13.5417	NaN	NaN	NaN	NaN	6.16911	NaN	NaN	NaN	NaN	21.5126	1.08353	-4.60711	29.6893	6.14624
	23.0743	19.5814	NaN	NaN	NaN	NaN	NaN	NaN	NaN	20.5029	8.54366	NaN	NaN	NaN	NaN	20.7531	NaN	NaN	NaN	NaN	NaN	NaN	NaN	8.24075	13.7595	NaN	24.0375	NaN	23.9703	5.7905	NaN	NaN	-2.77265	NaN	17.9078	NaN	NaN	NaN	NaN	7.63601	NaN	NaN	NaN	NaN	21.3614	4.89779	-9.36244	33.527	8.94299
	46.5456	23.2182	NaN	NaN	NaN	NaN	NaN	NaN	NaN	19.8835	7.75663	NaN	NaN	NaN	NaN	20.5584	NaN	NaN	NaN	NaN	NaN	NaN	NaN	9.01836	13.177	NaN	24.6826	NaN	25.0415	-10.6692	NaN	NaN	14.7819	NaN	15.761	NaN	NaN	NaN	NaN	8.63991	NaN	NaN	NaN	NaN	20.1337	6.59724	2.8456	37.745	11.8587
	51.089	23.9061	NaN	NaN	NaN	NaN	NaN	NaN	NaN	2.61434	10.0455	NaN	NaN	NaN	NaN	23.2233	NaN	NaN	NaN	NaN	NaN	NaN	NaN	10.6524	14.3659	NaN	28.3815	NaN	28.0698	-8.85597	NaN	NaN	19.1159	NaN	18.7307	NaN	NaN	NaN	NaN	12.4661	NaN	NaN	NaN	NaN	20.6598	11.1304	7.7633	33.0852	1.58678
	50.1614	24.4746	NaN	NaN	NaN	NaN	NaN	NaN	NaN	26.9864	8.65181	NaN	NaN	NaN	NaN	20.8223	NaN	NaN	NaN	NaN	NaN	NaN	NaN	13.4539	12.1791	NaN	28.3829	NaN	29.2317	-9.25658	NaN	NaN	19.2093	NaN	16.9815	NaN	NaN	NaN	NaN	15.3029	NaN	NaN	NaN	NaN	16.7479	11.6856	7.74182	28.1447	-1.89464
	49.5532	24.3978	NaN	NaN	NaN	NaN	NaN	NaN	NaN	30.605	8.80863	NaN	NaN	NaN	NaN	21.5361	NaN	NaN	NaN	NaN	NaN	NaN	NaN	13.9094	13.5017	NaN	30.688	NaN	30.373	-4.42613	NaN	NaN	23.0547	NaN	20.011	NaN	NaN	NaN	NaN	19.2151	NaN	NaN	NaN	NaN	15.6056	15.4068	-6.98477	31.6081	7.54461
	47.6355	25.1548	NaN	NaN	NaN	NaN	NaN	NaN	NaN	35.2739	7.97234	NaN	NaN	NaN	NaN	21.211	NaN	NaN	NaN	NaN	NaN	NaN	NaN	15.5599	12.679	NaN	30.1679	NaN	30.5879	-7.08179	NaN	NaN	26.2971	NaN	20.5418	NaN	NaN	NaN	NaN	20.9001	NaN	NaN	NaN	NaN	14.9805	17.3542	17.2539	40.4407	7.21554
	44.9251	25.3295	NaN	NaN	NaN	NaN	NaN	NaN	NaN	39.0049	4.31608	NaN	NaN	NaN	NaN	20.2906	NaN	NaN	NaN	NaN	NaN	NaN	NaN	16.8977	10.684	NaN	26.5985	NaN	29.409	-9.76256	NaN	NaN	26.0994	NaN	22.8839	NaN	NaN	NaN	NaN	22.8822	NaN	NaN	NaN	NaN	16.82	19.3225	5.30445	43.3725	11.438
	43.0004	24.1468	NaN	NaN	NaN	NaN	NaN	NaN	NaN	39.6609	2.3308	NaN	NaN	NaN	NaN	18.4722	NaN	NaN	NaN	NaN	NaN	NaN	NaN	17.1648	10.1067	NaN	24.6082	NaN	26.7926	6.19879	NaN	NaN	29.5345	NaN	25.0293	NaN	NaN	NaN	NaN	22.5739	NaN	NaN	NaN	NaN	15.2074	19.7926	26.1316	43.265	13.7517
	42.7998	24.0381	NaN	NaN	NaN	NaN	NaN	NaN	NaN	44.2431	3.43912	NaN	NaN	NaN	NaN	21.2202	NaN	NaN	NaN	NaN	NaN	NaN	NaN	16.9236	10.9149	NaN	25.1097	NaN	26.6959	22.1601	NaN	NaN	21.132	NaN	27.4969	NaN	NaN	NaN	NaN	24.8231	NaN	NaN	NaN	NaN	15.0876	22.9904	0.378523	44.0398	2.82499
	41.8397	23.4089	NaN	NaN	NaN	NaN	NaN	NaN	NaN	40.0135	2.83864	NaN	NaN	NaN	NaN	21.7689	NaN	NaN	NaN	NaN	NaN	NaN	NaN	17.2584	10.416	NaN	23.3211	NaN	25.0296	23.9758	NaN	NaN	37.8091	NaN	28.0604	NaN	NaN	NaN	NaN	21.914	NaN	NaN	NaN	NaN	17.4261	24.2667	5.82886	43.7064	22.2413
	43.553	23.8075	NaN	NaN	NaN	NaN	NaN	NaN	NaN	42.7081	5.4253	NaN	NaN	NaN	NaN	25.7119	NaN	NaN	NaN	NaN	NaN	NaN	NaN	17.4066	13.5759	NaN	23.4952	NaN	26.1266	24.1918	NaN	NaN	41.7788	NaN	30.2219	NaN	NaN	NaN	NaN	22.7303	NaN	NaN	NaN	NaN	18.9913	18.3383	11.2792	45.9664	27.0633
	41.6593	24.6938	NaN	NaN	NaN	NaN	NaN	NaN	NaN	43.2056	3.83398	NaN	NaN	NaN	NaN	27.6361	NaN	NaN	NaN	NaN	NaN	NaN	NaN	16.4709	12.8878	NaN	22.4518	NaN	25.1634	6.34625	NaN	NaN	44.2633	NaN	30.6649	NaN	NaN	NaN	NaN	20.5645	NaN	NaN	NaN	NaN	18.9558	31.295	39.8371	44.6414	28.9473
	43.7804	26.5695	NaN	NaN	NaN	NaN	NaN	NaN	NaN	45.6831	3.93941	NaN	NaN	NaN	NaN	30.2055	NaN	NaN	NaN	NaN	NaN	NaN	NaN	16.8716	16.0341	NaN	24.4175	NaN	25.6758	1.86061	NaN	NaN	25.3333	NaN	32.0991	NaN	NaN	NaN	NaN	20.3038	NaN	NaN	NaN	NaN	19.6732	34.2121	42.9219	45.2362	8.28832
	43.3581	27.9743	NaN	NaN	NaN	NaN	NaN	NaN	NaN	46.5645	1.3269	NaN	NaN	NaN	NaN	28.2928	NaN	NaN	NaN	NaN	NaN	NaN	NaN	15.0178	13.8149	NaN	20.6307	NaN	27.6667	1.69867	NaN	NaN	49.6011	NaN	31.5957	NaN	NaN	NaN	NaN	18.9559	NaN	NaN	NaN	NaN	18.0392	34.2199	42.0391	43.1444	36.055
	46.1727	31.6563	NaN	NaN	NaN	NaN	NaN	NaN	NaN	47.3469	0.632087	NaN	NaN	NaN	NaN	30.1404	NaN	NaN	NaN	NaN	NaN	NaN	NaN	14.7762	16.8525	NaN	20.9299	NaN	28.9825	4.46673	NaN	NaN	50.0463	NaN	33.4473	NaN	NaN	NaN	NaN	19.5638	NaN	NaN	NaN	NaN	20.0425	37.2045	42.1546	45.2027	24.6523
	46.2464	31.9323	NaN	NaN	NaN	NaN	NaN	NaN	NaN	45.2331	0.529331	NaN	NaN	NaN	NaN	26.3934	NaN	NaN	NaN	NaN	NaN	NaN	NaN	11.3817	13.2318	NaN	20.6649	NaN	28.0583	3.22703	NaN	NaN	46.2992	NaN	33.2136	NaN	NaN	NaN	NaN	17.9324	NaN	NaN	NaN	NaN	20.3287	37.0535	39.9815	45.1327	41.1287
	49.8937	33.8361	NaN	NaN	NaN	NaN	NaN	NaN	NaN	45.5222	0.726172	NaN	NaN	NaN	NaN	28.9429	NaN	NaN	NaN	NaN	NaN	NaN	NaN	12.376	34.1947	NaN	20.9778	NaN	31.2504	5.33875	NaN	NaN	46.1754	NaN	34.444	NaN	NaN	NaN	NaN	18.3301	NaN	NaN	NaN	NaN	21.4578	37.7888	41.8849	46.8596	44.4621
	51.8698	35.1709	NaN	NaN	NaN	NaN	NaN	NaN	NaN	46.1238	0.844011	NaN	NaN	NaN	NaN	26.0116	NaN	NaN	NaN	NaN	NaN	NaN	NaN	10.066	33.5487	NaN	20.2918	NaN	28.6608	1.77964	NaN	NaN	42.4032	NaN	32.4347	NaN	NaN	NaN	NaN	18.3427	NaN	NaN	NaN	NaN	21.765	37.0631	39.2724	48.5987	45.2476
	54.1851	38.0856	NaN	NaN	NaN	NaN	NaN	NaN	NaN	38.0695	1.82161	NaN	NaN	NaN	NaN	28.7566	NaN	NaN	NaN	NaN	NaN	NaN	NaN	10.4911	36.0761	NaN	21.6635	NaN	27.4525	3.0827	NaN	NaN	40.7573	NaN	32.3483	NaN	NaN	NaN	NaN	18.2933	NaN	NaN	NaN	NaN	23.9398	37.5722	39.7553	50.6433	48.1982
	53.9942	37.532	NaN	NaN	NaN	NaN	NaN	NaN	NaN	46.29	1.90445	NaN	NaN	NaN	NaN	26.3389	NaN	NaN	NaN	NaN	NaN	NaN	NaN	9.68876	33.852	NaN	22.2872	NaN	27.0542	2.98423	NaN	NaN	36.1375	NaN	33.3305	NaN	NaN	NaN	NaN	18.2937	NaN	NaN	NaN	NaN	24.1404	36.3068	36.68	49.8233	49.6649
	57.2951	41.2	NaN	NaN	NaN	NaN	NaN	NaN	NaN	29.9486	4.97954	NaN	NaN	NaN	NaN	27.6681	NaN	NaN	NaN	NaN	NaN	NaN	NaN	10.036	37.0447	NaN	24.5703	NaN	27.8675	3.37553	NaN	NaN	36.7595	NaN	24.722	NaN	NaN	NaN	NaN	18.8695	NaN	NaN	NaN	NaN	26.1821	36.9306	36.3404	52.1914	52.7878
	56.6631	42.4345	NaN	NaN	NaN	NaN	NaN	NaN	NaN	25.0049	4.28729	NaN	NaN	NaN	NaN	27.4772	NaN	NaN	NaN	NaN	NaN	NaN	NaN	9.07599	35.1513	NaN	25.0662	NaN	27.137	-0.620735	NaN	NaN	32.1808	NaN	33.4394	NaN	NaN	NaN	NaN	18.0517	NaN	NaN	NaN	NaN	25.3517	37.124	33.4808	50.8995	52.4868
	58.7995	45.1659	NaN	NaN	NaN	NaN	NaN	NaN	NaN	24.7673	8.68875	NaN	NaN	NaN	NaN	29.5141	NaN	NaN	NaN	NaN	NaN	NaN	NaN	11.5144	34.9764	NaN	29.1066	NaN	29.3576	0.445259	NaN	NaN	31.2427	NaN	14.018	NaN	NaN	NaN	NaN	18.2868	NaN	NaN	NaN	NaN	27.1239	37.7728	32.3838	53.7172	54.0839
	58.4478	46.4646	NaN	NaN	NaN	NaN	NaN	NaN	NaN	25.3475	8.19348	NaN	NaN	NaN	NaN	26.0277	NaN	NaN	NaN	NaN	NaN	NaN	NaN	12.9145	30.347	NaN	30.1982	NaN	28.5934	-3.39711	NaN	NaN	30.4976	NaN	32.8394	NaN	NaN	NaN	NaN	18.1323	NaN	NaN	NaN	NaN	26.8753	34.1999	28.4243	51.7555	51.3162
	59.0859	39.366	NaN	NaN	NaN	NaN	NaN	NaN	NaN	26.258	9.52977	NaN	NaN	NaN	NaN	27.603	NaN	NaN	NaN	NaN	NaN	NaN	NaN	14.3058	29.4293	NaN	31.8762	NaN	29.7631	-2.42787	NaN	NaN	30.5907	NaN	6.4882	NaN	NaN	NaN	NaN	18.2224	NaN	NaN	NaN	NaN	29.5499	35.2965	27.2065	52.8836	50.8064
	58.8462	52.8684	NaN	NaN	NaN	NaN	NaN	NaN	NaN	26.6637	9.56605	NaN	NaN	NaN	NaN	26.7451	NaN	NaN	NaN	NaN	NaN	NaN	NaN	13.8236	36.098	NaN	31.5636	NaN	30.0266	-5.64721	NaN	NaN	27.9709	NaN	2.18858	NaN	NaN	NaN	NaN	18.8417	NaN	NaN	NaN	NaN	29.6983	30.4601	25.0574	51.1115	48.0147
	60.1977	57.2943	NaN	NaN	NaN	NaN	NaN	NaN	NaN	29.3047	12.5913	NaN	NaN	NaN	NaN	27.1142	NaN	NaN	NaN	NaN	NaN	NaN	NaN	15.5289	23.904	NaN	35.1784	NaN	31.0124	-5.31675	NaN	NaN	31.7117	NaN	2.55692	NaN	NaN	NaN	NaN	18.9013	NaN	NaN	NaN	NaN	31.4376	29.2705	26.4014	50.2985	47.4457
	58.646	58.1296	NaN	NaN	NaN	NaN	NaN	NaN	NaN	30.629	13.058	NaN	NaN	NaN	NaN	28.7106	NaN	NaN	NaN	NaN	NaN	NaN	NaN	14.986	32.6617	NaN	34.3847	NaN	30.9293	-8.44028	NaN	NaN	33.6801	NaN	0.74206	NaN	NaN	NaN	NaN	18.9093	NaN	NaN	NaN	NaN	32.3513	26.7903	26.0967	45.8332	45.0931
	60.8618	60.9624	NaN	NaN	NaN	NaN	NaN	NaN	NaN	32.6513	14.9748	NaN	NaN	NaN	NaN	28.3463	NaN	NaN	NaN	NaN	NaN	NaN	NaN	14.8903	11.6201	NaN	36.6797	NaN	31.204	-6.74488	NaN	NaN	30.5442	NaN	1.30387	NaN	NaN	NaN	NaN	19.1074	NaN	NaN	NaN	NaN	33.8887	26.7029	26.5602	45.1841	49.0974
	59.1639	59.9479	NaN	NaN	NaN	NaN	NaN	NaN	NaN	32.1671	13.056	NaN	NaN	NaN	NaN	28.9866	NaN	NaN	NaN	NaN	NaN	NaN	NaN	12.4421	8.2544	NaN	36.519	NaN	30.4927	-7.83423	NaN	NaN	40.9267	NaN	1.26313	NaN	NaN	NaN	NaN	19.0787	NaN	NaN	NaN	NaN	31.5329	26.5136	26.9808	51.9976	46.0424
	58.7985	63.3726	NaN	NaN	NaN	NaN	NaN	NaN	NaN	35.5025	13.378	NaN	NaN	NaN	NaN	26.9296	NaN	NaN	NaN	NaN	NaN	NaN	NaN	11.6918	7.15473	NaN	38.4281	NaN	31.7114	-7.36267	NaN	NaN	43.4995	NaN	1.15764	NaN	NaN	NaN	NaN	20.3242	NaN	NaN	NaN	NaN	31.3924	26.4737	30.6819	33.0042	46.6921
	54.5656	63.1004	NaN	NaN	NaN	NaN	NaN	NaN	NaN	36.3524	10.7422	NaN	NaN	NaN	NaN	32.491	NaN	NaN	NaN	NaN	NaN	NaN	NaN	8.54902	5.55634	NaN	36.7166	NaN	29.8366	-8.9723	NaN	NaN	43.7961	NaN	1.3514	NaN	NaN	NaN	NaN	18.8385	NaN	NaN	NaN	NaN	30.0325	26.0955	29.5042	48.0659	46.3189
	53.198	63.2592	NaN	NaN	NaN	NaN	NaN	NaN	NaN	39.3833	9.86495	NaN	NaN	NaN	NaN	36.3449	NaN	NaN	NaN	NaN	NaN	NaN	NaN	8.49244	4.83565	NaN	38.3448	NaN	31.074	-7.35153	NaN	NaN	48.103	NaN	2.70911	NaN	NaN	NaN	NaN	21.3226	NaN	NaN	NaN	NaN	30.1328	27.6545	33.8744	23.6931	47.3568
	60.0128	60.9842	NaN	NaN	NaN	NaN	NaN	NaN	NaN	42.6533	8.11631	NaN	NaN	NaN	NaN	33.8369	NaN	NaN	NaN	NaN	NaN	NaN	NaN	7.08275	3.61885	NaN	34.6073	NaN	29.3438	-6.99146	NaN	NaN	47.4357	NaN	3.91579	NaN	NaN	NaN	NaN	19.0152	NaN	NaN	NaN	NaN	28.9373	27.6871	36.3541	21.6475	45.4564
	46.8329	60.0156	NaN	NaN	NaN	NaN	NaN	NaN	NaN	45.1775	7.13561	NaN	NaN	NaN	NaN	35.2261	NaN	NaN	NaN	NaN	NaN	NaN	NaN	6.4906	2.72921	NaN	34.3979	NaN	28.8946	-6.59573	NaN	NaN	51.8916	NaN	6.54474	NaN	NaN	NaN	NaN	20.5323	NaN	NaN	NaN	NaN	30.0386	28.4213	37.7897	19.6366	49.0054
	46.9175	57.3925	NaN	NaN	NaN	NaN	NaN	NaN	NaN	45.5663	4.3992	NaN	NaN	NaN	NaN	36.0222	NaN	NaN	NaN	NaN	NaN	NaN	NaN	5.96888	3.17225	NaN	34.0413	NaN	28.2727	-4.57563	NaN	NaN	54.2557	NaN	9.10534	NaN	NaN	NaN	NaN	19.3973	NaN	NaN	NaN	NaN	31.189	29.4918	38.6636	19.461	50.2338
	44.6718	54.7958	NaN	NaN	NaN	NaN	NaN	NaN	NaN	47.316	3.50925	NaN	NaN	NaN	NaN	32.8494	NaN	NaN	NaN	NaN	NaN	NaN	NaN	3.91599	5.196	NaN	32.4545	NaN	30.4553	-3.43013	NaN	NaN	56.6769	NaN	11.0706	NaN	NaN	NaN	NaN	18.3768	NaN	NaN	NaN	NaN	30.0178	27.3102	41.3886	20.3285	50.6303
	42.8337	51.8509	NaN	NaN	NaN	NaN	NaN	NaN	NaN	46.1197	3.05218	NaN	NaN	NaN	NaN	30.4626	NaN	NaN	NaN	NaN	NaN	NaN	NaN	3.72399	5.65937	NaN	30.6253	NaN	30.2089	-7.1715	NaN	NaN	55.5012	NaN	9.84612	NaN	NaN	NaN	NaN	18.0789	NaN	NaN	NaN	NaN	27.4652	27.8091	39.4159	17.9478	50.528
	43.0993	52.8598	NaN	NaN	NaN	NaN	NaN	NaN	NaN	45.9528	3.93837	NaN	NaN	NaN	NaN	31.8224	NaN	NaN	NaN	NaN	NaN	NaN	NaN	3.74574	8.58693	NaN	33.0651	NaN	16.9909	-6.7936	NaN	NaN	59.9302	NaN	11.4096	NaN	NaN	NaN	NaN	18.0464	NaN	NaN	NaN	NaN	27.2265	30.4432	40.5018	19.8592	52.1818
	42.7225	49.466	NaN	NaN	NaN	NaN	NaN	NaN	NaN	41.3643	2.63993	NaN	NaN	NaN	NaN	29.9376	NaN	NaN	NaN	NaN	NaN	NaN	NaN	3.24904	8.54802	NaN	31.5212	NaN	17.595	2.27166	NaN	NaN	58.999	NaN	11.5773	NaN	NaN	NaN	NaN	17.3007	NaN	NaN	NaN	NaN	23.8556	31.2967	38.2935	18.4214	52.0272
	44.0694	49.224	NaN	NaN	NaN	NaN	NaN	NaN	NaN	43.3128	2.89899	NaN	NaN	NaN	NaN	33.1189	NaN	NaN	NaN	NaN	NaN	NaN	NaN	3.29915	11.5038	NaN	33.26	NaN	18.4559	5.04301	NaN	NaN	60.3951	NaN	10.8532	NaN	NaN	NaN	NaN	18.8879	NaN	NaN	NaN	NaN	22.4043	32.9337	38.0709	20.5497	53.3706
	44.2166	47.5091	NaN	NaN	NaN	NaN	NaN	NaN	NaN	43.7075	2.11557	NaN	NaN	NaN	NaN	28.5166	NaN	NaN	NaN	NaN	NaN	NaN	NaN	3.48882	9.55203	NaN	33.469	NaN	17.2126	5.66122	NaN	NaN	60.8149	NaN	10.7933	NaN	NaN	NaN	NaN	19.207	NaN	NaN	NaN	NaN	19.8457	32.3702	37.6836	19.1958	52.2551
	44.9929	47.9919	NaN	NaN	NaN	NaN	NaN	NaN	NaN	45.077	1.98996	NaN	NaN	NaN	NaN	28.051	NaN	NaN	NaN	NaN	NaN	NaN	NaN	6.1188	11.9538	NaN	34.7939	NaN	19.6638	7.17643	NaN	NaN	59.7602	NaN	11.2776	NaN	NaN	NaN	NaN	21.3141	NaN	NaN	NaN	NaN	20.6315	32.4615	38.4977	24.0558	51.7196
	43.9704	46.8373	NaN	NaN	NaN	NaN	NaN	NaN	NaN	43.7918	1.13051	NaN	NaN	NaN	NaN	25.0655	NaN	NaN	NaN	NaN	NaN	NaN	NaN	6.10288	8.97254	NaN	34.2774	NaN	18.0705	6.78207	NaN	NaN	61.6581	NaN	12.3675	NaN	NaN	NaN	NaN	21.4714	NaN	NaN	NaN	NaN	18.8328	31.0481	38.4083	24.516	49.6795
	45.0336	47.8433	NaN	NaN	NaN	NaN	NaN	NaN	NaN	44.7482	1.83562	NaN	NaN	NaN	NaN	24.5659	NaN	NaN	NaN	NaN	NaN	NaN	NaN	9.0898	12.9809	NaN	33.8455	NaN	18.1228	8.27569	NaN	NaN	58.8958	NaN	12.8876	NaN	NaN	NaN	NaN	23.6662	NaN	NaN	NaN	NaN	21.1598	30.5758	40.3171	28.7483	47.9005
	44.4934	47.1836	NaN	NaN	NaN	NaN	NaN	NaN	NaN	43.2369	1.26465	NaN	NaN	NaN	NaN	23.6587	NaN	NaN	NaN	NaN	NaN	NaN	NaN	7.5693	8.3062	NaN	35.2976	NaN	17.742	7.71993	NaN	NaN	58.4944	NaN	13.8969	NaN	NaN	NaN	NaN	23.0659	NaN	NaN	NaN	NaN	19.6686	28.717	40.2639	30.8494	44.6872
	46.2193	48.2781	NaN	NaN	NaN	NaN	NaN	NaN	NaN	44.9996	2.16417	NaN	NaN	NaN	NaN	25.7555	NaN	NaN	NaN	NaN	NaN	NaN	NaN	7.63734	10.4853	NaN	34.1314	NaN	17.7688	8.46847	NaN	NaN	58.0683	NaN	15.4959	NaN	NaN	NaN	NaN	25.3945	NaN	NaN	NaN	NaN	20.8855	27.8389	40.6229	34.9566	43.2424
	44.5584	48.4784	NaN	NaN	NaN	NaN	NaN	NaN	NaN	45.1833	2.69111	NaN	NaN	NaN	NaN	24.3859	NaN	NaN	NaN	NaN	NaN	NaN	NaN	5.846	7.97059	NaN	41.3961	NaN	16.5085	6.37405	NaN	NaN	55.8732	NaN	14.9417	NaN	NaN	NaN	NaN	25.3877	NaN	NaN	NaN	NaN	16.0494	25.273	40.294	35.2916	40.3513
	46.1991	50.7811	NaN	NaN	NaN	NaN	NaN	NaN	NaN	46.3104	3.39109	NaN	NaN	NaN	NaN	26.8238	NaN	NaN	NaN	NaN	NaN	NaN	NaN	4.19906	9.1324	NaN	34.0614	NaN	17.1815	6.77274	NaN	NaN	58.248	NaN	16.3279	NaN	NaN	NaN	NaN	27.5843	NaN	NaN	NaN	NaN	16.2783	25.1298	41.1325	26.6322	40.9027
	46.2045	51.498	NaN	NaN	NaN	NaN	NaN	NaN	NaN	47.6221	3.69944	NaN	NaN	NaN	NaN	25.6969	NaN	NaN	NaN	NaN	NaN	NaN	NaN	2.49932	9.93461	NaN	49.4804	NaN	15.7162	2.91523	NaN	NaN	57.3175	NaN	16.0847	NaN	NaN	NaN	NaN	27.785	NaN	NaN	NaN	NaN	12.793	21.7168	41.425	38.7657	39.143
	47.3325	56.1523	NaN	NaN	NaN	NaN	NaN	NaN	NaN	48.4846	4.77574	NaN	NaN	NaN	NaN	28.9155	NaN	NaN	NaN	NaN	NaN	NaN	NaN	2.3267	12.4037	NaN	53.6849	NaN	16.6251	3.94373	NaN	NaN	59.0566	NaN	17.6107	NaN	NaN	NaN	NaN	28.0187	NaN	NaN	NaN	NaN	12.7923	21.4884	41.6248	41.0505	38.3886
	47.4681	57.2778	NaN	NaN	NaN	NaN	NaN	NaN	NaN	47.2346	6.21314	NaN	NaN	NaN	NaN	27.7291	NaN	NaN	NaN	NaN	NaN	NaN	NaN	1.77608	11.1303	NaN	52.4391	NaN	15.8873	0.943438	NaN	NaN	58.6003	NaN	18.3598	NaN	NaN	NaN	NaN	26.335	NaN	NaN	NaN	NaN	12.6938	18.8799	40.2399	40.5094	37.5801
	49.1162	59.8729	NaN	NaN	NaN	NaN	NaN	NaN	NaN	49.353	8.27626	NaN	NaN	NaN	NaN	28.7166	NaN	NaN	NaN	NaN	NaN	NaN	NaN	3.59284	11.8033	NaN	55.3092	NaN	18.3407	0.768538	NaN	NaN	59.6372	NaN	19.2421	NaN	NaN	NaN	NaN	26.7776	NaN	NaN	NaN	NaN	14.2704	18.3488	39.8892	43.6304	38.3088
	50.9904	59.9877	NaN	NaN	NaN	NaN	NaN	NaN	NaN	48.8119	10.5353	NaN	NaN	NaN	NaN	27.7657	NaN	NaN	NaN	NaN	NaN	NaN	NaN	2.9276	9.6611	NaN	53.808	NaN	16.8671	-1.03883	NaN	NaN	60.5789	NaN	19.5651	NaN	NaN	NaN	NaN	24.8366	NaN	NaN	NaN	NaN	14.79	14.2464	37.267	41.5462	36.6492
	54.0639	63.904	NaN	NaN	NaN	NaN	NaN	NaN	NaN	50.7454	11.4698	NaN	NaN	NaN	NaN	28.4625	NaN	NaN	NaN	NaN	NaN	NaN	NaN	4.9976	10.9853	NaN	55.5891	NaN	17.7812	-1.83613	NaN	NaN	60.5637	NaN	23.6712	NaN	NaN	NaN	NaN	23.5049	NaN	NaN	NaN	NaN	19.0965	13.8834	38.0629	43.0316	38.2121
	55.3057	63.6984	NaN	NaN	NaN	NaN	NaN	NaN	NaN	49.8189	11.7611	NaN	NaN	NaN	NaN	28.955	NaN	NaN	NaN	NaN	NaN	NaN	NaN	5.13923	10.4451	NaN	54.5852	NaN	18.032	-1.14992	NaN	NaN	58.3094	NaN	20.1345	NaN	NaN	NaN	NaN	20.205	NaN	NaN	NaN	NaN	18.2467	12.7976	36.5724	41.8126	39.5503
	57.0774	65.4336	NaN	NaN	NaN	NaN	NaN	NaN	NaN	50.3036	11.9124	NaN	NaN	NaN	NaN	31.4373	NaN	NaN	NaN	NaN	NaN	NaN	NaN	7.84494	9.87026	NaN	54.6269	NaN	20.5525	1.14717	NaN	NaN	57.9059	NaN	24.1424	NaN	NaN	NaN	NaN	19.8372	NaN	NaN	NaN	NaN	19.3019	13.4158	38.5667	43.4372	41.2064
	56.428	64.5197	NaN	NaN	NaN	NaN	NaN	NaN	NaN	48.6027	9.60528	NaN	NaN	NaN	NaN	29.8849	NaN	NaN	NaN	NaN	NaN	NaN	NaN	7.50689	8.88621	NaN	51.3847	NaN	22.0736	0.859269	NaN	NaN	54.5429	NaN	23.5878	NaN	NaN	NaN	NaN	19.1898	NaN	NaN	NaN	NaN	19.2046	12.0107	38.3999	43.547	41.5192
	56.9747	66.0866	NaN	NaN	NaN	NaN	NaN	NaN	NaN	48.4034	9.87321	NaN	NaN	NaN	NaN	31.4788	NaN	NaN	NaN	NaN	NaN	NaN	NaN	9.90533	8.48007	NaN	52.6543	NaN	24.0827	3.51251	NaN	NaN	53.954	NaN	25.074	NaN	NaN	NaN	NaN	19.1824	NaN	NaN	NaN	NaN	22.5407	12.6787	39.801	44.7774	42.5713
	53.1286	66.9453	NaN	NaN	NaN	NaN	NaN	NaN	NaN	47.2148	8.78034	NaN	NaN	NaN	NaN	29.8457	NaN	NaN	NaN	NaN	NaN	NaN	NaN	11.3118	7.75469	NaN	49.8292	NaN	22.7367	1.38597	NaN	NaN	59.4366	NaN	21.9029	NaN	NaN	NaN	NaN	17.8504	NaN	NaN	NaN	NaN	22.6642	12.1665	39.8499	44.1289	44.14
	52.1704	68.0826	NaN	NaN	NaN	NaN	NaN	NaN	NaN	46.7099	8.56485	NaN	NaN	NaN	NaN	30.7316	NaN	NaN	NaN	NaN	NaN	NaN	NaN	14.4633	8.27966	NaN	50.679	NaN	24.3722	3.22373	NaN	NaN	48.0244	NaN	22.1385	NaN	NaN	NaN	NaN	18.2104	NaN	NaN	NaN	NaN	27.2417	14.813	40.56	45.2821	47.4559
	48.168	65.3997	NaN	NaN	NaN	NaN	NaN	NaN	NaN	44.5127	8.10872	NaN	NaN	NaN	NaN	29.0274	NaN	NaN	NaN	NaN	NaN	NaN	NaN	14.7322	9.36709	NaN	48.7971	NaN	21.8947	5.21833	NaN	NaN	47.0101	NaN	23.0995	NaN	NaN	NaN	NaN	17.0899	NaN	NaN	NaN	NaN	29.3786	15.8229	40.5539	46.3576	47.7924
	46.3861	67.5772	NaN	NaN	NaN	NaN	NaN	NaN	NaN	44.2533	7.81885	NaN	NaN	NaN	NaN	29.0153	NaN	NaN	NaN	NaN	NaN	NaN	NaN	15.0684	12.5432	NaN	49.3546	NaN	21.7075	2.18589	NaN	NaN	47.2252	NaN	26.5997	NaN	NaN	NaN	NaN	18.6166	NaN	NaN	NaN	NaN	20.8726	15.78	42.9656	49.9421	50.5904
	44.9143	65.3311	NaN	NaN	NaN	NaN	NaN	NaN	NaN	42.4078	5.27606	NaN	NaN	NaN	NaN	24.4748	NaN	NaN	NaN	NaN	NaN	NaN	NaN	13.9334	12.6508	NaN	48.3072	NaN	20.9547	12.7854	NaN	NaN	48.0317	NaN	25.1981	NaN	NaN	NaN	NaN	16.7188	NaN	NaN	NaN	NaN	35.5017	15.2533	41.3816	48.378	50.654
	44.3161	66.2367	NaN	NaN	NaN	NaN	NaN	NaN	NaN	41.4643	6.42886	NaN	NaN	NaN	NaN	24.6524	NaN	NaN	NaN	NaN	NaN	NaN	NaN	13.2196	12.2154	NaN	48.0666	NaN	21.1272	17.381	NaN	NaN	48.6785	NaN	28.3442	NaN	NaN	NaN	NaN	17.0958	NaN	NaN	NaN	NaN	39.7313	16.8031	42.1037	52.2934	51.8491
	44.115	63.9097	NaN	NaN	NaN	NaN	NaN	NaN	NaN	38.9205	7.17734	NaN	NaN	NaN	NaN	26.7128	NaN	NaN	NaN	NaN	NaN	NaN	NaN	10.8477	12.9436	NaN	48.2817	NaN	22.3353	4.22103	NaN	NaN	50.1825	NaN	28.9792	NaN	NaN	NaN	NaN	16.4478	NaN	NaN	NaN	NaN	40.4665	18.5785	41.124	52.9551	52.5383
	43.7553	62.3046	NaN	NaN	NaN	NaN	NaN	NaN	NaN	34.6979	7.57183	NaN	NaN	NaN	NaN	26.5128	NaN	NaN	NaN	NaN	NaN	NaN	NaN	14.9003	7.97011	NaN	47.5329	NaN	23.8356	3.70211	NaN	NaN	50.9694	NaN	29.0227	NaN	NaN	NaN	NaN	16.7742	NaN	NaN	NaN	NaN	39.3029	19.6447	39.6569	54.4203	52.6322
	42.7193	61.4508	NaN	NaN	NaN	NaN	NaN	NaN	NaN	31.9783	5.3062	NaN	NaN	NaN	NaN	21.5807	NaN	NaN	NaN	NaN	NaN	NaN	NaN	2.56395	7.44667	NaN	45.0489	NaN	23.8261	27.2106	NaN	NaN	47.6285	NaN	27.4417	NaN	NaN	NaN	NaN	16.4432	NaN	NaN	NaN	NaN	41.5155	18.693	39.4898	51.499	49.9998
	43.5831	63.6432	NaN	NaN	NaN	NaN	NaN	NaN	NaN	32.3581	5.6402	NaN	NaN	NaN	NaN	24.1333	NaN	NaN	NaN	NaN	NaN	NaN	NaN	3.02714	9.00168	NaN	43.8878	NaN	24.1688	32.1859	NaN	NaN	40.9473	NaN	26.7712	NaN	NaN	NaN	NaN	17.0343	NaN	NaN	NaN	NaN	40.0714	19.8811	40.9245	53.5508	51.2656
	43.4802	61.954	NaN	NaN	NaN	NaN	NaN	NaN	NaN	29.1839	5.083	NaN	NaN	NaN	NaN	22.2764	NaN	NaN	NaN	NaN	NaN	NaN	NaN	2.36017	7.80624	NaN	40.9106	NaN	23.736	30.1633	NaN	NaN	39.9735	NaN	34.2457	NaN	NaN	NaN	NaN	16.5288	NaN	NaN	NaN	NaN	38.16	19.8294	40.9945	49.8479	47.4052
	44.7566	64.3581	NaN	NaN	NaN	NaN	NaN	NaN	NaN	30.0116	5.99476	NaN	NaN	NaN	NaN	23.9912	NaN	NaN	NaN	NaN	NaN	NaN	NaN	4.43264	9.80244	NaN	40.4098	NaN	23.7897	3.96157	NaN	NaN	39.017	NaN	35.9896	NaN	NaN	NaN	NaN	16.8012	NaN	NaN	NaN	NaN	37.315	20.5924	44.2046	48.3854	46.4306
	46.6288	61.5205	NaN	NaN	NaN	NaN	NaN	NaN	NaN	26.0313	4.72334	NaN	NaN	NaN	NaN	22.5379	NaN	NaN	NaN	NaN	NaN	NaN	NaN	3.17305	11.9537	NaN	37.4107	NaN	20.9538	16.8299	NaN	NaN	36.2003	NaN	37.504	NaN	NaN	NaN	NaN	16.025	NaN	NaN	NaN	NaN	32.7675	20.0894	45.0371	44.344	43.3141
	49.5377	63.4752	NaN	NaN	NaN	NaN	NaN	NaN	NaN	27.2716	5.90354	NaN	NaN	NaN	NaN	23.7666	NaN	NaN	NaN	NaN	NaN	NaN	NaN	3.50956	12.0016	NaN	37.0667	NaN	20.8381	29.6982	NaN	NaN	35.7624	NaN	27.1064	NaN	NaN	NaN	NaN	16.8215	NaN	NaN	NaN	NaN	33.2739	20.0147	45.8117	45.0139	42.618
	48.6958	61.0486	NaN	NaN	NaN	NaN	NaN	NaN	NaN	26.0609	5.46094	NaN	NaN	NaN	NaN	22.1687	NaN	NaN	NaN	NaN	NaN	NaN	NaN	2.12945	12.3875	NaN	33.4384	NaN	18.4883	48.6696	NaN	NaN	37.1114	NaN	44.2917	NaN	NaN	NaN	NaN	14.5565	NaN	NaN	NaN	NaN	32.2187	19.5424	44.7647	42.6729	40.4595
	50.5932	60.2228	NaN	NaN	NaN	NaN	NaN	NaN	NaN	26.3445	6.51872	NaN	NaN	NaN	NaN	23.2521	NaN	NaN	NaN	NaN	NaN	NaN	NaN	1.88219	15.565	NaN	33.9865	NaN	19.0871	43.9567	NaN	NaN	38.4314	NaN	46.6288	NaN	NaN	NaN	NaN	14.2295	NaN	NaN	NaN	NaN	33.4596	20.3101	45.508	43.5249	40.5423
	51.2101	58.2667	NaN	NaN	NaN	NaN	NaN	NaN	NaN	25.3682	4.99655	NaN	NaN	NaN	NaN	20.4075	NaN	NaN	NaN	NaN	NaN	NaN	NaN	0.675036	14.7342	NaN	32.6189	NaN	18.5764	39.2438	NaN	NaN	37.4208	NaN	46.3971	NaN	NaN	NaN	NaN	14.2601	NaN	NaN	NaN	NaN	32.2719	20.9771	43.9202	41.6376	37.1528
	55.2732	57.9599	NaN	NaN	NaN	NaN	NaN	NaN	NaN	27.9348	5.36214	NaN	NaN	NaN	NaN	20.618	NaN	NaN	NaN	NaN	NaN	NaN	NaN	0.905928	14.878	NaN	32.2911	NaN	21.4412	34.5309	NaN	NaN	38.8694	NaN	49.0788	NaN	NaN	NaN	NaN	14.341	NaN	NaN	NaN	NaN	32.1968	21.3747	44.0671	42.2077	38.6833
	54.6243	57.6018	NaN	NaN	NaN	NaN	NaN	NaN	NaN	28.8645	4.51344	NaN	NaN	NaN	NaN	17.773	NaN	NaN	NaN	NaN	NaN	NaN	NaN	0.619487	10.6221	NaN	30.7956	NaN	19.1239	60.0738	NaN	NaN	38.6469	NaN	48.8671	NaN	NaN	NaN	NaN	13.234	NaN	NaN	NaN	NaN	29.8427	20.7303	41.6967	40.1586	35.3436
	56.5476	59.9001	NaN	NaN	NaN	NaN	NaN	NaN	NaN	31.6767	5.00034	NaN	NaN	NaN	NaN	19.0368	NaN	NaN	NaN	NaN	NaN	NaN	NaN	1.84349	12.8696	NaN	31.5266	NaN	18.8054	64.6506	NaN	NaN	39.8349	NaN	49.9847	NaN	NaN	NaN	NaN	14.6791	NaN	NaN	NaN	NaN	30.1897	19.755	41.5526	41.9354	34.473
	57.0874	60.4723	NaN	NaN	NaN	NaN	NaN	NaN	NaN	33.9821	4.8211	NaN	NaN	NaN	NaN	16.3431	NaN	NaN	NaN	NaN	NaN	NaN	NaN	0.0114134	14.146	NaN	30.1746	NaN	16.2952	63.6335	NaN	NaN	39.2677	NaN	48.6827	NaN	NaN	NaN	NaN	13.8546	NaN	NaN	NaN	NaN	28.2371	19.3369	40.6635	41.0318	30.9725
	58.5446	63.4658	NaN	NaN	NaN	NaN	NaN	NaN	NaN	37.1377	6.98528	NaN	NaN	NaN	NaN	17.066	NaN	NaN	NaN	NaN	NaN	NaN	NaN	1.08603	16.4188	NaN	30.1964	NaN	18.1747	65.4614	NaN	NaN	41.8111	NaN	48.6179	NaN	NaN	NaN	NaN	12.5704	NaN	NaN	NaN	NaN	29.3031	19.0583	41.8619	43.4597	30.8198
	59.0317	63.5286	NaN	NaN	NaN	NaN	NaN	NaN	NaN	38.1442	6.6824	NaN	NaN	NaN	NaN	15.3686	NaN	NaN	NaN	NaN	NaN	NaN	NaN	0.732288	13.9855	NaN	29.6407	NaN	17.3958	64.9444	NaN	NaN	42.4604	NaN	46.3782	NaN	NaN	NaN	NaN	10.5494	NaN	NaN	NaN	NaN	28.1604	18.4254	39.4417	43.3802	27.7063
	62.2785	66.3988	NaN	NaN	NaN	NaN	NaN	NaN	NaN	41.1287	11.561	NaN	NaN	NaN	NaN	16.9634	NaN	NaN	NaN	NaN	NaN	NaN	NaN	3.94395	17.9169	NaN	30.4733	NaN	17.2959	65.6844	NaN	NaN	44.8633	NaN	45.6089	NaN	NaN	NaN	NaN	11.2193	NaN	NaN	NaN	NaN	29.817	19.4346	41.2001	41.047	28.8046
	61.6747	66.4692	NaN	NaN	NaN	NaN	NaN	NaN	NaN	41.5928	10.4892	NaN	NaN	NaN	NaN	17.7772	NaN	NaN	NaN	NaN	NaN	NaN	NaN	3.97885	13.7929	NaN	29.6128	NaN	17.5926	65.9272	NaN	NaN	45.3396	NaN	42.1842	NaN	NaN	NaN	NaN	9.25628	NaN	NaN	NaN	NaN	27.0962	17.3197	41.108	50.7476	26.1089
	63.6528	68.75	NaN	NaN	NaN	NaN	NaN	NaN	NaN	43.4725	12.5689	NaN	NaN	NaN	NaN	21.6349	NaN	NaN	NaN	NaN	NaN	NaN	NaN	6.60661	12.6321	NaN	32.7988	NaN	21.4517	66.5826	NaN	NaN	47.7762	NaN	42.1402	NaN	NaN	NaN	NaN	8.83272	NaN	NaN	NaN	NaN	27.39	17.3706	36.9881	54.0134	27.2345
	62.7163	69.3301	NaN	NaN	NaN	NaN	NaN	NaN	NaN	43.1494	12.4916	NaN	NaN	NaN	NaN	20.9301	NaN	NaN	NaN	NaN	NaN	NaN	NaN	6.39528	9.91694	NaN	33.76	NaN	21.1471	66.09	NaN	NaN	48.4691	NaN	39.4678	NaN	NaN	NaN	NaN	7.85225	NaN	NaN	NaN	NaN	25.063	14.5756	35.3225	55.5416	24.3853
	64.3573	71.6611	NaN	NaN	NaN	NaN	NaN	NaN	NaN	43.8478	12.8144	NaN	NaN	NaN	NaN	16.166	NaN	NaN	NaN	NaN	NaN	NaN	NaN	7.92655	9.99593	NaN	37.9222	NaN	22.0511	66.6845	NaN	NaN	51.1994	NaN	39.5916	NaN	NaN	NaN	NaN	8.8781	NaN	NaN	NaN	NaN	27.2973	14.4417	35.8838	56.9508	28.2403
	62.2413	73.9081	NaN	NaN	NaN	NaN	NaN	NaN	NaN	42.7885	9.96179	NaN	NaN	NaN	NaN	24.4315	NaN	NaN	NaN	NaN	NaN	NaN	NaN	8.3365	8.5951	NaN	37.2944	NaN	22.4401	66.3543	NaN	NaN	50.6848	NaN	36.1244	NaN	NaN	NaN	NaN	9.06987	NaN	NaN	NaN	NaN	27.507	12.5594	32.5298	57.1917	26.2929
	62.7488	77.5194	NaN	NaN	NaN	NaN	NaN	NaN	NaN	43.6519	10.1339	NaN	NaN	NaN	NaN	28.7036	NaN	NaN	NaN	NaN	NaN	NaN	NaN	11.2094	8.43587	NaN	41.0396	NaN	24.0887	67.0128	NaN	NaN	46.5579	NaN	39.8746	NaN	NaN	NaN	NaN	10.8529	NaN	NaN	NaN	NaN	31.0818	13.5993	34.2073	59.3463	26.2695
	61.0381	77.2581	NaN	NaN	NaN	NaN	NaN	NaN	NaN	41.2594	9.38651	NaN	NaN	NaN	NaN	27.6929	NaN	NaN	NaN	NaN	NaN	NaN	NaN	10.1281	8.12311	NaN	40.1623	NaN	23.858	66.0968	NaN	NaN	55.4447	NaN	40.1523	NaN	NaN	NaN	NaN	11.2055	NaN	NaN	NaN	NaN	32.4146	11.6044	33.9889	58.7956	25.3655
	61.0446	80.5325	NaN	NaN	NaN	NaN	NaN	NaN	NaN	40.5709	9.18566	NaN	NaN	NaN	NaN	30.1809	NaN	NaN	NaN	NaN	NaN	NaN	NaN	11.256	7.95201	NaN	40.7613	NaN	23.7494	65.5605	NaN	NaN	58.1756	NaN	41.0354	NaN	NaN	NaN	NaN	12.2189	NaN	NaN	NaN	NaN	34.9317	12.4297	36.3625	62.3503	26.059
	57.9106	80.088	NaN	NaN	NaN	NaN	NaN	NaN	NaN	37.4117	8.22826	NaN	NaN	NaN	NaN	29.0212	NaN	NaN	NaN	NaN	NaN	NaN	NaN	10.3316	9.77841	NaN	42.6664	NaN	23.1152	64.4634	NaN	NaN	59.9663	NaN	40.7041	NaN	NaN	NaN	NaN	11.9309	NaN	NaN	NaN	NaN	37.7465	13.8056	37.6953	61.367	26.8918
	58.1575	82.2826	NaN	NaN	NaN	NaN	NaN	NaN	NaN	37.0051	8.77013	NaN	NaN	NaN	NaN	29.3649	NaN	NaN	NaN	NaN	NaN	NaN	NaN	10.6274	10.8222	NaN	47.6221	NaN	22.5971	66.6271	NaN	NaN	61.5694	NaN	43.5757	NaN	NaN	NaN	NaN	12.6783	NaN	NaN	NaN	NaN	40.6358	16.6164	39.8433	63.7424	28.9535
	56.4611	80.9063	NaN	NaN	NaN	NaN	NaN	NaN	NaN	33.6391	8.40562	NaN	NaN	NaN	NaN	27.7999	NaN	NaN	NaN	NaN	NaN	NaN	NaN	10.916	9.72673	NaN	48.3447	NaN	20.5611	66.1295	NaN	NaN	59.5982	NaN	41.4146	NaN	NaN	NaN	NaN	12.62	NaN	NaN	NaN	NaN	39.3868	17.409	39.2535	62.5506	29.4575
	56.7257	80.5272	NaN	NaN	NaN	NaN	NaN	NaN	NaN	32.229	9.38608	NaN	NaN	NaN	NaN	32.7743	NaN	NaN	NaN	NaN	NaN	NaN	NaN	11.7361	11.1075	NaN	52.2058	NaN	21.3	68.6396	NaN	NaN	59.0491	NaN	43.9759	NaN	NaN	NaN	NaN	13.0768	NaN	NaN	NaN	NaN	40.75	19.9784	40.764	64.9813	30.7887
	56.4707	79.4987	NaN	NaN	NaN	NaN	NaN	NaN	NaN	30.8228	8.77074	NaN	NaN	NaN	NaN	29.0016	NaN	NaN	NaN	NaN	NaN	NaN	NaN	12.8198	11.7981	NaN	55.8192	NaN	20.2462	68.0182	NaN	NaN	56.4185	NaN	44.5861	NaN	NaN	NaN	NaN	13.9587	NaN	NaN	NaN	NaN	39.3029	21.8576	39.8266	61.7649	31.7809
	53.7962	78.0677	NaN	NaN	NaN	NaN	NaN	NaN	NaN	30.9947	8.4992	NaN	NaN	NaN	NaN	28.0588	NaN	NaN	NaN	NaN	NaN	NaN	NaN	14.7257	12.3251	NaN	56.9324	NaN	20.7788	67.5121	NaN	NaN	52.5714	NaN	47.4573	NaN	NaN	NaN	NaN	14.2878	NaN	NaN	NaN	NaN	35.2869	22.344	40.3021	57.2769	34.2319
	52.9296	74.8285	NaN	NaN	NaN	NaN	NaN	NaN	NaN	30.524	8.58787	NaN	NaN	NaN	NaN	26.8531	NaN	NaN	NaN	NaN	NaN	NaN	NaN	15.7284	9.09012	NaN	56.295	NaN	19.2045	65.5169	NaN	NaN	48.1347	NaN	47.0669	NaN	NaN	NaN	NaN	14.6492	NaN	NaN	NaN	NaN	35.5279	21.6563	41.1502	56.9289	33.7315
	54.0206	73.5205	NaN	NaN	NaN	NaN	NaN	NaN	NaN	30.8059	2.44152	NaN	NaN	NaN	NaN	27.3225	NaN	NaN	NaN	NaN	NaN	NaN	NaN	20.4279	10.7453	NaN	56.0217	NaN	18.8012	67.2849	NaN	NaN	46.7117	NaN	50.6943	NaN	NaN	NaN	NaN	15.4925	NaN	NaN	NaN	NaN	37.0638	22.7646	43.5151	57.7736	34.8961
	54.2765	71.8859	NaN	NaN	NaN	NaN	NaN	NaN	NaN	30.8693	2.1974	NaN	NaN	NaN	NaN	26.3828	NaN	NaN	NaN	NaN	NaN	NaN	NaN	19.9073	10.6467	NaN	53.0657	NaN	17.4927	65.0452	NaN	NaN	42.7544	NaN	53.022	NaN	NaN	NaN	NaN	15.0255	NaN	NaN	NaN	NaN	35.4297	22.6808	43.9822	57.7252	34.7936
	54.9355	71.8475	NaN	NaN	NaN	NaN	NaN	NaN	NaN	31.5023	3.79602	NaN	NaN	NaN	NaN	27.4762	NaN	NaN	NaN	NaN	NaN	NaN	NaN	22.8075	11.8933	NaN	51.7786	NaN	17.2467	67.0701	NaN	NaN	42.6854	NaN	57.38	NaN	NaN	NaN	NaN	16.152	NaN	NaN	NaN	NaN	38.7717	24.4992	47.5441	59.0926	36.0117
	55.4865	68.0965	NaN	NaN	NaN	NaN	NaN	NaN	NaN	31.3214	2.24847	NaN	NaN	NaN	NaN	27.3336	NaN	NaN	NaN	NaN	NaN	NaN	NaN	20.5339	12.7634	NaN	47.3832	NaN	15.1983	66.3654	NaN	NaN	42.1014	NaN	57.9283	NaN	NaN	NaN	NaN	15.6112	NaN	NaN	NaN	NaN	37.7656	23.6232	47.1397	59.8739	36.1937
	55.4537	67.1239	NaN	NaN	NaN	NaN	NaN	NaN	NaN	32.416	2.74328	NaN	NaN	NaN	NaN	27.6093	NaN	NaN	NaN	NaN	NaN	NaN	NaN	19.6477	13.8825	NaN	46.584	NaN	13.5598	70.009	NaN	NaN	43.3462	NaN	60.794	NaN	NaN	NaN	NaN	16.8244	NaN	NaN	NaN	NaN	39.5707	24.3694	48.0879	61.6518	39.2911
	55.3558	64.7836	NaN	NaN	NaN	NaN	NaN	NaN	NaN	32.6308	2.2489	NaN	NaN	NaN	NaN	23.2048	NaN	NaN	NaN	NaN	NaN	NaN	NaN	15.3298	13.6439	NaN	45.949	NaN	14.014	70.5397	NaN	NaN	42.9654	NaN	57.3106	NaN	NaN	NaN	NaN	16.4722	NaN	NaN	NaN	NaN	37.7077	23.3423	48.0416	60.4078	38.2263
	55.9778	64.0704	NaN	NaN	NaN	NaN	NaN	NaN	NaN	34.9346	2.75138	NaN	NaN	NaN	NaN	26.6371	NaN	NaN	NaN	NaN	NaN	NaN	NaN	15.7818	13.2606	NaN	45.8529	NaN	14.6466	72.6264	NaN	NaN	43.6178	NaN	59.2415	NaN	NaN	NaN	NaN	17.7344	NaN	NaN	NaN	NaN	37.311	23.6005	48.0422	61.789	39.4668
	54.9076	66.877	NaN	NaN	NaN	NaN	NaN	NaN	NaN	35.8463	0.310244	NaN	NaN	NaN	NaN	22.7775	NaN	NaN	NaN	NaN	NaN	NaN	NaN	13.9272	10.4659	NaN	45.304	NaN	14.2371	71.7325	NaN	NaN	42.4546	NaN	56.6376	NaN	NaN	NaN	NaN	17.4845	NaN	NaN	NaN	NaN	34.0649	20.3769	47.5873	60.9478	38.3495
	56.3774	67.4796	NaN	NaN	NaN	NaN	NaN	NaN	NaN	39.7072	1.55694	NaN	NaN	NaN	NaN	22.5489	NaN	NaN	NaN	NaN	NaN	NaN	NaN	14.7826	13.4521	NaN	47.5913	NaN	16.6924	73.0155	NaN	NaN	46.6909	NaN	57.4126	NaN	NaN	NaN	NaN	18.4094	NaN	NaN	NaN	NaN	34.1066	19.918	48.6031	61.8311	38.016
	56.6726	67.2753	NaN	NaN	NaN	NaN	NaN	NaN	NaN	40.0452	0.366391	NaN	NaN	NaN	NaN	21.9914	NaN	NaN	NaN	NaN	NaN	NaN	NaN	14.4464	11.9394	NaN	45.1726	NaN	16.6746	72.4363	NaN	NaN	46.8624	NaN	56.7789	NaN	NaN	NaN	NaN	18.0091	NaN	NaN	NaN	NaN	29.7741	17.9678	49.193	63.0012	33.5693
	58.7879	69.9427	NaN	NaN	NaN	NaN	NaN	NaN	NaN	42.9927	2.31514	NaN	NaN	NaN	NaN	21.7647	NaN	NaN	NaN	NaN	NaN	NaN	NaN	15.937	13.3514	NaN	47.744	NaN	15.998	72.9191	NaN	NaN	49.5079	NaN	57.8197	NaN	NaN	NaN	NaN	20.1946	NaN	NaN	NaN	NaN	31.7848	17.2833	51.9604	64.0809	33.6575
	58.5223	68.9951	NaN	NaN	NaN	NaN	NaN	NaN	NaN	42.035	1.66776	NaN	NaN	NaN	NaN	21.8989	NaN	NaN	NaN	NaN	NaN	NaN	NaN	14.6749	12.591	NaN	47.7616	NaN	16.5532	73.9936	NaN	NaN	51.7047	NaN	55.1147	NaN	NaN	NaN	NaN	18.5966	NaN	NaN	NaN	NaN	30.4562	15.2218	53.4497	66.1768	30.1371
	61.5754	69.8617	NaN	NaN	NaN	NaN	NaN	NaN	NaN	45.2133	5.1769	NaN	NaN	NaN	NaN	24.2612	NaN	NaN	NaN	NaN	NaN	NaN	NaN	15.6271	11.959	NaN	48.2047	NaN	17.3287	75.5253	NaN	NaN	54.9955	NaN	55.3053	NaN	NaN	NaN	NaN	20.801	NaN	NaN	NaN	NaN	32.7513	14.6796	56.4735	69.7787	30.0479
	62.0289	69.737	NaN	NaN	NaN	NaN	NaN	NaN	NaN	44.4787	5.30368	NaN	NaN	NaN	NaN	23.0458	NaN	NaN	NaN	NaN	NaN	NaN	NaN	14.442	15.5849	NaN	47.5895	NaN	17.2143	76.0541	NaN	NaN	55.6575	NaN	51.082	NaN	NaN	NaN	NaN	19.2137	NaN	NaN	NaN	NaN	31.5716	12.7321	57.2202	69.5186	26.5649
	63.4859	71.7127	NaN	NaN	NaN	NaN	NaN	NaN	NaN	45.5634	8.70694	NaN	NaN	NaN	NaN	21.878	NaN	NaN	NaN	NaN	NaN	NaN	NaN	17.801	17.4165	NaN	49.2652	NaN	18.3765	77.4375	NaN	NaN	59.7479	NaN	51.4427	NaN	NaN	NaN	NaN	21.3405	NaN	NaN	NaN	NaN	31.0905	14.02	61.1644	74.1714	28.8136
	63.7964	73.4117	NaN	NaN	NaN	NaN	NaN	NaN	NaN	44.7418	9.45107	NaN	NaN	NaN	NaN	25.8142	NaN	NaN	NaN	NaN	NaN	NaN	NaN	16.4701	14.574	NaN	50.1814	NaN	18.0488	77.8448	NaN	NaN	59.2552	NaN	46.4603	NaN	NaN	NaN	NaN	20.2684	NaN	NaN	NaN	NaN	28.053	12.5007	61.8509	70.7918	31.8973
	63.422	73.8862	NaN	NaN	NaN	NaN	NaN	NaN	NaN	45.8128	11.4215	NaN	NaN	NaN	NaN	28.9902	NaN	NaN	NaN	NaN	NaN	NaN	NaN	19.6709	14.0299	NaN	50.469	NaN	18.9622	80.1668	NaN	NaN	63.3357	NaN	44.9096	NaN	NaN	NaN	NaN	21.6258	NaN	NaN	NaN	NaN	26.7019	13.7722	64.4015	67.9778	22.6397
	63.3896	73.7577	NaN	NaN	NaN	NaN	NaN	NaN	NaN	44.9609	11.2545	NaN	NaN	NaN	NaN	27.8712	NaN	NaN	NaN	NaN	NaN	NaN	NaN	20.839	12.8197	NaN	49.6265	NaN	19.7932	80.1657	NaN	NaN	62.6704	NaN	53.1937	NaN	NaN	NaN	NaN	20.7019	NaN	NaN	NaN	NaN	26.085	11.5193	64.9252	75.1174	19.8126
	63.3573	73.1878	NaN	NaN	NaN	NaN	NaN	NaN	NaN	46.3686	11.4802	NaN	NaN	NaN	NaN	29.1856	NaN	NaN	NaN	NaN	NaN	NaN	NaN	25.1321	12.9768	NaN	48.7256	NaN	22.1326	80.9933	NaN	NaN	62.79	NaN	35.7787	NaN	NaN	NaN	NaN	21.8449	NaN	NaN	NaN	NaN	26.5486	10.2595	68.8433	77.3004	19.2202
	63.4866	70.4939	NaN	NaN	NaN	NaN	NaN	NaN	NaN	44.2108	10.7143	NaN	NaN	NaN	NaN	29.0074	NaN	NaN	NaN	NaN	NaN	NaN	NaN	24.8584	12.2891	NaN	47.8281	NaN	21.4949	78.454	NaN	NaN	62.131	NaN	48.9515	NaN	NaN	NaN	NaN	20.6923	NaN	NaN	NaN	NaN	25.8161	9.8715	69.2758	76.4061	16.2854
	63.8714	68.7076	NaN	NaN	NaN	NaN	NaN	NaN	NaN	44.0824	10.932	NaN	NaN	NaN	NaN	29.6068	NaN	NaN	NaN	NaN	NaN	NaN	NaN	29.1577	12.1059	NaN	47.5711	NaN	23.0258	82.1097	NaN	NaN	60.8774	NaN	25.754	NaN	NaN	NaN	NaN	20.9591	NaN	NaN	NaN	NaN	28.3082	9.99879	74.0316	78.5573	16.4143
	63.3577	73.822	NaN	NaN	NaN	NaN	NaN	NaN	NaN	41.1852	10.1677	NaN	NaN	NaN	NaN	29.5619	NaN	NaN	NaN	NaN	NaN	NaN	NaN	28.6645	11.9821	NaN	45.7978	NaN	21.2064	82.4806	NaN	NaN	59.3278	NaN	21.7805	NaN	NaN	NaN	NaN	20.3684	NaN	NaN	NaN	NaN	25.482	9.36241	74.6497	76.0772	16.1802
	64.4905	58.9112	NaN	NaN	NaN	NaN	NaN	NaN	NaN	40.504	10.2407	NaN	NaN	NaN	NaN	32.7219	NaN	NaN	NaN	NaN	NaN	NaN	NaN	30.598	12.9	NaN	46.1387	NaN	22.4876	85.0592	NaN	NaN	57.7876	NaN	20.6489	NaN	NaN	NaN	NaN	21.1713	NaN	NaN	NaN	NaN	26.3996	10.7239	78.323	77.1585	17.2208
	63.9204	54.779	NaN	NaN	NaN	NaN	NaN	NaN	NaN	37.3631	9.82639	NaN	NaN	NaN	NaN	31.1382	NaN	NaN	NaN	NaN	NaN	NaN	NaN	31.2274	12.2271	NaN	46.376	NaN	21.308	86.5691	NaN	NaN	55.1876	NaN	16.6315	NaN	NaN	NaN	NaN	21.2704	NaN	NaN	NaN	NaN	26.0951	10.5984	78.3239	75.9891	15.6805
	64.3704	53.861	NaN	NaN	NaN	NaN	NaN	NaN	NaN	37.4645	10.2037	NaN	NaN	NaN	NaN	34.025	NaN	NaN	NaN	NaN	NaN	NaN	NaN	34.2344	15.2315	NaN	48.2286	NaN	21.7128	87.0812	NaN	NaN	54.9073	NaN	16.9602	NaN	NaN	NaN	NaN	23.0319	NaN	NaN	NaN	NaN	26.5514	11.5746	81.1999	76.5783	19.6178
	64.0815	50.4143	NaN	NaN	NaN	NaN	NaN	NaN	NaN	34.0535	9.42615	NaN	NaN	NaN	NaN	30.0765	NaN	NaN	NaN	NaN	NaN	NaN	NaN	35.1714	14.8238	NaN	49.4008	NaN	21.0239	86.6458	NaN	NaN	52.086	NaN	15.5479	NaN	NaN	NaN	NaN	22.0956	NaN	NaN	NaN	NaN	27.3634	12.8162	80.9366	77.3172	18.7345
	64.0757	49.6378	NaN	NaN	NaN	NaN	NaN	NaN	NaN	33.2965	9.60199	NaN	NaN	NaN	NaN	30.964	NaN	NaN	NaN	NaN	NaN	NaN	NaN	29.6313	16.4003	NaN	51.7098	NaN	22.2584	85.4498	NaN	NaN	51.5869	NaN	15.9101	NaN	NaN	NaN	NaN	24.2957	NaN	NaN	NaN	NaN	28.2096	14.9997	84.711	70.5338	20.4808
	65.9609	50.4271	NaN	NaN	NaN	NaN	NaN	NaN	NaN	31.7909	8.76209	NaN	NaN	NaN	NaN	29.9253	NaN	NaN	NaN	NaN	NaN	NaN	NaN	41.0822	17.146	NaN	52.6454	NaN	21.0558	83.4109	NaN	NaN	50.7503	NaN	14.7047	NaN	NaN	NaN	NaN	24.491	NaN	NaN	NaN	NaN	29.8981	16.4496	88.1538	68.4471	20.5292
	65.8903	51.5841	NaN	NaN	NaN	NaN	NaN	NaN	NaN	30.8352	6.87259	NaN	NaN	NaN	NaN	32.5816	NaN	NaN	NaN	NaN	NaN	NaN	NaN	44.1151	18.5491	NaN	53.1774	NaN	16.6471	86.8252	NaN	NaN	49.1378	NaN	15.4991	NaN	NaN	NaN	NaN	25.4611	NaN	NaN	NaN	NaN	30.7271	16.9803	89.8327	76.2837	20.2204
	65.6118	48.506	NaN	NaN	NaN	NaN	NaN	NaN	NaN	27.62	6.04603	NaN	NaN	NaN	NaN	20.3881	NaN	NaN	NaN	NaN	NaN	NaN	NaN	44.6509	15.3605	NaN	52.3208	NaN	15.5196	75.7306	NaN	NaN	47.8906	NaN	15.4339	NaN	NaN	NaN	NaN	25.2448	NaN	NaN	NaN	NaN	29.8448	17.2225	92.1108	61.2983	21.6453
	67.8854	49.391	NaN	NaN	NaN	NaN	NaN	NaN	NaN	25.4966	8.5545	NaN	NaN	NaN	NaN	21.2813	NaN	NaN	NaN	NaN	NaN	NaN	NaN	48.8494	13.8634	NaN	52.6675	NaN	17.1385	75.6708	NaN	NaN	47.6471	NaN	17.4675	NaN	NaN	NaN	NaN	25.0027	NaN	NaN	NaN	NaN	32.9738	19.3006	94.7418	61.9785	19.6077
	67.0206	50.0324	NaN	NaN	NaN	NaN	NaN	NaN	NaN	23.7302	7.58614	NaN	NaN	NaN	NaN	24.7867	NaN	NaN	NaN	NaN	NaN	NaN	NaN	50.3988	13.0913	NaN	51.9114	NaN	16.0065	73.4715	NaN	NaN	47.6164	NaN	16.7336	NaN	NaN	NaN	NaN	22.292	NaN	NaN	NaN	NaN	31.4824	21.8386	94.5035	63.0671	35.6983
	68.8762	43.5087	NaN	NaN	NaN	NaN	NaN	NaN	NaN	23.712	9.43739	NaN	NaN	NaN	NaN	29.2071	NaN	NaN	NaN	NaN	NaN	NaN	NaN	53.4341	13.5375	NaN	52.8163	NaN	16.0808	76.1425	NaN	NaN	48.3944	NaN	17.3252	NaN	NaN	NaN	NaN	21.6328	NaN	NaN	NaN	NaN	31.5619	22.0444	97.2675	66.5819	39.9281
	66.9873	43.3381	NaN	NaN	NaN	NaN	NaN	NaN	NaN	22.2203	7.47979	NaN	NaN	NaN	NaN	27.917	NaN	NaN	NaN	NaN	NaN	NaN	NaN	54.6971	13.1298	NaN	51.5738	NaN	15.2855	74.1076	NaN	NaN	47.5454	NaN	17.6279	NaN	NaN	NaN	NaN	20.1105	NaN	NaN	NaN	NaN	27.9284	22.1344	97.0291	66.2425	40.4889
	66.8528	44.0944	NaN	NaN	NaN	NaN	NaN	NaN	NaN	23.0777	8.38496	NaN	NaN	NaN	NaN	20.8347	NaN	NaN	NaN	NaN	NaN	NaN	NaN	58.6243	14.1483	NaN	52.44	NaN	18.1468	76.7442	NaN	NaN	48.9139	NaN	18.009	NaN	NaN	NaN	NaN	20.4621	NaN	NaN	NaN	NaN	27.4811	22.444	98.0693	69.0399	42.9112
	64.1346	43.5978	NaN	NaN	NaN	NaN	NaN	NaN	NaN	22.0042	7.53838	NaN	NaN	NaN	NaN	23.034	NaN	NaN	NaN	NaN	NaN	NaN	NaN	60.9061	14.3583	NaN	49.6044	NaN	19.356	75.413	NaN	NaN	48.0246	NaN	16.9231	NaN	NaN	NaN	NaN	19.2609	NaN	NaN	NaN	NaN	27.0934	20.1087	99.6848	69.9195	45.068
	62.9173	44.841	NaN	NaN	NaN	NaN	NaN	NaN	NaN	23.4693	8.29115	NaN	NaN	NaN	NaN	31.3275	NaN	NaN	NaN	NaN	NaN	NaN	NaN	65.1015	17.2588	NaN	49.8639	NaN	24.1442	77.6486	NaN	NaN	48.4229	NaN	17.557	NaN	NaN	NaN	NaN	19.1361	NaN	NaN	NaN	NaN	26.5411	20.6361	103.661	73.5545	46.7442
	61.4058	46.4308	NaN	NaN	NaN	NaN	NaN	NaN	NaN	22.8351	6.67892	NaN	NaN	NaN	NaN	29.9966	NaN	NaN	NaN	NaN	NaN	NaN	NaN	62.7664	17.4097	NaN	52.195	NaN	22.9129	76.3029	NaN	NaN	49.2041	NaN	15.0137	NaN	NaN	NaN	NaN	17.3916	NaN	NaN	NaN	NaN	26.1561	15.9732	106.434	74.1061	48.5237
	61.1042	48.79	NaN	NaN	NaN	NaN	NaN	NaN	NaN	23.8768	9.51984	NaN	NaN	NaN	NaN	24.3759	NaN	NaN	NaN	NaN	NaN	NaN	NaN	64.2624	19.5747	NaN	44.139	NaN	24.8155	78.5393	NaN	NaN	53.4344	NaN	15.0371	NaN	NaN	NaN	NaN	17.1111	NaN	NaN	NaN	NaN	29.3409	15.752	111.05	75.3501	51.1679
	58.2206	50.19	NaN	NaN	NaN	NaN	NaN	NaN	NaN	25.33	8.6325	NaN	NaN	NaN	NaN	44.011	NaN	NaN	NaN	NaN	NaN	NaN	NaN	62.2667	18.0706	NaN	39.413	NaN	23.7851	80.0782	NaN	NaN	54.0849	NaN	12.8058	NaN	NaN	NaN	NaN	14.7425	NaN	NaN	NaN	NaN	31.3449	13.6699	112.578	76.4535	43.9896
	57.3596	52.044	NaN	NaN	NaN	NaN	NaN	NaN	NaN	26.6227	10.4865	NaN	NaN	NaN	NaN	45.8984	NaN	NaN	NaN	NaN	NaN	NaN	NaN	64.6326	18.6414	NaN	37.7095	NaN	23.8467	83.6567	NaN	NaN	56.8263	NaN	13.0445	NaN	NaN	NaN	NaN	13.998	NaN	NaN	NaN	NaN	30.6969	13.6701	116.901	71.737	42.1219
	56.4964	53.1794	NaN	NaN	NaN	NaN	NaN	NaN	NaN	25.7176	10.6694	NaN	NaN	NaN	NaN	44.5869	NaN	NaN	NaN	NaN	NaN	NaN	NaN	63.9339	18.3868	NaN	35.9728	NaN	20.551	83.2196	NaN	NaN	57.7823	NaN	10.442	NaN	NaN	NaN	NaN	12.3764	NaN	NaN	NaN	NaN	29.775	11.9463	117.703	82.6966	40.4571
	58.0826	56.0008	NaN	NaN	NaN	NaN	NaN	NaN	NaN	27.4825	14.2135	NaN	NaN	NaN	NaN	46.9735	NaN	NaN	NaN	NaN	NaN	NaN	NaN	61.5931	20.7173	NaN	36.3961	NaN	22.5897	77.4211	NaN	NaN	61.7763	NaN	9.91895	NaN	NaN	NaN	NaN	13.5068	NaN	NaN	NaN	NaN	30.5928	12.4357	120.296	74.7281	41.0913
	57.098	57.6018	NaN	NaN	NaN	NaN	NaN	NaN	NaN	28.9249	13.5136	NaN	NaN	NaN	NaN	45.7421	NaN	NaN	NaN	NaN	NaN	NaN	NaN	61.5071	20.8612	NaN	36.1539	NaN	21.6126	87.476	NaN	NaN	59.9191	NaN	9.63273	NaN	NaN	NaN	NaN	12.2675	NaN	NaN	NaN	NaN	30.6603	10.443	120.021	88.4617	47.5787
	57.1329	62.128	NaN	NaN	NaN	NaN	NaN	NaN	NaN	31.2612	16.2564	NaN	NaN	NaN	NaN	46.1534	NaN	NaN	NaN	NaN	NaN	NaN	NaN	62.8424	21.6604	NaN	37.7445	NaN	24.5641	87.404	NaN	NaN	63.9838	NaN	9.67558	NaN	NaN	NaN	NaN	12.2251	NaN	NaN	NaN	NaN	31.4627	10.1654	123.153	89.9083	43.0557
	57.0864	64.515	NaN	NaN	NaN	NaN	NaN	NaN	NaN	33.1896	15.8807	NaN	NaN	NaN	NaN	43.5381	NaN	NaN	NaN	NaN	NaN	NaN	NaN	61.9569	21.4896	NaN	36.5214	NaN	24.4498	84.067	NaN	NaN	62.1352	NaN	10.1729	NaN	NaN	NaN	NaN	11.8233	NaN	NaN	NaN	NaN	30.5474	8.70557	125.504	90.0405	37.0121
	57.7266	69.2331	NaN	NaN	NaN	NaN	NaN	NaN	NaN	37.9028	17.2272	NaN	NaN	NaN	NaN	41.5884	NaN	NaN	NaN	NaN	NaN	NaN	NaN	64.657	23.6808	NaN	37.6259	NaN	26.3322	82.8302	NaN	NaN	65.954	NaN	11.3596	NaN	NaN	NaN	NaN	11.6499	NaN	NaN	NaN	NaN	32.3193	7.99522	127.719	90.3798	40.7742
	58.2654	71.4583	NaN	NaN	NaN	NaN	NaN	NaN	NaN	39.173	16.1358	NaN	NaN	NaN	NaN	46.3578	NaN	NaN	NaN	NaN	NaN	NaN	NaN	62.1901	19.364	NaN	37.1464	NaN	25.9722	78.9728	NaN	NaN	65.1624	NaN	13.0922	NaN	NaN	NaN	NaN	11.1788	NaN	NaN	NaN	NaN	32.9436	5.76391	130.676	90.6228	49.7673
	60.785	75.4973	NaN	NaN	NaN	NaN	NaN	NaN	NaN	44.0401	17.6368	NaN	NaN	NaN	NaN	30.646	NaN	NaN	NaN	NaN	NaN	NaN	NaN	65.1057	19.3311	NaN	39.3106	NaN	26.408	78.2306	NaN	NaN	65.8148	NaN	15.8192	NaN	NaN	NaN	NaN	11.3031	NaN	NaN	NaN	NaN	34.418	4.94745	133.026	92.601	49.4222
	61.4376	76.1995	NaN	NaN	NaN	NaN	NaN	NaN	NaN	44.7484	16.6734	NaN	NaN	NaN	NaN	44.8458	NaN	NaN	NaN	NaN	NaN	NaN	NaN	64.0492	16.9538	NaN	39.0505	NaN	26.0931	76.5482	NaN	NaN	67.7407	NaN	16.4179	NaN	NaN	NaN	NaN	12.1482	NaN	NaN	NaN	NaN	34.0009	2.54428	133.755	92.9528	40.0339
	66.316	78.6357	NaN	NaN	NaN	NaN	NaN	NaN	NaN	48.2654	16.8605	NaN	NaN	NaN	NaN	25.0791	NaN	NaN	NaN	NaN	NaN	NaN	NaN	64.1918	16.9578	NaN	40.7072	NaN	27.6017	76.8846	NaN	NaN	68.9528	NaN	17.9727	NaN	NaN	NaN	NaN	13.1761	NaN	NaN	NaN	NaN	36.3885	3.48764	137.664	94.4825	43.8787
	64.3731	78.2097	NaN	NaN	NaN	NaN	NaN	NaN	NaN	47.6226	16.4626	NaN	NaN	NaN	NaN	43.9731	NaN	NaN	NaN	NaN	NaN	NaN	NaN	59.4176	16.1861	NaN	40.5523	NaN	24.7685	76.3894	NaN	NaN	68.3563	NaN	18.4095	NaN	NaN	NaN	NaN	13.0962	NaN	NaN	NaN	NaN	35.9163	2.79982	134.95	94.4258	44.7511
	66.0223	78.1181	NaN	NaN	NaN	NaN	NaN	NaN	NaN	50.8383	16.4471	NaN	NaN	NaN	NaN	18.7756	NaN	NaN	NaN	NaN	NaN	NaN	NaN	58.8868	16.6094	NaN	40.9903	NaN	24.7109	78.4565	NaN	NaN	70.1588	NaN	19.26	NaN	NaN	NaN	NaN	12.9545	NaN	NaN	NaN	NaN	36.2154	2.9699	138.239	94.0751	49.5948
	65.4622	73.2846	NaN	NaN	NaN	NaN	NaN	NaN	NaN	49.2187	16.2188	NaN	NaN	NaN	NaN	15.1989	NaN	NaN	NaN	NaN	NaN	NaN	NaN	55.7705	15.3363	NaN	42.4822	NaN	23.8354	78.8325	NaN	NaN	68.7059	NaN	18.8917	NaN	NaN	NaN	NaN	12.9168	NaN	NaN	NaN	NaN	35.9569	2.51882	138.025	92.3442	48.844
	66.0928	72.4594	NaN	NaN	NaN	NaN	NaN	NaN	NaN	52.1022	16.1837	NaN	NaN	NaN	NaN	14.3662	NaN	NaN	NaN	NaN	NaN	NaN	NaN	54.7794	15.7095	NaN	43.6209	NaN	24.7481	80.7824	NaN	NaN	68.5896	NaN	19.2956	NaN	NaN	NaN	NaN	12.9848	NaN	NaN	NaN	NaN	36.433	3.65306	140.655	91.5087	51.5042
	65.2814	70.9204	NaN	NaN	NaN	NaN	NaN	NaN	NaN	52.8326	15.5683	NaN	NaN	NaN	NaN	14.3595	NaN	NaN	NaN	NaN	NaN	NaN	NaN	52.7463	15.0482	NaN	43.2975	NaN	24.9031	80.5236	NaN	NaN	67.4453	NaN	19.1647	NaN	NaN	NaN	NaN	10.8664	NaN	NaN	NaN	NaN	36.8401	3.94943	140.986	87.8233	51.0219
	67.0734	71.2742	NaN	NaN	NaN	NaN	NaN	NaN	NaN	53.6984	16.219	NaN	NaN	NaN	NaN	14.1671	NaN	NaN	NaN	NaN	NaN	NaN	NaN	53.0993	16.1298	NaN	43.8962	NaN	25.9379	80.4881	NaN	NaN	67.7647	NaN	20.7781	NaN	NaN	NaN	NaN	10.1058	NaN	NaN	NaN	NaN	38.4383	5.27008	141.928	86.1256	52.3604
	67.848	69.8338	NaN	NaN	NaN	NaN	NaN	NaN	NaN	53.5342	15.1781	NaN	NaN	NaN	NaN	14.4639	NaN	NaN	NaN	NaN	NaN	NaN	NaN	53.4325	14.53	NaN	44.1771	NaN	22.3255	83.0942	NaN	NaN	64.6945	NaN	22.6	NaN	NaN	NaN	NaN	9.69995	NaN	NaN	NaN	NaN	39.4437	7.761	144.258	83.9829	52.8305
	69.5655	66.6678	NaN	NaN	NaN	NaN	NaN	NaN	NaN	53.5378	14.3491	NaN	NaN	NaN	NaN	16.0854	NaN	NaN	NaN	NaN	NaN	NaN	NaN	55.275	14.0536	NaN	41.7588	NaN	24.2918	87.5362	NaN	NaN	63.2058	NaN	22.5789	NaN	NaN	NaN	NaN	7.47031	NaN	NaN	NaN	NaN	41.9462	10.4965	146.247	83.8045	54.9052
	67.7887	71.6899	NaN	NaN	NaN	NaN	NaN	NaN	NaN	50.3268	13.5014	NaN	NaN	NaN	NaN	17.4844	NaN	NaN	NaN	NaN	NaN	NaN	NaN	45.9865	10.9453	NaN	41.9761	NaN	12.6033	87.3885	NaN	NaN	62.0119	NaN	19.9389	NaN	NaN	NaN	NaN	6.68897	NaN	NaN	NaN	NaN	40.8793	8.50558	143.76	81.9895	52.7906
	68.701	59.4954	NaN	NaN	NaN	NaN	NaN	NaN	NaN	50.4003	12.1087	NaN	NaN	NaN	NaN	14.2633	NaN	NaN	NaN	NaN	NaN	NaN	NaN	46.9379	10.4954	NaN	42.6079	NaN	14.8334	92.3811	NaN	NaN	60.755	NaN	19.6075	NaN	NaN	NaN	NaN	7.11908	NaN	NaN	NaN	NaN	41.7359	9.46978	145.622	84.1471	55.9384
	66.9383	70.554	NaN	NaN	NaN	NaN	NaN	NaN	NaN	45.4633	11.2733	NaN	NaN	NaN	NaN	25.4176	NaN	NaN	NaN	NaN	NaN	NaN	NaN	49.2034	11.1799	NaN	43.1796	NaN	15.7654	92.7161	NaN	NaN	59.9348	NaN	21.689	NaN	NaN	NaN	NaN	7.2505	NaN	NaN	NaN	NaN	40.5384	9.59569	141.06	80.8738	52.5955
	66.558	50.7646	NaN	NaN	NaN	NaN	NaN	NaN	NaN	45.2775	11.6622	NaN	NaN	NaN	NaN	30.048	NaN	NaN	NaN	NaN	NaN	NaN	NaN	50.644	13.308	NaN	43.1877	NaN	19.388	97.3346	NaN	NaN	61.1949	NaN	12.766	NaN	NaN	NaN	NaN	8.82278	NaN	NaN	NaN	NaN	41.83	10.2002	145.866	82.9703	49.1729
	63.365	47.5302	NaN	NaN	NaN	NaN	NaN	NaN	NaN	42.8643	10.7942	NaN	NaN	NaN	NaN	29.8516	NaN	NaN	NaN	NaN	NaN	NaN	NaN	49.5457	14.5063	NaN	41.8204	NaN	18.8564	96.8855	NaN	NaN	60.1847	NaN	21.2589	NaN	NaN	NaN	NaN	8.65845	NaN	NaN	NaN	NaN	40.1871	9.8043	143.718	81.3173	46.4595
	63.5411	47.3131	NaN	NaN	NaN	NaN	NaN	NaN	NaN	43.1289	10.1128	NaN	NaN	NaN	NaN	34.4231	NaN	NaN	NaN	NaN	NaN	NaN	NaN	50.408	16.8202	NaN	41.8899	NaN	21.2158	99.0866	NaN	NaN	60.1639	NaN	6.42497	NaN	NaN	NaN	NaN	8.93827	NaN	NaN	NaN	NaN	44.0565	10.1375	145.928	82.1254	46.2322
	61.3197	43.3482	NaN	NaN	NaN	NaN	NaN	NaN	NaN	41.4486	9.02385	NaN	NaN	NaN	NaN	34.9563	NaN	NaN	NaN	NaN	NaN	NaN	NaN	48.9979	16.5147	NaN	40.4989	NaN	20.3984	98.2373	NaN	NaN	59.9767	NaN	2.87609	NaN	NaN	NaN	NaN	8.32567	NaN	NaN	NaN	NaN	43.4261	7.36762	146.707	81.2436	43.7271
	62.3188	43.6532	NaN	NaN	NaN	NaN	NaN	NaN	NaN	41.7665	10.3737	NaN	NaN	NaN	NaN	38.0285	NaN	NaN	NaN	NaN	NaN	NaN	NaN	49.7319	17.8872	NaN	40.2543	NaN	21.8066	98.5102	NaN	NaN	61.8165	NaN	3.04166	NaN	NaN	NaN	NaN	8.06381	NaN	NaN	NaN	NaN	44.0032	6.81522	147.368	82.8106	43.2538
	61.1751	40.8412	NaN	NaN	NaN	NaN	NaN	NaN	NaN	38.4154	7.51288	NaN	NaN	NaN	NaN	38.5032	NaN	NaN	NaN	NaN	NaN	NaN	NaN	47.344	16.7743	NaN	39.566	NaN	21.094	99.5572	NaN	NaN	62.4717	NaN	1.88472	NaN	NaN	NaN	NaN	7.64217	NaN	NaN	NaN	NaN	44.4204	4.63728	144.216	81.3683	42.2145
	63.2779	39.8397	NaN	NaN	NaN	NaN	NaN	NaN	NaN	38.503	9.0714	NaN	NaN	NaN	NaN	32.1374	NaN	NaN	NaN	NaN	NaN	NaN	NaN	47.7552	16.4582	NaN	40.1062	NaN	23.106	100.701	NaN	NaN	66.155	NaN	1.45514	NaN	NaN	NaN	NaN	7.9819	NaN	NaN	NaN	NaN	46.9493	4.667	146.925	81.9477	44.5593
	63.2358	38.1305	NaN	NaN	NaN	NaN	NaN	NaN	NaN	38.9889	7.60412	NaN	NaN	NaN	NaN	42.8579	NaN	NaN	NaN	NaN	NaN	NaN	NaN	46.7107	11.7842	NaN	40.3539	NaN	22.4945	100.447	NaN	NaN	65.6114	NaN	0.545977	NaN	NaN	NaN	NaN	6.95738	NaN	NaN	NaN	NaN	44.5605	2.53271	146.318	79.6178	43.304
	63.2755	38.5067	NaN	NaN	NaN	NaN	NaN	NaN	NaN	39.6355	8.11143	NaN	NaN	NaN	NaN	45.7512	NaN	NaN	NaN	NaN	NaN	NaN	NaN	43.9259	16.0154	NaN	42.0245	NaN	23.4985	100.691	NaN	NaN	69.6901	NaN	1.54618	NaN	NaN	NaN	NaN	7.64989	NaN	NaN	NaN	NaN	44.9139	3.7322	147.037	81.6004	46.5501
	63.1998	39.0214	NaN	NaN	NaN	NaN	NaN	NaN	NaN	39.6851	8.15483	NaN	NaN	NaN	NaN	44.6519	NaN	NaN	NaN	NaN	NaN	NaN	NaN	41.7823	17.3308	NaN	42.1571	NaN	22.085	99.1739	NaN	NaN	70.4678	NaN	2.33533	NaN	NaN	NaN	NaN	6.48116	NaN	NaN	NaN	NaN	40.7202	2.46165	142.459	78.3227	44.2108
	63.2705	41.7777	NaN	NaN	NaN	NaN	NaN	NaN	NaN	41.9465	9.54471	NaN	NaN	NaN	NaN	46.5809	NaN	NaN	NaN	NaN	NaN	NaN	NaN	42.9868	16.6163	NaN	43.7919	NaN	24.0027	98.3496	NaN	NaN	73.1101	NaN	3.30797	NaN	NaN	NaN	NaN	7.40263	NaN	NaN	NaN	NaN	40.6116	2.79472	142.321	79.7898	47.654
	63.3258	43.6166	NaN	NaN	NaN	NaN	NaN	NaN	NaN	41.8174	9.56821	NaN	NaN	NaN	NaN	43.8973	NaN	NaN	NaN	NaN	NaN	NaN	NaN	41.8873	10.9206	NaN	44.3403	NaN	23.6213	100.574	NaN	NaN	75.4103	NaN	2.35833	NaN	NaN	NaN	NaN	6.10628	NaN	NaN	NaN	NaN	45.7549	2.37803	142.536	77.5435	47.5695
	63.6122	38.3186	NaN	NaN	NaN	NaN	NaN	NaN	NaN	45.6698	11.6531	NaN	NaN	NaN	NaN	42.5588	NaN	NaN	NaN	NaN	NaN	NaN	NaN	43.8538	11.3924	NaN	46.6322	NaN	26.952	89.1015	NaN	NaN	77.6964	NaN	5.79896	NaN	NaN	NaN	NaN	5.56428	NaN	NaN	NaN	NaN	33.8885	3.27139	144.418	79.4331	49.3289
	63.9731	51.0129	NaN	NaN	NaN	NaN	NaN	NaN	NaN	44.5476	14.5638	NaN	NaN	NaN	NaN	40.9637	NaN	NaN	NaN	NaN	NaN	NaN	NaN	43.5435	10.4078	NaN	46.4126	NaN	24.7526	99.9327	NaN	NaN	82.2661	NaN	6.41487	NaN	NaN	NaN	NaN	3.99132	NaN	NaN	NaN	NaN	30.0049	1.74899	144.825	80.5318	50.2091
	65.2048	40.3995	NaN	NaN	NaN	NaN	NaN	NaN	NaN	49.0797	16.8707	NaN	NaN	NaN	NaN	40.8886	NaN	NaN	NaN	NaN	NaN	NaN	NaN	45.9301	10.2274	NaN	47.4418	NaN	26.1608	81.2668	NaN	NaN	84.5541	NaN	9.93219	NaN	NaN	NaN	NaN	4.19944	NaN	NaN	NaN	NaN	31.4664	4.05719	147.699	82.0808	54.2028
	63.979	56.4155	NaN	NaN	NaN	NaN	NaN	NaN	NaN	50.2275	16.1573	NaN	NaN	NaN	NaN	40.5933	NaN	NaN	NaN	NaN	NaN	NaN	NaN	46.3413	9.30582	NaN	47.9178	NaN	24.6883	77.637	NaN	NaN	87.8051	NaN	9.0033	NaN	NaN	NaN	NaN	4.68142	NaN	NaN	NaN	NaN	30.0931	3.57282	147.653	82.9152	55.9895
	64.1665	59.7023	NaN	NaN	NaN	NaN	NaN	NaN	NaN	49.5146	17.3556	NaN	NaN	NaN	NaN	42.3989	NaN	NaN	NaN	NaN	NaN	NaN	NaN	48.7722	9.16323	NaN	48.3274	NaN	25.2258	78.8549	NaN	NaN	76.5534	NaN	12.497	NaN	NaN	NaN	NaN	6.10278	NaN	NaN	NaN	NaN	30.9421	3.37594	151.205	84.5032	59.389
	64.225	59.9631	NaN	NaN	NaN	NaN	NaN	NaN	NaN	50.8869	14.2986	NaN	NaN	NaN	NaN	42.234	NaN	NaN	NaN	NaN	NaN	NaN	NaN	50.948	9.31467	NaN	49.5656	NaN	24.144	76.6689	NaN	NaN	93.213	NaN	13.1013	NaN	NaN	NaN	NaN	7.45312	NaN	NaN	NaN	NaN	30.1296	3.12533	149.625	84.8576	60.6491
	65.2289	64.1089	NaN	NaN	NaN	NaN	NaN	NaN	NaN	52.1786	16.6642	NaN	NaN	NaN	NaN	43.2653	NaN	NaN	NaN	NaN	NaN	NaN	NaN	52.7497	12.1669	NaN	51.6259	NaN	26.9477	80.0124	NaN	NaN	83.4101	NaN	15.0897	NaN	NaN	NaN	NaN	8.59218	NaN	NaN	NaN	NaN	30.5491	3.46796	151.793	85.5994	63.4495
	64.5595	64.0151	NaN	NaN	NaN	NaN	NaN	NaN	NaN	52.766	14.2123	NaN	NaN	NaN	NaN	43.6658	NaN	NaN	NaN	NaN	NaN	NaN	NaN	55.7451	12.6158	NaN	50.7119	NaN	27.8971	77.7112	NaN	NaN	96.1351	NaN	15.3158	NaN	NaN	NaN	NaN	8.89039	NaN	NaN	NaN	NaN	29.3066	3.19647	151.473	83.2574	63.4247
	64.3102	64.0648	NaN	NaN	NaN	NaN	NaN	NaN	NaN	55.2243	15.8061	NaN	NaN	NaN	NaN	44.232	NaN	NaN	NaN	NaN	NaN	NaN	NaN	58.5673	16.5778	NaN	50.9671	NaN	29.2597	81.5737	NaN	NaN	99.2659	NaN	17.4332	NaN	NaN	NaN	NaN	11.3209	NaN	NaN	NaN	NaN	30.5661	3.61219	154.962	83.5217	66.7018
	63.3468	60.018	NaN	NaN	NaN	NaN	NaN	NaN	NaN	54.4991	13.0975	NaN	NaN	NaN	NaN	45.1712	NaN	NaN	NaN	NaN	NaN	NaN	NaN	59.2821	15.3929	NaN	48.9448	NaN	26.8766	79.7186	NaN	NaN	100.294	NaN	18.7224	NaN	NaN	NaN	NaN	11.5708	NaN	NaN	NaN	NaN	31.6749	2.68265	155.399	82.8521	68.0866
	63.5159	60.344	NaN	NaN	NaN	NaN	NaN	NaN	NaN	54.5791	14.3968	NaN	NaN	NaN	NaN	45.449	NaN	NaN	NaN	NaN	NaN	NaN	NaN	62.9706	18.0316	NaN	48.6855	NaN	27.5776	82.9963	NaN	NaN	100.43	NaN	14.0955	NaN	NaN	NaN	NaN	11.9175	NaN	NaN	NaN	NaN	34.511	3.28629	158.517	82.7367	70.1111
	61.7296	56.1099	NaN	NaN	NaN	NaN	NaN	NaN	NaN	52.1832	14.944	NaN	NaN	NaN	NaN	42.8303	NaN	NaN	NaN	NaN	NaN	NaN	NaN	60.5703	16.6681	NaN	46.5817	NaN	24.8548	84.0975	NaN	NaN	98.6609	NaN	25.2595	NaN	NaN	NaN	NaN	12.3461	NaN	NaN	NaN	NaN	35.1179	3.18195	158.805	81.3693	69.7724
	62.3467	55.6017	NaN	NaN	NaN	NaN	NaN	NaN	NaN	51.6776	15.767	NaN	NaN	NaN	NaN	41.1517	NaN	NaN	NaN	NaN	NaN	NaN	NaN	61.6399	17.0054	NaN	46.3588	NaN	24.7264	86.8675	NaN	NaN	99.7076	NaN	30.0991	NaN	NaN	NaN	NaN	12.2114	NaN	NaN	NaN	NaN	37.5135	5.80096	160.569	82.1	73.8418
	60.6422	54.0901	NaN	NaN	NaN	NaN	NaN	NaN	NaN	51.2523	15.4394	NaN	NaN	NaN	NaN	38.746	NaN	NaN	NaN	NaN	NaN	NaN	NaN	61.1336	18.6249	NaN	43.3184	NaN	23.1	90.994	NaN	NaN	99.3443	NaN	30.2784	NaN	NaN	NaN	NaN	13.0243	NaN	NaN	NaN	NaN	39.2861	8.19337	159.209	83.3883	76.3457
	57.8806	50.2801	NaN	NaN	NaN	NaN	NaN	NaN	NaN	54.5391	17.5508	NaN	NaN	NaN	NaN	38.069	NaN	NaN	NaN	NaN	NaN	NaN	NaN	56.8341	19.2558	NaN	40.051	NaN	19.6219	81.3575	NaN	NaN	101.162	NaN	16.409	NaN	NaN	NaN	NaN	12.819	NaN	NaN	NaN	NaN	39.2386	10.0378	159.61	84.2946	74.1544
	55.2212	50.9075	NaN	NaN	NaN	NaN	NaN	NaN	NaN	53.3812	15.0617	NaN	NaN	NaN	NaN	33.8582	NaN	NaN	NaN	NaN	NaN	NaN	NaN	54.4132	18.8406	NaN	39.1217	NaN	17.6908	95.4831	NaN	NaN	99.5456	NaN	19.6775	NaN	NaN	NaN	NaN	11.4261	NaN	NaN	NaN	NaN	38.0534	8.68459	156.684	82.2418	69.3858
	54.1822	49.3274	NaN	NaN	NaN	NaN	NaN	NaN	NaN	25.9452	14.8886	NaN	NaN	NaN	NaN	32.0586	NaN	NaN	NaN	NaN	NaN	NaN	NaN	54.5297	19.7917	NaN	38.9619	NaN	20.8042	98.8028	NaN	NaN	94.55	NaN	33.3949	NaN	NaN	NaN	NaN	11.6096	NaN	NaN	NaN	NaN	38.1437	9.51653	158.178	83.1744	68.8387
	61.4945	44.4638	NaN	NaN	NaN	NaN	NaN	NaN	NaN	51.465	13.5643	NaN	NaN	NaN	NaN	31.9094	NaN	NaN	NaN	NaN	NaN	NaN	NaN	51.8716	17.8196	NaN	35.747	NaN	18.8116	98.5889	NaN	NaN	90.6399	NaN	33.9809	NaN	NaN	NaN	NaN	10.4246	NaN	NaN	NaN	NaN	34.5493	8.90266	158.109	80.4397	65.7211
	45.7866	47.8187	NaN	NaN	NaN	NaN	NaN	NaN	NaN	36.7136	13.0163	NaN	NaN	NaN	NaN	31.5092	NaN	NaN	NaN	NaN	NaN	NaN	NaN	52.0296	18.5491	NaN	36.7897	NaN	21.6738	100.695	NaN	NaN	91.9789	NaN	23.3437	NaN	NaN	NaN	NaN	10.3694	NaN	NaN	NaN	NaN	34.6699	10.1773	159.188	81.9637	65.1043
	42.6052	44.1316	NaN	NaN	NaN	NaN	NaN	NaN	NaN	38.0377	16.3062	NaN	NaN	NaN	NaN	30.796	NaN	NaN	NaN	NaN	NaN	NaN	NaN	50.5627	18.0843	NaN	35.5384	NaN	19.34	98.1684	NaN	NaN	89.8241	NaN	41.5861	NaN	NaN	NaN	NaN	9.31704	NaN	NaN	NaN	NaN	30.1059	9.99881	158.52	77.0315	63.591
	42.8934	45.6192	NaN	NaN	NaN	NaN	NaN	NaN	NaN	39.7656	36.7976	NaN	NaN	NaN	NaN	31.1992	NaN	NaN	NaN	NaN	NaN	NaN	NaN	50.3771	19.6053	NaN	36.2338	NaN	19.9026	99.9162	NaN	NaN	90.6747	NaN	46.5792	NaN	NaN	NaN	NaN	9.38548	NaN	NaN	NaN	NaN	29.846	11.0842	160.068	77.3289	63.1961
	39.2095	43.4505	NaN	NaN	NaN	NaN	NaN	NaN	NaN	37.0035	33.5126	NaN	NaN	NaN	NaN	32.4404	NaN	NaN	NaN	NaN	NaN	NaN	NaN	49.5275	18.5485	NaN	35.8511	NaN	18.6038	96.5832	NaN	NaN	86.8547	NaN	46.9216	NaN	NaN	NaN	NaN	9.26069	NaN	NaN	NaN	NaN	27.5979	9.58009	159.405	76.7114	61.7735
	39.5638	44.4548	NaN	NaN	NaN	NaN	NaN	NaN	NaN	38.2329	34.1721	NaN	NaN	NaN	NaN	35.4521	NaN	NaN	NaN	NaN	NaN	NaN	NaN	48.9613	17.2459	NaN	36.5891	NaN	17.6154	99.6417	NaN	NaN	87.6129	NaN	49.3954	NaN	NaN	NaN	NaN	9.51685	NaN	NaN	NaN	NaN	29.6021	10.1676	159.787	77.9428	63.0879
	36.4967	43.8056	NaN	NaN	NaN	NaN	NaN	NaN	NaN	37.818	33.5433	NaN	NaN	NaN	NaN	36.9536	NaN	NaN	NaN	NaN	NaN	NaN	NaN	45.8199	17.1096	NaN	37.5056	NaN	14.1059	99.66	NaN	NaN	84.8491	NaN	49.6164	NaN	NaN	NaN	NaN	9.65096	NaN	NaN	NaN	NaN	28.5258	6.51115	157.916	78.4383	62.9372
	37.7581	44.3026	NaN	NaN	NaN	NaN	NaN	NaN	NaN	38.1124	26.5519	NaN	NaN	NaN	NaN	39.5409	NaN	NaN	NaN	NaN	NaN	NaN	NaN	46.6525	19.5347	NaN	39.755	NaN	17.6052	102.272	NaN	NaN	84.3006	NaN	50.2003	NaN	NaN	NaN	NaN	10.3831	NaN	NaN	NaN	NaN	29.0062	5.76005	156.847	80.8805	63.713
	37.3159	42.9436	NaN	NaN	NaN	NaN	NaN	NaN	NaN	40.0962	35.1551	NaN	NaN	NaN	NaN	39.1255	NaN	NaN	NaN	NaN	NaN	NaN	NaN	45.0927	20.7372	NaN	39.8256	NaN	15.6469	100.877	NaN	NaN	82.3128	NaN	49.9159	NaN	NaN	NaN	NaN	9.52781	NaN	NaN	NaN	NaN	28.8233	2.87024	152.098	78.6744	63.7729
	39.7139	43.9527	NaN	NaN	NaN	NaN	NaN	NaN	NaN	42.0076	33.8424	NaN	NaN	NaN	NaN	39.8261	NaN	NaN	NaN	NaN	NaN	NaN	NaN	49.3545	22.5712	NaN	41.6225	NaN	17.8109	101.831	NaN	NaN	83.8548	NaN	50.0254	NaN	NaN	NaN	NaN	9.61714	NaN	NaN	NaN	NaN	30.0356	2.1809	151.113	81.7891	65.0136
	40.712	48.1676	NaN	NaN	NaN	NaN	NaN	NaN	NaN	42.5804	33.8577	NaN	NaN	NaN	NaN	39.262	NaN	NaN	NaN	NaN	NaN	NaN	NaN	46.0943	21.2809	NaN	42.4805	NaN	16.6238	100.578	NaN	NaN	81.7416	NaN	48.2995	NaN	NaN	NaN	NaN	8.25197	NaN	NaN	NaN	NaN	30.3684	0.144858	149.568	80.903	66.3739
	42.9084	52.1151	NaN	NaN	NaN	NaN	NaN	NaN	NaN	45.3479	30.0476	NaN	NaN	NaN	NaN	39.4285	NaN	NaN	NaN	NaN	NaN	NaN	NaN	48.3608	23.2431	NaN	44.1494	NaN	18.0273	100.679	NaN	NaN	84.7917	NaN	47.2966	NaN	NaN	NaN	NaN	8.82754	NaN	NaN	NaN	NaN	32.0688	-0.29383	149.488	80.8028	69.0126
	42.6507	54.0082	NaN	NaN	NaN	NaN	NaN	NaN	NaN	46.9126	9.62721	NaN	NaN	NaN	NaN	38.816	NaN	NaN	NaN	NaN	NaN	NaN	NaN	47.1403	22.4535	NaN	44.5959	NaN	16.8574	96.8574	NaN	NaN	83.8182	NaN	45.1889	NaN	NaN	NaN	NaN	8.12721	NaN	NaN	NaN	NaN	32.583	-0.735406	147.425	78.902	69.3831
	47.2436	57.7879	NaN	NaN	NaN	NaN	NaN	NaN	NaN	48.9547	10.5022	NaN	NaN	NaN	NaN	39.429	NaN	NaN	NaN	NaN	NaN	NaN	NaN	49.1473	21.9731	NaN	47.5415	NaN	20.1839	95.2478	NaN	NaN	85.7703	NaN	42.7527	NaN	NaN	NaN	NaN	8.2762	NaN	NaN	NaN	NaN	34.291	1.25002	147.41	79.4989	74.1684
	48.2712	59.1804	NaN	NaN	NaN	NaN	NaN	NaN	NaN	49.8193	12.4471	NaN	NaN	NaN	NaN	38.3038	NaN	NaN	NaN	NaN	NaN	NaN	NaN	49.9833	18.2914	NaN	47.263	NaN	18.8339	101.204	NaN	NaN	86.9495	NaN	49.1624	NaN	NaN	NaN	NaN	8.10827	NaN	NaN	NaN	NaN	33.5764	0.58316	145.489	80.0448	75.9179
	51.3358	62.1269	NaN	NaN	NaN	NaN	NaN	NaN	NaN	51.2095	15.0618	NaN	NaN	NaN	NaN	37.8769	NaN	NaN	NaN	NaN	NaN	NaN	NaN	51.3017	18.1914	NaN	51.8126	NaN	21.8234	88.7797	NaN	NaN	89.4064	NaN	34.6801	NaN	NaN	NaN	NaN	9.33511	NaN	NaN	NaN	NaN	34.0289	2.25448	145.772	81.2967	67.6932
	51.9734	62.7336	NaN	NaN	NaN	NaN	NaN	NaN	NaN	51.1478	14.6614	NaN	NaN	NaN	NaN	37.3341	NaN	NaN	NaN	NaN	NaN	NaN	NaN	50.7219	15.8083	NaN	53.2723	NaN	22.3784	98.7681	NaN	NaN	89.1184	NaN	46.2427	NaN	NaN	NaN	NaN	10.483	NaN	NaN	NaN	NaN	33.7975	2.60072	144.61	80.4474	83.3665
	53.5548	65.5977	NaN	NaN	NaN	NaN	NaN	NaN	NaN	52.2021	15.3528	NaN	NaN	NaN	NaN	38.3776	NaN	NaN	NaN	NaN	NaN	NaN	NaN	53.8702	17.5523	NaN	55.5481	NaN	18.5206	81.7603	NaN	NaN	90.3183	NaN	25.78	NaN	NaN	NaN	NaN	10.5727	NaN	NaN	NaN	NaN	35.9317	3.62063	143.736	82.0827	86.3505
	55.0725	67.664	NaN	NaN	NaN	NaN	NaN	NaN	NaN	52.4543	16.0636	NaN	NaN	NaN	NaN	37.294	NaN	NaN	NaN	NaN	NaN	NaN	NaN	54.0418	15.9994	NaN	56.6697	NaN	32.6492	78.2245	NaN	NaN	86.1373	NaN	45.9575	NaN	NaN	NaN	NaN	10.5374	NaN	NaN	NaN	NaN	35.8414	4.20937	142.03	81.5754	84.9694
	56.4487	71.7097	NaN	NaN	NaN	NaN	NaN	NaN	NaN	54.8579	17.3206	NaN	NaN	NaN	NaN	37.6485	NaN	NaN	NaN	NaN	NaN	NaN	NaN	53.6159	14.4912	NaN	57.0522	NaN	33.4099	78.2596	NaN	NaN	84.7554	NaN	20.368	NaN	NaN	NaN	NaN	11.4895	NaN	NaN	NaN	NaN	37.295	6.34386	144.357	82.3918	88.8144
	57.5564	72.0548	NaN	NaN	NaN	NaN	NaN	NaN	NaN	53.7519	14.8616	NaN	NaN	NaN	NaN	36.7663	NaN	NaN	NaN	NaN	NaN	NaN	NaN	53.8902	15.3217	NaN	56.9741	NaN	31.788	75.8122	NaN	NaN	81.2336	NaN	17.3849	NaN	NaN	NaN	NaN	10.6196	NaN	NaN	NaN	NaN	37.8436	8.29644	146.237	82.915	91.1836
	59.031	73.2194	NaN	NaN	NaN	NaN	NaN	NaN	NaN	53.6281	13.6782	NaN	NaN	NaN	NaN	37.9242	NaN	NaN	NaN	NaN	NaN	NaN	NaN	55.9832	17.3342	NaN	56.4072	NaN	31.3643	74.743	NaN	NaN	78.7936	NaN	17.0696	NaN	NaN	NaN	NaN	11.0979	NaN	NaN	NaN	NaN	40.5557	10.5499	149.674	83.7976	93.7781
	60.7089	71.0016	NaN	NaN	NaN	NaN	NaN	NaN	NaN	51.7542	11.9402	NaN	NaN	NaN	NaN	34.924	NaN	NaN	NaN	NaN	NaN	NaN	NaN	55.6424	17.5133	NaN	56.9043	NaN	29.3383	72.1543	NaN	NaN	88.2278	NaN	14.7036	NaN	NaN	NaN	NaN	10.3471	NaN	NaN	NaN	NaN	41.8025	11.102	150.96	83.2482	93.5969
	61.3448	71.6583	NaN	NaN	NaN	NaN	NaN	NaN	NaN	51.1921	14.177	NaN	NaN	NaN	NaN	36.9917	NaN	NaN	NaN	NaN	NaN	NaN	NaN	56.6481	18.4712	NaN	56.6407	NaN	29.8699	74.8703	NaN	NaN	72.3659	NaN	15.1663	NaN	NaN	NaN	NaN	10.455	NaN	NaN	NaN	NaN	45.1448	14.951	154.932	84.2936	98.5174
	60.6084	67.5037	NaN	NaN	NaN	NaN	NaN	NaN	NaN	46.4079	13.6912	NaN	NaN	NaN	NaN	35.9417	NaN	NaN	NaN	NaN	NaN	NaN	NaN	54.8714	17.6575	NaN	56.6297	NaN	29.5021	74.4126	NaN	NaN	68.6685	NaN	14.7645	NaN	NaN	NaN	NaN	10.074	NaN	NaN	NaN	NaN	45.9607	16.5639	154.896	84.5615	97.4891
	61.9898	65.2164	NaN	NaN	NaN	NaN	NaN	NaN	NaN	45.999	14.316	NaN	NaN	NaN	NaN	35.9068	NaN	NaN	NaN	NaN	NaN	NaN	NaN	56.9602	20.0925	NaN	56.6156	NaN	29.8604	77.795	NaN	NaN	66.9435	NaN	15.6759	NaN	NaN	NaN	NaN	10.3286	NaN	NaN	NaN	NaN	46.2798	19.4089	156.807	86.4629	98.8076
	61.8364	64.4751	NaN	NaN	NaN	NaN	NaN	NaN	NaN	42.0439	13.4699	NaN	NaN	NaN	NaN	35.7451	NaN	NaN	NaN	NaN	NaN	NaN	NaN	55.7163	20.602	NaN	57.0974	NaN	30.1884	81.3221	NaN	NaN	64.5903	NaN	15.5893	NaN	NaN	NaN	NaN	11.3664	NaN	NaN	NaN	NaN	46.5509	20.1559	157.179	87.4433	100.297
	59.3053	63.7794	NaN	NaN	NaN	NaN	NaN	NaN	NaN	37.6459	11.3739	NaN	NaN	NaN	NaN	34.1563	NaN	NaN	NaN	NaN	NaN	NaN	NaN	55.2171	24.8867	NaN	55.8909	NaN	30.7257	85.2489	NaN	NaN	63.1282	NaN	12.728	NaN	NaN	NaN	NaN	11.1153	NaN	NaN	NaN	NaN	44.6667	21.4709	154.693	88.1773	102.121
	59.8403	62.6219	NaN	NaN	NaN	NaN	NaN	NaN	NaN	48.8	10.8106	NaN	NaN	NaN	NaN	32.3215	NaN	NaN	NaN	NaN	NaN	NaN	NaN	52.2163	21.5547	NaN	52.7471	NaN	31.6661	84.8978	NaN	NaN	70.5172	NaN	13.72	NaN	NaN	NaN	NaN	10.9038	NaN	NaN	NaN	NaN	42.0144	23.7439	154.556	87.1061	102.025
	59.4767	61.5994	NaN	NaN	NaN	NaN	NaN	NaN	NaN	30.9473	11.6187	NaN	NaN	NaN	NaN	33.0165	NaN	NaN	NaN	NaN	NaN	NaN	NaN	50.9235	21.8514	NaN	52.8611	NaN	34.8103	87.4332	NaN	NaN	59.333	NaN	15.6687	NaN	NaN	NaN	NaN	10.9369	NaN	NaN	NaN	NaN	43.0343	24.421	155.166	87.0659	104.124
	59.2669	59.918	NaN	NaN	NaN	NaN	NaN	NaN	NaN	26.3512	11.4527	NaN	NaN	NaN	NaN	33.0984	NaN	NaN	NaN	NaN	NaN	NaN	NaN	46.9012	21.771	NaN	50.9886	NaN	35.5093	86.633	NaN	NaN	57.5476	NaN	16.3922	NaN	NaN	NaN	NaN	10.8465	NaN	NaN	NaN	NaN	41.3268	24.6236	155.832	85.9284	105.434
	60.3139	59.3518	NaN	NaN	NaN	NaN	NaN	NaN	NaN	27.0288	12.419	NaN	NaN	NaN	NaN	37.3224	NaN	NaN	NaN	NaN	NaN	NaN	NaN	47.1119	22.3748	NaN	50.6381	NaN	37.4141	87.7029	NaN	NaN	57.7288	NaN	21.2785	NaN	NaN	NaN	NaN	10.8002	NaN	NaN	NaN	NaN	41.6823	25.8025	156.052	86.0137	108.867
	59.3366	58.7792	NaN	NaN	NaN	NaN	NaN	NaN	NaN	22.6386	11.1514	NaN	NaN	NaN	NaN	38.7882	NaN	NaN	NaN	NaN	NaN	NaN	NaN	46.4947	20.7708	NaN	49.2437	NaN	38.7094	88.8048	NaN	NaN	56.2362	NaN	19.8776	NaN	NaN	NaN	NaN	10.4541	NaN	NaN	NaN	NaN	40.3974	23.8387	155.596	84.0299	110.291
	59.1325	59.3836	NaN	NaN	NaN	NaN	NaN	NaN	NaN	22.015	12.0548	NaN	NaN	NaN	NaN	43.6728	NaN	NaN	NaN	NaN	NaN	NaN	NaN	42.4456	22.7161	NaN	49.4367	NaN	41.8501	93.3106	NaN	NaN	58.5478	NaN	21.4134	NaN	NaN	NaN	NaN	10.3433	NaN	NaN	NaN	NaN	42.6285	23.0553	156.507	83.4302	112.066
	54.953	59.1309	NaN	NaN	NaN	NaN	NaN	NaN	NaN	21.139	10.4362	NaN	NaN	NaN	NaN	42.636	NaN	NaN	NaN	NaN	NaN	NaN	NaN	42.3966	22.4437	NaN	47.3104	NaN	42.2752	93.3554	NaN	NaN	56.2572	NaN	20.9721	NaN	NaN	NaN	NaN	9.49328	NaN	NaN	NaN	NaN	42.2116	21.7467	155.284	82.9639	112.736
	53.1904	59.2652	NaN	NaN	NaN	NaN	NaN	NaN	NaN	21.3233	11.5082	NaN	NaN	NaN	NaN	45.8089	NaN	NaN	NaN	NaN	NaN	NaN	NaN	42.281	24.16	NaN	46.754	NaN	36.4617	96.8906	NaN	NaN	58.5678	NaN	21.2423	NaN	NaN	NaN	NaN	9.95109	NaN	NaN	NaN	NaN	42.1062	21.7406	155.192	83.5608	115.474
	49.5628	59.0982	NaN	NaN	NaN	NaN	NaN	NaN	NaN	20.935	7.00322	NaN	NaN	NaN	NaN	46.4501	NaN	NaN	NaN	NaN	NaN	NaN	NaN	40.1229	23.4281	NaN	44.2091	NaN	49.5853	96.4522	NaN	NaN	56.8771	NaN	20.9066	NaN	NaN	NaN	NaN	8.67797	NaN	NaN	NaN	NaN	41.7148	21.0202	152.708	81.4494	115.955
	49.6723	59.4818	NaN	NaN	NaN	NaN	NaN	NaN	NaN	23.4916	6.62935	NaN	NaN	NaN	NaN	49.0714	NaN	NaN	NaN	NaN	NaN	NaN	NaN	40.9698	26.1901	NaN	44.3135	NaN	40.2798	97.3304	NaN	NaN	59.0387	NaN	21.1482	NaN	NaN	NaN	NaN	9.66155	NaN	NaN	NaN	NaN	42.3475	20.6235	152.32	81.504	118.509
	48.0762	59.0792	NaN	NaN	NaN	NaN	NaN	NaN	NaN	25.2448	6.73008	NaN	NaN	NaN	NaN	48.4147	NaN	NaN	NaN	NaN	NaN	NaN	NaN	39.1079	25.4114	NaN	40.2698	NaN	54.8195	95.3626	NaN	NaN	61.3467	NaN	19.7091	NaN	NaN	NaN	NaN	7.82292	NaN	NaN	NaN	NaN	40.8857	20.0845	150.783	79.539	119.487
	48.0309	61.505	NaN	NaN	NaN	NaN	NaN	NaN	NaN	30.1237	7.1386	NaN	NaN	NaN	NaN	48.6283	NaN	NaN	NaN	NaN	NaN	NaN	NaN	40.092	26.1428	NaN	40.9349	NaN	58.1388	96.6731	NaN	NaN	62.1874	NaN	18.8019	NaN	NaN	NaN	NaN	7.3899	NaN	NaN	NaN	NaN	44.2047	19.9451	152.44	78.762	121.594
	47.5919	61.7132	NaN	NaN	NaN	NaN	NaN	NaN	NaN	29.2759	8.12355	NaN	NaN	NaN	NaN	47.6801	NaN	NaN	NaN	NaN	NaN	NaN	NaN	39.1643	24.5989	NaN	40.3627	NaN	56.4693	95.1743	NaN	NaN	61.6685	NaN	14.9898	NaN	NaN	NaN	NaN	5.13836	NaN	NaN	NaN	NaN	45.214	20.6394	151.836	77.9817	121.879
	49.1781	62.6156	NaN	NaN	NaN	NaN	NaN	NaN	NaN	33.0207	11.6617	NaN	NaN	NaN	NaN	48.099	NaN	NaN	NaN	NaN	NaN	NaN	NaN	40.6484	28.4014	NaN	41.2127	NaN	57.4271	96.2938	NaN	NaN	65.7767	NaN	14.2074	NaN	NaN	NaN	NaN	4.50564	NaN	NaN	NaN	NaN	45.9363	21.6015	154.933	78.112	125.791
	48.9041	63.1055	NaN	NaN	NaN	NaN	NaN	NaN	NaN	33.4617	13.2761	NaN	NaN	NaN	NaN	44.8099	NaN	NaN	NaN	NaN	NaN	NaN	NaN	39.6055	25.1683	NaN	40.7178	NaN	56.5396	95.2951	NaN	NaN	68.0971	NaN	9.44251	NaN	NaN	NaN	NaN	4.11991	NaN	NaN	NaN	NaN	45.9672	21.8022	152.421	75.4726	123.737
	50.4033	64.9422	NaN	NaN	NaN	NaN	NaN	NaN	NaN	38.0749	16.2464	NaN	NaN	NaN	NaN	45.691	NaN	NaN	NaN	NaN	NaN	NaN	NaN	41.6124	26.864	NaN	42.8683	NaN	58.7553	96.9008	NaN	NaN	71.0555	NaN	9.36383	NaN	NaN	NaN	NaN	3.45252	NaN	NaN	NaN	NaN	47.397	23.9326	155.524	76.3236	128.008
	50.4741	64.8093	NaN	NaN	NaN	NaN	NaN	NaN	NaN	36.2444	15.155	NaN	NaN	NaN	NaN	44.7444	NaN	NaN	NaN	NaN	NaN	NaN	NaN	41.3586	24.6912	NaN	43.5343	NaN	58.2783	96.1025	NaN	NaN	72.9683	NaN	7.1602	NaN	NaN	NaN	NaN	2.39397	NaN	NaN	NaN	NaN	46.8733	21.6134	154.182	74.3389	126.273
	51.0763	67.8359	NaN	NaN	NaN	NaN	NaN	NaN	NaN	39.4282	17.8837	NaN	NaN	NaN	NaN	43.9153	NaN	NaN	NaN	NaN	NaN	NaN	NaN	43.8721	22.5254	NaN	45.7805	NaN	59.9462	98.5685	NaN	NaN	74.1523	NaN	6.42592	NaN	NaN	NaN	NaN	4.31911	NaN	NaN	NaN	NaN	46.6684	22.6197	154.491	75.7518	128.758
	51.1984	67.4361	NaN	NaN	NaN	NaN	NaN	NaN	NaN	40.5838	17.5706	NaN	NaN	NaN	NaN	42.7631	NaN	NaN	NaN	NaN	NaN	NaN	NaN	44.1562	22.8922	NaN	46.9699	NaN	60.793	95.7944	NaN	NaN	71.9029	NaN	4.19063	NaN	NaN	NaN	NaN	5.18915	NaN	NaN	NaN	NaN	44.8525	22.6392	152.251	71.7734	127.589
	53.9337	67.9279	NaN	NaN	NaN	NaN	NaN	NaN	NaN	41.56	18.8449	NaN	NaN	NaN	NaN	42.7877	NaN	NaN	NaN	NaN	NaN	NaN	NaN	46.9735	22.2926	NaN	49.4888	NaN	64.9292	97.1036	NaN	NaN	73.5078	NaN	3.7617	NaN	NaN	NaN	NaN	6.56502	NaN	NaN	NaN	NaN	47.9718	24.4674	153.177	70.7683	127.412
	54.1366	65.6447	NaN	NaN	NaN	NaN	NaN	NaN	NaN	41.3129	18.3779	NaN	NaN	NaN	NaN	39.9904	NaN	NaN	NaN	NaN	NaN	NaN	NaN	47.3565	21.3966	NaN	49.6221	NaN	64.1577	94.9732	NaN	NaN	73.652	NaN	4.78584	NaN	NaN	NaN	NaN	5.55296	NaN	NaN	NaN	NaN	46.3733	24.7959	152.607	69.0622	127.098
	57.3014	66.5994	NaN	NaN	NaN	NaN	NaN	NaN	NaN	43.7754	19.3055	NaN	NaN	NaN	NaN	40.8785	NaN	NaN	NaN	NaN	NaN	NaN	NaN	42.6153	22.0331	NaN	51.81	NaN	64.4071	94.7953	NaN	NaN	72.9374	NaN	6.02267	NaN	NaN	NaN	NaN	7.56849	NaN	NaN	NaN	NaN	46.6239	26.6008	154.479	68.9885	128.331
	57.5642	63.502	NaN	NaN	NaN	NaN	NaN	NaN	NaN	43.5064	19.9362	NaN	NaN	NaN	NaN	39.1491	NaN	NaN	NaN	NaN	NaN	NaN	NaN	52.3083	21.5455	NaN	52.8173	NaN	63.0151	97.1815	NaN	NaN	70.8771	NaN	5.9896	NaN	NaN	NaN	NaN	7.41052	NaN	NaN	NaN	NaN	43.8894	27.2926	153.026	67.5926	128.598
	62.0877	60.6028	NaN	NaN	NaN	NaN	NaN	NaN	NaN	43.6563	21.0797	NaN	NaN	NaN	NaN	41.8777	NaN	NaN	NaN	NaN	NaN	NaN	NaN	54.7295	23.2155	NaN	54.7636	NaN	62.3657	88.2446	NaN	NaN	70.3727	NaN	7.10335	NaN	NaN	NaN	NaN	10.2687	NaN	NaN	NaN	NaN	41.8481	30.0677	155.551	67.7313	129.813
	62.135	59.1321	NaN	NaN	NaN	NaN	NaN	NaN	NaN	42.4128	20.6138	NaN	NaN	NaN	NaN	41.1091	NaN	NaN	NaN	NaN	NaN	NaN	NaN	52.7078	23.8704	NaN	54.686	NaN	59.6692	86.0076	NaN	NaN	68.314	NaN	6.62423	NaN	NaN	NaN	NaN	13.0935	NaN	NaN	NaN	NaN	38.2647	29.1872	154.746	67.067	128.761
	63.6729	59.1246	NaN	NaN	NaN	NaN	NaN	NaN	NaN	42.6065	21.0679	NaN	NaN	NaN	NaN	42.598	NaN	NaN	NaN	NaN	NaN	NaN	NaN	53.4782	24.5148	NaN	55.1398	NaN	57.6119	84.3018	NaN	NaN	68.2492	NaN	7.72774	NaN	NaN	NaN	NaN	13.8128	NaN	NaN	NaN	NaN	38.4089	29.7186	157.151	67.8954	128.871
	62.8655	58.8157	NaN	NaN	NaN	NaN	NaN	NaN	NaN	38.9544	18.2649	NaN	NaN	NaN	NaN	42.7422	NaN	NaN	NaN	NaN	NaN	NaN	NaN	51.8771	24.6737	NaN	52.1299	NaN	53.3435	83.1592	NaN	NaN	65.0669	NaN	7.56516	NaN	NaN	NaN	NaN	16.2978	NaN	NaN	NaN	NaN	35.1588	28.2171	156.012	67.3842	128.119
	63.1102	60.2002	NaN	NaN	NaN	NaN	NaN	NaN	NaN	38.2178	17.5788	NaN	NaN	NaN	NaN	42.2114	NaN	NaN	NaN	NaN	NaN	NaN	NaN	52.2975	26.3198	NaN	51.3942	NaN	53.5252	83.802	NaN	NaN	64.0886	NaN	6.5211	NaN	NaN	NaN	NaN	8.83958	NaN	NaN	NaN	NaN	35.1933	28.0663	157.376	67.1865	128.731
	62.6304	60.3175	NaN	NaN	NaN	NaN	NaN	NaN	NaN	36.6052	17.3249	NaN	NaN	NaN	NaN	41.6045	NaN	NaN	NaN	NaN	NaN	NaN	NaN	51.6039	26.2173	NaN	48.944	NaN	52.0403	82.6639	NaN	NaN	63.7452	NaN	4.24265	NaN	NaN	NaN	NaN	24.1371	NaN	NaN	NaN	NaN	34.2415	26.5957	158.286	66.1535	128.739
	61.3972	63.7352	NaN	NaN	NaN	NaN	NaN	NaN	NaN	37.1166	12.5495	NaN	NaN	NaN	NaN	39.5896	NaN	NaN	NaN	NaN	NaN	NaN	NaN	51.644	27.1114	NaN	46.7633	NaN	52.6751	80.8009	NaN	NaN	61.8652	NaN	3.14998	NaN	NaN	NaN	NaN	26.8735	NaN	NaN	NaN	NaN	34.2035	23.6662	159.778	61.2457	128.604
	58.4764	61.062	NaN	NaN	NaN	NaN	NaN	NaN	NaN	33.5198	11.552	NaN	NaN	NaN	NaN	39.425	NaN	NaN	NaN	NaN	NaN	NaN	NaN	50.0291	26.0149	NaN	45.7312	NaN	55.4777	77.8107	NaN	NaN	61.3183	NaN	2.99452	NaN	NaN	NaN	NaN	25.4289	NaN	NaN	NaN	NaN	31.8343	22.5365	159.997	59.158	129.294
	58.208	63.2279	NaN	NaN	NaN	NaN	NaN	NaN	NaN	33.822	12.0958	NaN	NaN	NaN	NaN	42.4768	NaN	NaN	NaN	NaN	NaN	NaN	NaN	52.4102	26.1133	NaN	46.629	NaN	46.4413	80.2492	NaN	NaN	62.3232	NaN	4.74653	NaN	NaN	NaN	NaN	26.0467	NaN	NaN	NaN	NaN	33.1327	22.2772	162.242	60.3802	130.329
	55.8426	62.0159	NaN	NaN	NaN	NaN	NaN	NaN	NaN	31.9092	11.0098	NaN	NaN	NaN	NaN	43.791	NaN	NaN	NaN	NaN	NaN	NaN	NaN	51.3935	24.5098	NaN	45.8408	NaN	43.5855	78.979	NaN	NaN	61.8321	NaN	5.61512	NaN	NaN	NaN	NaN	24.7508	NaN	NaN	NaN	NaN	31.7697	21.2247	160.209	60.9506	131.532
	54.6657	61.5011	NaN	NaN	NaN	NaN	NaN	NaN	NaN	33.1485	11.9994	NaN	NaN	NaN	NaN	44.0842	NaN	NaN	NaN	NaN	NaN	NaN	NaN	56.386	25.148	NaN	47.5965	NaN	42.7524	82.2546	NaN	NaN	63.0292	NaN	5.93959	NaN	NaN	NaN	NaN	23.5991	NaN	NaN	NaN	NaN	32.718	23.2398	162.29	63.4626	133.717
	52.9871	61.2128	NaN	NaN	NaN	NaN	NaN	NaN	NaN	32.4405	9.19958	NaN	NaN	NaN	NaN	44.9933	NaN	NaN	NaN	NaN	NaN	NaN	NaN	55.0602	24.6635	NaN	46.2192	NaN	40.4821	82.8833	NaN	NaN	61.7946	NaN	6.4499	NaN	NaN	NaN	NaN	21.4855	NaN	NaN	NaN	NaN	31.2583	22.6043	159.817	65.4799	134.358
	53.9243	63.401	NaN	NaN	NaN	NaN	NaN	NaN	NaN	33.6033	8.83295	NaN	NaN	NaN	NaN	46.6772	NaN	NaN	NaN	NaN	NaN	NaN	NaN	58.8129	28.991	NaN	47.3474	NaN	41.0419	85.6052	NaN	NaN	62.6617	NaN	7.64573	NaN	NaN	NaN	NaN	22.5884	NaN	NaN	NaN	NaN	30.9157	23.2669	159.594	68.5628	136.053
	52.8906	64.1548	NaN	NaN	NaN	NaN	NaN	NaN	NaN	33.3533	6.72467	NaN	NaN	NaN	NaN	46.63	NaN	NaN	NaN	NaN	NaN	NaN	NaN	57.2454	26.8756	NaN	45.9263	NaN	39.1467	87.4317	NaN	NaN	60.4894	NaN	8.09422	NaN	NaN	NaN	NaN	21.6452	NaN	NaN	NaN	NaN	29.7198	21.9622	155.902	68.9536	135.838
	53.0005	64.4202	NaN	NaN	NaN	NaN	NaN	NaN	NaN	34.7897	6.12962	NaN	NaN	NaN	NaN	48.8252	NaN	NaN	NaN	NaN	NaN	NaN	NaN	61.632	28.6953	NaN	45.8794	NaN	42.5848	89.3612	NaN	NaN	60.3675	NaN	11.7628	NaN	NaN	NaN	NaN	22.1382	NaN	NaN	NaN	NaN	30.0668	22.2677	156.447	70.9999	137.357
	52.0574	60.7998	NaN	NaN	NaN	NaN	NaN	NaN	NaN	35.4237	4.01536	NaN	NaN	NaN	NaN	50.2051	NaN	NaN	NaN	NaN	NaN	NaN	NaN	62.7529	30.4897	NaN	43.4573	NaN	42.0652	91.3416	NaN	NaN	57.283	NaN	14.3674	NaN	NaN	NaN	NaN	19.4964	NaN	NaN	NaN	NaN	29.2148	22.1191	155.93	70.0907	138.744
	53.0888	61.4913	NaN	NaN	NaN	NaN	NaN	NaN	NaN	37.2303	5.33277	NaN	NaN	NaN	NaN	54.2915	NaN	NaN	NaN	NaN	NaN	NaN	NaN	65.5096	29.0905	NaN	42.7663	NaN	43.6377	92.1427	NaN	NaN	58.7043	NaN	16.4788	NaN	NaN	NaN	NaN	19.7276	NaN	NaN	NaN	NaN	30.2761	22.5504	156.72	70.2288	141.347
	53.2087	57.5066	NaN	NaN	NaN	NaN	NaN	NaN	NaN	34.7996	5.33633	NaN	NaN	NaN	NaN	53.5886	NaN	NaN	NaN	NaN	NaN	NaN	NaN	66.2931	27.5912	NaN	42.6213	NaN	43.6276	89.0677	NaN	NaN	57.765	NaN	16.8021	NaN	NaN	NaN	NaN	17.1047	NaN	NaN	NaN	NaN	30.9272	22.3148	156.797	69.7343	141.254
	56.2887	56.4395	NaN	NaN	NaN	NaN	NaN	NaN	NaN	36.1428	6.95132	NaN	NaN	NaN	NaN	47.7276	NaN	NaN	NaN	NaN	NaN	NaN	NaN	68.9631	27.9992	NaN	42.9954	NaN	44.8346	88.3964	NaN	NaN	59.1636	NaN	19.5455	NaN	NaN	NaN	NaN	16.5272	NaN	NaN	NaN	NaN	33.3634	22.859	158.102	69.6065	143.893
	55.9091	54.8584	NaN	NaN	NaN	NaN	NaN	NaN	NaN	34.4702	7.6824	NaN	NaN	NaN	NaN	49.5151	NaN	NaN	NaN	NaN	NaN	NaN	NaN	66.0589	26.6489	NaN	43.0258	NaN	44.3186	93.0647	NaN	NaN	59.499	NaN	17.3233	NaN	NaN	NaN	NaN	16.4409	NaN	NaN	NaN	NaN	32.7225	21.8242	159.01	69.7783	144.973
	58.2748	54.9226	NaN	NaN	NaN	NaN	NaN	NaN	NaN	34.6316	11.0677	NaN	NaN	NaN	NaN	54.5979	NaN	NaN	NaN	NaN	NaN	NaN	NaN	69.9276	28.547	NaN	45.8389	NaN	45.2998	94.4022	NaN	NaN	62.1105	NaN	20.0772	NaN	NaN	NaN	NaN	16.7016	NaN	NaN	NaN	NaN	34.5075	23.4512	159.662	70.1462	147.616
	58.2837	54.7845	NaN	NaN	NaN	NaN	NaN	NaN	NaN	30.9682	11.4648	NaN	NaN	NaN	NaN	50.6826	NaN	NaN	NaN	NaN	NaN	NaN	NaN	69.8929	27.8726	NaN	46.6551	NaN	44.5367	90.8472	NaN	NaN	61.3673	NaN	18.5273	NaN	NaN	NaN	NaN	15.5958	NaN	NaN	NaN	NaN	34.0394	21.837	159.571	67.7833	146.868
	60.4864	56.2747	NaN	NaN	NaN	NaN	NaN	NaN	NaN	35.4712	15.0962	NaN	NaN	NaN	NaN	48.0684	NaN	NaN	NaN	NaN	NaN	NaN	NaN	72.5287	29.5693	NaN	49.5192	NaN	46.2866	94.3447	NaN	NaN	64.9007	NaN	21.9469	NaN	NaN	NaN	NaN	15.5291	NaN	NaN	NaN	NaN	33.8323	21.3629	160.826	69.1821	148.593
	60.3351	57.8997	NaN	NaN	NaN	NaN	NaN	NaN	NaN	34.8285	15.5913	NaN	NaN	NaN	NaN	44.0022	NaN	NaN	NaN	NaN	NaN	NaN	NaN	71.4796	28.8168	NaN	49.6329	NaN	46.391	92.4863	NaN	NaN	62.5948	NaN	22.4745	NaN	NaN	NaN	NaN	15.4223	NaN	NaN	NaN	NaN	32.5647	20.5608	161.282	67.295	148.945
	61.6609	61.5436	NaN	NaN	NaN	NaN	NaN	NaN	NaN	39.1445	18.5993	NaN	NaN	NaN	NaN	44.3756	NaN	NaN	NaN	NaN	NaN	NaN	NaN	73.7272	27.9468	NaN	51.4725	NaN	48.6208	93.662	NaN	NaN	64.3292	NaN	24.239	NaN	NaN	NaN	NaN	16.5569	NaN	NaN	NaN	NaN	35.6109	20.4632	162.722	67.3855	150.975
	62.2902	62.34	NaN	NaN	NaN	NaN	NaN	NaN	NaN	38.4194	19.9695	NaN	NaN	NaN	NaN	43.3514	NaN	NaN	NaN	NaN	NaN	NaN	NaN	73.768	28.2864	NaN	50.5322	NaN	48.2153	90.5231	NaN	NaN	67.9736	NaN	26.2159	NaN	NaN	NaN	NaN	16.3018	NaN	NaN	NaN	NaN	36.2047	20.4733	164.059	65.5371	151.042
	62.8109	66.8626	NaN	NaN	NaN	NaN	NaN	NaN	NaN	41.353	23.0081	NaN	NaN	NaN	NaN	43.9503	NaN	NaN	NaN	NaN	NaN	NaN	NaN	75.3748	27.1834	NaN	52.0825	NaN	49.6738	92.9157	NaN	NaN	69.1062	NaN	27.37	NaN	NaN	NaN	NaN	19.4612	NaN	NaN	NaN	NaN	38.5007	21.3945	167.424	65.1224	152.99
	62.8066	63.4303	NaN	NaN	NaN	NaN	NaN	NaN	NaN	40.7081	23.1146	NaN	NaN	NaN	NaN	41.6745	NaN	NaN	NaN	NaN	NaN	NaN	NaN	74.1515	25.2264	NaN	50.8831	NaN	49.3471	91.4691	NaN	NaN	68.8428	NaN	27.5828	NaN	NaN	NaN	NaN	18.2152	NaN	NaN	NaN	NaN	40.0107	21.1882	167.671	63.2805	152.95
	64.3232	65.3954	NaN	NaN	NaN	NaN	NaN	NaN	NaN	43.2394	23.4355	NaN	NaN	NaN	NaN	41.9776	NaN	NaN	NaN	NaN	NaN	NaN	NaN	74.2813	25.4439	NaN	51.4248	NaN	50.0999	93.7908	NaN	NaN	72.3683	NaN	23.3568	NaN	NaN	NaN	NaN	18.7444	NaN	NaN	NaN	NaN	42.9357	22.2476	170.521	63.677	155.198
	64.9843	63.4099	NaN	NaN	NaN	NaN	NaN	NaN	NaN	42.88	22.653	NaN	NaN	NaN	NaN	41.5716	NaN	NaN	NaN	NaN	NaN	NaN	NaN	70.801	21.5326	NaN	49.0817	NaN	49.3853	95.4375	NaN	NaN	72.8183	NaN	31.1477	NaN	NaN	NaN	NaN	19.1797	NaN	NaN	NaN	NaN	40.223	21.5092	169.989	62.4289	154.973
	65.5529	65.54	NaN	NaN	NaN	NaN	NaN	NaN	NaN	43.5755	22.5207	NaN	NaN	NaN	NaN	42.8342	NaN	NaN	NaN	NaN	NaN	NaN	NaN	70.0662	21.7104	NaN	49.8708	NaN	48.7351	97.5069	NaN	NaN	75.7939	NaN	32.8459	NaN	NaN	NaN	NaN	21.846	NaN	NaN	NaN	NaN	43.6705	22.3266	171.057	63.3433	158.666
	65.1378	64.0126	NaN	NaN	NaN	NaN	NaN	NaN	NaN	43.4256	21.8613	NaN	NaN	NaN	NaN	42.5086	NaN	NaN	NaN	NaN	NaN	NaN	NaN	67.2357	20.3737	NaN	48.7698	NaN	47.78	98.8004	NaN	NaN	76.1761	NaN	33.4552	NaN	NaN	NaN	NaN	22.9416	NaN	NaN	NaN	NaN	42.5682	22.258	171.581	62.8692	157.84
	65.2388	65.8121	NaN	NaN	NaN	NaN	NaN	NaN	NaN	45.1276	22.1044	NaN	NaN	NaN	NaN	42.277	NaN	NaN	NaN	NaN	NaN	NaN	NaN	66.2501	20.6946	NaN	49.1838	NaN	46.8005	99.4881	NaN	NaN	76.9063	NaN	33.5411	NaN	NaN	NaN	NaN	25.1419	NaN	NaN	NaN	NaN	43.1341	22.3305	171.795	62.9878	159.648
	62.7606	66.4115	NaN	NaN	NaN	NaN	NaN	NaN	NaN	45.5285	21.6563	NaN	NaN	NaN	NaN	44.7446	NaN	NaN	NaN	NaN	NaN	NaN	NaN	62.927	20.4088	NaN	48.3072	NaN	44.8096	99.4915	NaN	NaN	75.4383	NaN	32.4526	NaN	NaN	NaN	NaN	25.2657	NaN	NaN	NaN	NaN	41.1369	22.3292	171.626	62.8393	159.655
	62.4245	70.0948	NaN	NaN	NaN	NaN	NaN	NaN	NaN	47.5975	21.6973	NaN	NaN	NaN	NaN	44.0703	NaN	NaN	NaN	NaN	NaN	NaN	NaN	63.2898	20.4013	NaN	48.8875	NaN	45.4942	101.288	NaN	NaN	75.4981	NaN	33.6535	NaN	NaN	NaN	NaN	25.4856	NaN	NaN	NaN	NaN	42.9191	22.683	172.135	62.6774	161.252
	59.4964	70.2261	NaN	NaN	NaN	NaN	NaN	NaN	NaN	51.0654	22.3984	NaN	NaN	NaN	NaN	46.2362	NaN	NaN	NaN	NaN	NaN	NaN	NaN	63.1775	21.1466	NaN	48.922	NaN	44.7555	99.7693	NaN	NaN	74.3865	NaN	34.0241	NaN	NaN	NaN	NaN	24.935	NaN	NaN	NaN	NaN	45.7185	23.2945	174.768	62.7966	163.16
	58.7994	70.0816	NaN	NaN	NaN	NaN	NaN	NaN	NaN	52.8972	22.9319	NaN	NaN	NaN	NaN	45.5364	NaN	NaN	NaN	NaN	NaN	NaN	NaN	61.0938	20.4572	NaN	49.4238	NaN	40.5001	98.132	NaN	NaN	72.2791	NaN	34.1453	NaN	NaN	NaN	NaN	20.8843	NaN	NaN	NaN	NaN	49.3312	23.3418	176	58.9041	165.342
	56.337	68.9685	NaN	NaN	NaN	NaN	NaN	NaN	NaN	50.5841	21.9861	NaN	NaN	NaN	NaN	43.5716	NaN	NaN	NaN	NaN	NaN	NaN	NaN	57.3683	20.0978	NaN	49.1383	NaN	38.0473	98.073	NaN	NaN	69.0417	NaN	33.588	NaN	NaN	NaN	NaN	20.8902	NaN	NaN	NaN	NaN	48.5551	23.6323	173.036	58.3422	165.183
	55.5264	68.6525	NaN	NaN	NaN	NaN	NaN	NaN	NaN	51.5691	21.3802	NaN	NaN	NaN	NaN	44.3649	NaN	NaN	NaN	NaN	NaN	NaN	NaN	56.9663	23.1995	NaN	49.8657	NaN	38.9411	99.3829	NaN	NaN	69.2467	NaN	34.8001	NaN	NaN	NaN	NaN	21.2337	NaN	NaN	NaN	NaN	48.9872	25.6902	172.945	60.1211	167.945
	54.8216	66.0759	NaN	NaN	NaN	NaN	NaN	NaN	NaN	48.6891	19.9599	NaN	NaN	NaN	NaN	43.7679	NaN	NaN	NaN	NaN	NaN	NaN	NaN	53.6062	22.239	NaN	48.7343	NaN	45.1248	100.653	NaN	NaN	66.8394	NaN	33.988	NaN	NaN	NaN	NaN	20.6178	NaN	NaN	NaN	NaN	46.1016	24.4472	168.575	59.1602	167.421
	53.7347	63.5965	NaN	NaN	NaN	NaN	NaN	NaN	NaN	50.7688	20.6663	NaN	NaN	NaN	NaN	44.0442	NaN	NaN	NaN	NaN	NaN	NaN	NaN	53.8524	26.0335	NaN	48.5854	NaN	33.4505	98.9507	NaN	NaN	68.3158	NaN	36.7897	NaN	NaN	NaN	NaN	20.5954	NaN	NaN	NaN	NaN	44.3057	25.0721	168.027	60.4348	170.891
	53.2918	62.3664	NaN	NaN	NaN	NaN	NaN	NaN	NaN	50.5788	20.8425	NaN	NaN	NaN	NaN	42.2977	NaN	NaN	NaN	NaN	NaN	NaN	NaN	50.9368	22.3747	NaN	46.6151	NaN	31.056	98.1025	NaN	NaN	66.2321	NaN	36.7021	NaN	NaN	NaN	NaN	20.6001	NaN	NaN	NaN	NaN	43.4172	24.8173	165.113	58.4091	165.262
	53.6713	62.3051	NaN	NaN	NaN	NaN	NaN	NaN	NaN	51.8837	21.0441	NaN	NaN	NaN	NaN	44.4354	NaN	NaN	NaN	NaN	NaN	NaN	NaN	52.109	25.0798	NaN	46.8523	NaN	31.9168	98.728	NaN	NaN	65.9375	NaN	40.6328	NaN	NaN	NaN	NaN	22.621	NaN	NaN	NaN	NaN	43.8307	24.7591	166.396	60.1993	166.564
	53.9052	60.1036	NaN	NaN	NaN	NaN	NaN	NaN	NaN	51.1689	20.0015	NaN	NaN	NaN	NaN	44.0664	NaN	NaN	NaN	NaN	NaN	NaN	NaN	50.8839	24.17	NaN	46.1757	NaN	30.2791	100.018	NaN	NaN	62.0843	NaN	41.4232	NaN	NaN	NaN	NaN	22.4558	NaN	NaN	NaN	NaN	42.5478	23.1481	164.816	59.133	168.753
	56.9696	62.4868	NaN	NaN	NaN	NaN	NaN	NaN	NaN	53.1152	20.2359	NaN	NaN	NaN	NaN	43.906	NaN	NaN	NaN	NaN	NaN	NaN	NaN	52.2722	23.527	NaN	47.5962	NaN	30.6131	99.8021	NaN	NaN	61.4719	NaN	42.4677	NaN	NaN	NaN	NaN	22.914	NaN	NaN	NaN	NaN	41.3118	24.8904	167.067	58.9526	171.604
	55.1114	59.9756	NaN	NaN	NaN	NaN	NaN	NaN	NaN	53.7727	20.3917	NaN	NaN	NaN	NaN	43.171	NaN	NaN	NaN	NaN	NaN	NaN	NaN	53.3575	20.723	NaN	45.9134	NaN	28.4165	98.5266	NaN	NaN	59.1729	NaN	39.7827	NaN	NaN	NaN	NaN	20.455	NaN	NaN	NaN	NaN	41.373	23.5657	167.245	58.3035	171.237
	58.6055	60.4875	NaN	NaN	NaN	NaN	NaN	NaN	NaN	53.9234	21.9889	NaN	NaN	NaN	NaN	29.8493	NaN	NaN	NaN	NaN	NaN	NaN	NaN	55.1363	25.3001	NaN	48.1253	NaN	30.8608	98.4153	NaN	NaN	58.6577	NaN	39.3016	NaN	NaN	NaN	NaN	20.0355	NaN	NaN	NaN	NaN	42.9925	23.6779	168.434	58.2135	173.829
	59.0251	60.287	NaN	NaN	NaN	NaN	NaN	NaN	NaN	53.8281	19.8388	NaN	NaN	NaN	NaN	44.2509	NaN	NaN	NaN	NaN	NaN	NaN	NaN	53.507	23.1142	NaN	48.6482	NaN	26.8934	94.1188	NaN	NaN	54.4259	NaN	37.1002	NaN	NaN	NaN	NaN	17.9015	NaN	NaN	NaN	NaN	43.2445	22.9963	165.743	59.8429	173.672
	60.9385	61.5812	NaN	NaN	NaN	NaN	NaN	NaN	NaN	54.3135	21.1283	NaN	NaN	NaN	NaN	24.2166	NaN	NaN	NaN	NaN	NaN	NaN	NaN	56.2269	26.4152	NaN	50.5207	NaN	28.6335	99.9101	NaN	NaN	55.6681	NaN	35.4964	NaN	NaN	NaN	NaN	17.2022	NaN	NaN	NaN	NaN	44.5276	23.4225	165.526	61.5776	176.17
	59.77	63.1702	NaN	NaN	NaN	NaN	NaN	NaN	NaN	52.9766	19.6465	NaN	NaN	NaN	NaN	22.3162	NaN	NaN	NaN	NaN	NaN	NaN	NaN	53.6523	25.8929	NaN	49.9984	NaN	27.6396	99.1643	NaN	NaN	53.4271	NaN	31.5723	NaN	NaN	NaN	NaN	16.4292	NaN	NaN	NaN	NaN	42.5839	23.6497	164.996	62.1941	174.617
	62.4631	65.7377	NaN	NaN	NaN	NaN	NaN	NaN	NaN	52.7528	21.2872	NaN	NaN	NaN	NaN	23.3424	NaN	NaN	NaN	NaN	NaN	NaN	NaN	56.6386	25.993	NaN	51.6181	NaN	30.7447	98.4709	NaN	NaN	55.7424	NaN	31.253	NaN	NaN	NaN	NaN	16.1152	NaN	NaN	NaN	NaN	46.459	23.9225	164.558	63.6402	175.178
	62.2549	69.4769	NaN	NaN	NaN	NaN	NaN	NaN	NaN	55.5314	21.888	NaN	NaN	NaN	NaN	22.565	NaN	NaN	NaN	NaN	NaN	NaN	NaN	56.6018	27.1391	NaN	51.7326	NaN	32.4121	96.267	NaN	NaN	56.5418	NaN	28.8677	NaN	NaN	NaN	NaN	14.4608	NaN	NaN	NaN	NaN	45.5634	21.7562	163.897	60.8766	171.047
	65.3859	72.705	NaN	NaN	NaN	NaN	NaN	NaN	NaN	56.5574	24.4137	NaN	NaN	NaN	NaN	26.0854	NaN	NaN	NaN	NaN	NaN	NaN	NaN	59.2496	24.7647	NaN	54.1246	NaN	35.9779	77.9518	NaN	NaN	53.1549	NaN	31.1517	NaN	NaN	NaN	NaN	14.2837	NaN	NaN	NaN	NaN	48.9051	23.8187	165.323	61.3636	171.913
	67.4714	74.623	NaN	NaN	NaN	NaN	NaN	NaN	NaN	57.6359	26.0405	NaN	NaN	NaN	NaN	27.5286	NaN	NaN	NaN	NaN	NaN	NaN	NaN	62.6115	14.5123	NaN	55.3057	NaN	35.821	99.5372	NaN	NaN	53.7676	NaN	31.3555	NaN	NaN	NaN	NaN	11.606	NaN	NaN	NaN	NaN	48.1805	23.4842	164.148	59.3109	172.279
	70.8972	78.3393	NaN	NaN	NaN	NaN	NaN	NaN	NaN	59.257	30.1841	NaN	NaN	NaN	NaN	31.4459	NaN	NaN	NaN	NaN	NaN	NaN	NaN	66.0112	17.7783	NaN	60.1717	NaN	29.1921	94.0118	NaN	NaN	55.8782	NaN	34.5489	NaN	NaN	NaN	NaN	15.1511	NaN	NaN	NaN	NaN	50.1685	24.8409	165.703	57.4426	171.751
	74.2108	78.6014	NaN	NaN	NaN	NaN	NaN	NaN	NaN	60.3537	34.2368	NaN	NaN	NaN	NaN	28.3982	NaN	NaN	NaN	NaN	NaN	NaN	NaN	67.3237	16.908	NaN	60.1205	NaN	40.0263	91.1654	NaN	NaN	57.7195	NaN	33.0532	NaN	NaN	NaN	NaN	14.4009	NaN	NaN	NaN	NaN	50.54	23.5459	165.634	55.2848	171.613
	77.9421	82.7917	NaN	NaN	NaN	NaN	NaN	NaN	NaN	63.6181	37.8903	NaN	NaN	NaN	NaN	31.9054	NaN	NaN	NaN	NaN	NaN	NaN	NaN	70.5935	25.9519	NaN	52.9286	NaN	44.5256	89.4962	NaN	NaN	60.3626	NaN	35.6909	NaN	NaN	NaN	NaN	15.9448	NaN	NaN	NaN	NaN	55.1638	28.2697	167.801	55.2815	174.285
	81.4008	84.6537	NaN	NaN	NaN	NaN	NaN	NaN	NaN	63.9614	37.9694	NaN	NaN	NaN	NaN	31.7323	NaN	NaN	NaN	NaN	NaN	NaN	NaN	72.4885	20.3974	NaN	67.3841	NaN	45.5677	87.889	NaN	NaN	63.5197	NaN	36.4546	NaN	NaN	NaN	NaN	16.0972	NaN	NaN	NaN	NaN	53.5516	28.4223	166.583	55.2169	174.178
	83.8803	89.1003	NaN	NaN	NaN	NaN	NaN	NaN	NaN	66.6419	42.6029	NaN	NaN	NaN	NaN	34.6793	NaN	NaN	NaN	NaN	NaN	NaN	NaN	74.4039	24.9213	NaN	70.677	NaN	50.118	88.0948	NaN	NaN	67.0133	NaN	37.9752	NaN	NaN	NaN	NaN	18.8057	NaN	NaN	NaN	NaN	54.3046	30.1299	166.884	57.3079	176.315
	85.1262	90.3455	NaN	NaN	NaN	NaN	NaN	NaN	NaN	67.0233	41.3886	NaN	NaN	NaN	NaN	34.0327	NaN	NaN	NaN	NaN	NaN	NaN	NaN	74.4595	24.8623	NaN	69.4614	NaN	52.9605	87.2162	NaN	NaN	66.5604	NaN	37.465	NaN	NaN	NaN	NaN	19.2915	NaN	NaN	NaN	NaN	52.2112	29.7053	166.627	56.3482	172.196
	87.7034	94.6742	NaN	NaN	NaN	NaN	NaN	NaN	NaN	71.2776	45.6026	NaN	NaN	NaN	NaN	38.1111	NaN	NaN	NaN	NaN	NaN	NaN	NaN	76.215	29.4108	NaN	71.6785	NaN	42.2759	90.3308	NaN	NaN	69.2843	NaN	38.8459	NaN	NaN	NaN	NaN	24.2109	NaN	NaN	NaN	NaN	53.4298	31.8131	168.73	58.765	176.281
	89.6673	96.8161	NaN	NaN	NaN	NaN	NaN	NaN	NaN	71.569	46.9224	NaN	NaN	NaN	NaN	39.4259	NaN	NaN	NaN	NaN	NaN	NaN	NaN	77.0217	27.0885	NaN	69.2603	NaN	62.2528	69.5866	NaN	NaN	68.162	NaN	36.4706	NaN	NaN	NaN	NaN	25.4811	NaN	NaN	NaN	NaN	52.8229	32.7053	167.779	59.2405	174.035
	92.5836	98.4812	NaN	NaN	NaN	NaN	NaN	NaN	NaN	65.3017	51.2699	NaN	NaN	NaN	NaN	33.2058	NaN	NaN	NaN	NaN	NaN	NaN	NaN	78.0162	22.6594	NaN	69.0306	NaN	47.8428	69.8593	NaN	NaN	69.1842	NaN	40.8245	NaN	NaN	NaN	NaN	30.1926	NaN	NaN	NaN	NaN	54.1797	36.1171	168.598	62.6531	177.615
	94.911	96.378	NaN	NaN	NaN	NaN	NaN	NaN	NaN	78.0398	52.2668	NaN	NaN	NaN	NaN	46.1094	NaN	NaN	NaN	NaN	NaN	NaN	NaN	78.5916	30.9413	NaN	81.0162	NaN	70.2729	87.6555	NaN	NaN	67.5613	NaN	39.7712	NaN	NaN	NaN	NaN	30.6781	NaN	NaN	NaN	NaN	54.9904	37.6792	167.038	61.339	176.801
	95.2381	97.3806	NaN	NaN	NaN	NaN	NaN	NaN	NaN	80.2191	54.2954	NaN	NaN	NaN	NaN	36.0719	NaN	NaN	NaN	NaN	NaN	NaN	NaN	81.1073	33.443	NaN	82.9919	NaN	47.6182	95.5954	NaN	NaN	69.6566	NaN	38.1554	NaN	NaN	NaN	NaN	34.9796	NaN	NaN	NaN	NaN	57.2187	40.8292	168.959	62.6955	179.288
	97.9967	96.8451	NaN	NaN	NaN	NaN	NaN	NaN	NaN	83.999	54.0105	NaN	NaN	NaN	NaN	53.2943	NaN	NaN	NaN	NaN	NaN	NaN	NaN	81.9363	28.2496	NaN	85.8264	NaN	64.4628	79.9587	NaN	NaN	71.5766	NaN	44.9969	NaN	NaN	NaN	NaN	37.184	NaN	NaN	NaN	NaN	60.4963	44.426	165.237	64.1709	181.704
	100.981	92.7648	NaN	NaN	NaN	NaN	NaN	NaN	NaN	86.4479	54.898	NaN	NaN	NaN	NaN	56.6819	NaN	NaN	NaN	NaN	NaN	NaN	NaN	81.5376	44.0294	NaN	86.7318	NaN	81.3075	75.6169	NaN	NaN	73.541	NaN	43.9378	NaN	NaN	NaN	NaN	27.8368	NaN	NaN	NaN	NaN	63.2816	48.5134	163.273	65.8776	183.99
	101.314	92.9243	NaN	NaN	NaN	NaN	NaN	NaN	NaN	86.8611	52.5327	NaN	NaN	NaN	NaN	56.5023	NaN	NaN	NaN	NaN	NaN	NaN	NaN	78.7546	42.898	NaN	75.0234	NaN	86.2709	76.2286	NaN	NaN	71.578	NaN	41.1099	NaN	NaN	NaN	NaN	44.0579	NaN	NaN	NaN	NaN	62.6403	49.9031	161.921	67.9027	183.407
	103.139	94.2166	NaN	NaN	NaN	NaN	NaN	NaN	NaN	88.8648	52.5754	NaN	NaN	NaN	NaN	59.5566	NaN	NaN	NaN	NaN	NaN	NaN	NaN	78.4252	44.0303	NaN	78.5824	NaN	90.5191	78.8424	NaN	NaN	72.8677	NaN	44.9883	NaN	NaN	NaN	NaN	48.8262	NaN	NaN	NaN	NaN	63.3659	54.5646	160.489	69.2629	184.435
	103.967	96.1468	NaN	NaN	NaN	NaN	NaN	NaN	NaN	90.0591	49.1921	NaN	NaN	NaN	NaN	59.3511	NaN	NaN	NaN	NaN	NaN	NaN	NaN	74.1931	44.7791	NaN	73.9339	NaN	94.243	80.8277	NaN	NaN	68.917	NaN	43.5578	NaN	NaN	NaN	NaN	51.3878	NaN	NaN	NaN	NaN	63.0644	55.6222	157.543	71.2387	184.528
	106.685	100.215	NaN	NaN	NaN	NaN	NaN	NaN	NaN	91.2182	50.172	NaN	NaN	NaN	NaN	62.9899	NaN	NaN	NaN	NaN	NaN	NaN	NaN	74.5674	45.1456	NaN	72.8707	NaN	79.8845	85.7845	NaN	NaN	67.8667	NaN	44.7487	NaN	NaN	NaN	NaN	54.8699	NaN	NaN	NaN	NaN	62.3596	57.6407	158.245	73.4751	185.118
	106.844	92.8446	NaN	NaN	NaN	NaN	NaN	NaN	NaN	93.7198	49.473	NaN	NaN	NaN	NaN	63.7341	NaN	NaN	NaN	NaN	NaN	NaN	NaN	74.2339	44.1663	NaN	70.1186	NaN	102.041	86.209	NaN	NaN	65.5676	NaN	43.5289	NaN	NaN	NaN	NaN	58.1331	NaN	NaN	NaN	NaN	61.1389	58.1702	157.548	73.0865	184.146
	111.34	117.542	NaN	NaN	NaN	NaN	NaN	NaN	NaN	96.961	52.8547	NaN	NaN	NaN	NaN	67.1481	NaN	NaN	NaN	NaN	NaN	NaN	NaN	72.8157	47.5387	NaN	70.488	NaN	106.022	87.6343	NaN	NaN	64.6702	NaN	44.669	NaN	NaN	NaN	NaN	59.6264	NaN	NaN	NaN	NaN	61.1415	61.8076	157.781	73.3215	184.972
	111.259	95.1817	NaN	NaN	NaN	NaN	NaN	NaN	NaN	97.149	51.6782	NaN	NaN	NaN	NaN	69.3754	NaN	NaN	NaN	NaN	NaN	NaN	NaN	72.3583	46.1617	NaN	71.1091	NaN	109.504	86.8104	NaN	NaN	61.2235	NaN	43.3325	NaN	NaN	NaN	NaN	61.8694	NaN	NaN	NaN	NaN	58.4062	63.4373	155.451	71.0643	184.64
	114.049	98.1811	NaN	NaN	NaN	NaN	NaN	NaN	NaN	100.012	55.7178	NaN	NaN	NaN	NaN	73.5479	NaN	NaN	NaN	NaN	NaN	NaN	NaN	75.1232	44.9624	NaN	73.7374	NaN	111.092	90.6434	NaN	NaN	59.9767	NaN	45.312	NaN	NaN	NaN	NaN	64.2434	NaN	NaN	NaN	NaN	59.3733	64.3231	156.684	71.5459	186.732
	115.127	96.53	NaN	NaN	NaN	NaN	NaN	NaN	NaN	100.969	56.6811	NaN	NaN	NaN	NaN	71.5819	NaN	NaN	NaN	NaN	NaN	NaN	NaN	73.995	44.6559	NaN	72.4559	NaN	113.753	91.1992	NaN	NaN	57.6691	NaN	41.5301	NaN	NaN	NaN	NaN	66.4556	NaN	NaN	NaN	NaN	58.5079	66.0658	153.948	70.5244	183.803
	116.799	118.006	NaN	NaN	NaN	NaN	NaN	NaN	NaN	101.492	59.1994	NaN	NaN	NaN	NaN	72.8107	NaN	NaN	NaN	NaN	NaN	NaN	NaN	75.1381	57.7716	NaN	74.5519	NaN	118.051	86.9217	NaN	NaN	59.2812	NaN	42.227	NaN	NaN	NaN	NaN	68.2473	NaN	NaN	NaN	NaN	59.9841	69.635	153.273	73.8022	186.633
	116.869	114.074	NaN	NaN	NaN	NaN	NaN	NaN	NaN	103.059	59.0665	NaN	NaN	NaN	NaN	72.7477	NaN	NaN	NaN	NaN	NaN	NaN	NaN	72.1066	54.6342	NaN	70.1828	NaN	119.959	94.0209	NaN	NaN	57.2209	NaN	41.9823	NaN	NaN	NaN	NaN	70.112	NaN	NaN	NaN	NaN	60.0626	70.2911	152.539	73.614	186.016
	118.178	96.6814	NaN	NaN	NaN	NaN	NaN	NaN	NaN	103.216	62.248	NaN	NaN	NaN	NaN	73.9046	NaN	NaN	NaN	NaN	NaN	NaN	NaN	72.4176	59.1062	NaN	73.8772	NaN	110.298	88.7269	NaN	NaN	60.1812	NaN	43.7293	NaN	NaN	NaN	NaN	73.3526	NaN	NaN	NaN	NaN	61.03	72.4313	152.169	76.3442	188.099
	117.931	97.3556	NaN	NaN	NaN	NaN	NaN	NaN	NaN	102.831	63.2243	NaN	NaN	NaN	NaN	75.574	NaN	NaN	NaN	NaN	NaN	NaN	NaN	70.6405	55.3747	NaN	71.1908	NaN	128.412	97.8234	NaN	NaN	56.8558	NaN	45.1112	NaN	NaN	NaN	NaN	74.2648	NaN	NaN	NaN	NaN	61.7768	71.5938	151.165	76.6172	186.383
	119.184	117.193	NaN	NaN	NaN	NaN	NaN	NaN	NaN	104.488	68.1054	NaN	NaN	NaN	NaN	77.0622	NaN	NaN	NaN	NaN	NaN	NaN	NaN	71.1143	57.3967	NaN	72.0251	NaN	131.015	100.211	NaN	NaN	59.6284	NaN	49.7316	NaN	NaN	NaN	NaN	77.4307	NaN	NaN	NaN	NaN	61.6183	74.2504	152.795	77.6877	187.701
	118.77	116.04	NaN	NaN	NaN	NaN	NaN	NaN	NaN	103.142	71.1962	NaN	NaN	NaN	NaN	76.5884	NaN	NaN	NaN	NaN	NaN	NaN	NaN	69.7133	56.8784	NaN	71.4465	NaN	131.881	98.8425	NaN	NaN	59.7637	NaN	52.4261	NaN	NaN	NaN	NaN	78.0392	NaN	NaN	NaN	NaN	60.0899	72.7549	153.758	75.8864	187.074
	120.533	106.526	NaN	NaN	NaN	NaN	NaN	NaN	NaN	106.739	74.323	NaN	NaN	NaN	NaN	78.738	NaN	NaN	NaN	NaN	NaN	NaN	NaN	71.5668	60.5939	NaN	73.3028	NaN	134.276	98.1916	NaN	NaN	62.6076	NaN	54.9053	NaN	NaN	NaN	NaN	78.6566	NaN	NaN	NaN	NaN	63.2291	75.4147	155.088	76.0939	187.772
	121.574	102.413	NaN	NaN	NaN	NaN	NaN	NaN	NaN	104.693	76.4506	NaN	NaN	NaN	NaN	76.1522	NaN	NaN	NaN	NaN	NaN	NaN	NaN	70.5626	57.8251	NaN	74.7189	NaN	136.216	95.6333	NaN	NaN	63.8448	NaN	54.9592	NaN	NaN	NaN	NaN	78.5748	NaN	NaN	NaN	NaN	61.073	73.3671	156.245	75.5523	187.476
	125.412	100.99	NaN	NaN	NaN	NaN	NaN	NaN	NaN	105.489	80.2569	NaN	NaN	NaN	NaN	77.3229	NaN	NaN	NaN	NaN	NaN	NaN	NaN	71.5695	60.9312	NaN	76.385	NaN	137.448	97.255	NaN	NaN	65.1986	NaN	57.5869	NaN	NaN	NaN	NaN	79.3957	NaN	NaN	NaN	NaN	65.8178	74.742	158.329	77.7396	189.698
	124.287	99.3497	NaN	NaN	NaN	NaN	NaN	NaN	NaN	105.004	78.9245	NaN	NaN	NaN	NaN	76.8253	NaN	NaN	NaN	NaN	NaN	NaN	NaN	71.3737	62.896	NaN	76.9688	NaN	137.723	96.2754	NaN	NaN	65.1443	NaN	59.0095	NaN	NaN	NaN	NaN	78.9189	NaN	NaN	NaN	NaN	64.9529	73.4638	157.873	78.0098	188.111
	126.494	99.0312	NaN	NaN	NaN	NaN	NaN	NaN	NaN	103.608	83.4221	NaN	NaN	NaN	NaN	72.4521	NaN	NaN	NaN	NaN	NaN	NaN	NaN	72.3245	66.6683	NaN	80.0772	NaN	140.742	96.4169	NaN	NaN	67.8239	NaN	60.3918	NaN	NaN	NaN	NaN	80.487	NaN	NaN	NaN	NaN	68.5431	74.0484	158.413	79.4964	188.499
	125.891	97.2477	NaN	NaN	NaN	NaN	NaN	NaN	NaN	104.516	83.7276	NaN	NaN	NaN	NaN	70.3899	NaN	NaN	NaN	NaN	NaN	NaN	NaN	72.7528	64.4874	NaN	78.946	NaN	142.681	96.0866	NaN	NaN	65.4265	NaN	61.4283	NaN	NaN	NaN	NaN	79.6575	NaN	NaN	NaN	NaN	67.5979	72.8554	158.268	79.7958	186.577
	127.476	98.3348	NaN	NaN	NaN	NaN	NaN	NaN	NaN	103.995	87.4388	NaN	NaN	NaN	NaN	72.0643	NaN	NaN	NaN	NaN	NaN	NaN	NaN	73.6979	67.651	NaN	81.0739	NaN	145.888	99.0475	NaN	NaN	68.1671	NaN	61.9879	NaN	NaN	NaN	NaN	83.5526	NaN	NaN	NaN	NaN	67.7409	73.0107	159.162	80.4025	188.221
	128.592	97.6901	NaN	NaN	NaN	NaN	NaN	NaN	NaN	104.593	90.8431	NaN	NaN	NaN	NaN	72.3409	NaN	NaN	NaN	NaN	NaN	NaN	NaN	73.9993	66.8092	NaN	81.2244	NaN	145.13	97.7957	NaN	NaN	67.3993	NaN	61.9696	NaN	NaN	NaN	NaN	81.705	NaN	NaN	NaN	NaN	65.4615	71.9442	160.596	79.4257	186.991
	130.128	100.019	NaN	NaN	NaN	NaN	NaN	NaN	NaN	107.704	94.838	NaN	NaN	NaN	NaN	74.1437	NaN	NaN	NaN	NaN	NaN	NaN	NaN	74.5936	68.69	NaN	82.9646	NaN	148.07	98.1045	NaN	NaN	68.6243	NaN	63.2226	NaN	NaN	NaN	NaN	83.7001	NaN	NaN	NaN	NaN	66.4733	73.549	163.593	82.8942	187.606
	130.265	99.3907	NaN	NaN	NaN	NaN	NaN	NaN	NaN	108.082	98.6214	NaN	NaN	NaN	NaN	72.9558	NaN	NaN	NaN	NaN	NaN	NaN	NaN	74.6019	66.3666	NaN	84.6319	NaN	146.9	97.437	NaN	NaN	69.1576	NaN	61.1035	NaN	NaN	NaN	NaN	83.5252	NaN	NaN	NaN	NaN	64.6148	75.7158	162.737	81.5124	186.873
	132.287	98.8261	NaN	NaN	NaN	NaN	NaN	NaN	NaN	111.523	102.52	NaN	NaN	NaN	NaN	75.3283	NaN	NaN	NaN	NaN	NaN	NaN	NaN	77.5282	67.7062	NaN	85.6373	NaN	148.371	97.8214	NaN	NaN	70.4404	NaN	63.2848	NaN	NaN	NaN	NaN	84.5111	NaN	NaN	NaN	NaN	66.8556	76.4809	163.615	82.3411	189.044
	132.439	95.3228	NaN	NaN	NaN	NaN	NaN	NaN	NaN	111.666	103.376	NaN	NaN	NaN	NaN	75.0284	NaN	NaN	NaN	NaN	NaN	NaN	NaN	74.1193	65.9233	NaN	83.7643	NaN	147.606	97.8325	NaN	NaN	70.8366	NaN	60.7278	NaN	NaN	NaN	NaN	84.3242	NaN	NaN	NaN	NaN	66.0903	75.5555	160.496	81.444	189.072
	133.933	94.1363	NaN	NaN	NaN	NaN	NaN	NaN	NaN	114.278	92.8405	NaN	NaN	NaN	NaN	76.4388	NaN	NaN	NaN	NaN	NaN	NaN	NaN	76.732	67.4565	NaN	85.438	NaN	149.005	99.8305	NaN	NaN	71.9858	NaN	62.2131	NaN	NaN	NaN	NaN	85.6064	NaN	NaN	NaN	NaN	67.6325	75.8104	162.094	81.603	191.788
	134.358	94.2709	NaN	NaN	NaN	NaN	NaN	NaN	NaN	114.17	110.332	NaN	NaN	NaN	NaN	76.7464	NaN	NaN	NaN	NaN	NaN	NaN	NaN	74.4302	66.5907	NaN	84.0226	NaN	149.997	101.21	NaN	NaN	72.2745	NaN	58.8071	NaN	NaN	NaN	NaN	87.8716	NaN	NaN	NaN	NaN	67.5425	74.2532	161.566	83.4075	191.19
	132.484	94.177	NaN	NaN	NaN	NaN	NaN	NaN	NaN	116.515	110.999	NaN	NaN	NaN	NaN	76.686	NaN	NaN	NaN	NaN	NaN	NaN	NaN	76.0651	65.7846	NaN	81.5979	NaN	151.625	101.424	NaN	NaN	73.0621	NaN	57.2937	NaN	NaN	NaN	NaN	88.0494	NaN	NaN	NaN	NaN	69.2226	70.4881	159.442	85.517	192.33
	132.593	93.8902	NaN	NaN	NaN	NaN	NaN	NaN	NaN	116.668	112.14	NaN	NaN	NaN	NaN	77.8204	NaN	NaN	NaN	NaN	NaN	NaN	NaN	75.8237	61.9995	NaN	78.7746	NaN	150.801	98.4138	NaN	NaN	71.7643	NaN	57.4803	NaN	NaN	NaN	NaN	87.3472	NaN	NaN	NaN	NaN	67.5052	68.0485	157.132	83.945	191.325
	132.81	95.9778	NaN	NaN	NaN	NaN	NaN	NaN	NaN	120.095	116.57	NaN	NaN	NaN	NaN	80.6957	NaN	NaN	NaN	NaN	NaN	NaN	NaN	60.3105	60.3697	NaN	78.2008	NaN	154.963	96.9266	NaN	NaN	73.9686	NaN	58.7911	NaN	NaN	NaN	NaN	90.5241	NaN	NaN	NaN	NaN	67.3256	67.6546	156.837	84.4073	193.187
	133.808	96.7961	NaN	NaN	NaN	NaN	NaN	NaN	NaN	122.538	117.724	NaN	NaN	NaN	NaN	81.705	NaN	NaN	NaN	NaN	NaN	NaN	NaN	75.5811	55.5246	NaN	76.2815	NaN	152.723	100.52	NaN	NaN	73.0937	NaN	59.4021	NaN	NaN	NaN	NaN	89.3694	NaN	NaN	NaN	NaN	65.6601	64.7454	154.139	82.5286	192.507
	135.287	99.4729	NaN	NaN	NaN	NaN	NaN	NaN	NaN	124.924	122.284	NaN	NaN	NaN	NaN	85.942	NaN	NaN	NaN	NaN	NaN	NaN	NaN	51.6504	54.8525	NaN	76.1411	NaN	155.079	90.8136	NaN	NaN	73.5764	NaN	63.2308	NaN	NaN	NaN	NaN	89.6447	NaN	NaN	NaN	NaN	65.6252	64.9659	154.054	84.7701	194.698
	135.437	98.8984	NaN	NaN	NaN	NaN	NaN	NaN	NaN	126.527	123.808	NaN	NaN	NaN	NaN	86.3072	NaN	NaN	NaN	NaN	NaN	NaN	NaN	75.9444	51.8809	NaN	75.7642	NaN	153.865	86.0544	NaN	NaN	73.3797	NaN	60.1449	NaN	NaN	NaN	NaN	91.3368	NaN	NaN	NaN	NaN	61.7182	63.3144	150.68	82.5292	195.356
	135.897	103.316	NaN	NaN	NaN	NaN	NaN	NaN	NaN	129.532	114.355	NaN	NaN	NaN	NaN	90.3823	NaN	NaN	NaN	NaN	NaN	NaN	NaN	71.9451	51.8355	NaN	77.8938	NaN	157.189	85.7735	NaN	NaN	75.0719	NaN	64.9219	NaN	NaN	NaN	NaN	92.0569	NaN	NaN	NaN	NaN	63.3803	64.0163	149.961	82.6533	197.211
	133.076	101.468	NaN	NaN	NaN	NaN	NaN	NaN	NaN	130.512	128.447	NaN	NaN	NaN	NaN	90.1182	NaN	NaN	NaN	NaN	NaN	NaN	NaN	67.9458	50.4	NaN	78.1554	NaN	155.315	83.3197	NaN	NaN	74.1529	NaN	64.6493	NaN	NaN	NaN	NaN	91.9726	NaN	NaN	NaN	NaN	59.7973	63.8751	155.488	77.9255	196.628
	131.673	98.1345	NaN	NaN	NaN	NaN	NaN	NaN	NaN	130.105	131.955	NaN	NaN	NaN	NaN	92.6264	NaN	NaN	NaN	NaN	NaN	NaN	NaN	65.8716	54.7608	NaN	79.7088	NaN	158.382	85.1857	NaN	NaN	73.8495	NaN	66.7143	NaN	NaN	NaN	NaN	93.2507	NaN	NaN	NaN	NaN	59.1998	63.792	141.309	80.2644	198.766
	135.362	109.766	NaN	NaN	NaN	NaN	NaN	NaN	NaN	132.588	129.654	NaN	NaN	NaN	NaN	93.8833	NaN	NaN	NaN	NaN	NaN	NaN	NaN	63.7974	53.3667	NaN	78.9541	NaN	159.979	84.0747	NaN	NaN	71.9643	NaN	65.4414	NaN	NaN	NaN	NaN	93.7714	NaN	NaN	NaN	NaN	56.6702	63.2907	152.367	78.3995	197.214
	123.306	113.847	NaN	NaN	NaN	NaN	NaN	NaN	NaN	134.407	131.227	NaN	NaN	NaN	NaN	96.6646	NaN	NaN	NaN	NaN	NaN	NaN	NaN	41.7719	67.983	NaN	82.73	NaN	161.405	87.0805	NaN	NaN	70.7201	NaN	69.2076	NaN	NaN	NaN	NaN	97.7356	NaN	NaN	NaN	NaN	56.7411	63.6555	131.578	79.8071	197.688
	118.544	116.262	NaN	NaN	NaN	NaN	NaN	NaN	NaN	135.843	130.239	NaN	NaN	NaN	NaN	96.6271	NaN	NaN	NaN	NaN	NaN	NaN	NaN	19.7464	67.7047	NaN	80.5974	NaN	161.694	85.7151	NaN	NaN	68.3777	NaN	69.6118	NaN	NaN	NaN	NaN	97.6614	NaN	NaN	NaN	NaN	56.5244	64.0691	127.682	75.4525	196.547
	116.568	99.8014	NaN	NaN	NaN	NaN	NaN	NaN	NaN	138.657	131.626	NaN	NaN	NaN	NaN	99.7359	NaN	NaN	NaN	NaN	NaN	NaN	NaN	19.4883	70.9562	NaN	83.2534	NaN	165.005	89.1326	NaN	NaN	68.0209	NaN	74.0832	NaN	NaN	NaN	NaN	101.864	NaN	NaN	NaN	NaN	56.9374	65.3193	124.647	77.0034	197.204
	115.152	119.801	NaN	NaN	NaN	NaN	NaN	NaN	NaN	140.217	130.941	NaN	NaN	NaN	NaN	99.0772	NaN	NaN	NaN	NaN	NaN	NaN	NaN	18.273	71.9026	NaN	82.1359	NaN	163.254	85.0904	NaN	NaN	63.9841	NaN	75.0334	NaN	NaN	NaN	NaN	100.404	NaN	NaN	NaN	NaN	57.2472	66.4411	121.884	75.799	196.961
	114.37	111.806	NaN	NaN	NaN	NaN	NaN	NaN	NaN	142.221	132.219	NaN	NaN	NaN	NaN	100.593	NaN	NaN	NaN	NaN	NaN	NaN	NaN	17.9035	75.9568	NaN	85.1412	NaN	164.785	86.895	NaN	NaN	63.809	NaN	67.3245	NaN	NaN	NaN	NaN	104.061	NaN	NaN	NaN	NaN	58.2371	69.6344	120.962	79.3335	198.825
	114.818	127.089	NaN	NaN	NaN	NaN	NaN	NaN	NaN	141.016	131.705	NaN	NaN	NaN	NaN	97.5671	NaN	NaN	NaN	NaN	NaN	NaN	NaN	18.086	77.5003	NaN	85.7364	NaN	164.61	85.3695	NaN	NaN	62.1658	NaN	78.4377	NaN	NaN	NaN	NaN	104.45	NaN	NaN	NaN	NaN	58.3189	71.12	129.63	79.2911	198.603
	117.157	129.689	NaN	NaN	NaN	NaN	NaN	NaN	NaN	143.414	135.629	NaN	NaN	NaN	NaN	97.7635	NaN	NaN	NaN	NaN	NaN	NaN	NaN	21.3838	69.3305	NaN	87.5043	NaN	166.786	86.0326	NaN	NaN	62.3098	NaN	82.0859	NaN	NaN	NaN	NaN	109.038	NaN	NaN	NaN	NaN	61.3729	73.2476	114.27	82.9932	201.067
	117.73	130.575	NaN	NaN	NaN	NaN	NaN	NaN	NaN	141.718	133.312	NaN	NaN	NaN	NaN	96.6925	NaN	NaN	NaN	NaN	NaN	NaN	NaN	21.8052	83.2002	NaN	88.0224	NaN	169.001	85.5196	NaN	NaN	60.4056	NaN	82.6952	NaN	NaN	NaN	NaN	109.361	NaN	NaN	NaN	NaN	61.2015	72.0465	110.651	84.3896	201.552
	119.542	134.459	NaN	NaN	NaN	NaN	NaN	NaN	NaN	144.164	134.986	NaN	NaN	NaN	NaN	97.8327	NaN	NaN	NaN	NaN	NaN	NaN	NaN	24.7242	73.9297	NaN	87.8478	NaN	170.961	88.7312	NaN	NaN	63.4064	NaN	82.7122	NaN	NaN	NaN	NaN	113.235	NaN	NaN	NaN	NaN	64.4247	75.7901	110.709	88.8846	202.69
	119.564	133.863	NaN	NaN	NaN	NaN	NaN	NaN	NaN	143.811	134.59	NaN	NaN	NaN	NaN	97.5153	NaN	NaN	NaN	NaN	NaN	NaN	NaN	19.7525	76.7286	NaN	87.6253	NaN	171.424	87.7064	NaN	NaN	62.9326	NaN	81.4957	NaN	NaN	NaN	NaN	114.907	NaN	NaN	NaN	NaN	64.0205	75.788	125.296	89.3818	199.315
	121.625	137.5	NaN	NaN	NaN	NaN	NaN	NaN	NaN	146.463	136.141	NaN	NaN	NaN	NaN	97.9393	NaN	NaN	NaN	NaN	NaN	NaN	NaN	21.1985	78.7738	NaN	88.6868	NaN	175.242	89.6988	NaN	NaN	63.5696	NaN	80.9426	NaN	NaN	NaN	NaN	117.718	NaN	NaN	NaN	NaN	65.8437	77.0632	104.371	93.0865	200.172
	122.965	138.161	NaN	NaN	NaN	NaN	NaN	NaN	NaN	147.069	135.98	NaN	NaN	NaN	NaN	98.9864	NaN	NaN	NaN	NaN	NaN	NaN	NaN	20.8734	76.3762	NaN	86.7841	NaN	174.992	86.7857	NaN	NaN	63.9025	NaN	78.7807	NaN	NaN	NaN	NaN	117.909	NaN	NaN	NaN	NaN	64.0009	76.4033	102.122	88.6485	198.89
	126.285	139.774	NaN	NaN	NaN	NaN	NaN	NaN	NaN	150.729	137.649	NaN	NaN	NaN	NaN	101.332	NaN	NaN	NaN	NaN	NaN	NaN	NaN	21.2595	76.5771	NaN	87.3913	NaN	175.669	87.1254	NaN	NaN	66.1192	NaN	78.3325	NaN	NaN	NaN	NaN	120.051	NaN	NaN	NaN	NaN	66.5673	78.706	101.572	92.7181	200.889
	128.784	139.702	NaN	NaN	NaN	NaN	NaN	NaN	NaN	150.134	135.786	NaN	NaN	NaN	NaN	100.63	NaN	NaN	NaN	NaN	NaN	NaN	NaN	19.2776	75.4807	NaN	86.6288	NaN	173.398	88.2188	NaN	NaN	65.9432	NaN	73.418	NaN	NaN	NaN	NaN	120.563	NaN	NaN	NaN	NaN	66.996	79.6886	102.485	88.5309	199.714
	130.096	141.239	NaN	NaN	NaN	NaN	NaN	NaN	NaN	152.606	137.554	NaN	NaN	NaN	NaN	102.5	NaN	NaN	NaN	NaN	NaN	NaN	NaN	20	77.5121	NaN	87.1564	NaN	171.508	88.7026	NaN	NaN	67.0945	NaN	72.3127	NaN	NaN	NaN	NaN	122.11	NaN	NaN	NaN	NaN	68.7098	80.9896	104.204	90.8641	203.485
	131.32	139.923	NaN	NaN	NaN	NaN	NaN	NaN	NaN	152.147	132.893	NaN	NaN	NaN	NaN	101.315	NaN	NaN	NaN	NaN	NaN	NaN	NaN	17.9343	76.4875	NaN	87.4907	NaN	167.219	88.2423	NaN	NaN	65.8849	NaN	67.7292	NaN	NaN	NaN	NaN	122.534	NaN	NaN	NaN	NaN	67.5715	80.5178	103.915	88.0274	202.531
	134.303	140.724	NaN	NaN	NaN	NaN	NaN	NaN	NaN	152.949	136.815	NaN	NaN	NaN	NaN	103.44	NaN	NaN	NaN	NaN	NaN	NaN	NaN	19.521	78.3734	NaN	88.8077	NaN	167.277	86.9556	NaN	NaN	68.552	NaN	63.5391	NaN	NaN	NaN	NaN	125.452	NaN	NaN	NaN	NaN	69.3083	81.4924	107.758	87.6084	204.68
	134.225	138.555	NaN	NaN	NaN	NaN	NaN	NaN	NaN	153.747	136.718	NaN	NaN	NaN	NaN	103.069	NaN	NaN	NaN	NaN	NaN	NaN	NaN	17.904	78.3437	NaN	89.8516	NaN	164.617	87.083	NaN	NaN	67.047	NaN	61.6679	NaN	NaN	NaN	NaN	125.238	NaN	NaN	NaN	NaN	67.4058	80.2642	109.628	85.3195	204.61
	135.437	140.493	NaN	NaN	NaN	NaN	NaN	NaN	NaN	155.628	126.363	NaN	NaN	NaN	NaN	104.701	NaN	NaN	NaN	NaN	NaN	NaN	NaN	18.1968	78.2316	NaN	90.4975	NaN	165.681	88.4607	NaN	NaN	67.7782	NaN	61.6799	NaN	NaN	NaN	NaN	127.282	NaN	NaN	NaN	NaN	68.0142	80.1264	110.987	85.0632	205.028
	135.135	141.887	NaN	NaN	NaN	NaN	NaN	NaN	NaN	154.772	122.847	NaN	NaN	NaN	NaN	106.635	NaN	NaN	NaN	NaN	NaN	NaN	NaN	17.3937	76.467	NaN	89.9273	NaN	165.212	97.5108	NaN	NaN	64.9038	NaN	60.9498	NaN	NaN	NaN	NaN	127.133	NaN	NaN	NaN	NaN	66.3011	78.8541	112.814	81.9592	204.554
	134.995	143.521	NaN	NaN	NaN	NaN	NaN	NaN	NaN	158.019	122.683	NaN	NaN	NaN	NaN	110.316	NaN	NaN	NaN	NaN	NaN	NaN	NaN	12.491	75.0878	NaN	89.8752	NaN	165.95	98.7756	NaN	NaN	63.2462	NaN	65.1778	NaN	NaN	NaN	NaN	129.012	NaN	NaN	NaN	NaN	63.9206	76.5315	116.013	81.3462	203.202
	134.953	141.021	NaN	NaN	NaN	NaN	NaN	NaN	NaN	158.827	120.226	NaN	NaN	NaN	NaN	106.358	NaN	NaN	NaN	NaN	NaN	NaN	NaN	11.2573	72.3386	NaN	88.3011	NaN	163.479	87.0193	NaN	NaN	65.0566	NaN	65.2247	NaN	NaN	NaN	NaN	127.619	NaN	NaN	NaN	NaN	63.2888	73.5523	112.313	80.088	202.774
	135.127	139.524	NaN	NaN	NaN	NaN	NaN	NaN	NaN	161.672	120.762	NaN	NaN	NaN	NaN	107.811	NaN	NaN	NaN	NaN	NaN	NaN	NaN	11.7535	71.5612	NaN	87.6326	NaN	163.364	93.9344	NaN	NaN	67.7716	NaN	66.3839	NaN	NaN	NaN	NaN	129.252	NaN	NaN	NaN	NaN	64.1479	72.8456	113.472	80.4017	203.665
	135.412	141.19	NaN	NaN	NaN	NaN	NaN	NaN	NaN	160.284	121.212	NaN	NaN	NaN	NaN	105.444	NaN	NaN	NaN	NaN	NaN	NaN	NaN	11.2124	69.7755	NaN	85.1018	NaN	159.971	90.6548	NaN	NaN	68.0043	NaN	66.2324	NaN	NaN	NaN	NaN	126.344	NaN	NaN	NaN	NaN	59.8854	69.6844	111.641	77.4837	202.97
	136.211	144.103	NaN	NaN	NaN	NaN	NaN	NaN	NaN	164.18	122.912	NaN	NaN	NaN	NaN	106.774	NaN	NaN	NaN	NaN	NaN	NaN	NaN	11.8852	70.3744	NaN	86.3706	NaN	158.831	98.1432	NaN	NaN	67.9882	NaN	69.4232	NaN	NaN	NaN	NaN	125.469	NaN	NaN	NaN	NaN	60.5983	69.4919	111.44	77.4839	203.964
	136.432	142.163	NaN	NaN	NaN	NaN	NaN	NaN	NaN	161.706	121.533	NaN	NaN	NaN	NaN	104.225	NaN	NaN	NaN	NaN	NaN	NaN	NaN	10.6679	69.4398	NaN	84.782	NaN	157.197	114.311	NaN	NaN	67.44	NaN	68.748	NaN	NaN	NaN	NaN	121.481	NaN	NaN	NaN	NaN	57.9789	66.3555	108.664	76.5233	202.526
	138	146.032	NaN	NaN	NaN	NaN	NaN	NaN	NaN	165.356	123.011	NaN	NaN	NaN	NaN	104.295	NaN	NaN	NaN	NaN	NaN	NaN	NaN	12.9205	70.9661	NaN	86.2543	NaN	156.758	111.728	NaN	NaN	68.2214	NaN	71.1457	NaN	NaN	NaN	NaN	128.435	NaN	NaN	NaN	NaN	58.9871	65.6642	108.277	77.5524	203.475
	137.053	148.578	NaN	NaN	NaN	NaN	NaN	NaN	NaN	165.247	123.22	NaN	NaN	NaN	NaN	99.9203	NaN	NaN	NaN	NaN	NaN	NaN	NaN	11.1383	69.8021	NaN	84.7245	NaN	156.372	92.2946	NaN	NaN	64.7762	NaN	68.4419	NaN	NaN	NaN	NaN	127.798	NaN	NaN	NaN	NaN	57.3164	62.6517	107.77	74.9132	200.597
	139.008	151.053	NaN	NaN	NaN	NaN	NaN	NaN	NaN	167.521	123.759	NaN	NaN	NaN	NaN	101.75	NaN	NaN	NaN	NaN	NaN	NaN	NaN	13.9029	72.4707	NaN	85.9375	NaN	158.241	94.399	NaN	NaN	65.7754	NaN	67.8278	NaN	NaN	NaN	NaN	110.512	NaN	NaN	NaN	NaN	57.3247	61.5194	108.581	75.07	201.468
	137.622	151.706	NaN	NaN	NaN	NaN	NaN	NaN	NaN	169.453	125.383	NaN	NaN	NaN	NaN	99.5002	NaN	NaN	NaN	NaN	NaN	NaN	NaN	14.5277	74.8959	NaN	85.4616	NaN	158.771	106.227	NaN	NaN	63.4823	NaN	72.7653	NaN	NaN	NaN	NaN	123.475	NaN	NaN	NaN	NaN	54.7812	58.8565	108.777	73.7263	200.206
	138.682	153.971	NaN	NaN	NaN	NaN	NaN	NaN	NaN	171.28	128.32	NaN	NaN	NaN	NaN	101.142	NaN	NaN	NaN	NaN	NaN	NaN	NaN	16.1805	70.203	NaN	84.6327	NaN	160.795	113.019	NaN	NaN	62.5623	NaN	77.5165	NaN	NaN	NaN	NaN	102.837	NaN	NaN	NaN	NaN	56.1091	58.6587	112.73	75.3901	200.792
	138.204	155.675	NaN	NaN	NaN	NaN	NaN	NaN	NaN	170.755	129.203	NaN	NaN	NaN	NaN	99.4535	NaN	NaN	NaN	NaN	NaN	NaN	NaN	18.2	70.3841	NaN	82.1878	NaN	160.408	102.011	NaN	NaN	60.2896	NaN	75.3731	NaN	NaN	NaN	NaN	99.2748	NaN	NaN	NaN	NaN	56.6314	57.7711	113.982	74.5748	199.341
	138.892	159.853	NaN	NaN	NaN	NaN	NaN	NaN	NaN	166.384	131.096	NaN	NaN	NaN	NaN	101.292	NaN	NaN	NaN	NaN	NaN	NaN	NaN	22.0955	71.1364	NaN	81.8321	NaN	161.656	93.3468	NaN	NaN	60.3969	NaN	78.6181	NaN	NaN	NaN	NaN	98.9324	NaN	NaN	NaN	NaN	58.6293	59.7348	117.72	76.4774	199.229
	139.406	157.725	NaN	NaN	NaN	NaN	NaN	NaN	NaN	168.487	131.486	NaN	NaN	NaN	NaN	98.2995	NaN	NaN	NaN	NaN	NaN	NaN	NaN	24.7238	73.6833	NaN	81.9916	NaN	161.881	100.313	NaN	NaN	59.4825	NaN	79.4008	NaN	NaN	NaN	NaN	94.9324	NaN	NaN	NaN	NaN	59.8825	59.7239	116.306	76.4576	199.334
	140.022	158.623	NaN	NaN	NaN	NaN	NaN	NaN	NaN	175.543	134.245	NaN	NaN	NaN	NaN	99.423	NaN	NaN	NaN	NaN	NaN	NaN	NaN	27.6159	72.5494	NaN	82.3744	NaN	163.462	85.2061	NaN	NaN	61.0051	NaN	80.3764	NaN	NaN	NaN	NaN	96.5879	NaN	NaN	NaN	NaN	55.4451	61.1029	119.734	80.4169	200.4
	140.026	159.358	NaN	NaN	NaN	NaN	NaN	NaN	NaN	174.168	133.286	NaN	NaN	NaN	NaN	98.655	NaN	NaN	NaN	NaN	NaN	NaN	NaN	29.354	78.4913	NaN	82.1193	NaN	164.187	82.083	NaN	NaN	60.6863	NaN	80.0555	NaN	NaN	NaN	NaN	98.5252	NaN	NaN	NaN	NaN	65.2248	59.9533	118.049	81.1312	200.752
	140.324	160.287	NaN	NaN	NaN	NaN	NaN	NaN	NaN	175.309	133.806	NaN	NaN	NaN	NaN	99.0189	NaN	NaN	NaN	NaN	NaN	NaN	NaN	31.188	82.8924	NaN	82.1195	NaN	168.934	81.1973	NaN	NaN	61.9181	NaN	81.2861	NaN	NaN	NaN	NaN	100.015	NaN	NaN	NaN	NaN	67.7973	60.6469	118.977	75.5261	203.054
	140.413	159.569	NaN	NaN	NaN	NaN	NaN	NaN	NaN	175.873	134.286	NaN	NaN	NaN	NaN	98.867	NaN	NaN	NaN	NaN	NaN	NaN	NaN	31.6534	80.3603	NaN	81.3463	NaN	170.281	96.8299	NaN	NaN	61.5124	NaN	81.2112	NaN	NaN	NaN	NaN	100.451	NaN	NaN	NaN	NaN	66.6099	57.3118	117.061	85.8267	200.607
	140.763	161.442	NaN	NaN	NaN	NaN	NaN	NaN	NaN	178.183	135.735	NaN	NaN	NaN	NaN	99.2391	NaN	NaN	NaN	NaN	NaN	NaN	NaN	35.8394	73.1164	NaN	81.8716	NaN	172.727	75.3347	NaN	NaN	61.6922	NaN	83.9043	NaN	NaN	NaN	NaN	102.956	NaN	NaN	NaN	NaN	66.9634	59.1893	116.441	89.8299	202.664
	141.28	159.102	NaN	NaN	NaN	NaN	NaN	NaN	NaN	179.139	135.36	NaN	NaN	NaN	NaN	96.8753	NaN	NaN	NaN	NaN	NaN	NaN	NaN	37.9476	75.5203	NaN	82.4306	NaN	173.129	53.8395	NaN	NaN	61.732	NaN	82.6802	NaN	NaN	NaN	NaN	104.04	NaN	NaN	NaN	NaN	65.4118	57.4291	115.691	88.6635	202.093
	141.746	161.325	NaN	NaN	NaN	NaN	NaN	NaN	NaN	180.576	138.364	NaN	NaN	NaN	NaN	100.901	NaN	NaN	NaN	NaN	NaN	NaN	NaN	30.271	79.4101	NaN	82.8386	NaN	177.572	58.4368	NaN	NaN	63.1737	NaN	87.5227	NaN	NaN	NaN	NaN	106.816	NaN	NaN	NaN	NaN	64.1582	58.2134	117.52	90.8619	203.805
	141.67	156.592	NaN	NaN	NaN	NaN	NaN	NaN	NaN	180.693	139.615	NaN	NaN	NaN	NaN	100.483	NaN	NaN	NaN	NaN	NaN	NaN	NaN	41.7687	77.0018	NaN	81.7352	NaN	175.408	68.8202	NaN	NaN	62.6359	NaN	86.1298	NaN	NaN	NaN	NaN	106.384	NaN	NaN	NaN	NaN	61.5641	58.3911	117.254	86.4276	204.771
	142.148	156.126	NaN	NaN	NaN	NaN	NaN	NaN	NaN	182.22	141.4	NaN	NaN	NaN	NaN	104.954	NaN	NaN	NaN	NaN	NaN	NaN	NaN	46.4866	77.5519	NaN	81.8254	NaN	176.399	79.2036	NaN	NaN	64.7258	NaN	86.1929	NaN	NaN	NaN	NaN	109.132	NaN	NaN	NaN	NaN	60.7024	59.925	119.053	87.8283	206.085
	141.288	160.272	NaN	NaN	NaN	NaN	NaN	NaN	NaN	178.661	140.599	NaN	NaN	NaN	NaN	100.54	NaN	NaN	NaN	NaN	NaN	NaN	NaN	44.5174	74.3184	NaN	81.8231	NaN	175.432	78.4003	NaN	NaN	64.0152	NaN	83.243	NaN	NaN	NaN	NaN	109.577	NaN	NaN	NaN	NaN	58.4618	59.4704	118.281	88.5632	207.74
	141.519	148.637	NaN	NaN	NaN	NaN	NaN	NaN	NaN	179.857	141.876	NaN	NaN	NaN	NaN	100.701	NaN	NaN	NaN	NaN	NaN	NaN	NaN	43.6238	77.4652	NaN	82.0606	NaN	174.49	56.1382	NaN	NaN	65.3357	NaN	86.7596	NaN	NaN	NaN	NaN	112.312	NaN	NaN	NaN	NaN	58.6626	62.4506	118.727	91.4568	210.269
	140.504	146.067	NaN	NaN	NaN	NaN	NaN	NaN	NaN	177.47	142.494	NaN	NaN	NaN	NaN	99.0843	NaN	NaN	NaN	NaN	NaN	NaN	NaN	39.396	78.2059	NaN	81.118	NaN	172.026	57.3582	NaN	NaN	64.6017	NaN	83.5321	NaN	NaN	NaN	NaN	112.819	NaN	NaN	NaN	NaN	55.7113	62.0658	116.331	90.2598	210.628
	140.345	146.308	NaN	NaN	NaN	NaN	NaN	NaN	NaN	181.089	142.79	NaN	NaN	NaN	NaN	98.5773	NaN	NaN	NaN	NaN	NaN	NaN	NaN	39.8957	83.889	NaN	82.2051	NaN	171.597	60.6467	NaN	NaN	65.8389	NaN	80.474	NaN	NaN	NaN	NaN	115.246	NaN	NaN	NaN	NaN	58.628	64.1264	119.578	89.5351	211.846
	138.339	145.346	NaN	NaN	NaN	NaN	NaN	NaN	NaN	181.27	143.062	NaN	NaN	NaN	NaN	96.6593	NaN	NaN	NaN	NaN	NaN	NaN	NaN	34.9795	83.4955	NaN	81.9313	NaN	170.296	56.9772	NaN	NaN	65.4291	NaN	84.718	NaN	NaN	NaN	NaN	116.345	NaN	NaN	NaN	NaN	55.7656	64.7501	117.152	87.1947	211.303
	137.523	146.002	NaN	NaN	NaN	NaN	NaN	NaN	NaN	185.032	143.859	NaN	NaN	NaN	NaN	97.4632	NaN	NaN	NaN	NaN	NaN	NaN	NaN	35.0819	83.3338	NaN	81.4519	NaN	169.744	60.1463	NaN	NaN	65.915	NaN	74.2349	NaN	NaN	NaN	NaN	120.032	NaN	NaN	NaN	NaN	56.8879	66.7225	119.567	86.7982	212.492
	136.834	147.563	NaN	NaN	NaN	NaN	NaN	NaN	NaN	186.873	148.102	NaN	NaN	NaN	NaN	97.892	NaN	NaN	NaN	NaN	NaN	NaN	NaN	34.3879	82.1406	NaN	81.2029	NaN	168.937	58.8336	NaN	NaN	66.4427	NaN	70.4108	NaN	NaN	NaN	NaN	118.878	NaN	NaN	NaN	NaN	57.9342	70.5705	120.729	85.4007	213.727
	136.259	148.728	NaN	NaN	NaN	NaN	NaN	NaN	NaN	189.466	148.322	NaN	NaN	NaN	NaN	95.4326	NaN	NaN	NaN	NaN	NaN	NaN	NaN	32.8222	81.0475	NaN	79.0359	NaN	168.687	59.6648	NaN	NaN	68.1917	NaN	69.2689	NaN	NaN	NaN	NaN	119.183	NaN	NaN	NaN	NaN	59.5516	73.1165	123.169	86.7163	215.028
	136.095	146.335	NaN	NaN	NaN	NaN	NaN	NaN	NaN	189.308	146.984	NaN	NaN	NaN	NaN	97.6183	NaN	NaN	NaN	NaN	NaN	NaN	NaN	34.0943	83.6922	NaN	79.4289	NaN	166.205	56.5651	NaN	NaN	67.4407	NaN	64.3911	NaN	NaN	NaN	NaN	118.661	NaN	NaN	NaN	NaN	58.6159	73.2118	121.5	84.6336	215.001
	136.783	147.036	NaN	NaN	NaN	NaN	NaN	NaN	NaN	191.068	148.527	NaN	NaN	NaN	NaN	80.7911	NaN	NaN	NaN	NaN	NaN	NaN	NaN	35.5581	81.6136	NaN	81.2323	NaN	165.854	55.5142	NaN	NaN	69.1606	NaN	63.6481	NaN	NaN	NaN	NaN	120.79	NaN	NaN	NaN	NaN	60.3589	72.5132	123.488	85.2252	216.981
	135.965	144.399	NaN	NaN	NaN	NaN	NaN	NaN	NaN	190.321	146.884	NaN	NaN	NaN	NaN	97.6776	NaN	NaN	NaN	NaN	NaN	NaN	NaN	34.8886	78.9245	NaN	78.889	NaN	164.612	59.49	NaN	NaN	69.3599	NaN	61.6178	NaN	NaN	NaN	NaN	121.002	NaN	NaN	NaN	NaN	58.824	68.6465	122.834	82.0607	216.039
	136.397	143.34	NaN	NaN	NaN	NaN	NaN	NaN	NaN	185.423	147.998	NaN	NaN	NaN	NaN	75.0558	NaN	NaN	NaN	NaN	NaN	NaN	NaN	35.7519	78.3159	NaN	79.5861	NaN	164.08	73.4572	NaN	NaN	71.1372	NaN	60.7318	NaN	NaN	NaN	NaN	122.432	NaN	NaN	NaN	NaN	58.2677	64.4039	123.673	84.0598	217.583
	135.382	142.195	NaN	NaN	NaN	NaN	NaN	NaN	NaN	189.495	147.274	NaN	NaN	NaN	NaN	70.8915	NaN	NaN	NaN	NaN	NaN	NaN	NaN	31.7421	77.2263	NaN	77.2829	NaN	163.476	71.8638	NaN	NaN	70.409	NaN	60.0688	NaN	NaN	NaN	NaN	121.015	NaN	NaN	NaN	NaN	59.0837	73.1642	122.916	81.5057	216.077
	134.426	143.35	NaN	NaN	NaN	NaN	NaN	NaN	NaN	191.778	147.054	NaN	NaN	NaN	NaN	70.5211	NaN	NaN	NaN	NaN	NaN	NaN	NaN	34.1264	78.4468	NaN	77.8145	NaN	166.106	56.0396	NaN	NaN	72.1728	NaN	61.6245	NaN	NaN	NaN	NaN	119.47	NaN	NaN	NaN	NaN	53.6935	57.1297	122.522	83.5789	216.696
	130.861	144.045	NaN	NaN	NaN	NaN	NaN	NaN	NaN	193.378	147.293	NaN	NaN	NaN	NaN	68.965	NaN	NaN	NaN	NaN	NaN	NaN	NaN	32.1429	76.6917	NaN	76.9673	NaN	165.75	57.5021	NaN	NaN	70.4904	NaN	63.2429	NaN	NaN	NaN	NaN	116.154	NaN	NaN	NaN	NaN	59.5915	52.6683	123.909	80.7028	212.26
	130.866	145.69	NaN	NaN	NaN	NaN	NaN	NaN	NaN	196.384	149.042	NaN	NaN	NaN	NaN	70.5835	NaN	NaN	NaN	NaN	NaN	NaN	NaN	35.5551	79.9861	NaN	77.4135	NaN	168.329	68.8251	NaN	NaN	71.3038	NaN	67.9739	NaN	NaN	NaN	NaN	113.69	NaN	NaN	NaN	NaN	49.034	52.016	124.722	81.7158	213.731
	129.364	146.586	NaN	NaN	NaN	NaN	NaN	NaN	NaN	194.201	148.379	NaN	NaN	NaN	NaN	68.8717	NaN	NaN	NaN	NaN	NaN	NaN	NaN	34.6754	81.5271	NaN	75.8021	NaN	167.145	68.5865	NaN	NaN	70.4142	NaN	66.439	NaN	NaN	NaN	NaN	109.814	NaN	NaN	NaN	NaN	45.7428	49.368	122.399	80.4988	214.243
	129.179	149.669	NaN	NaN	NaN	NaN	NaN	NaN	NaN	197.076	149.6	NaN	NaN	NaN	NaN	72.454	NaN	NaN	NaN	NaN	NaN	NaN	NaN	39.5412	77.8365	NaN	77.038	NaN	167.499	63.9517	NaN	NaN	72.3903	NaN	60.8466	NaN	NaN	NaN	NaN	109.121	NaN	NaN	NaN	NaN	48.5433	49.9186	121.986	82.5122	214.392
	127.113	149.546	NaN	NaN	NaN	NaN	NaN	NaN	NaN	192.617	149.457	NaN	NaN	NaN	NaN	72.1272	NaN	NaN	NaN	NaN	NaN	NaN	NaN	39.0483	71.7005	NaN	75.8813	NaN	167.653	56.7709	NaN	NaN	68.7141	NaN	70.4605	NaN	NaN	NaN	NaN	107.399	NaN	NaN	NaN	NaN	49.1152	48.3447	118.417	82.0894	214.478
	127.101	151.182	NaN	NaN	NaN	NaN	NaN	NaN	NaN	194.936	150.082	NaN	NaN	NaN	NaN	73.5482	NaN	NaN	NaN	NaN	NaN	NaN	NaN	33.849	76.6052	NaN	77.471	NaN	168.345	63.1636	NaN	NaN	70.7365	NaN	74.5669	NaN	NaN	NaN	NaN	107.655	NaN	NaN	NaN	NaN	52.9984	49.4714	120.837	83.3536	212.995
	125.993	153.052	NaN	NaN	NaN	NaN	NaN	NaN	NaN	192.901	146.921	NaN	NaN	NaN	NaN	72.8156	NaN	NaN	NaN	NaN	NaN	NaN	NaN	43.4235	73.6888	NaN	76.0945	NaN	166.971	68.7058	NaN	NaN	68.605	NaN	73.0617	NaN	NaN	NaN	NaN	107.59	NaN	NaN	NaN	NaN	50.7485	49.0523	116.31	80.1679	213.987
	127.666	156.837	NaN	NaN	NaN	NaN	NaN	NaN	NaN	194.964	149.433	NaN	NaN	NaN	NaN	77.5357	NaN	NaN	NaN	NaN	NaN	NaN	NaN	46.2266	75.0138	NaN	76.1179	NaN	168.479	66.2691	NaN	NaN	68.3247	NaN	77.9318	NaN	NaN	NaN	NaN	108.248	NaN	NaN	NaN	NaN	53.7217	50.3514	118.071	82.9039	220.452
	127.039	156.436	NaN	NaN	NaN	NaN	NaN	NaN	NaN	193.707	147.342	NaN	NaN	NaN	NaN	79.4978	NaN	NaN	NaN	NaN	NaN	NaN	NaN	46.572	74.7685	NaN	75.3562	NaN	169.198	58.6561	NaN	NaN	67.6047	NaN	77.45	NaN	NaN	NaN	NaN	108.055	NaN	NaN	NaN	NaN	53.3494	50.4653	116.413	79.9881	214.435
	128.122	150.364	NaN	NaN	NaN	NaN	NaN	NaN	NaN	196.785	148.638	NaN	NaN	NaN	NaN	83.9309	NaN	NaN	NaN	NaN	NaN	NaN	NaN	49.8981	74.1529	NaN	76.2427	NaN	171.022	59.9672	NaN	NaN	67.9434	NaN	78.7492	NaN	NaN	NaN	NaN	111.839	NaN	NaN	NaN	NaN	54.047	51.5676	117.154	80.6748	213.737
	128.133	161.191	NaN	NaN	NaN	NaN	NaN	NaN	NaN	195.643	149.654	NaN	NaN	NaN	NaN	83.3792	NaN	NaN	NaN	NaN	NaN	NaN	NaN	54.5425	77.2135	NaN	75.9047	NaN	169.852	65.9347	NaN	NaN	68.6423	NaN	79.6987	NaN	NaN	NaN	NaN	112.297	NaN	NaN	NaN	NaN	52.6575	51.8048	114.423	78.0707	217.158
	130.476	165.655	NaN	NaN	NaN	NaN	NaN	NaN	NaN	198.412	150.497	NaN	NaN	NaN	NaN	87.2628	NaN	NaN	NaN	NaN	NaN	NaN	NaN	57.4021	79.4325	NaN	75.8802	NaN	171.446	67.4874	NaN	NaN	69.7713	NaN	82.545	NaN	NaN	NaN	NaN	115.716	NaN	NaN	NaN	NaN	52.9577	52.9687	117.691	79.6202	220.433
	131.875	162.718	NaN	NaN	NaN	NaN	NaN	NaN	NaN	197.522	148.396	NaN	NaN	NaN	NaN	78.5168	NaN	NaN	NaN	NaN	NaN	NaN	NaN	56.0991	77.4535	NaN	75.8006	NaN	169.837	72.2961	NaN	NaN	69.0444	NaN	79.8785	NaN	NaN	NaN	NaN	112.434	NaN	NaN	NaN	NaN	52.5473	53.6056	113.819	77.8561	218.828
	134.306	163.23	NaN	NaN	NaN	NaN	NaN	NaN	NaN	199.889	149.969	NaN	NaN	NaN	NaN	80.2938	NaN	NaN	NaN	NaN	NaN	NaN	NaN	58.7011	80.4235	NaN	76.1806	NaN	170.828	73.3084	NaN	NaN	67.774	NaN	83.4176	NaN	NaN	NaN	NaN	116.675	NaN	NaN	NaN	NaN	54.5869	55.3199	113.968	79.4153	220.217
	134.991	158.45	NaN	NaN	NaN	NaN	NaN	NaN	NaN	199.555	148.788	NaN	NaN	NaN	NaN	77.1634	NaN	NaN	NaN	NaN	NaN	NaN	NaN	57.4238	76.0372	NaN	75.7484	NaN	169.769	70.7955	NaN	NaN	75.2111	NaN	82.0653	NaN	NaN	NaN	NaN	117.787	NaN	NaN	NaN	NaN	54.8813	54.6407	111.783	78.3108	219.701
	136.874	158.295	NaN	NaN	NaN	NaN	NaN	NaN	NaN	201.057	149.867	NaN	NaN	NaN	NaN	76.6089	NaN	NaN	NaN	NaN	NaN	NaN	NaN	58.3956	78.0346	NaN	76.7795	NaN	169.974	71.7172	NaN	NaN	78.0986	NaN	80.7933	NaN	NaN	NaN	NaN	120.652	NaN	NaN	NaN	NaN	57.2013	56.608	112.039	80.9797	220.431
	137.03	156.422	NaN	NaN	NaN	NaN	NaN	NaN	NaN	197.323	148.174	NaN	NaN	NaN	NaN	74.3353	NaN	NaN	NaN	NaN	NaN	NaN	NaN	54.5443	77.2723	NaN	77.0305	NaN	172.092	68.6934	NaN	NaN	78.7321	NaN	79.6497	NaN	NaN	NaN	NaN	121.831	NaN	NaN	NaN	NaN	56.2551	57.299	109.561	76.9646	219.631
	138.121	156.948	NaN	NaN	NaN	NaN	NaN	NaN	NaN	197.35	147.625	NaN	NaN	NaN	NaN	74.163	NaN	NaN	NaN	NaN	NaN	NaN	NaN	55.8328	77.2493	NaN	77.7165	NaN	172.039	72.8023	NaN	NaN	78.9969	NaN	78.631	NaN	NaN	NaN	NaN	124.437	NaN	NaN	NaN	NaN	59.8961	58.6392	109.111	81.4184	219.523
	137.876	155.667	NaN	NaN	NaN	NaN	NaN	NaN	NaN	198.466	145.137	NaN	NaN	NaN	NaN	73.9567	NaN	NaN	NaN	NaN	NaN	NaN	NaN	53.8442	76.5326	NaN	77.473	NaN	171.457	72.052	NaN	NaN	74.6718	NaN	76.9475	NaN	NaN	NaN	NaN	122.945	NaN	NaN	NaN	NaN	60.0199	59.2173	108.393	80.3625	219.07
	139.007	156.171	NaN	NaN	NaN	NaN	NaN	NaN	NaN	199.947	146.31	NaN	NaN	NaN	NaN	75.3295	NaN	NaN	NaN	NaN	NaN	NaN	NaN	51.5255	76.457	NaN	78.5856	NaN	173.774	69.3675	NaN	NaN	73.4516	NaN	76.0544	NaN	NaN	NaN	NaN	126.705	NaN	NaN	NaN	NaN	63.9062	61.5918	106.083	82.9282	220.91
	138.766	153.916	NaN	NaN	NaN	NaN	NaN	NaN	NaN	201.266	144.541	NaN	NaN	NaN	NaN	74.0766	NaN	NaN	NaN	NaN	NaN	NaN	NaN	52.3356	75.3165	NaN	78.0166	NaN	174.046	64.5128	NaN	NaN	78.4154	NaN	73.3688	NaN	NaN	NaN	NaN	125.447	NaN	NaN	NaN	NaN	62.2023	61.9267	104.184	82.1675	218.787
	139.189	155.226	NaN	NaN	NaN	NaN	NaN	NaN	NaN	201.104	147.508	NaN	NaN	NaN	NaN	75.592	NaN	NaN	NaN	NaN	NaN	NaN	NaN	53.9148	77.0781	NaN	78.7612	NaN	175.596	63.9447	NaN	NaN	66.0994	NaN	75.0289	NaN	NaN	NaN	NaN	127.244	NaN	NaN	NaN	NaN	65.2315	63.966	105.115	82.8432	219.459
	140.507	152.363	NaN	NaN	NaN	NaN	NaN	NaN	NaN	199.558	150.876	NaN	NaN	NaN	NaN	73.9302	NaN	NaN	NaN	NaN	NaN	NaN	NaN	53.1614	75.5546	NaN	79.3322	NaN	175.186	62.3247	NaN	NaN	63.938	NaN	74.2444	NaN	NaN	NaN	NaN	127.037	NaN	NaN	NaN	NaN	68.9057	64.3599	101.481	82.526	219.296
	141.577	154.679	NaN	NaN	NaN	NaN	NaN	NaN	NaN	195.004	145.723	NaN	NaN	NaN	NaN	73.9943	NaN	NaN	NaN	NaN	NaN	NaN	NaN	55.4675	76.4948	NaN	78.5407	NaN	170.196	63.2257	NaN	NaN	61.0771	NaN	74.0907	NaN	NaN	NaN	NaN	126.515	NaN	NaN	NaN	NaN	71.1813	63.0895	98.7461	82.0923	219.99
	141.062	152.542	NaN	NaN	NaN	NaN	NaN	NaN	NaN	192.013	145.425	NaN	NaN	NaN	NaN	73.437	NaN	NaN	NaN	NaN	NaN	NaN	NaN	51.9306	84.5511	NaN	75.376	NaN	169.341	61.6955	NaN	NaN	75.9335	NaN	71.9601	NaN	NaN	NaN	NaN	126.745	NaN	NaN	NaN	NaN	70.6638	60.8294	96.2294	79.3162	228.372
	141.817	154.318	NaN	NaN	NaN	NaN	NaN	NaN	NaN	201.185	149.214	NaN	NaN	NaN	NaN	73.9219	NaN	NaN	NaN	NaN	NaN	NaN	NaN	51.9155	84.6376	NaN	74.9857	NaN	168.119	62.1869	NaN	NaN	49.3434	NaN	74.5337	NaN	NaN	NaN	NaN	127.615	NaN	NaN	NaN	NaN	70.5604	60.2061	95.0324	83.0847	219.123
	141.18	153.807	NaN	NaN	NaN	NaN	NaN	NaN	NaN	196.904	147.35	NaN	NaN	NaN	NaN	74.0229	NaN	NaN	NaN	NaN	NaN	NaN	NaN	51.6153	84.7455	NaN	72.8271	NaN	167.313	62.6416	NaN	NaN	65.0187	NaN	71.9745	NaN	NaN	NaN	NaN	126.801	NaN	NaN	NaN	NaN	69.3314	58.518	94.4803	81.4981	229.726
	141.049	156.425	NaN	NaN	NaN	NaN	NaN	NaN	NaN	200.703	147.795	NaN	NaN	NaN	NaN	74.845	NaN	NaN	NaN	NaN	NaN	NaN	NaN	51.6053	83.9084	NaN	72.3288	NaN	168.171	64.4192	NaN	NaN	43.5853	NaN	75.8901	NaN	NaN	NaN	NaN	128.121	NaN	NaN	NaN	NaN	69.2277	58.0282	95.2447	81.8487	228.798
	140.324	156.687	NaN	NaN	NaN	NaN	NaN	NaN	NaN	202.138	146.688	NaN	NaN	NaN	NaN	75.4381	NaN	NaN	NaN	NaN	NaN	NaN	NaN	54.3179	80.5229	NaN	70.4392	NaN	163.612	63.508	NaN	NaN	68.5053	NaN	77.0782	NaN	NaN	NaN	NaN	126.967	NaN	NaN	NaN	NaN	66.2488	55.6349	95.5288	81.5454	227.579
	139.843	160.101	NaN	NaN	NaN	NaN	NaN	NaN	NaN	204.596	149.081	NaN	NaN	NaN	NaN	78.3618	NaN	NaN	NaN	NaN	NaN	NaN	NaN	54.4445	73.7613	NaN	70.8976	NaN	164.717	61.9412	NaN	NaN	39.0296	NaN	81.4359	NaN	NaN	NaN	NaN	128.361	NaN	NaN	NaN	NaN	65.7097	55.3335	96.6471	82.1	230.09
	140.958	158.841	NaN	NaN	NaN	NaN	NaN	NaN	NaN	204.06	150.278	NaN	NaN	NaN	NaN	76.5227	NaN	NaN	NaN	NaN	NaN	NaN	NaN	58.9816	73.6524	NaN	69.0275	NaN	162.532	62.4143	NaN	NaN	34.8772	NaN	82.0635	NaN	NaN	NaN	NaN	127.775	NaN	NaN	NaN	NaN	62.4556	54.8004	95.8134	82.4743	229.09
	140.302	160.881	NaN	NaN	NaN	NaN	NaN	NaN	NaN	206.941	151.319	NaN	NaN	NaN	NaN	77.9156	NaN	NaN	NaN	NaN	NaN	NaN	NaN	61.6313	84.327	NaN	69.1942	NaN	161.912	69.4038	NaN	NaN	38.5328	NaN	84.6138	NaN	NaN	NaN	NaN	130.505	NaN	NaN	NaN	NaN	61.5388	55.3655	96.5975	82.8781	229.951
	138.751	160.88	NaN	NaN	NaN	NaN	NaN	NaN	NaN	208.009	152.541	NaN	NaN	NaN	NaN	75.3325	NaN	NaN	NaN	NaN	NaN	NaN	NaN	62.3805	79.1418	NaN	66.1657	NaN	159.525	68.9805	NaN	NaN	56.0453	NaN	82.3547	NaN	NaN	NaN	NaN	130.915	NaN	NaN	NaN	NaN	58.4336	54.3943	95.2282	84.9062	228.032
	139.564	162.812	NaN	NaN	NaN	NaN	NaN	NaN	NaN	209.621	153.979	NaN	NaN	NaN	NaN	77.432	NaN	NaN	NaN	NaN	NaN	NaN	NaN	65.1691	78.0625	NaN	66.147	NaN	159.096	73.5075	NaN	NaN	31.9208	NaN	86.7804	NaN	NaN	NaN	NaN	134.466	NaN	NaN	NaN	NaN	58.0422	53.8326	95.2421	86.5741	230.536
	139.732	163.925	NaN	NaN	NaN	NaN	NaN	NaN	NaN	206.13	155.123	NaN	NaN	NaN	NaN	76.7012	NaN	NaN	NaN	NaN	NaN	NaN	NaN	64.9626	79.4752	NaN	63.2739	NaN	157.672	73.3714	NaN	NaN	36.9534	NaN	86.1234	NaN	NaN	NaN	NaN	135.653	NaN	NaN	NaN	NaN	56.528	52.5554	92.9356	87.5427	228.235
	139.966	165.745	NaN	NaN	NaN	NaN	NaN	NaN	NaN	209.178	156.09	NaN	NaN	NaN	NaN	77.2192	NaN	NaN	NaN	NaN	NaN	NaN	NaN	65.2352	81.4634	NaN	63.3899	NaN	158.205	77.7119	NaN	NaN	27.313	NaN	87.6668	NaN	NaN	NaN	NaN	139.024	NaN	NaN	NaN	NaN	55.7147	51.5852	92.9566	89.3343	230.544
	139.169	165.041	NaN	NaN	NaN	NaN	NaN	NaN	NaN	211.066	157.235	NaN	NaN	NaN	NaN	82.1345	NaN	NaN	NaN	NaN	NaN	NaN	NaN	64.6586	81.7344	NaN	60.7377	NaN	160.244	77.031	NaN	NaN	26.812	NaN	86.1012	NaN	NaN	NaN	NaN	139.943	NaN	NaN	NaN	NaN	53.4286	51.3122	91.3418	88.8193	225.651
	140.083	161.846	NaN	NaN	NaN	NaN	NaN	NaN	NaN	213.365	159.015	NaN	NaN	NaN	NaN	76.3823	NaN	NaN	NaN	NaN	NaN	NaN	NaN	64.8406	78.6022	NaN	60.9651	NaN	160.404	80.656	NaN	NaN	26.4288	NaN	90.0944	NaN	NaN	NaN	NaN	132.69	NaN	NaN	NaN	NaN	53.8275	52.5122	93.2528	90.217	227.009
	140.561	169.583	NaN	NaN	NaN	NaN	NaN	NaN	NaN	213.415	159.199	NaN	NaN	NaN	NaN	85.4798	NaN	NaN	NaN	NaN	NaN	NaN	NaN	65.2568	81.1645	NaN	60.3224	NaN	160.292	78.8766	NaN	NaN	25.2119	NaN	92.0613	NaN	NaN	NaN	NaN	144.53	NaN	NaN	NaN	NaN	50.8679	52.9872	90.6137	88.2811	225.35
	142.257	164.835	NaN	NaN	NaN	NaN	NaN	NaN	NaN	216.683	161.396	NaN	NaN	NaN	NaN	89.8531	NaN	NaN	NaN	NaN	NaN	NaN	NaN	65.8809	83.8638	NaN	61.1916	NaN	162.317	75.5417	NaN	NaN	25.8968	NaN	94.8235	NaN	NaN	NaN	NaN	147.316	NaN	NaN	NaN	NaN	51.514	54.7258	91.7917	87.2934	229.185
	142.331	165.393	NaN	NaN	NaN	NaN	NaN	NaN	NaN	214.463	161.487	NaN	NaN	NaN	NaN	87.6433	NaN	NaN	NaN	NaN	NaN	NaN	NaN	66.6512	82.1584	NaN	62.1848	NaN	163.079	77.3715	NaN	NaN	23.6355	NaN	94.1377	NaN	NaN	NaN	NaN	147.166	NaN	NaN	NaN	NaN	49.8839	55.3753	88.8616	86.041	228.098
	144.721	170.816	NaN	NaN	NaN	NaN	NaN	NaN	NaN	216.023	165.568	NaN	NaN	NaN	NaN	89.6605	NaN	NaN	NaN	NaN	NaN	NaN	NaN	67.4661	83.4021	NaN	64.8077	NaN	164.287	78.5676	NaN	NaN	26.6204	NaN	97.9997	NaN	NaN	NaN	NaN	150.397	NaN	NaN	NaN	NaN	51.8749	57.3714	90.933	85.8641	226.33
	145.433	166.442	NaN	NaN	NaN	NaN	NaN	NaN	NaN	214.953	162.26	NaN	NaN	NaN	NaN	88.9801	NaN	NaN	NaN	NaN	NaN	NaN	NaN	63.8101	82.2152	NaN	65.8307	NaN	163.975	73.6221	NaN	NaN	25.8203	NaN	91.0778	NaN	NaN	NaN	NaN	150.751	NaN	NaN	NaN	NaN	48.6498	57.2808	89.8497	83.6173	226.18
	147.334	164.856	NaN	NaN	NaN	NaN	NaN	NaN	NaN	216.303	164.464	NaN	NaN	NaN	NaN	88.7553	NaN	NaN	NaN	NaN	NaN	NaN	NaN	67.6428	82.9673	NaN	68.2007	NaN	166.17	74.4928	NaN	NaN	26.4351	NaN	93.4424	NaN	NaN	NaN	NaN	154.916	NaN	NaN	NaN	NaN	51.668	57.6678	90.0787	85.0638	227.268
	147.183	165.114	NaN	NaN	NaN	NaN	NaN	NaN	NaN	217.423	162.785	NaN	NaN	NaN	NaN	87.8102	NaN	NaN	NaN	NaN	NaN	NaN	NaN	66.6434	83.0111	NaN	69.6692	NaN	166.626	69.9822	NaN	NaN	23.5556	NaN	95.6747	NaN	NaN	NaN	NaN	155.159	NaN	NaN	NaN	NaN	48.8614	57.5797	90.2643	82.3077	228.687
	149.536	160.135	NaN	NaN	NaN	NaN	NaN	NaN	NaN	217.339	162.566	NaN	NaN	NaN	NaN	89.1096	NaN	NaN	NaN	NaN	NaN	NaN	NaN	66.3656	80.4302	NaN	73.4378	NaN	168.308	71.6051	NaN	NaN	23.8986	NaN	97.33	NaN	NaN	NaN	NaN	159.704	NaN	NaN	NaN	NaN	50.7179	58.1419	91.0234	83.6292	227.214
	149.412	168.629	NaN	NaN	NaN	NaN	NaN	NaN	NaN	218.481	160.834	NaN	NaN	NaN	NaN	85.0072	NaN	NaN	NaN	NaN	NaN	NaN	NaN	65.3743	80.1065	NaN	72.2215	NaN	172.084	68.1238	NaN	NaN	22.6431	NaN	95.5812	NaN	NaN	NaN	NaN	158.248	NaN	NaN	NaN	NaN	47.1177	59.204	91.4247	83.004	226.255
	150.597	165.649	NaN	NaN	NaN	NaN	NaN	NaN	NaN	218.992	160.713	NaN	NaN	NaN	NaN	85.2285	NaN	NaN	NaN	NaN	NaN	NaN	NaN	65.7572	83.3359	NaN	75.287	NaN	172.719	70.4671	NaN	NaN	25.7021	NaN	100.251	NaN	NaN	NaN	NaN	161.651	NaN	NaN	NaN	NaN	50.6881	61.1035	94.624	82.071	226.724
	150.508	164.985	NaN	NaN	NaN	NaN	NaN	NaN	NaN	215.458	159.119	NaN	NaN	NaN	NaN	80.9436	NaN	NaN	NaN	NaN	NaN	NaN	NaN	64.5487	81.6607	NaN	71.4499	NaN	172.938	69.452	NaN	NaN	24.3449	NaN	103.518	NaN	NaN	NaN	NaN	159.538	NaN	NaN	NaN	NaN	49.3605	60.9792	94.5102	80.251	227.977
	150.654	162.624	NaN	NaN	NaN	NaN	NaN	NaN	NaN	217.58	159.495	NaN	NaN	NaN	NaN	81.7895	NaN	NaN	NaN	NaN	NaN	NaN	NaN	67.328	83.7941	NaN	75.4791	NaN	176.723	70.3234	NaN	NaN	27.4846	NaN	105.436	NaN	NaN	NaN	NaN	160.682	NaN	NaN	NaN	NaN	51.2951	62.5841	95.3302	79.3038	232.939
	147.648	164.382	NaN	NaN	NaN	NaN	NaN	NaN	NaN	213.974	157.419	NaN	NaN	NaN	NaN	78.5452	NaN	NaN	NaN	NaN	NaN	NaN	NaN	66.1574	83.6446	NaN	75.9983	NaN	174.845	69.3646	NaN	NaN	28.2367	NaN	105.849	NaN	NaN	NaN	NaN	160.182	NaN	NaN	NaN	NaN	50.8687	63.6283	93.4859	78.0475	229.48
	146.299	138.397	NaN	NaN	NaN	NaN	NaN	NaN	NaN	217.956	158.604	NaN	NaN	NaN	NaN	78.2164	NaN	NaN	NaN	NaN	NaN	NaN	NaN	66.9522	84.4445	NaN	79.0741	NaN	175.176	70.106	NaN	NaN	30.517	NaN	106.375	NaN	NaN	NaN	NaN	160.797	NaN	NaN	NaN	NaN	54.5324	64.236	92.9889	77.2171	226.489
	144.077	135.009	NaN	NaN	NaN	NaN	NaN	NaN	NaN	215.067	156.477	NaN	NaN	NaN	NaN	75.6723	NaN	NaN	NaN	NaN	NaN	NaN	NaN	65.9582	82.7156	NaN	77.9167	NaN	172.446	74.227	NaN	NaN	30.2348	NaN	105.793	NaN	NaN	NaN	NaN	162.176	NaN	NaN	NaN	NaN	53.6245	63.8911	90.8685	75.1902	237.024
	140.571	133.202	NaN	NaN	NaN	NaN	NaN	NaN	NaN	211.509	156.052	NaN	NaN	NaN	NaN	72.2923	NaN	NaN	NaN	NaN	NaN	NaN	NaN	61.3741	82.7274	NaN	75.7911	NaN	173.004	75.8804	NaN	NaN	27.5468	NaN	104.477	NaN	NaN	NaN	NaN	163.12	NaN	NaN	NaN	NaN	54.8882	61.574	94.9202	76.3435	235.996
	139	131.539	NaN	NaN	NaN	NaN	NaN	NaN	NaN	211.307	153.203	NaN	NaN	NaN	NaN	67.3313	NaN	NaN	NaN	NaN	NaN	NaN	NaN	66.7427	73.0644	NaN	70.8538	NaN	171.62	78.2165	NaN	NaN	26.6377	NaN	101.003	NaN	NaN	NaN	NaN	162.158	NaN	NaN	NaN	NaN	52.4646	58.2313	83.5668	78.6756	231.21
	138.679	151.389	NaN	NaN	NaN	NaN	NaN	NaN	NaN	214.067	153.648	NaN	NaN	NaN	NaN	69.6068	NaN	NaN	NaN	NaN	NaN	NaN	NaN	49.0923	73.2894	NaN	70.5379	NaN	171.997	79.6535	NaN	NaN	27.5968	NaN	103.219	NaN	NaN	NaN	NaN	163.989	NaN	NaN	NaN	NaN	54.1634	56.1638	83.6629	70.551	227.985
	137.446	136.703	NaN	NaN	NaN	NaN	NaN	NaN	NaN	216.281	153.155	NaN	NaN	NaN	NaN	65.2401	NaN	NaN	NaN	NaN	NaN	NaN	NaN	66.4552	71.8267	NaN	67.0675	NaN	168.969	79.075	NaN	NaN	26.7424	NaN	105.183	NaN	NaN	NaN	NaN	162.887	NaN	NaN	NaN	NaN	53.1159	52.1179	81.192	67.2891	231.756
	137.178	134.106	NaN	NaN	NaN	NaN	NaN	NaN	NaN	217.773	154.626	NaN	NaN	NaN	NaN	68.4577	NaN	NaN	NaN	NaN	NaN	NaN	NaN	39.8993	72.4787	NaN	67.0513	NaN	169.855	79.9991	NaN	NaN	27.4068	NaN	106.036	NaN	NaN	NaN	NaN	163.239	NaN	NaN	NaN	NaN	53.8249	50.8058	81.0422	68.3935	218.017
	137.163	132.371	NaN	NaN	NaN	NaN	NaN	NaN	NaN	217.608	154.913	NaN	NaN	NaN	NaN	69.8118	NaN	NaN	NaN	NaN	NaN	NaN	NaN	35.7121	70.4732	NaN	73.3225	NaN	165.53	78.6648	NaN	NaN	24.4896	NaN	106.482	NaN	NaN	NaN	NaN	162.196	NaN	NaN	NaN	NaN	52.8375	48.4597	79.3467	67.1272	214.9
	139.02	132.547	NaN	NaN	NaN	NaN	NaN	NaN	NaN	218.085	158.29	NaN	NaN	NaN	NaN	68.469	NaN	NaN	NaN	NaN	NaN	NaN	NaN	34.0944	73.8871	NaN	62.4761	NaN	163.623	79.0533	NaN	NaN	25.186	NaN	109.455	NaN	NaN	NaN	NaN	163.271	NaN	NaN	NaN	NaN	53.8336	48.1119	79.6579	67.5977	214.862
	138.502	129.723	NaN	NaN	NaN	NaN	NaN	NaN	NaN	216.46	157.423	NaN	NaN	NaN	NaN	61.999	NaN	NaN	NaN	NaN	NaN	NaN	NaN	30.3603	70.7472	NaN	63.2007	NaN	170.483	78.3482	NaN	NaN	22.8516	NaN	109.215	NaN	NaN	NaN	NaN	162.993	NaN	NaN	NaN	NaN	55.0478	46.0659	76.4896	66.8645	212.915
	140.455	131.682	NaN	NaN	NaN	NaN	NaN	NaN	NaN	217.692	160.592	NaN	NaN	NaN	NaN	64.8228	NaN	NaN	NaN	NaN	NaN	NaN	NaN	32.3088	72.6975	NaN	65.4599	NaN	155.733	78.1835	NaN	NaN	23.0456	NaN	110.501	NaN	NaN	NaN	NaN	163.455	NaN	NaN	NaN	NaN	56.644	45.7656	75.1745	68.2479	213.213
	138.4	133.935	NaN	NaN	NaN	NaN	NaN	NaN	NaN	219.192	159.242	NaN	NaN	NaN	NaN	66.166	NaN	NaN	NaN	NaN	NaN	NaN	NaN	37.8057	71.476	NaN	63.8	NaN	151.334	79.762	NaN	NaN	21.2887	NaN	109.725	NaN	NaN	NaN	NaN	161.822	NaN	NaN	NaN	NaN	53.3312	45.5703	70.6888	66.887	211.781
	139.739	132.459	NaN	NaN	NaN	NaN	NaN	NaN	NaN	219.09	161.823	NaN	NaN	NaN	NaN	69.1404	NaN	NaN	NaN	NaN	NaN	NaN	NaN	25.7391	63.1631	NaN	65.1154	NaN	150.927	81.0793	NaN	NaN	21.7718	NaN	112.838	NaN	NaN	NaN	NaN	163.775	NaN	NaN	NaN	NaN	53.3568	46.0135	69.0729	67.7592	211.318
	140.195	139.17	NaN	NaN	NaN	NaN	NaN	NaN	NaN	217.621	159.541	NaN	NaN	NaN	NaN	69.6207	NaN	NaN	NaN	NaN	NaN	NaN	NaN	21.1928	62.3397	NaN	65.4573	NaN	146.143	81.2354	NaN	NaN	18.8057	NaN	112.02	NaN	NaN	NaN	NaN	163.948	NaN	NaN	NaN	NaN	49.3735	46.1224	66.8293	67.4218	208.958
	143.059	130.702	NaN	NaN	NaN	NaN	NaN	NaN	NaN	217.076	161.588	NaN	NaN	NaN	NaN	72.4912	NaN	NaN	NaN	NaN	NaN	NaN	NaN	20.537	62.1748	NaN	67.9475	NaN	148.094	83.2214	NaN	NaN	18.3758	NaN	109.858	NaN	NaN	NaN	NaN	166.191	NaN	NaN	NaN	NaN	50.3074	47.1285	67.127	68.8434	210.242
	143.583	132.808	NaN	NaN	NaN	NaN	NaN	NaN	NaN	222.017	161.216	NaN	NaN	NaN	NaN	72.4482	NaN	NaN	NaN	NaN	NaN	NaN	NaN	20.6224	61.9694	NaN	68.6962	NaN	153.534	83.1483	NaN	NaN	17.2875	NaN	116.604	NaN	NaN	NaN	NaN	164.721	NaN	NaN	NaN	NaN	46.7616	47.2207	65.1173	69.765	208.091
	144.676	133.197	NaN	NaN	NaN	NaN	NaN	NaN	NaN	224.659	164.179	NaN	NaN	NaN	NaN	74.4505	NaN	NaN	NaN	NaN	NaN	NaN	NaN	20.9238	63.451	NaN	71.8801	NaN	141.458	84.6603	NaN	NaN	18.0723	NaN	120.56	NaN	NaN	NaN	NaN	165.325	NaN	NaN	NaN	NaN	46.492	49.9878	65.8334	72.386	210.376
	145.219	150.812	NaN	NaN	NaN	NaN	NaN	NaN	NaN	223.465	161.834	NaN	NaN	NaN	NaN	73.369	NaN	NaN	NaN	NaN	NaN	NaN	NaN	20.2542	62.7669	NaN	75.6318	NaN	138.595	82.8182	NaN	NaN	16.4427	NaN	117.801	NaN	NaN	NaN	NaN	164.277	NaN	NaN	NaN	NaN	44.7042	50.2799	63.9798	73.088	211.212
	147.95	155.709	NaN	NaN	NaN	NaN	NaN	NaN	NaN	224.658	163.933	NaN	NaN	NaN	NaN	73.9363	NaN	NaN	NaN	NaN	NaN	NaN	NaN	24.3131	67.1271	NaN	78.3292	NaN	138.137	85.7532	NaN	NaN	18.4952	NaN	120.378	NaN	NaN	NaN	NaN	166.121	NaN	NaN	NaN	NaN	46.6297	52.9817	63.0831	75.8537	213.513
	148.796	155.139	NaN	NaN	NaN	NaN	NaN	NaN	NaN	223.95	160.9	NaN	NaN	NaN	NaN	74.3351	NaN	NaN	NaN	NaN	NaN	NaN	NaN	25.4159	65.1813	NaN	78.8683	NaN	136.071	85.6971	NaN	NaN	15.9548	NaN	113.231	NaN	NaN	NaN	NaN	166.017	NaN	NaN	NaN	NaN	45.7512	51.9363	61.2811	74.8417	213.034
	152.013	157.946	NaN	NaN	NaN	NaN	NaN	NaN	NaN	224.856	163.958	NaN	NaN	NaN	NaN	75.8423	NaN	NaN	NaN	NaN	NaN	NaN	NaN	29.1102	68.3894	NaN	79.6878	NaN	138.228	87.919	NaN	NaN	16.4198	NaN	118.285	NaN	NaN	NaN	NaN	167.426	NaN	NaN	NaN	NaN	48.3426	52.7084	61.9565	75.8871	215.341
	151.58	158.266	NaN	NaN	NaN	NaN	NaN	NaN	NaN	226.001	160.188	NaN	NaN	NaN	NaN	75.5167	NaN	NaN	NaN	NaN	NaN	NaN	NaN	29.7348	67.4757	NaN	78.561	NaN	136.289	89.4773	NaN	NaN	14.0255	NaN	118.254	NaN	NaN	NaN	NaN	167.798	NaN	NaN	NaN	NaN	46.3835	51.3547	61.8652	75.6196	214.77
	153.107	162.276	NaN	NaN	NaN	NaN	NaN	NaN	NaN	225.772	163.5	NaN	NaN	NaN	NaN	80.2898	NaN	NaN	NaN	NaN	NaN	NaN	NaN	32.7055	69.7316	NaN	76.8107	NaN	140.827	92.1701	NaN	NaN	17.8226	NaN	120.615	NaN	NaN	NaN	NaN	169.483	NaN	NaN	NaN	NaN	48.9075	52.1614	63.8714	75.2687	214.784
	154.685	162.934	NaN	NaN	NaN	NaN	NaN	NaN	NaN	225.679	162.529	NaN	NaN	NaN	NaN	79.3175	NaN	NaN	NaN	NaN	NaN	NaN	NaN	32.942	68.6537	NaN	78.5987	NaN	141.856	91.2718	NaN	NaN	15.1629	NaN	119.187	NaN	NaN	NaN	NaN	168.753	NaN	NaN	NaN	NaN	49.7649	51.3837	64.4161	72.9168	213.274
	156.739	163.334	NaN	NaN	NaN	NaN	NaN	NaN	NaN	230.022	165.491	NaN	NaN	NaN	NaN	82.4842	NaN	NaN	NaN	NaN	NaN	NaN	NaN	27.2631	72.839	NaN	70.6309	NaN	145.454	94.5444	NaN	NaN	16.9084	NaN	121.37	NaN	NaN	NaN	NaN	170.674	NaN	NaN	NaN	NaN	51.4488	52.3446	66.6561	73.4304	214.188
	157.32	158.665	NaN	NaN	NaN	NaN	NaN	NaN	NaN	227.408	164.953	NaN	NaN	NaN	NaN	81.4706	NaN	NaN	NaN	NaN	NaN	NaN	NaN	42.8763	73.394	NaN	66.7661	NaN	146	91.2449	NaN	NaN	16.694	NaN	118.053	NaN	NaN	NaN	NaN	168.914	NaN	NaN	NaN	NaN	52.1615	53.4607	67.7123	71.8709	212.904
	159.796	159.09	NaN	NaN	NaN	NaN	NaN	NaN	NaN	229.383	165.503	NaN	NaN	NaN	NaN	83.8597	NaN	NaN	NaN	NaN	NaN	NaN	NaN	46.4865	77.3328	NaN	66.9868	NaN	148.368	91.0844	NaN	NaN	18.7417	NaN	120.916	NaN	NaN	NaN	NaN	170.636	NaN	NaN	NaN	NaN	56.3751	54.1505	70.0117	72.3707	216.704
	159.371	156.578	NaN	NaN	NaN	NaN	NaN	NaN	NaN	225.939	164.072	NaN	NaN	NaN	NaN	82.8271	NaN	NaN	NaN	NaN	NaN	NaN	NaN	45.9571	77.7773	NaN	64.959	NaN	149.819	90.8836	NaN	NaN	14.3314	NaN	119.386	NaN	NaN	NaN	NaN	166.38	NaN	NaN	NaN	NaN	54.6832	54.2987	70.5001	70.5938	216.661
	158.827	155.744	NaN	NaN	NaN	NaN	NaN	NaN	NaN	226.888	166.608	NaN	NaN	NaN	NaN	84.5133	NaN	NaN	NaN	NaN	NaN	NaN	NaN	49.9879	80.7991	NaN	65.689	NaN	151.023	93.0143	NaN	NaN	16.0899	NaN	120.572	NaN	NaN	NaN	NaN	168.261	NaN	NaN	NaN	NaN	56.9238	56.4461	72.7649	69.8206	219.048
	155.678	152.926	NaN	NaN	NaN	NaN	NaN	NaN	NaN	226.976	164.843	NaN	NaN	NaN	NaN	84.3443	NaN	NaN	NaN	NaN	NaN	NaN	NaN	49.4316	78.4626	NaN	65.2006	NaN	150.922	92.4736	NaN	NaN	13.0791	NaN	118.255	NaN	NaN	NaN	NaN	165.654	NaN	NaN	NaN	NaN	51.8052	55.8535	70.435	67.9065	217.641
	154.498	152.128	NaN	NaN	NaN	NaN	NaN	NaN	NaN	228.514	164.519	NaN	NaN	NaN	NaN	87.4476	NaN	NaN	NaN	NaN	NaN	NaN	NaN	50.0658	79.2985	NaN	66.1538	NaN	153.312	95.0732	NaN	NaN	12.7416	NaN	117.301	NaN	NaN	NaN	NaN	166.309	NaN	NaN	NaN	NaN	54.2683	56.7994	70.1041	68.2033	218.262
	152.144	149.713	NaN	NaN	NaN	NaN	NaN	NaN	NaN	230.035	161.669	NaN	NaN	NaN	NaN	91.0997	NaN	NaN	NaN	NaN	NaN	NaN	NaN	50.5562	75.2887	NaN	66.1821	NaN	156.612	97.9293	NaN	NaN	13.6766	NaN	120.029	NaN	NaN	NaN	NaN	165.851	NaN	NaN	NaN	NaN	58.1079	57.0508	68.325	65.773	215.133
	149.343	148.552	NaN	NaN	NaN	NaN	NaN	NaN	NaN	229.656	157.599	NaN	NaN	NaN	NaN	93.7385	NaN	NaN	NaN	NaN	NaN	NaN	NaN	50.048	70.9157	NaN	65.324	NaN	157.923	100.197	NaN	NaN	13.2663	NaN	120.317	NaN	NaN	NaN	NaN	165.891	NaN	NaN	NaN	NaN	54.8499	57.1679	68.4573	61.7497	214.305
	147.696	145.267	NaN	NaN	NaN	NaN	NaN	NaN	NaN	227.239	155.622	NaN	NaN	NaN	NaN	89.6665	NaN	NaN	NaN	NaN	NaN	NaN	NaN	49.9758	72.1314	NaN	55.6496	NaN	156.658	96.2503	NaN	NaN	14.2016	NaN	119.347	NaN	NaN	NaN	NaN	164.03	NaN	NaN	NaN	NaN	56.8953	55.3141	66.7192	60.851	212.993
	147.106	147.388	NaN	NaN	NaN	NaN	NaN	NaN	NaN	231.523	155.727	NaN	NaN	NaN	NaN	91.3329	NaN	NaN	NaN	NaN	NaN	NaN	NaN	49.8077	74.0708	NaN	56.4807	NaN	158.956	97.4341	NaN	NaN	15.465	NaN	121.452	NaN	NaN	NaN	NaN	163.385	NaN	NaN	NaN	NaN	59.1778	55.6569	68.0468	60.8856	213.863
	146.634	142.56	NaN	NaN	NaN	NaN	NaN	NaN	NaN	230.52	156.001	NaN	NaN	NaN	NaN	89.2737	NaN	NaN	NaN	NaN	NaN	NaN	NaN	49.8112	76.618	NaN	57.5611	NaN	154.829	96.3673	NaN	NaN	15.8761	NaN	120.512	NaN	NaN	NaN	NaN	162.379	NaN	NaN	NaN	NaN	60.1328	54.4493	65.2633	61.1521	213.941
	147.38	140.67	NaN	NaN	NaN	NaN	NaN	NaN	NaN	231.132	159.293	NaN	NaN	NaN	NaN	82.7278	NaN	NaN	NaN	NaN	NaN	NaN	NaN	51.4818	77.627	NaN	59.602	NaN	155.452	96.3765	NaN	NaN	17.8057	NaN	120.881	NaN	NaN	NaN	NaN	161.648	NaN	NaN	NaN	NaN	63.7999	55.0722	64.3158	62.524	215.225
	146.683	139.585	NaN	NaN	NaN	NaN	NaN	NaN	NaN	229.892	157.945	NaN	NaN	NaN	NaN	77.9315	NaN	NaN	NaN	NaN	NaN	NaN	NaN	51.762	78.3371	NaN	57.6435	NaN	154.634	94.7672	NaN	NaN	16.9375	NaN	115.895	NaN	NaN	NaN	NaN	160.298	NaN	NaN	NaN	NaN	61.1395	52.1669	60.8191	64.358	214.309
	148.369	140.056	NaN	NaN	NaN	NaN	NaN	NaN	NaN	232.917	159.452	NaN	NaN	NaN	NaN	78.8607	NaN	NaN	NaN	NaN	NaN	NaN	NaN	52.6204	80.4041	NaN	58.6623	NaN	154.408	95.672	NaN	NaN	17.0244	NaN	119.964	NaN	NaN	NaN	NaN	161.068	NaN	NaN	NaN	NaN	62.3591	51.7004	60.548	67.8226	215.498
	148.693	139.351	NaN	NaN	NaN	NaN	NaN	NaN	NaN	230.945	158.528	NaN	NaN	NaN	NaN	74.7867	NaN	NaN	NaN	NaN	NaN	NaN	NaN	51.0618	77.9337	NaN	58.3138	NaN	153.924	95.6782	NaN	NaN	16.3674	NaN	119.142	NaN	NaN	NaN	NaN	160.858	NaN	NaN	NaN	NaN	60.0679	48.8761	59.4967	67.7701	213.9
	151.354	141.615	NaN	NaN	NaN	NaN	NaN	NaN	NaN	231.082	158.217	NaN	NaN	NaN	NaN	78.4646	NaN	NaN	NaN	NaN	NaN	NaN	NaN	49.9947	79.8013	NaN	59.6171	NaN	155.435	97.3634	NaN	NaN	15.9932	NaN	118.23	NaN	NaN	NaN	NaN	162.014	NaN	NaN	NaN	NaN	59.9869	47.3091	58.3597	70.2146	214.106
	149.532	140.128	NaN	NaN	NaN	NaN	NaN	NaN	NaN	232.176	157.785	NaN	NaN	NaN	NaN	80.3297	NaN	NaN	NaN	NaN	NaN	NaN	NaN	50.0868	79.328	NaN	57.3944	NaN	156.195	99.0903	NaN	NaN	14.1116	NaN	113.654	NaN	NaN	NaN	NaN	161.409	NaN	NaN	NaN	NaN	57.0911	45.6333	56.2536	70.0881	209.665
	150.296	140.581	NaN	NaN	NaN	NaN	NaN	NaN	NaN	232.841	159.309	NaN	NaN	NaN	NaN	78.3961	NaN	NaN	NaN	NaN	NaN	NaN	NaN	48.1432	79.5517	NaN	60.3438	NaN	159.123	102.189	NaN	NaN	15.3684	NaN	116.029	NaN	NaN	NaN	NaN	162.169	NaN	NaN	NaN	NaN	56.8161	46.111	57.1724	70.1307	210.68
	149.988	139.812	NaN	NaN	NaN	NaN	NaN	NaN	NaN	232.737	160.28	NaN	NaN	NaN	NaN	71.5822	NaN	NaN	NaN	NaN	NaN	NaN	NaN	47.1253	80.9413	NaN	58.6347	NaN	158.432	101.665	NaN	NaN	12.8136	NaN	113.974	NaN	NaN	NaN	NaN	160.853	NaN	NaN	NaN	NaN	54.6507	45.1718	54.9493	69.8801	208.835
	151.068	143.244	NaN	NaN	NaN	NaN	NaN	NaN	NaN	233.688	164.517	NaN	NaN	NaN	NaN	74.5263	NaN	NaN	NaN	NaN	NaN	NaN	NaN	47.1007	82.6453	NaN	59.0081	NaN	160.94	103.864	NaN	NaN	15.897	NaN	113.717	NaN	NaN	NaN	NaN	160.811	NaN	NaN	NaN	NaN	54.5181	45.8394	56.5885	69.9401	210.313
	151.071	141.989	NaN	NaN	NaN	NaN	NaN	NaN	NaN	230.615	164.99	NaN	NaN	NaN	NaN	73.3982	NaN	NaN	NaN	NaN	NaN	NaN	NaN	44.8181	82.9905	NaN	61.1512	NaN	159.81	100.62	NaN	NaN	12.5687	NaN	115.942	NaN	NaN	NaN	NaN	160.639	NaN	NaN	NaN	NaN	53.4677	44.5503	56.2117	68.7577	207.587
	152.55	143.444	NaN	NaN	NaN	NaN	NaN	NaN	NaN	232.747	166.966	NaN	NaN	NaN	NaN	79.3629	NaN	NaN	NaN	NaN	NaN	NaN	NaN	44.1066	85.143	NaN	62.48	NaN	161.161	103.925	NaN	NaN	13.7788	NaN	114.842	NaN	NaN	NaN	NaN	159.246	NaN	NaN	NaN	NaN	55.9901	45.8983	54.3527	70.3805	210.162
	152.672	143.982	NaN	NaN	NaN	NaN	NaN	NaN	NaN	228.171	167.575	NaN	NaN	NaN	NaN	78.7364	NaN	NaN	NaN	NaN	NaN	NaN	NaN	41.3553	84.8117	NaN	62.0813	NaN	160.705	100.619	NaN	NaN	14.091	NaN	112.43	NaN	NaN	NaN	NaN	158.533	NaN	NaN	NaN	NaN	53.9097	45.2374	52.2161	70.0393	209.26
	153.503	145.748	NaN	NaN	NaN	NaN	NaN	NaN	NaN	226.471	170.19	NaN	NaN	NaN	NaN	80.2319	NaN	NaN	NaN	NaN	NaN	NaN	NaN	41.088	87.4189	NaN	64.5723	NaN	160.836	105.037	NaN	NaN	12.9592	NaN	112.824	NaN	NaN	NaN	NaN	157.11	NaN	NaN	NaN	NaN	56.6131	45.6696	55.5294	71.165	211.871
	153.416	147.068	NaN	NaN	NaN	NaN	NaN	NaN	NaN	231.432	168.838	NaN	NaN	NaN	NaN	79.9626	NaN	NaN	NaN	NaN	NaN	NaN	NaN	40.3311	85.6685	NaN	61.9532	NaN	161.017	105.761	NaN	NaN	10.7685	NaN	110.286	NaN	NaN	NaN	NaN	155.853	NaN	NaN	NaN	NaN	54.1324	45.3879	53.065	69.3578	210.103
	154.037	150.197	NaN	NaN	NaN	NaN	NaN	NaN	NaN	231.145	169.307	NaN	NaN	NaN	NaN	82.8551	NaN	NaN	NaN	NaN	NaN	NaN	NaN	39.7601	85.1188	NaN	63.8485	NaN	161.893	108.951	NaN	NaN	14.2223	NaN	114.93	NaN	NaN	NaN	NaN	158.912	NaN	NaN	NaN	NaN	53.8606	45.5032	54.2321	71.1935	211.133
	154.426	150.831	NaN	NaN	NaN	NaN	NaN	NaN	NaN	235.54	167.925	NaN	NaN	NaN	NaN	83.1311	NaN	NaN	NaN	NaN	NaN	NaN	NaN	39.7512	82.8919	NaN	59.8006	NaN	161.771	108.455	NaN	NaN	13.8608	NaN	114.93	NaN	NaN	NaN	NaN	154.894	NaN	NaN	NaN	NaN	54.481	45.0806	55.9396	68.2405	210.782
	155.671	154.241	NaN	NaN	NaN	NaN	NaN	NaN	NaN	235.444	169.53	NaN	NaN	NaN	NaN	84.0484	NaN	NaN	NaN	NaN	NaN	NaN	NaN	41.3829	83.9126	NaN	61.0644	NaN	162.007	110.061	NaN	NaN	14.1073	NaN	118.712	NaN	NaN	NaN	NaN	155.159	NaN	NaN	NaN	NaN	55.8453	45.5096	58.3123	68.7611	211.576
	156.405	153.087	NaN	NaN	NaN	NaN	NaN	NaN	NaN	231.564	168.918	NaN	NaN	NaN	NaN	80.7978	NaN	NaN	NaN	NaN	NaN	NaN	NaN	41.4552	83.3525	NaN	60.5646	NaN	161.192	105.399	NaN	NaN	16.0358	NaN	116.407	NaN	NaN	NaN	NaN	152.174	NaN	NaN	NaN	NaN	56.0967	44.8995	60.5797	67.8279	212.469
	157.69	152.375	NaN	NaN	NaN	NaN	NaN	NaN	NaN	231.288	170.409	NaN	NaN	NaN	NaN	80.3084	NaN	NaN	NaN	NaN	NaN	NaN	NaN	43.4361	85.1366	NaN	61.9917	NaN	162.142	103.536	NaN	NaN	16.7732	NaN	118.776	NaN	NaN	NaN	NaN	154.159	NaN	NaN	NaN	NaN	57.944	46.2975	64.0298	69.7119	214.596
	158.595	150.464	NaN	NaN	NaN	NaN	NaN	NaN	NaN	236.512	168.521	NaN	NaN	NaN	NaN	78.1151	NaN	NaN	NaN	NaN	NaN	NaN	NaN	41.5711	85.1153	NaN	62.5535	NaN	162.936	102.565	NaN	NaN	16.5884	NaN	114.93	NaN	NaN	NaN	NaN	152.084	NaN	NaN	NaN	NaN	58.0669	46.5847	64.1206	66.5177	213.237
	160.341	150.233	NaN	NaN	NaN	NaN	NaN	NaN	NaN	238.087	169.634	NaN	NaN	NaN	NaN	78.1583	NaN	NaN	NaN	NaN	NaN	NaN	NaN	42.9956	86.7408	NaN	65.1964	NaN	163.653	102.701	NaN	NaN	19.7732	NaN	116.821	NaN	NaN	NaN	NaN	156.999	NaN	NaN	NaN	NaN	59.8357	49.3644	66.3231	69.1355	216.32
	161.046	153.664	NaN	NaN	NaN	NaN	NaN	NaN	NaN	237.262	169.224	NaN	NaN	NaN	NaN	75.7168	NaN	NaN	NaN	NaN	NaN	NaN	NaN	42.5816	84.8561	NaN	65.066	NaN	163.686	101.111	NaN	NaN	21.258	NaN	117.56	NaN	NaN	NaN	NaN	154.114	NaN	NaN	NaN	NaN	57.0881	48.7408	65.1518	67.8418	214.967
	162.606	140.569	NaN	NaN	NaN	NaN	NaN	NaN	NaN	238.149	162.722	NaN	NaN	NaN	NaN	74.9603	NaN	NaN	NaN	NaN	NaN	NaN	NaN	42.7651	85.277	NaN	65.3436	NaN	164.215	101.624	NaN	NaN	21.9228	NaN	117.592	NaN	NaN	NaN	NaN	154.047	NaN	NaN	NaN	NaN	58.0726	49.1521	66.7847	68.1539	215.932
	162.41	151.419	NaN	NaN	NaN	NaN	NaN	NaN	NaN	236.612	161.412	NaN	NaN	NaN	NaN	73.6265	NaN	NaN	NaN	NaN	NaN	NaN	NaN	42.29	84.018	NaN	64.9408	NaN	163.209	99.6321	NaN	NaN	19.5992	NaN	105.127	NaN	NaN	NaN	NaN	151.861	NaN	NaN	NaN	NaN	57.7128	50.3291	64.4831	64.636	214.74
	162.827	135.997	NaN	NaN	NaN	NaN	NaN	NaN	NaN	238.746	160.418	NaN	NaN	NaN	NaN	73.7076	NaN	NaN	NaN	NaN	NaN	NaN	NaN	42.179	83.6981	NaN	68.2615	NaN	164.662	101.437	NaN	NaN	19.0949	NaN	105.699	NaN	NaN	NaN	NaN	151.364	NaN	NaN	NaN	NaN	57.5423	52.5896	64.9364	64.1572	215.601
	162.916	134.22	NaN	NaN	NaN	NaN	NaN	NaN	NaN	240.484	158.99	NaN	NaN	NaN	NaN	72.8556	NaN	NaN	NaN	NaN	NaN	NaN	NaN	43.3582	79.5735	NaN	69.9397	NaN	165.857	102.306	NaN	NaN	19.56	NaN	105.26	NaN	NaN	NaN	NaN	148.431	NaN	NaN	NaN	NaN	56.4014	55.7965	64.0426	61.0338	216.226
	164.088	135.548	NaN	NaN	NaN	NaN	NaN	NaN	NaN	241.103	159.327	NaN	NaN	NaN	NaN	72.5515	NaN	NaN	NaN	NaN	NaN	NaN	NaN	41.7116	76.0244	NaN	69.9418	NaN	163.95	102.406	NaN	NaN	20.0687	NaN	102.787	NaN	NaN	NaN	NaN	144.375	NaN	NaN	NaN	NaN	55.4538	58.2231	64.6355	56.6377	218.464
	162.059	145.994	NaN	NaN	NaN	NaN	NaN	NaN	NaN	237.38	158.052	NaN	NaN	NaN	NaN	71.2018	NaN	NaN	NaN	NaN	NaN	NaN	NaN	40.3608	72.1059	NaN	67.71	NaN	163.712	101.642	NaN	NaN	18.9977	NaN	111.359	NaN	NaN	NaN	NaN	140.956	NaN	NaN	NaN	NaN	53.9208	58.293	60.7162	55.3844	217.179
	162.611	126.18	NaN	NaN	NaN	NaN	NaN	NaN	NaN	240.199	159.934	NaN	NaN	NaN	NaN	68.5569	NaN	NaN	NaN	NaN	NaN	NaN	NaN	41.0976	72.6801	NaN	67.1748	NaN	165.262	102.078	NaN	NaN	19.1066	NaN	92.7684	NaN	NaN	NaN	NaN	140.408	NaN	NaN	NaN	NaN	55.3461	60.7087	62.7588	56.936	218.75
	161.187	121.946	NaN	NaN	NaN	NaN	NaN	NaN	NaN	239.615	158.367	NaN	NaN	NaN	NaN	73.2816	NaN	NaN	NaN	NaN	NaN	NaN	NaN	41.0622	68.4482	NaN	64.014	NaN	162.433	99.685	NaN	NaN	19.3755	NaN	105.48	NaN	NaN	NaN	NaN	137.748	NaN	NaN	NaN	NaN	54.9438	61.5248	61.4628	57.1504	217.888
	160.002	120.559	NaN	NaN	NaN	NaN	NaN	NaN	NaN	236.965	161.74	NaN	NaN	NaN	NaN	67.3321	NaN	NaN	NaN	NaN	NaN	NaN	NaN	41.8544	69.1602	NaN	63.542	NaN	164.598	102.656	NaN	NaN	20.4745	NaN	82.4746	NaN	NaN	NaN	NaN	137.907	NaN	NaN	NaN	NaN	56.6564	63.6895	61.2948	58.9627	217.746
	157.892	119.475	NaN	NaN	NaN	NaN	NaN	NaN	NaN	235.126	158.69	NaN	NaN	NaN	NaN	66.2317	NaN	NaN	NaN	NaN	NaN	NaN	NaN	42.4277	68.0398	NaN	59.5726	NaN	163.212	103.157	NaN	NaN	22.8669	NaN	107.073	NaN	NaN	NaN	NaN	137.236	NaN	NaN	NaN	NaN	54.4464	63.6742	58.1502	57.837	213.106
	155.895	120.296	NaN	NaN	NaN	NaN	NaN	NaN	NaN	238.525	158.856	NaN	NaN	NaN	NaN	66.938	NaN	NaN	NaN	NaN	NaN	NaN	NaN	43.614	68.7155	NaN	59.5233	NaN	166.744	105.112	NaN	NaN	25.8576	NaN	89.6747	NaN	NaN	NaN	NaN	139.109	NaN	NaN	NaN	NaN	54.0735	63.9752	57.886	59.1106	212.655
	152.57	121.589	NaN	NaN	NaN	NaN	NaN	NaN	NaN	238.826	159.15	NaN	NaN	NaN	NaN	67.6375	NaN	NaN	NaN	NaN	NaN	NaN	NaN	44.8123	68.1047	NaN	57.2274	NaN	166.953	105.406	NaN	NaN	25.4747	NaN	72.2762	NaN	NaN	NaN	NaN	137.699	NaN	NaN	NaN	NaN	51.5296	62.281	54.6451	59.3126	208.113
	150.554	122.612	NaN	NaN	NaN	NaN	NaN	NaN	NaN	239.713	156.156	NaN	NaN	NaN	NaN	70.3068	NaN	NaN	NaN	NaN	NaN	NaN	NaN	46.3049	69.3757	NaN	57.7637	NaN	169.821	107.282	NaN	NaN	28.0104	NaN	72.6033	NaN	NaN	NaN	NaN	138.367	NaN	NaN	NaN	NaN	53.9822	62.3938	53.5812	60.5173	206.892
	147.713	122.136	NaN	NaN	NaN	NaN	NaN	NaN	NaN	239.252	155.227	NaN	NaN	NaN	NaN	72.538	NaN	NaN	NaN	NaN	NaN	NaN	NaN	48.57	70.6434	NaN	55.0142	NaN	168.527	106.821	NaN	NaN	28.8208	NaN	70.9647	NaN	NaN	NaN	NaN	138.23	NaN	NaN	NaN	NaN	52.9715	58.037	51.9618	61.8769	204.492
	147.111	123.805	NaN	NaN	NaN	NaN	NaN	NaN	NaN	240.547	158.773	NaN	NaN	NaN	NaN	76.5229	NaN	NaN	NaN	NaN	NaN	NaN	NaN	49.724	74.8902	NaN	55.5432	NaN	170.893	108.085	NaN	NaN	33.7395	NaN	72.2403	NaN	NaN	NaN	NaN	138.404	NaN	NaN	NaN	NaN	53.85	56.6558	51.8026	62.607	204.261
	145.314	124.596	NaN	NaN	NaN	NaN	NaN	NaN	NaN	239.449	160.138	NaN	NaN	NaN	NaN	75.5045	NaN	NaN	NaN	NaN	NaN	NaN	NaN	50.2262	75.4388	NaN	52.5721	NaN	168.142	107.751	NaN	NaN	32.982	NaN	71.5212	NaN	NaN	NaN	NaN	137.923	NaN	NaN	NaN	NaN	54.0973	63.1281	48.0762	64.5738	202.341
	144.904	128.426	NaN	NaN	NaN	NaN	NaN	NaN	NaN	241.26	163.906	NaN	NaN	NaN	NaN	80.1835	NaN	NaN	NaN	NaN	NaN	NaN	NaN	51.3798	79.1456	NaN	53.0293	NaN	167.926	109.325	NaN	NaN	33.1641	NaN	74.7005	NaN	NaN	NaN	NaN	137.46	NaN	NaN	NaN	NaN	55.7436	50.4081	48.5053	67.378	202.843
	144.796	128.296	NaN	NaN	NaN	NaN	NaN	NaN	NaN	239.143	162.507	NaN	NaN	NaN	NaN	83.5781	NaN	NaN	NaN	NaN	NaN	NaN	NaN	47.5992	79.9384	NaN	52.3139	NaN	167.677	109.888	NaN	NaN	29.761	NaN	72.6132	NaN	NaN	NaN	NaN	135.712	NaN	NaN	NaN	NaN	55.7727	45.6362	45.6129	65.9185	202.414
	144.604	131.673	NaN	NaN	NaN	NaN	NaN	NaN	NaN	241.227	167.014	NaN	NaN	NaN	NaN	88.5724	NaN	NaN	NaN	NaN	NaN	NaN	NaN	48.7663	82.4803	NaN	49.5599	NaN	168.551	114.075	NaN	NaN	29.9543	NaN	77.5085	NaN	NaN	NaN	NaN	137.311	NaN	NaN	NaN	NaN	58.5794	43.9271	45.7093	69.213	201.084
	144.752	133.101	NaN	NaN	NaN	NaN	NaN	NaN	NaN	240.668	163.441	NaN	NaN	NaN	NaN	86.4854	NaN	NaN	NaN	NaN	NaN	NaN	NaN	44.6749	81.5194	NaN	48.3695	NaN	167.722	113.839	NaN	NaN	26.7098	NaN	80.4196	NaN	NaN	NaN	NaN	134.126	NaN	NaN	NaN	NaN	57.0537	39.654	44.2952	68.2068	201.352
	145.678	137.488	NaN	NaN	NaN	NaN	NaN	NaN	NaN	242.266	164.28	NaN	NaN	NaN	NaN	91.1663	NaN	NaN	NaN	NaN	NaN	NaN	NaN	48.0183	83.5196	NaN	48.8137	NaN	172.144	116.012	NaN	NaN	27.1256	NaN	84.816	NaN	NaN	NaN	NaN	135.001	NaN	NaN	NaN	NaN	57.6637	38.1858	44.0199	68.2621	202.202
	146.605	136.887	NaN	NaN	NaN	NaN	NaN	NaN	NaN	242.869	162.683	NaN	NaN	NaN	NaN	90.1865	NaN	NaN	NaN	NaN	NaN	NaN	NaN	45.1541	83.3632	NaN	50.3659	NaN	171.999	116.305	NaN	NaN	26.4946	NaN	86.6831	NaN	NaN	NaN	NaN	133.488	NaN	NaN	NaN	NaN	57.2462	36.4997	44.4005	64.2306	204.025
	146.87	139.027	NaN	NaN	NaN	NaN	NaN	NaN	NaN	244.775	163.716	NaN	NaN	NaN	NaN	86.0753	NaN	NaN	NaN	NaN	NaN	NaN	NaN	46.8853	84.7206	NaN	52.7498	NaN	173.647	117.856	NaN	NaN	27.1073	NaN	90.4336	NaN	NaN	NaN	NaN	135.451	NaN	NaN	NaN	NaN	57.1293	37.2923	47.3242	65.1286	204.627
	148.725	135.868	NaN	NaN	NaN	NaN	NaN	NaN	NaN	243.205	162.839	NaN	NaN	NaN	NaN	91.5717	NaN	NaN	NaN	NaN	NaN	NaN	NaN	46.2574	82.7302	NaN	53.1208	NaN	173.427	115.287	NaN	NaN	26.1614	NaN	89.4321	NaN	NaN	NaN	NaN	132.574	NaN	NaN	NaN	NaN	57.6601	36.5434	48.0251	63.7276	205.278
	149.876	134.96	NaN	NaN	NaN	NaN	NaN	NaN	NaN	244.787	163.428	NaN	NaN	NaN	NaN	90.2696	NaN	NaN	NaN	NaN	NaN	NaN	NaN	47.4082	84.7887	NaN	57.3039	NaN	174.915	114.856	NaN	NaN	26.9177	NaN	88.8601	NaN	NaN	NaN	NaN	132.28	NaN	NaN	NaN	NaN	58.9838	39.0537	50.5582	63.9287	208.918
	150.292	132.066	NaN	NaN	NaN	NaN	NaN	NaN	NaN	242.874	162.701	NaN	NaN	NaN	NaN	86.3988	NaN	NaN	NaN	NaN	NaN	NaN	NaN	47.6875	82.4589	NaN	59.8862	NaN	173.638	112.135	NaN	NaN	28.2213	NaN	84.6902	NaN	NaN	NaN	NaN	129.746	NaN	NaN	NaN	NaN	59.6959	38.2544	51.539	62.5046	208.631
	152.85	134.081	NaN	NaN	NaN	NaN	NaN	NaN	NaN	242.851	163.836	NaN	NaN	NaN	NaN	84.9152	NaN	NaN	NaN	NaN	NaN	NaN	NaN	48.6102	83.8284	NaN	63.0112	NaN	173.96	112.297	NaN	NaN	32.2534	NaN	83.1208	NaN	NaN	NaN	NaN	132.124	NaN	NaN	NaN	NaN	63.7544	39.9801	56.1996	63.3	209.619
	152.447	137.447	NaN	NaN	NaN	NaN	NaN	NaN	NaN	241.457	160.764	NaN	NaN	NaN	NaN	81.7358	NaN	NaN	NaN	NaN	NaN	NaN	NaN	47.8021	82.2781	NaN	58.6887	NaN	174.024	111.57	NaN	NaN	33.2456	NaN	89.9328	NaN	NaN	NaN	NaN	131.014	NaN	NaN	NaN	NaN	61.9066	40.8513	57.0037	62.2624	209.395
	154.735	127.316	NaN	NaN	NaN	NaN	NaN	NaN	NaN	241.46	162.992	NaN	NaN	NaN	NaN	81.5171	NaN	NaN	NaN	NaN	NaN	NaN	NaN	49.3584	82.621	NaN	55.2123	NaN	172.864	111.816	NaN	NaN	35.5656	NaN	73.1188	NaN	NaN	NaN	NaN	130.626	NaN	NaN	NaN	NaN	64.5389	42.4207	59.3108	63.2805	209.727
	154.087	124.981	NaN	NaN	NaN	NaN	NaN	NaN	NaN	238.664	163.064	NaN	NaN	NaN	NaN	80.0476	NaN	NaN	NaN	NaN	NaN	NaN	NaN	49.8472	81.1443	NaN	63.4346	NaN	169.984	111.696	NaN	NaN	36.6755	NaN	68.2184	NaN	NaN	NaN	NaN	126.533	NaN	NaN	NaN	NaN	64.7893	44.0056	63.1254	60.3528	209.888
	154.339	133.073	NaN	NaN	NaN	NaN	NaN	NaN	NaN	242.042	162.273	NaN	NaN	NaN	NaN	79.883	NaN	NaN	NaN	NaN	NaN	NaN	NaN	51.8712	81.7999	NaN	64.9318	NaN	172.437	112.544	NaN	NaN	41.1394	NaN	68.2019	NaN	NaN	NaN	NaN	130.935	NaN	NaN	NaN	NaN	66.3916	47.2126	67.5779	61.2674	210.101
	153.301	135.764	NaN	NaN	NaN	NaN	NaN	NaN	NaN	241.362	159.655	NaN	NaN	NaN	NaN	78.4977	NaN	NaN	NaN	NaN	NaN	NaN	NaN	52.7116	82.3049	NaN	66.2143	NaN	168.987	110.916	NaN	NaN	41.9701	NaN	65.3131	NaN	NaN	NaN	NaN	131.569	NaN	NaN	NaN	NaN	65.7216	48.34	71.6792	60.9126	210.34
	152.652	132.381	NaN	NaN	NaN	NaN	NaN	NaN	NaN	245.02	161.817	NaN	NaN	NaN	NaN	80.0623	NaN	NaN	NaN	NaN	NaN	NaN	NaN	53.7083	82.7429	NaN	65.5978	NaN	171.746	111.731	NaN	NaN	45.6253	NaN	65.034	NaN	NaN	NaN	NaN	126.858	NaN	NaN	NaN	NaN	65.364	51.7798	73.3236	60.6732	210.549
	151.842	126.148	NaN	NaN	NaN	NaN	NaN	NaN	NaN	243.923	163.623	NaN	NaN	NaN	NaN	78.5983	NaN	NaN	NaN	NaN	NaN	NaN	NaN	55.6499	84.3301	NaN	69.4476	NaN	171.424	111.102	NaN	NaN	46.0673	NaN	62.7331	NaN	NaN	NaN	NaN	124.441	NaN	NaN	NaN	NaN	64.6016	52.097	76.7734	59.4721	211.404
	151.496	120.243	NaN	NaN	NaN	NaN	NaN	NaN	NaN	240.003	166.744	NaN	NaN	NaN	NaN	80.0152	NaN	NaN	NaN	NaN	NaN	NaN	NaN	58.5122	86.15	NaN	69.8622	NaN	162.267	108.933	NaN	NaN	47.38	NaN	62.9484	NaN	NaN	NaN	NaN	121.029	NaN	NaN	NaN	NaN	62.814	53.6879	80.8009	60.3608	211.866
	149.254	118.198	NaN	NaN	NaN	NaN	NaN	NaN	NaN	239.333	164.307	NaN	NaN	NaN	NaN	79.1385	NaN	NaN	NaN	NaN	NaN	NaN	NaN	57.5578	82.2356	NaN	67.1496	NaN	158.25	107.108	NaN	NaN	45.9898	NaN	61.8404	NaN	NaN	NaN	NaN	120.742	NaN	NaN	NaN	NaN	61.0336	52.3161	82.7022	57.9539	210.495
	149.78	120.621	NaN	NaN	NaN	NaN	NaN	NaN	NaN	240.196	166.986	NaN	NaN	NaN	NaN	82.0411	NaN	NaN	NaN	NaN	NaN	NaN	NaN	58.5724	82.2818	NaN	67.8768	NaN	156.638	107.787	NaN	NaN	47.7693	NaN	61.9106	NaN	NaN	NaN	NaN	120.783	NaN	NaN	NaN	NaN	61.4883	52.5052	86.4046	58.115	210.033
	147.684	118.443	NaN	NaN	NaN	NaN	NaN	NaN	NaN	240.289	165.85	NaN	NaN	NaN	NaN	80.8817	NaN	NaN	NaN	NaN	NaN	NaN	NaN	57.0429	79.3249	NaN	66.3113	NaN	171.585	104.993	NaN	NaN	45.6444	NaN	61.4819	NaN	NaN	NaN	NaN	120.627	NaN	NaN	NaN	NaN	59.5443	51.2116	88.8928	56.1152	207.336
	147.201	118.38	NaN	NaN	NaN	NaN	NaN	NaN	NaN	241.15	167.166	NaN	NaN	NaN	NaN	84.8415	NaN	NaN	NaN	NaN	NaN	NaN	NaN	58.1263	78.5061	NaN	63.7289	NaN	150.889	106.354	NaN	NaN	44.2832	NaN	62.7223	NaN	NaN	NaN	NaN	122.534	NaN	NaN	NaN	NaN	59.2055	51.1	91.7446	56.2125	204.982
	145.953	115.892	NaN	NaN	NaN	NaN	NaN	NaN	NaN	238.948	163.86	NaN	NaN	NaN	NaN	84.1909	NaN	NaN	NaN	NaN	NaN	NaN	NaN	57.2155	77.5789	NaN	64.5301	NaN	147.713	105.679	NaN	NaN	43.3726	NaN	62.836	NaN	NaN	NaN	NaN	119.122	NaN	NaN	NaN	NaN	58.1489	47.3686	93.9505	54.0713	201.34
	146.196	117.46	NaN	NaN	NaN	NaN	NaN	NaN	NaN	242.506	165.382	NaN	NaN	NaN	NaN	88.0515	NaN	NaN	NaN	NaN	NaN	NaN	NaN	55.4098	77.7226	NaN	65.4299	NaN	145.079	109.33	NaN	NaN	45.0263	NaN	65.8924	NaN	NaN	NaN	NaN	120.01	NaN	NaN	NaN	NaN	58.5047	45.7018	84.5534	53.019	201.112
	146.601	115.515	NaN	NaN	NaN	NaN	NaN	NaN	NaN	240.929	161.788	NaN	NaN	NaN	NaN	87.8478	NaN	NaN	NaN	NaN	NaN	NaN	NaN	56.0608	76.9901	NaN	64.9992	NaN	143.021	108.245	NaN	NaN	44.5848	NaN	67.5017	NaN	NaN	NaN	NaN	120.705	NaN	NaN	NaN	NaN	58.0309	43.5916	101.241	51.0991	198.989
	147.283	118.738	NaN	NaN	NaN	NaN	NaN	NaN	NaN	244.249	166.075	NaN	NaN	NaN	NaN	92.2523	NaN	NaN	NaN	NaN	NaN	NaN	NaN	57.7866	80.5613	NaN	68.2308	NaN	143.955	109.17	NaN	NaN	48.117	NaN	62.1021	NaN	NaN	NaN	NaN	113.868	NaN	NaN	NaN	NaN	58.7443	43.6456	104.718	50.5818	197.773
	147.295	115.206	NaN	NaN	NaN	NaN	NaN	NaN	NaN	240.049	167.156	NaN	NaN	NaN	NaN	90.9047	NaN	NaN	NaN	NaN	NaN	NaN	NaN	54.8058	79.9438	NaN	66.6517	NaN	141.04	109.041	NaN	NaN	47.5712	NaN	73.591	NaN	NaN	NaN	NaN	109.827	NaN	NaN	NaN	NaN	58.2521	41.2103	104.994	49.7633	195.167
	146.705	116.589	NaN	NaN	NaN	NaN	NaN	NaN	NaN	243.914	171.515	NaN	NaN	NaN	NaN	94.4169	NaN	NaN	NaN	NaN	NaN	NaN	NaN	57.4527	83.4341	NaN	64.98	NaN	138.581	110.358	NaN	NaN	48.8185	NaN	78.2519	NaN	NaN	NaN	NaN	111.929	NaN	NaN	NaN	NaN	58.3478	39.9666	107.635	52.4445	195.137
	147.096	115.942	NaN	NaN	NaN	NaN	NaN	NaN	NaN	243.655	170.457	NaN	NaN	NaN	NaN	93.7603	NaN	NaN	NaN	NaN	NaN	NaN	NaN	56.359	79.1344	NaN	71.3677	NaN	134.053	108.983	NaN	NaN	45.9527	NaN	76.1304	NaN	NaN	NaN	NaN	107.174	NaN	NaN	NaN	NaN	57.8525	36.0974	110.247	52.246	192.349
	148.368	117.117	NaN	NaN	NaN	NaN	NaN	NaN	NaN	244.545	174.787	NaN	NaN	NaN	NaN	95.6256	NaN	NaN	NaN	NaN	NaN	NaN	NaN	55.5896	81.4394	NaN	70.709	NaN	136.541	108.708	NaN	NaN	47.1877	NaN	80.2917	NaN	NaN	NaN	NaN	110.31	NaN	NaN	NaN	NaN	57.3671	35.0308	111.047	55.0404	193.902
	148.111	118.227	NaN	NaN	NaN	NaN	NaN	NaN	NaN	242.182	173.611	NaN	NaN	NaN	NaN	94.6552	NaN	NaN	NaN	NaN	NaN	NaN	NaN	54.8667	79.8945	NaN	69.1133	NaN	134.996	115.575	NaN	NaN	45.6031	NaN	79.3162	NaN	NaN	NaN	NaN	106.865	NaN	NaN	NaN	NaN	55.8771	32.2775	112.059	54.9974	191.562
	148.452	122.369	NaN	NaN	NaN	NaN	NaN	NaN	NaN	244.397	176.574	NaN	NaN	NaN	NaN	97.9986	NaN	NaN	NaN	NaN	NaN	NaN	NaN	54.8681	80.5639	NaN	70.8612	NaN	136.87	109.7	NaN	NaN	45.3292	NaN	83.0908	NaN	NaN	NaN	NaN	107.033	NaN	NaN	NaN	NaN	55.3075	32.7159	113.658	56.9171	195.311
	148.836	123.319	NaN	NaN	NaN	NaN	NaN	NaN	NaN	244.121	174.66	NaN	NaN	NaN	NaN	95.6494	NaN	NaN	NaN	NaN	NaN	NaN	NaN	54.4438	80.3871	NaN	71.5868	NaN	135.494	120.449	NaN	NaN	44.5883	NaN	80.5665	NaN	NaN	NaN	NaN	104.729	NaN	NaN	NaN	NaN	51.3866	32.0324	116.438	57.4119	194.399
	149.854	125.47	NaN	NaN	NaN	NaN	NaN	NaN	NaN	246.751	176.376	NaN	NaN	NaN	NaN	97.8274	NaN	NaN	NaN	NaN	NaN	NaN	NaN	56.3916	81.3886	NaN	74.7856	NaN	137.844	123.381	NaN	NaN	44.5056	NaN	83.6508	NaN	NaN	NaN	NaN	104.193	NaN	NaN	NaN	NaN	50.8743	33.6743	117.072	58.1787	195.634
	149.777	124.196	NaN	NaN	NaN	NaN	NaN	NaN	NaN	244.662	174.516	NaN	NaN	NaN	NaN	95.4587	NaN	NaN	NaN	NaN	NaN	NaN	NaN	56.788	82.0542	NaN	75.9208	NaN	137.622	122.606	NaN	NaN	44.5067	NaN	82.5943	NaN	NaN	NaN	NaN	102.783	NaN	NaN	NaN	NaN	48.2445	33.3115	114.587	55.9186	196.25
	151.002	127.429	NaN	NaN	NaN	NaN	NaN	NaN	NaN	247.998	176.684	NaN	NaN	NaN	NaN	97.1245	NaN	NaN	NaN	NaN	NaN	NaN	NaN	60.1641	84.0592	NaN	69.9873	NaN	140.029	125.061	NaN	NaN	45.2831	NaN	85.0679	NaN	NaN	NaN	NaN	102.8	NaN	NaN	NaN	NaN	49.0254	35.5575	114.624	58.051	198.776
	150.922	122.844	NaN	NaN	NaN	NaN	NaN	NaN	NaN	244.007	177.465	NaN	NaN	NaN	NaN	96.3695	NaN	NaN	NaN	NaN	NaN	NaN	NaN	59.5036	83.5916	NaN	83.2037	NaN	139.755	122.057	NaN	NaN	44.5546	NaN	82.29	NaN	NaN	NaN	NaN	101.444	NaN	NaN	NaN	NaN	47.2873	35.6951	112.932	54.6722	194.896
	151.766	121.478	NaN	NaN	NaN	NaN	NaN	NaN	NaN	241.385	179.059	NaN	NaN	NaN	NaN	96.813	NaN	NaN	NaN	NaN	NaN	NaN	NaN	60.0944	85.5693	NaN	88.0443	NaN	143.545	122.839	NaN	NaN	46.3592	NaN	82.3823	NaN	NaN	NaN	NaN	101.678	NaN	NaN	NaN	NaN	48.5359	36.8237	109.522	56.0035	197.463
	152.014	118.206	NaN	NaN	NaN	NaN	NaN	NaN	NaN	241.937	177.77	NaN	NaN	NaN	NaN	97.583	NaN	NaN	NaN	NaN	NaN	NaN	NaN	56.3558	85.3231	NaN	87.6984	NaN	144.513	121.334	NaN	NaN	46.026	NaN	83.1226	NaN	NaN	NaN	NaN	101.598	NaN	NaN	NaN	NaN	46.2454	36.8952	106.554	54.378	195.301
	152.587	117.934	NaN	NaN	NaN	NaN	NaN	NaN	NaN	243.351	178.99	NaN	NaN	NaN	NaN	100.916	NaN	NaN	NaN	NaN	NaN	NaN	NaN	55.1653	85.9879	NaN	91.3181	NaN	148.907	122.217	NaN	NaN	44.7856	NaN	78.7093	NaN	NaN	NaN	NaN	102.962	NaN	NaN	NaN	NaN	47.7412	37.2214	107.17	53.8831	197.714
	152.359	114.251	NaN	NaN	NaN	NaN	NaN	NaN	NaN	244.121	176.923	NaN	NaN	NaN	NaN	101.016	NaN	NaN	NaN	NaN	NaN	NaN	NaN	59.8338	85.5727	NaN	91.0675	NaN	148.4	122.457	NaN	NaN	48.2762	NaN	76.742	NaN	NaN	NaN	NaN	102.034	NaN	NaN	NaN	NaN	46.8781	38.1824	104.261	50.9477	196.229
	152.484	117.717	NaN	NaN	NaN	NaN	NaN	NaN	NaN	245.902	177.142	NaN	NaN	NaN	NaN	104.714	NaN	NaN	NaN	NaN	NaN	NaN	NaN	48.5251	86.1393	NaN	85.624	NaN	150.12	123.219	NaN	NaN	49.2262	NaN	78.5239	NaN	NaN	NaN	NaN	103.772	NaN	NaN	NaN	NaN	46.8371	39.5204	104.087	50.2383	197.232
	151.839	119.842	NaN	NaN	NaN	NaN	NaN	NaN	NaN	246.619	174.241	NaN	NaN	NaN	NaN	103.88	NaN	NaN	NaN	NaN	NaN	NaN	NaN	46.4679	84.5636	NaN	96.992	NaN	145.789	121.783	NaN	NaN	48.4103	NaN	77.284	NaN	NaN	NaN	NaN	103.302	NaN	NaN	NaN	NaN	46.6663	39.0542	103.45	49.027	197.372
	151.844	114.066	NaN	NaN	NaN	NaN	NaN	NaN	NaN	247.229	173.459	NaN	NaN	NaN	NaN	105.223	NaN	NaN	NaN	NaN	NaN	NaN	NaN	44.6339	85.7122	NaN	100.828	NaN	145.465	124.901	NaN	NaN	48.8064	NaN	78.7911	NaN	NaN	NaN	NaN	103.447	NaN	NaN	NaN	NaN	47.3627	41.5868	107.115	49.4199	199.238
	149.425	116.093	NaN	NaN	NaN	NaN	NaN	NaN	NaN	244.88	171.891	NaN	NaN	NaN	NaN	104.316	NaN	NaN	NaN	NaN	NaN	NaN	NaN	42.5732	85.8619	NaN	101.959	NaN	141.319	124.321	NaN	NaN	48.7044	NaN	78.1793	NaN	NaN	NaN	NaN	102.644	NaN	NaN	NaN	NaN	48.915	41.9688	108.075	47.9931	198.892
	148.858	106.02	NaN	NaN	NaN	NaN	NaN	NaN	NaN	246.715	172.192	NaN	NaN	NaN	NaN	104.696	NaN	NaN	NaN	NaN	NaN	NaN	NaN	44.0292	86.8535	NaN	88.3457	NaN	139.8	126.059	NaN	NaN	49.3798	NaN	82.8172	NaN	NaN	NaN	NaN	104.636	NaN	NaN	NaN	NaN	49.4509	43.9487	109.459	48.6337	200.448
	147.858	106.37	NaN	NaN	NaN	NaN	NaN	NaN	NaN	247.278	174.113	NaN	NaN	NaN	NaN	103.901	NaN	NaN	NaN	NaN	NaN	NaN	NaN	45.2313	87.1686	NaN	110.031	NaN	136.153	123.94	NaN	NaN	48.1364	NaN	82.1331	NaN	NaN	NaN	NaN	106.52	NaN	NaN	NaN	NaN	52.5256	44.2129	110.767	48.6739	198.575
	146.788	102.704	NaN	NaN	NaN	NaN	NaN	NaN	NaN	244.33	173.828	NaN	NaN	NaN	NaN	103.759	NaN	NaN	NaN	NaN	NaN	NaN	NaN	45.9643	87.4856	NaN	112.992	NaN	135.983	119.491	NaN	NaN	48.1024	NaN	80.5995	NaN	NaN	NaN	NaN	104.932	NaN	NaN	NaN	NaN	53.8989	45.1497	113.315	50.7347	198.625
	145.325	100.571	NaN	NaN	NaN	NaN	NaN	NaN	NaN	244.481	171.218	NaN	NaN	NaN	NaN	101.687	NaN	NaN	NaN	NaN	NaN	NaN	NaN	42.8918	84.7833	NaN	112.563	NaN	143.392	117.912	NaN	NaN	44.7661	NaN	79.6441	NaN	NaN	NaN	NaN	102.398	NaN	NaN	NaN	NaN	53.2218	44.515	113.212	48.5849	195.609
	145.705	101.363	NaN	NaN	NaN	NaN	NaN	NaN	NaN	244.933	172.916	NaN	NaN	NaN	NaN	101.783	NaN	NaN	NaN	NaN	NaN	NaN	NaN	46.2191	84.6775	NaN	113.738	NaN	129.681	117.095	NaN	NaN	43.8408	NaN	81.9903	NaN	NaN	NaN	NaN	102.394	NaN	NaN	NaN	NaN	55.9549	45.4369	114.602	49.3703	195.939
	144.665	100.523	NaN	NaN	NaN	NaN	NaN	NaN	NaN	244.462	170.853	NaN	NaN	NaN	NaN	99.8352	NaN	NaN	NaN	NaN	NaN	NaN	NaN	43.828	84.3134	NaN	114.468	NaN	125.038	115.255	NaN	NaN	41.9532	NaN	81.1936	NaN	NaN	NaN	NaN	100.139	NaN	NaN	NaN	NaN	53.9057	44.9449	113.936	48.9693	193.967
	146.402	102.683	NaN	NaN	NaN	NaN	NaN	NaN	NaN	245.669	172.926	NaN	NaN	NaN	NaN	100.094	NaN	NaN	NaN	NaN	NaN	NaN	NaN	44.183	84.7424	NaN	114.73	NaN	128.215	118.069	NaN	NaN	42.6708	NaN	85.9959	NaN	NaN	NaN	NaN	100.753	NaN	NaN	NaN	NaN	55.7459	45.6456	116.821	49.038	193.184
	146.105	102.895	NaN	NaN	NaN	NaN	NaN	NaN	NaN	245	170.285	NaN	NaN	NaN	NaN	99.7985	NaN	NaN	NaN	NaN	NaN	NaN	NaN	43.4811	83.2773	NaN	114.764	NaN	139.687	114.617	NaN	NaN	40.4537	NaN	86.7679	NaN	NaN	NaN	NaN	96.1087	NaN	NaN	NaN	NaN	54.4407	45.2951	117.599	49.5653	191.913
	147.23	104.83	NaN	NaN	NaN	NaN	NaN	NaN	NaN	247.759	173.171	NaN	NaN	NaN	NaN	101.342	NaN	NaN	NaN	NaN	NaN	NaN	NaN	42.934	84.766	NaN	116.986	NaN	120.458	115.475	NaN	NaN	41.7029	NaN	88.7461	NaN	NaN	NaN	NaN	95.8199	NaN	NaN	NaN	NaN	54.6638	45.5007	116.822	50.3889	192.36
	147.74	101.705	NaN	NaN	NaN	NaN	NaN	NaN	NaN	248.183	171.91	NaN	NaN	NaN	NaN	103.073	NaN	NaN	NaN	NaN	NaN	NaN	NaN	39.9937	83.6971	NaN	116.427	NaN	116.793	112.659	NaN	NaN	42.1316	NaN	89.3629	NaN	NaN	NaN	NaN	91.934	NaN	NaN	NaN	NaN	50.6464	44.8593	115.741	49.8626	190.627
	147.746	102.7	NaN	NaN	NaN	NaN	NaN	NaN	NaN	247.33	175.269	NaN	NaN	NaN	NaN	105.683	NaN	NaN	NaN	NaN	NaN	NaN	NaN	40.9314	83.8594	NaN	118.752	NaN	116.493	113.924	NaN	NaN	42.6427	NaN	90.2582	NaN	NaN	NaN	NaN	91.709	NaN	NaN	NaN	NaN	50.1612	45.5409	114.925	50.8278	191.472
	147.872	98.1832	NaN	NaN	NaN	NaN	NaN	NaN	NaN	246.737	173.736	NaN	NaN	NaN	NaN	106.373	NaN	NaN	NaN	NaN	NaN	NaN	NaN	37.4365	81.5818	NaN	116.924	NaN	115.405	115.044	NaN	NaN	42.8554	NaN	89.3222	NaN	NaN	NaN	NaN	90.2742	NaN	NaN	NaN	NaN	48.4903	44.1232	113.059	48.584	189.964
	148.152	103.016	NaN	NaN	NaN	NaN	NaN	NaN	NaN	247.283	175.202	NaN	NaN	NaN	NaN	108.664	NaN	NaN	NaN	NaN	NaN	NaN	NaN	41.004	82.1344	NaN	119.931	NaN	116.058	116.457	NaN	NaN	44.2887	NaN	89.4749	NaN	NaN	NaN	NaN	92.7954	NaN	NaN	NaN	NaN	48.8451	43.5673	111.783	49.043	191.74
	147.829	103.268	NaN	NaN	NaN	NaN	NaN	NaN	NaN	248.233	173.061	NaN	NaN	NaN	NaN	108.836	NaN	NaN	NaN	NaN	NaN	NaN	NaN	37.5563	79.7656	NaN	117.026	NaN	113.166	117.928	NaN	NaN	45.0691	NaN	86.147	NaN	NaN	NaN	NaN	91.5816	NaN	NaN	NaN	NaN	48.4117	41.6834	110.772	47.6008	189.675
	148.474	102.203	NaN	NaN	NaN	NaN	NaN	NaN	NaN	249.583	173.686	NaN	NaN	NaN	NaN	110.55	NaN	NaN	NaN	NaN	NaN	NaN	NaN	38.6527	79.2407	NaN	118.188	NaN	116.643	120.753	NaN	NaN	47.6398	NaN	86.0857	NaN	NaN	NaN	NaN	92.2272	NaN	NaN	NaN	NaN	48.3667	40.851	110.691	47.6534	191.978
	148.191	100.442	NaN	NaN	NaN	NaN	NaN	NaN	NaN	249.682	173.42	NaN	NaN	NaN	NaN	109.625	NaN	NaN	NaN	NaN	NaN	NaN	NaN	38.55	77.0154	NaN	118.581	NaN	115.949	121.834	NaN	NaN	48.1789	NaN	84.3313	NaN	NaN	NaN	NaN	91.0752	NaN	NaN	NaN	NaN	45.935	38.9458	109.023	45.9191	191.73
	149.146	97.513	NaN	NaN	NaN	NaN	NaN	NaN	NaN	252.184	175.091	NaN	NaN	NaN	NaN	109.055	NaN	NaN	NaN	NaN	NaN	NaN	NaN	41.4973	77.6804	NaN	119.792	NaN	116.687	125.767	NaN	NaN	49.5915	NaN	83.6374	NaN	NaN	NaN	NaN	92.7358	NaN	NaN	NaN	NaN	46.4452	39.6603	108.873	46.3461	192.67
	148.827	94.4148	NaN	NaN	NaN	NaN	NaN	NaN	NaN	252.017	174.744	NaN	NaN	NaN	NaN	105.879	NaN	NaN	NaN	NaN	NaN	NaN	NaN	42.1425	76.7744	NaN	120.086	NaN	114.148	124.965	NaN	NaN	46.5646	NaN	83.2547	NaN	NaN	NaN	NaN	92.6823	NaN	NaN	NaN	NaN	45.5824	38.4459	107.848	44.1179	191.795
	149.487	94.8804	NaN	NaN	NaN	NaN	NaN	NaN	NaN	253.162	177.032	NaN	NaN	NaN	NaN	105.645	NaN	NaN	NaN	NaN	NaN	NaN	NaN	45.237	77.7302	NaN	121.452	NaN	114.329	126.643	NaN	NaN	46.6744	NaN	84.6346	NaN	NaN	NaN	NaN	92.558	NaN	NaN	NaN	NaN	47.538	38.7426	109.762	43.3912	194.462
	148.756	91.2727	NaN	NaN	NaN	NaN	NaN	NaN	NaN	251.079	177.805	NaN	NaN	NaN	NaN	103.522	NaN	NaN	NaN	NaN	NaN	NaN	NaN	46.3446	76.056	NaN	120.144	NaN	113.826	126.429	NaN	NaN	42.6377	NaN	83.1151	NaN	NaN	NaN	NaN	91.922	NaN	NaN	NaN	NaN	48.1276	38.0581	105.786	40.7427	194.491
	148.811	91.9237	NaN	NaN	NaN	NaN	NaN	NaN	NaN	252.806	178.341	NaN	NaN	NaN	NaN	103.323	NaN	NaN	NaN	NaN	NaN	NaN	NaN	48.8791	76.5902	NaN	122.561	NaN	113.981	126.96	NaN	NaN	42.7659	NaN	83.5656	NaN	NaN	NaN	NaN	92.8508	NaN	NaN	NaN	NaN	49.5378	38.7143	103.798	41.2881	195.881
	147.201	88.1326	NaN	NaN	NaN	NaN	NaN	NaN	NaN	250.552	176.569	NaN	NaN	NaN	NaN	99.9023	NaN	NaN	NaN	NaN	NaN	NaN	NaN	49.2475	76.1475	NaN	121.151	NaN	113.991	126.529	NaN	NaN	40.2177	NaN	81.0588	NaN	NaN	NaN	NaN	92.7938	NaN	NaN	NaN	NaN	49.7927	38.168	99.7874	40.267	194.203
	146.631	88.2673	NaN	NaN	NaN	NaN	NaN	NaN	NaN	252.182	177.449	NaN	NaN	NaN	NaN	100.724	NaN	NaN	NaN	NaN	NaN	NaN	NaN	51.3929	78.5482	NaN	122.492	NaN	115.983	126.878	NaN	NaN	39.1677	NaN	80.7084	NaN	NaN	NaN	NaN	97.2716	NaN	NaN	NaN	NaN	51.0177	38.283	98.4897	40.3267	194.2
	145.018	84.7972	NaN	NaN	NaN	NaN	NaN	NaN	NaN	252.2	176.937	NaN	NaN	NaN	NaN	96.1212	NaN	NaN	NaN	NaN	NaN	NaN	NaN	52.0959	78.2736	NaN	121.117	NaN	115.127	126.976	NaN	NaN	39.2307	NaN	78.5679	NaN	NaN	NaN	NaN	92.7753	NaN	NaN	NaN	NaN	46.713	36.4394	96.4894	39.5657	193.576
	144.482	87.2509	NaN	NaN	NaN	NaN	NaN	NaN	NaN	253.834	177.021	NaN	NaN	NaN	NaN	95.2671	NaN	NaN	NaN	NaN	NaN	NaN	NaN	47.6118	80.6778	NaN	122.327	NaN	117.013	128.019	NaN	NaN	40.482	NaN	78.8085	NaN	NaN	NaN	NaN	94.6571	NaN	NaN	NaN	NaN	47.5409	36.1353	95.5267	39.4942	194.894
	141.481	83.3711	NaN	NaN	NaN	NaN	NaN	NaN	NaN	252.143	176.866	NaN	NaN	NaN	NaN	101.613	NaN	NaN	NaN	NaN	NaN	NaN	NaN	58.3509	80.8865	NaN	121.695	NaN	116.605	126.3	NaN	NaN	39.9703	NaN	77.9746	NaN	NaN	NaN	NaN	90.0362	NaN	NaN	NaN	NaN	44.3226	34.1022	93.1294	39.2606	194.414
	140.622	84.744	NaN	NaN	NaN	NaN	NaN	NaN	NaN	254.127	176.776	NaN	NaN	NaN	NaN	88.2857	NaN	NaN	NaN	NaN	NaN	NaN	NaN	60.7714	84.0789	NaN	123.442	NaN	118.435	125.795	NaN	NaN	41.3673	NaN	78.7499	NaN	NaN	NaN	NaN	88.8232	NaN	NaN	NaN	NaN	45.3454	34.9318	93.4286	40.0889	195.507
	137.111	82.1059	NaN	NaN	NaN	NaN	NaN	NaN	NaN	252.191	176.385	NaN	NaN	NaN	NaN	83.8749	NaN	NaN	NaN	NaN	NaN	NaN	NaN	60.671	83.7111	NaN	124.358	NaN	117.585	121.612	NaN	NaN	40.7035	NaN	76.8474	NaN	NaN	NaN	NaN	85.9734	NaN	NaN	NaN	NaN	43.5935	32.5291	91.3408	40.2928	193.763
	136.191	82.055	NaN	NaN	NaN	NaN	NaN	NaN	NaN	253.152	177.82	NaN	NaN	NaN	NaN	84.5525	NaN	NaN	NaN	NaN	NaN	NaN	NaN	65.6449	86.1101	NaN	128.624	NaN	117.47	121.166	NaN	NaN	43.3475	NaN	77.0303	NaN	NaN	NaN	NaN	85.8346	NaN	NaN	NaN	NaN	45.0877	33.4719	92.4073	42.2726	194.824
	133.243	80.4728	NaN	NaN	NaN	NaN	NaN	NaN	NaN	251.675	174.784	NaN	NaN	NaN	NaN	81.5855	NaN	NaN	NaN	NaN	NaN	NaN	NaN	65.6551	85.8026	NaN	128.465	NaN	117.071	117.925	NaN	NaN	42.3596	NaN	72.9346	NaN	NaN	NaN	NaN	82.9585	NaN	NaN	NaN	NaN	45.7735	31.1967	90.364	41.4771	191.781
	132.332	80.3636	NaN	NaN	NaN	NaN	NaN	NaN	NaN	252.904	175.982	NaN	NaN	NaN	NaN	81.7864	NaN	NaN	NaN	NaN	NaN	NaN	NaN	66.8593	84.947	NaN	122.569	NaN	116.333	117.477	NaN	NaN	41.573	NaN	71.5166	NaN	NaN	NaN	NaN	83.908	NaN	NaN	NaN	NaN	45.8686	31.6226	91.2705	43.7726	192.444
	130.362	80.1122	NaN	NaN	NaN	NaN	NaN	NaN	NaN	252.695	173.978	NaN	NaN	NaN	NaN	79.6112	NaN	NaN	NaN	NaN	NaN	NaN	NaN	67.7901	85.3288	NaN	133.856	NaN	120.299	117.674	NaN	NaN	42.2471	NaN	67.8074	NaN	NaN	NaN	NaN	85.5166	NaN	NaN	NaN	NaN	44.9459	31.5445	90.6526	41.8711	191.635
	127.7	82.0804	NaN	NaN	NaN	NaN	NaN	NaN	NaN	251.426	170.708	NaN	NaN	NaN	NaN	74.6965	NaN	NaN	NaN	NaN	NaN	NaN	NaN	66.5017	83.7563	NaN	133.828	NaN	121.862	117.908	NaN	NaN	40.3325	NaN	76.9388	NaN	NaN	NaN	NaN	88.9381	NaN	NaN	NaN	NaN	44.598	29.6291	86.4821	39.3492	189.617
	125.613	81.2639	NaN	NaN	NaN	NaN	NaN	NaN	NaN	250.593	167.662	NaN	NaN	NaN	NaN	73.0887	NaN	NaN	NaN	NaN	NaN	NaN	NaN	66.5832	81.8005	NaN	133.404	NaN	117.271	117.155	NaN	NaN	38.8714	NaN	57.641	NaN	NaN	NaN	NaN	84.3966	NaN	NaN	NaN	NaN	43.5014	28.969	86.1581	37.8836	188.377
	126.27	81.4007	NaN	NaN	NaN	NaN	NaN	NaN	NaN	252.035	168.977	NaN	NaN	NaN	NaN	73.1557	NaN	NaN	NaN	NaN	NaN	NaN	NaN	66.4921	83.168	NaN	133.308	NaN	115.396	119.771	NaN	NaN	38.0965	NaN	59.2619	NaN	NaN	NaN	NaN	83.902	NaN	NaN	NaN	NaN	43.4754	29.0693	86.7689	37.048	188.934
	122.393	78.9506	NaN	NaN	NaN	NaN	NaN	NaN	NaN	252.778	168.67	NaN	NaN	NaN	NaN	72.9887	NaN	NaN	NaN	NaN	NaN	NaN	NaN	65.4787	81.3765	NaN	130.58	NaN	113.722	118.516	NaN	NaN	37.6754	NaN	55.7851	NaN	NaN	NaN	NaN	80.6291	NaN	NaN	NaN	NaN	43.0042	28.4892	86.1835	33.8397	186.824
	121.371	81.0963	NaN	NaN	NaN	NaN	NaN	NaN	NaN	255.584	169.642	NaN	NaN	NaN	NaN	74.6005	NaN	NaN	NaN	NaN	NaN	NaN	NaN	65.4898	83.925	NaN	131.366	NaN	114.237	118.626	NaN	NaN	38.5701	NaN	56.3075	NaN	NaN	NaN	NaN	80.4424	NaN	NaN	NaN	NaN	43.0861	29.2944	86.4417	33.9867	187.096
	120.369	80.2575	NaN	NaN	NaN	NaN	NaN	NaN	NaN	251.38	168.943	NaN	NaN	NaN	NaN	73.2412	NaN	NaN	NaN	NaN	NaN	NaN	NaN	63.1121	80.3141	NaN	130.084	NaN	112.242	117.979	NaN	NaN	38.4105	NaN	54.1081	NaN	NaN	NaN	NaN	80.1202	NaN	NaN	NaN	NaN	42.904	28.5737	84.9217	29.8661	184.366
	120.535	80.2304	NaN	NaN	NaN	NaN	NaN	NaN	NaN	251.573	172.163	NaN	NaN	NaN	NaN	75.4212	NaN	NaN	NaN	NaN	NaN	NaN	NaN	64.7679	80.6657	NaN	132.57	NaN	112.894	118.313	NaN	NaN	38.5325	NaN	53.0808	NaN	NaN	NaN	NaN	80.1122	NaN	NaN	NaN	NaN	45.2937	28.5124	85.6127	32.07	185.45
	119.97	78.9876	NaN	NaN	NaN	NaN	NaN	NaN	NaN	247.444	170.055	NaN	NaN	NaN	NaN	73.9101	NaN	NaN	NaN	NaN	NaN	NaN	NaN	61.5622	77.3633	NaN	131.216	NaN	112.522	117.228	NaN	NaN	38.9127	NaN	48.9483	NaN	NaN	NaN	NaN	80.9393	NaN	NaN	NaN	NaN	44.6062	25.8567	81.409	31.465	181.397
	120.084	80.6832	NaN	NaN	NaN	NaN	NaN	NaN	NaN	250.805	171.756	NaN	NaN	NaN	NaN	75.845	NaN	NaN	NaN	NaN	NaN	NaN	NaN	60.77	76.5298	NaN	132.641	NaN	114.603	118.256	NaN	NaN	40.1475	NaN	47.634	NaN	NaN	NaN	NaN	82.4566	NaN	NaN	NaN	NaN	46.6385	25.5335	81.2275	32.4316	182.7
	119.091	77.9853	NaN	NaN	NaN	NaN	NaN	NaN	NaN	248.742	169.71	NaN	NaN	NaN	NaN	74.3031	NaN	NaN	NaN	NaN	NaN	NaN	NaN	57.1123	74.4106	NaN	130.562	NaN	113.966	117.409	NaN	NaN	38.8826	NaN	45.2592	NaN	NaN	NaN	NaN	84.9148	NaN	NaN	NaN	NaN	44.8419	22.5266	85.6817	31.949	182.051
	120.69	80.244	NaN	NaN	NaN	NaN	NaN	NaN	NaN	250.948	166.698	NaN	NaN	NaN	NaN	74.7183	NaN	NaN	NaN	NaN	NaN	NaN	NaN	58.6315	76.4788	NaN	133.649	NaN	115.14	119.844	NaN	NaN	42.8891	NaN	44.5373	NaN	NaN	NaN	NaN	89.4822	NaN	NaN	NaN	NaN	45.8501	22.0878	74.3101	33.6426	182.695
	119.085	79.609	NaN	NaN	NaN	NaN	NaN	NaN	NaN	249.802	165.312	NaN	NaN	NaN	NaN	74.413	NaN	NaN	NaN	NaN	NaN	NaN	NaN	57.1474	71.7868	NaN	133.654	NaN	114.982	119.726	NaN	NaN	44.2669	NaN	44.0538	NaN	NaN	NaN	NaN	89.4128	NaN	NaN	NaN	NaN	43.407	19.5757	71.2594	33.2467	182.309
	119.844	75.105	NaN	NaN	NaN	NaN	NaN	NaN	NaN	252.193	166.071	NaN	NaN	NaN	NaN	75.6649	NaN	NaN	NaN	NaN	NaN	NaN	NaN	57.4663	75.3324	NaN	136.678	NaN	116.389	121.179	NaN	NaN	47.1579	NaN	43.8855	NaN	NaN	NaN	NaN	81.698	NaN	NaN	NaN	NaN	42.1005	19.5939	69.3923	33.827	182.957
	116.566	72.6235	NaN	NaN	NaN	NaN	NaN	NaN	NaN	249.885	165.708	NaN	NaN	NaN	NaN	76.002	NaN	NaN	NaN	NaN	NaN	NaN	NaN	54.52	75.4702	NaN	137.284	NaN	114.774	121.107	NaN	NaN	46.8584	NaN	44.7556	NaN	NaN	NaN	NaN	91.5393	NaN	NaN	NaN	NaN	37.4592	16.9576	68.2075	34.2225	183.352
	115.909	72.3329	NaN	NaN	NaN	NaN	NaN	NaN	NaN	252.323	166.904	NaN	NaN	NaN	NaN	78.154	NaN	NaN	NaN	NaN	NaN	NaN	NaN	56.4592	71.8561	NaN	138.653	NaN	114.961	122.17	NaN	NaN	51.4759	NaN	45.4041	NaN	NaN	NaN	NaN	94.6621	NaN	NaN	NaN	NaN	37.2667	17.2751	68.676	35.4924	184.504
	114.163	70.927	NaN	NaN	NaN	NaN	NaN	NaN	NaN	250.263	166.005	NaN	NaN	NaN	NaN	78.9977	NaN	NaN	NaN	NaN	NaN	NaN	NaN	55.4463	68.2709	NaN	138.843	NaN	113.266	118.864	NaN	NaN	50.4597	NaN	45.4951	NaN	NaN	NaN	NaN	95.1813	NaN	NaN	NaN	NaN	35.1099	13.8212	66.0546	37.2491	185.27
	114.06	70.2421	NaN	NaN	NaN	NaN	NaN	NaN	NaN	251.092	167.65	NaN	NaN	NaN	NaN	81.4955	NaN	NaN	NaN	NaN	NaN	NaN	NaN	56.4594	67.0605	NaN	140.167	NaN	113.503	117.533	NaN	NaN	49.7979	NaN	45.8215	NaN	NaN	NaN	NaN	98.932	NaN	NaN	NaN	NaN	36.2805	12.8621	66.3594	38.2772	185.909
	112.613	69.6291	NaN	NaN	NaN	NaN	NaN	NaN	NaN	251.039	163.759	NaN	NaN	NaN	NaN	80.7414	NaN	NaN	NaN	NaN	NaN	NaN	NaN	55.5655	65.0823	NaN	135.31	NaN	112.118	112.613	NaN	NaN	47.2831	NaN	44.3482	NaN	NaN	NaN	NaN	100.516	NaN	NaN	NaN	NaN	34.9945	10.2688	66.2898	37.7701	183.563
	112.562	70.1773	NaN	NaN	NaN	NaN	NaN	NaN	NaN	241.716	164.109	NaN	NaN	NaN	NaN	80.9296	NaN	NaN	NaN	NaN	NaN	NaN	NaN	56.1611	64.856	NaN	137.225	NaN	112.281	110.776	NaN	NaN	47.9217	NaN	44.5497	NaN	NaN	NaN	NaN	104.582	NaN	NaN	NaN	NaN	34.9032	10.0177	68.0894	40.2461	185.127
	111.84	69.2892	NaN	NaN	NaN	NaN	NaN	NaN	NaN	240.756	161.522	NaN	NaN	NaN	NaN	80.471	NaN	NaN	NaN	NaN	NaN	NaN	NaN	56.1786	63.011	NaN	138.748	NaN	110.798	120.517	NaN	NaN	46.4748	NaN	40.0497	NaN	NaN	NaN	NaN	103.724	NaN	NaN	NaN	NaN	31.3015	7.81233	66.629	38.633	183.485
	112.093	71.9504	NaN	NaN	NaN	NaN	NaN	NaN	NaN	250.678	160.777	NaN	NaN	NaN	NaN	80.6302	NaN	NaN	NaN	NaN	NaN	NaN	NaN	57.2038	64.8017	NaN	132.15	NaN	111.773	103.092	NaN	NaN	46.6207	NaN	39.8212	NaN	NaN	NaN	NaN	105.26	NaN	NaN	NaN	NaN	32.6253	7.70521	66.6917	38.8329	183.956
	111.864	71.0393	NaN	NaN	NaN	NaN	NaN	NaN	NaN	247.322	156.156	NaN	NaN	NaN	NaN	79.6338	NaN	NaN	NaN	NaN	NaN	NaN	NaN	56.0424	62.1587	NaN	131.3	NaN	110.088	115.073	NaN	NaN	44.7734	NaN	35.9413	NaN	NaN	NaN	NaN	105.529	NaN	NaN	NaN	NaN	30.9062	6.71668	69.0866	35.1504	183.181
	113.46	73.6981	NaN	NaN	NaN	NaN	NaN	NaN	NaN	246.378	155.85	NaN	NaN	NaN	NaN	81.1997	NaN	NaN	NaN	NaN	NaN	NaN	NaN	57.0194	64.114	NaN	132.743	NaN	109.752	97.8986	NaN	NaN	44.908	NaN	35.9983	NaN	NaN	NaN	NaN	106.062	NaN	NaN	NaN	NaN	30.3819	7.61101	70.1208	34.1531	184.396
	112.894	69.7332	NaN	NaN	NaN	NaN	NaN	NaN	NaN	241.236	153.703	NaN	NaN	NaN	NaN	81.3198	NaN	NaN	NaN	NaN	NaN	NaN	NaN	54.409	61.4804	NaN	132.074	NaN	109.609	93.6875	NaN	NaN	42.7874	NaN	34.9507	NaN	NaN	NaN	NaN	105.096	NaN	NaN	NaN	NaN	31.0346	6.64073	70.4396	32.9339	184.158
	113.812	69.6029	NaN	NaN	NaN	NaN	NaN	NaN	NaN	251.542	156.502	NaN	NaN	NaN	NaN	82.1282	NaN	NaN	NaN	NaN	NaN	NaN	NaN	53.5934	61.9795	NaN	133.015	NaN	109.393	92.5894	NaN	NaN	43.5526	NaN	35.4254	NaN	NaN	NaN	NaN	106.319	NaN	NaN	NaN	NaN	32.6236	6.80235	73.7003	33.6123	185.361
	113.227	68.229	NaN	NaN	NaN	NaN	NaN	NaN	NaN	248.178	153.344	NaN	NaN	NaN	NaN	82.0591	NaN	NaN	NaN	NaN	NaN	NaN	NaN	50.2743	60.3409	NaN	133.221	NaN	108.651	89.2451	NaN	NaN	42.6874	NaN	35.2084	NaN	NaN	NaN	NaN	106.073	NaN	NaN	NaN	NaN	32.4926	6.9541	73.6506	32.1583	184.659
	113.581	68.6451	NaN	NaN	NaN	NaN	NaN	NaN	NaN	243.564	153.171	NaN	NaN	NaN	NaN	83.4422	NaN	NaN	NaN	NaN	NaN	NaN	NaN	49.6071	62.3139	NaN	137.948	NaN	108.69	88.3119	NaN	NaN	42.6978	NaN	35.4142	NaN	NaN	NaN	NaN	106.601	NaN	NaN	NaN	NaN	36.2167	7.08019	75.7528	34.137	185.325
	113.176	68.4051	NaN	NaN	NaN	NaN	NaN	NaN	NaN	244.078	149.462	NaN	NaN	NaN	NaN	81.4714	NaN	NaN	NaN	NaN	NaN	NaN	NaN	45.171	63.109	NaN	136.503	NaN	108.307	88.2549	NaN	NaN	41.9445	NaN	34.1739	NaN	NaN	NaN	NaN	108.737	NaN	NaN	NaN	NaN	36.3824	6.81742	76.4826	31.7112	184.463
	113.467	68.8966	NaN	NaN	NaN	NaN	NaN	NaN	NaN	246.389	148.743	NaN	NaN	NaN	NaN	81.5136	NaN	NaN	NaN	NaN	NaN	NaN	NaN	44.8497	67.9827	NaN	139.458	NaN	109.088	88.312	NaN	NaN	42.8806	NaN	36.606	NaN	NaN	NaN	NaN	110.358	NaN	NaN	NaN	NaN	37.8476	7.08215	79.0887	33.1358	184.102
	113.735	71.6186	NaN	NaN	NaN	NaN	NaN	NaN	NaN	250.238	145.533	NaN	NaN	NaN	NaN	78.6342	NaN	NaN	NaN	NaN	NaN	NaN	NaN	43.7793	68.807	NaN	139.416	NaN	111.628	88.5085	NaN	NaN	43.1742	NaN	39.0756	NaN	NaN	NaN	NaN	109.687	NaN	NaN	NaN	NaN	37.6105	9.07229	79.7861	31.5443	182.898
	114.427	72.8784	NaN	NaN	NaN	NaN	NaN	NaN	NaN	253.505	141.828	NaN	NaN	NaN	NaN	82.7507	NaN	NaN	NaN	NaN	NaN	NaN	NaN	42.0216	69.8321	NaN	141.412	NaN	111.263	89.0304	NaN	NaN	43.8493	NaN	41.129	NaN	NaN	NaN	NaN	114.165	NaN	NaN	NaN	NaN	35.6334	11.4694	81.6605	31.7407	180.604
	113.364	68.5251	NaN	NaN	NaN	NaN	NaN	NaN	NaN	251.46	138.291	NaN	NaN	NaN	NaN	67.0099	NaN	NaN	NaN	NaN	NaN	NaN	NaN	42.7128	67.9896	NaN	140.144	NaN	107.925	87.5881	NaN	NaN	43.1881	NaN	40.1625	NaN	NaN	NaN	NaN	111.222	NaN	NaN	NaN	NaN	33.2761	12.4746	81.8194	30.2133	178.056
	112.737	68.4515	NaN	NaN	NaN	NaN	NaN	NaN	NaN	254.173	139.75	NaN	NaN	NaN	NaN	68.0671	NaN	NaN	NaN	NaN	NaN	NaN	NaN	43.3316	69.8858	NaN	137.98	NaN	107.345	88.2814	NaN	NaN	45.0959	NaN	42.3219	NaN	NaN	NaN	NaN	111.716	NaN	NaN	NaN	NaN	32.7408	15.5549	82.1815	30.2381	176.428
	112.313	68.2735	NaN	NaN	NaN	NaN	NaN	NaN	NaN	252.983	137.514	NaN	NaN	NaN	NaN	66.1845	NaN	NaN	NaN	NaN	NaN	NaN	NaN	43.2753	68.1028	NaN	146.602	NaN	105.078	87.674	NaN	NaN	44.982	NaN	41.6728	NaN	NaN	NaN	NaN	107.176	NaN	NaN	NaN	NaN	32.1871	14.8089	82.4791	27.7941	172.942
	112.821	68.3064	NaN	NaN	NaN	NaN	NaN	NaN	NaN	253.287	140.217	NaN	NaN	NaN	NaN	67.4538	NaN	NaN	NaN	NaN	NaN	NaN	NaN	45.5444	69.1069	NaN	140.414	NaN	104.903	88.4274	NaN	NaN	44.9042	NaN	43.8429	NaN	NaN	NaN	NaN	107.033	NaN	NaN	NaN	NaN	33.8398	17.1635	81.953	29.3028	173.682
	112.337	68.4835	NaN	NaN	NaN	NaN	NaN	NaN	NaN	252.483	138.996	NaN	NaN	NaN	NaN	64.8498	NaN	NaN	NaN	NaN	NaN	NaN	NaN	45.311	67.4722	NaN	153.883	NaN	103.316	86.9647	NaN	NaN	45.0224	NaN	43.8068	NaN	NaN	NaN	NaN	103.685	NaN	NaN	NaN	NaN	33.5949	16.8055	78.4441	28.836	170.272
	112.278	70.5612	NaN	NaN	NaN	NaN	NaN	NaN	NaN	248.678	141.058	NaN	NaN	NaN	NaN	67.5385	NaN	NaN	NaN	NaN	NaN	NaN	NaN	47.7279	67.9039	NaN	158.778	NaN	103.961	87.5017	NaN	NaN	45.4107	NaN	43.9689	NaN	NaN	NaN	NaN	104.288	NaN	NaN	NaN	NaN	35.5675	17.7248	76.7164	31.5459	168.752
	111.519	72.4282	NaN	NaN	NaN	NaN	NaN	NaN	NaN	248.965	139.843	NaN	NaN	NaN	NaN	67.1258	NaN	NaN	NaN	NaN	NaN	NaN	NaN	47.4623	64.363	NaN	157.532	NaN	102.94	85.5628	NaN	NaN	46.3983	NaN	43.865	NaN	NaN	NaN	NaN	101.925	NaN	NaN	NaN	NaN	35.6513	17.9191	72.5938	31.0907	166.517
	111.778	68.2899	NaN	NaN	NaN	NaN	NaN	NaN	NaN	251.402	139.569	NaN	NaN	NaN	NaN	61.0638	NaN	NaN	NaN	NaN	NaN	NaN	NaN	49.4015	66.0721	NaN	159.56	NaN	104.684	85.9028	NaN	NaN	48.1527	NaN	47.8239	NaN	NaN	NaN	NaN	101.549	NaN	NaN	NaN	NaN	36.3428	18.6404	71.2694	32.9135	164.518
	108.659	68.3949	NaN	NaN	NaN	NaN	NaN	NaN	NaN	249.276	138.854	NaN	NaN	NaN	NaN	57.5571	NaN	NaN	NaN	NaN	NaN	NaN	NaN	51.0127	63.0007	NaN	159.745	NaN	100.089	84.0309	NaN	NaN	50.4108	NaN	48.7331	NaN	NaN	NaN	NaN	98.3264	NaN	NaN	NaN	NaN	36.8306	17.6251	67.5651	32.495	164.18
	107.689	77.2043	NaN	NaN	NaN	NaN	NaN	NaN	NaN	253.097	140.103	NaN	NaN	NaN	NaN	57.8113	NaN	NaN	NaN	NaN	NaN	NaN	NaN	53.5452	64.378	NaN	163.53	NaN	102.797	84.0019	NaN	NaN	50.9897	NaN	53.0938	NaN	NaN	NaN	NaN	99.2133	NaN	NaN	NaN	NaN	38.257	17.2023	66.6321	32.8711	165.062
	105.637	77.7619	NaN	NaN	NaN	NaN	NaN	NaN	NaN	252.749	139.057	NaN	NaN	NaN	NaN	56.1329	NaN	NaN	NaN	NaN	NaN	NaN	NaN	53.2814	62.1864	NaN	165.07	NaN	98.3283	82.8499	NaN	NaN	51.2027	NaN	53.4123	NaN	NaN	NaN	NaN	95.0146	NaN	NaN	NaN	NaN	36.7954	14.8774	62.4338	33.8233	163.237
	106.328	79.5687	NaN	NaN	NaN	NaN	NaN	NaN	NaN	256.746	139.343	NaN	NaN	NaN	NaN	60.5755	NaN	NaN	NaN	NaN	NaN	NaN	NaN	54.055	61.9209	NaN	167.814	NaN	98.0993	83.107	NaN	NaN	53.1919	NaN	55.2096	NaN	NaN	NaN	NaN	94.0224	NaN	NaN	NaN	NaN	37.7282	14.8076	62.2852	35.0426	163.009
	104.752	79.2044	NaN	NaN	NaN	NaN	NaN	NaN	NaN	252.031	137.372	NaN	NaN	NaN	NaN	57.6876	NaN	NaN	NaN	NaN	NaN	NaN	NaN	52.4845	61.5538	NaN	167.619	NaN	95.6389	82.4607	NaN	NaN	51.7899	NaN	54.0537	NaN	NaN	NaN	NaN	91.991	NaN	NaN	NaN	NaN	36.4482	12.3833	60.2102	36.8152	160.755
	104.216	80.4839	NaN	NaN	NaN	NaN	NaN	NaN	NaN	253.73	136.761	NaN	NaN	NaN	NaN	57.6842	NaN	NaN	NaN	NaN	NaN	NaN	NaN	52.741	61.5076	NaN	171.032	NaN	95.2058	82.1925	NaN	NaN	52.1811	NaN	56.5788	NaN	NaN	NaN	NaN	93.6381	NaN	NaN	NaN	NaN	37.2965	11.8643	60.7584	38.0568	160.538
	103.737	81.5945	NaN	NaN	NaN	NaN	NaN	NaN	NaN	249.955	134.45	NaN	NaN	NaN	NaN	59.8922	NaN	NaN	NaN	NaN	NaN	NaN	NaN	49.9204	60.1398	NaN	169.895	NaN	93.6499	80.903	NaN	NaN	49.7659	NaN	55.4194	NaN	NaN	NaN	NaN	91.4752	NaN	NaN	NaN	NaN	34.6898	11.6851	58.6523	38.6324	156.622
	103.855	83.3269	NaN	NaN	NaN	NaN	NaN	NaN	NaN	249.586	133.562	NaN	NaN	NaN	NaN	62.8377	NaN	NaN	NaN	NaN	NaN	NaN	NaN	49.7903	61.0104	NaN	171.161	NaN	94.573	81.0859	NaN	NaN	49.4331	NaN	57.4189	NaN	NaN	NaN	NaN	94.5185	NaN	NaN	NaN	NaN	36.4447	11.932	57.831	40.6654	155.418
	103.301	83.4475	NaN	NaN	NaN	NaN	NaN	NaN	NaN	250.581	133.008	NaN	NaN	NaN	NaN	61.6816	NaN	NaN	NaN	NaN	NaN	NaN	NaN	48.623	59.8211	NaN	166.726	NaN	93.3282	78.9891	NaN	NaN	46.7198	NaN	57.9307	NaN	NaN	NaN	NaN	93.0067	NaN	NaN	NaN	NaN	34.1687	11.9918	56.2536	40.7606	152.836
	103.314	79.8441	NaN	NaN	NaN	NaN	NaN	NaN	NaN	251.525	132.393	NaN	NaN	NaN	NaN	63.2761	NaN	NaN	NaN	NaN	NaN	NaN	NaN	46.9632	61.4513	NaN	168.743	NaN	96.8106	78.508	NaN	NaN	47.1054	NaN	59.2619	NaN	NaN	NaN	NaN	92.6286	NaN	NaN	NaN	NaN	33.6674	13.5928	56.4255	41.0354	151.875
	101.953	85.4102	NaN	NaN	NaN	NaN	NaN	NaN	NaN	251.112	130.231	NaN	NaN	NaN	NaN	60.2842	NaN	NaN	NaN	NaN	NaN	NaN	NaN	47.1817	60.7556	NaN	166.636	NaN	95.2459	77.1141	NaN	NaN	44.8289	NaN	58.9052	NaN	NaN	NaN	NaN	89.9636	NaN	NaN	NaN	NaN	29.9709	14.6379	55.7234	41.1939	149.332
	102.238	86.3689	NaN	NaN	NaN	NaN	NaN	NaN	NaN	252.441	131.422	NaN	NaN	NaN	NaN	61.4601	NaN	NaN	NaN	NaN	NaN	NaN	NaN	48.6989	61.4603	NaN	166.947	NaN	94.4334	77.7916	NaN	NaN	45.31	NaN	61.7794	NaN	NaN	NaN	NaN	89.1438	NaN	NaN	NaN	NaN	30.6597	16.6849	55.3684	40.8922	149.516
	100.541	85.9611	NaN	NaN	NaN	NaN	NaN	NaN	NaN	252.415	130.716	NaN	NaN	NaN	NaN	59.1263	NaN	NaN	NaN	NaN	NaN	NaN	NaN	47.4373	60.2494	NaN	166.747	NaN	91.0059	75.6808	NaN	NaN	43.1045	NaN	60.8619	NaN	NaN	NaN	NaN	85.8695	NaN	NaN	NaN	NaN	27.647	17.2896	55.755	40.9547	147.188
	100.961	86.6053	NaN	NaN	NaN	NaN	NaN	NaN	NaN	253.07	131.958	NaN	NaN	NaN	NaN	61.597	NaN	NaN	NaN	NaN	NaN	NaN	NaN	47.8629	60.709	NaN	167.588	NaN	90.7736	74.7892	NaN	NaN	43.0971	NaN	61.9695	NaN	NaN	NaN	NaN	85.3099	NaN	NaN	NaN	NaN	29.0097	19.0687	56.4637	42.0186	147.236
	99.6445	86.8499	NaN	NaN	NaN	NaN	NaN	NaN	NaN	250.259	131.376	NaN	NaN	NaN	NaN	59.6267	NaN	NaN	NaN	NaN	NaN	NaN	NaN	47.2574	60.0229	NaN	166.978	NaN	88.1758	71.558	NaN	NaN	41.8609	NaN	59.0835	NaN	NaN	NaN	NaN	82.0102	NaN	NaN	NaN	NaN	27.6217	18.9568	52.3959	42.1027	145.858
	99.2815	89.7488	NaN	NaN	NaN	NaN	NaN	NaN	NaN	253.283	133.595	NaN	NaN	NaN	NaN	63.9642	NaN	NaN	NaN	NaN	NaN	NaN	NaN	47.9007	61.2186	NaN	168.494	NaN	88.5149	70.9714	NaN	NaN	41.697	NaN	59.8433	NaN	NaN	NaN	NaN	81.6569	NaN	NaN	NaN	NaN	30.2393	19.1558	55.8217	41.6619	146.009
	97.8153	89.3555	NaN	NaN	NaN	NaN	NaN	NaN	NaN	251.942	130.603	NaN	NaN	NaN	NaN	59.897	NaN	NaN	NaN	NaN	NaN	NaN	NaN	46.7748	61.8646	NaN	167.955	NaN	85.3765	70.0306	NaN	NaN	40.2585	NaN	59.5825	NaN	NaN	NaN	NaN	80.727	NaN	NaN	NaN	NaN	30.5054	19.263	55.5617	41.3664	144.271
	98.2584	92.9789	NaN	NaN	NaN	NaN	NaN	NaN	NaN	252.057	130.35	NaN	NaN	NaN	NaN	61.6063	NaN	NaN	NaN	NaN	NaN	NaN	NaN	47.9811	65.3731	NaN	170.633	NaN	87.1308	70.37	NaN	NaN	40.7651	NaN	59.8915	NaN	NaN	NaN	NaN	80.0918	NaN	NaN	NaN	NaN	32.4024	20.4836	51.9818	40.8325	143.594
	97.647	91.7854	NaN	NaN	NaN	NaN	NaN	NaN	NaN	248.76	128.227	NaN	NaN	NaN	NaN	58.3453	NaN	NaN	NaN	NaN	NaN	NaN	NaN	47.3779	64.3204	NaN	167.711	NaN	82.9383	69.7979	NaN	NaN	40.3524	NaN	58.2663	NaN	NaN	NaN	NaN	79.1985	NaN	NaN	NaN	NaN	31.2996	20.317	51.5992	39.66	144.508
	99.1848	92.1532	NaN	NaN	NaN	NaN	NaN	NaN	NaN	249.068	126.568	NaN	NaN	NaN	NaN	58.9637	NaN	NaN	NaN	NaN	NaN	NaN	NaN	49.6018	66.5468	NaN	168.649	NaN	87.1855	70.5942	NaN	NaN	39.5967	NaN	58.2478	NaN	NaN	NaN	NaN	83.795	NaN	NaN	NaN	NaN	33.0832	20.3347	51.5374	39.0918	145.226
	100.577	91.5769	NaN	NaN	NaN	NaN	NaN	NaN	NaN	252.125	124.843	NaN	NaN	NaN	NaN	59.066	NaN	NaN	NaN	NaN	NaN	NaN	NaN	50.4195	65.4651	NaN	171.827	NaN	86.9457	70.0993	NaN	NaN	40.4799	NaN	58.8908	NaN	NaN	NaN	NaN	78.8384	NaN	NaN	NaN	NaN	37.2363	19.4094	52.3561	37.9044	147.209
	101.525	89.4399	NaN	NaN	NaN	NaN	NaN	NaN	NaN	254.037	123.19	NaN	NaN	NaN	NaN	57.3489	NaN	NaN	NaN	NaN	NaN	NaN	NaN	50.5327	63.6189	NaN	175.101	NaN	78.1912	69.7845	NaN	NaN	43.4218	NaN	60.8682	NaN	NaN	NaN	NaN	77.487	NaN	NaN	NaN	NaN	40.0523	16.473	54.6052	33.235	149.014
	101.813	88.5417	NaN	NaN	NaN	NaN	NaN	NaN	NaN	252.906	121.777	NaN	NaN	NaN	NaN	54.6367	NaN	NaN	NaN	NaN	NaN	NaN	NaN	49.5788	58.3552	NaN	176.604	NaN	75.6607	67.9561	NaN	NaN	43.2768	NaN	59.0789	NaN	NaN	NaN	NaN	76.8675	NaN	NaN	NaN	NaN	41.4989	13.4703	53.8999	30.407	148.149
	104.496	89.845	NaN	NaN	NaN	NaN	NaN	NaN	NaN	254.866	120.646	NaN	NaN	NaN	NaN	58.4101	NaN	NaN	NaN	NaN	NaN	NaN	NaN	52.0942	59.324	NaN	178.548	NaN	75.3618	69.8383	NaN	NaN	45.5351	NaN	55.9433	NaN	NaN	NaN	NaN	77.5899	NaN	NaN	NaN	NaN	32.1914	13.2528	54.5613	32.0418	148.621
	102.405	88.4779	NaN	NaN	NaN	NaN	NaN	NaN	NaN	250.849	118.192	NaN	NaN	NaN	NaN	56.0585	NaN	NaN	NaN	NaN	NaN	NaN	NaN	50.7719	57.8913	NaN	179.653	NaN	73.0604	68.2258	NaN	NaN	46.3695	NaN	54.2994	NaN	NaN	NaN	NaN	77.3151	NaN	NaN	NaN	NaN	47.8265	11.0889	51.4157	30.2518	147.283
	102.741	89.7548	NaN	NaN	NaN	NaN	NaN	NaN	NaN	252.167	118.279	NaN	NaN	NaN	NaN	55.9705	NaN	NaN	NaN	NaN	NaN	NaN	NaN	51.0375	58.8797	NaN	181.67	NaN	73.6061	70.6985	NaN	NaN	49.6989	NaN	54.4811	NaN	NaN	NaN	NaN	78.8269	NaN	NaN	NaN	NaN	50.8834	11.5613	53.7752	30.8621	147.253
	101.629	87.3072	NaN	NaN	NaN	NaN	NaN	NaN	NaN	253.472	115.054	NaN	NaN	NaN	NaN	55.4672	NaN	NaN	NaN	NaN	NaN	NaN	NaN	50.656	57.3469	NaN	180.155	NaN	71.6219	71.7668	NaN	NaN	50.3858	NaN	54.1755	NaN	NaN	NaN	NaN	79.5395	NaN	NaN	NaN	NaN	49.4503	9.01099	49.259	30.1081	145.943
	101.791	90.5014	NaN	NaN	NaN	NaN	NaN	NaN	NaN	253.886	114.384	NaN	NaN	NaN	NaN	55.5572	NaN	NaN	NaN	NaN	NaN	NaN	NaN	52.0088	59.6742	NaN	181.242	NaN	71.7819	72.088	NaN	NaN	53.6199	NaN	56.4596	NaN	NaN	NaN	NaN	79.6247	NaN	NaN	NaN	NaN	50.5822	9.26295	51.6468	30.8809	145.765
	99.8024	87.3707	NaN	NaN	NaN	NaN	NaN	NaN	NaN	248.342	110.423	NaN	NaN	NaN	NaN	55.4594	NaN	NaN	NaN	NaN	NaN	NaN	NaN	52.2063	56.7744	NaN	182.667	NaN	71.3047	71.7846	NaN	NaN	54.0139	NaN	57.0319	NaN	NaN	NaN	NaN	79.8039	NaN	NaN	NaN	NaN	48.8381	9.46182	52.7602	30.3374	144.586
	100.037	87.102	NaN	NaN	NaN	NaN	NaN	NaN	NaN	251.703	110.163	NaN	NaN	NaN	NaN	56.4229	NaN	NaN	NaN	NaN	NaN	NaN	NaN	52.7833	58.557	NaN	184.256	NaN	73.8227	72.9194	NaN	NaN	56.5372	NaN	54.3902	NaN	NaN	NaN	NaN	80.5969	NaN	NaN	NaN	NaN	48.4447	10.8801	53.3795	29.8183	144.413
	99.4274	85	NaN	NaN	NaN	NaN	NaN	NaN	NaN	251.824	107.93	NaN	NaN	NaN	NaN	60.0217	NaN	NaN	NaN	NaN	NaN	NaN	NaN	51.9704	56.5517	NaN	185.28	NaN	70.7512	71.6036	NaN	NaN	55.3057	NaN	61.5125	NaN	NaN	NaN	NaN	79.5181	NaN	NaN	NaN	NaN	45.8528	11.7149	54.6432	28.8022	142.393
	99.3551	86.2141	NaN	NaN	NaN	NaN	NaN	NaN	NaN	253.942	107.799	NaN	NaN	NaN	NaN	62.9997	NaN	NaN	NaN	NaN	NaN	NaN	NaN	53.6564	56.9434	NaN	188.917	NaN	72.0491	72.1387	NaN	NaN	57.515	NaN	66.327	NaN	NaN	NaN	NaN	79.7572	NaN	NaN	NaN	NaN	47.5865	13.9781	56.5419	29.9836	143.299
	98.7476	81.8544	NaN	NaN	NaN	NaN	NaN	NaN	NaN	250.55	105.903	NaN	NaN	NaN	NaN	64.4761	NaN	NaN	NaN	NaN	NaN	NaN	NaN	51.6556	52.9658	NaN	189.552	NaN	69.4873	72.1632	NaN	NaN	56.4421	NaN	66.5206	NaN	NaN	NaN	NaN	78.8447	NaN	NaN	NaN	NaN	45.3121	14.0701	54.848	30.0724	141.652
	98.9755	83.0037	NaN	NaN	NaN	NaN	NaN	NaN	NaN	255.471	105.645	NaN	NaN	NaN	NaN	66.6853	NaN	NaN	NaN	NaN	NaN	NaN	NaN	50.4482	55.7807	NaN	191.458	NaN	69.3874	73.528	NaN	NaN	56.7001	NaN	69.0071	NaN	NaN	NaN	NaN	79.301	NaN	NaN	NaN	NaN	45.9546	15.7184	54.6041	31.6996	142.438
	98.7296	82.0098	NaN	NaN	NaN	NaN	NaN	NaN	NaN	251.763	105.224	NaN	NaN	NaN	NaN	64.141	NaN	NaN	NaN	NaN	NaN	NaN	NaN	48.3224	54.7311	NaN	190.7	NaN	68.0348	73.5863	NaN	NaN	55.8791	NaN	68.3871	NaN	NaN	NaN	NaN	77.3582	NaN	NaN	NaN	NaN	45.2163	16.261	52.0826	31.6815	141.472
	99.8389	85.607	NaN	NaN	NaN	NaN	NaN	NaN	NaN	251.943	106.158	NaN	NaN	NaN	NaN	66.0153	NaN	NaN	NaN	NaN	NaN	NaN	NaN	47.7058	56.3324	NaN	193.181	NaN	69.3786	73.3613	NaN	NaN	56.2735	NaN	70.0749	NaN	NaN	NaN	NaN	79.9293	NaN	NaN	NaN	NaN	45.1033	18.2731	50.9838	32.5339	142.173
	100.011	84.0343	NaN	NaN	NaN	NaN	NaN	NaN	NaN	249.816	104.479	NaN	NaN	NaN	NaN	65.7263	NaN	NaN	NaN	NaN	NaN	NaN	NaN	46.4223	55.1754	NaN	190.314	NaN	69.7615	72.8762	NaN	NaN	53.936	NaN	69.8001	NaN	NaN	NaN	NaN	76.1623	NaN	NaN	NaN	NaN	43.636	19.8859	48.6611	32.0284	142.407
	100.684	79.5148	NaN	NaN	NaN	NaN	NaN	NaN	NaN	251.742	104.977	NaN	NaN	NaN	NaN	66.2518	NaN	NaN	NaN	NaN	NaN	NaN	NaN	46.716	57.1048	NaN	192.879	NaN	72.1781	73.8256	NaN	NaN	52.8888	NaN	72.8135	NaN	NaN	NaN	NaN	77.0461	NaN	NaN	NaN	NaN	43.0024	20.613	47.6268	32.9277	143.716
	101.013	77.8928	NaN	NaN	NaN	NaN	NaN	NaN	NaN	250.343	104.694	NaN	NaN	NaN	NaN	65.0272	NaN	NaN	NaN	NaN	NaN	NaN	NaN	46.6437	54.0648	NaN	191.397	NaN	73.1141	71.2539	NaN	NaN	50.3344	NaN	72.2856	NaN	NaN	NaN	NaN	74.0164	NaN	NaN	NaN	NaN	39.867	20.8571	44.7644	32.5583	144.627
	103.061	76.7293	NaN	NaN	NaN	NaN	NaN	NaN	NaN	253.526	107.247	NaN	NaN	NaN	NaN	65.7688	NaN	NaN	NaN	NaN	NaN	NaN	NaN	47.4762	55.736	NaN	191.77	NaN	74.4874	70.8966	NaN	NaN	50.6928	NaN	73.3105	NaN	NaN	NaN	NaN	73.345	NaN	NaN	NaN	NaN	39.5992	21.9064	44.8584	32.4667	144.479
	102.58	75.3536	NaN	NaN	NaN	NaN	NaN	NaN	NaN	252.18	108.38	NaN	NaN	NaN	NaN	64.1484	NaN	NaN	NaN	NaN	NaN	NaN	NaN	46.6969	54.8027	NaN	190.306	NaN	73.008	67.5448	NaN	NaN	48.9573	NaN	70.2225	NaN	NaN	NaN	NaN	71.2679	NaN	NaN	NaN	NaN	36.5484	22.4287	44.2205	31.2212	142.036
	102.746	75.1715	NaN	NaN	NaN	NaN	NaN	NaN	NaN	254.294	109.991	NaN	NaN	NaN	NaN	67.6394	NaN	NaN	NaN	NaN	NaN	NaN	NaN	46.4798	54.3426	NaN	191.352	NaN	74.3557	66.0991	NaN	NaN	48.0677	NaN	68.7558	NaN	NaN	NaN	NaN	71.2367	NaN	NaN	NaN	NaN	36.926	22.1281	46.1498	31.4071	141.035
	102.951	72.7888	NaN	NaN	NaN	NaN	NaN	NaN	NaN	252.412	110.682	NaN	NaN	NaN	NaN	64.9864	NaN	NaN	NaN	NaN	NaN	NaN	NaN	45.8357	50.661	NaN	190.048	NaN	73.1975	64.2848	NaN	NaN	47.829	NaN	63.872	NaN	NaN	NaN	NaN	69.2062	NaN	NaN	NaN	NaN	35.0503	21.8703	44.6793	31.6617	137.582
	103.306	76.1675	NaN	NaN	NaN	NaN	NaN	NaN	NaN	252.868	113.001	NaN	NaN	NaN	NaN	66.1948	NaN	NaN	NaN	NaN	NaN	NaN	NaN	46.0655	51.1894	NaN	190.347	NaN	73.8836	64.4876	NaN	NaN	47.9013	NaN	62.4585	NaN	NaN	NaN	NaN	69.0635	NaN	NaN	NaN	NaN	34.5275	21.3519	45.5295	32.3362	136.837
	103.997	72.8695	NaN	NaN	NaN	NaN	NaN	NaN	NaN	249.989	111.6	NaN	NaN	NaN	NaN	65.7213	NaN	NaN	NaN	NaN	NaN	NaN	NaN	45.4219	49.1158	NaN	186.077	NaN	70.8123	64.2149	NaN	NaN	47.6872	NaN	59.287	NaN	NaN	NaN	NaN	67.7191	NaN	NaN	NaN	NaN	31.3621	18.0455	45.648	31.2085	134.599
	105.941	73.2764	NaN	NaN	NaN	NaN	NaN	NaN	NaN	250.689	111.523	NaN	NaN	NaN	NaN	65.4355	NaN	NaN	NaN	NaN	NaN	NaN	NaN	45.882	50.2029	NaN	188.925	NaN	70.3974	65.9019	NaN	NaN	47.4608	NaN	59.757	NaN	NaN	NaN	NaN	68.4305	NaN	NaN	NaN	NaN	32.019	17.3446	45.1931	31.6644	134.053
	105.866	69.7727	NaN	NaN	NaN	NaN	NaN	NaN	NaN	246.392	109.097	NaN	NaN	NaN	NaN	63.9933	NaN	NaN	NaN	NaN	NaN	NaN	NaN	45.8458	50.8418	NaN	187.514	NaN	68.3929	65.4796	NaN	NaN	47.5763	NaN	56.5228	NaN	NaN	NaN	NaN	66.5837	NaN	NaN	NaN	NaN	27.2988	14.5396	45.4542	31.5082	133.106
	107.395	70.9944	NaN	NaN	NaN	NaN	NaN	NaN	NaN	250.726	110.006	NaN	NaN	NaN	NaN	64.8933	NaN	NaN	NaN	NaN	NaN	NaN	NaN	45.8463	54.8524	NaN	188.291	NaN	70.4926	65.4576	NaN	NaN	47.5531	NaN	57.2121	NaN	NaN	NaN	NaN	67.8938	NaN	NaN	NaN	NaN	28.5123	13.9376	46.1809	31.34	134.105
	108.051	67.8264	NaN	NaN	NaN	NaN	NaN	NaN	NaN	250.09	109.278	NaN	NaN	NaN	NaN	63.4107	NaN	NaN	NaN	NaN	NaN	NaN	NaN	45.7111	52.5293	NaN	185.623	NaN	66.9668	64.3348	NaN	NaN	47.473	NaN	56.3305	NaN	NaN	NaN	NaN	65.6279	NaN	NaN	NaN	NaN	24.6253	12.3852	47.573	31.0207	133.092
	110.619	66.7236	NaN	NaN	NaN	NaN	NaN	NaN	NaN	251.861	109.689	NaN	NaN	NaN	NaN	64.2891	NaN	NaN	NaN	NaN	NaN	NaN	NaN	46.5476	53.4653	NaN	187.785	NaN	67.9418	64.1928	NaN	NaN	47.0251	NaN	56.0605	NaN	NaN	NaN	NaN	65.1362	NaN	NaN	NaN	NaN	25.4854	13.3557	48.0902	30.7388	135.116
	110.729	65.4837	NaN	NaN	NaN	NaN	NaN	NaN	NaN	253.947	107.838	NaN	NaN	NaN	NaN	65.6168	NaN	NaN	NaN	NaN	NaN	NaN	NaN	46.4579	53.154	NaN	189.286	NaN	66.3084	60.3095	NaN	NaN	46.867	NaN	54.6733	NaN	NaN	NaN	NaN	64.4787	NaN	NaN	NaN	NaN	25.3973	12.4218	48.1327	30.7157	134.38
	111.492	65.9615	NaN	NaN	NaN	NaN	NaN	NaN	NaN	254.656	107.11	NaN	NaN	NaN	NaN	65.6921	NaN	NaN	NaN	NaN	NaN	NaN	NaN	44.354	50.1163	NaN	192.488	NaN	64.5443	58.868	NaN	NaN	44.9009	NaN	54.1023	NaN	NaN	NaN	NaN	65.7655	NaN	NaN	NaN	NaN	26.1443	11.8477	46.2935	30.4687	133.747
	113.096	63.4822	NaN	NaN	NaN	NaN	NaN	NaN	NaN	250.408	105.614	NaN	NaN	NaN	NaN	64.152	NaN	NaN	NaN	NaN	NaN	NaN	NaN	45.7081	49.3927	NaN	191.514	NaN	63.1461	56.9196	NaN	NaN	43.4741	NaN	49.174	NaN	NaN	NaN	NaN	63.3	NaN	NaN	NaN	NaN	24.3241	11.4005	44.5276	28.6243	132.878
	114.527	63.7368	NaN	NaN	NaN	NaN	NaN	NaN	NaN	250.406	104.736	NaN	NaN	NaN	NaN	63.8499	NaN	NaN	NaN	NaN	NaN	NaN	NaN	46.992	49.9983	NaN	192.691	NaN	63.5467	57.6632	NaN	NaN	43.9282	NaN	48.7339	NaN	NaN	NaN	NaN	65.8345	NaN	NaN	NaN	NaN	24.4142	11.1174	42.1296	28.5363	134.245
	115.484	61.2459	NaN	NaN	NaN	NaN	NaN	NaN	NaN	247.375	108.763	NaN	NaN	NaN	NaN	64.9529	NaN	NaN	NaN	NaN	NaN	NaN	NaN	46.8866	49.5826	NaN	192.354	NaN	63.6472	56.5122	NaN	NaN	41.3961	NaN	55.3669	NaN	NaN	NaN	NaN	64.3261	NaN	NaN	NaN	NaN	23.6078	10.4425	39.5284	25.7692	134.047
	116.947	62.0232	NaN	NaN	NaN	NaN	NaN	NaN	NaN	250.385	97.5914	NaN	NaN	NaN	NaN	67.245	NaN	NaN	NaN	NaN	NaN	NaN	NaN	50.3589	51.8983	NaN	193.843	NaN	65.9313	58.0615	NaN	NaN	42.7842	NaN	42.4119	NaN	NaN	NaN	NaN	65.8684	NaN	NaN	NaN	NaN	25.3486	12.2992	39.0726	27.8521	133.85
	116.685	59.1634	NaN	NaN	NaN	NaN	NaN	NaN	NaN	250.321	94.7901	NaN	NaN	NaN	NaN	65.8522	NaN	NaN	NaN	NaN	NaN	NaN	NaN	51.3662	51.6557	NaN	191.954	NaN	64.3135	56.7648	NaN	NaN	43.8329	NaN	40.5795	NaN	NaN	NaN	NaN	65.258	NaN	NaN	NaN	NaN	26.0542	12.5259	34.8159	26.0272	132.738
	117.842	58.0187	NaN	NaN	NaN	NaN	NaN	NaN	NaN	252.375	95.104	NaN	NaN	NaN	NaN	65.4855	NaN	NaN	NaN	NaN	NaN	NaN	NaN	53.4059	53.7592	NaN	195.581	NaN	65.6211	58.3039	NaN	NaN	44.8376	NaN	40.9048	NaN	NaN	NaN	NaN	65.1875	NaN	NaN	NaN	NaN	26.5833	14.469	37.3653	25.8345	133.268
	115.844	55.4023	NaN	NaN	NaN	NaN	NaN	NaN	NaN	248.036	92.8379	NaN	NaN	NaN	NaN	65.0751	NaN	NaN	NaN	NaN	NaN	NaN	NaN	54.2476	53.9797	NaN	195.963	NaN	64.2969	58.7593	NaN	NaN	46.0839	NaN	40.1392	NaN	NaN	NaN	NaN	63.301	NaN	NaN	NaN	NaN	25.9174	15.464	33.8723	23.571	132.543
	116.004	55.0636	NaN	NaN	NaN	NaN	NaN	NaN	NaN	252.468	93.2239	NaN	NaN	NaN	NaN	64.9626	NaN	NaN	NaN	NaN	NaN	NaN	NaN	54.5809	53.9094	NaN	199.001	NaN	65.5493	59.8049	NaN	NaN	47.6062	NaN	40.4678	NaN	NaN	NaN	NaN	62.6972	NaN	NaN	NaN	NaN	29.0835	16.6988	38.5052	24.7854	132.147
	114.057	53.5014	NaN	NaN	NaN	NaN	NaN	NaN	NaN	249.45	90.592	NaN	NaN	NaN	NaN	62.6613	NaN	NaN	NaN	NaN	NaN	NaN	NaN	53.7203	51.8355	NaN	198.891	NaN	64.6486	59.8031	NaN	NaN	48.307	NaN	40.336	NaN	NaN	NaN	NaN	60.7605	NaN	NaN	NaN	NaN	27.5227	16.5417	34.4564	24.9894	129.944
	115.34	58.5911	NaN	NaN	NaN	NaN	NaN	NaN	NaN	251.824	91.1439	NaN	NaN	NaN	NaN	62.6479	NaN	NaN	NaN	NaN	NaN	NaN	NaN	53.6059	55.2633	NaN	201.528	NaN	64.6347	61.8339	NaN	NaN	49.7656	NaN	41.2093	NaN	NaN	NaN	NaN	62.8653	NaN	NaN	NaN	NaN	28.1932	16.9231	35.7499	25.3676	129.14
	112.641	56.7105	NaN	NaN	NaN	NaN	NaN	NaN	NaN	248.84	88.9965	NaN	NaN	NaN	NaN	61.8057	NaN	NaN	NaN	NaN	NaN	NaN	NaN	53.4803	52.7568	NaN	200.898	NaN	63.8644	60.127	NaN	NaN	50.3755	NaN	40.264	NaN	NaN	NaN	NaN	58.8122	NaN	NaN	NaN	NaN	28.3285	17.195	32.6861	23.9995	128.55
	112.155	53.9904	NaN	NaN	NaN	NaN	NaN	NaN	NaN	249.249	88.832	NaN	NaN	NaN	NaN	61.8936	NaN	NaN	NaN	NaN	NaN	NaN	NaN	53.2113	57.1904	NaN	202.038	NaN	65.6205	59.9136	NaN	NaN	51.6594	NaN	41.7769	NaN	NaN	NaN	NaN	59.891	NaN	NaN	NaN	NaN	30.5064	19.2571	33.9792	23.5419	128.937
	111.452	52.7316	NaN	NaN	NaN	NaN	NaN	NaN	NaN	248.91	88.0171	NaN	NaN	NaN	NaN	61.905	NaN	NaN	NaN	NaN	NaN	NaN	NaN	52.6694	55.3682	NaN	201.531	NaN	64.4139	58.3505	NaN	NaN	53.5825	NaN	41.4942	NaN	NaN	NaN	NaN	58.3729	NaN	NaN	NaN	NaN	30.557	18.3039	34.1221	22.7421	129.188
	111.552	54.4716	NaN	NaN	NaN	NaN	NaN	NaN	NaN	250.16	88.1236	NaN	NaN	NaN	NaN	61.818	NaN	NaN	NaN	NaN	NaN	NaN	NaN	53.0312	57.3839	NaN	202.845	NaN	66.693	58.3151	NaN	NaN	56.9117	NaN	42.1495	NaN	NaN	NaN	NaN	58.2309	NaN	NaN	NaN	NaN	32.5728	19.2518	35.1031	23.7936	131.671
	110.921	52.1647	NaN	NaN	NaN	NaN	NaN	NaN	NaN	248.051	86.2698	NaN	NaN	NaN	NaN	62.4967	NaN	NaN	NaN	NaN	NaN	NaN	NaN	53.2458	57.5776	NaN	203.924	NaN	65.2964	55.3597	NaN	NaN	57.9535	NaN	41.2701	NaN	NaN	NaN	NaN	57.8295	NaN	NaN	NaN	NaN	30.7674	18.3866	34.218	22.2917	132.387
	111.54	52.2607	NaN	NaN	NaN	NaN	NaN	NaN	NaN	249.804	86.0032	NaN	NaN	NaN	NaN	63.9973	NaN	NaN	NaN	NaN	NaN	NaN	NaN	54.8695	57.0727	NaN	204.924	NaN	64.7424	55.099	NaN	NaN	60.772	NaN	40.5559	NaN	NaN	NaN	NaN	57.5967	NaN	NaN	NaN	NaN	29.4174	18.588	38.1299	22.452	135.071
	111.595	50.8342	NaN	NaN	NaN	NaN	NaN	NaN	NaN	249.145	82.0873	NaN	NaN	NaN	NaN	64.1709	NaN	NaN	NaN	NaN	NaN	NaN	NaN	54.6644	55.6014	NaN	204.87	NaN	65.0172	53.047	NaN	NaN	60.2518	NaN	38.647	NaN	NaN	NaN	NaN	56.2542	NaN	NaN	NaN	NaN	40.0915	15.1214	37.8618	22.6511	136.646
	111.588	51.7914	NaN	NaN	NaN	NaN	NaN	NaN	NaN	250.305	81.5372	NaN	NaN	NaN	NaN	67.7298	NaN	NaN	NaN	NaN	NaN	NaN	NaN	55.3193	56.938	NaN	205.773	NaN	64.4889	52.5253	NaN	NaN	61.5322	NaN	38.656	NaN	NaN	NaN	NaN	56.3479	NaN	NaN	NaN	NaN	31.5649	14.5715	39.5625	24.0939	138.923
	111.609	51.8324	NaN	NaN	NaN	NaN	NaN	NaN	NaN	247.818	79.5232	NaN	NaN	NaN	NaN	70.7989	NaN	NaN	NaN	NaN	NaN	NaN	NaN	53.9388	56.5242	NaN	205.817	NaN	61.0478	50.4672	NaN	NaN	61.3604	NaN	36.8546	NaN	NaN	NaN	NaN	55.6632	NaN	NaN	NaN	NaN	45.2545	18.8192	38.3567	22.7796	138.595
	113.183	53.6066	NaN	NaN	NaN	NaN	NaN	NaN	NaN	248.748	80.66	NaN	NaN	NaN	NaN	63.247	NaN	NaN	NaN	NaN	NaN	NaN	NaN	54.0291	57.6078	NaN	206.146	NaN	60.5471	50.4447	NaN	NaN	61.276	NaN	36.2749	NaN	NaN	NaN	NaN	55.9764	NaN	NaN	NaN	NaN	47.4949	6.55561	41.2056	23.0497	142.09
	114.002	52.7694	NaN	NaN	NaN	NaN	NaN	NaN	NaN	247.074	78.2008	NaN	NaN	NaN	NaN	64.0841	NaN	NaN	NaN	NaN	NaN	NaN	NaN	54.2548	55.8216	NaN	204.047	NaN	56.9933	49.4952	NaN	NaN	59.2461	NaN	33.0116	NaN	NaN	NaN	NaN	55.6231	NaN	NaN	NaN	NaN	46.3499	3.66928	40.5199	21.0751	142.712
	114.361	53.5653	NaN	NaN	NaN	NaN	NaN	NaN	NaN	249.486	77.7659	NaN	NaN	NaN	NaN	65.9504	NaN	NaN	NaN	NaN	NaN	NaN	NaN	54.1713	57.129	NaN	203.6	NaN	57.0218	50.1603	NaN	NaN	61.9036	NaN	33.6513	NaN	NaN	NaN	NaN	55.9067	NaN	NaN	NaN	NaN	48.6267	2.48472	41.235	20.9569	145.689
	115.068	53.1432	NaN	NaN	NaN	NaN	NaN	NaN	NaN	246.956	75.3941	NaN	NaN	NaN	NaN	69.2644	NaN	NaN	NaN	NaN	NaN	NaN	NaN	54.1038	52.2799	NaN	201.142	NaN	53.3144	49.857	NaN	NaN	60.6997	NaN	30.4731	NaN	NaN	NaN	NaN	54.763	NaN	NaN	NaN	NaN	45.9089	1.2693	39.4964	17.7658	146.668
	116.273	53.342	NaN	NaN	NaN	NaN	NaN	NaN	NaN	249.927	76.267	NaN	NaN	NaN	NaN	67.023	NaN	NaN	NaN	NaN	NaN	NaN	NaN	55.7624	52.283	NaN	200.378	NaN	60.7974	49.9589	NaN	NaN	62.2944	NaN	29.8846	NaN	NaN	NaN	NaN	54.5281	NaN	NaN	NaN	NaN	46.3193	2.04799	39.5273	17.1852	148.693
	115.948	50.9821	NaN	NaN	NaN	NaN	NaN	NaN	NaN	249.628	74.3521	NaN	NaN	NaN	NaN	64.2363	NaN	NaN	NaN	NaN	NaN	NaN	NaN	53.9272	50.4657	NaN	205.097	NaN	67.3966	48.6559	NaN	NaN	61.4024	NaN	26.3428	NaN	NaN	NaN	NaN	53.5804	NaN	NaN	NaN	NaN	42.1843	2.36113	37.965	14.2614	149.232
	117.108	50.3065	NaN	NaN	NaN	NaN	NaN	NaN	NaN	251.226	74.8021	NaN	NaN	NaN	NaN	67.2274	NaN	NaN	NaN	NaN	NaN	NaN	NaN	54.2037	51.4726	NaN	195.399	NaN	64.0866	49.3044	NaN	NaN	63.9524	NaN	27.4604	NaN	NaN	NaN	NaN	53.6267	NaN	NaN	NaN	NaN	41.7428	2.16258	37.9786	14.6968	149.948
	116.346	48.111	NaN	NaN	NaN	NaN	NaN	NaN	NaN	249.904	77.2268	NaN	NaN	NaN	NaN	66.2229	NaN	NaN	NaN	NaN	NaN	NaN	NaN	53.555	46.9356	NaN	202.371	NaN	65.2077	47.8446	NaN	NaN	62.0346	NaN	24.933	NaN	NaN	NaN	NaN	52.4069	NaN	NaN	NaN	NaN	38.4417	1.63646	36.4747	12.5083	149.349
	117.113	47.2861	NaN	NaN	NaN	NaN	NaN	NaN	NaN	249.406	78.3331	NaN	NaN	NaN	NaN	68.9495	NaN	NaN	NaN	NaN	NaN	NaN	NaN	53.2851	46.1994	NaN	187.606	NaN	64.0227	47.2641	NaN	NaN	64.9473	NaN	25.6027	NaN	NaN	NaN	NaN	52.3184	NaN	NaN	NaN	NaN	41.2643	2.85536	36.9161	13.3088	149.66
	117.431	47.3541	NaN	NaN	NaN	NaN	NaN	NaN	NaN	249.384	78.473	NaN	NaN	NaN	NaN	70.8717	NaN	NaN	NaN	NaN	NaN	NaN	NaN	53.1153	45.3326	NaN	183.376	NaN	64.8442	47.5093	NaN	NaN	64.953	NaN	24.394	NaN	NaN	NaN	NaN	55.7756	NaN	NaN	NaN	NaN	36.9683	3.17323	37.4625	14.5126	148.049
	116.995	50.6443	NaN	NaN	NaN	NaN	NaN	NaN	NaN	249.6	81.0022	NaN	NaN	NaN	NaN	65.7318	NaN	NaN	NaN	NaN	NaN	NaN	NaN	52.3408	44.9368	NaN	179.353	NaN	64.464	47.5353	NaN	NaN	64.5061	NaN	19.9994	NaN	NaN	NaN	NaN	58.2955	NaN	NaN	NaN	NaN	34.9028	2.92503	37.8851	15.0002	145.284
	115.657	49.2088	NaN	NaN	NaN	NaN	NaN	NaN	NaN	247.23	79.1042	NaN	NaN	NaN	NaN	66.7251	NaN	NaN	NaN	NaN	NaN	NaN	NaN	51.8903	42.1271	NaN	198.885	NaN	63.9255	47.6298	NaN	NaN	66.2532	NaN	21.5203	NaN	NaN	NaN	NaN	54.5966	NaN	NaN	NaN	NaN	32.4539	2.71627	38.5771	13.422	140.987
	115.996	47.974	NaN	NaN	NaN	NaN	NaN	NaN	NaN	249.223	79.0573	NaN	NaN	NaN	NaN	68.607	NaN	NaN	NaN	NaN	NaN	NaN	NaN	52.7388	46.5675	NaN	170.258	NaN	64.6044	49.2391	NaN	NaN	70.7018	NaN	24.4916	NaN	NaN	NaN	NaN	53.7345	NaN	NaN	NaN	NaN	32.1343	2.98063	41.168	14.3154	140.299
	114.342	46.2107	NaN	NaN	NaN	NaN	NaN	NaN	NaN	248.836	78.5016	NaN	NaN	NaN	NaN	66.7459	NaN	NaN	NaN	NaN	NaN	NaN	NaN	51.897	45.766	NaN	185.491	NaN	64.4316	50.2139	NaN	NaN	70.363	NaN	24.9617	NaN	NaN	NaN	NaN	52.4116	NaN	NaN	NaN	NaN	28.2938	4.4104	37.5516	14.3274	136.658
	113.637	47.2374	NaN	NaN	NaN	NaN	NaN	NaN	NaN	252.942	79.2949	NaN	NaN	NaN	NaN	66.7948	NaN	NaN	NaN	NaN	NaN	NaN	NaN	52.15	41.9645	NaN	164.02	NaN	64.5507	50.9645	NaN	NaN	71.7985	NaN	29.4979	NaN	NaN	NaN	NaN	54.0656	NaN	NaN	NaN	NaN	29.9879	4.90287	37.3391	15.0211	136.932
	112.49	46.5383	NaN	NaN	NaN	NaN	NaN	NaN	NaN	253.212	80.0027	NaN	NaN	NaN	NaN	66.2285	NaN	NaN	NaN	NaN	NaN	NaN	NaN	50.2457	39.1186	NaN	189.119	NaN	63.0349	49.4062	NaN	NaN	71.1308	NaN	30.2419	NaN	NaN	NaN	NaN	53.9442	NaN	NaN	NaN	NaN	30.9347	3.78249	35.1735	14.6774	132.675
	112.087	47.2146	NaN	NaN	NaN	NaN	NaN	NaN	NaN	253.185	81.4374	NaN	NaN	NaN	NaN	67.666	NaN	NaN	NaN	NaN	NaN	NaN	NaN	50.0431	38.8509	NaN	172.147	NaN	63.4949	49.5846	NaN	NaN	71.8088	NaN	32.0766	NaN	NaN	NaN	NaN	53.977	NaN	NaN	NaN	NaN	31.7329	4.51217	34.5978	15.9918	133.263
	109.297	45.9383	NaN	NaN	NaN	NaN	NaN	NaN	NaN	251.204	82.6762	NaN	NaN	NaN	NaN	67.6764	NaN	NaN	NaN	NaN	NaN	NaN	NaN	47.2602	36.353	NaN	155.175	NaN	63.0228	49.1616	NaN	NaN	71.6995	NaN	30.7476	NaN	NaN	NaN	NaN	55.0393	NaN	NaN	NaN	NaN	30.4547	3.72284	32.2937	15.8528	138.478
	108.677	46.3867	NaN	NaN	NaN	NaN	NaN	NaN	NaN	252.522	84.3852	NaN	NaN	NaN	NaN	66.7704	NaN	NaN	NaN	NaN	NaN	NaN	NaN	46.5045	36.1548	NaN	153.57	NaN	63.2035	48.1555	NaN	NaN	72.2723	NaN	31.2828	NaN	NaN	NaN	NaN	57.9397	NaN	NaN	NaN	NaN	31.5981	3.62076	33.4646	18.6514	126.74
	106.465	45.0477	NaN	NaN	NaN	NaN	NaN	NaN	NaN	250.278	83.8566	NaN	NaN	NaN	NaN	66.5117	NaN	NaN	NaN	NaN	NaN	NaN	NaN	44.547	35.2347	NaN	150.738	NaN	61.8545	46.1199	NaN	NaN	72.5011	NaN	30.2086	NaN	NaN	NaN	NaN	55.5948	NaN	NaN	NaN	NaN	30.1858	3.54918	31.0546	17.891	123.76
	105.586	46.7112	NaN	NaN	NaN	NaN	NaN	NaN	NaN	251.196	83.6198	NaN	NaN	NaN	NaN	66.9473	NaN	NaN	NaN	NaN	NaN	NaN	NaN	44.571	38.8581	NaN	150.014	NaN	62.2391	46.8963	NaN	NaN	73.5846	NaN	30.1369	NaN	NaN	NaN	NaN	56.2924	NaN	NaN	NaN	NaN	30.3466	3.76418	30.8559	17.2641	123.052
	102.94	45.1979	NaN	NaN	NaN	NaN	NaN	NaN	NaN	249.894	83.1792	NaN	NaN	NaN	NaN	67.6712	NaN	NaN	NaN	NaN	NaN	NaN	NaN	42.855	37.984	NaN	148.394	NaN	61.6496	45.1739	NaN	NaN	71.6793	NaN	30.0406	NaN	NaN	NaN	NaN	54.8592	NaN	NaN	NaN	NaN	30.0312	3.76796	28.2644	16.0243	121.311
	102.833	45.0342	NaN	NaN	NaN	NaN	NaN	NaN	NaN	250.169	80.9123	NaN	NaN	NaN	NaN	65.5447	NaN	NaN	NaN	NaN	NaN	NaN	NaN	44.2432	40.7131	NaN	148.21	NaN	61.2582	46.6505	NaN	NaN	72.6892	NaN	30.1381	NaN	NaN	NaN	NaN	56.6459	NaN	NaN	NaN	NaN	30.8451	4.2431	28.3637	15.5167	122.354
	99.5897	44.2219	NaN	NaN	NaN	NaN	NaN	NaN	NaN	251.287	79.9079	NaN	NaN	NaN	NaN	62.4623	NaN	NaN	NaN	NaN	NaN	NaN	NaN	43.6774	39.9001	NaN	146.953	NaN	62.5769	44.5798	NaN	NaN	68.9351	NaN	31.4691	NaN	NaN	NaN	NaN	54.7435	NaN	NaN	NaN	NaN	30.9764	4.63183	26.2192	14.3035	120.432
	97.8965	44.332	NaN	NaN	NaN	NaN	NaN	NaN	NaN	252.412	79.875	NaN	NaN	NaN	NaN	62.0984	NaN	NaN	NaN	NaN	NaN	NaN	NaN	43.5842	41.3204	NaN	148.004	NaN	62.678	45.5467	NaN	NaN	67.5885	NaN	33.3144	NaN	NaN	NaN	NaN	54.8697	NaN	NaN	NaN	NaN	32.3765	6.99453	25.7134	13.7499	119.558
	95.1183	43.427	NaN	NaN	NaN	NaN	NaN	NaN	NaN	251.531	78.9362	NaN	NaN	NaN	NaN	59.7677	NaN	NaN	NaN	NaN	NaN	NaN	NaN	43.1025	40.696	NaN	147.318	NaN	61.0253	45.5541	NaN	NaN	64.3959	NaN	34.3568	NaN	NaN	NaN	NaN	53.6848	NaN	NaN	NaN	NaN	33.1296	7.80402	23.8995	12.3365	116.803
	93.8832	44.0959	NaN	NaN	NaN	NaN	NaN	NaN	NaN	252.506	79.7477	NaN	NaN	NaN	NaN	60.9561	NaN	NaN	NaN	NaN	NaN	NaN	NaN	43.2566	43.362	NaN	149.562	NaN	60.8774	45.0195	NaN	NaN	63.8883	NaN	36.6083	NaN	NaN	NaN	NaN	53.2404	NaN	NaN	NaN	NaN	34.1101	10.8194	24.6859	12.351	116.687
	91.7052	43.9458	NaN	NaN	NaN	NaN	NaN	NaN	NaN	251.6	78.2589	NaN	NaN	NaN	NaN	59.4338	NaN	NaN	NaN	NaN	NaN	NaN	NaN	43.5198	43.2142	NaN	149.163	NaN	59.5789	44.3	NaN	NaN	60.9067	NaN	36.4546	NaN	NaN	NaN	NaN	51.7773	NaN	NaN	NaN	NaN	33.7969	9.96068	24.1013	11.9019	114.441
	90.6318	44.277	NaN	NaN	NaN	NaN	NaN	NaN	NaN	251.216	79.3717	NaN	NaN	NaN	NaN	59.1777	NaN	NaN	NaN	NaN	NaN	NaN	NaN	44.5355	44.5719	NaN	150.225	NaN	59.4606	44.915	NaN	NaN	60.8111	NaN	37.778	NaN	NaN	NaN	NaN	52.3253	NaN	NaN	NaN	NaN	33.5866	9.94877	26.842	12.3933	113.438
	88.44	43.8795	NaN	NaN	NaN	NaN	NaN	NaN	NaN	250.407	78.5764	NaN	NaN	NaN	NaN	58.2469	NaN	NaN	NaN	NaN	NaN	NaN	NaN	44.8628	43.4189	NaN	150.112	NaN	57.6081	45.0997	NaN	NaN	59.8711	NaN	37.2693	NaN	NaN	NaN	NaN	50.8535	NaN	NaN	NaN	NaN	33.5101	8.09103	24.6842	11.8723	111.737
	88.1226	45.237	NaN	NaN	NaN	NaN	NaN	NaN	NaN	250.785	77.942	NaN	NaN	NaN	NaN	58.321	NaN	NaN	NaN	NaN	NaN	NaN	NaN	48.1023	45.4067	NaN	150.296	NaN	58.8081	45.5086	NaN	NaN	62.0667	NaN	37.9045	NaN	NaN	NaN	NaN	53.0636	NaN	NaN	NaN	NaN	33.1875	9.72342	24.5735	11.1938	111.396
	87.1731	44.4953	NaN	NaN	NaN	NaN	NaN	NaN	NaN	251.458	76.3583	NaN	NaN	NaN	NaN	57.7473	NaN	NaN	NaN	NaN	NaN	NaN	NaN	47.5805	43.9613	NaN	151.502	NaN	56.7464	43.983	NaN	NaN	58.7112	NaN	38.2861	NaN	NaN	NaN	NaN	50.0347	NaN	NaN	NaN	NaN	31.8312	8.78672	25.5626	10.466	110.358
	88.1356	44.2182	NaN	NaN	NaN	NaN	NaN	NaN	NaN	254.317	75.8138	NaN	NaN	NaN	NaN	57.0617	NaN	NaN	NaN	NaN	NaN	NaN	NaN	51.0397	45.0238	NaN	152.376	NaN	58.2484	44.1958	NaN	NaN	59.4091	NaN	39.4325	NaN	NaN	NaN	NaN	49.2776	NaN	NaN	NaN	NaN	31.6714	9.11456	25.7098	9.94339	111.801
	86.8668	41.3197	NaN	NaN	NaN	NaN	NaN	NaN	NaN	252.413	73.764	NaN	NaN	NaN	NaN	56.3573	NaN	NaN	NaN	NaN	NaN	NaN	NaN	50.2853	43.6404	NaN	151.657	NaN	56.6762	42.9103	NaN	NaN	57.6494	NaN	39.7998	NaN	NaN	NaN	NaN	48.5118	NaN	NaN	NaN	NaN	29.3326	7.91743	25.6795	9.13263	110.687
	86.615	41.1292	NaN	NaN	NaN	NaN	NaN	NaN	NaN	253.086	73.31	NaN	NaN	NaN	NaN	56.3016	NaN	NaN	NaN	NaN	NaN	NaN	NaN	49.52	44.0374	NaN	154.294	NaN	57.2946	43.2169	NaN	NaN	57.4652	NaN	41.8231	NaN	NaN	NaN	NaN	48.5232	NaN	NaN	NaN	NaN	30.0171	8.45166	25.9378	11.3995	110.49
	84.9273	39.3068	NaN	NaN	NaN	NaN	NaN	NaN	NaN	251.121	71.5805	NaN	NaN	NaN	NaN	56.6879	NaN	NaN	NaN	NaN	NaN	NaN	NaN	46.2287	40.6042	NaN	152.181	NaN	55.128	39.9196	NaN	NaN	55.2887	NaN	42.4348	NaN	NaN	NaN	NaN	47.1981	NaN	NaN	NaN	NaN	28.1576	6.87356	25.834	12.386	108.708
	84.9872	41.3353	NaN	NaN	NaN	NaN	NaN	NaN	NaN	249.778	71.9596	NaN	NaN	NaN	NaN	57.3523	NaN	NaN	NaN	NaN	NaN	NaN	NaN	45.3799	41.1293	NaN	153.008	NaN	55.2611	39.8829	NaN	NaN	54.9656	NaN	41.5924	NaN	NaN	NaN	NaN	46.6562	NaN	NaN	NaN	NaN	28.5925	8.15217	26.9746	13.3286	107.229
	84.5011	40.5038	NaN	NaN	NaN	NaN	NaN	NaN	NaN	246.495	71.9535	NaN	NaN	NaN	NaN	58.7243	NaN	NaN	NaN	NaN	NaN	NaN	NaN	41.5551	37.2204	NaN	150.934	NaN	54.9858	37.8096	NaN	NaN	53.0375	NaN	40.7335	NaN	NaN	NaN	NaN	45.5014	NaN	NaN	NaN	NaN	26.7765	7.39802	27.477	12.9465	103.491
	85.5781	43.6612	NaN	NaN	NaN	NaN	NaN	NaN	NaN	246.828	72.2957	NaN	NaN	NaN	NaN	60.1225	NaN	NaN	NaN	NaN	NaN	NaN	NaN	41.7097	39.3883	NaN	149.678	NaN	56.9854	37.8575	NaN	NaN	53.3618	NaN	40.3348	NaN	NaN	NaN	NaN	46.1665	NaN	NaN	NaN	NaN	26.3728	7.32517	29.5515	12.7129	102.644
	86.4137	42.2663	NaN	NaN	NaN	NaN	NaN	NaN	NaN	246.944	71.8535	NaN	NaN	NaN	NaN	59.3011	NaN	NaN	NaN	NaN	NaN	NaN	NaN	41.5032	41.8232	NaN	147.968	NaN	60.1475	37.2333	NaN	NaN	52.4427	NaN	38.4165	NaN	NaN	NaN	NaN	47.0431	NaN	NaN	NaN	NaN	25.7313	7.61983	29.1772	12.3252	101.675
	87.7883	39.1377	NaN	NaN	NaN	NaN	NaN	NaN	NaN	250.45	68.7524	NaN	NaN	NaN	NaN	58.4509	NaN	NaN	NaN	NaN	NaN	NaN	NaN	41.5546	39.0243	NaN	148.133	NaN	60.0329	38.2536	NaN	NaN	52.2716	NaN	35.1524	NaN	NaN	NaN	NaN	51.4331	NaN	NaN	NaN	NaN	23.6585	5.81062	26.4043	8.22096	98.9781
	87.5304	38.2108	NaN	NaN	NaN	NaN	NaN	NaN	NaN	250.942	64.9256	NaN	NaN	NaN	NaN	56.3931	NaN	NaN	NaN	NaN	NaN	NaN	NaN	41.9239	36.7479	NaN	147.571	NaN	62.0219	37.6612	NaN	NaN	50.6265	NaN	31.202	NaN	NaN	NaN	NaN	49.8404	NaN	NaN	NaN	NaN	22.9921	5.71701	52.3484	8.07559	96.5889
	90.5954	38.4699	NaN	NaN	NaN	NaN	NaN	NaN	NaN	253.702	64.3047	NaN	NaN	NaN	NaN	56.8712	NaN	NaN	NaN	NaN	NaN	NaN	NaN	43.3915	38.7108	NaN	148.509	NaN	62.3262	39.0157	NaN	NaN	50.5341	NaN	32.3445	NaN	NaN	NaN	NaN	50.1968	NaN	NaN	NaN	NaN	24.7208	6.19295	28.5143	8.13549	95.9861
	90.0527	37.8424	NaN	NaN	NaN	NaN	NaN	NaN	NaN	250.254	63.2385	NaN	NaN	NaN	NaN	57.6086	NaN	NaN	NaN	NaN	NaN	NaN	NaN	43.5706	36.9916	NaN	148.954	NaN	62.81	38.2131	NaN	NaN	49.9567	NaN	28.5761	NaN	NaN	NaN	NaN	49.3723	NaN	NaN	NaN	NaN	24.5102	5.49051	26.5937	8.33847	94.1418
	90.212	38.305	NaN	NaN	NaN	NaN	NaN	NaN	NaN	252.342	64.3344	NaN	NaN	NaN	NaN	58.6606	NaN	NaN	NaN	NaN	NaN	NaN	NaN	45.493	36.7288	NaN	151.81	NaN	62.785	39.2025	NaN	NaN	50.0474	NaN	28.2966	NaN	NaN	NaN	NaN	50.0078	NaN	NaN	NaN	NaN	25.2172	6.01801	26.3427	10.2352	94.681
	89.575	37.9803	NaN	NaN	NaN	NaN	NaN	NaN	NaN	250.696	61.3767	NaN	NaN	NaN	NaN	58.3985	NaN	NaN	NaN	NaN	NaN	NaN	NaN	45.7211	35.9279	NaN	149.872	NaN	61.6423	38.5981	NaN	NaN	49.2637	NaN	26.8343	NaN	NaN	NaN	NaN	49.3116	NaN	NaN	NaN	NaN	23.4522	6.05347	24.3551	10.7623	91.799
	89.6706	38.3404	NaN	NaN	NaN	NaN	NaN	NaN	NaN	249.05	63.0026	NaN	NaN	NaN	NaN	61.8099	NaN	NaN	NaN	NaN	NaN	NaN	NaN	47.0589	35.5257	NaN	152.566	NaN	60.3535	40.3598	NaN	NaN	49.3774	NaN	26.6316	NaN	NaN	NaN	NaN	51.054	NaN	NaN	NaN	NaN	25.3414	6.62786	24.1545	11.5442	92.2457
	88.3844	38.5648	NaN	NaN	NaN	NaN	NaN	NaN	NaN	246.286	60.2897	NaN	NaN	NaN	NaN	60.0521	NaN	NaN	NaN	NaN	NaN	NaN	NaN	47.7642	34.1912	NaN	151.08	NaN	58.637	39.2652	NaN	NaN	49.4794	NaN	26.4306	NaN	NaN	NaN	NaN	50.8745	NaN	NaN	NaN	NaN	23.0705	5.97506	22.1196	11.7811	88.9603
	88.9869	41.1251	NaN	NaN	NaN	NaN	NaN	NaN	NaN	246.261	60.244	NaN	NaN	NaN	NaN	60.9618	NaN	NaN	NaN	NaN	NaN	NaN	NaN	47.2607	36.5084	NaN	152.833	NaN	60.2581	41.1354	NaN	NaN	50.6446	NaN	26.5092	NaN	NaN	NaN	NaN	53.6729	NaN	NaN	NaN	NaN	22.9911	7.76005	20.5086	11.2636	89.135
	88.1224	36.2342	NaN	NaN	NaN	NaN	NaN	NaN	NaN	246.598	58.2895	NaN	NaN	NaN	NaN	61.8558	NaN	NaN	NaN	NaN	NaN	NaN	NaN	45.8457	35.3456	NaN	152.737	NaN	56.5858	39.0078	NaN	NaN	49.2701	NaN	27.2523	NaN	NaN	NaN	NaN	52.3692	NaN	NaN	NaN	NaN	25.7283	8.65256	21.3739	11.4559	87.7794
	88.4207	37.2306	NaN	NaN	NaN	NaN	NaN	NaN	NaN	249.873	58.4704	NaN	NaN	NaN	NaN	62.3807	NaN	NaN	NaN	NaN	NaN	NaN	NaN	46.0181	37.2324	NaN	154.691	NaN	59.4089	38.2864	NaN	NaN	49.8055	NaN	28.8105	NaN	NaN	NaN	NaN	55.5235	NaN	NaN	NaN	NaN	26.32	11.4628	19.9008	11.45	89.3344
	88.6102	35.154	NaN	NaN	NaN	NaN	NaN	NaN	NaN	251.297	56.778	NaN	NaN	NaN	NaN	60.8841	NaN	NaN	NaN	NaN	NaN	NaN	NaN	43.8722	34.3619	NaN	156.437	NaN	59.4953	36.4445	NaN	NaN	48.6991	NaN	28.8539	NaN	NaN	NaN	NaN	53.54	NaN	NaN	NaN	NaN	25.5835	11.2769	19.2907	11.1489	89.1294
	89.4989	35.6012	NaN	NaN	NaN	NaN	NaN	NaN	NaN	255.186	58.0606	NaN	NaN	NaN	NaN	60.507	NaN	NaN	NaN	NaN	NaN	NaN	NaN	43.206	35.1032	NaN	159.113	NaN	52.0583	36.074	NaN	NaN	48.5838	NaN	31.1497	NaN	NaN	NaN	NaN	54.2221	NaN	NaN	NaN	NaN	29.1045	12.8865	18.2699	11.7294	89.9526
	88.7193	35.535	NaN	NaN	NaN	NaN	NaN	NaN	NaN	252.008	56.6028	NaN	NaN	NaN	NaN	61.4088	NaN	NaN	NaN	NaN	NaN	NaN	NaN	41.9637	31.578	NaN	157.486	NaN	51.4278	35.0446	NaN	NaN	46.816	NaN	29.0372	NaN	NaN	NaN	NaN	53.7662	NaN	NaN	NaN	NaN	28.3229	13.0287	15.4894	10.4403	89.6325
	88.4922	39.054	NaN	NaN	NaN	NaN	NaN	NaN	NaN	254.407	57.4298	NaN	NaN	NaN	NaN	61.0987	NaN	NaN	NaN	NaN	NaN	NaN	NaN	41.5317	34.4552	NaN	158.606	NaN	50.6122	33.6535	NaN	NaN	46.1116	NaN	30.2645	NaN	NaN	NaN	NaN	53.6822	NaN	NaN	NaN	NaN	30.8146	13.3767	15.9345	11.6188	90.3263
	86.6114	40.7873	NaN	NaN	NaN	NaN	NaN	NaN	NaN	251.74	56.5934	NaN	NaN	NaN	NaN	58.0074	NaN	NaN	NaN	NaN	NaN	NaN	NaN	40.4664	34.9871	NaN	158.236	NaN	50.0607	34.4267	NaN	NaN	45.503	NaN	29.3505	NaN	NaN	NaN	NaN	52.5554	NaN	NaN	NaN	NaN	30.9616	13.022	14.5229	8.86491	90.2248
	85.8797	44.1319	NaN	NaN	NaN	NaN	NaN	NaN	NaN	252.18	58.1875	NaN	NaN	NaN	NaN	55.7679	NaN	NaN	NaN	NaN	NaN	NaN	NaN	40.1947	36.3916	NaN	159.05	NaN	49.4422	36.0402	NaN	NaN	46.8138	NaN	29.3439	NaN	NaN	NaN	NaN	52.7458	NaN	NaN	NaN	NaN	32.9973	12.8042	18.0167	10.4182	90.2284
	84.2399	46.4188	NaN	NaN	NaN	NaN	NaN	NaN	NaN	250.39	55.6722	NaN	NaN	NaN	NaN	54.7108	NaN	NaN	NaN	NaN	NaN	NaN	NaN	39.2392	34.973	NaN	157.71	NaN	51.8317	34.4844	NaN	NaN	45.9419	NaN	27.6117	NaN	NaN	NaN	NaN	51.6075	NaN	NaN	NaN	NaN	32.9356	12.4507	13.5463	7.0531	89.0156
	83.5777	37.2945	NaN	NaN	NaN	NaN	NaN	NaN	NaN	250.281	55.0518	NaN	NaN	NaN	NaN	53.4246	NaN	NaN	NaN	NaN	NaN	NaN	NaN	40.3966	36.9554	NaN	157.85	NaN	51.6939	35.5912	NaN	NaN	45.9965	NaN	27.0664	NaN	NaN	NaN	NaN	51.4647	NaN	NaN	NaN	NaN	33.6181	13.0976	15.2416	7.11207	89.7923
	82.6247	52.4235	NaN	NaN	NaN	NaN	NaN	NaN	NaN	248.688	52.6842	NaN	NaN	NaN	NaN	51.8275	NaN	NaN	NaN	NaN	NaN	NaN	NaN	39.7466	33.7466	NaN	158.467	NaN	52.0123	33.8966	NaN	NaN	44.9539	NaN	24.4059	NaN	NaN	NaN	NaN	49.4797	NaN	NaN	NaN	NaN	31.9622	11.5014	15.2287	5.50456	88.5644
	82.8368	42.4596	NaN	NaN	NaN	NaN	NaN	NaN	NaN	250.453	52.4377	NaN	NaN	NaN	NaN	52.4662	NaN	NaN	NaN	NaN	NaN	NaN	NaN	40.3284	35.0642	NaN	159.246	NaN	52.6651	34.1432	NaN	NaN	45.225	NaN	24.6343	NaN	NaN	NaN	NaN	50.8156	NaN	NaN	NaN	NaN	33.2603	11.9128	38.7602	6.05887	87.9633
	82.7465	60.616	NaN	NaN	NaN	NaN	NaN	NaN	NaN	246.42	51.384	NaN	NaN	NaN	NaN	50.1644	NaN	NaN	NaN	NaN	NaN	NaN	NaN	40.0959	32.4596	NaN	159.178	NaN	51.9987	33.9039	NaN	NaN	44.2624	NaN	23.931	NaN	NaN	NaN	NaN	50.3351	NaN	NaN	NaN	NaN	35.7038	8.38095	42.1426	5.75028	86.6245
	83.2981	41.8567	NaN	NaN	NaN	NaN	NaN	NaN	NaN	247.332	50.8713	NaN	NaN	NaN	NaN	50.2771	NaN	NaN	NaN	NaN	NaN	NaN	NaN	40.3302	32.1067	NaN	161.476	NaN	52.2747	34.5052	NaN	NaN	44.5404	NaN	23.3886	NaN	NaN	NaN	NaN	50.2119	NaN	NaN	NaN	NaN	35.0948	8.85273	44.2896	8.97197	85.6739
	82.6931	71.4478	NaN	NaN	NaN	NaN	NaN	NaN	NaN	245.702	50.5863	NaN	NaN	NaN	NaN	52.5545	NaN	NaN	NaN	NaN	NaN	NaN	NaN	39.5747	29.5186	NaN	160.957	NaN	51.8182	32.9571	NaN	NaN	44.4254	NaN	22.9653	NaN	NaN	NaN	NaN	47.7198	NaN	NaN	NaN	NaN	35.1415	6.07794	43.894	8.75166	84.6456
	83.3104	47.4416	NaN	NaN	NaN	NaN	NaN	NaN	NaN	245.29	51.6049	NaN	NaN	NaN	NaN	53.1961	NaN	NaN	NaN	NaN	NaN	NaN	NaN	38.9923	28.7568	NaN	162.021	NaN	51.9255	32.7124	NaN	NaN	45.4538	NaN	23.5673	NaN	NaN	NaN	NaN	47.3194	NaN	NaN	NaN	NaN	35.4669	4.94411	26.9945	11.4491	84.3615
	81.7289	51.5378	NaN	NaN	NaN	NaN	NaN	NaN	NaN	241.841	50.578	NaN	NaN	NaN	NaN	51.9761	NaN	NaN	NaN	NaN	NaN	NaN	NaN	37.7457	27.8026	NaN	161.138	NaN	51.6743	32.8127	NaN	NaN	46.4366	NaN	22.3664	NaN	NaN	NaN	NaN	46.8306	NaN	NaN	NaN	NaN	34.9556	2.46799	24.6434	12.0558	82.8216
	81.243	51.2363	NaN	NaN	NaN	NaN	NaN	NaN	NaN	242.452	51.45	NaN	NaN	NaN	NaN	53.8894	NaN	NaN	NaN	NaN	NaN	NaN	NaN	37.6182	28.6142	NaN	160.764	NaN	52.8983	33.8908	NaN	NaN	47.8693	NaN	22.7219	NaN	NaN	NaN	NaN	47.7245	NaN	NaN	NaN	NaN	34.8713	2.26296	27.3227	13.7498	83.7834
	80.8271	73.1886	NaN	NaN	NaN	NaN	NaN	NaN	NaN	238.488	50.5861	NaN	NaN	NaN	NaN	52.2951	NaN	NaN	NaN	NaN	NaN	NaN	NaN	37.0656	28.2879	NaN	157.675	NaN	52.481	33.198	NaN	NaN	48.1487	NaN	21.605	NaN	NaN	NaN	NaN	46.531	NaN	NaN	NaN	NaN	32.3159	-0.069416	26.9726	15.1616	79.0291
	80.6807	95.1408	NaN	NaN	NaN	NaN	NaN	NaN	NaN	240.967	51.4626	NaN	NaN	NaN	NaN	52.0092	NaN	NaN	NaN	NaN	NaN	NaN	NaN	37.1811	29.678	NaN	157.798	NaN	52.4738	34.0118	NaN	NaN	51.9636	NaN	22.5943	NaN	NaN	NaN	NaN	47.6824	NaN	NaN	NaN	NaN	33.4624	-0.11948	28.1124	16.0064	80.4223
	80.573	96.5388	NaN	NaN	NaN	NaN	NaN	NaN	NaN	241.911	52.1695	NaN	NaN	NaN	NaN	49.7157	NaN	NaN	NaN	NaN	NaN	NaN	NaN	38.1441	29.9447	NaN	155.936	NaN	51.4301	32.2643	NaN	NaN	51.6577	NaN	22.4655	NaN	NaN	NaN	NaN	47.4347	NaN	NaN	NaN	NaN	32.8871	0.445396	25.8189	16.9711	78.3012
	80.4516	96.0295	NaN	NaN	NaN	NaN	NaN	NaN	NaN	243.13	49.5965	NaN	NaN	NaN	NaN	50.3064	NaN	NaN	NaN	NaN	NaN	NaN	NaN	39.4503	29.6312	NaN	155.941	NaN	50.6433	32.0491	NaN	NaN	49.6645	NaN	21.8262	NaN	NaN	NaN	NaN	47.3341	NaN	NaN	NaN	NaN	34.0031	-0.499421	46.0855	17.6918	76.214
	79.2959	96.3136	NaN	NaN	NaN	NaN	NaN	NaN	NaN	240.709	51.5664	NaN	NaN	NaN	NaN	49.9729	NaN	NaN	NaN	NaN	NaN	NaN	NaN	38.832	29.6998	NaN	154.042	NaN	48.4953	30.5523	NaN	NaN	49.8958	NaN	20.8601	NaN	NaN	NaN	NaN	46.4325	NaN	NaN	NaN	NaN	31.5569	-0.978771	27.1477	17.6743	74.5219
	79.3379	98.4778	NaN	NaN	NaN	NaN	NaN	NaN	NaN	241.565	54.0461	NaN	NaN	NaN	NaN	51.618	NaN	NaN	NaN	NaN	NaN	NaN	NaN	39.7815	30.5634	NaN	153.557	NaN	48.4216	31.7175	NaN	NaN	50.8404	NaN	22.7128	NaN	NaN	NaN	NaN	45.5642	NaN	NaN	NaN	NaN	32.6198	-0.0226363	51.4928	20.0942	74.4254
	79.8468	97.1646	NaN	NaN	NaN	NaN	NaN	NaN	NaN	239.562	54.5788	NaN	NaN	NaN	NaN	48.9335	NaN	NaN	NaN	NaN	NaN	NaN	NaN	40.2021	30.7101	NaN	151.059	NaN	47.9472	31.2184	NaN	NaN	50.4777	NaN	21.6658	NaN	NaN	NaN	NaN	44.7978	NaN	NaN	NaN	NaN	31.4124	-0.0373989	52.1524	19.0302	73.6216
	80.6807	97.9801	NaN	NaN	NaN	NaN	NaN	NaN	NaN	239.205	57.8031	NaN	NaN	NaN	NaN	51.9594	NaN	NaN	NaN	NaN	NaN	NaN	NaN	40.7109	35.2583	NaN	150.797	NaN	47.8181	31.6061	NaN	NaN	51.4849	NaN	22.9944	NaN	NaN	NaN	NaN	44.6612	NaN	NaN	NaN	NaN	31.2593	0.900455	35.9522	19.3346	73.4191
	81.562	97.6691	NaN	NaN	NaN	NaN	NaN	NaN	NaN	237.092	55.3361	NaN	NaN	NaN	NaN	50.8525	NaN	NaN	NaN	NaN	NaN	NaN	NaN	41.9321	34.2383	NaN	145.954	NaN	45.5252	29.6918	NaN	NaN	50.4094	NaN	22.6754	NaN	NaN	NaN	NaN	42.7977	NaN	NaN	NaN	NaN	30.1713	2.12896	30.3143	17.108	70.895
	83.959	100.227	NaN	NaN	NaN	NaN	NaN	NaN	NaN	238.536	55.8543	NaN	NaN	NaN	NaN	51.3147	NaN	NaN	NaN	NaN	NaN	NaN	NaN	42.7035	36.8578	NaN	144.741	NaN	46.4735	30.4128	NaN	NaN	50.4777	NaN	23.4142	NaN	NaN	NaN	NaN	45.4596	NaN	NaN	NaN	NaN	30.1988	3.44653	30.3628	17.1638	71.5331
	84.0266	97.8212	NaN	NaN	NaN	NaN	NaN	NaN	NaN	238.038	54.5993	NaN	NaN	NaN	NaN	51.39	NaN	NaN	NaN	NaN	NaN	NaN	NaN	42.6786	37.2156	NaN	141.568	NaN	45.1262	28.8991	NaN	NaN	48.9538	NaN	24.611	NaN	NaN	NaN	NaN	42.8263	NaN	NaN	NaN	NaN	28.7797	5.72719	29.1548	15.3327	68.1157
	86.9112	92.614	NaN	NaN	NaN	NaN	NaN	NaN	NaN	238.494	54.616	NaN	NaN	NaN	NaN	51.1515	NaN	NaN	NaN	NaN	NaN	NaN	NaN	44.5663	32.9842	NaN	140.19	NaN	48.1557	29.0095	NaN	NaN	48.1907	NaN	27.8779	NaN	NaN	NaN	NaN	44.2533	NaN	NaN	NaN	NaN	29.5809	9.00289	29.026	14.6647	69.4353
	86.5697	88.789	NaN	NaN	NaN	NaN	NaN	NaN	NaN	237.487	52.9149	NaN	NaN	NaN	NaN	48.4837	NaN	NaN	NaN	NaN	NaN	NaN	NaN	45.0036	41.1915	NaN	138.004	NaN	47.712	26.5353	NaN	NaN	46.7376	NaN	27.9249	NaN	NaN	NaN	NaN	42.0456	NaN	NaN	NaN	NaN	26.593	11.2169	27.1855	13.5479	67.4282
	87.2997	87.9584	NaN	NaN	NaN	NaN	NaN	NaN	NaN	237.861	54.6059	NaN	NaN	NaN	NaN	48.8147	NaN	NaN	NaN	NaN	NaN	NaN	NaN	46.9092	41.61	NaN	137.794	NaN	48.3096	28.6684	NaN	NaN	45.6212	NaN	29.8426	NaN	NaN	NaN	NaN	41.5619	NaN	NaN	NaN	NaN	27.182	12.6362	26.3896	13.9447	67.0869
	86.4447	85.2071	NaN	NaN	NaN	NaN	NaN	NaN	NaN	235.775	53.0137	NaN	NaN	NaN	NaN	48.2988	NaN	NaN	NaN	NaN	NaN	NaN	NaN	46.8745	41.1598	NaN	136.266	NaN	46.4375	28.447	NaN	NaN	43.8917	NaN	28.7202	NaN	NaN	NaN	NaN	40.6515	NaN	NaN	NaN	NaN	25.6571	11.0297	27.1496	11.8059	66.1924
	86.0923	84.2615	NaN	NaN	NaN	NaN	NaN	NaN	NaN	236.582	54.7381	NaN	NaN	NaN	NaN	50.0571	NaN	NaN	NaN	NaN	NaN	NaN	NaN	46.4383	41.4867	NaN	135.819	NaN	47.615	31.0734	NaN	NaN	43.7105	NaN	30.0476	NaN	NaN	NaN	NaN	40.8023	NaN	NaN	NaN	NaN	26.1549	12.7096	27.7788	12.1551	66.9191
	85.3234	83.8096	NaN	NaN	NaN	NaN	NaN	NaN	NaN	235.542	54.0097	NaN	NaN	NaN	NaN	50.5903	NaN	NaN	NaN	NaN	NaN	NaN	NaN	45.9422	42.1525	NaN	134.718	NaN	45.9022	32.1301	NaN	NaN	43.4523	NaN	28.2517	NaN	NaN	NaN	NaN	39.4577	NaN	NaN	NaN	NaN	24.3041	10.0393	27.3954	12.024	65.956
	85.3167	85.3343	NaN	NaN	NaN	NaN	NaN	NaN	NaN	235.38	56.2989	NaN	NaN	NaN	NaN	50.3652	NaN	NaN	NaN	NaN	NaN	NaN	NaN	46.1685	44.4515	NaN	135.596	NaN	47.3231	37.0316	NaN	NaN	44.6536	NaN	26.8645	NaN	NaN	NaN	NaN	40.5331	NaN	NaN	NaN	NaN	23.2977	9.42592	28.308	11.8336	65.8255
	84.613	84.5913	NaN	NaN	NaN	NaN	NaN	NaN	NaN	231.232	52.5936	NaN	NaN	NaN	NaN	51.0744	NaN	NaN	NaN	NaN	NaN	NaN	NaN	42.5478	43.3179	NaN	131.533	NaN	47.4595	38.4779	NaN	NaN	44.5086	NaN	21.9576	NaN	NaN	NaN	NaN	39.5748	NaN	NaN	NaN	NaN	22.6698	6.15074	27.7924	10.3313	64.0485
	84.991	88.7736	NaN	NaN	NaN	NaN	NaN	NaN	NaN	230.543	53.8833	NaN	NaN	NaN	NaN	52.2725	NaN	NaN	NaN	NaN	NaN	NaN	NaN	42.8336	47.461	NaN	135.226	NaN	50.3128	29.7602	NaN	NaN	46.6519	NaN	19.5994	NaN	NaN	NaN	NaN	40.3739	NaN	NaN	NaN	NaN	22.5886	8.10029	28.7626	9.89118	64.7758
	85.5957	87.3388	NaN	NaN	NaN	NaN	NaN	NaN	NaN	236.062	52.3311	NaN	NaN	NaN	NaN	52.4486	NaN	NaN	NaN	NaN	NaN	NaN	NaN	40.933	47.1986	NaN	133.535	NaN	49.6798	45.4168	NaN	NaN	45.8347	NaN	17.1361	NaN	NaN	NaN	NaN	38.793	NaN	NaN	NaN	NaN	22.3075	5.50919	28.4819	9.34724	64.1378
	86.4189	88.5817	NaN	NaN	NaN	NaN	NaN	NaN	NaN	223.849	49.3501	NaN	NaN	NaN	NaN	54.5401	NaN	NaN	NaN	NaN	NaN	NaN	NaN	40.6211	48.3205	NaN	135.501	NaN	50.1321	34.5809	NaN	NaN	47.3282	NaN	17.2177	NaN	NaN	NaN	NaN	39.6231	NaN	NaN	NaN	NaN	23.9821	6.26887	28.9561	10.1621	63.2971
	86.3593	88.3566	NaN	NaN	NaN	NaN	NaN	NaN	NaN	233.306	50.2509	NaN	NaN	NaN	NaN	54.615	NaN	NaN	NaN	NaN	NaN	NaN	NaN	38.93	47.4037	NaN	134.581	NaN	50.5955	53.6975	NaN	NaN	47.1681	NaN	17.4232	NaN	NaN	NaN	NaN	36.6403	NaN	NaN	NaN	NaN	22.6091	4.96545	28.8921	9.4899	61.8973
	86.6379	89.7831	NaN	NaN	NaN	NaN	NaN	NaN	NaN	214.843	51.9278	NaN	NaN	NaN	NaN	55.4471	NaN	NaN	NaN	NaN	NaN	NaN	NaN	39.3902	47.7132	NaN	136.834	NaN	50.801	58.4607	NaN	NaN	47.5106	NaN	19.5061	NaN	NaN	NaN	NaN	36.5444	NaN	NaN	NaN	NaN	21.8948	5.51973	28.7442	11.0774	62.8113
	87.4789	89.0153	NaN	NaN	NaN	NaN	NaN	NaN	NaN	233.303	52.2378	NaN	NaN	NaN	NaN	56.2867	NaN	NaN	NaN	NaN	NaN	NaN	NaN	37.3599	47.01	NaN	136.613	NaN	49.3822	59.4965	NaN	NaN	47.256	NaN	19.4789	NaN	NaN	NaN	NaN	32.7904	NaN	NaN	NaN	NaN	20.5358	4.25464	28.9304	9.23867	60.5261
	87.8384	89.6405	NaN	NaN	NaN	NaN	NaN	NaN	NaN	207.727	54.0634	NaN	NaN	NaN	NaN	57.4492	NaN	NaN	NaN	NaN	NaN	NaN	NaN	36.9478	47.3368	NaN	137.466	NaN	51.2164	39.9989	NaN	NaN	48.5564	NaN	21.092	NaN	NaN	NaN	NaN	33.4717	NaN	NaN	NaN	NaN	20.401	4.45298	29.5365	10.2119	59.8637
	87.7812	88.4589	NaN	NaN	NaN	NaN	NaN	NaN	NaN	203.451	52.1841	NaN	NaN	NaN	NaN	55.9052	NaN	NaN	NaN	NaN	NaN	NaN	NaN	35.7628	45.9673	NaN	135.627	NaN	51.004	57.1775	NaN	NaN	47.7879	NaN	20.7007	NaN	NaN	NaN	NaN	31.6208	NaN	NaN	NaN	NaN	16.7011	2.39019	28.7127	9.71988	58.4876
	87.7786	89.3364	NaN	NaN	NaN	NaN	NaN	NaN	NaN	203.516	53.3614	NaN	NaN	NaN	NaN	57.0551	NaN	NaN	NaN	NaN	NaN	NaN	NaN	35.3228	46.358	NaN	136.571	NaN	54.5677	74.3561	NaN	NaN	48.9022	NaN	21.1814	NaN	NaN	NaN	NaN	32.994	NaN	NaN	NaN	NaN	15.5505	2.34252	29.2303	9.61546	58.4636
	85.3391	87.9033	NaN	NaN	NaN	NaN	NaN	NaN	NaN	200.495	52.5367	NaN	NaN	NaN	NaN	56.1841	NaN	NaN	NaN	NaN	NaN	NaN	NaN	33.4238	43.5505	NaN	132.401	NaN	55.124	77.1927	NaN	NaN	48.2937	NaN	20.887	NaN	NaN	NaN	NaN	32.6242	NaN	NaN	NaN	NaN	13.7201	0.99789	27.2014	8.1111	57.6689
	84.7103	87.6627	NaN	NaN	NaN	NaN	NaN	NaN	NaN	200.94	54.5637	NaN	NaN	NaN	NaN	56.3738	NaN	NaN	NaN	NaN	NaN	NaN	NaN	34.0427	46.7594	NaN	130.691	NaN	54.6995	81.2634	NaN	NaN	48.616	NaN	22.2765	NaN	NaN	NaN	NaN	33.7212	NaN	NaN	NaN	NaN	14.0367	1.38351	26.7938	8.40672	57.3511
	83.0478	83.7463	NaN	NaN	NaN	NaN	NaN	NaN	NaN	199.425	50.9818	NaN	NaN	NaN	NaN	56.8295	NaN	NaN	NaN	NaN	NaN	NaN	NaN	32.3208	46.6521	NaN	130.07	NaN	54.6292	81.1442	NaN	NaN	47.8878	NaN	22.1375	NaN	NaN	NaN	NaN	33.0403	NaN	NaN	NaN	NaN	14.065	1.59714	24.3338	5.92711	56.1832
	81.8163	83.2776	NaN	NaN	NaN	NaN	NaN	NaN	NaN	199.415	54.4092	NaN	NaN	NaN	NaN	57.5084	NaN	NaN	NaN	NaN	NaN	NaN	NaN	33.1995	43.1356	NaN	129.603	NaN	51.9255	81.3441	NaN	NaN	48.0027	NaN	23.4886	NaN	NaN	NaN	NaN	34.1849	NaN	NaN	NaN	NaN	15.3612	2.36174	24.4151	7.72929	56.1498
	81.4623	82.9501	NaN	NaN	NaN	NaN	NaN	NaN	NaN	198.228	56.7603	NaN	NaN	NaN	NaN	56.6196	NaN	NaN	NaN	NaN	NaN	NaN	NaN	31.7118	39.9977	NaN	130.487	NaN	53.3346	83.6902	NaN	NaN	48.0146	NaN	24.4818	NaN	NaN	NaN	NaN	33.8467	NaN	NaN	NaN	NaN	16.3689	1.25161	24.7056	9.1586	55.6998
	81.2717	79.7916	NaN	NaN	NaN	NaN	NaN	NaN	NaN	195.145	57.6999	NaN	NaN	NaN	NaN	52.4082	NaN	NaN	NaN	NaN	NaN	NaN	NaN	30.7828	37.512	NaN	133.927	NaN	51.608	81.1504	NaN	NaN	46.666	NaN	23.1555	NaN	NaN	NaN	NaN	33.1727	NaN	NaN	NaN	NaN	17.0424	1.30304	22.1547	10.8757	55.1649
	81.2347	76.2711	NaN	NaN	NaN	NaN	NaN	NaN	NaN	193.959	55.1499	NaN	NaN	NaN	NaN	49.2519	NaN	NaN	NaN	NaN	NaN	NaN	NaN	29.8564	33.3121	NaN	133.46	NaN	52.7245	80.1423	NaN	NaN	44.9206	NaN	18.7997	NaN	NaN	NaN	NaN	49.4962	NaN	NaN	NaN	NaN	17.4028	1.70832	21.2761	8.846	53.6603
	82.7034	75.7709	NaN	NaN	NaN	NaN	NaN	NaN	NaN	194.542	56.6799	NaN	NaN	NaN	NaN	57.1689	NaN	NaN	NaN	NaN	NaN	NaN	NaN	30.5732	38.2224	NaN	135.038	NaN	52.5291	81.8251	NaN	NaN	45.6593	NaN	18.26	NaN	NaN	NaN	NaN	49.629	NaN	NaN	NaN	NaN	17.8851	3.43623	20.9247	13.4451	53.7875
	82.148	73.6347	NaN	NaN	NaN	NaN	NaN	NaN	NaN	192.002	53.7562	NaN	NaN	NaN	NaN	57.064	NaN	NaN	NaN	NaN	NaN	NaN	NaN	30.812	37.1538	NaN	134.642	NaN	53.85	82.3265	NaN	NaN	44.0025	NaN	15.4041	NaN	NaN	NaN	NaN	51.9453	NaN	NaN	NaN	NaN	16.9597	4.19267	20.0171	8.44395	53.1093
	84.4871	74.5529	NaN	NaN	NaN	NaN	NaN	NaN	NaN	191.297	53.3678	NaN	NaN	NaN	NaN	48.6549	NaN	NaN	NaN	NaN	NaN	NaN	NaN	32.3431	39.1549	NaN	134.927	NaN	58.3195	84.2007	NaN	NaN	44.604	NaN	14.7719	NaN	NaN	NaN	NaN	33.5097	NaN	NaN	NaN	NaN	17.2956	6.12079	19.4704	8.61473	53.117
	84.9348	72.9221	NaN	NaN	NaN	NaN	NaN	NaN	NaN	189.331	51.5937	NaN	NaN	NaN	NaN	45.6589	NaN	NaN	NaN	NaN	NaN	NaN	NaN	33.3888	36.3691	NaN	134.278	NaN	56.5745	83.9234	NaN	NaN	41.45	NaN	13.7709	NaN	NaN	NaN	NaN	41.5033	NaN	NaN	NaN	NaN	16.3639	6.30039	19.5659	7.97718	52.3306
	86.7818	73.5645	NaN	NaN	NaN	NaN	NaN	NaN	NaN	189.93	51.9216	NaN	NaN	NaN	NaN	53.2104	NaN	NaN	NaN	NaN	NaN	NaN	NaN	34.2835	35.5767	NaN	135.441	NaN	60.4517	84.8906	NaN	NaN	41.0369	NaN	13.8193	NaN	NaN	NaN	NaN	46.4973	NaN	NaN	NaN	NaN	18.1972	6.93173	19.048	10.1483	52.8846
	84.8678	73.317	NaN	NaN	NaN	NaN	NaN	NaN	NaN	187.433	50.293	NaN	NaN	NaN	NaN	58.5108	NaN	NaN	NaN	NaN	NaN	NaN	NaN	34.0784	32.6817	NaN	134.828	NaN	61.963	83.0266	NaN	NaN	38.4093	NaN	14.0837	NaN	NaN	NaN	NaN	46.2629	NaN	NaN	NaN	NaN	17.3907	6.40559	17.4253	12.7452	52.4789
	84.6742	72.9005	NaN	NaN	NaN	NaN	NaN	NaN	NaN	188.334	50.0789	NaN	NaN	NaN	NaN	57.9224	NaN	NaN	NaN	NaN	NaN	NaN	NaN	35.4034	31.6316	NaN	135.122	NaN	64.1935	83.0943	NaN	NaN	36.9134	NaN	15.7911	NaN	NaN	NaN	NaN	51.2342	NaN	NaN	NaN	NaN	18.8572	8.28472	17.1566	16.189	53.5819
	82.498	72.5234	NaN	NaN	NaN	NaN	NaN	NaN	NaN	185.827	51.4879	NaN	NaN	NaN	NaN	54.3991	NaN	NaN	NaN	NaN	NaN	NaN	NaN	34.555	27.8517	NaN	133.011	NaN	66.4015	80.2365	NaN	NaN	32.8782	NaN	16.6071	NaN	NaN	NaN	NaN	49.4562	NaN	NaN	NaN	NaN	18.6705	6.08013	16.0136	17.4523	53.004
	82.4069	73.7775	NaN	NaN	NaN	NaN	NaN	NaN	NaN	185.214	51.485	NaN	NaN	NaN	NaN	54.6939	NaN	NaN	NaN	NaN	NaN	NaN	NaN	34.3928	35.9729	NaN	133.14	NaN	69.255	80.0793	NaN	NaN	33.4368	NaN	18.2135	NaN	NaN	NaN	NaN	53.1121	NaN	NaN	NaN	NaN	19.5406	5.90482	16.8549	22.2973	53.48
	80.9014	71.5281	NaN	NaN	NaN	NaN	NaN	NaN	NaN	184.628	52.2422	NaN	NaN	NaN	NaN	51.3432	NaN	NaN	NaN	NaN	NaN	NaN	NaN	33.4069	32.2611	NaN	131.384	NaN	70.2746	79.3462	NaN	NaN	30.8225	NaN	17.0621	NaN	NaN	NaN	NaN	54.3361	NaN	NaN	NaN	NaN	18.4432	5.69338	18.2367	23.2363	52.2137
	81.2867	72.9621	NaN	NaN	NaN	NaN	NaN	NaN	NaN	184.865	54.8595	NaN	NaN	NaN	NaN	51.9035	NaN	NaN	NaN	NaN	NaN	NaN	NaN	34.1565	37.1397	NaN	130.536	NaN	63.0782	79.6567	NaN	NaN	31.9544	NaN	17.7757	NaN	NaN	NaN	NaN	48.7485	NaN	NaN	NaN	NaN	17.8412	4.94863	36.9769	28.1003	51.7213
	81.1434	71.9701	NaN	NaN	NaN	NaN	NaN	NaN	NaN	184.359	54.4165	NaN	NaN	NaN	NaN	47.7633	NaN	NaN	NaN	NaN	NaN	NaN	NaN	32.6778	35.1946	NaN	129.911	NaN	56.6471	79.0448	NaN	NaN	31.3456	NaN	16.78	NaN	NaN	NaN	NaN	59.9188	NaN	NaN	NaN	NaN	14.6712	3.79462	36.3648	28.7261	51.2649
	82.7112	72.6893	NaN	NaN	NaN	NaN	NaN	NaN	NaN	185.793	54.7949	NaN	NaN	NaN	NaN	46.1291	NaN	NaN	NaN	NaN	NaN	NaN	NaN	33.4645	38.3427	NaN	130.043	NaN	61.2283	80.3822	NaN	NaN	32.7492	NaN	17.1224	NaN	NaN	NaN	NaN	51.2841	NaN	NaN	NaN	NaN	15.8524	5.06443	36.4071	33.5144	50.9113
	82.417	70.5806	NaN	NaN	NaN	NaN	NaN	NaN	NaN	185.708	54.5524	NaN	NaN	NaN	NaN	41.8779	NaN	NaN	NaN	NaN	NaN	NaN	NaN	33.4406	34.8126	NaN	128.469	NaN	64.0393	79.3709	NaN	NaN	31.4063	NaN	16.8546	NaN	NaN	NaN	NaN	64.6347	NaN	NaN	NaN	NaN	16.1866	3.42299	33.7233	33.4608	50.3691
	83.6339	70.6802	NaN	NaN	NaN	NaN	NaN	NaN	NaN	186.587	54.7978	NaN	NaN	NaN	NaN	41.5404	NaN	NaN	NaN	NaN	NaN	NaN	NaN	35.3534	34.1411	NaN	130.068	NaN	67.0554	80.782	NaN	NaN	31.6373	NaN	16.7563	NaN	NaN	NaN	NaN	68.0167	NaN	NaN	NaN	NaN	18.1414	3.78917	32.2386	38.2878	51.741
	83.7055	68.7117	NaN	NaN	NaN	NaN	NaN	NaN	NaN	187.013	51.6878	NaN	NaN	NaN	NaN	38.2323	NaN	NaN	NaN	NaN	NaN	NaN	NaN	34.229	29.7418	NaN	129.034	NaN	68.9853	80.7417	NaN	NaN	30.8416	NaN	15.6566	NaN	NaN	NaN	NaN	68.0777	NaN	NaN	NaN	NaN	17.7517	3.21985	31.8876	38.9169	50.9593
	84.2694	70.529	NaN	NaN	NaN	NaN	NaN	NaN	NaN	188.633	52.5876	NaN	NaN	NaN	NaN	37.7747	NaN	NaN	NaN	NaN	NaN	NaN	NaN	33.481	31.2032	NaN	129.472	NaN	71.21	82.8549	NaN	NaN	31.1307	NaN	16.366	NaN	NaN	NaN	NaN	70.2428	NaN	NaN	NaN	NaN	20.5936	3.01506	31.3342	40.6457	51.1951
	84.9421	67.3996	NaN	NaN	NaN	NaN	NaN	NaN	NaN	188.878	51.0809	NaN	NaN	NaN	NaN	37.3195	NaN	NaN	NaN	NaN	NaN	NaN	NaN	32.8742	28.1617	NaN	127.855	NaN	69.8147	81.5667	NaN	NaN	33.6617	NaN	15.8858	NaN	NaN	NaN	NaN	71.8421	NaN	NaN	NaN	NaN	18.8034	3.49071	30.6854	41.5875	50.9869
	86.9701	70.3784	NaN	NaN	NaN	NaN	NaN	NaN	NaN	189.536	52.1617	NaN	NaN	NaN	NaN	37.2689	NaN	NaN	NaN	NaN	NaN	NaN	NaN	32.8851	31.6397	NaN	128.248	NaN	71.748	84.3211	NaN	NaN	34.847	NaN	15.3754	NaN	NaN	NaN	NaN	74.3844	NaN	NaN	NaN	NaN	19.9468	3.88895	32.9809	41.7899	51.011
	87.7701	68.4216	NaN	NaN	NaN	NaN	NaN	NaN	NaN	190.487	50.8086	NaN	NaN	NaN	NaN	36.0791	NaN	NaN	NaN	NaN	NaN	NaN	NaN	31.0694	29.4575	NaN	125.909	NaN	69.0231	84.6183	NaN	NaN	35.9096	NaN	15.438	NaN	NaN	NaN	NaN	75.7169	NaN	NaN	NaN	NaN	18.9304	4.17843	32.0631	41.7787	50.4763
	90.8897	68.472	NaN	NaN	NaN	NaN	NaN	NaN	NaN	192.245	51.5072	NaN	NaN	NaN	NaN	36.086	NaN	NaN	NaN	NaN	NaN	NaN	NaN	30.5201	33.7141	NaN	124.804	NaN	71.1608	86.062	NaN	NaN	39.0847	NaN	15.821	NaN	NaN	NaN	NaN	77.619	NaN	NaN	NaN	NaN	19.4414	4.69235	31.6109	41.7275	49.9309
	91.1976	66.7039	NaN	NaN	NaN	NaN	NaN	NaN	NaN	193.035	49.475	NaN	NaN	NaN	NaN	35.1675	NaN	NaN	NaN	NaN	NaN	NaN	NaN	27.6507	29.6824	NaN	123.799	NaN	67.5485	85.1548	NaN	NaN	39.2056	NaN	15.3668	NaN	NaN	NaN	NaN	75.6091	NaN	NaN	NaN	NaN	18.3042	4.21603	31.0098	39.689	49.0164
	94.0136	67.8154	NaN	NaN	NaN	NaN	NaN	NaN	NaN	194.885	49.637	NaN	NaN	NaN	NaN	35.5625	NaN	NaN	NaN	NaN	NaN	NaN	NaN	27.6503	30.4036	NaN	123.296	NaN	71.5042	86.725	NaN	NaN	42.2832	NaN	15.6242	NaN	NaN	NaN	NaN	74.5173	NaN	NaN	NaN	NaN	19.4622	5.06623	29.3648	39.673	49.1938
	94.7857	66.3287	NaN	NaN	NaN	NaN	NaN	NaN	NaN	194.346	49.2325	NaN	NaN	NaN	NaN	35.2207	NaN	NaN	NaN	NaN	NaN	NaN	NaN	26.7451	27.4146	NaN	121.38	NaN	70.3855	85.4702	NaN	NaN	42.2348	NaN	15.0883	NaN	NaN	NaN	NaN	72.5443	NaN	NaN	NaN	NaN	16.6037	4.36837	26.6824	35.1692	48.1633
	96.8751	66.0379	NaN	NaN	NaN	NaN	NaN	NaN	NaN	195.428	49.7659	NaN	NaN	NaN	NaN	35.6359	NaN	NaN	NaN	NaN	NaN	NaN	NaN	27.6465	28.7585	NaN	120.874	NaN	65.7964	85.4708	NaN	NaN	44.7907	NaN	14.5429	NaN	NaN	NaN	NaN	71.5365	NaN	NaN	NaN	NaN	17.3179	4.09641	27.5532	35.7399	49.1298
	97.3815	64.8387	NaN	NaN	NaN	NaN	NaN	NaN	NaN	194.091	49.8843	NaN	NaN	NaN	NaN	33.3347	NaN	NaN	NaN	NaN	NaN	NaN	NaN	26.6422	27.803	NaN	119.566	NaN	64.1551	84.9127	NaN	NaN	43.7894	NaN	14.787	NaN	NaN	NaN	NaN	69.2898	NaN	NaN	NaN	NaN	17.5083	2.73118	27.8178	32.2974	47.7134
	98.8104	64.7043	NaN	NaN	NaN	NaN	NaN	NaN	NaN	194.617	51.6993	NaN	NaN	NaN	NaN	34.5772	NaN	NaN	NaN	NaN	NaN	NaN	NaN	26.6637	28.4051	NaN	119.985	NaN	63.6457	85.0252	NaN	NaN	45.396	NaN	14.9188	NaN	NaN	NaN	NaN	68.6429	NaN	NaN	NaN	NaN	19.5038	2.98827	28.8123	33.21	48.0652
	100.654	67.0721	NaN	NaN	NaN	NaN	NaN	NaN	NaN	193.728	51.0556	NaN	NaN	NaN	NaN	34.3841	NaN	NaN	NaN	NaN	NaN	NaN	NaN	26.2837	31.4651	NaN	119.178	NaN	62.2161	85.1449	NaN	NaN	45.7401	NaN	15.3068	NaN	NaN	NaN	NaN	67.581	NaN	NaN	NaN	NaN	20.4281	2.67869	27.6591	31.4665	46.9363
	103.177	65.691	NaN	NaN	NaN	NaN	NaN	NaN	NaN	194.168	52.6925	NaN	NaN	NaN	NaN	36.3612	NaN	NaN	NaN	NaN	NaN	NaN	NaN	24.6167	33.9058	NaN	117.686	NaN	62.0706	87.5298	NaN	NaN	45.0285	NaN	15.8018	NaN	NaN	NaN	NaN	67.8151	NaN	NaN	NaN	NaN	18.7929	2.22483	29.3053	27.9428	44.3033
	102.655	62.4762	NaN	NaN	NaN	NaN	NaN	NaN	NaN	192.766	51.9147	NaN	NaN	NaN	NaN	37.1413	NaN	NaN	NaN	NaN	NaN	NaN	NaN	24.7196	33.4677	NaN	115.756	NaN	59.4971	86.801	NaN	NaN	41.832	NaN	14.4488	NaN	NaN	NaN	NaN	66.9876	NaN	NaN	NaN	NaN	18.2679	1.52956	26.165	28.3277	44.4901
	106.107	64.0148	NaN	NaN	NaN	NaN	NaN	NaN	NaN	195.961	52.3827	NaN	NaN	NaN	NaN	39.5061	NaN	NaN	NaN	NaN	NaN	NaN	NaN	27.0712	28.104	NaN	114.514	NaN	62.9619	89.6835	NaN	NaN	41.8136	NaN	13.8605	NaN	NaN	NaN	NaN	69.363	NaN	NaN	NaN	NaN	21.2708	3.08471	26.4311	28.302	44.5308
	105.717	62.5556	NaN	NaN	NaN	NaN	NaN	NaN	NaN	197.028	51.6764	NaN	NaN	NaN	NaN	35.9871	NaN	NaN	NaN	NaN	NaN	NaN	NaN	27.9487	34.8918	NaN	112.544	NaN	62.9309	88.8306	NaN	NaN	39.8737	NaN	12.4197	NaN	NaN	NaN	NaN	68.9271	NaN	NaN	NaN	NaN	20.5016	3.87324	26.5734	28.7366	44.6155
	108.364	62.9087	NaN	NaN	NaN	NaN	NaN	NaN	NaN	199.631	51.5257	NaN	NaN	NaN	NaN	37.9503	NaN	NaN	NaN	NaN	NaN	NaN	NaN	30.066	35.2638	NaN	111.886	NaN	57.884	91.0373	NaN	NaN	40.2283	NaN	12.791	NaN	NaN	NaN	NaN	70.205	NaN	NaN	NaN	NaN	23.9209	5.89728	28.4822	29.4569	47.0177
	109.179	60.4647	NaN	NaN	NaN	NaN	NaN	NaN	NaN	197.392	50.659	NaN	NaN	NaN	NaN	38.8286	NaN	NaN	NaN	NaN	NaN	NaN	NaN	29.2022	32.5103	NaN	109.359	NaN	60.7839	91.5001	NaN	NaN	38.9937	NaN	13.4231	NaN	NaN	NaN	NaN	69.8576	NaN	NaN	NaN	NaN	25.9388	4.87814	27.7352	28.3656	46.4463
	110.383	60.2437	NaN	NaN	NaN	NaN	NaN	NaN	NaN	198.932	51.9823	NaN	NaN	NaN	NaN	39.5315	NaN	NaN	NaN	NaN	NaN	NaN	NaN	30.246	35.4768	NaN	108.753	NaN	54.5607	91.9209	NaN	NaN	39.4806	NaN	14.5333	NaN	NaN	NaN	NaN	71.0817	NaN	NaN	NaN	NaN	28.009	6.8634	29.3701	28.8017	46.9936
	110.915	58.1548	NaN	NaN	NaN	NaN	NaN	NaN	NaN	196.98	51.3964	NaN	NaN	NaN	NaN	40.4871	NaN	NaN	NaN	NaN	NaN	NaN	NaN	28.8132	35.2212	NaN	109.292	NaN	50.5993	91.6702	NaN	NaN	38.4753	NaN	14.041	NaN	NaN	NaN	NaN	70.9206	NaN	NaN	NaN	NaN	27.7932	5.82749	32.5049	27.7191	47.2442
	111.404	58.2897	NaN	NaN	NaN	NaN	NaN	NaN	NaN	201.5	53.3131	NaN	NaN	NaN	NaN	43.2241	NaN	NaN	NaN	NaN	NaN	NaN	NaN	28.6013	37.4978	NaN	109.967	NaN	49.5494	91.4663	NaN	NaN	39.375	NaN	15.4147	NaN	NaN	NaN	NaN	71.2787	NaN	NaN	NaN	NaN	28.2915	6.56026	27.5278	27.8204	47.2507
	111.649	56.2163	NaN	NaN	NaN	NaN	NaN	NaN	NaN	203.251	52.2354	NaN	NaN	NaN	NaN	42.3901	NaN	NaN	NaN	NaN	NaN	NaN	NaN	27.8609	35.7271	NaN	108.79	NaN	47.323	91.1214	NaN	NaN	37.8312	NaN	14.6143	NaN	NaN	NaN	NaN	70.7177	NaN	NaN	NaN	NaN	26.3136	7.61841	28.1087	26.7334	46.8002
	112.828	61.1199	NaN	NaN	NaN	NaN	NaN	NaN	NaN	204.518	53.6758	NaN	NaN	NaN	NaN	43.8334	NaN	NaN	NaN	NaN	NaN	NaN	NaN	29.1339	36.4591	NaN	109.187	NaN	49.3047	92.4034	NaN	NaN	39.2243	NaN	15.5748	NaN	NaN	NaN	NaN	71.3044	NaN	NaN	NaN	NaN	26.4626	7.91701	28.5526	26.4368	48.4491
	112.177	59.1992	NaN	NaN	NaN	NaN	NaN	NaN	NaN	204.131	52.0887	NaN	NaN	NaN	NaN	43.3173	NaN	NaN	NaN	NaN	NaN	NaN	NaN	28.638	33.1126	NaN	108.588	NaN	48.6303	91.3107	NaN	NaN	38.5583	NaN	16.5319	NaN	NaN	NaN	NaN	72.1391	NaN	NaN	NaN	NaN	23.4616	7.23595	16.1686	26.2178	47.1663
	113.448	55.6109	NaN	NaN	NaN	NaN	NaN	NaN	NaN	206.404	51.8343	NaN	NaN	NaN	NaN	44.2861	NaN	NaN	NaN	NaN	NaN	NaN	NaN	28.242	35.3233	NaN	108.7	NaN	49.37	92.9001	NaN	NaN	39.4725	NaN	16.727	NaN	NaN	NaN	NaN	72.118	NaN	NaN	NaN	NaN	23.7287	6.8798	18.8721	27.1785	47.69
	112.122	54.9557	NaN	NaN	NaN	NaN	NaN	NaN	NaN	205.305	48.1529	NaN	NaN	NaN	NaN	43.5982	NaN	NaN	NaN	NaN	NaN	NaN	NaN	28.1672	31.1513	NaN	108.559	NaN	45.4035	91.8941	NaN	NaN	39.3541	NaN	17.048	NaN	NaN	NaN	NaN	69.0331	NaN	NaN	NaN	NaN	21.5901	4.95217	18.8519	27.1181	48.7026
	111.488	54.8323	NaN	NaN	NaN	NaN	NaN	NaN	NaN	209.089	48.5774	NaN	NaN	NaN	NaN	44.3333	NaN	NaN	NaN	NaN	NaN	NaN	NaN	28.3435	31.1192	NaN	108.892	NaN	45.1354	92.0626	NaN	NaN	38.9196	NaN	18.7043	NaN	NaN	NaN	NaN	70.6239	NaN	NaN	NaN	NaN	23.6861	6.11027	20.8723	27.5108	52.7759
	110.872	54.2966	NaN	NaN	NaN	NaN	NaN	NaN	NaN	207.965	45.212	NaN	NaN	NaN	NaN	43.8194	NaN	NaN	NaN	NaN	NaN	NaN	NaN	27.0789	27.4193	NaN	109.773	NaN	48.9675	88.6269	NaN	NaN	37.1282	NaN	18.2488	NaN	NaN	NaN	NaN	71.7217	NaN	NaN	NaN	NaN	21.9609	3.51768	20.1989	28.4175	50.4132
	111.235	54.9107	NaN	NaN	NaN	NaN	NaN	NaN	NaN	209.854	45.1348	NaN	NaN	NaN	NaN	48.6508	NaN	NaN	NaN	NaN	NaN	NaN	NaN	26.79	29.5444	NaN	112.559	NaN	65.3146	90.1809	NaN	NaN	36.8859	NaN	19.447	NaN	NaN	NaN	NaN	63.9782	NaN	NaN	NaN	NaN	23.7188	2.82368	20.7028	31.0587	51.9816
	111.304	56.1338	NaN	NaN	NaN	NaN	NaN	NaN	NaN	206.04	43.0768	NaN	NaN	NaN	NaN	47.5792	NaN	NaN	NaN	NaN	NaN	NaN	NaN	25.206	26.1541	NaN	112.246	NaN	65.5517	87.6934	NaN	NaN	36.194	NaN	18.4228	NaN	NaN	NaN	NaN	60.3103	NaN	NaN	NaN	NaN	22.2163	1.96775	18.0163	29.7588	53.6299
	112.225	57.2232	NaN	NaN	NaN	NaN	NaN	NaN	NaN	210.063	44.5635	NaN	NaN	NaN	NaN	48.9706	NaN	NaN	NaN	NaN	NaN	NaN	NaN	24.7057	27.8449	NaN	113.515	NaN	67.1151	89.0302	NaN	NaN	36.489	NaN	19.8797	NaN	NaN	NaN	NaN	61.5059	NaN	NaN	NaN	NaN	22.5241	1.14135	18.07	29.9859	55.4442
	113.48	57.2311	NaN	NaN	NaN	NaN	NaN	NaN	NaN	210.077	43.7343	NaN	NaN	NaN	NaN	48.3182	NaN	NaN	NaN	NaN	NaN	NaN	NaN	22.2759	25.701	NaN	110.644	NaN	65.9379	87.5368	NaN	NaN	35.7771	NaN	17.5651	NaN	NaN	NaN	NaN	58.8366	NaN	NaN	NaN	NaN	22.0126	-0.829958	20.5356	29.6307	55.3315
	113.658	60.0196	NaN	NaN	NaN	NaN	NaN	NaN	NaN	212.847	43.2182	NaN	NaN	NaN	NaN	48.2704	NaN	NaN	NaN	NaN	NaN	NaN	NaN	22.6531	27.9639	NaN	109.936	NaN	67.9874	88.7258	NaN	NaN	36.0969	NaN	20.1313	NaN	NaN	NaN	NaN	61.0099	NaN	NaN	NaN	NaN	22.1081	-0.445078	20.4509	29.6271	59.2071
	113.164	60.1938	NaN	NaN	NaN	NaN	NaN	NaN	NaN	212.87	42.0987	NaN	NaN	NaN	NaN	46.4992	NaN	NaN	NaN	NaN	NaN	NaN	NaN	22.5628	26.4084	NaN	106.785	NaN	67.131	88.9371	NaN	NaN	36.1104	NaN	19.8708	NaN	NaN	NaN	NaN	58.3263	NaN	NaN	NaN	NaN	22.0022	-3.09845	19.3596	28.5343	59.0652
	113.034	60.4645	NaN	NaN	NaN	NaN	NaN	NaN	NaN	213.371	41.8114	NaN	NaN	NaN	NaN	44.6347	NaN	NaN	NaN	NaN	NaN	NaN	NaN	22.9802	26.9995	NaN	106.833	NaN	67.1988	83.2366	NaN	NaN	36.7951	NaN	20.7074	NaN	NaN	NaN	NaN	58.7393	NaN	NaN	NaN	NaN	22.8927	-2.57239	30.971	28.5899	63.7377
	112.251	60.3722	NaN	NaN	NaN	NaN	NaN	NaN	NaN	210.261	41.371	NaN	NaN	NaN	NaN	41.5148	NaN	NaN	NaN	NaN	NaN	NaN	NaN	22.9226	28.8258	NaN	105.989	NaN	67.7524	88.2835	NaN	NaN	36.6098	NaN	21.0315	NaN	NaN	NaN	NaN	57.7434	NaN	NaN	NaN	NaN	23.6386	-2.69917	29.3383	26.9784	60.8931
	111.717	60.8628	NaN	NaN	NaN	NaN	NaN	NaN	NaN	213.963	39.4945	NaN	NaN	NaN	NaN	41.9119	NaN	NaN	NaN	NaN	NaN	NaN	NaN	23.7354	28.7393	NaN	107.076	NaN	67.8217	65.5643	NaN	NaN	36.5796	NaN	23.3403	NaN	NaN	NaN	NaN	57.601	NaN	NaN	NaN	NaN	25.2266	-1.69474	29.0715	29.2791	60.9339
	110.507	57.5631	NaN	NaN	NaN	NaN	NaN	NaN	NaN	212.642	38.6764	NaN	NaN	NaN	NaN	39.0226	NaN	NaN	NaN	NaN	NaN	NaN	NaN	23.1348	29.3313	NaN	107.083	NaN	67.3363	88.8315	NaN	NaN	36.385	NaN	24.5849	NaN	NaN	NaN	NaN	55.2879	NaN	NaN	NaN	NaN	26.3942	-2.0869	27.4529	27.1684	58.1516
	108.483	57.3423	NaN	NaN	NaN	NaN	NaN	NaN	NaN	212.935	39.0246	NaN	NaN	NaN	NaN	40.2644	NaN	NaN	NaN	NaN	NaN	NaN	NaN	23.7606	29.8211	NaN	108.157	NaN	67.68	81.9854	NaN	NaN	36.561	NaN	27.88	NaN	NaN	NaN	NaN	56.0553	NaN	NaN	NaN	NaN	28.8748	-1.02909	25.1653	27.5919	57.9019
	104.725	53.665	NaN	NaN	NaN	NaN	NaN	NaN	NaN	211.183	38.8189	NaN	NaN	NaN	NaN	39.493	NaN	NaN	NaN	NaN	NaN	NaN	NaN	22.8311	29.1858	NaN	108.728	NaN	67.7004	75.1394	NaN	NaN	37.5482	NaN	27.8276	NaN	NaN	NaN	NaN	54.206	NaN	NaN	NaN	NaN	27.8851	-0.651052	30.1546	26.5355	54.7615
	104.151	58.1642	NaN	NaN	NaN	NaN	NaN	NaN	NaN	211.032	38.8513	NaN	NaN	NaN	NaN	40.3556	NaN	NaN	NaN	NaN	NaN	NaN	NaN	24.4939	33.1171	NaN	110.382	NaN	67.9509	68.2934	NaN	NaN	37.2614	NaN	29.9435	NaN	NaN	NaN	NaN	55.3296	NaN	NaN	NaN	NaN	28.6535	0.21162	25.3521	26.6721	54.4156
[truncated: 41 more columns]

## Sheet: PupilTrace-Tone-First3Trials
Included Pupil Traces, Tone-Noise, First 3 Trials
	0.625582	14.7346	NaN	NaN	NaN	NaN	NaN	NaN	NaN	-0.452216	3.94436	NaN	NaN	NaN	NaN	-4.35613	NaN	NaN	NaN	NaN	NaN	NaN	NaN	20.3616	-4.77329	NaN	-3.32711
	-1.85564	12.0125	NaN	NaN	NaN	NaN	NaN	NaN	NaN	-2.74004	2.56366	NaN	NaN	NaN	NaN	-2.62971	NaN	NaN	NaN	NaN	NaN	NaN	NaN	21.2303	-5.9466	NaN	0.494623
	-2.02106	8.19803	NaN	NaN	NaN	NaN	NaN	NaN	NaN	-5.90819	29.8702	NaN	NaN	NaN	NaN	-3.96127	NaN	NaN	NaN	NaN	NaN	NaN	NaN	19.4552	-8.36869	NaN	0.011708
	-0.760194	9.41361	NaN	NaN	NaN	NaN	NaN	NaN	NaN	-4.09117	31.9024	NaN	NaN	NaN	NaN	-0.0109036	NaN	NaN	NaN	NaN	NaN	NaN	NaN	20.445	4.08513	NaN	4.13319
	-0.973508	7.58073	NaN	NaN	NaN	NaN	NaN	NaN	NaN	-5.37071	32.7133	NaN	NaN	NaN	NaN	-1.31133	NaN	NaN	NaN	NaN	NaN	NaN	NaN	18.4943	14.8209	NaN	5.62215
	0.681971	9.17011	NaN	NaN	NaN	NaN	NaN	NaN	NaN	-3.90381	3.25401	NaN	NaN	NaN	NaN	0.517794	NaN	NaN	NaN	NaN	NaN	NaN	NaN	18.5245	-5.35995	NaN	8.5822
	1.55828	9.78496	NaN	NaN	NaN	NaN	NaN	NaN	NaN	-4.55271	8.22784	NaN	NaN	NaN	NaN	-0.869717	NaN	NaN	NaN	NaN	NaN	NaN	NaN	17.4549	-7.15765	NaN	8.11293
	3.80274	9.08676	NaN	NaN	NaN	NaN	NaN	NaN	NaN	-3.12189	10.0211	NaN	NaN	NaN	NaN	0.935817	NaN	NaN	NaN	NaN	NaN	NaN	NaN	17.1402	-2.14178	NaN	8.5825
	5.65225	9.53114	NaN	NaN	NaN	NaN	NaN	NaN	NaN	-3.56968	11.202	NaN	NaN	NaN	NaN	0.29414	NaN	NaN	NaN	NaN	NaN	NaN	NaN	15.7671	-3.763	NaN	6.45262
	9.06344	8.80346	NaN	NaN	NaN	NaN	NaN	NaN	NaN	-3.50892	12.0014	NaN	NaN	NaN	NaN	1.21276	NaN	NaN	NaN	NaN	NaN	NaN	NaN	15.4476	-3.48253	NaN	6.47937
	9.57012	8.60108	NaN	NaN	NaN	NaN	NaN	NaN	NaN	-3.32494	5.74093	NaN	NaN	NaN	NaN	2.92899	NaN	NaN	NaN	NaN	NaN	NaN	NaN	14.3572	-6.2588	NaN	3.17586
	10.8602	8.98555	NaN	NaN	NaN	NaN	NaN	NaN	NaN	-2.31076	22.0022	NaN	NaN	NaN	NaN	3.96521	NaN	NaN	NaN	NaN	NaN	NaN	NaN	15.5141	-4.64971	NaN	4.58189
	10.7228	9.70425	NaN	NaN	NaN	NaN	NaN	NaN	NaN	-1.85324	38.2635	NaN	NaN	NaN	NaN	4.42737	NaN	NaN	NaN	NaN	NaN	NaN	NaN	15.1073	-6.57096	NaN	1.41823
	12.1933	11.5082	NaN	NaN	NaN	NaN	NaN	NaN	NaN	-0.0285604	11.6017	NaN	NaN	NaN	NaN	6.65272	NaN	NaN	NaN	NaN	NaN	NaN	NaN	16.5286	-5.32303	NaN	2.68313
	12.0268	11.882	NaN	NaN	NaN	NaN	NaN	NaN	NaN	0.31928	9.69449	NaN	NaN	NaN	NaN	6.45485	NaN	NaN	NaN	NaN	NaN	NaN	NaN	15.7844	-6.02419	NaN	0.894835
	12.4224	11.934	NaN	NaN	NaN	NaN	NaN	NaN	NaN	2.0452	10.1767	NaN	NaN	NaN	NaN	3.4471	NaN	NaN	NaN	NaN	NaN	NaN	NaN	16.5436	-3.92098	NaN	0.892318
	12.0823	11.7619	NaN	NaN	NaN	NaN	NaN	NaN	NaN	2.58956	8.6439	NaN	NaN	NaN	NaN	4.19629	NaN	NaN	NaN	NaN	NaN	NaN	NaN	16.4043	-6.30831	NaN	0.201789
	13.2482	13.3236	NaN	NaN	NaN	NaN	NaN	NaN	NaN	3.5791	9.6156	NaN	NaN	NaN	NaN	6.21886	NaN	NaN	NaN	NaN	NaN	NaN	NaN	17.7544	-1.55548	NaN	-0.344327
	12.1626	14.1691	NaN	NaN	NaN	NaN	NaN	NaN	NaN	4.06182	7.67485	NaN	NaN	NaN	NaN	2.94133	NaN	NaN	NaN	NaN	NaN	NaN	NaN	17.5809	-2.59826	NaN	-1.7516
	13.0736	13.1171	NaN	NaN	NaN	NaN	NaN	NaN	NaN	5.20749	7.64998	NaN	NaN	NaN	NaN	3.12729	NaN	NaN	NaN	NaN	NaN	NaN	NaN	18.2848	-1.39312	NaN	-0.48956
	12.1756	12.5445	NaN	NaN	NaN	NaN	NaN	NaN	NaN	5.55096	5.92983	NaN	NaN	NaN	NaN	1.4517	NaN	NaN	NaN	NaN	NaN	NaN	NaN	18.2786	-2.54837	NaN	-0.67489
	11.1882	12.7373	NaN	NaN	NaN	NaN	NaN	NaN	NaN	5.70276	6.47927	NaN	NaN	NaN	NaN	3.50594	NaN	NaN	NaN	NaN	NaN	NaN	NaN	20.4554	1.42164	NaN	0.612324
	10.3085	11.3519	NaN	NaN	NaN	NaN	NaN	NaN	NaN	4.9636	5.54453	NaN	NaN	NaN	NaN	0.791461	NaN	NaN	NaN	NaN	NaN	NaN	NaN	19.4215	-2.07687	NaN	0.450018
	10.3574	11.3204	NaN	NaN	NaN	NaN	NaN	NaN	NaN	5.73947	6.62185	NaN	NaN	NaN	NaN	1.34464	NaN	NaN	NaN	NaN	NaN	NaN	NaN	19.3622	-1.99569	NaN	-0.79025
	8.30326	8.35038	NaN	NaN	NaN	NaN	NaN	NaN	NaN	5.78394	5.41144	NaN	NaN	NaN	NaN	0.594173	NaN	NaN	NaN	NaN	NaN	NaN	NaN	20.0493	7.77638	NaN	-2.21364
	8.66248	11.3869	NaN	NaN	NaN	NaN	NaN	NaN	NaN	6.26877	6.8543	NaN	NaN	NaN	NaN	0.714678	NaN	NaN	NaN	NaN	NaN	NaN	NaN	21.3065	11.6527	NaN	-2.35514
	7.69671	8.006	NaN	NaN	NaN	NaN	NaN	NaN	NaN	5.55853	6.09559	NaN	NaN	NaN	NaN	-0.148869	NaN	NaN	NaN	NaN	NaN	NaN	NaN	21.4656	11.8375	NaN	-3.50919
	8.41526	8.92094	NaN	NaN	NaN	NaN	NaN	NaN	NaN	5.67479	5.93545	NaN	NaN	NaN	NaN	0.0785686	NaN	NaN	NaN	NaN	NaN	NaN	NaN	21.5129	12.1111	NaN	-4.94748
	6.65327	8.10101	NaN	NaN	NaN	NaN	NaN	NaN	NaN	4.43159	5.43354	NaN	NaN	NaN	NaN	0.850388	NaN	NaN	NaN	NaN	NaN	NaN	NaN	21.6969	11.0238	NaN	-5.69037
	7.59242	8.3984	NaN	NaN	NaN	NaN	NaN	NaN	NaN	4.41046	4.34884	NaN	NaN	NaN	NaN	3.28539	NaN	NaN	NaN	NaN	NaN	NaN	NaN	22.4783	13.4564	NaN	-4.51081
	6.7594	9.12388	NaN	NaN	NaN	NaN	NaN	NaN	NaN	4.20009	2.67354	NaN	NaN	NaN	NaN	3.18103	NaN	NaN	NaN	NaN	NaN	NaN	NaN	22.9963	10.5517	NaN	-3.20129
	4.66735	9.2249	NaN	NaN	NaN	NaN	NaN	NaN	NaN	5.06797	1.28636	NaN	NaN	NaN	NaN	5.68019	NaN	NaN	NaN	NaN	NaN	NaN	NaN	22.0217	11.89	NaN	-2.35236
	4.10292	9.11652	NaN	NaN	NaN	NaN	NaN	NaN	NaN	4.46207	1.58474	NaN	NaN	NaN	NaN	0.464478	NaN	NaN	NaN	NaN	NaN	NaN	NaN	19.6614	11.5767	NaN	-3.98812
	5.70232	7.28485	NaN	NaN	NaN	NaN	NaN	NaN	NaN	5.15282	1.60146	NaN	NaN	NaN	NaN	0.314519	NaN	NaN	NaN	NaN	NaN	NaN	NaN	19.4472	12.2156	NaN	-4.59479
	5.28997	8.82557	NaN	NaN	NaN	NaN	NaN	NaN	NaN	2.95674	-0.591191	NaN	NaN	NaN	NaN	-2.38549	NaN	NaN	NaN	NaN	NaN	NaN	NaN	17.3286	9.94415	NaN	-4.67337
	6.50541	13.1141	NaN	NaN	NaN	NaN	NaN	NaN	NaN	2.85384	-0.0726398	NaN	NaN	NaN	NaN	-2.26749	NaN	NaN	NaN	NaN	NaN	NaN	NaN	17.328	11.2209	NaN	-2.77682
	4.8008	9.17071	NaN	NaN	NaN	NaN	NaN	NaN	NaN	2.45508	1.43555	NaN	NaN	NaN	NaN	-3.93484	NaN	NaN	NaN	NaN	NaN	NaN	NaN	16.9334	11.7334	NaN	-12.8771
	5.48185	6.57146	NaN	NaN	NaN	NaN	NaN	NaN	NaN	2.46696	1.5931	NaN	NaN	NaN	NaN	-2.14626	NaN	NaN	NaN	NaN	NaN	NaN	NaN	17.2139	11.2753	NaN	-11.3901
	4.3177	4.081	NaN	NaN	NaN	NaN	NaN	NaN	NaN	2.28846	-5.86316	NaN	NaN	NaN	NaN	-2.58531	NaN	NaN	NaN	NaN	NaN	NaN	NaN	15.1513	7.97606	NaN	-12.5706
	4.48374	6.55052	NaN	NaN	NaN	NaN	NaN	NaN	NaN	2.90976	-0.331915	NaN	NaN	NaN	NaN	1.7796	NaN	NaN	NaN	NaN	NaN	NaN	NaN	16.5389	6.60431	NaN	-7.99906
	3.09127	6.19132	NaN	NaN	NaN	NaN	NaN	NaN	NaN	3.86273	17.792	NaN	NaN	NaN	NaN	0.334575	NaN	NaN	NaN	NaN	NaN	NaN	NaN	14.9511	4.44386	NaN	-7.92311
	3.23774	8.68083	NaN	NaN	NaN	NaN	NaN	NaN	NaN	5.68871	1.51433	NaN	NaN	NaN	NaN	4.064	NaN	NaN	NaN	NaN	NaN	NaN	NaN	15.8814	7.01047	NaN	-6.37025
	0.58757	7.41729	NaN	NaN	NaN	NaN	NaN	NaN	NaN	5.4284	-4.03567	NaN	NaN	NaN	NaN	4.32228	NaN	NaN	NaN	NaN	NaN	NaN	NaN	15.8226	4.4121	NaN	-9.33209
	1.56497	12.2242	NaN	NaN	NaN	NaN	NaN	NaN	NaN	7.02608	-2.63784	NaN	NaN	NaN	NaN	7.17331	NaN	NaN	NaN	NaN	NaN	NaN	NaN	16.4615	5.53672	NaN	-7.94314
	-1.83059	8.75412	NaN	NaN	NaN	NaN	NaN	NaN	NaN	7.04398	-4.32003	NaN	NaN	NaN	NaN	6.55351	NaN	NaN	NaN	NaN	NaN	NaN	NaN	16.59	3.62423	NaN	-8.44871
	-0.890727	9.05284	NaN	NaN	NaN	NaN	NaN	NaN	NaN	8.47002	-1.64225	NaN	NaN	NaN	NaN	7.36437	NaN	NaN	NaN	NaN	NaN	NaN	NaN	20.985	3.63658	NaN	-8.09705
	-1.74614	8.44616	NaN	NaN	NaN	NaN	NaN	NaN	NaN	8.40231	-1.26067	NaN	NaN	NaN	NaN	6.8298	NaN	NaN	NaN	NaN	NaN	NaN	NaN	21.0469	1.83655	NaN	-6.36216
	-1.56297	8.97179	NaN	NaN	NaN	NaN	NaN	NaN	NaN	9.22657	19.4236	NaN	NaN	NaN	NaN	9.95302	NaN	NaN	NaN	NaN	NaN	NaN	NaN	25.4509	2.92889	NaN	-4.23063
	-1.39006	8.9633	NaN	NaN	NaN	NaN	NaN	NaN	NaN	8.86294	21.6189	NaN	NaN	NaN	NaN	8.84182	NaN	NaN	NaN	NaN	NaN	NaN	NaN	25.7531	1.88901	NaN	-2.78882
	-1.65229	9.21333	NaN	NaN	NaN	NaN	NaN	NaN	NaN	9.86047	-2.98114	NaN	NaN	NaN	NaN	10.7367	NaN	NaN	NaN	NaN	NaN	NaN	NaN	28.769	2.9588	NaN	-1.09084
	-1.3658	7.38174	NaN	NaN	NaN	NaN	NaN	NaN	NaN	8.59748	-1.45146	NaN	NaN	NaN	NaN	7.66998	NaN	NaN	NaN	NaN	NaN	NaN	NaN	27.5791	3.62371	NaN	-1.53662
	-0.479448	5.54696	NaN	NaN	NaN	NaN	NaN	NaN	NaN	8.61962	9.08147	NaN	NaN	NaN	NaN	9.60274	NaN	NaN	NaN	NaN	NaN	NaN	NaN	28.7721	6.2224	NaN	-1.59673
	-0.218362	8.06799	NaN	NaN	NaN	NaN	NaN	NaN	NaN	6.62409	-3.35855	NaN	NaN	NaN	NaN	6.7962	NaN	NaN	NaN	NaN	NaN	NaN	NaN	28.1437	4.90616	NaN	-4.60213
	2.1039	7.00671	NaN	NaN	NaN	NaN	NaN	NaN	NaN	6.12875	-1.79846	NaN	NaN	NaN	NaN	6.19206	NaN	NaN	NaN	NaN	NaN	NaN	NaN	28.279	2.4239	NaN	-5.2241
	1.07692	6.72971	NaN	NaN	NaN	NaN	NaN	NaN	NaN	4.04734	-2.48611	NaN	NaN	NaN	NaN	4.29258	NaN	NaN	NaN	NaN	NaN	NaN	NaN	27.5621	7.86448	NaN	-6.03226
	3.09475	7.70672	NaN	NaN	NaN	NaN	NaN	NaN	NaN	2.33831	-0.641143	NaN	NaN	NaN	NaN	3.28733	NaN	NaN	NaN	NaN	NaN	NaN	NaN	27.8948	8.87057	NaN	-5.5328
	2.74943	7.59555	NaN	NaN	NaN	NaN	NaN	NaN	NaN	-0.0593399	-1.93439	NaN	NaN	NaN	NaN	2.11757	NaN	NaN	NaN	NaN	NaN	NaN	NaN	26.108	7.72011	NaN	-6.25937
	0.778487	7.39453	NaN	NaN	NaN	NaN	NaN	NaN	NaN	-0.61471	-1.29538	NaN	NaN	NaN	NaN	2.8509	NaN	NaN	NaN	NaN	NaN	NaN	NaN	26.2779	7.95979	NaN	-3.83177
	-0.0919908	6.62412	NaN	NaN	NaN	NaN	NaN	NaN	NaN	-2.12063	-1.18726	NaN	NaN	NaN	NaN	1.1261	NaN	NaN	NaN	NaN	NaN	NaN	NaN	25.5625	6.90565	NaN	-2.12711
	-0.605309	9.52392	NaN	NaN	NaN	NaN	NaN	NaN	NaN	-1.94068	-0.907572	NaN	NaN	NaN	NaN	1.77376	NaN	NaN	NaN	NaN	NaN	NaN	NaN	26.1233	7.30219	NaN	-0.386752
	-2.44705	9.62273	NaN	NaN	NaN	NaN	NaN	NaN	NaN	-2.29216	-0.342476	NaN	NaN	NaN	NaN	0.0561116	NaN	NaN	NaN	NaN	NaN	NaN	NaN	26.2498	11.3921	NaN	-0.757723
	-1.39895	5.92659	NaN	NaN	NaN	NaN	NaN	NaN	NaN	-1.17159	0.913888	NaN	NaN	NaN	NaN	-1.12659	NaN	NaN	NaN	NaN	NaN	NaN	NaN	26.2386	7.83995	NaN	-1.08471
	-3.26314	7.00932	NaN	NaN	NaN	NaN	NaN	NaN	NaN	-2.0503	-1.22953	NaN	NaN	NaN	NaN	-4.25631	NaN	NaN	NaN	NaN	NaN	NaN	NaN	25.3457	7.43272	NaN	-1.74816
	-3.48408	8.07402	NaN	NaN	NaN	NaN	NaN	NaN	NaN	-0.440017	-0.495996	NaN	NaN	NaN	NaN	-4.58528	NaN	NaN	NaN	NaN	NaN	NaN	NaN	25.8866	9.99461	NaN	-1.49567
	-3.84599	9.57332	NaN	NaN	NaN	NaN	NaN	NaN	NaN	-0.26755	-2.06551	NaN	NaN	NaN	NaN	-8.30024	NaN	NaN	NaN	NaN	NaN	NaN	NaN	24.2337	5.34992	NaN	-0.572238
	-2.3896	14.1374	NaN	NaN	NaN	NaN	NaN	NaN	NaN	1.28528	-2.70047	NaN	NaN	NaN	NaN	-6.19501	NaN	NaN	NaN	NaN	NaN	NaN	NaN	25.4487	5.3902	NaN	-0.921216
	-2.65437	13.9506	NaN	NaN	NaN	NaN	NaN	NaN	NaN	1.87448	-4.8645	NaN	NaN	NaN	NaN	-7.02706	NaN	NaN	NaN	NaN	NaN	NaN	NaN	25.2935	1.09879	NaN	-5.88446
	-2.66318	14.8258	NaN	NaN	NaN	NaN	NaN	NaN	NaN	2.91647	-4.32915	NaN	NaN	NaN	NaN	-4.70812	NaN	NaN	NaN	NaN	NaN	NaN	NaN	25.5423	3.21391	NaN	-3.96624
	-4.41314	14.431	NaN	NaN	NaN	NaN	NaN	NaN	NaN	2.5759	-5.81578	NaN	NaN	NaN	NaN	-7.22254	NaN	NaN	NaN	NaN	NaN	NaN	NaN	20.9362	0.16018	NaN	-5.98143
	-4.96857	15.937	NaN	NaN	NaN	NaN	NaN	NaN	NaN	4.58168	-6.07751	NaN	NaN	NaN	NaN	-4.72879	NaN	NaN	NaN	NaN	NaN	NaN	NaN	22.7227	5.37006	NaN	-6.01435
	-5.20432	15.0475	NaN	NaN	NaN	NaN	NaN	NaN	NaN	3.47183	-7.02353	NaN	NaN	NaN	NaN	-6.86767	NaN	NaN	NaN	NaN	NaN	NaN	NaN	20.356	3.24449	NaN	-9.93555
	-4.12966	18.1303	NaN	NaN	NaN	NaN	NaN	NaN	NaN	3.9048	-6.59789	NaN	NaN	NaN	NaN	-5.57936	NaN	NaN	NaN	NaN	NaN	NaN	NaN	20.6914	3.38191	NaN	-7.36602
	-1.71238	14.9743	NaN	NaN	NaN	NaN	NaN	NaN	NaN	3.47437	-7.79904	NaN	NaN	NaN	NaN	-7.41994	NaN	NaN	NaN	NaN	NaN	NaN	NaN	19.4399	0.666252	NaN	-10.3557
	-1.91349	15.184	NaN	NaN	NaN	NaN	NaN	NaN	NaN	3.48649	-7.81771	NaN	NaN	NaN	NaN	-4.65432	NaN	NaN	NaN	NaN	NaN	NaN	NaN	20.179	2.77484	NaN	-9.8218
	-1.37817	15.4923	NaN	NaN	NaN	NaN	NaN	NaN	NaN	3.14658	-8.81198	NaN	NaN	NaN	NaN	-7.2032	NaN	NaN	NaN	NaN	NaN	NaN	NaN	19.6355	4.30728	NaN	-10.2625
	-0.235272	15.5293	NaN	NaN	NaN	NaN	NaN	NaN	NaN	3.14115	-7.9208	NaN	NaN	NaN	NaN	-3.02811	NaN	NaN	NaN	NaN	NaN	NaN	NaN	21.0617	-1.96421	NaN	-8.90501
	0.37326	13.3336	NaN	NaN	NaN	NaN	NaN	NaN	NaN	2.88476	-11.8262	NaN	NaN	NaN	NaN	-5.79834	NaN	NaN	NaN	NaN	NaN	NaN	NaN	21.0638	2.02408	NaN	-8.51137
	1.47524	13.4334	NaN	NaN	NaN	NaN	NaN	NaN	NaN	2.1388	-7.7025	NaN	NaN	NaN	NaN	-1.1576	NaN	NaN	NaN	NaN	NaN	NaN	NaN	23.4875	1.72055	NaN	-6.14802
	2.33405	12.1286	NaN	NaN	NaN	NaN	NaN	NaN	NaN	2.54722	-8.31484	NaN	NaN	NaN	NaN	-3.10322	NaN	NaN	NaN	NaN	NaN	NaN	NaN	21.324	3.54106	NaN	-6.17102
	4.93414	15.5108	NaN	NaN	NaN	NaN	NaN	NaN	NaN	3.65836	13.0093	NaN	NaN	NaN	NaN	-1.74791	NaN	NaN	NaN	NaN	NaN	NaN	NaN	25.5438	1.17153	NaN	-6.02302
	4.72984	14.4315	NaN	NaN	NaN	NaN	NaN	NaN	NaN	3.33689	12.9102	NaN	NaN	NaN	NaN	-4.33442	NaN	NaN	NaN	NaN	NaN	NaN	NaN	25.3863	-4.90522	NaN	-6.31262
	5.30605	13.3835	NaN	NaN	NaN	NaN	NaN	NaN	NaN	3.54345	10.8024	NaN	NaN	NaN	NaN	-2.91273	NaN	NaN	NaN	NaN	NaN	NaN	NaN	26.2252	-4.0073	NaN	-6.12511
	6.00812	12.781	NaN	NaN	NaN	NaN	NaN	NaN	NaN	2.92393	9.82219	NaN	NaN	NaN	NaN	-2.62174	NaN	NaN	NaN	NaN	NaN	NaN	NaN	25.6895	2.6308	NaN	-6.4362
	8.43519	13.8197	NaN	NaN	NaN	NaN	NaN	NaN	NaN	3.10989	2.34721	NaN	NaN	NaN	NaN	-2.25345	NaN	NaN	NaN	NaN	NaN	NaN	NaN	26.5864	2.3563	NaN	-4.81799
	7.75029	14.9711	NaN	NaN	NaN	NaN	NaN	NaN	NaN	2.33803	12.9597	NaN	NaN	NaN	NaN	-1.96262	NaN	NaN	NaN	NaN	NaN	NaN	NaN	26.0407	-3.29251	NaN	-3.21434
	9.83254	9.286	NaN	NaN	NaN	NaN	NaN	NaN	NaN	2.19694	7.61576	NaN	NaN	NaN	NaN	0.686299	NaN	NaN	NaN	NaN	NaN	NaN	NaN	26.9932	-4.45626	NaN	-1.11617
	10.3069	8.28002	NaN	NaN	NaN	NaN	NaN	NaN	NaN	1.93305	9.59802	NaN	NaN	NaN	NaN	-1.46403	NaN	NaN	NaN	NaN	NaN	NaN	NaN	26.9313	18.3228	NaN	0.272944
	10.4499	8.73512	NaN	NaN	NaN	NaN	NaN	NaN	NaN	2.129	6.0847	NaN	NaN	NaN	NaN	-0.424317	NaN	NaN	NaN	NaN	NaN	NaN	NaN	28.4156	19.2073	NaN	2.32029
	10.4504	7.96857	NaN	NaN	NaN	NaN	NaN	NaN	NaN	1.59209	7.65348	NaN	NaN	NaN	NaN	-0.586185	NaN	NaN	NaN	NaN	NaN	NaN	NaN	28.5998	18.9916	NaN	2.21197
	10.251	10.4775	NaN	NaN	NaN	NaN	NaN	NaN	NaN	3.19692	10.2878	NaN	NaN	NaN	NaN	0.135695	NaN	NaN	NaN	NaN	NaN	NaN	NaN	30.1431	-3.87439	NaN	2.08589
	12.2069	13.2078	NaN	NaN	NaN	NaN	NaN	NaN	NaN	3.97089	8.60689	NaN	NaN	NaN	NaN	-0.0331626	NaN	NaN	NaN	NaN	NaN	NaN	NaN	30.2166	-1.97701	NaN	0.364231
	9.87167	12.0977	NaN	NaN	NaN	NaN	NaN	NaN	NaN	4.80478	15.1602	NaN	NaN	NaN	NaN	-1.93187	NaN	NaN	NaN	NaN	NaN	NaN	NaN	30.6264	-0.110106	NaN	1.29662
	7.9538	15.4702	NaN	NaN	NaN	NaN	NaN	NaN	NaN	4.9407	16.7171	NaN	NaN	NaN	NaN	-2.39745	NaN	NaN	NaN	NaN	NaN	NaN	NaN	31.4381	-0.952294	NaN	-0.105509
	8.43331	16.4589	NaN	NaN	NaN	NaN	NaN	NaN	NaN	8.37285	8.97061	NaN	NaN	NaN	NaN	-0.225245	NaN	NaN	NaN	NaN	NaN	NaN	NaN	34.4604	-0.129092	NaN	-1.50763
	7.78668	15.4049	NaN	NaN	NaN	NaN	NaN	NaN	NaN	7.91462	9.44732	NaN	NaN	NaN	NaN	1.83431	NaN	NaN	NaN	NaN	NaN	NaN	NaN	32.4808	1.20992	NaN	-2.90976
	7.62532	15.5258	NaN	NaN	NaN	NaN	NaN	NaN	NaN	11.1477	11.8836	NaN	NaN	NaN	NaN	4.47174	NaN	NaN	NaN	NaN	NaN	NaN	NaN	35.7202	1.65067	NaN	-1.30122
	5.87808	14.1714	NaN	NaN	NaN	NaN	NaN	NaN	NaN	11.8747	-1.95281	NaN	NaN	NaN	NaN	3.65013	NaN	NaN	NaN	NaN	NaN	NaN	NaN	34.4615	-0.245572	NaN	-0.821181
	6.63184	14.7022	NaN	NaN	NaN	NaN	NaN	NaN	NaN	14.7679	-2.3285	NaN	NaN	NaN	NaN	5.1312	NaN	NaN	NaN	NaN	NaN	NaN	NaN	35.3088	0.750969	NaN	0.573374
	5.78388	14.3466	NaN	NaN	NaN	NaN	NaN	NaN	NaN	15.0665	-4.01107	NaN	NaN	NaN	NaN	3.23598	NaN	NaN	NaN	NaN	NaN	NaN	NaN	34.7744	-2.62272	NaN	-0.380415
	6.59108	14.6041	NaN	NaN	NaN	NaN	NaN	NaN	NaN	15.9045	-4.2889	NaN	NaN	NaN	NaN	3.32693	NaN	NaN	NaN	NaN	NaN	NaN	NaN	34.7521	-0.512591	NaN	-2.23616
	5.02342	13.1126	NaN	NaN	NaN	NaN	NaN	NaN	NaN	15.1809	-6.42067	NaN	NaN	NaN	NaN	2.26918	NaN	NaN	NaN	NaN	NaN	NaN	NaN	33.8371	-2.19839	NaN	-2.03889
	5.87814	12.8414	NaN	NaN	NaN	NaN	NaN	NaN	NaN	15.4995	-7.42816	NaN	NaN	NaN	NaN	2.84728	NaN	NaN	NaN	NaN	NaN	NaN	NaN	33.79	-2.17487	NaN	-1.41945
	4.55329	10.4405	NaN	NaN	NaN	NaN	NaN	NaN	NaN	13.3432	-3.16978	NaN	NaN	NaN	NaN	-1.23906	NaN	NaN	NaN	NaN	NaN	NaN	NaN	32.7633	-3.60488	NaN	-2.59219
	4.69881	10.8651	NaN	NaN	NaN	NaN	NaN	NaN	NaN	12.7639	17.0776	NaN	NaN	NaN	NaN	0.832704	NaN	NaN	NaN	NaN	NaN	NaN	NaN	34.0299	-1.79088	NaN	-1.52477
	3.71291	8.38656	NaN	NaN	NaN	NaN	NaN	NaN	NaN	10.8018	18.4966	NaN	NaN	NaN	NaN	-3.44368	NaN	NaN	NaN	NaN	NaN	NaN	NaN	34.777	-3.86394	NaN	-1.76714
	3.9874	7.61571	NaN	NaN	NaN	NaN	NaN	NaN	NaN	10.1799	17.2918	NaN	NaN	NaN	NaN	-1.44774	NaN	NaN	NaN	NaN	NaN	NaN	NaN	36.3231	-3.13517	NaN	-0.291826
	3.33382	7.09748	NaN	NaN	NaN	NaN	NaN	NaN	NaN	8.04828	16.7325	NaN	NaN	NaN	NaN	-3.7317	NaN	NaN	NaN	NaN	NaN	NaN	NaN	35.3624	-3.28557	NaN	-1.72675
	3.95774	7.30387	NaN	NaN	NaN	NaN	NaN	NaN	NaN	7.26018	6.95392	NaN	NaN	NaN	NaN	-1.57191	NaN	NaN	NaN	NaN	NaN	NaN	NaN	35.4321	-1.49831	NaN	-0.482445
	3.08843	6.47127	NaN	NaN	NaN	NaN	NaN	NaN	NaN	5.38681	17.7871	NaN	NaN	NaN	NaN	-1.30549	NaN	NaN	NaN	NaN	NaN	NaN	NaN	34.636	-4.09127	NaN	-0.541717
	4.01702	8.00113	NaN	NaN	NaN	NaN	NaN	NaN	NaN	4.76155	17.8942	NaN	NaN	NaN	NaN	-6.5848	NaN	NaN	NaN	NaN	NaN	NaN	NaN	35.5659	-3.26351	NaN	-0.282834
	5.33176	7.3566	NaN	NaN	NaN	NaN	NaN	NaN	NaN	0.67188	17.0122	NaN	NaN	NaN	NaN	-8.70833	NaN	NaN	NaN	NaN	NaN	NaN	NaN	34.2659	-7.15616	NaN	-0.989491
	5.56516	5.63019	NaN	NaN	NaN	NaN	NaN	NaN	NaN	-0.262353	13.8426	NaN	NaN	NaN	NaN	-5.73153	NaN	NaN	NaN	NaN	NaN	NaN	NaN	34.1672	-6.2451	NaN	1.3085
	5.03382	4.48793	NaN	NaN	NaN	NaN	NaN	NaN	NaN	-2.27147	13.8143	NaN	NaN	NaN	NaN	-4.93131	NaN	NaN	NaN	NaN	NaN	NaN	NaN	31.8687	-2.79479	NaN	0.785461
	5.03456	5.74203	NaN	NaN	NaN	NaN	NaN	NaN	NaN	-2.28818	17.8407	NaN	NaN	NaN	NaN	-2.8226	NaN	NaN	NaN	NaN	NaN	NaN	NaN	32.4662	9.4032	NaN	1.5122
	5.04512	4.28906	NaN	NaN	NaN	NaN	NaN	NaN	NaN	-3.20129	17.4532	NaN	NaN	NaN	NaN	-4.21922	NaN	NaN	NaN	NaN	NaN	NaN	NaN	30.7494	8.30421	NaN	0.238052
	4.73741	5.22132	NaN	NaN	NaN	NaN	NaN	NaN	NaN	-3.34334	15.4274	NaN	NaN	NaN	NaN	-0.921933	NaN	NaN	NaN	NaN	NaN	NaN	NaN	32.098	10.5995	NaN	2.94342
	5.22812	5.24866	NaN	NaN	NaN	NaN	NaN	NaN	NaN	-5.08648	13.8284	NaN	NaN	NaN	NaN	-4.59051	NaN	NaN	NaN	NaN	NaN	NaN	NaN	31.6146	-4.51994	NaN	2.03775
	4.44151	6.89816	NaN	NaN	NaN	NaN	NaN	NaN	NaN	-5.17326	15.8275	NaN	NaN	NaN	NaN	-1.38727	NaN	NaN	NaN	NaN	NaN	NaN	NaN	31.3717	3.30421	NaN	3.06216
	3.70429	7.64907	NaN	NaN	NaN	NaN	NaN	NaN	NaN	-6.67887	17.6469	NaN	NaN	NaN	NaN	-2.59655	NaN	NaN	NaN	NaN	NaN	NaN	NaN	28.1972	8.85371	NaN	2.24162
	4.15221	8.7044	NaN	NaN	NaN	NaN	NaN	NaN	NaN	-5.44898	9.90107	NaN	NaN	NaN	NaN	-1.69287	NaN	NaN	NaN	NaN	NaN	NaN	NaN	27.7085	9.45186	NaN	2.73753
	3.52622	10.1789	NaN	NaN	NaN	NaN	NaN	NaN	NaN	-7.61223	14.6279	NaN	NaN	NaN	NaN	0.456794	NaN	NaN	NaN	NaN	NaN	NaN	NaN	26.1149	3.03978	NaN	2.76739
	1.69999	7.51643	NaN	NaN	NaN	NaN	NaN	NaN	NaN	-8.85099	-9.40206	NaN	NaN	NaN	NaN	4.24443	NaN	NaN	NaN	NaN	NaN	NaN	NaN	25.0184	-0.607867	NaN	-0.387309
	1.40522	5.97665	NaN	NaN	NaN	NaN	NaN	NaN	NaN	-9.5364	-10.5836	NaN	NaN	NaN	NaN	-1.99191	NaN	NaN	NaN	NaN	NaN	NaN	NaN	22.6131	6.16064	NaN	-1.83638
	1.45942	6.00374	NaN	NaN	NaN	NaN	NaN	NaN	NaN	-7.7142	13.774	NaN	NaN	NaN	NaN	1.13754	NaN	NaN	NaN	NaN	NaN	NaN	NaN	22.1853	8.19538	NaN	-1.68701
	-0.269506	4.80227	NaN	NaN	NaN	NaN	NaN	NaN	NaN	-7.63689	-6.72714	NaN	NaN	NaN	NaN	-2.38686	NaN	NaN	NaN	NaN	NaN	NaN	NaN	21.3026	5.90236	NaN	-3.96599
	0.867693	6.19156	NaN	NaN	NaN	NaN	NaN	NaN	NaN	-6.07067	-5.96442	NaN	NaN	NaN	NaN	-1.60996	NaN	NaN	NaN	NaN	NaN	NaN	NaN	22.4737	9.90884	NaN	-3.13847
	0.961375	5.0712	NaN	NaN	NaN	NaN	NaN	NaN	NaN	-5.3063	-8.82905	NaN	NaN	NaN	NaN	-4.05702	NaN	NaN	NaN	NaN	NaN	NaN	NaN	19.4959	8.50865	NaN	-6.07108
	2.26663	7.15057	NaN	NaN	NaN	NaN	NaN	NaN	NaN	-3.56913	-9.97203	NaN	NaN	NaN	NaN	-4.05701	NaN	NaN	NaN	NaN	NaN	NaN	NaN	20.9325	7.17801	NaN	-4.89676
	3.0965	3.70554	NaN	NaN	NaN	NaN	NaN	NaN	NaN	-3.85769	3.52343	NaN	NaN	NaN	NaN	-5.06718	NaN	NaN	NaN	NaN	NaN	NaN	NaN	16.9631	7.04887	NaN	-6.62518
	4.87069	6.60185	NaN	NaN	NaN	NaN	NaN	NaN	NaN	-2.91142	-6.34578	NaN	NaN	NaN	NaN	-1.46117	NaN	NaN	NaN	NaN	NaN	NaN	NaN	16.8926	7.9056	NaN	-6.43472
	4.15899	3.11983	NaN	NaN	NaN	NaN	NaN	NaN	NaN	-2.60134	-7.39673	NaN	NaN	NaN	NaN	-3.07141	NaN	NaN	NaN	NaN	NaN	NaN	NaN	16.4922	-7.0212	NaN	-8.47763
	4.67604	3.42788	NaN	NaN	NaN	NaN	NaN	NaN	NaN	-2.45101	-9.40054	NaN	NaN	NaN	NaN	-4.05702	NaN	NaN	NaN	NaN	NaN	NaN	NaN	16.8971	-2.79023	NaN	-7.43543
	4.52247	-0.592662	NaN	NaN	NaN	NaN	NaN	NaN	NaN	-2.17369	-9.23624	NaN	NaN	NaN	NaN	2.35688	NaN	NaN	NaN	NaN	NaN	NaN	NaN	17.1869	-1.86908	NaN	-8.38553
	5.57884	1.32558	NaN	NaN	NaN	NaN	NaN	NaN	NaN	-1.14679	-8.50206	NaN	NaN	NaN	NaN	6.11543	NaN	NaN	NaN	NaN	NaN	NaN	NaN	17.9001	7.47723	NaN	-6.74833
	6.18855	1.91361	NaN	NaN	NaN	NaN	NaN	NaN	NaN	-1.85908	-9.07124	NaN	NaN	NaN	NaN	4.17915	NaN	NaN	NaN	NaN	NaN	NaN	NaN	15.6139	5.84232	NaN	-8.13824
	7.50472	4.02281	NaN	NaN	NaN	NaN	NaN	NaN	NaN	-1.35148	-9.47755	NaN	NaN	NaN	NaN	6.2258	NaN	NaN	NaN	NaN	NaN	NaN	NaN	15.7779	-4.90571	NaN	-8.75774
	7.04037	2.18166	NaN	NaN	NaN	NaN	NaN	NaN	NaN	-1.9505	-10.522	NaN	NaN	NaN	NaN	4.87996	NaN	NaN	NaN	NaN	NaN	NaN	NaN	14.0389	12.8037	NaN	-9.51634
	8.07632	0.366458	NaN	NaN	NaN	NaN	NaN	NaN	NaN	-2.04042	-11.29	NaN	NaN	NaN	NaN	5.01104	NaN	NaN	NaN	NaN	NaN	NaN	NaN	12.9761	14.8451	NaN	-7.51693
	5.31462	1.61959	NaN	NaN	NaN	NaN	NaN	NaN	NaN	-2.15848	-8.78665	NaN	NaN	NaN	NaN	2.5043	NaN	NaN	NaN	NaN	NaN	NaN	NaN	16.757	14.6339	NaN	-8.87288
	5.39465	2.96821	NaN	NaN	NaN	NaN	NaN	NaN	NaN	-1.93704	-9.2744	NaN	NaN	NaN	NaN	1.99899	NaN	NaN	NaN	NaN	NaN	NaN	NaN	8.8675	15.3458	NaN	-8.35081
	1.51909	3.10224	NaN	NaN	NaN	NaN	NaN	NaN	NaN	-2.35624	-9.99976	NaN	NaN	NaN	NaN	-0.5266	NaN	NaN	NaN	NaN	NaN	NaN	NaN	8.58523	12.4223	NaN	-10.2726
	1.02289	1.27406	NaN	NaN	NaN	NaN	NaN	NaN	NaN	-1.02206	13.8391	NaN	NaN	NaN	NaN	0.965273	NaN	NaN	NaN	NaN	NaN	NaN	NaN	7.20242	13.2656	NaN	-7.97787
	-2.0586	0.993026	NaN	NaN	NaN	NaN	NaN	NaN	NaN	-0.748422	13.0325	NaN	NaN	NaN	NaN	0.395533	NaN	NaN	NaN	NaN	NaN	NaN	NaN	7.89248	11.2459	NaN	-11.2182
	-3.59881	2.51083	NaN	NaN	NaN	NaN	NaN	NaN	NaN	1.12885	12.7492	NaN	NaN	NaN	NaN	0.63983	NaN	NaN	NaN	NaN	NaN	NaN	NaN	8.97919	14.9898	NaN	-10.708
	-3.73085	3.26115	NaN	NaN	NaN	NaN	NaN	NaN	NaN	0.658643	14.0684	NaN	NaN	NaN	NaN	-0.718539	NaN	NaN	NaN	NaN	NaN	NaN	NaN	8.50877	12.6724	NaN	-12.6781
	-2.83887	4.54569	NaN	NaN	NaN	NaN	NaN	NaN	NaN	1.63426	13.8326	NaN	NaN	NaN	NaN	-0.296633	NaN	NaN	NaN	NaN	NaN	NaN	NaN	8.68449	13.907	NaN	-12.3815
	-2.76208	4.85929	NaN	NaN	NaN	NaN	NaN	NaN	NaN	0.43071	12.9658	NaN	NaN	NaN	NaN	-3.17515	NaN	NaN	NaN	NaN	NaN	NaN	NaN	7.3669	10.9794	NaN	-13.2891
	-1.80663	1.75193	NaN	NaN	NaN	NaN	NaN	NaN	NaN	0.754843	14.5996	NaN	NaN	NaN	NaN	-1.43812	NaN	NaN	NaN	NaN	NaN	NaN	NaN	7.90267	11.9663	NaN	-13.1723
	-2.38044	2.88599	NaN	NaN	NaN	NaN	NaN	NaN	NaN	0.760745	15.4902	NaN	NaN	NaN	NaN	-3.6872	NaN	NaN	NaN	NaN	NaN	NaN	NaN	7.1551	8.21734	NaN	-13.8745
	-3.03762	10.9287	NaN	NaN	NaN	NaN	NaN	NaN	NaN	0.681133	15.2256	NaN	NaN	NaN	NaN	0.00672729	NaN	NaN	NaN	NaN	NaN	NaN	NaN	8.38851	7.7399	NaN	-12.8408
	-3.83396	9.05534	NaN	NaN	NaN	NaN	NaN	NaN	NaN	1.43984	13.3992	NaN	NaN	NaN	NaN	-1.41069	NaN	NaN	NaN	NaN	NaN	NaN	NaN	8.30027	7.29554	NaN	-10.7674
	-5.91424	8.48127	NaN	NaN	NaN	NaN	NaN	NaN	NaN	1.77867	-1.27101	NaN	NaN	NaN	NaN	1.68016	NaN	NaN	NaN	NaN	NaN	NaN	NaN	10.8121	6.86212	NaN	-10.956
	-6.20135	7.91347	NaN	NaN	NaN	NaN	NaN	NaN	NaN	0.652307	-1.73541	NaN	NaN	NaN	NaN	-1.25311	NaN	NaN	NaN	NaN	NaN	NaN	NaN	9.69566	2.22426	NaN	-11.6063
	-5.76045	8.19437	NaN	NaN	NaN	NaN	NaN	NaN	NaN	0.0262034	-0.631287	NaN	NaN	NaN	NaN	2.08695	NaN	NaN	NaN	NaN	NaN	NaN	NaN	11.6063	4.30665	NaN	-10.4743
	-6.04794	6.91251	NaN	NaN	NaN	NaN	NaN	NaN	NaN	-1.71449	-2.39729	NaN	NaN	NaN	NaN	0.162936	NaN	NaN	NaN	NaN	NaN	NaN	NaN	10.398	1.37319	NaN	-11.9093
	-5.82188	8.24788	NaN	NaN	NaN	NaN	NaN	NaN	NaN	-2.20774	-3.00788	NaN	NaN	NaN	NaN	0.681295	NaN	NaN	NaN	NaN	NaN	NaN	NaN	10.0734	2.85533	NaN	-11.3249
	-5.43174	6.19003	NaN	NaN	NaN	NaN	NaN	NaN	NaN	-2.38884	-3.5552	NaN	NaN	NaN	NaN	-2.06204	NaN	NaN	NaN	NaN	NaN	NaN	NaN	7.28213	0.0444383	NaN	-11.5049
	-3.94591	7.32515	NaN	NaN	NaN	NaN	NaN	NaN	NaN	-2.53602	-4.48742	NaN	NaN	NaN	NaN	-0.925932	NaN	NaN	NaN	NaN	NaN	NaN	NaN	6.98595	-0.144021	NaN	-9.90005
	-4.60904	5.02229	NaN	NaN	NaN	NaN	NaN	NaN	NaN	-3.24223	-1.51429	NaN	NaN	NaN	NaN	0.135968	NaN	NaN	NaN	NaN	NaN	NaN	NaN	5.921	-1.43416	NaN	-8.94207
	-4.69909	4.17104	NaN	NaN	NaN	NaN	NaN	NaN	NaN	-2.70143	-2.70259	NaN	NaN	NaN	NaN	0.422115	NaN	NaN	NaN	NaN	NaN	NaN	NaN	6.58366	-1.39665	NaN	-7.34617
	-5.03538	3.01974	NaN	NaN	NaN	NaN	NaN	NaN	NaN	-3.08429	-6.32926	NaN	NaN	NaN	NaN	5.85688	NaN	NaN	NaN	NaN	NaN	NaN	NaN	5.88765	-1.50231	NaN	-7.44529
	-5.17364	3.5064	NaN	NaN	NaN	NaN	NaN	NaN	NaN	-1.75843	-5.78271	NaN	NaN	NaN	NaN	7.48366	NaN	NaN	NaN	NaN	NaN	NaN	NaN	7.27869	0.27244	NaN	-6.45136
	-5.68116	3.09252	NaN	NaN	NaN	NaN	NaN	NaN	NaN	-1.49748	-8.20219	NaN	NaN	NaN	NaN	6.45738	NaN	NaN	NaN	NaN	NaN	NaN	NaN	6.80764	-0.789092	NaN	-6.37698
	-4.33824	2.48635	NaN	NaN	NaN	NaN	NaN	NaN	NaN	0.136347	-10.2225	NaN	NaN	NaN	NaN	7.4567	NaN	NaN	NaN	NaN	NaN	NaN	NaN	8.75383	-1.41541	NaN	-6.37309
	-4.973	0.349681	NaN	NaN	NaN	NaN	NaN	NaN	NaN	-1.13829	-10.4755	NaN	NaN	NaN	NaN	6.10372	NaN	NaN	NaN	NaN	NaN	NaN	NaN	8.23183	-5.20312	NaN	-6.45549
	-3.92719	3.26307	NaN	NaN	NaN	NaN	NaN	NaN	NaN	-0.394714	-10.9742	NaN	NaN	NaN	NaN	8.43953	NaN	NaN	NaN	NaN	NaN	NaN	NaN	8.28142	-5.18086	NaN	-5.77173
	-4.65372	3.29946	NaN	NaN	NaN	NaN	NaN	NaN	NaN	-0.670636	-12.5134	NaN	NaN	NaN	NaN	6.94647	NaN	NaN	NaN	NaN	NaN	NaN	NaN	7.80524	-6.24776	NaN	-6.69375
	-3.8331	2.78943	NaN	NaN	NaN	NaN	NaN	NaN	NaN	-0.382511	-12.0666	NaN	NaN	NaN	NaN	8.97007	NaN	NaN	NaN	NaN	NaN	NaN	NaN	7.86994	-5.82825	NaN	-6.2556
	-4.08403	1.41802	NaN	NaN	NaN	NaN	NaN	NaN	NaN	-0.701079	-10.349	NaN	NaN	NaN	NaN	7.01935	NaN	NaN	NaN	NaN	NaN	NaN	NaN	6.73243	-3.30927	NaN	-8.48799
	-3.43404	1.19997	NaN	NaN	NaN	NaN	NaN	NaN	NaN	-0.792909	-10.7248	NaN	NaN	NaN	NaN	8.54152	NaN	NaN	NaN	NaN	NaN	NaN	NaN	7.37548	-5.19199	NaN	-6.82533
	-4.42039	-0.535874	NaN	NaN	NaN	NaN	NaN	NaN	NaN	-0.958786	-11.7438	NaN	NaN	NaN	NaN	4.7339	NaN	NaN	NaN	NaN	NaN	NaN	NaN	6.17777	-6.09789	NaN	-9.64582
	-4.32964	-0.0632768	NaN	NaN	NaN	NaN	NaN	NaN	NaN	-0.965271	-12.29	NaN	NaN	NaN	NaN	4.9844	NaN	NaN	NaN	NaN	NaN	NaN	NaN	8.53569	-6.038	NaN	-10.5327
	-5.98559	-3.62031	NaN	NaN	NaN	NaN	NaN	NaN	NaN	-0.642901	-11.2078	NaN	NaN	NaN	NaN	1.93916	NaN	NaN	NaN	NaN	NaN	NaN	NaN	7.30118	-4.08139	NaN	-13.9233
	-5.30763	1.30899	NaN	NaN	NaN	NaN	NaN	NaN	NaN	-0.0242638	12.5133	NaN	NaN	NaN	NaN	2.72524	NaN	NaN	NaN	NaN	NaN	NaN	NaN	4.51923	-1.43771	NaN	-13.0894
	-6.82143	0.332046	NaN	NaN	NaN	NaN	NaN	NaN	NaN	-0.773241	13.6682	NaN	NaN	NaN	NaN	0.762891	NaN	NaN	NaN	NaN	NaN	NaN	NaN	2.64388	-1.74907	NaN	-15.4477
	-5.99422	-0.299575	NaN	NaN	NaN	NaN	NaN	NaN	NaN	-0.657471	13.73	NaN	NaN	NaN	NaN	0.888158	NaN	NaN	NaN	NaN	NaN	NaN	NaN	2.29977	-1.44298	NaN	-15.1742
	-6.87857	-1.84179	NaN	NaN	NaN	NaN	NaN	NaN	NaN	-0.361408	13.3521	NaN	NaN	NaN	NaN	-1.20875	NaN	NaN	NaN	NaN	NaN	NaN	NaN	-0.0513167	-2.38085	NaN	-14.663
	-5.81678	-3.16674	NaN	NaN	NaN	NaN	NaN	NaN	NaN	0.208169	0.652731	NaN	NaN	NaN	NaN	1.54075	NaN	NaN	NaN	NaN	NaN	NaN	NaN	0.195274	-0.681173	NaN	-14.5075
	-6.22879	-7.31739	NaN	NaN	NaN	NaN	NaN	NaN	NaN	1.06235	-8.71337	NaN	NaN	NaN	NaN	-1.48805	NaN	NaN	NaN	NaN	NaN	NaN	NaN	-0.641776	-2.71928	NaN	-14.2717
	-6.20049	-7.41247	NaN	NaN	NaN	NaN	NaN	NaN	NaN	2.53856	-6.27868	NaN	NaN	NaN	NaN	1.09269	NaN	NaN	NaN	NaN	NaN	NaN	NaN	-0.282655	0.941771	NaN	-12.1541
	-5.41553	-6.49063	NaN	NaN	NaN	NaN	NaN	NaN	NaN	5.39084	-6.39589	NaN	NaN	NaN	NaN	-0.265259	NaN	NaN	NaN	NaN	NaN	NaN	NaN	0.896563	2.73738	NaN	-13.307
	-6.3089	-7.89558	NaN	NaN	NaN	NaN	NaN	NaN	NaN	6.67476	-9.05034	NaN	NaN	NaN	NaN	1.57817	NaN	NaN	NaN	NaN	NaN	NaN	NaN	2.72727	-1.53101	NaN	-13.3513
	-5.74655	-8.73216	NaN	NaN	NaN	NaN	NaN	NaN	NaN	6.8166	-4.03032	NaN	NaN	NaN	NaN	0.766876	NaN	NaN	NaN	NaN	NaN	NaN	NaN	2.62235	4.8448	NaN	-12.0591
	-3.18695	-4.84625	NaN	NaN	NaN	NaN	NaN	NaN	NaN	7.48028	-7.49602	NaN	NaN	NaN	NaN	1.3501	NaN	NaN	NaN	NaN	NaN	NaN	NaN	2.25523	4.84862	NaN	-11.7708
	-3.29096	-4.6995	NaN	NaN	NaN	NaN	NaN	NaN	NaN	6.61317	-8.18658	NaN	NaN	NaN	NaN	-0.581987	NaN	NaN	NaN	NaN	NaN	NaN	NaN	2.22547	3.70585	NaN	-11.0937
	-0.968272	-7.19311	NaN	NaN	NaN	NaN	NaN	NaN	NaN	6.94183	-6.44774	NaN	NaN	NaN	NaN	2.26123	NaN	NaN	NaN	NaN	NaN	NaN	NaN	2.50668	3.26449	NaN	-7.94845
	-0.75204	-8.31387	NaN	NaN	NaN	NaN	NaN	NaN	NaN	6.41057	-6.0292	NaN	NaN	NaN	NaN	0.429694	NaN	NaN	NaN	NaN	NaN	NaN	NaN	2.62865	1.9146	NaN	-4.80269
	1.71791	-2.99994	NaN	NaN	NaN	NaN	NaN	NaN	NaN	6.55683	-3.16608	NaN	NaN	NaN	NaN	4.75865	NaN	NaN	NaN	NaN	NaN	NaN	NaN	3.10205	2.72887	NaN	-1.58194
	1.55366	-2.73825	NaN	NaN	NaN	NaN	NaN	NaN	NaN	5.11918	-3.10414	NaN	NaN	NaN	NaN	1.45249	NaN	NaN	NaN	NaN	NaN	NaN	NaN	4.25685	1.35014	NaN	-2.62674
	2.29086	-1.32029	NaN	NaN	NaN	NaN	NaN	NaN	NaN	5.47368	-1.78922	NaN	NaN	NaN	NaN	3.12089	NaN	NaN	NaN	NaN	NaN	NaN	NaN	5.17398	3.83038	NaN	-0.891301
	1.52585	0.840301	NaN	NaN	NaN	NaN	NaN	NaN	NaN	2.28887	-4.66691	NaN	NaN	NaN	NaN	0.558756	NaN	NaN	NaN	NaN	NaN	NaN	NaN	5.68627	0.815965	NaN	-3.58594
	3.1989	4.32687	NaN	NaN	NaN	NaN	NaN	NaN	NaN	2.42532	-7.76239	NaN	NaN	NaN	NaN	-0.0692251	NaN	NaN	NaN	NaN	NaN	NaN	NaN	5.47777	4.46557	NaN	-2.33503
	1.75326	4.96397	NaN	NaN	NaN	NaN	NaN	NaN	NaN	0.442024	-3.13511	NaN	NaN	NaN	NaN	3.10557	NaN	NaN	NaN	NaN	NaN	NaN	NaN	5.34375	-0.080861	NaN	-5.64607
	3.09968	-2.02927	NaN	NaN	NaN	NaN	NaN	NaN	NaN	0.318777	12.8208	NaN	NaN	NaN	NaN	-6.7247	NaN	NaN	NaN	NaN	NaN	NaN	NaN	5.51483	0.453003	NaN	-4.44947
	2.9631	7.00802	NaN	NaN	NaN	NaN	NaN	NaN	NaN	-2.83757	12.7921	NaN	NaN	NaN	NaN	-9.51571	NaN	NaN	NaN	NaN	NaN	NaN	NaN	5.22566	-3.18226	NaN	-5.03408
	4.11944	11.635	NaN	NaN	NaN	NaN	NaN	NaN	NaN	-2.7591	13.8101	NaN	NaN	NaN	NaN	-7.63384	NaN	NaN	NaN	NaN	NaN	NaN	NaN	5.02203	-1.42336	NaN	-4.06689
	2.65711	9.90186	NaN	NaN	NaN	NaN	NaN	NaN	NaN	-4.90877	12.8902	NaN	NaN	NaN	NaN	-10.65	NaN	NaN	NaN	NaN	NaN	NaN	NaN	4.84682	-5.21997	NaN	-4.81771
	2.35023	11.8527	NaN	NaN	NaN	NaN	NaN	NaN	NaN	-5.48953	15.1866	NaN	NaN	NaN	NaN	-1.80957	NaN	NaN	NaN	NaN	NaN	NaN	NaN	5.28143	-0.841562	NaN	-2.60661
	1.54817	10.8782	NaN	NaN	NaN	NaN	NaN	NaN	NaN	-7.32715	14.8727	NaN	NaN	NaN	NaN	-10.532	NaN	NaN	NaN	NaN	NaN	NaN	NaN	5.14638	-1.36463	NaN	-4.35955
	1.71039	11.2625	NaN	NaN	NaN	NaN	NaN	NaN	NaN	-6.90231	15.7933	NaN	NaN	NaN	NaN	-8.85752	NaN	NaN	NaN	NaN	NaN	NaN	NaN	6.21181	-3.71712	NaN	-2.60129
	-1.5357	9.63865	NaN	NaN	NaN	NaN	NaN	NaN	NaN	-8.88458	15.5927	NaN	NaN	NaN	NaN	-10.3247	NaN	NaN	NaN	NaN	NaN	NaN	NaN	4.10601	-6.94635	NaN	-2.711
	-2.29577	9.77314	NaN	NaN	NaN	NaN	NaN	NaN	NaN	-8.67417	16.1127	NaN	NaN	NaN	NaN	-9.30111	NaN	NaN	NaN	NaN	NaN	NaN	NaN	5.3848	-5.83731	NaN	-2.58949
	-4.24008	8.06016	NaN	NaN	NaN	NaN	NaN	NaN	NaN	-9.46242	15.7224	NaN	NaN	NaN	NaN	-8.31439	NaN	NaN	NaN	NaN	NaN	NaN	NaN	3.70448	-9.06421	NaN	-2.89142
	-3.88252	9.00223	NaN	NaN	NaN	NaN	NaN	NaN	NaN	-9.54045	14.9854	NaN	NaN	NaN	NaN	-9.69476	NaN	NaN	NaN	NaN	NaN	NaN	NaN	3.18244	-2.54088	NaN	-1.45514
	-5.31067	8.33046	NaN	NaN	NaN	NaN	NaN	NaN	NaN	-9.32578	16.4085	NaN	NaN	NaN	NaN	-2.8239	NaN	NaN	NaN	NaN	NaN	NaN	NaN	1.21868	7.47408	NaN	-2.0268
	-4.37976	8.81938	NaN	NaN	NaN	NaN	NaN	NaN	NaN	-8.70793	15.8527	NaN	NaN	NaN	NaN	-1.24422	NaN	NaN	NaN	NaN	NaN	NaN	NaN	0.696199	6.55169	NaN	1.48404
	-5.49534	6.57762	NaN	NaN	NaN	NaN	NaN	NaN	NaN	-7.70808	15.9175	NaN	NaN	NaN	NaN	-1.11248	NaN	NaN	NaN	NaN	NaN	NaN	NaN	0.431125	4.61251	NaN	1.99106
	-5.42007	5.76221	NaN	NaN	NaN	NaN	NaN	NaN	NaN	-4.22753	15.3539	NaN	NaN	NaN	NaN	-9.00458	NaN	NaN	NaN	NaN	NaN	NaN	NaN	0.644979	-5.80255	NaN	2.48141
	-4.66951	1.58694	NaN	NaN	NaN	NaN	NaN	NaN	NaN	-2.23284	-8.24594	NaN	NaN	NaN	NaN	0.741149	NaN	NaN	NaN	NaN	NaN	NaN	NaN	-0.031285	2.4666	NaN	0.586925
	-3.6855	1.47821	NaN	NaN	NaN	NaN	NaN	NaN	NaN	1.76058	-7.65505	NaN	NaN	NaN	NaN	4.05991	NaN	NaN	NaN	NaN	NaN	NaN	NaN	1.337	6.25124	NaN	0.930419
	-1.72763	-1.24504	NaN	NaN	NaN	NaN	NaN	NaN	NaN	2.79371	-7.70081	NaN	NaN	NaN	NaN	2.02164	NaN	NaN	NaN	NaN	NaN	NaN	NaN	0.832461	4.63369	NaN	-1.52841
	0.174607	6.16992	NaN	NaN	NaN	NaN	NaN	NaN	NaN	5.03845	15.6357	NaN	NaN	NaN	NaN	-1.34289	NaN	NaN	NaN	NaN	NaN	NaN	NaN	-1.27366	-0.595018	NaN	2.23624
	0.647507	3.67458	NaN	NaN	NaN	NaN	NaN	NaN	NaN	4.62665	13.8082	NaN	NaN	NaN	NaN	-2.32313	NaN	NaN	NaN	NaN	NaN	NaN	NaN	-3.10978	-0.265422	NaN	-6.32912
	2.04671	1.53257	NaN	NaN	NaN	NaN	NaN	NaN	NaN	4.3901	16.0382	NaN	NaN	NaN	NaN	-0.48062	NaN	NaN	NaN	NaN	NaN	NaN	NaN	-3.91674	-1.26739	NaN	-8.87042
	1.41036	0.116583	NaN	NaN	NaN	NaN	NaN	NaN	NaN	4.06243	15.3526	NaN	NaN	NaN	NaN	1.35111	NaN	NaN	NaN	NaN	NaN	NaN	NaN	-7.62842	-2.00787	NaN	-10.3395
	2.90423	0.543205	NaN	NaN	NaN	NaN	NaN	NaN	NaN	5.38113	14.1796	NaN	NaN	NaN	NaN	6.12875	NaN	NaN	NaN	NaN	NaN	NaN	NaN	-7.91432	-2.68857	NaN	-9.25599
	1.97936	4.92225	NaN	NaN	NaN	NaN	NaN	NaN	NaN	5.18025	14.7492	NaN	NaN	NaN	NaN	5.4332	NaN	NaN	NaN	NaN	NaN	NaN	NaN	-9.15653	-3.98775	NaN	-10.9376
	1.70997	-2.56908	NaN	NaN	NaN	NaN	NaN	NaN	NaN	6.75837	14.9232	NaN	NaN	NaN	NaN	8.22653	NaN	NaN	NaN	NaN	NaN	NaN	NaN	-8.92678	-2.98432	NaN	-10.3324
	2.47725	-3.20394	NaN	NaN	NaN	NaN	NaN	NaN	NaN	7.12741	-9.4901	NaN	NaN	NaN	NaN	5.46151	NaN	NaN	NaN	NaN	NaN	NaN	NaN	-10.4631	-3.90046	NaN	-11.9119
	2.61967	-0.0601611	NaN	NaN	NaN	NaN	NaN	NaN	NaN	8.57717	-8.75737	NaN	NaN	NaN	NaN	4.98587	NaN	NaN	NaN	NaN	NaN	NaN	NaN	-8.00104	-2.34822	NaN	-11.9434
	2.36587	-3.42044	NaN	NaN	NaN	NaN	NaN	NaN	NaN	7.51669	14.4644	NaN	NaN	NaN	NaN	1.86343	NaN	NaN	NaN	NaN	NaN	NaN	NaN	-8.44245	0.197611	NaN	-11.9837
	4.28208	-2.45419	NaN	NaN	NaN	NaN	NaN	NaN	NaN	6.8481	10.3113	NaN	NaN	NaN	NaN	1.86907	NaN	NaN	NaN	NaN	NaN	NaN	NaN	-8.48963	1.06881	NaN	-11.3433
	2.08345	-0.111521	NaN	NaN	NaN	NaN	NaN	NaN	NaN	3.83901	10.6006	NaN	NaN	NaN	NaN	-1.78937	NaN	NaN	NaN	NaN	NaN	NaN	NaN	-12.1779	1.29626	NaN	-11.1984
	2.27432	3.81428	NaN	NaN	NaN	NaN	NaN	NaN	NaN	3.44869	-9.12374	NaN	NaN	NaN	NaN	2.22942	NaN	NaN	NaN	NaN	NaN	NaN	NaN	-9.12456	1.79058	NaN	-8.20497
	-1.05593	2.86596	NaN	NaN	NaN	NaN	NaN	NaN	NaN	1.40973	-12.5591	NaN	NaN	NaN	NaN	3.42465	NaN	NaN	NaN	NaN	NaN	NaN	NaN	-10.2569	5.75041	NaN	-8.21918
	-1.67218	5.89012	NaN	NaN	NaN	NaN	NaN	NaN	NaN	0.7343	-9.45699	NaN	NaN	NaN	NaN	-2.45137	NaN	NaN	NaN	NaN	NaN	NaN	NaN	-10.396	7.43007	NaN	-11.6635
	-5.50778	1.81793	NaN	NaN	NaN	NaN	NaN	NaN	NaN	1.21178	10.456	NaN	NaN	NaN	NaN	-4.36018	NaN	NaN	NaN	NaN	NaN	NaN	NaN	-11.3659	1.18253	NaN	-2.90962
	-6.62693	2.24437	NaN	NaN	NaN	NaN	NaN	NaN	NaN	1.54678	0.738455	NaN	NaN	NaN	NaN	-1.49177	NaN	NaN	NaN	NaN	NaN	NaN	NaN	-10.4224	-9.41707	NaN	-2.10292
	-9.03481	0.0151907	NaN	NaN	NaN	NaN	NaN	NaN	NaN	1.202	-10.8414	NaN	NaN	NaN	NaN	-3.68751	NaN	NaN	NaN	NaN	NaN	NaN	NaN	-11.2915	-11.098	NaN	-2.13868
	-9.10627	2.01003	NaN	NaN	NaN	NaN	NaN	NaN	NaN	1.04634	8.73107	NaN	NaN	NaN	NaN	-4.35975	NaN	NaN	NaN	NaN	NaN	NaN	NaN	-8.96827	-10.681	NaN	-1.85268
	-9.95327	0.944653	NaN	NaN	NaN	NaN	NaN	NaN	NaN	0.389395	8.29388	NaN	NaN	NaN	NaN	-6.76623	NaN	NaN	NaN	NaN	NaN	NaN	NaN	-9.85133	4.3063	NaN	-2.08721
	-10.0224	0.0571073	NaN	NaN	NaN	NaN	NaN	NaN	NaN	0.331362	5.59722	NaN	NaN	NaN	NaN	-5.64709	NaN	NaN	NaN	NaN	NaN	NaN	NaN	-8.88334	-4.11727	NaN	1.61885
	-9.84288	-3.63102	NaN	NaN	NaN	NaN	NaN	NaN	NaN	-0.451375	-5.05149	NaN	NaN	NaN	NaN	-6.83088	NaN	NaN	NaN	NaN	NaN	NaN	NaN	-8.10715	-10.2575	NaN	2.69183
	-8.27236	-1.5151	NaN	NaN	NaN	NaN	NaN	NaN	NaN	-0.624232	-1.05519	NaN	NaN	NaN	NaN	-3.12789	NaN	NaN	NaN	NaN	NaN	NaN	NaN	-4.30297	-10.8895	NaN	7.14728
	-7.78548	-3.17186	NaN	NaN	NaN	NaN	NaN	NaN	NaN	-0.588887	-9.5467	NaN	NaN	NaN	NaN	-5.96303	NaN	NaN	NaN	NaN	NaN	NaN	NaN	-1.54089	-12.0446	NaN	7.47693
	-6.70907	-4.01769	NaN	NaN	NaN	NaN	NaN	NaN	NaN	0.24173	-9.17048	NaN	NaN	NaN	NaN	-5.12948	NaN	NaN	NaN	NaN	NaN	NaN	NaN	1.18995	-11.8662	NaN	-0.23418
	-6.90812	-3.983	NaN	NaN	NaN	NaN	NaN	NaN	NaN	0.743578	-8.51322	NaN	NaN	NaN	NaN	-5.22398	NaN	NaN	NaN	NaN	NaN	NaN	NaN	2.5906	-14.1881	NaN	12.2866
	-6.05497	-1.85567	NaN	NaN	NaN	NaN	NaN	NaN	NaN	1.77526	-7.15125	NaN	NaN	NaN	NaN	-4.05544	NaN	NaN	NaN	NaN	NaN	NaN	NaN	6.12131	-10.5735	NaN	12.8968
	-5.1416	-2.97245	NaN	NaN	NaN	NaN	NaN	NaN	NaN	2.84987	-7.12763	NaN	NaN	NaN	NaN	-6.19826	NaN	NaN	NaN	NaN	NaN	NaN	NaN	4.61116	7.11427	NaN	12.8152
	-4.59017	0.48718	NaN	NaN	NaN	NaN	NaN	NaN	NaN	4.20918	-7.15199	NaN	NaN	NaN	NaN	-6.59614	NaN	NaN	NaN	NaN	NaN	NaN	NaN	6.22022	7.61445	NaN	14.5403
	-3.4212	1.35473	NaN	NaN	NaN	NaN	NaN	NaN	NaN	5.00361	-6.71175	NaN	NaN	NaN	NaN	-6.80042	NaN	NaN	NaN	NaN	NaN	NaN	NaN	2.42357	4.63525	NaN	17.4697
	-1.86891	1.54174	NaN	NaN	NaN	NaN	NaN	NaN	NaN	5.90635	-7.83224	NaN	NaN	NaN	NaN	-7.78548	NaN	NaN	NaN	NaN	NaN	NaN	NaN	0.864826	1.15451	NaN	19.8156
	-2.9599	-1.06315	NaN	NaN	NaN	NaN	NaN	NaN	NaN	6.2879	15.6615	NaN	NaN	NaN	NaN	-7.88504	NaN	NaN	NaN	NaN	NaN	NaN	NaN	2.33646	0.236948	NaN	20.281
	-2.38445	2.92166	NaN	NaN	NaN	NaN	NaN	NaN	NaN	9.26209	17.355	NaN	NaN	NaN	NaN	-4.32599	NaN	NaN	NaN	NaN	NaN	NaN	NaN	4.43044	1.62136	NaN	20.2312
	-5.04707	1.66651	NaN	NaN	NaN	NaN	NaN	NaN	NaN	8.79887	17.1126	NaN	NaN	NaN	NaN	-6.7902	NaN	NaN	NaN	NaN	NaN	NaN	NaN	3.97273	0.825281	NaN	17.3611
	-5.53666	2.45929	NaN	NaN	NaN	NaN	NaN	NaN	NaN	10.6477	17.1722	NaN	NaN	NaN	NaN	-2.50555	NaN	NaN	NaN	NaN	NaN	NaN	NaN	4.97685	2.44265	NaN	16.543
	-5.94978	1.74172	NaN	NaN	NaN	NaN	NaN	NaN	NaN	11.3302	16.6575	NaN	NaN	NaN	NaN	-5.92709	NaN	NaN	NaN	NaN	NaN	NaN	NaN	4.56533	1.81306	NaN	11.7457
	-5.3298	3.63606	NaN	NaN	NaN	NaN	NaN	NaN	NaN	11.7099	16.5082	NaN	NaN	NaN	NaN	-4.77651	NaN	NaN	NaN	NaN	NaN	NaN	NaN	7.0884	3.68299	NaN	11.3
	-5.22427	1.36933	NaN	NaN	NaN	NaN	NaN	NaN	NaN	8.28696	17.2338	NaN	NaN	NaN	NaN	-5.42581	NaN	NaN	NaN	NaN	NaN	NaN	NaN	7.01842	1.84927	NaN	7.22218
	-4.72993	3.87863	NaN	NaN	NaN	NaN	NaN	NaN	NaN	6.99921	15.3945	NaN	NaN	NaN	NaN	-5.13539	NaN	NaN	NaN	NaN	NaN	NaN	NaN	6.81099	1.63397	NaN	9.11131
	-4.99641	0.40804	NaN	NaN	NaN	NaN	NaN	NaN	NaN	3.3275	16.9148	NaN	NaN	NaN	NaN	-6.23572	NaN	NaN	NaN	NaN	NaN	NaN	NaN	5.46504	2.12786	NaN	8.76843
	-3.27067	0.445696	NaN	NaN	NaN	NaN	NaN	NaN	NaN	3.38817	-7.00535	NaN	NaN	NaN	NaN	-2.03804	NaN	NaN	NaN	NaN	NaN	NaN	NaN	5.29335	2.74803	NaN	12.0825
	-3.68058	-1.33946	NaN	NaN	NaN	NaN	NaN	NaN	NaN	0.94558	16.871	NaN	NaN	NaN	NaN	-1.93224	NaN	NaN	NaN	NaN	NaN	NaN	NaN	3.00805	2.76613	NaN	12.7634
	-2.89071	-0.141241	NaN	NaN	NaN	NaN	NaN	NaN	NaN	0.988721	16.3142	NaN	NaN	NaN	NaN	2.47443	NaN	NaN	NaN	NaN	NaN	NaN	NaN	3.22903	1.74162	NaN	14.5607
	-3.55516	-0.696645	NaN	NaN	NaN	NaN	NaN	NaN	NaN	-0.195743	-12.1441	NaN	NaN	NaN	NaN	1.31055	NaN	NaN	NaN	NaN	NaN	NaN	NaN	0.414438	-12.6715	NaN	11.0378
	-2.90931	-1.19698	NaN	NaN	NaN	NaN	NaN	NaN	NaN	0.067868	-10.8205	NaN	NaN	NaN	NaN	4.69353	NaN	NaN	NaN	NaN	NaN	NaN	NaN	1.51686	2.43794	NaN	13.2969
	-1.42364	-1.18828	NaN	NaN	NaN	NaN	NaN	NaN	NaN	-2.69175	-12.4823	NaN	NaN	NaN	NaN	3.01629	NaN	NaN	NaN	NaN	NaN	NaN	NaN	-2.19535	6.49033	NaN	12.3303
	-0.367891	-0.790874	NaN	NaN	NaN	NaN	NaN	NaN	NaN	-2.35472	-12.1224	NaN	NaN	NaN	NaN	6.8196	NaN	NaN	NaN	NaN	NaN	NaN	NaN	-1.00295	6.88649	NaN	13.0913
	0.0171863	-2.38852	NaN	NaN	NaN	NaN	NaN	NaN	NaN	-5.40444	-13.708	NaN	NaN	NaN	NaN	6.85947	NaN	NaN	NaN	NaN	NaN	NaN	NaN	-3.77337	5.6938	NaN	9.75139
	2.07159	-6.13464	NaN	NaN	NaN	NaN	NaN	NaN	NaN	-6.0215	-12.8792	NaN	NaN	NaN	NaN	7.85948	NaN	NaN	NaN	NaN	NaN	NaN	NaN	-4.64352	8.65157	NaN	10.7702
	2.29486	-2.34155	NaN	NaN	NaN	NaN	NaN	NaN	NaN	-9.43251	-11.6514	NaN	NaN	NaN	NaN	7.34632	NaN	NaN	NaN	NaN	NaN	NaN	NaN	-6.62616	9.04865	NaN	11.0491
	3.16905	-1.79305	NaN	NaN	NaN	NaN	NaN	NaN	NaN	-10.2936	-12.3024	NaN	NaN	NaN	NaN	8.49251	NaN	NaN	NaN	NaN	NaN	NaN	NaN	-6.63769	6.68841	NaN	13.4814
	2.10526	-3.23593	NaN	NaN	NaN	NaN	NaN	NaN	NaN	-11.5282	-12.9152	NaN	NaN	NaN	NaN	5.369	NaN	NaN	NaN	NaN	NaN	NaN	NaN	-7.66246	-8.2708	NaN	12.2122
	1.64717	-2.33006	NaN	NaN	NaN	NaN	NaN	NaN	NaN	-9.98284	12.4226	NaN	NaN	NaN	NaN	8.13279	NaN	NaN	NaN	NaN	NaN	NaN	NaN	-6.50981	-6.5833	NaN	12.9348
	1.69489	-2.82078	NaN	NaN	NaN	NaN	NaN	NaN	NaN	-9.67597	8.68006	NaN	NaN	NaN	NaN	5.24621	NaN	NaN	NaN	NaN	NaN	NaN	NaN	-6.33711	-8.5456	NaN	11.9724
	2.15288	-3.22621	NaN	NaN	NaN	NaN	NaN	NaN	NaN	-8.96207	-11.9769	NaN	NaN	NaN	NaN	5.44852	NaN	NaN	NaN	NaN	NaN	NaN	NaN	-2.56812	-7.1159	NaN	12.4942
	1.69445	-6.50281	NaN	NaN	NaN	NaN	NaN	NaN	NaN	-8.97002	-12.6088	NaN	NaN	NaN	NaN	4.18003	NaN	NaN	NaN	NaN	NaN	NaN	NaN	-4.13603	-7.31764	NaN	12.4876
	5.1775	-2.78299	NaN	NaN	NaN	NaN	NaN	NaN	NaN	-7.79623	-0.246324	NaN	NaN	NaN	NaN	4.54218	NaN	NaN	NaN	NaN	NaN	NaN	NaN	-3.81235	-7.90864	NaN	11.8898
	5.04801	-2.57542	NaN	NaN	NaN	NaN	NaN	NaN	NaN	-7.89961	10.5513	NaN	NaN	NaN	NaN	2.66305	NaN	NaN	NaN	NaN	NaN	NaN	NaN	-4.03184	-10.7802	NaN	10.6107
	7.86316	-4.99875	NaN	NaN	NaN	NaN	NaN	NaN	NaN	-7.83136	-1.64841	NaN	NaN	NaN	NaN	3.79067	NaN	NaN	NaN	NaN	NaN	NaN	NaN	-3.31969	-8.56211	NaN	10.4063
	7.33683	-6.55461	NaN	NaN	NaN	NaN	NaN	NaN	NaN	-7.28905	-12.2928	NaN	NaN	NaN	NaN	4.94175	NaN	NaN	NaN	NaN	NaN	NaN	NaN	-3.21905	-9.09578	NaN	10.7141
	6.0111	-9.41846	NaN	NaN	NaN	NaN	NaN	NaN	NaN	-6.88839	-6.42755	NaN	NaN	NaN	NaN	6.48608	NaN	NaN	NaN	NaN	NaN	NaN	NaN	-5.24748	-7.61314	NaN	12.2398
	5.86356	-10.1701	NaN	NaN	NaN	NaN	NaN	NaN	NaN	-6.86445	5.15249	NaN	NaN	NaN	NaN	5.44601	NaN	NaN	NaN	NaN	NaN	NaN	NaN	-6.70727	6.48494	NaN	11.2678
	6.56728	-7.93601	NaN	NaN	NaN	NaN	NaN	NaN	NaN	-4.19844	15.2016	NaN	NaN	NaN	NaN	6.07476	NaN	NaN	NaN	NaN	NaN	NaN	NaN	-6.05273	6.38898	NaN	10.9159
	6.15257	-5.91101	NaN	NaN	NaN	NaN	NaN	NaN	NaN	-3.46279	15.5097	NaN	NaN	NaN	NaN	3.7081	NaN	NaN	NaN	NaN	NaN	NaN	NaN	-7.04942	4.47057	NaN	9.65789
	8.52064	-6.17494	NaN	NaN	NaN	NaN	NaN	NaN	NaN	-0.213372	-9.36019	NaN	NaN	NaN	NaN	4.18683	NaN	NaN	NaN	NaN	NaN	NaN	NaN	-6.34859	4.27068	NaN	8.65772
	9.14657	-7.13231	NaN	NaN	NaN	NaN	NaN	NaN	NaN	-0.302994	-8.36394	NaN	NaN	NaN	NaN	0.136344	NaN	NaN	NaN	NaN	NaN	NaN	NaN	-7.84133	4.32158	NaN	8.4818
	10.5848	-8.51604	NaN	NaN	NaN	NaN	NaN	NaN	NaN	1.29848	-6.84851	NaN	NaN	NaN	NaN	0.0289028	NaN	NaN	NaN	NaN	NaN	NaN	NaN	-8.00793	3.21681	NaN	10.0084
	10.8915	-6.93018	NaN	NaN	NaN	NaN	NaN	NaN	NaN	1.22227	-6.55896	NaN	NaN	NaN	NaN	-2.64596	NaN	NaN	NaN	NaN	NaN	NaN	NaN	-8.05107	2.60352	NaN	8.72309
	14.4847	-6.44867	NaN	NaN	NaN	NaN	NaN	NaN	NaN	2.85418	-4.13514	NaN	NaN	NaN	NaN	-2.15084	NaN	NaN	NaN	NaN	NaN	NaN	NaN	-8.03121	2.00564	NaN	11.0365
	14.4465	-8.3916	NaN	NaN	NaN	NaN	NaN	NaN	NaN	2.34709	-5.2353	NaN	NaN	NaN	NaN	-3.76317	NaN	NaN	NaN	NaN	NaN	NaN	NaN	-8.66211	0.933311	NaN	9.17609
	14.5427	-8.70668	NaN	NaN	NaN	NaN	NaN	NaN	NaN	3.74471	-4.6707	NaN	NaN	NaN	NaN	-2.80551	NaN	NaN	NaN	NaN	NaN	NaN	NaN	-7.77821	0.562428	NaN	10.315
	14.2216	-8.8919	NaN	NaN	NaN	NaN	NaN	NaN	NaN	2.05043	-5.57214	NaN	NaN	NaN	NaN	-5.0618	NaN	NaN	NaN	NaN	NaN	NaN	NaN	-6.9551	-0.11603	NaN	7.61769
	15.8224	-6.47154	NaN	NaN	NaN	NaN	NaN	NaN	NaN	2.30814	-5.41405	NaN	NaN	NaN	NaN	-2.90162	NaN	NaN	NaN	NaN	NaN	NaN	NaN	-5.04195	2.30458	NaN	6.9927
	15.3298	-7.96609	NaN	NaN	NaN	NaN	NaN	NaN	NaN	0.42907	-6.12335	NaN	NaN	NaN	NaN	-3.67467	NaN	NaN	NaN	NaN	NaN	NaN	NaN	-5.83418	1.46948	NaN	5.4923
	16.5779	-8.31432	NaN	NaN	NaN	NaN	NaN	NaN	NaN	0.998703	-6.30761	NaN	NaN	NaN	NaN	-3.62403	NaN	NaN	NaN	NaN	NaN	NaN	NaN	-4.83053	2.0121	NaN	4.30529
	15.1567	-6.99884	NaN	NaN	NaN	NaN	NaN	NaN	NaN	-0.82642	-5.12142	NaN	NaN	NaN	NaN	-4.53375	NaN	NaN	NaN	NaN	NaN	NaN	NaN	-4.48785	2.53333	NaN	1.80581
	16.3898	-3.11563	NaN	NaN	NaN	NaN	NaN	NaN	NaN	-1.50177	-5.4931	NaN	NaN	NaN	NaN	-2.02851	NaN	NaN	NaN	NaN	NaN	NaN	NaN	-4.60727	1.09428	NaN	2.65981
	14.5041	-6.22328	NaN	NaN	NaN	NaN	NaN	NaN	NaN	-1.90317	-7.69192	NaN	NaN	NaN	NaN	-1.91047	NaN	NaN	NaN	NaN	NaN	NaN	NaN	-4.38166	1.88703	NaN	1.51251
	14.8291	-3.77153	NaN	NaN	NaN	NaN	NaN	NaN	NaN	-2.16715	-7.42955	NaN	NaN	NaN	NaN	2.33702	NaN	NaN	NaN	NaN	NaN	NaN	NaN	-4.30693	1.74079	NaN	2.19129
	12.6369	-5.35803	NaN	NaN	NaN	NaN	NaN	NaN	NaN	-2.57272	-7.03852	NaN	NaN	NaN	NaN	1.42158	NaN	NaN	NaN	NaN	NaN	NaN	NaN	-2.4676	-4.1656	NaN	-1.8305
	11.6099	-3.45589	NaN	NaN	NaN	NaN	NaN	NaN	NaN	-2.15228	-6.72861	NaN	NaN	NaN	NaN	2.60897	NaN	NaN	NaN	NaN	NaN	NaN	NaN	-2.11915	1.8138	NaN	0.210276
	8.5908	-3.67389	NaN	NaN	NaN	NaN	NaN	NaN	NaN	-2.03457	-6.59251	NaN	NaN	NaN	NaN	1.01607	NaN	NaN	NaN	NaN	NaN	NaN	NaN	-1.04803	-0.499446	NaN	-3.9462
	8.45412	-1.33521	NaN	NaN	NaN	NaN	NaN	NaN	NaN	-1.04998	-7.56074	NaN	NaN	NaN	NaN	1.13236	NaN	NaN	NaN	NaN	NaN	NaN	NaN	-0.628706	1.81391	NaN	-2.924
	5.30827	-1.65705	NaN	NaN	NaN	NaN	NaN	NaN	NaN	0.395666	-7.23403	NaN	NaN	NaN	NaN	0.267824	NaN	NaN	NaN	NaN	NaN	NaN	NaN	-0.297004	5.88391	NaN	-5.10706
	5.22875	1.44424	NaN	NaN	NaN	NaN	NaN	NaN	NaN	1.80657	-6.88356	NaN	NaN	NaN	NaN	1.27495	NaN	NaN	NaN	NaN	NaN	NaN	NaN	-0.640459	-1.1759	NaN	-2.88825
	4.81145	1.20026	NaN	NaN	NaN	NaN	NaN	NaN	NaN	0.642026	-6.66056	NaN	NaN	NaN	NaN	0.766753	NaN	NaN	NaN	NaN	NaN	NaN	NaN	-0.340166	14.906	NaN	-4.37294
	5.5518	3.51902	NaN	NaN	NaN	NaN	NaN	NaN	NaN	0.589047	-7.07662	NaN	NaN	NaN	NaN	0.304023	NaN	NaN	NaN	NaN	NaN	NaN	NaN	-0.765606	0.657231	NaN	-0.606274
	4.31319	3.05506	NaN	NaN	NaN	NaN	NaN	NaN	NaN	-1.53646	-12.7195	NaN	NaN	NaN	NaN	0.235532	NaN	NaN	NaN	NaN	NaN	NaN	NaN	-0.683862	25.0139	NaN	-1.40571
	4.27718	4.84449	NaN	NaN	NaN	NaN	NaN	NaN	NaN	-1.90166	-11.6141	NaN	NaN	NaN	NaN	2.38159	NaN	NaN	NaN	NaN	NaN	NaN	NaN	0.125458	25.2415	NaN	2.95789
	4.07438	5.14723	NaN	NaN	NaN	NaN	NaN	NaN	NaN	-2.85827	-10.3309	NaN	NaN	NaN	NaN	2.32861	NaN	NaN	NaN	NaN	NaN	NaN	NaN	1.89174	24.638	NaN	1.1511
	0.466013	2.62419	NaN	NaN	NaN	NaN	NaN	NaN	NaN	-3.71984	-10.4314	NaN	NaN	NaN	NaN	2.56183	NaN	NaN	NaN	NaN	NaN	NaN	NaN	3.20665	23.7528	NaN	3.40276
	-0.487536	0.988092	NaN	NaN	NaN	NaN	NaN	NaN	NaN	-4.32486	-9.89804	NaN	NaN	NaN	NaN	0.233284	NaN	NaN	NaN	NaN	NaN	NaN	NaN	3.03977	12.8356	NaN	1.46337
	0.382969	1.9146	NaN	NaN	NaN	NaN	NaN	NaN	NaN	-3.77923	11.8452	NaN	NaN	NaN	NaN	1.09619	NaN	NaN	NaN	NaN	NaN	NaN	NaN	4.26089	17.5422	NaN	6.00036
	0.822509	-0.391631	NaN	NaN	NaN	NaN	NaN	NaN	NaN	-4.70127	-10.9725	NaN	NaN	NaN	NaN	-1.23567	NaN	NaN	NaN	NaN	NaN	NaN	NaN	3.19058	24.9398	NaN	1.93538
	3.08826	0.690928	NaN	NaN	NaN	NaN	NaN	NaN	NaN	-4.49901	-12.1348	NaN	NaN	NaN	NaN	-0.736037	NaN	NaN	NaN	NaN	NaN	NaN	NaN	2.83659	14.381	NaN	5.94692
	3.4571	-2.91168	NaN	NaN	NaN	NaN	NaN	NaN	NaN	-4.68634	-10.1647	NaN	NaN	NaN	NaN	-0.948827	NaN	NaN	NaN	NaN	NaN	NaN	NaN	2.40069	10.3876	NaN	3.88595
	5.31343	-1.20244	NaN	NaN	NaN	NaN	NaN	NaN	NaN	-3.72254	0.973574	NaN	NaN	NaN	NaN	0.355859	NaN	NaN	NaN	NaN	NaN	NaN	NaN	1.95555	13.2692	NaN	8.69172
	3.7683	-2.54511	NaN	NaN	NaN	NaN	NaN	NaN	NaN	-5.88613	-12.4136	NaN	NaN	NaN	NaN	0.991868	NaN	NaN	NaN	NaN	NaN	NaN	NaN	-1.23841	9.97798	NaN	10.5881
	7.4127	-2.66597	NaN	NaN	NaN	NaN	NaN	NaN	NaN	-5.57068	-11.6132	NaN	NaN	NaN	NaN	3.88609	NaN	NaN	NaN	NaN	NaN	NaN	NaN	-2.0249	9.70395	NaN	11.6076
	5.69634	-3.43643	NaN	NaN	NaN	NaN	NaN	NaN	NaN	-7.03072	-12.2341	NaN	NaN	NaN	NaN	2.75082	NaN	NaN	NaN	NaN	NaN	NaN	NaN	-2.33998	5.61558	NaN	10.4629
	9.02508	-2.05706	NaN	NaN	NaN	NaN	NaN	NaN	NaN	-5.87881	-11.9494	NaN	NaN	NaN	NaN	5.78082	NaN	NaN	NaN	NaN	NaN	NaN	NaN	-1.83163	5.87111	NaN	9.87919
	9.43232	-20.6124	NaN	NaN	NaN	NaN	NaN	NaN	NaN	-8.20925	-12.355	NaN	NaN	NaN	NaN	3.62555	NaN	NaN	NaN	NaN	NaN	NaN	NaN	-2.28621	1.44609	NaN	6.60847
	13.3065	-2.60554	NaN	NaN	NaN	NaN	NaN	NaN	NaN	-6.82411	-11.9033	NaN	NaN	NaN	NaN	4.40661	NaN	NaN	NaN	NaN	NaN	NaN	NaN	-2.40727	1.72419	NaN	6.21179
	14.1806	-17.3253	NaN	NaN	NaN	NaN	NaN	NaN	NaN	-7.38329	-12.0256	NaN	NaN	NaN	NaN	7.52924	NaN	NaN	NaN	NaN	NaN	NaN	NaN	-2.9174	0.811292	NaN	3.08145
	15.7386	-14.0927	NaN	NaN	NaN	NaN	NaN	NaN	NaN	-5.79502	-12.0917	NaN	NaN	NaN	NaN	10.1011	NaN	NaN	NaN	NaN	NaN	NaN	NaN	-2.39817	3.71598	NaN	3.31209
	18.6373	-14.1958	NaN	NaN	NaN	NaN	NaN	NaN	NaN	-7.39512	-5.10414	NaN	NaN	NaN	NaN	11.1061	NaN	NaN	NaN	NaN	NaN	NaN	NaN	-3.04282	2.27967	NaN	3.36282
	23.5706	-11.609	NaN	NaN	NaN	NaN	NaN	NaN	NaN	-4.2484	-3.27834	NaN	NaN	NaN	NaN	13.7356	NaN	NaN	NaN	NaN	NaN	NaN	NaN	-2.40071	5.28326	NaN	7.11922
	20.6041	-6.78923	NaN	NaN	NaN	NaN	NaN	NaN	NaN	-3.84666	-2.69516	NaN	NaN	NaN	NaN	12.6628	NaN	NaN	NaN	NaN	NaN	NaN	NaN	-1.59877	5.50826	NaN	8.86875
	25.1124	-3.04624	NaN	NaN	NaN	NaN	NaN	NaN	NaN	-6.58915	1.21198	NaN	NaN	NaN	NaN	15.9675	NaN	NaN	NaN	NaN	NaN	NaN	NaN	-0.37027	8.04776	NaN	3.19677
	25.0447	0.677522	NaN	NaN	NaN	NaN	NaN	NaN	NaN	5.50568	1.76501	NaN	NaN	NaN	NaN	15.8304	NaN	NaN	NaN	NaN	NaN	NaN	NaN	0.9366	7.50505	NaN	14.1075
	21.104	-12.9024	NaN	NaN	NaN	NaN	NaN	NaN	NaN	7.82953	5.07367	NaN	NaN	NaN	NaN	16.4431	NaN	NaN	NaN	NaN	NaN	NaN	NaN	4.32003	8.57342	NaN	16.4371
	34.2913	9.23636	NaN	NaN	NaN	NaN	NaN	NaN	NaN	10.4466	5.04164	NaN	NaN	NaN	NaN	15.6316	NaN	NaN	NaN	NaN	NaN	NaN	NaN	5.21145	8.44849	NaN	16.5045
	36.6317	-4.91774	NaN	NaN	NaN	NaN	NaN	NaN	NaN	-5.21791	6.58439	NaN	NaN	NaN	NaN	17.6155	NaN	NaN	NaN	NaN	NaN	NaN	NaN	7.73187	12.0634	NaN	18.5723
	38.7876	15.6122	NaN	NaN	NaN	NaN	NaN	NaN	NaN	17.697	6.15482	NaN	NaN	NaN	NaN	17.1041	NaN	NaN	NaN	NaN	NaN	NaN	NaN	7.71835	11.6461	NaN	19.5023
	23.0743	19.5814	NaN	NaN	NaN	NaN	NaN	NaN	NaN	20.5029	8.54366	NaN	NaN	NaN	NaN	20.7531	NaN	NaN	NaN	NaN	NaN	NaN	NaN	8.24075	13.7595	NaN	24.0375
	46.5456	23.2182	NaN	NaN	NaN	NaN	NaN	NaN	NaN	19.8835	7.75663	NaN	NaN	NaN	NaN	20.5584	NaN	NaN	NaN	NaN	NaN	NaN	NaN	9.01836	13.177	NaN	24.6826
	51.089	23.9061	NaN	NaN	NaN	NaN	NaN	NaN	NaN	2.61434	10.0455	NaN	NaN	NaN	NaN	23.2233	NaN	NaN	NaN	NaN	NaN	NaN	NaN	10.6524	14.3659	NaN	28.3815
	50.1614	24.4746	NaN	NaN	NaN	NaN	NaN	NaN	NaN	26.9864	8.65181	NaN	NaN	NaN	NaN	20.8223	NaN	NaN	NaN	NaN	NaN	NaN	NaN	13.4539	12.1791	NaN	28.3829
	49.5532	24.3978	NaN	NaN	NaN	NaN	NaN	NaN	NaN	30.605	8.80863	NaN	NaN	NaN	NaN	21.5361	NaN	NaN	NaN	NaN	NaN	NaN	NaN	13.9094	13.5017	NaN	30.688
	47.6355	25.1548	NaN	NaN	NaN	NaN	NaN	NaN	NaN	35.2739	7.97234	NaN	NaN	NaN	NaN	21.211	NaN	NaN	NaN	NaN	NaN	NaN	NaN	15.5599	12.679	NaN	30.1679
	44.9251	25.3295	NaN	NaN	NaN	NaN	NaN	NaN	NaN	39.0049	4.31608	NaN	NaN	NaN	NaN	20.2906	NaN	NaN	NaN	NaN	NaN	NaN	NaN	16.8977	10.684	NaN	26.5985
	43.0004	24.1468	NaN	NaN	NaN	NaN	NaN	NaN	NaN	39.6609	2.3308	NaN	NaN	NaN	NaN	18.4722	NaN	NaN	NaN	NaN	NaN	NaN	NaN	17.1648	10.1067	NaN	24.6082
	42.7998	24.0381	NaN	NaN	NaN	NaN	NaN	NaN	NaN	44.2431	3.43912	NaN	NaN	NaN	NaN	21.2202	NaN	NaN	NaN	NaN	NaN	NaN	NaN	16.9236	10.9149	NaN	25.1097
	41.8397	23.4089	NaN	NaN	NaN	NaN	NaN	NaN	NaN	40.0135	2.83864	NaN	NaN	NaN	NaN	21.7689	NaN	NaN	NaN	NaN	NaN	NaN	NaN	17.2584	10.416	NaN	23.3211
	43.553	23.8075	NaN	NaN	NaN	NaN	NaN	NaN	NaN	42.7081	5.4253	NaN	NaN	NaN	NaN	25.7119	NaN	NaN	NaN	NaN	NaN	NaN	NaN	17.4066	13.5759	NaN	23.4952
	41.6593	24.6938	NaN	NaN	NaN	NaN	NaN	NaN	NaN	43.2056	3.83398	NaN	NaN	NaN	NaN	27.6361	NaN	NaN	NaN	NaN	NaN	NaN	NaN	16.4709	12.8878	NaN	22.4518
	43.7804	26.5695	NaN	NaN	NaN	NaN	NaN	NaN	NaN	45.6831	3.93941	NaN	NaN	NaN	NaN	30.2055	NaN	NaN	NaN	NaN	NaN	NaN	NaN	16.8716	16.0341	NaN	24.4175
	43.3581	27.9743	NaN	NaN	NaN	NaN	NaN	NaN	NaN	46.5645	1.3269	NaN	NaN	NaN	NaN	28.2928	NaN	NaN	NaN	NaN	NaN	NaN	NaN	15.0178	13.8149	NaN	20.6307
	46.1727	31.6563	NaN	NaN	NaN	NaN	NaN	NaN	NaN	47.3469	0.632087	NaN	NaN	NaN	NaN	30.1404	NaN	NaN	NaN	NaN	NaN	NaN	NaN	14.7762	16.8525	NaN	20.9299
	46.2464	31.9323	NaN	NaN	NaN	NaN	NaN	NaN	NaN	45.2331	0.529331	NaN	NaN	NaN	NaN	26.3934	NaN	NaN	NaN	NaN	NaN	NaN	NaN	11.3817	13.2318	NaN	20.6649
	49.8937	33.8361	NaN	NaN	NaN	NaN	NaN	NaN	NaN	45.5222	0.726172	NaN	NaN	NaN	NaN	28.9429	NaN	NaN	NaN	NaN	NaN	NaN	NaN	12.376	34.1947	NaN	20.9778
	51.8698	35.1709	NaN	NaN	NaN	NaN	NaN	NaN	NaN	46.1238	0.844011	NaN	NaN	NaN	NaN	26.0116	NaN	NaN	NaN	NaN	NaN	NaN	NaN	10.066	33.5487	NaN	20.2918
	54.1851	38.0856	NaN	NaN	NaN	NaN	NaN	NaN	NaN	38.0695	1.82161	NaN	NaN	NaN	NaN	28.7566	NaN	NaN	NaN	NaN	NaN	NaN	NaN	10.4911	36.0761	NaN	21.6635
	53.9942	37.532	NaN	NaN	NaN	NaN	NaN	NaN	NaN	46.29	1.90445	NaN	NaN	NaN	NaN	26.3389	NaN	NaN	NaN	NaN	NaN	NaN	NaN	9.68876	33.852	NaN	22.2872
	57.2951	41.2	NaN	NaN	NaN	NaN	NaN	NaN	NaN	29.9486	4.97954	NaN	NaN	NaN	NaN	27.6681	NaN	NaN	NaN	NaN	NaN	NaN	NaN	10.036	37.0447	NaN	24.5703
	56.6631	42.4345	NaN	NaN	NaN	NaN	NaN	NaN	NaN	25.0049	4.28729	NaN	NaN	NaN	NaN	27.4772	NaN	NaN	NaN	NaN	NaN	NaN	NaN	9.07599	35.1513	NaN	25.0662
	58.7995	45.1659	NaN	NaN	NaN	NaN	NaN	NaN	NaN	24.7673	8.68875	NaN	NaN	NaN	NaN	29.5141	NaN	NaN	NaN	NaN	NaN	NaN	NaN	11.5144	34.9764	NaN	29.1066
	58.4478	46.4646	NaN	NaN	NaN	NaN	NaN	NaN	NaN	25.3475	8.19348	NaN	NaN	NaN	NaN	26.0277	NaN	NaN	NaN	NaN	NaN	NaN	NaN	12.9145	30.347	NaN	30.1982
	59.0859	39.366	NaN	NaN	NaN	NaN	NaN	NaN	NaN	26.258	9.52977	NaN	NaN	NaN	NaN	27.603	NaN	NaN	NaN	NaN	NaN	NaN	NaN	14.3058	29.4293	NaN	31.8762
	58.8462	52.8684	NaN	NaN	NaN	NaN	NaN	NaN	NaN	26.6637	9.56605	NaN	NaN	NaN	NaN	26.7451	NaN	NaN	NaN	NaN	NaN	NaN	NaN	13.8236	36.098	NaN	31.5636
	60.1977	57.2943	NaN	NaN	NaN	NaN	NaN	NaN	NaN	29.3047	12.5913	NaN	NaN	NaN	NaN	27.1142	NaN	NaN	NaN	NaN	NaN	NaN	NaN	15.5289	23.904	NaN	35.1784
	58.646	58.1296	NaN	NaN	NaN	NaN	NaN	NaN	NaN	30.629	13.058	NaN	NaN	NaN	NaN	28.7106	NaN	NaN	NaN	NaN	NaN	NaN	NaN	14.986	32.6617	NaN	34.3847
	60.8618	60.9624	NaN	NaN	NaN	NaN	NaN	NaN	NaN	32.6513	14.9748	NaN	NaN	NaN	NaN	28.3463	NaN	NaN	NaN	NaN	NaN	NaN	NaN	14.8903	11.6201	NaN	36.6797
	59.1639	59.9479	NaN	NaN	NaN	NaN	NaN	NaN	NaN	32.1671	13.056	NaN	NaN	NaN	NaN	28.9866	NaN	NaN	NaN	NaN	NaN	NaN	NaN	12.4421	8.2544	NaN	36.519
	58.7985	63.3726	NaN	NaN	NaN	NaN	NaN	NaN	NaN	35.5025	13.378	NaN	NaN	NaN	NaN	26.9296	NaN	NaN	NaN	NaN	NaN	NaN	NaN	11.6918	7.15473	NaN	38.4281
	54.5656	63.1004	NaN	NaN	NaN	NaN	NaN	NaN	NaN	36.3524	10.7422	NaN	NaN	NaN	NaN	32.491	NaN	NaN	NaN	NaN	NaN	NaN	NaN	8.54902	5.55634	NaN	36.7166
	53.198	63.2592	NaN	NaN	NaN	NaN	NaN	NaN	NaN	39.3833	9.86495	NaN	NaN	NaN	NaN	36.3449	NaN	NaN	NaN	NaN	NaN	NaN	NaN	8.49244	4.83565	NaN	38.3448
	60.0128	60.9842	NaN	NaN	NaN	NaN	NaN	NaN	NaN	42.6533	8.11631	NaN	NaN	NaN	NaN	33.8369	NaN	NaN	NaN	NaN	NaN	NaN	NaN	7.08275	3.61885	NaN	34.6073
	46.8329	60.0156	NaN	NaN	NaN	NaN	NaN	NaN	NaN	45.1775	7.13561	NaN	NaN	NaN	NaN	35.2261	NaN	NaN	NaN	NaN	NaN	NaN	NaN	6.4906	2.72921	NaN	34.3979
	46.9175	57.3925	NaN	NaN	NaN	NaN	NaN	NaN	NaN	45.5663	4.3992	NaN	NaN	NaN	NaN	36.0222	NaN	NaN	NaN	NaN	NaN	NaN	NaN	5.96888	3.17225	NaN	34.0413
	44.6718	54.7958	NaN	NaN	NaN	NaN	NaN	NaN	NaN	47.316	3.50925	NaN	NaN	NaN	NaN	32.8494	NaN	NaN	NaN	NaN	NaN	NaN	NaN	3.91599	5.196	NaN	32.4545
	42.8337	51.8509	NaN	NaN	NaN	NaN	NaN	NaN	NaN	46.1197	3.05218	NaN	NaN	NaN	NaN	30.4626	NaN	NaN	NaN	NaN	NaN	NaN	NaN	3.72399	5.65937	NaN	30.6253
	43.0993	52.8598	NaN	NaN	NaN	NaN	NaN	NaN	NaN	45.9528	3.93837	NaN	NaN	NaN	NaN	31.8224	NaN	NaN	NaN	NaN	NaN	NaN	NaN	3.74574	8.58693	NaN	33.0651
	42.7225	49.466	NaN	NaN	NaN	NaN	NaN	NaN	NaN	41.3643	2.63993	NaN	NaN	NaN	NaN	29.9376	NaN	NaN	NaN	NaN	NaN	NaN	NaN	3.24904	8.54802	NaN	31.5212
	44.0694	49.224	NaN	NaN	NaN	NaN	NaN	NaN	NaN	43.3128	2.89899	NaN	NaN	NaN	NaN	33.1189	NaN	NaN	NaN	NaN	NaN	NaN	NaN	3.29915	11.5038	NaN	33.26
	44.2166	47.5091	NaN	NaN	NaN	NaN	NaN	NaN	NaN	43.7075	2.11557	NaN	NaN	NaN	NaN	28.5166	NaN	NaN	NaN	NaN	NaN	NaN	NaN	3.48882	9.55203	NaN	33.469
	44.9929	47.9919	NaN	NaN	NaN	NaN	NaN	NaN	NaN	45.077	1.98996	NaN	NaN	NaN	NaN	28.051	NaN	NaN	NaN	NaN	NaN	NaN	NaN	6.1188	11.9538	NaN	34.7939
	43.9704	46.8373	NaN	NaN	NaN	NaN	NaN	NaN	NaN	43.7918	1.13051	NaN	NaN	NaN	NaN	25.0655	NaN	NaN	NaN	NaN	NaN	NaN	NaN	6.10288	8.97254	NaN	34.2774
	45.0336	47.8433	NaN	NaN	NaN	NaN	NaN	NaN	NaN	44.7482	1.83562	NaN	NaN	NaN	NaN	24.5659	NaN	NaN	NaN	NaN	NaN	NaN	NaN	9.0898	12.9809	NaN	33.8455
	44.4934	47.1836	NaN	NaN	NaN	NaN	NaN	NaN	NaN	43.2369	1.26465	NaN	NaN	NaN	NaN	23.6587	NaN	NaN	NaN	NaN	NaN	NaN	NaN	7.5693	8.3062	NaN	35.2976
	46.2193	48.2781	NaN	NaN	NaN	NaN	NaN	NaN	NaN	44.9996	2.16417	NaN	NaN	NaN	NaN	25.7555	NaN	NaN	NaN	NaN	NaN	NaN	NaN	7.63734	10.4853	NaN	34.1314
	44.5584	48.4784	NaN	NaN	NaN	NaN	NaN	NaN	NaN	45.1833	2.69111	NaN	NaN	NaN	NaN	24.3859	NaN	NaN	NaN	NaN	NaN	NaN	NaN	5.846	7.97059	NaN	41.3961
	46.1991	50.7811	NaN	NaN	NaN	NaN	NaN	NaN	NaN	46.3104	3.39109	NaN	NaN	NaN	NaN	26.8238	NaN	NaN	NaN	NaN	NaN	NaN	NaN	4.19906	9.1324	NaN	34.0614
	46.2045	51.498	NaN	NaN	NaN	NaN	NaN	NaN	NaN	47.6221	3.69944	NaN	NaN	NaN	NaN	25.6969	NaN	NaN	NaN	NaN	NaN	NaN	NaN	2.49932	9.93461	NaN	49.4804
	47.3325	56.1523	NaN	NaN	NaN	NaN	NaN	NaN	NaN	48.4846	4.77574	NaN	NaN	NaN	NaN	28.9155	NaN	NaN	NaN	NaN	NaN	NaN	NaN	2.3267	12.4037	NaN	53.6849
	47.4681	57.2778	NaN	NaN	NaN	NaN	NaN	NaN	NaN	47.2346	6.21314	NaN	NaN	NaN	NaN	27.7291	NaN	NaN	NaN	NaN	NaN	NaN	NaN	1.77608	11.1303	NaN	52.4391
	49.1162	59.8729	NaN	NaN	NaN	NaN	NaN	NaN	NaN	49.353	8.27626	NaN	NaN	NaN	NaN	28.7166	NaN	NaN	NaN	NaN	NaN	NaN	NaN	3.59284	11.8033	NaN	55.3092
	50.9904	59.9877	NaN	NaN	NaN	NaN	NaN	NaN	NaN	48.8119	10.5353	NaN	NaN	NaN	NaN	27.7657	NaN	NaN	NaN	NaN	NaN	NaN	NaN	2.9276	9.6611	NaN	53.808
	54.0639	63.904	NaN	NaN	NaN	NaN	NaN	NaN	NaN	50.7454	11.4698	NaN	NaN	NaN	NaN	28.4625	NaN	NaN	NaN	NaN	NaN	NaN	NaN	4.9976	10.9853	NaN	55.5891
	55.3057	63.6984	NaN	NaN	NaN	NaN	NaN	NaN	NaN	49.8189	11.7611	NaN	NaN	NaN	NaN	28.955	NaN	NaN	NaN	NaN	NaN	NaN	NaN	5.13923	10.4451	NaN	54.5852
	57.0774	65.4336	NaN	NaN	NaN	NaN	NaN	NaN	NaN	50.3036	11.9124	NaN	NaN	NaN	NaN	31.4373	NaN	NaN	NaN	NaN	NaN	NaN	NaN	7.84494	9.87026	NaN	54.6269
	56.428	64.5197	NaN	NaN	NaN	NaN	NaN	NaN	NaN	48.6027	9.60528	NaN	NaN	NaN	NaN	29.8849	NaN	NaN	NaN	NaN	NaN	NaN	NaN	7.50689	8.88621	NaN	51.3847
	56.9747	66.0866	NaN	NaN	NaN	NaN	NaN	NaN	NaN	48.4034	9.87321	NaN	NaN	NaN	NaN	31.4788	NaN	NaN	NaN	NaN	NaN	NaN	NaN	9.90533	8.48007	NaN	52.6543
	53.1286	66.9453	NaN	NaN	NaN	NaN	NaN	NaN	NaN	47.2148	8.78034	NaN	NaN	NaN	NaN	29.8457	NaN	NaN	NaN	NaN	NaN	NaN	NaN	11.3118	7.75469	NaN	49.8292
	52.1704	68.0826	NaN	NaN	NaN	NaN	NaN	NaN	NaN	46.7099	8.56485	NaN	NaN	NaN	NaN	30.7316	NaN	NaN	NaN	NaN	NaN	NaN	NaN	14.4633	8.27966	NaN	50.679
	48.168	65.3997	NaN	NaN	NaN	NaN	NaN	NaN	NaN	44.5127	8.10872	NaN	NaN	NaN	NaN	29.0274	NaN	NaN	NaN	NaN	NaN	NaN	NaN	14.7322	9.36709	NaN	48.7971
	46.3861	67.5772	NaN	NaN	NaN	NaN	NaN	NaN	NaN	44.2533	7.81885	NaN	NaN	NaN	NaN	29.0153	NaN	NaN	NaN	NaN	NaN	NaN	NaN	15.0684	12.5432	NaN	49.3546
	44.9143	65.3311	NaN	NaN	NaN	NaN	NaN	NaN	NaN	42.4078	5.27606	NaN	NaN	NaN	NaN	24.4748	NaN	NaN	NaN	NaN	NaN	NaN	NaN	13.9334	12.6508	NaN	48.3072
	44.3161	66.2367	NaN	NaN	NaN	NaN	NaN	NaN	NaN	41.4643	6.42886	NaN	NaN	NaN	NaN	24.6524	NaN	NaN	NaN	NaN	NaN	NaN	NaN	13.2196	12.2154	NaN	48.0666
	44.115	63.9097	NaN	NaN	NaN	NaN	NaN	NaN	NaN	38.9205	7.17734	NaN	NaN	NaN	NaN	26.7128	NaN	NaN	NaN	NaN	NaN	NaN	NaN	10.8477	12.9436	NaN	48.2817
	43.7553	62.3046	NaN	NaN	NaN	NaN	NaN	NaN	NaN	34.6979	7.57183	NaN	NaN	NaN	NaN	26.5128	NaN	NaN	NaN	NaN	NaN	NaN	NaN	14.9003	7.97011	NaN	47.5329
	42.7193	61.4508	NaN	NaN	NaN	NaN	NaN	NaN	NaN	31.9783	5.3062	NaN	NaN	NaN	NaN	21.5807	NaN	NaN	NaN	NaN	NaN	NaN	NaN	2.56395	7.44667	NaN	45.0489
	43.5831	63.6432	NaN	NaN	NaN	NaN	NaN	NaN	NaN	32.3581	5.6402	NaN	NaN	NaN	NaN	24.1333	NaN	NaN	NaN	NaN	NaN	NaN	NaN	3.02714	9.00168	NaN	43.8878
	43.4802	61.954	NaN	NaN	NaN	NaN	NaN	NaN	NaN	29.1839	5.083	NaN	NaN	NaN	NaN	22.2764	NaN	NaN	NaN	NaN	NaN	NaN	NaN	2.36017	7.80624	NaN	40.9106
	44.7566	64.3581	NaN	NaN	NaN	NaN	NaN	NaN	NaN	30.0116	5.99476	NaN	NaN	NaN	NaN	23.9912	NaN	NaN	NaN	NaN	NaN	NaN	NaN	4.43264	9.80244	NaN	40.4098
	46.6288	61.5205	NaN	NaN	NaN	NaN	NaN	NaN	NaN	26.0313	4.72334	NaN	NaN	NaN	NaN	22.5379	NaN	NaN	NaN	NaN	NaN	NaN	NaN	3.17305	11.9537	NaN	37.4107
	49.5377	63.4752	NaN	NaN	NaN	NaN	NaN	NaN	NaN	27.2716	5.90354	NaN	NaN	NaN	NaN	23.7666	NaN	NaN	NaN	NaN	NaN	NaN	NaN	3.50956	12.0016	NaN	37.0667
	48.6958	61.0486	NaN	NaN	NaN	NaN	NaN	NaN	NaN	26.0609	5.46094	NaN	NaN	NaN	NaN	22.1687	NaN	NaN	NaN	NaN	NaN	NaN	NaN	2.12945	12.3875	NaN	33.4384
	50.5932	60.2228	NaN	NaN	NaN	NaN	NaN	NaN	NaN	26.3445	6.51872	NaN	NaN	NaN	NaN	23.2521	NaN	NaN	NaN	NaN	NaN	NaN	NaN	1.88219	15.565	NaN	33.9865
	51.2101	58.2667	NaN	NaN	NaN	NaN	NaN	NaN	NaN	25.3682	4.99655	NaN	NaN	NaN	NaN	20.4075	NaN	NaN	NaN	NaN	NaN	NaN	NaN	0.675036	14.7342	NaN	32.6189
	55.2732	57.9599	NaN	NaN	NaN	NaN	NaN	NaN	NaN	27.9348	5.36214	NaN	NaN	NaN	NaN	20.618	NaN	NaN	NaN	NaN	NaN	NaN	NaN	0.905928	14.878	NaN	32.2911
	54.6243	57.6018	NaN	NaN	NaN	NaN	NaN	NaN	NaN	28.8645	4.51344	NaN	NaN	NaN	NaN	17.773	NaN	NaN	NaN	NaN	NaN	NaN	NaN	0.619487	10.6221	NaN	30.7956
	56.5476	59.9001	NaN	NaN	NaN	NaN	NaN	NaN	NaN	31.6767	5.00034	NaN	NaN	NaN	NaN	19.0368	NaN	NaN	NaN	NaN	NaN	NaN	NaN	1.84349	12.8696	NaN	31.5266
	57.0874	60.4723	NaN	NaN	NaN	NaN	NaN	NaN	NaN	33.9821	4.8211	NaN	NaN	NaN	NaN	16.3431	NaN	NaN	NaN	NaN	NaN	NaN	NaN	0.0114134	14.146	NaN	30.1746
	58.5446	63.4658	NaN	NaN	NaN	NaN	NaN	NaN	NaN	37.1377	6.98528	NaN	NaN	NaN	NaN	17.066	NaN	NaN	NaN	NaN	NaN	NaN	NaN	1.08603	16.4188	NaN	30.1964
	59.0317	63.5286	NaN	NaN	NaN	NaN	NaN	NaN	NaN	38.1442	6.6824	NaN	NaN	NaN	NaN	15.3686	NaN	NaN	NaN	NaN	NaN	NaN	NaN	0.732288	13.9855	NaN	29.6407
	62.2785	66.3988	NaN	NaN	NaN	NaN	NaN	NaN	NaN	41.1287	11.561	NaN	NaN	NaN	NaN	16.9634	NaN	NaN	NaN	NaN	NaN	NaN	NaN	3.94395	17.9169	NaN	30.4733
	61.6747	66.4692	NaN	NaN	NaN	NaN	NaN	NaN	NaN	41.5928	10.4892	NaN	NaN	NaN	NaN	17.7772	NaN	NaN	NaN	NaN	NaN	NaN	NaN	3.97885	13.7929	NaN	29.6128
	63.6528	68.75	NaN	NaN	NaN	NaN	NaN	NaN	NaN	43.4725	12.5689	NaN	NaN	NaN	NaN	21.6349	NaN	NaN	NaN	NaN	NaN	NaN	NaN	6.60661	12.6321	NaN	32.7988
	62.7163	69.3301	NaN	NaN	NaN	NaN	NaN	NaN	NaN	43.1494	12.4916	NaN	NaN	NaN	NaN	20.9301	NaN	NaN	NaN	NaN	NaN	NaN	NaN	6.39528	9.91694	NaN	33.76
	64.3573	71.6611	NaN	NaN	NaN	NaN	NaN	NaN	NaN	43.8478	12.8144	NaN	NaN	NaN	NaN	16.166	NaN	NaN	NaN	NaN	NaN	NaN	NaN	7.92655	9.99593	NaN	37.9222
	62.2413	73.9081	NaN	NaN	NaN	NaN	NaN	NaN	NaN	42.7885	9.96179	NaN	NaN	NaN	NaN	24.4315	NaN	NaN	NaN	NaN	NaN	NaN	NaN	8.3365	8.5951	NaN	37.2944
	62.7488	77.5194	NaN	NaN	NaN	NaN	NaN	NaN	NaN	43.6519	10.1339	NaN	NaN	NaN	NaN	28.7036	NaN	NaN	NaN	NaN	NaN	NaN	NaN	11.2094	8.43587	NaN	41.0396
	61.0381	77.2581	NaN	NaN	NaN	NaN	NaN	NaN	NaN	41.2594	9.38651	NaN	NaN	NaN	NaN	27.6929	NaN	NaN	NaN	NaN	NaN	NaN	NaN	10.1281	8.12311	NaN	40.1623
	61.0446	80.5325	NaN	NaN	NaN	NaN	NaN	NaN	NaN	40.5709	9.18566	NaN	NaN	NaN	NaN	30.1809	NaN	NaN	NaN	NaN	NaN	NaN	NaN	11.256	7.95201	NaN	40.7613
	57.9106	80.088	NaN	NaN	NaN	NaN	NaN	NaN	NaN	37.4117	8.22826	NaN	NaN	NaN	NaN	29.0212	NaN	NaN	NaN	NaN	NaN	NaN	NaN	10.3316	9.77841	NaN	42.6664
	58.1575	82.2826	NaN	NaN	NaN	NaN	NaN	NaN	NaN	37.0051	8.77013	NaN	NaN	NaN	NaN	29.3649	NaN	NaN	NaN	NaN	NaN	NaN	NaN	10.6274	10.8222	NaN	47.6221
	56.4611	80.9063	NaN	NaN	NaN	NaN	NaN	NaN	NaN	33.6391	8.40562	NaN	NaN	NaN	NaN	27.7999	NaN	NaN	NaN	NaN	NaN	NaN	NaN	10.916	9.72673	NaN	48.3447
	56.7257	80.5272	NaN	NaN	NaN	NaN	NaN	NaN	NaN	32.229	9.38608	NaN	NaN	NaN	NaN	32.7743	NaN	NaN	NaN	NaN	NaN	NaN	NaN	11.7361	11.1075	NaN	52.2058
	56.4707	79.4987	NaN	NaN	NaN	NaN	NaN	NaN	NaN	30.8228	8.77074	NaN	NaN	NaN	NaN	29.0016	NaN	NaN	NaN	NaN	NaN	NaN	NaN	12.8198	11.7981	NaN	55.8192
	53.7962	78.0677	NaN	NaN	NaN	NaN	NaN	NaN	NaN	30.9947	8.4992	NaN	NaN	NaN	NaN	28.0588	NaN	NaN	NaN	NaN	NaN	NaN	NaN	14.7257	12.3251	NaN	56.9324
	52.9296	74.8285	NaN	NaN	NaN	NaN	NaN	NaN	NaN	30.524	8.58787	NaN	NaN	NaN	NaN	26.8531	NaN	NaN	NaN	NaN	NaN	NaN	NaN	15.7284	9.09012	NaN	56.295
	54.0206	73.5205	NaN	NaN	NaN	NaN	NaN	NaN	NaN	30.8059	2.44152	NaN	NaN	NaN	NaN	27.3225	NaN	NaN	NaN	NaN	NaN	NaN	NaN	20.4279	10.7453	NaN	56.0217
	54.2765	71.8859	NaN	NaN	NaN	NaN	NaN	NaN	NaN	30.8693	2.1974	NaN	NaN	NaN	NaN	26.3828	NaN	NaN	NaN	NaN	NaN	NaN	NaN	19.9073	10.6467	NaN	53.0657
	54.9355	71.8475	NaN	NaN	NaN	NaN	NaN	NaN	NaN	31.5023	3.79602	NaN	NaN	NaN	NaN	27.4762	NaN	NaN	NaN	NaN	NaN	NaN	NaN	22.8075	11.8933	NaN	51.7786
	55.4865	68.0965	NaN	NaN	NaN	NaN	NaN	NaN	NaN	31.3214	2.24847	NaN	NaN	NaN	NaN	27.3336	NaN	NaN	NaN	NaN	NaN	NaN	NaN	20.5339	12.7634	NaN	47.3832
	55.4537	67.1239	NaN	NaN	NaN	NaN	NaN	NaN	NaN	32.416	2.74328	NaN	NaN	NaN	NaN	27.6093	NaN	NaN	NaN	NaN	NaN	NaN	NaN	19.6477	13.8825	NaN	46.584
	55.3558	64.7836	NaN	NaN	NaN	NaN	NaN	NaN	NaN	32.6308	2.2489	NaN	NaN	NaN	NaN	23.2048	NaN	NaN	NaN	NaN	NaN	NaN	NaN	15.3298	13.6439	NaN	45.949
	55.9778	64.0704	NaN	NaN	NaN	NaN	NaN	NaN	NaN	34.9346	2.75138	NaN	NaN	NaN	NaN	26.6371	NaN	NaN	NaN	NaN	NaN	NaN	NaN	15.7818	13.2606	NaN	45.8529
	54.9076	66.877	NaN	NaN	NaN	NaN	NaN	NaN	NaN	35.8463	0.310244	NaN	NaN	NaN	NaN	22.7775	NaN	NaN	NaN	NaN	NaN	NaN	NaN	13.9272	10.4659	NaN	45.304
	56.3774	67.4796	NaN	NaN	NaN	NaN	NaN	NaN	NaN	39.7072	1.55694	NaN	NaN	NaN	NaN	22.5489	NaN	NaN	NaN	NaN	NaN	NaN	NaN	14.7826	13.4521	NaN	47.5913
	56.6726	67.2753	NaN	NaN	NaN	NaN	NaN	NaN	NaN	40.0452	0.366391	NaN	NaN	NaN	NaN	21.9914	NaN	NaN	NaN	NaN	NaN	NaN	NaN	14.4464	11.9394	NaN	45.1726
	58.7879	69.9427	NaN	NaN	NaN	NaN	NaN	NaN	NaN	42.9927	2.31514	NaN	NaN	NaN	NaN	21.7647	NaN	NaN	NaN	NaN	NaN	NaN	NaN	15.937	13.3514	NaN	47.744
	58.5223	68.9951	NaN	NaN	NaN	NaN	NaN	NaN	NaN	42.035	1.66776	NaN	NaN	NaN	NaN	21.8989	NaN	NaN	NaN	NaN	NaN	NaN	NaN	14.6749	12.591	NaN	47.7616
	61.5754	69.8617	NaN	NaN	NaN	NaN	NaN	NaN	NaN	45.2133	5.1769	NaN	NaN	NaN	NaN	24.2612	NaN	NaN	NaN	NaN	NaN	NaN	NaN	15.6271	11.959	NaN	48.2047
	62.0289	69.737	NaN	NaN	NaN	NaN	NaN	NaN	NaN	44.4787	5.30368	NaN	NaN	NaN	NaN	23.0458	NaN	NaN	NaN	NaN	NaN	NaN	NaN	14.442	15.5849	NaN	47.5895
	63.4859	71.7127	NaN	NaN	NaN	NaN	NaN	NaN	NaN	45.5634	8.70694	NaN	NaN	NaN	NaN	21.878	NaN	NaN	NaN	NaN	NaN	NaN	NaN	17.801	17.4165	NaN	49.2652
	63.7964	73.4117	NaN	NaN	NaN	NaN	NaN	NaN	NaN	44.7418	9.45107	NaN	NaN	NaN	NaN	25.8142	NaN	NaN	NaN	NaN	NaN	NaN	NaN	16.4701	14.574	NaN	50.1814
	63.422	73.8862	NaN	NaN	NaN	NaN	NaN	NaN	NaN	45.8128	11.4215	NaN	NaN	NaN	NaN	28.9902	NaN	NaN	NaN	NaN	NaN	NaN	NaN	19.6709	14.0299	NaN	50.469
	63.3896	73.7577	NaN	NaN	NaN	NaN	NaN	NaN	NaN	44.9609	11.2545	NaN	NaN	NaN	NaN	27.8712	NaN	NaN	NaN	NaN	NaN	NaN	NaN	20.839	12.8197	NaN	49.6265
	63.3573	73.1878	NaN	NaN	NaN	NaN	NaN	NaN	NaN	46.3686	11.4802	NaN	NaN	NaN	NaN	29.1856	NaN	NaN	NaN	NaN	NaN	NaN	NaN	25.1321	12.9768	NaN	48.7256
	63.4866	70.4939	NaN	NaN	NaN	NaN	NaN	NaN	NaN	44.2108	10.7143	NaN	NaN	NaN	NaN	29.0074	NaN	NaN	NaN	NaN	NaN	NaN	NaN	24.8584	12.2891	NaN	47.8281
	63.8714	68.7076	NaN	NaN	NaN	NaN	NaN	NaN	NaN	44.0824	10.932	NaN	NaN	NaN	NaN	29.6068	NaN	NaN	NaN	NaN	NaN	NaN	NaN	29.1577	12.1059	NaN	47.5711
	63.3577	73.822	NaN	NaN	NaN	NaN	NaN	NaN	NaN	41.1852	10.1677	NaN	NaN	NaN	NaN	29.5619	NaN	NaN	NaN	NaN	NaN	NaN	NaN	28.6645	11.9821	NaN	45.7978
	64.4905	58.9112	NaN	NaN	NaN	NaN	NaN	NaN	NaN	40.504	10.2407	NaN	NaN	NaN	NaN	32.7219	NaN	NaN	NaN	NaN	NaN	NaN	NaN	30.598	12.9	NaN	46.1387
	63.9204	54.779	NaN	NaN	NaN	NaN	NaN	NaN	NaN	37.3631	9.82639	NaN	NaN	NaN	NaN	31.1382	NaN	NaN	NaN	NaN	NaN	NaN	NaN	31.2274	12.2271	NaN	46.376
	64.3704	53.861	NaN	NaN	NaN	NaN	NaN	NaN	NaN	37.4645	10.2037	NaN	NaN	NaN	NaN	34.025	NaN	NaN	NaN	NaN	NaN	NaN	NaN	34.2344	15.2315	NaN	48.2286
	64.0815	50.4143	NaN	NaN	NaN	NaN	NaN	NaN	NaN	34.0535	9.42615	NaN	NaN	NaN	NaN	30.0765	NaN	NaN	NaN	NaN	NaN	NaN	NaN	35.1714	14.8238	NaN	49.4008
	64.0757	49.6378	NaN	NaN	NaN	NaN	NaN	NaN	NaN	33.2965	9.60199	NaN	NaN	NaN	NaN	30.964	NaN	NaN	NaN	NaN	NaN	NaN	NaN	29.6313	16.4003	NaN	51.7098
	65.9609	50.4271	NaN	NaN	NaN	NaN	NaN	NaN	NaN	31.7909	8.76209	NaN	NaN	NaN	NaN	29.9253	NaN	NaN	NaN	NaN	NaN	NaN	NaN	41.0822	17.146	NaN	52.6454
	65.8903	51.5841	NaN	NaN	NaN	NaN	NaN	NaN	NaN	30.8352	6.87259	NaN	NaN	NaN	NaN	32.5816	NaN	NaN	NaN	NaN	NaN	NaN	NaN	44.1151	18.5491	NaN	53.1774
	65.6118	48.506	NaN	NaN	NaN	NaN	NaN	NaN	NaN	27.62	6.04603	NaN	NaN	NaN	NaN	20.3881	NaN	NaN	NaN	NaN	NaN	NaN	NaN	44.6509	15.3605	NaN	52.3208
	67.8854	49.391	NaN	NaN	NaN	NaN	NaN	NaN	NaN	25.4966	8.5545	NaN	NaN	NaN	NaN	21.2813	NaN	NaN	NaN	NaN	NaN	NaN	NaN	48.8494	13.8634	NaN	52.6675
	67.0206	50.0324	NaN	NaN	NaN	NaN	NaN	NaN	NaN	23.7302	7.58614	NaN	NaN	NaN	NaN	24.7867	NaN	NaN	NaN	NaN	NaN	NaN	NaN	50.3988	13.0913	NaN	51.9114
	68.8762	43.5087	NaN	NaN	NaN	NaN	NaN	NaN	NaN	23.712	9.43739	NaN	NaN	NaN	NaN	29.2071	NaN	NaN	NaN	NaN	NaN	NaN	NaN	53.4341	13.5375	NaN	52.8163
	66.9873	43.3381	NaN	NaN	NaN	NaN	NaN	NaN	NaN	22.2203	7.47979	NaN	NaN	NaN	NaN	27.917	NaN	NaN	NaN	NaN	NaN	NaN	NaN	54.6971	13.1298	NaN	51.5738
	66.8528	44.0944	NaN	NaN	NaN	NaN	NaN	NaN	NaN	23.0777	8.38496	NaN	NaN	NaN	NaN	20.8347	NaN	NaN	NaN	NaN	NaN	NaN	NaN	58.6243	14.1483	NaN	52.44
	64.1346	43.5978	NaN	NaN	NaN	NaN	NaN	NaN	NaN	22.0042	7.53838	NaN	NaN	NaN	NaN	23.034	NaN	NaN	NaN	NaN	NaN	NaN	NaN	60.9061	14.3583	NaN	49.6044
	62.9173	44.841	NaN	NaN	NaN	NaN	NaN	NaN	NaN	23.4693	8.29115	NaN	NaN	NaN	NaN	31.3275	NaN	NaN	NaN	NaN	NaN	NaN	NaN	65.1015	17.2588	NaN	49.8639
	61.4058	46.4308	NaN	NaN	NaN	NaN	NaN	NaN	NaN	22.8351	6.67892	NaN	NaN	NaN	NaN	29.9966	NaN	NaN	NaN	NaN	NaN	NaN	NaN	62.7664	17.4097	NaN	52.195
	61.1042	48.79	NaN	NaN	NaN	NaN	NaN	NaN	NaN	23.8768	9.51984	NaN	NaN	NaN	NaN	24.3759	NaN	NaN	NaN	NaN	NaN	NaN	NaN	64.2624	19.5747	NaN	44.139
	58.2206	50.19	NaN	NaN	NaN	NaN	NaN	NaN	NaN	25.33	8.6325	NaN	NaN	NaN	NaN	44.011	NaN	NaN	NaN	NaN	NaN	NaN	NaN	62.2667	18.0706	NaN	39.413
	57.3596	52.044	NaN	NaN	NaN	NaN	NaN	NaN	NaN	26.6227	10.4865	NaN	NaN	NaN	NaN	45.8984	NaN	NaN	NaN	NaN	NaN	NaN	NaN	64.6326	18.6414	NaN	37.7095
	56.4964	53.1794	NaN	NaN	NaN	NaN	NaN	NaN	NaN	25.7176	10.6694	NaN	NaN	NaN	NaN	44.5869	NaN	NaN	NaN	NaN	NaN	NaN	NaN	63.9339	18.3868	NaN	35.9728
	58.0826	56.0008	NaN	NaN	NaN	NaN	NaN	NaN	NaN	27.4825	14.2135	NaN	NaN	NaN	NaN	46.9735	NaN	NaN	NaN	NaN	NaN	NaN	NaN	61.5931	20.7173	NaN	36.3961
	57.098	57.6018	NaN	NaN	NaN	NaN	NaN	NaN	NaN	28.9249	13.5136	NaN	NaN	NaN	NaN	45.7421	NaN	NaN	NaN	NaN	NaN	NaN	NaN	61.5071	20.8612	NaN	36.1539
	57.1329	62.128	NaN	NaN	NaN	NaN	NaN	NaN	NaN	31.2612	16.2564	NaN	NaN	NaN	NaN	46.1534	NaN	NaN	NaN	NaN	NaN	NaN	NaN	62.8424	21.6604	NaN	37.7445
	57.0864	64.515	NaN	NaN	NaN	NaN	NaN	NaN	NaN	33.1896	15.8807	NaN	NaN	NaN	NaN	43.5381	NaN	NaN	NaN	NaN	NaN	NaN	NaN	61.9569	21.4896	NaN	36.5214
	57.7266	69.2331	NaN	NaN	NaN	NaN	NaN	NaN	NaN	37.9028	17.2272	NaN	NaN	NaN	NaN	41.5884	NaN	NaN	NaN	NaN	NaN	NaN	NaN	64.657	23.6808	NaN	37.6259
	58.2654	71.4583	NaN	NaN	NaN	NaN	NaN	NaN	NaN	39.173	16.1358	NaN	NaN	NaN	NaN	46.3578	NaN	NaN	NaN	NaN	NaN	NaN	NaN	62.1901	19.364	NaN	37.1464
	60.785	75.4973	NaN	NaN	NaN	NaN	NaN	NaN	NaN	44.0401	17.6368	NaN	NaN	NaN	NaN	30.646	NaN	NaN	NaN	NaN	NaN	NaN	NaN	65.1057	19.3311	NaN	39.3106
	61.4376	76.1995	NaN	NaN	NaN	NaN	NaN	NaN	NaN	44.7484	16.6734	NaN	NaN	NaN	NaN	44.8458	NaN	NaN	NaN	NaN	NaN	NaN	NaN	64.0492	16.9538	NaN	39.0505
	66.316	78.6357	NaN	NaN	NaN	NaN	NaN	NaN	NaN	48.2654	16.8605	NaN	NaN	NaN	NaN	25.0791	NaN	NaN	NaN	NaN	NaN	NaN	NaN	64.1918	16.9578	NaN	40.7072
	64.3731	78.2097	NaN	NaN	NaN	NaN	NaN	NaN	NaN	47.6226	16.4626	NaN	NaN	NaN	NaN	43.9731	NaN	NaN	NaN	NaN	NaN	NaN	NaN	59.4176	16.1861	NaN	40.5523
	66.0223	78.1181	NaN	NaN	NaN	NaN	NaN	NaN	NaN	50.8383	16.4471	NaN	NaN	NaN	NaN	18.7756	NaN	NaN	NaN	NaN	NaN	NaN	NaN	58.8868	16.6094	NaN	40.9903
	65.4622	73.2846	NaN	NaN	NaN	NaN	NaN	NaN	NaN	49.2187	16.2188	NaN	NaN	NaN	NaN	15.1989	NaN	NaN	NaN	NaN	NaN	NaN	NaN	55.7705	15.3363	NaN	42.4822
	66.0928	72.4594	NaN	NaN	NaN	NaN	NaN	NaN	NaN	52.1022	16.1837	NaN	NaN	NaN	NaN	14.3662	NaN	NaN	NaN	NaN	NaN	NaN	NaN	54.7794	15.7095	NaN	43.6209
	65.2814	70.9204	NaN	NaN	NaN	NaN	NaN	NaN	NaN	52.8326	15.5683	NaN	NaN	NaN	NaN	14.3595	NaN	NaN	NaN	NaN	NaN	NaN	NaN	52.7463	15.0482	NaN	43.2975
	67.0734	71.2742	NaN	NaN	NaN	NaN	NaN	NaN	NaN	53.6984	16.219	NaN	NaN	NaN	NaN	14.1671	NaN	NaN	NaN	NaN	NaN	NaN	NaN	53.0993	16.1298	NaN	43.8962
	67.848	69.8338	NaN	NaN	NaN	NaN	NaN	NaN	NaN	53.5342	15.1781	NaN	NaN	NaN	NaN	14.4639	NaN	NaN	NaN	NaN	NaN	NaN	NaN	53.4325	14.53	NaN	44.1771
	69.5655	66.6678	NaN	NaN	NaN	NaN	NaN	NaN	NaN	53.5378	14.3491	NaN	NaN	NaN	NaN	16.0854	NaN	NaN	NaN	NaN	NaN	NaN	NaN	55.275	14.0536	NaN	41.7588
	67.7887	71.6899	NaN	NaN	NaN	NaN	NaN	NaN	NaN	50.3268	13.5014	NaN	NaN	NaN	NaN	17.4844	NaN	NaN	NaN	NaN	NaN	NaN	NaN	45.9865	10.9453	NaN	41.9761
	68.701	59.4954	NaN	NaN	NaN	NaN	NaN	NaN	NaN	50.4003	12.1087	NaN	NaN	NaN	NaN	14.2633	NaN	NaN	NaN	NaN	NaN	NaN	NaN	46.9379	10.4954	NaN	42.6079
	66.9383	70.554	NaN	NaN	NaN	NaN	NaN	NaN	NaN	45.4633	11.2733	NaN	NaN	NaN	NaN	25.4176	NaN	NaN	NaN	NaN	NaN	NaN	NaN	49.2034	11.1799	NaN	43.1796
	66.558	50.7646	NaN	NaN	NaN	NaN	NaN	NaN	NaN	45.2775	11.6622	NaN	NaN	NaN	NaN	30.048	NaN	NaN	NaN	NaN	NaN	NaN	NaN	50.644	13.308	NaN	43.1877
	63.365	47.5302	NaN	NaN	NaN	NaN	NaN	NaN	NaN	42.8643	10.7942	NaN	NaN	NaN	NaN	29.8516	NaN	NaN	NaN	NaN	NaN	NaN	NaN	49.5457	14.5063	NaN	41.8204
	63.5411	47.3131	NaN	NaN	NaN	NaN	NaN	NaN	NaN	43.1289	10.1128	NaN	NaN	NaN	NaN	34.4231	NaN	NaN	NaN	NaN	NaN	NaN	NaN	50.408	16.8202	NaN	41.8899
	61.3197	43.3482	NaN	NaN	NaN	NaN	NaN	NaN	NaN	41.4486	9.02385	NaN	NaN	NaN	NaN	34.9563	NaN	NaN	NaN	NaN	NaN	NaN	NaN	48.9979	16.5147	NaN	40.4989
	62.3188	43.6532	NaN	NaN	NaN	NaN	NaN	NaN	NaN	41.7665	10.3737	NaN	NaN	NaN	NaN	38.0285	NaN	NaN	NaN	NaN	NaN	NaN	NaN	49.7319	17.8872	NaN	40.2543
	61.1751	40.8412	NaN	NaN	NaN	NaN	NaN	NaN	NaN	38.4154	7.51288	NaN	NaN	NaN	NaN	38.5032	NaN	NaN	NaN	NaN	NaN	NaN	NaN	47.344	16.7743	NaN	39.566
	63.2779	39.8397	NaN	NaN	NaN	NaN	NaN	NaN	NaN	38.503	9.0714	NaN	NaN	NaN	NaN	32.1374	NaN	NaN	NaN	NaN	NaN	NaN	NaN	47.7552	16.4582	NaN	40.1062
	63.2358	38.1305	NaN	NaN	NaN	NaN	NaN	NaN	NaN	38.9889	7.60412	NaN	NaN	NaN	NaN	42.8579	NaN	NaN	NaN	NaN	NaN	NaN	NaN	46.7107	11.7842	NaN	40.3539
	63.2755	38.5067	NaN	NaN	NaN	NaN	NaN	NaN	NaN	39.6355	8.11143	NaN	NaN	NaN	NaN	45.7512	NaN	NaN	NaN	NaN	NaN	NaN	NaN	43.9259	16.0154	NaN	42.0245
	63.1998	39.0214	NaN	NaN	NaN	NaN	NaN	NaN	NaN	39.6851	8.15483	NaN	NaN	NaN	NaN	44.6519	NaN	NaN	NaN	NaN	NaN	NaN	NaN	41.7823	17.3308	NaN	42.1571
	63.2705	41.7777	NaN	NaN	NaN	NaN	NaN	NaN	NaN	41.9465	9.54471	NaN	NaN	NaN	NaN	46.5809	NaN	NaN	NaN	NaN	NaN	NaN	NaN	42.9868	16.6163	NaN	43.7919
	63.3258	43.6166	NaN	NaN	NaN	NaN	NaN	NaN	NaN	41.8174	9.56821	NaN	NaN	NaN	NaN	43.8973	NaN	NaN	NaN	NaN	NaN	NaN	NaN	41.8873	10.9206	NaN	44.3403
	63.6122	38.3186	NaN	NaN	NaN	NaN	NaN	NaN	NaN	45.6698	11.6531	NaN	NaN	NaN	NaN	42.5588	NaN	NaN	NaN	NaN	NaN	NaN	NaN	43.8538	11.3924	NaN	46.6322
	63.9731	51.0129	NaN	NaN	NaN	NaN	NaN	NaN	NaN	44.5476	14.5638	NaN	NaN	NaN	NaN	40.9637	NaN	NaN	NaN	NaN	NaN	NaN	NaN	43.5435	10.4078	NaN	46.4126
	65.2048	40.3995	NaN	NaN	NaN	NaN	NaN	NaN	NaN	49.0797	16.8707	NaN	NaN	NaN	NaN	40.8886	NaN	NaN	NaN	NaN	NaN	NaN	NaN	45.9301	10.2274	NaN	47.4418
	63.979	56.4155	NaN	NaN	NaN	NaN	NaN	NaN	NaN	50.2275	16.1573	NaN	NaN	NaN	NaN	40.5933	NaN	NaN	NaN	NaN	NaN	NaN	NaN	46.3413	9.30582	NaN	47.9178
	64.1665	59.7023	NaN	NaN	NaN	NaN	NaN	NaN	NaN	49.5146	17.3556	NaN	NaN	NaN	NaN	42.3989	NaN	NaN	NaN	NaN	NaN	NaN	NaN	48.7722	9.16323	NaN	48.3274
	64.225	59.9631	NaN	NaN	NaN	NaN	NaN	NaN	NaN	50.8869	14.2986	NaN	NaN	NaN	NaN	42.234	NaN	NaN	NaN	NaN	NaN	NaN	NaN	50.948	9.31467	NaN	49.5656
	65.2289	64.1089	NaN	NaN	NaN	NaN	NaN	NaN	NaN	52.1786	16.6642	NaN	NaN	NaN	NaN	43.2653	NaN	NaN	NaN	NaN	NaN	NaN	NaN	52.7497	12.1669	NaN	51.6259
	64.5595	64.0151	NaN	NaN	NaN	NaN	NaN	NaN	NaN	52.766	14.2123	NaN	NaN	NaN	NaN	43.6658	NaN	NaN	NaN	NaN	NaN	NaN	NaN	55.7451	12.6158	NaN	50.7119
[truncated: 695 more rows]

## Sheet: PupilTrace-Tone-Last3Trials
Included Pupil Traces, Tone-Noise, Last 3 Trials
[truncated: 1,200 more rows]

[truncated: 9 more sheets: Velocity-tone-All10Trials, Velocity-tone-First3Trials, Velocity-tone-Last3Trials, Pupil-white noise-All10Trials, Pupil-white noise-First3Trials, Pupil-white noise-Last3Trials, Vel-white noise-All10Trials, Vel-white noise-First3Trials, Vel-white noise-Last3Trials]
