# Supplementary material for: Stimulus salience determines defensive behaviors elicited by aversively conditioned serial compound auditory stimuli
Source: eLife journal article supplement (doi:10.7554/elife.53803), 2020-03-27
Supplement: supp [file elife-53803-supp-v1.zip › elife_poa_e53803_Figure_2_source_data_2.xlsx]

## Sheet: Statistics
Figure 2 – Source Data 1
Figure panel	Group Size	Statistical test	Comparison	Significant comparisons	P-value
2F	n=10	2-Way Repeated Measures ANOVA with Stimulus and group as factors	All trials, pupil	Main Effect of Stimulus (F (1, 150) = 14.33)	p<0.001
2F	n=10	2-Way Repeated Measures ANOVA with Stimulus and group as factors	All trials, pupil	Main Effect of Group (F (1, 150) = 4.686)	p<0.05
2F	n=10	2-Way Repeated Measures ANOVA with Stimulus and group as factors	All trials, pupil	Significant Interaction of Stimulus X Group (F (1, 150) = 13.90)	p<0.001
2F	n=10	2-Way Repeated Measures ANOVA with Stimulus and group as factors	All trials, velocity	Main Effect of Stimulus (F (1, 356) = 6.2)	p<0.05
2F	n=10	2-Way Repeated Measures ANOVA with Stimulus and group as factors	All trials, velocity	Significant Interaction of Stimulus X Group (F (1, 356) = 37.09)	p<0.0001
2I	n=10	2-Way Repeated Measures ANOVA with Stimulus and group as factors	Trials 1-3, pupil	Main Effect of Stimulus (F (1, 50) = 9.136)	p<0.01
2I	n=10	2-Way Repeated Measures ANOVA with Stimulus and group as factors	Trials 1-3, pupil	Significant Interaction (F (1, 50) = 8.566)	p<0.01
2I	n=10	2-Way Repeated Measures ANOVA with Stimulus and group as factors	Trials 1-3, velocity	Significant Interaction (F (1, 104) = 11.81)	p<0.001
2L	n=10	2-Way Repeated Measures ANOVA with Stimulus and group as factors	Trials 8-10, pupil	Main Effect of Group (F (1, 34) = 6.272)	p<0.05
2L	n=10	2-Way Repeated Measures ANOVA with Stimulus and group as factors	Trials 8-10, pupil	Significant Interaction (F (1, 34) = 9.071)	p<0.01
2L	n=10	2-Way Repeated Measures ANOVA with Stimulus and group as factors	Trials 8-10, velocity	Significant Interaction (F (1, 104) = 9.988)	p<0.01
2M	n=10	Unpaired t-test	7.5 kHz tone pupil response, trials 1-3 vs. 8-10		p<0.001
2N	n=10	Unpaired t-test	White noise pupil response, trials 1-3 vs. 8-10		n.s. (p>0.05)
