# Supplementary material for: Stimulus salience determines defensive behaviors elicited by aversively conditioned serial compound auditory stimuli
Source: eLife journal article supplement (doi:10.7554/elife.53803), 2020-03-27
Supplement: supp [file elife-53803-supp-v1.zip › elife_poa_e53803_Figure_3_source_data_1.xlsx]

## Sheet: measurements for plots
Figure 3 – Source Data 1
Mouse #	1	2	3	4	5	6	7	8	9	10	11	12	13	14	15
Tone SPL step test_Group1_Freezing
BL	77.3704	85.8704	66.8889	93.1296	72.2037	51.0741	88.537	43.1111	61.0926	58.8519	70.7222	88.7593	37.8519	49.1111	56.5
Tone SPL step test_Group1_Freezing_CS1
75db	98.6667	86.3333	100	32.3333	74.6667	54.3333	83.6667	86	98.3333	100	87	92.6667	92.3333	91	99
75db	94	100	99.3333	66	49	31	100	100	100	100	85.3333	90.3333	67	96.6667	0
75db	24	97.3333	100	53.3333	58	54	62.3333	97.3333	91.6667	66.3333	71	90	96	99	30.6667
75db	93.6667	99.3333	99.6667	36.6667	86.6667	85.6667	100	97.6667	100	100	73.6667	56.6667	68.3333	81.3333	86.6667
75db	53.3333	97.6667	56	93	56	38.3333	100	98.6667	14.6667	65	81.3333	20.3333	67	42.6667	64
75db	100	100	53.3333	27.3333	85.6667	26	99.6667	100	68.6667	85.3333	95	65.6667	38	59.6667	95.6667
75db	82	100	100	92.6667	39.6667	23	54.6667	77.6667	71.3333	21.3333	97.3333	64.6667	53	100	89.3333
75db	95.3333	100	46	87.6667	40.3333	23	77.6667	100	100	61	63.3333	37.3333	100	32.6667	97
75db	83	59.6667	49.3333	36.3333	91.3333	89.6667	82	95	22.6667	86	96.3333	100	100	100	90.3333
75db	100	62	62.3333	76.6667	100	38.6667	99.6667	53.3333	100	83.6667	70.6667	94.3333	96	88.3333	98.3333
75db	80.6667	100	62.3333	84	89	55	78	100	69	37.3333	76.3333	33.6667	87.3333	79.6667	73
Tone SPL step test_Group1_Freezing_CS2
55db	100	100	100	9.66667	100	99	100	95.3333	99.3333	100	94.3333	92	85.6667	97.3333	100
60db	79.3333	100	90.6667	99.3333	99.3333	91.3333	98.3333	100	100	67.3333	100	99	96.6667	100	5
65db	0	100	100	96	73.6667	0	83.6667	79.3333	100	64.3333	45.3333	100	41.3333	100	23.3333
70db	100	100	100	43.3333	55.3333	75.3333	82.3333	91.3333	62	100	77.6667	91.3333	65.6667	63	100
75db	51.3333	100	50.3333	100	100	32	100	100	88	38	86.3333	60.6667	51.6667	95	18
80db	55.6667	66.6667	99.6667	100	92.3333	60.6667	100	61.3333	89.3333	62.6667	76.3333	51.3333	0	88.3333	89.6667
85db	76.6667	66.6667	94.6667	70.6667	51	27	55.3333	25.3333	41	37.6667	99	79	90	57.3333	67.3333
90db	8	72.3333	42	54.3333	6.66667	31.3333	22	82.6667	2	64.3333	13	40.3333	44	52.3333	56.3333
95db	54.3333	56.3333	66	77.3333	9.33333	1.66667	8	56.6667	13	66.3333	54	50	24.6667	48.3333	34.6667
100db	53	5	57	55.3333	8.33333	13	26	12.6667	1.66667	53.3333	63	34.3333	4.66667	26.3333	27
105db	36.6667	52	25.6667	13.6667	18.6667	15.3333	72.6667	34.3333	0	65.3333	30.3333	13.6667	23.6667	39.3333	7.66667
Tone SPL step test_Group3_Freezing
BL	96.1481	90.537	89.8704	54.6111	9.59259	91.7407	70.537	83.8148	72.5741	60.2037
Tone SPL step test_Group3_Freezing_CS1
75db	100	95.3333	88.6667	82.3333	0	84	62.6667	86.3333	58.6667	25.3333
75db	100	71.3333	28.3333	15.3333	30.3333	60.6667	50.3333	100	66.6667	86.3333
75db	100	76	93.6667	39.6667	0	64	35.6667	100	50.6667	45.6667
75db	86	76	74	40	39	85.6667	99.3333	99.6667	84.3333	79.6667
75db	100	72	75.6667	93.6667	55	88.3333	88.6667	99.3333	53.6667	85.6667
75db	100	5.66667	67.6667	85.3333	42.6667	98.6667	100	89.6667	60.3333	74.6667
75db	100	80	78.3333	94	33.3333	81	58.6667	93.6667	79.6667	62.3333
75db	100	87	67.3333	83.6667	100	76.6667	82	100	91.3333	69.3333
75db	86.6667	32.6667	47	76.3333	49.3333	81.6667	85.6667	72	85	23.3333
75db	100	68.6667	52.3333	69.3333	87.3333	17.6667	87	91	41.3333	73
75db	84.3333	61	15.6667	0	92	25	54.6667	55.6667	66.6667	22
Tone SPL step test_Group3_Freezing_CS2
55db	100	90	94.3333	80.6667	11.6667	100	83.3333	91	99.6667	32.3333
60db	100	94.3333	69.3333	0	78.6667	100	91.3333	100	85.3333	100
65db	100	100	94.6667	79	0	92.6667	42	100	0	81.3333
70db	96.6667	100	44.6667	35.3333	28.6667	100	59.6667	100	76.3333	100
75db	100	92	46.3333	73	100	80.3333	83.6667	100	37	99.6667
80db	100	29.6667	23	88.6667	0	65	74	100	88.3333	31.6667
85db	63.6667	81	74.6667	61.3333	60.3333	86	79.6667	90.6667	30.6667	28
90db	92.3333	47	53.3333	48.6667	2.33333	77.6667	79	75	42.6667	36
95db	61.3333	21	22	61.3333	9	49.3333	63.6667	48.3333	10.3333	37.6667
100db	32.3333	35.3333	34.3333	35	28.6667	4.33333	22	95.6667	9.33333	41
105db	84.3333	55.3333	10.3333	8.66667	1.33333	48	30.6667	35.6667	3.33333	38.6667
Tone SPL step test_Group1_Activity
BL	8.4663	5.06593	10.8687	2.66037	13.8889	18.292	2.84981	36.5444	33.8598	27.0439	9.51519	3.26352	20.0539	23.6174	22.2624
Tone SPL step test_Group1_Activity_CS1
75db	0.81	4.64333	0.036667	183.34	20.7067	25.4067	8.53667	5.13667	1.09667	0.153333	3.61667	1.55333	4.65333	4.9	0.526667
75db	3.50333	0.013333	0.476667	24.46	109.933	108.81	0.213333	0.056667	0.036667	0.013333	8.54667	1.61	34.1433	1.2	13.8733
75db	102.543	0.39	0.346667	42.8033	89.2433	57.7367	73.7267	2.42333	2.01333	69.3133	11.99	3.50667	4.85	0.576667	200.133
75db	0.936667	0.246667	0.12	137.33	2.35	8.54	0.04	1.56667	0	0.006667	24.7167	227.693	69.2833	5	5.91
75db	27.1267	1.23	138.903	2.31	28.0367	52.6767	0.016667	0.77	566.193	74.5133	17.4867	251.33	36.9867	190.723	26.1767
75db	0.056667	0.053333	144.74	137.8	19.73	64.1267	0.356667	0	52.4967	62.83	2.83333	185.803	51.66	27.17	0.55
75db	62.24	0.003333	0.006667	2.48	121.807	124.767	130.08	9.91333	27.8967	164.827	0.73	19.4733	51.2733	0.806667	5.80667
75db	1.04333	0	160.51	9.95667	66.0567	88.3433	36.72	0.623333	0.19	39.9167	115.593	51.6333	0.023333	108.71	4.68667
75db	4.32667	93.3733	26.73	37.3233	2.30667	2.89	13.73	2.17333	221.773	11.9867	2.79	0.14	0.01	0.013333	5.09333
75db	0.006667	71.1733	106.98	11.8433	0	141.79	0.24	200.047	0.016667	4.38333	99.2767	1.40667	1.34333	3.28667	1.04667
75db	69.44	0.11	22.62	7.18333	3.47	65.5833	19.5833	0.006667	67.16	129.713	100.733	347.517	1.49	5.94333	19.5567
Tone SPL step test_Group1_Activity_CS2
55db	0	0.01	0.003333	114.42	0	0.64	0.016667	0.85	0.32	0.1	1.36333	1.71	1.74667	1.24667	0.056667
60db	15.4633	0	1.79	0.156667	1.33667	4.04333	1.51333	0.003333	0.003333	71.22	0.136667	0.626667	0.506667	0.01	9.36667
65db	145.71	0.043333	0.06	0.976667	10.0533	93.5067	4.24667	6.02667	0	77.9167	176.527	0.07	80.3033	0.003333	146.707
70db	0	0	0.03	82.0067	103.28	6.43	5.67333	1.50333	86.1167	0	16.02	1.03333	35.77	31.4167	0.076667
75db	50.97	0.073333	43.4233	0.11	0	38.29	0	0	12.5833	123.46	7.31667	156.933	35.07	1.25333	369.707
80db	32.2967	11.61	0.126667	0.19	11.7667	37.3033	0.043333	41.4567	7.19667	37.5767	98.55	28.4533	410.62	3.62667	2.08333
85db	20.14	58.5633	2.13	33.94	34.46	122.907	27.1733	54.8367	385.917	47.8267	0.566667	16.7167	6.44333	90.24	12.32
90db	231.85	60.4833	156.897	42.8767	312.83	111.437	169.427	6.10667	341.303	41.83	242.407	209.243	61.0833	44.85	140.907
95db	35.8533	25.26	26.36	15.0533	194.49	192.767	628.913	18.13	502.553	13.5933	45.6433	173.093	132.02	37.1333	127.083
100db	32.0567	143.737	46.0533	31.5	244.307	165.593	115.633	119.167	457.053	113.317	26.31	371.62	202.257	87.6467	173.09
105db	43.8167	33.7067	172.237	147.957	229.183	133.173	36.3933	135.573	692.657	51.3067	142.117	212.48	92.1133	72.9567	549
Tone SPL step test_Group3_Activity
BL	1.04315	2.84519	2.74759	23.1998	147.294	1.75204	11.3415	3.97741	18.7943	6.24926
Tone SPL step test_Group3_Activity_CS1
75db	0.003333	2.00333	2.68667	7.21667	75.1967	5.45	18.9	7.15333	14.86	13.9
75db	0.14	8.35	125.31	69.7367	53.6433	79.32	41.32	0.033333	15.6667	2.93667
75db	0.03	16.1233	1.66	79.33	456.463	8.43333	16.8033	0	29.5433	15.0133
75db	4.17333	6.51333	48.2567	96.2833	17.4767	2.82333	0.47	0.4	6.97667	7.19333
75db	0.116667	10.7733	36.1867	4.31	29.7233	2.4	2.78333	0.47	70.1733	4.77333
75db	0.17	113.657	11.9267	5.12333	358.91	0.923333	0.036667	2.52333	38.9867	8.40333
75db	0.053333	5.93333	14.63	2.47	53.38	3.74667	15.3433	0.71	17.7367	15.6833
75db	0.203333	3.39333	17.31	6.09	0.446667	4.16333	2.94	0	8.75	12.5267
75db	1.86	35.4133	27.5567	6.46667	109.52	4.52	6.16667	4.86	24.42	37.9033
75db	0.003333	11.7233	14.8067	6.43	2.89333	112.317	3.59	1.28	167.65	15.46
75db	4.19333	11.37	86.0267	81.65	2.35	121.267	13.91	13.37	27.43	48.6567
Tone SPL step test_Group3_Activity_CS2
55db	0	2.00667	0.926667	4.42333	16.8467	0.006667	7.55667	3.24667	0.283333	5.25333
60db	0	2.37333	4.90667	266.043	28.7867	0.003333	1.75667	0.01	8.41667	0.02
65db	0.003333	0.38	1.26	9.32667	97.7367	2.64	130.897	0.003333	179.593	8.47667
70db	0.71	0.133333	61.9667	75.5167	91.8	0.013333	13.9033	0.013333	5.97	0.136667
75db	0.016667	2.02667	59.2667	9.41667	0.323333	6.51	3.02667	0	143.707	0.613333
80db	0.083333	55.84	151.173	2.66	203.31	8.75667	9.44333	0.01	8.64667	25.7667
85db	15.1833	7.07333	9.48333	13.7233	43.8967	4.21	5.44333	4.44667	70.5167	46.9433
90db	3.26667	73.7767	36.6	24.1233	218.53	6.75667	8.51667	6.25333	69.5367	36.8533
95db	23.8833	33.9467	243.263	16.8433	92.7633	13.7167	13.5567	16.8233	381.2	32.7467
100db	52.1367	24.2833	140.773	24.4633	18.7567	79.1633	99.9233	2.42667	243.37	61.4333
105db	11.1333	23.6567	124.237	100.38	228.2	24.4533	126.22	23.01	140.253	36.11
Tone SPL step test_Group1_EscapeScore
Tone SPL step test_Group1_EscapeScore_CS1
75db	-0.04613	0.029875	-0.02529	3.85767	-0.28884	-0.20475	0.056471	0.029813	-0.0574	-0.04222	-0.03187	-0.0004	-0.27902	-0.14276	-0.04562
75db	0.023441	-0.00056	-0.04439	0.244374	1.94243	3.00692	-0.01109	-0.05949	-0.00309	-0.01314	0.036482	0.011796	-1.84787	-0.03573	-0.04928
75db	0.931097	0.003876	-0.03535	0.415934	1.89231	0.595288	0.704162	-0.00829	-0.18978	1.69083	-0.00347	-0.0531	-0.04545	0.005736	3.97918
75db	0.009336	0.002436	-0.00774	2.28999	0.023422	0.032197	-0.00735	0.011474	-3.3e-05	-0.03218	0.017613	1.7803	0.367303	0.014107	0.02644
75db	0.265143	0.012746	2.32732	0.018673	0.279435	0.418402	0.000166	-0.00308	8.67341	1.74303	0.062504	4.28427	0.318616	1.86897	0.185277
75db	0.000443	0.000465	2.39553	1.36925	0.207452	1.3395	-0.00066	-0.00038	0.523167	3.6345	0.028239	2.7998	0.507547	0.266524	-0.02763
75db	1.62555	3.32e-05	5.53e-05	0.023597	2.21402	3.19025	1.91606	-0.25796	0.122057	4.64274	0.007076	0.176883	0.492495	0.00804	0.003889
75db	0.010399	0	3.58752	-0.03156	0.613421	1.38401	0.365969	0.004359	0.001894	0.397929	4.02566	0.506949	-0.00431	1.05705	-0.07494
75db	0.042956	1.93051	0.232671	0.370772	-0.0595	-0.01717	0.107754	-0.08279	5.19677	0.066216	-0.04425	-0.00498	-0.01543	0.000133	-0.02196
75db	-0.02049	1.70452	2.0618	-0.00789	0	3.18043	-0.04397	2.81966	-0.66313	0.04119	1.98636	-0.07802	0.005719	0.032547	-0.05879
75db	2.69209	-0.0891	0.220532	0.03408	0.034407	1.60521	0.196002	-0.00596	1.52849	3.27612	2.00137	4.33418	-0.02136	-0.54799	0.174151
Tone SPL step test_Group1_EscapeScore_CS2
55db	-0.05261	-0.0163	-0.02563	1.12527	-0.49448	-0.44761	-0.02801	-0.01112	-0.06498	-0.04262	-0.05426	0.000961	-0.30497	-0.17914	-0.05017
60db	0.142677	-0.00069	-0.02971	0.001417	-0.15488	-0.03727	0.001864	-0.06002	-0.00342	1.69656	-0.04704	0.001962	-2.16917	-0.04759	-0.09311
65db	2.35847	0.000421	-0.0379	-0.00101	0.096162	1.90529	0.011671	0.027625	-0.20895	0.776578	2.64072	-0.08735	0.699737	2.21e-05	2.40383
70db	0	-2.2e-05	-0.00864	0.716072	3.02937	0.011234	0.048798	0.010677	0.865681	-0.03224	-0.06803	-1.45478	-0.97223	0.284273	-0.0317
75db	0.481156	0.000288	0.337057	-0.00322	0	0.275046	0	-0.01075	0.110454	3.23038	-0.0366	2.34091	0.311971	-0.01944	4.62172
80db	0.321705	0.115648	-0.04388	0.000118	0.110476	0.057379	-0.00379	0.414606	0.071672	0.369546	1.98226	0.22631	5.12283	0.031873	-0.01254
85db	0.19804	2.58369	1.02128	0.337118	0.343455	2.14898	-0.11683	0.193498	6.68996	0.489346	0.005448	0.149408	0.045684	2.8994	0.068806
90db	4.33309	1.61	2.5456	0.296543	8.12209	2.61417	2.68863	0.05901	7.42904	0.416866	5.39327	3.10396	0.604331	1.41881	1.28283
95db	0.357176	0.251639	0.230279	0.148812	6.90479	4.87679	14.2392	0.07668	10.9517	0.08223	0.387914	2.71881	1.30059	0.3701	2.19389
100db	0.298947	3.43046	0.454553	0.187794	6.43967	3.42295	2.10613	3.02026	5.89205	3.1269	0.259118	8.61181	2.00818	1.87334	2.65742
105db	0.437375	0.245747	3.72229	4.45099	7.28427	3.27202	0.361749	3.3452	12.8011	0.494525	2.41164	4.98126	0.881858	1.12005	8.45558
Tone SPL step test_Group3_EscapeScore
Tone SPL step test_Group3_EscapeScore_CS1
75db	-0.00526	0.010788	0.015733	-0.68152	-0.33217	0.042255	-0.05631	0.029611	0.104677	0.079804
75db	0.001395	0.060148	3.24892	0.580059	0.295242	1.7851	0.161561	-0.00578	0.133782	0.021911
75db	0.000299	0.160109	-0.00086	1.75153	4.03195	0.055873	0.139328	-0.0002	0.201064	0.139657
75db	0.041138	0.058113	-0.12198	1.49312	0.090612	-0.02003	-0.00382	-0.00036	0.036849	0.062493
75db	-0.03521	0.106654	0.278527	-0.1418	0.213559	0.019558	-9.5e-05	0.004618	0.201232	0.040405
75db	-0.00368	0.63351	-0.25242	0.01123	3.22653	-0.0023	-0.03567	0.02505	0.15987	-0.05801
75db	-0.00302	-0.03093	0.032218	-0.01445	0.051328	-0.03043	0.152901	-0.00921	-0.22624	0.118832
75db	-0.03135	-0.02127	0.131393	0.007217	-0.42747	0.037921	0.021251	-0.00014	-2.95184	0.063264
75db	0.018538	-0.31496	0.200933	0.015453	1.57484	0.018557	0.053682	0.035952	0.105165	0.374353
75db	-0.00349	0.069907	2.5554	-0.0147	0.00937	0.438712	-0.07345	0.003057	0.758353	0.108914
75db	-0.00177	0.049382	1.72191	0.562339	-0.00622	3.19579	0.048283	0.13219	0.078484	0.423388
Tone SPL step test_Group3_EscapeScore_CS2
55db	-0.00529	0.010821	-0.00241	-0.70365	-0.91662	-0.012	-0.17053	-0.00826	-0.04067	-0.00521
60db	0	0.00068	0.048881	3.5069	0.050358	-0.00543	-0.22787	-0.00608	0.061523	-0.00716
65db	3.32e-05	0.002867	-0.00425	0.053756	-0.54755	-0.00187	2.2761	-0.00017	1.70625	0.075072
70db	0.005623	-0.00547	1.01543	1.28963	0.833768	-0.04804	0.13007	-0.00422	0.027746	-0.00784
75db	-0.0362	0.019478	0.488893	-0.08958	-0.08043	0.060622	0.00233	-6.7e-05	1.91097	-0.00106
80db	-0.00454	0.061451	3.13605	-0.01336	3.57959	0.075777	0.058082	-2.2e-07	-0.14252	0.11408
85db	0.147777	-0.0197	-0.01904	0.098409	-0.04296	-0.02581	0.05423	0.028037	0.294494	0.430526
90db	-0.00082	0.680254	0.349831	0.18828	4.74761	0.063768	0.073776	0.062181	-2.34582	0.305955
95db	0.23804	-0.32971	5.35083	0.120005	0.415639	0.110318	0.127336	0.155321	5.62749	0.321329
100db	0.516116	0.195123	2.81155	0.165064	0.167476	1.10788	1.89542	0.014486	3.52177	0.567087
105db	0.067401	0.171841	3.12896	1.75101	5.24504	0.223693	2.16765	0.229665	1.19599	0.292291
White noise SPL step test_Group1_Freezing
BL	6.03704	4.22222	0	5.7963	0.314815	4.75926	8.77778	1.12963	2.66667	1.14815	1.09259	1.66667	3.44444	16.7593	1.90741
40db	47	57	42.3333	48	62	43.6667	20	43.3333	66	36.6667	36.6667	45.6667	69.3333	13	63
45db	57.3333	87.3333	63.3333	45.3333	47	76.3333	78.3333	52.3333	53	81.3333	56	61.3333	48	72.3333	82.6667
50db	16.6667	58	35.6667	70	29	35	73.3333	58.3333	5.33333	89.3333	52.6667	18.3333	56	62.6667	64.6667
55db	59	45	47.6667	56.6667	17.6667	47.3333	34	48	27.3333	70.3333	32.3333	19.6667	18	23.6667	60
60db	21	6.33333	50	10.6667	19.6667	21	17	67	1.66667	48.3333	7	20.3333	11	19	12.6667
65db	15.3333	45.6667	24	12	1.33333	33	25.6667	66.6667	17.3333	65	2	19.6667	23.3333	26.6667	10.6667
70db	43.6667	8.33333	37.3333	26.6667	10.3333	56	12	68.3333	1.66667	41.6667	28.6667	16	16	18	7
75db	26	22	1.66667	17.3333	36.6667	35.3333	37.6667	28	30	40.6667	33.6667	7.66667	54.6667	26	33.3333
White noise SPL step test_Group3_Freezing
BL	12.8704	11.7963	2.72222	1.77778	0	20.3519	2.62963	6.18519	8.98148	1.01852
40db	31.6667	37.6667	31.3333	41.3333	0	37	16.6667	68.3333	7	66.3333
45db	66.6667	56	51	48	0	47	5	60.6667	36	8.66667
50db	56.6667	37.3333	38.6667	16.6667	7.33333	43.6667	11	12	10.6667	25.3333
55db	14.3333	32.6667	24.6667	5.33333	10	55.6667	29	39	2	18.3333
60db	48	14	9	0	0	6	14.3333	22.3333	14.3333	32
65db	17.6667	15.3333	5.66667	0	0	15.6667	16.6667	1.33333	13	23.3333
70db	1.66667	19	12.6667	13.3333	5	6.66667	13.3333	37	22.3333	26.6667
75db	1.66667	0	1.66667	7	0	5.33333	5	62.3333	14.3333	1.33333
White noise SPL step test_Group1_Activity
BL	187.412	166.281	279.153	201.399	330.044	110.775	245.061	255.988	263.815	304.613	344.941	134.688	305.295	40.1796	254.119
40db	65.0533	94.1167	113.4	59.6333	94.43	71.4433	109.323	58.6133	47.77	85.2	161.717	48.9233	55.01	172.703	39.8667
45db	21.2767	11.0167	36.3033	83.09	147.997	16.42	15.8633	31.1733	119.723	11.7	50.4933	61.8567	51.52	18.3967	13.6067
50db	197.97	69.6467	60.74	24.2633	383.633	280.157	23.5667	20.4967	686.657	6.91667	79.8433	278.073	44.42	12	31.2533
55db	20.1333	59.0767	62.57	35.02	429.243	149.503	45.0033	105.523	349.21	22.8533	45.7267	243.5	239.573	181.953	57.89
60db	253.957	271.653	70.07	209.93	351.15	210.9	182.84	48.9233	656.643	48.1	582.803	247.123	344.14	163.19	120.183
65db	311.083	90.51	86.8167	308.903	544.233	260.583	259.753	26.7767	174.013	17.8833	321.287	248.527	329.94	154.67	209.723
70db	249.56	160.927	87.7767	304.107	361.437	219.94	592.697	17.42	451.32	88.1833	142.767	233.907	353.033	326.72	379.693
75db	282.927	136.003	327.753	160.4	132.593	258.193	58.3567	66.0033	461.943	205.98	121.143	275.41	51.62	229.57	300.657
White noise SPL step test_Group3_Activity
BL	130.579	111.616	249.192	168.012	353.496	88.3687	180.331	172.111	203.293	137.248
40db	146.003	101.163	98.3467	61.6767	272.917	44.3667	166.733	27.47	199.423	24.39
45db	11.6267	34.04	31.03	32.5733	246.02	27.4867	384.783	16.13	99.6267	53.2733
50db	21.6167	31.84	31.8067	97.5033	252.78	44.8333	117.717	69.1133	112.683	73.7167
55db	87.07	118.197	76.5167	213.803	160.417	30.8333	38.6433	53.1767	167.787	48.1767
60db	30.7167	48.3633	202.997	296.28	97.2767	152.43	191.95	42.8767	126.96	41.53
65db	80.18	87.9733	185.187	303.637	270.73	128.597	355.59	92.2467	135.74	63.4167
70db	273.943	180.03	163.297	189.987	164.61	306.857	87.4167	19.0967	60.0433	55.2167
75db	375.897	264.95	181.453	267.94	386.883	85.4633	379.913	13.9767	93.4233	76.8067
White noise SPL step test_Group1_EscapeScore
40db	-1.58748	-0.26498	-1.89431	-0.9911	-3.19083	-0.14849	-1.15592	-3.14908	-2.99608	-1.93336	-0.8687	-1.69831	-2.23098	1.95409	-2.53889
45db	0.128164	-1.17923	-0.60308	-1.08998	0.341759	0.089403	-0.10158	-1.01838	-0.74337	-0.07599	-0.56308	1.29134	-1.47722	-0.65317	-0.12613
50db	1.97564	0.591577	0.459542	-0.04637	1.55615	5.89256	0.219272	-0.17977	8.6812	-0.10596	0.575482	4.79129	-0.25576	0.054685	-0.52104
55db	0.199787	0.580345	0.399407	1.20501	6.18605	2.39982	0.135564	0.511827	2.79346	0.153568	0.19396	4.97354	2.4356	2.74349	0.427643
60db	2.54209	5.60868	0.588883	4.0049	5.31372	2.9348	1.79276	-0.37208	9.55156	0.378414	9.76422	4.28765	6.11806	2.60496	1.07191
65db	3.94879	1.90111	0.824803	7.07455	9.33941	4.45519	3.58841	0.131006	1.67613	0.154099	6.17082	4.33731	6.46323	3.48498	2.06764
70db	3.5007	6.60391	0.825772	5.91482	5.51088	4.09572	9.91787	0.129015	8.4738	1.13574	3.41165	5.28187	7.57618	6.19099	6.78133
75db	3.79912	3.33729	5.27077	3.57701	0.839623	4.54916	0.55741	0.618846	9.58019	3.98171	1.20042	6.73134	-0.19884	6.27632	4.99359
White noise SPL step test_Group3_EscapeScore
40db	-0.13685	-0.33064	-2.00078	-1.09857	-0.85328	-0.28975	0.514151	-1.25156	-0.90433	-1.60088
45db	0.028266	-1.62681	-0.4579	0.072985	1.63156	0.169026	3.05944	-0.11436	0.348675	0.181024
50db	0.145626	0.273914	0.265867	0.724521	1.69184	0.157257	0.903369	0.665841	0.411653	1.73
55db	0.868515	-0.76244	0.704655	2.75063	0.238169	0.165803	0.254983	1.44676	0.795299	0.355904
60db	0.293871	0.402566	1.98604	5.49688	-0.71489	2.31875	1.71307	0.404834	-0.95178	0.291257
65db	0.802746	0.269308	1.43163	4.37672	3.22074	2.26293	7.32249	0.835345	-0.68722	0.519677
70db	2.50317	2.4639	3.60107	0.240916	1.90498	5.75435	0.735846	0.179089	-0.03388	0.508789
75db	3.69267	3.18639	1.4827	4.48841	7.76194	0.802182	4.01663	0.126039	-0.72335	1.64624
