# Supplementary material for: Stimulus salience determines defensive behaviors elicited by aversively conditioned serial compound auditory stimuli
Source: eLife journal article supplement (doi:10.7554/elife.53803), 2020-03-27
Supplement: supp [file elife-53803-supp-v1.zip › elife_poa_e53803_Figure_3_source_data_2.xlsx]

## Sheet: Statistics
Figure 3 – Source Data 2
Figure panel	Group Size	Statistical test	Comparison	Significant comparisons	P-value
3D	n=15	2-Way Repeated Measures ANOVA with Trial and Stimulus as factors	tone SPL step test - paired group 1, % freezing	Main Effect of Trial (F (10, 140) = 6.214)	p<0.0001
3D	n=15	2-Way Repeated Measures ANOVA with Trial and Stimulus as factors	tone SPL step test - paired group 1, % freezing	Main Effect of Stimulus (F (1, 14) = 29.35)	p<0.0001
3D	n=15	2-Way Repeated Measures ANOVA with Trial and Stimulus as factors	tone SPL step test - paired group 1, % freezing	Significant Interaction (F (10, 140) = 9.791)	p<0.0001
3E	n=10	2-Way Repeated Measures ANOVA with Trial and Stimulus as factors	tone SPL step test - unpaired group 3, % freezing	Main Effect of Trial (F (10, 90) = 4.036)	p<0.0001
3E	n=10	2-Way Repeated Measures ANOVA with Trial and Stimulus as factors	tone SPL step test - unpaired group 3, % freezing	Main Effect of Stimulus (F (1, 9) = 9.769	p<0.05
3E	n=10	2-Way Repeated Measures ANOVA with Trial and Stimulus as factors	tone SPL step test - unpaired group 3, % freezing	Significant Interaction (F (10, 90) = 5.166)	p<0.0001
3F	n=15	2-Way Repeated Measures ANOVA with Trial and Stimulus as factors	tone SPL step test - paired group 1, average motion	Main Effect of Trial (F (10, 140) = 4.959)	p<0.0001
3F	n=15	2-Way Repeated Measures ANOVA with Trial and Stimulus as factors	tone SPL step test - paired group 1, average motion	Main Effect of Stimulus (F (1, 14) = 9.620)	p<0.01
3F	n=15	2-Way Repeated Measures ANOVA with Trial and Stimulus as factors	tone SPL step test - paired group 1, average motion	Significant Interaction (F (10, 140) = 3.759)	p<0.001
3H	n=15	2-Way Repeated Measures ANOVA with Trial and Stimulus as factors	tone SPL step test - paired group 1, escape score	Main Effect of Trial (F (10, 140) = 5.700)	p<0.0001
3H	n=15	2-Way Repeated Measures ANOVA with Trial and Stimulus as factors	tone SPL step test - paired group 1, escape score	Main Effect of Stimulus (F (1, 14) = 10.04)	p<0.01
3H	n=15	2-Way Repeated Measures ANOVA with Trial and Stimulus as factors	tone SPL step test - paired group 1, escape score	Significant Interaction (F (10, 140) = 4.124)	p<0.0001
3I	n=10	2-Way Repeated Measures ANOVA with Trial and Stimulus as factors	tone SPL step test - unpaired group 3, escape score	Main Effect of Trial (F (10, 90) = 2.310)	p<0.05
3M	group 1 paired, n=15; group 3 unpaired, n=10	2-Way Repeated Measures ANOVA with Trial and Stimulus as factors	white noise SPL step test - group 1 vs. 3, % freezing	Main Effect of Trial (F (7, 161) = 13.95)	p<0.0001
3M	group 1 paired, n=15; group 3 unpaired, n=10	2-Way Repeated Measures ANOVA with Trial and Stimulus as factors	white noise SPL step test - group 1 vs. 3, % freezing	Main Effect of Group (F (1, 23) = 16.79)	p<0.001
3N	group 1 paired, n=15; group 3 unpaired, n=10	2-Way Repeated Measures ANOVA with Trial and Stimulus as factors	white noise SPL step test - group 1 vs. 3, average motion	Main Effect of Trial (F (7, 161) = 7.079)	p<0.0001
3N	group 1 paired, n=15; group 3 unpaired, n=10	2-Way Repeated Measures ANOVA with Trial and Stimulus as factors	white noise SPL step test - group 1 vs. 3, average motion	Trial X Group Interaction (F (7, 161) = 2.366)	p<0.05
3O	group 1 paired, n=15; group 3 unpaired, n=10	2-Way Repeated Measures ANOVA with Trial and Stimulus as factors	white noise SPL step test - group 1 vs. 3, escape score	Main Effect of Trial (F (7, 161) = 17.11)	p<0.0001
3O	group 1 paired, n=15; group 3 unpaired, n=10	2-Way Repeated Measures ANOVA with Trial and Stimulus as factors	white noise SPL step test - group 1 vs. 3, escape score	Main Effect of Group (F (1, 23) = 5.878)	p<0.05
3O	group 1 paired, n=15; group 3 unpaired, n=10	2-Way Repeated Measures ANOVA with Trial and Stimulus as factors	white noise SPL step test - group 1 vs. 3, escape score	Trial by Group Interaction (F (7, 161) = 3.184)	p<0.01
