# Supplementary material for: Stimulus salience determines defensive behaviors elicited by aversively conditioned serial compound auditory stimuli
Source: eLife journal article supplement (doi:10.7554/elife.53803), 2020-03-27
Supplement: supp [file elife-53803-supp-v1.zip › elife_poa_e53803_Figure_4_source_data_1.xlsx]

## Sheet: Measurements for plots
Figure 4 – Source Data 1
Mouse #	1	2	3	4	5	6	7	8	9	10
Group4_Freezing
BL1	0.69	1.19	0	1.19	0	0.56	0	0.61	0.72	0.8
BL2	83.72	93.17	21.61	38.46	57	36.2	92.15	57.28	47.22	27.5
Group4_Freezing_CS1
Trial 1	0	0	0	0	0	0	0	0	15	0
Trial 2	22.33	18.33	13.67	57.67	44.67	38.33	22	12	0	0
Trial 3	100	80.67	71.33	32	57.33	23.33	84.33	59.33	0	12.67
Trial 4	100	49	30.67	71.67	70.67	67.33	48	69.33	0	83.33
Trial 5	100	91.33	75.33	93.33	100	67.33	72	82.67	43.33	53.67
Trial 6	89.33	100	36	70.33	64	38	100	24	79	20
Trial 7	67	55.33	100	100	50	55.33	61.33	100	91.67	100
Trial 8	100	100	93.67	78.33	74.67	62.33	100	100	74.33	0
Trial 9	94.67	42.33	100	70	66	71.33	88.67	89.33	72	44.67
Trial 10	100	70.33	92	77.33	86.33	100	87	10.67	78.67	56
Group4_Freezing_CS2
Trial 1	0	0	0	0	0	15.67	0	0	0	0
Trial 2	21.33	38.33	26.67	0	62.33	80.33	49.67	0	0	0
Trial 3	96.67	99.33	71	63.33	54	65.67	95.67	84	0	0
Trial 4	100	0	61.33	78.33	79	67.67	88.67	82.33	0	0
Trial 5	77.33	35	33	66.33	97.33	67.33	56.33	100	32.67	33.67
Trial 6	100	100	72.33	78	0	0	63.33	64.33	23	0
Trial 7	74.67	0	82	70.33	25.33	0	100	55	74.33	28.33
Trial 8	100	37.33	19.33	99	0	18.33	73	100	27.33	46.67
Trial 9	84.67	88	46	44.33	35	0	32.33	17	0	16.33
Trial 10	100	53.67	26.33	30	0	0	77	0	0	20
Group5_Freezing
BL1	0	0	0	0	0	0	0	1.41	0	0
BL2	79.46	13.83	67.54	80.06	88.74	84.11	56.76	88.91	92.98	50.7
Group5_Freezing_CS2
Trial 1	0	0	0	0	0	0	0	0	0	0
Trial 2	11.33	18	0	66.67	60.33	0	0	100	28.33	0
Trial 3	100	67	76.67	49	87.33	100	23.67	64.33	100	91.67
Trial 4	68.33	80	100	93	100	100	100	53.67	78.33	100
Trial 5	100	50.67	0	92.67	100	44.33	68.67	100	100	100
Trial 6	87.33	59.67	0	100	88.67	98.67	100	87.33	19.33	99.33
Trial 7	99.67	16	11	77.33	19	100	100	78	70	98.67
Trial 8	100	100	0	99.33	57.67	100	99	31.33	60	100
Trial 9	81	58.33	0	100	81.33	13.33	100	95	100	99.33
Trial 10	0	50	19	85.67	25	99.67	99.67	64.33	100	100
Group5_Freezing_CS1
Trial 1	0	0	0	0	0	0	0	0	0	0
Trial 2	37.33	29	0	28	0	0	10.33	99.67	0	21
Trial 3	93.67	68.67	53.33	62	71.33	96	83	35.67	74	95.33
Trial 4	95.67	93.67	33	40.67	80.33	100	64	0	56.67	98.67
Trial 5	77.67	37	0	68.33	100	100	94	72.33	77	70
Trial 6	62.67	0	0	76.67	72.33	25	68	81.33	46.33	72
Trial 7	73	0	0	56	72.33	41	100	22.33	12.67	100
Trial 8	99.67	41	49.67	47	38.67	84	95.67	12.33	0	82.67
Trial 9	100	0	23.67	64	65.33	71.67	37	38	96.33	33.67
Trial 10	54	47	13	91.33	25.33	84.33	36	52.33	69.33	89.33
Group6_Freezing
BL1	1.41	3.54	0	1.15	0	0	0	1.94	0	1.11
BL2	60.37	32.26	45.61	66.17	81.39	86.37	79.85	80.89	84.39	73.89
Group6_Freezing_CS1
Trial 1	0	0	0	0	0	0	0	0	0	0
Trial 2	0	0	0	0	0	0	0	0	0	0
Trial 3	21	10.67	36.67	28	63.67	48.67	58.67	52.67	80	91.33
Trial 4	26.67	21.67	70.33	22.33	74.67	100	57.33	33.67	80	75.33
Trial 5	79.33	78	47.67	82	73.33	100	54.33	34.33	57.67	44.67
Trial 6	13	65	34	40.33	77	100	93.67	100	82.33	57.67
Trial 7	100	55.33	78	52	82.33	100	100	36.33	76.33	100
Trial 8	46.67	0	81	25	69.67	100	0	99.67	60	99.67
Trial 9	91.67	45	45.67	0	82	74.33	100	32.67	48.67	84
Trial 10	66.33	64.33	97.67	64.67	65.67	92.33	100	74.33	77	99.33
Group6_Freezing_CS2
Trial 1	0	0	0	17.67	0	12	0	0	0	0
Trial 2	0	0	0	0	0	0	0	14.33	61.67	37.67
Trial 3	53.67	0	15.67	57	76.67	46	61.33	48.67	100	81
Trial 4	34.33	65.33	47.33	28.67	84	68.33	75	77	100	100
Trial 5	45	51	83.67	72.67	100	0	60	0	65.33	0
Trial 6	37	34.67	25	39	76	28.33	77.33	98.33	91.33	78.33
Trial 7	100	58	73.67	58.67	91	88	73.33	62.67	53.33	74.67
Trial 8	81.67	0	56.33	50.33	63.33	60	0	0	100	100
Trial 9	40.67	0	20.33	35.33	84.33	29.67	47	99	88	100
Trial 10	54	0	64	45.33	0	76.33	100	38	100	100
Group4_Activity
BL1	289.59	161.06	398	222.9	335.7	206.94	365.85	276.03	418.96	242.58
BL2	4.24	1.3	25.13	37.44	47.56	37.11	1.47	14.07	17.04	61.34
Group4_Activity_CS1
Trial 1	140.12	228.97	244.1	238.34	281.66	65.63	460.47	266.57	304.14	209.06
Trial 2	56.3	72.16	100.26	31.55	25.66	48.64	72.1	113.5	165.62	261.06
Trial 3	0.17	1.31	20.71	50.51	18.38	55.38	3.79	15.54	39.96	102.16
Trial 4	0.31	25.36	27.25	6.21	6.94	26.35	30.84	7.75	41.31	2.63
Trial 5	0.05	2.29	6.21	1.17	0.19	13.92	10.2	2.5	20.55	22.47
Trial 6	1.29	0.01	261.48	2.23	11.01	81.32	0	79.75	5.44	195.76
Trial 7	22.88	66.69	0.07	0.18	34.61	13.83	32.99	0.07	1.75	0.21
Trial 8	0	0.19	4.08	3.68	18.3	44.24	0.02	0.02	2.03	264.8
Trial 9	1.19	32.8	0.21	13.49	12.84	6.2	2.97	6.62	3.2	205.89
Trial 10	0.11	7.08	1.72	10.74	1.76	0	3.03	75.39	30.53	99.21
Group4_Activity_CS2
Trial 1	145.37	86.46	437.38	174.79	180.44	92.9	333.63	310.38	307.89	347.25
Trial 2	37.39	11.71	126.1	122.4	10.57	4.58	12.72	69.89	288.18	136.52
Trial 3	0.44	0.66	23.71	7.43	20.28	4.54	1.58	4.39	37.71	123.63
Trial 4	0	85.57	21.33	5.35	3.68	8.26	6.51	1.53	53.83	43.24
Trial 5	6.79	53.09	90.35	14.08	1.14	5.59	24.27	0.19	46.62	300.16
Trial 6	0.01	0	16.91	8.66	49.85	108.49	12.48	61.52	19.69	234.31
Trial 7	8.72	137.05	2.18	7.79	85.79	165.76	0.03	22.58	3.2	276.98
Trial 8	0	82.75	202.15	0.52	301.05	49.8	7.77	0.04	59.06	179.23
Trial 9	1.26	3.22	150.01	221.4	54.14	176.92	177.54	70.31	104.17	391.15
Trial 10	0	104.13	196.85	18.95	219.29	133.02	23.31	113.14	280.1	280.49
Group5_Activity
BL1	318.31	220.54	475.09	225.7	350.94	260.25	390.46	156.12	359.26	257.45
BL2	8.42	140.63	35.31	6.61	3.44	6.33	22.5	2.54	1.9	10.46
Group5_Activity_CS2
Trial 1	216.32	210.66	451.39	130.71	377.69	139.95	377.82	160	423.59	160.46
Trial 2	24.57	41.89	245.68	9.13	21.15	34.53	92.96	0.02	28.94	113.17
Trial 3	0.03	10.36	8.04	24.36	3.89	0.13	69	21.08	0.08	1.62
Trial 4	6.54	5.76	0.32	1.76	0.05	0	0.1	21.05	3.53	0
Trial 5	0.13	20.34	191.4	1.73	0.01	114.26	119.01	0.1	0.01	0.02
Trial 6	1.32	8.39	91.83	0.01	4.26	0.51	0.39	0.73	115.5	0.38
Trial 7	0.54	64.91	244.93	3.8	21.92	0.02	0	4.53	26.43	0.59
Trial 8	0.02	0.07	107.39	0.8	13.09	0	1.79	29.83	2.46	0.06
Trial 9	4.18	16.82	283.42	0	4.56	115.04	0	1.72	0.03	0.66
Trial 10	147.05	36.8	107.68	5	48.93	0.39	1.39	29.53	0.01	0.02
Group5_Activity_CS1
Trial 1	268.99	195.27	540.83	361.59	475.73	209.18	263.47	225.18	271.34	363.7
Trial 2	34.5	42.19	388.92	23.26	107.86	71.16	157.39	0.47	201.73	98.66
Trial 3	4.77	4.72	49.32	8.88	39.68	0.87	7.68	30.18	8.87	0.97
Trial 4	0.54	2.41	23.51	10.6	9.19	0.01	12.03	98.88	5.65	0.95
Trial 5	9.35	19.3	257.72	6.21	0	0.31	1.13	15.76	4.21	8.1
Trial 6	14.13	231.25	131.09	7.75	5.42	26.65	2.25	3.11	171.57	8.83
Trial 7	4.93	271.96	297.81	9.45	10.16	21.76	0.04	64.26	203.82	0.01
Trial 8	0.34	6.73	94.63	13.26	30.24	8.65	0.22	77.73	87.13	5.38
Trial 9	0	21.33	438.61	25.06	25.29	18.29	176.99	53.05	0.7	21.58
Trial 10	31.69	230.79	236.25	2.8	95.45	4.16	214.82	89.88	10.23	1.27
Group6_Activity
BL1	288.01	204.06	450.07	192.82	401.52	248.09	340.91	210.01	367.22	237.14
BL2	31.3	93.25	48.2	12.28	11.34	3.76	5.85	5.1	5.91	8.61
Group6_Activity_CS1
Trial 1	204.15	201.19	464.58	276.74	274.92	215.29	220.14	201.62	203.68	318.43
Trial 2	87.61	133.8	256.52	55.49	296.55	49.27	177.44	50.08	279.61	41.85
Trial 3	30.31	66.9	36.01	16.86	2.35	10.55	29.08	7.65	6.86	1.18
Trial 4	12.69	45.43	13.05	27.28	10.37	0.24	7.09	9.48	3.02	5.37
Trial 5	3.74	2.29	48.95	2.02	8.31	0.09	16.68	5.46	8.07	10.49
Trial 6	31.61	12.93	27.72	7.31	2.02	0.05	1.35	0.23	3.42	4.35
Trial 7	0.03	21.58	8.26	6.24	2.06	0.01	0.03	9.97	4.14	0.58
Trial 8	8.25	75.88	6.34	24.36	7.28	0.02	14.07	0.28	6.48	0.37
Trial 9	1.6	39.95	26.57	95.89	3.32	36.68	0.01	13.51	47.51	2.28
Trial 10	8.43	16.31	0.17	15.74	57.29	0.42	0.03	3.7	11.32	0.62
Group6_Activity_CS2
Trial 1	122.49	294.2	383.32	143.57	491.14	109.69	431.04	114.83	94.3	217.55
Trial 2	88.99	50.81	612.02	41.66	208.32	165.92	86.35	35.39	100.42	12.24
Trial 3	39.05	145.39	33.11	8.65	8.22	9.23	8.68	12.52	0	3.33
Trial 4	98.92	10.09	27.6	24.75	1.41	9.03	24.05	3.57	0.11	0.19
Trial 5	12.6	12.66	2.92	3.82	0.23	27.49	5.93	22.01	5.65	28.88
Trial 6	29.17	63.83	24.74	65.14	3.1	16.43	5.2	1.39	0.96	2.3
Trial 7	0.05	20.66	15.88	9.19	3.14	4.2	7.05	5.92	24.86	2.59
Trial 8	1.51	75.37	14.35	21.23	5.03	5.98	11.77	83.31	0.04	0.03
Trial 9	26.51	97.19	19.18	25.29	1.47	58.3	28	0.54	1.59	0.02
Trial 10	20.19	207.71	14.69	50.5	28.62	2.83	0	17.43	0	0.01
Group4_EscapeScore
Group4_EscapeScore_CS1
Trial 1	-0.94823	0.751878	-0.87987	0.612056	-0.49972	-1.22359	1.57986	0.912433	0.082622	-0.30402
Trial 2	-0.94722	0.2289	-2.69031	-0.09376	-2.39742	-0.10574	-0.0032	-0.94657	-0.54432	0.832422
Trial 3	-0.10584	-0.00703	0.143022	0.221011	0.025144	0.460133	-0.06806	0.061289	-0.2803	-0.92372
Trial 4	0.0031	0.160633	-0.05123	-0.00729	0.053611	0.263067	0.245967	0.077467	-0.72558	-0.03914
Trial 5	0.000433	0.009711	-0.03286	-0.0078	-0.02414	0.139189	0.102033	0.025033	-0.45619	0.165322
Trial 6	-0.01509	-0.01333	2.36682	-0.33028	-0.10344	0.099511	-0.00518	0.591733	-0.28719	1.03119
Trial 7	0.212756	1.66342	-0.61034	-0.16778	0.258611	0.111478	0.3299	-0.03811	-0.02747	-0.00168
Trial 8	-0.00123	-0.14896	0.034789	-0.0897	0.137967	0.331233	0.000167	-0.05672	-0.01581	4.64351
Trial 9	0.011389	0.328022	-0.25913	-0.14619	0.083367	0.060411	0.029722	0.064556	0.027978	4.00728
Trial 10	0.0011	0.000967	0.004944	0.053689	-0.01207	-0.00012	0.026356	0.753122	1.26384	1.85924
Group4_EscapeScore_CS2
Trial 1	-0.88767	-0.66966	0.9919	-0.05304	-1.42319	-0.95842	0.236489	1.31397	0.171789	1.13564
Trial 2	-1.14242	-0.3876	-2.41048	0.822744	-2.54936	-0.55554	-0.61653	-1.38383	0.652811	-0.40948
Trial 3	-0.10318	-0.01287	0.176222	-0.21276	0.044178	-0.04877	-0.09009	-0.04931	-0.3146	-0.70042
Trial 4	0	0.7614	-0.1067	-0.01592	0.021078	0.082167	-0.0056	0.0153	-0.60534	0.366956
Trial 5	0.0678	0.521511	0.804744	0.1213	-0.01458	0.055756	0.242667	0.0019	-0.20692	2.91896
Trial 6	-0.02789	-0.01347	0.917089	-0.26641	0.284822	0.368644	0.119556	0.409267	-0.14539	2.34596
Trial 7	0.071156	2.37116	-0.58924	-0.09351	0.766744	2.63301	0.000267	0.186989	-0.01323	3.76596
Trial 8	-0.00123	0.676478	3.01436	-0.1213	2.95607	0.386733	0.077733	-0.05652	0.553889	2.79194
Trial 9	0.012056	0.032156	2.20837	1.93014	0.496333	1.76284	2.76576	0.701422	1.01918	4.96278
Trial 10	0	1.9705	2.95628	0.136589	3.1361	1.32428	0.228989	1.13216	3.75954	4.67201
Group5_EscapeScore
Group5_EscapeScore_CS2
Trial 1	-0.53014	0.165	0.457056	-0.77271	1.13726	-0.88812	1.06158	-0.03693	1.31996	-0.61406
Trial 2	-1.22387	-0.61751	-1.15234	-0.90983	-1.34878	-0.67084	-0.72323	-0.28148	-1.97417	-0.33869
Trial 3	-0.00147	-0.16764	-0.16277	0.175089	-0.04229	-0.039	0.520022	0.172033	-0.06452	-0.06538
Trial 4	0.007556	0.0052	-0.05679	-0.05563	0.000533	-0.01438	0.000333	0.205689	0.035256	-0.0006
Trial 5	0.002167	0.124556	1.87943	-0.0598	6.67e-05	1.13021	1.18677	0.000956	7.78e-05	-0.01261
Trial 6	-0.01766	-1.21287	0.238044	-0.00257	-0.02786	-0.26313	-0.01287	0.004367	1.12707	-0.18637
Trial 7	0.0044	0.579189	2.37507	0.035467	0.220667	-0.00888	-0.00758	-0.18569	0.2643	0.005933
Trial 8	-0.00701	-0.07117	1.07384	-0.02691	0.127978	-3.3e-05	0.0168	0.294211	-0.02178	-0.03537
Trial 9	0.041756	0.107067	4.92567	-0.00106	0.045578	2.15268	-0.16294	0.017189	-0.00617	-0.03793
Trial 10	1.36813	0.253089	1.07838	0.016344	0.493033	0.003422	0.011678	2.29742	-0.34472	-0.00342
Group5_EscapeScore_CS1
Trial 1	0.042189	-0.01273	1.30452	1.52299	2.00536	-0.22319	-0.03322	0.636467	-0.18398	1.43698
Trial 2	-1.13373	-0.60071	0.234256	-0.76637	-0.48384	-0.30194	-0.06133	-0.27694	-0.2389	-0.48609
Trial 3	0.045933	-0.22351	0.251667	0.022456	0.321078	-0.0316	-0.09311	0.258433	0.023378	-0.07091
Trial 4	-0.05244	-0.0283	0.175144	0.032833	0.091867	-0.01424	0.119633	0.988822	0.056456	0.008867
Trial 5	0.092633	0.122389	2.52203	-0.01497	0	0.000844	0.011233	0.157556	0.042078	0.068122
Trial 6	0.110478	1.027	1.63298	0.0748	-0.01626	-0.002	0.005767	0.028167	1.6717	-0.09933
Trial 7	0.0483	5.64756	3.95207	0.092167	0.0998	0.208622	-0.00718	0.411611	2.03817	6.67e-05
Trial 8	-0.00378	-0.00457	0.946211	0.098189	0.299411	0.086433	0.001133	1.77328	0.825922	0.017867
Trial 9	2.22e-05	0.1534	6.26567	0.249478	0.252811	0.180411	1.60699	1.53046	0.000467	0.1704
Trial 10	0.2207	4.21792	3.35808	-0.00562	0.950767	0.041122	2.14598	2.87752	-0.24256	0.009044
Group6_EscapeScore
Group6_EscapeScore_CS1
Trial 1	0.0322	-0.26652	0.589022	1.35579	-0.55639	0.167656	-1.18116	-0.75742	-2.0514	0.772211
Trial 2	-0.73854	-0.39291	-1.08612	-1.44344	0.307056	-0.25369	-0.79504	-0.48477	1.52061	-0.11782
Trial 3	-0.35579	0.426178	-0.0568	-0.15222	-0.01527	-0.17921	0.0669	0.014144	0.031	0.01
Trial 4	0.090956	0.086633	0.0185	-0.23693	0.103667	-0.08483	0.014478	0.093667	-0.01513	0.053689
Trial 5	0.025678	-0.20066	0.385478	0.0064	-0.00688	0.000511	0.1223	0.053711	0.080722	0.100989
Trial 6	0.287722	-1.12832	0.072656	0.045756	0.001656	-0.01078	0.012856	-0.02242	0.020744	-0.0118
Trial 7	-0.00447	0.067989	0.030467	0.019456	0.016511	-0.11443	0.000222	0.094467	0.003844	0.005533
Trial 8	0.081578	0.514867	0.018144	-0.65957	0.072022	-0.05358	0.076667	0.002689	-0.10414	0.003667
Trial 9	0.014067	0.377633	0.164822	0.924933	-0.00726	0.366744	6.67e-05	0.065233	0.447656	0.003856
Trial 10	0.065733	-0.12644	-0.04466	0.010267	0.5554	-0.00852	-0.00364	0.023222	0.113222	0.006089
Group6_EscapeScore_CS2
Trial 1	-0.799	0.654778	-0.20208	0.048456	1.62468	-0.86328	0.884211	-1.61852	-3.15303	-0.21719
Trial 2	-0.72998	-1.17248	2.48248	-1.58431	-0.54138	0.899311	-1.73151	-0.63427	-0.24659	-0.41859
Trial 3	-0.27376	1.21028	-0.08173	-0.23672	0.0407	-0.18918	-0.1372	0.061611	-0.03753	0.031433
Trial 4	0.943489	-0.26687	0.1639	-0.26663	0.014067	0.0024	0.178944	0.0368	-0.04423	0.001856
Trial 5	0.114311	-0.09689	-0.07482	0.024333	-0.08711	0.274511	0.014733	0.219478	0.056489	0.277422
Trial 6	0.267656	-0.61496	0.043689	0.623722	0.012456	0.153022	0.051389	-0.01082	-0.00382	-0.0323
Trial 7	-0.00423	0.059222	0.106633	0.048922	0.027311	-0.07247	0.070389	0.051867	0.210478	0.025633
Trial 8	0.016044	0.510433	0.098311	-0.69133	0.049489	0.005756	0.0538	0.826656	-0.16864	0.000333
Trial 9	0.267033	0.909167	0.091189	0.218967	-0.02579	0.582911	0.280033	-0.0654	-0.01148	-0.01934
Trial 10	0.1834	1.78702	0.100578	0.372367	0.302	0.015578	-0.00398	0.160522	-1.1e-05	-7.8e-05
Group 4_ToneTest
BL	0	7.30897	0	7.30897	0	15.2824	10.6312	0	0	0
3KHz Tone	57	78	73	62	65.3333	73	88	73	53	71.3333
Group 6_ToneTest
BL	0	0	7.30897	0	0	0	0	0.996678	0	0
3KHz Tone	5	8	6.33333	10	16.3333	55.3333	0	29.3333	10.3333	0

## Sheet: Motion traces_G4
G4_Trial1																G4_Trial10
	Mouse 1	Mouse 2	Mouse 3	Mouse 4	Mouse 5	Mouse 6	Mouse 7	Mouse 8	Mouse 9	Mouse 10							Mouse 1	Mouse 2	Mouse 3	Mouse 4	Mouse 5	Mouse 6	Mouse 7	Mouse 8	Mouse 9	Mouse 10
	526	36	375	366	49	198	1098	27	138	39							0	0	0	0	0	0	0	0	0	0
	371	37	522	342	7	206	1288	53	158	47							0	0	0	0	0	0	0	0	10	0
	229	68	630	316	64	90	1342	100	108	11							0	0	0	0	0	0	0	0	4	0
	64	18	824	171	118	66	1201	103	105	39							0	0	0	0	0	0	0	0	5	0
	122	23	981	125	71	115	883	157	130	112							0	0	0	0	0	0	0	0	0	0
	146	17	881	110	164	24	772	212	21	195							0	0	0	0	0	0	0	0	0	0
	152	29	1172	207	177	147	347	196	6	217							0	0	0	0	0	0	0	0	0	0
	169	14	1138	228	91	141	602	223	47	222							0	0	0	0	0	0	0	0	0	0
	84	9	1106	122	178	64	662	176	10	226							0	0	0	0	4	0	0	0	0	0
	98	5	957	111	73	73	852	131	70	121							0	0	0	0	2	0	0	0	0	0
	85	0	970	107	39	161	731	111	23	163							0	0	0	0	1	0	0	0	0	0
	229	18	801	266	172	197	860	12	3	161							0	0	0	0	1	0	0	0	4	0
	465	162	532	472	104	261	1053	64	25	174							0	0	0	0	0	0	0	0	1	0
	640	213	415	675	137	181	870	39	5	157							0	0	0	0	0	0	0	0	0	0
	829	256	167	522	284	198	921	158	26	147							0	0	0	0	0	0	0	0	0	0
	810	125	725	526	246	224	836	114	10	124							0	0	0	0	0	0	0	0	0	0
	616	135	950	580	308	130	698	86	7	89							0	0	0	0	0	0	4	0	0	0
	453	77	800	444	217	239	429	27	44	77							0	0	0	0	1	0	0	0	4	0
	288	64	511	347	198	363	339	8	42	44							0	0	0	0	0	0	0	0	1	0
	240	57	385	313	142	469	199	8	59	97							0	0	0	0	0	0	1	0	1	0
	187	56	180	151	209	468	197	3	47	80							0	0	0	0	2	0	0	0	0	0
	110	55	444	167	258	354	266	6	13	60							0	0	0	0	0	0	0	0	0	0
	62	111	608	205	290	309	350	2	8	204							0	0	0	0	0	0	2	0	0	0
	62	159	718	214	390	452	483	8	52	128							0	0	0	0	0	0	0	0	0	0
	106	185	619	294	343	304	252	1	92	103							0	0	0	0	0	0	0	0	0	0
	105	241	664	256	412	396	233	30	172	79							0	0	0	0	0	0	0	0	0	0
	71	164	700	193	305	321	517	29	167	113							0	0	0	0	0	0	0	0	0	0
	109	170	750	210	246	202	606	10	207	61							0	0	0	0	0	0	0	0	0	0
	15	119	697	159	239	321	284	0	34	35							0	0	0	0	0	0	0	0	3	0
	11	120	616	80	189	255	103	13	58	158							0	0	0	0	0	0	3	0	2	0
	32	180	525	63	210	364	209	0	63	133							0	0	0	0	0	0	0	0	0	0
	92	200	439	115	228	302	90	10	140	215							0	0	0	0	0	0	0	0	0	0
	33	230	448	211	231	271	314	5	72	192							0	0	0	0	0	0	1	0	0	0
	53	158	545	275	269	176	513	6	106	150							0	0	0	0	0	0	0	0	3	0
	73	128	982	297	370	209	599	29	82	200							0	0	0	0	0	0	0	0	15	0
	148	77	977	271	523	232	558	27	159	226							0	0	0	0	1	0	2	0	5	0
	127	64	1144	331	301	173	566	26	135	181							0	0	0	0	0	0	1	0	0	0
	219	192	1510	390	430	197	569	10	203	166							0	0	0	0	0	0	0	0	0	0
	119	209	1442	291	678	257	472	79	150	127							0	0	0	0	0	0	0	0	0	0
	72	199	985	248	473	214	522	76	114	185							0	0	0	0	0	0	0	0	1	0
	130	136	460	283	454	118	480	226	20	128							0	0	0	0	0	0	0	0	4	0
	56	102	343	330	349	78	454	245	15	143							0	0	0	0	0	0	1	0	1	0
	88	139	627	395	188	175	509	191	17	103							0	0	0	0	0	0	0	0	0	0
	100	199	741	444	75	152	452	191	46	64							0	0	0	0	0	0	0	0	16	0
	43	209	702	387	113	188	352	230	24	31							0	0	0	0	0	0	0	0	2	0
	45	358	621	250	133	206	332	135	11	57							0	0	0	0	0	0	0	0	9	0
	86	351	586	128	176	187	426	136	28	70							0	0	0	0	0	0	0	0	0	0
	14	300	477	186	274	178	484	80	148	169							0	0	0	0	0	0	0	0	0	0
	28	325	379	189	438	79	484	99	387	420							0	0	0	0	0	0	1	0	0	0
	56	354	415	337	378	79	417	146	375	437							0	0	0	0	0	0	0	0	2	0
	11	317	473	499	305	136	365	120	450	354							0	0	0	0	0	0	0	0	0	0
	13	247	714	558	409	159	269	148	483	226							0	0	0	0	0	0	1	0	0	0
	5	335	1188	529	420	193	302	140	517	211							0	0	0	0	0	0	0	0	2	0
	9	444	1457	355	294	225	183	139	501	132							0	0	0	0	0	0	0	0	2	0
	10	456	1480	410	241	262	169	123	484	94							0	0	0	0	0	0	0	0	3	0
	9	383	1377	317	140	242	245	84	497	102							0	0	0	0	0	0	1	0	0	0
	30	369	1167	264	162	156	442	87	434	201							0	0	0	0	0	0	0	0	0	0
	15	470	746	346	616	35	518	104	334	256							0	0	0	0	0	0	0	0	0	0
	12	349	703	384	432	16	410	78	157	364							0	0	0	0	0	0	0	0	0	0
	5	252	332	273	297	94	404	79	266	394							0	0	0	0	0	0	0	0	0	0
	60	300	324	273	237	239	473	85	336	384							0	0	0	0	0	0	0	0	13	0
	87	417	567	200	123	290	617	82	386	412							0	0	0	0	0	0	0	0	0	0
	78	549	509	148	157	304	457	87	330	425							0	0	0	0	0	0	0	0	0	0
	54	642	617	114	109	400	350	58	229	278							0	0	0	0	0	0	0	0	0	0
	29	370	721	325	130	405	294	32	98	299							0	0	0	0	0	0	0	0	0	0
	23	377	632	394	83	373	296	12	159	373							0	0	0	0	0	0	0	0	1	0
	10	474	564	343	53	404	221	11	222	411							0	0	0	0	0	0	1	0	3	0
	10	481	320	308	124	352	150	16	396	433							0	0	0	0	0	0	0	0	2	0
	22	492	151	348	206	314	135	18	355	262							0	0	0	0	0	0	2	0	0	0
	73	502	168	357	260	277	92	54	122	258							0	0	0	0	0	0	0	0	0	0
	274	531	205	300	259	242	89	60	128	268							0	0	0	0	0	0	0	0	0	0
	286	558	91	270	74	257	148	102	133	362							0	0	0	0	0	0	0	0	3	0
	230	537	26	289	33	255	142	52	171	370							0	0	0	0	0	0	0	0	0	0
	166	376	48	223	111	192	70	28	84	392							0	0	0	17	0	0	0	0	2	0
	127	488	43	215	166	123	7	91	263	414							0	0	0	34	0	0	0	0	0	0
	98	498	45	205	51	89	59	74	205	303							0	0	0	19	0	0	3	0	0	0
	92	445	60	252	21	37	50	40	348	305							0	0	0	42	0	0	0	0	0	0
	221	467	10	225	33	23	12	99	314	201							0	0	0	27	0	0	0	0	11	0
	127	429	70	179	46	21	0	152	451	518							0	0	0	2	0	0	0	0	9	0
	23	369	137	92	22	3	23	95	695	671							0	0	0	1	0	0	0	0	0	0
	120	276	114	170	8	10	61	147	656	450							0	0	0	33	2	0	0	0	1	0
	98	413	162	204	38	11	66	194	272	333							0	0	0	42	0	0	0	0	3	0
	34	504	87	243	5	16	11	200	359	447							0	0	0	31	2	0	1	0	5	0
	33	544	64	125	3	38	1	128	360	323							0	0	0	86	0	0	0	0	0	0
	62	306	54	10	46	1	55	71	398	216							0	0	0	67	0	0	0	0	0	0
	65	391	72	10	103	34	68	161	417	312							0	0	0	53	0	0	0	0	0	0
	169	196	63	8	173	4	31	180	244	458							0	0	0	78	1	0	0	0	0	0
	41	319	62	0	114	0	41	197	263	296							0	0	0	143	0	0	0	0	0	0
	57	400	110	19	122	24	71	191	257	266							0	0	0	134	0	0	4	0	3	0
	191	215	15	9	82	0	162	233	290	366							0	0	0	91	0	0	0	0	0	0
	174	157	57	0	52	10	141	226	156	346							0	0	0	124	0	0	4	0	0	0
	68	227	58	1	163	13	157	142	239	226							0	0	0	104	0	0	0	0	0	0
	45	133	60	5	303	1	86	64	164	210							0	0	0	28	0	0	0	0	9	0
	45	126	37	8	234	7	58	72	162	205							0	0	0	15	0	0	2	0	0	0
	84	75	43	5	183	19	121	104	136	90							0	0	0	15	0	0	1	0	1	0
	166	129	44	19	88	13	77	201	69	141							0	0	0	51	0	0	1	0	0	0
	232	159	24	0	123	0	69	171	44	258							0	0	0	42	0	0	0	0	0	0
	368	341	14	0	168	5	50	140	17	221							0	0	0	82	0	0	0	0	0	0
	611	393	26	27	163	0	2	57	25	423							0	0	0	95	0	0	0	0	9	0
	475	227	40	4	236	2	23	33	76	141							0	0	0	10	0	0	3	0	9	0
	304	197	24	19	259	5	90	47	10	225							0	0	0	28	0	0	0	0	0	0
	271	231	137	4	264	1	124	61	26	321							0	0	0	30	0	0	0	0	0	0
	301	88	361	5	243	1	278	36	27	281							0	0	0	30	0	0	2	0	0	0
	387	173	143	60	231	2	425	55	10	225							0	0	0	40	0	0	0	0	11	0
	398	18	91	47	282	10	470	42	56	435							0	0	0	65	0	0	0	0	0	0
	495	58	313	65	344	17	605	79	157	670							0	0	0	69	0	0	0	0	0	0
	483	143	193	11	311	27	627	209	139	841							0	0	0	63	0	0	0	0	0	0
	532	114	122	5	260	46	556	252	130	816							0	0	0	61	0	0	1	0	0	0
	361	163	257	9	314	22	616	471	121	802							0	0	0	63	0	0	0	0	0	0
	504	80	354	1	334	25	542	428	83	909							0	0	0	50	0	0	1	0	11	0
	452	92	230	11	435	47	532	509	75	1023							0	0	0	13	0	0	0	0	2	0
	327	86	275	3	357	37	607	481	82	1018							0	0	0	20	0	0	0	0	0	0
	181	165	440	5	291	5	591	427	17	1027							0	0	0	5	0	0	0	0	0	0
	284	0	370	3	228	31	524	319	35	885							0	0	0	41	0	0	0	0	0	0
	316	95	352	7	411	48	474	201	60	810							0	0	0	52	0	0	3	0	0	0
	128	7	261	33	330	38	439	203	79	875							0	0	0	11	0	0	0	0	19	0
	162	23	216	6	199	18	377	136	43	773							0	0	0	9	0	0	0	0	1	0
	175	354	239	4	162	15	344	197	73	806							0	0	0	12	0	0	0	0	0	0
	160	310	423	22	343	36	281	206	80	1002							0	0	0	55	0	0	0	0	0	0
	127	284	748	0	349	31	306	122	4	1023							0	0	0	30	0	0	0	0	0	0
	168	392	939	0	327	39	247	54	32	1077							0	0	0	23	0	0	0	0	0	0
	84	270	1001	17	274	69	126	46	24	1068							0	0	0	44	0	0	0	0	9	0
	123	269	799	77	611	56	123	6	45	845							0	0	0	22	0	0	0	0	6	0
	97	239	680	49	629	180	59	25	58	893							0	0	0	5	0	0	0	0	0	0
	147	99	750	0	649	173	96	31	54	934							0	0	0	7	0	0	0	0	0	0
	82	136	604	1	552	242	229	26	83	951							0	0	0	17	0	0	0	0	0	0
	117	163	440	6	322	161	262	12	55	894							0	0	1	15	0	0	0	0	0	0
	270	251	511	147	230	151	282	1	15	926							0	0	0	2	0	0	0	0	0	0
	355	255	489	23	195	161	332	6	20	760							0	0	0	7	0	0	0	0	0	0
	441	57	450	19	203	89	406	3	25	720							0	0	0	21	0	0	0	0	0	0
	349	221	552	7	289	145	419	14	50	988							0	0	0	27	0	0	0	0	9	0
	163	135	507	63	388	106	482	46	0	1079							0	0	0	18	0	0	0	0	0	0
	137	274	614	28	275	48	360	147	80	1169							0	0	0	10	0	0	0	0	0	0
	140	226	797	41	138	129	258	175	47	988							0	0	0	39	0	0	1	0	0	0
	124	286	884	0	127	219	300	234	22	829							0	0	0	49	0	0	0	0	0	0
	154	299	901	16	112	160	261	206	79	1033							0	0	0	30	0	0	0	0	0	0
	241	198	762	2	133	112	176	232	1	1097							0	0	0	38	0	0	0	0	2	0
	231	280	736	0	103	190	165	270	88	1020							0	0	0	24	0	0	0	0	0	0
	184	435	859	8	43	139	186	346	39	816							0	0	0	40	0	0	0	0	2	0
	67	356	795	2	5	128	224	382	31	826							0	0	0	42	0	0	0	0	0	0
	107	508	825	14	54	179	266	263	39	999							0	0	0	22	0	0	1	0	0	0
	175	519	886	13	94	103	265	304	75	723							0	0	0	59	0	0	0	0	0	0
	114	358	719	23	120	146	349	346	53	766							0	0	0	70	0	0	0	0	0	0
	90	394	493	38	113	11	280	426	75	557							0	0	0	24	0	0	1	0	7	0
	179	313	575	28	129	158	399	420	9	499							0	0	0	43	0	0	0	0	11	0
	125	248	831	42	73	168	137	328	28	229							0	0	0	15	0	0	0	0	0	0
	170	252	1119	51	56	184	180	281	83	230							0	0	0	0	0	0	1	0	0	0
	223	327	1492	67	101	204	140	385	71	368							0	0	0	1	0	0	0	0	0	0
	280	349	1431	102	101	190	199	407	64	287							0	0	0	9	0	0	0	0	0	0
	277	383	1121	201	16	216	133	345	86	139							0	0	0	29	0	0	0	0	0	0
	264	504	1054	255	92	141	96	261	69	94							0	0	0	14	0	0	0	0	1	0
	90	482	989	258	82	21	263	255	27	155							0	0	0	24	0	0	1	0	0	0
	230	515	644	417	34	47	357	141	55	173							0	0	0	3	0	0	0	0	0	0
	174	558	521	354	90	96	285	83	42	181							0	0	0	0	0	0	1	0	0	0
	156	533	520	347	70	149	248	85	89	247							0	0	0	1	0	0	0	0	4	0
	123	462	522	313	97	233	216	171	59	28							0	0	0	0	0	0	0	0	0	0
	119	304	544	243	92	126	208	226	39	257							0	0	0	1	0	0	1	0	0	0
	190	349	206	320	159	114	376	202	26	57							0	0	0	0	0	0	1	0	0	0
	308	434	453	269	81	170	157	126	4	103							0	0	0	0	0	0	0	0	0	0
	387	376	839	217	33	147	196	41	19	71							0	0	0	0	0	0	0	0	0	0
	474	364	516	263	80	164	224	18	65	175							0	0	0	0	0	0	1	0	0	0
	490	307	285	293	107	73	253	34	54	122							0	0	0	0	0	0	0	0	5	0
	329	447	431	189	20	200	206	46	5	41							0	0	0	0	0	0	0	0	0	0
	321	509	226	113	99	28	180	61	70	118							0	0	0	0	0	0	3	0	0	0
	356	505	148	51	161	3	237	69	80	127							0	0	0	0	0	0	0	0	0	0
	360	437	104	42	211	13	196	133	68	125							0	0	0	0	0	0	0	0	0	0
	196	427	184	140	164	38	135	102	53	43							0	0	0	1	0	0	0	0	7	0
	157	448	208	279	85	276	131	141	6	33							0	0	0	1	0	0	3	0	1	0
	119	513	198	383	217	479	280	164	9	190							0	0	0	0	0	0	0	0	0	0
	81	401	238	401	491	456	222	104	53	54							0	0	0	0	0	0	0	0	0	0
	114	247	157	511	254	328	127	160	48	185							0	0	0	0	0	0	0	0	0	0
	55	188	200	415	324	266	198	140	48	141							0	0	0	0	0	0	0	0	1	0
	24	282	490	305	377	253	260	72	86	42							0	0	0	0	0	0	1	0	3	0
	18	206	496	284	379	300	248	56	66	77							0	0	0	0	0	0	0	0	8	0
	75	69	453	472	328	290	349	102	61	16							0	0	0	3	0	0	0	0	0	0
	103	145	180	454	332	258	338	119	33	122							0	0	0	0	0	0	1	0	5	0
	274	255	240	230	467	227	161	105	54	45							0	0	0	0	0	0	0	0	0	0
	159	256	134	196	573	173	293	176	110	203							0	0	0	1	0	0	0	0	3	0
	205	176	410	146	820	122	304	112	122	237							0	0	0	0	0	0	0	0	7	0
	187	156	492	61	757	109	252	137	27	388							0	0	0	0	0	0	0	0	2	0
	111	189	486	37	741	113	282	227	47	184							0	0	0	0	0	0	0	0	0	0
	158	371	468	166	837	88	326	84	71	441							0	0	0	0	0	0	0	0	0	0
	118	312	479	189	920	191	447	231	23	543							0	0	0	0	0	0	1	0	0	0
	36	283	406	105	839	216	465	295	24	482							0	0	0	0	0	0	0	0	2	0
	55	236	187	139	985	223	239	231	3	632							0	0	0	0	0	0	0	0	0	0
	85	256	312	161	973	245	334	228	19	720							0	0	0	0	0	0	0	0	0	0
	100	245	353	162	878	223	378	140	13	494							0	0	0	0	0	0	0	0	0	0
	90	349	211	55	782	304	363	146	16	853							0	0	0	0	0	0	0	0	1	0
	163	367	161	21	795	286	439	183	86	828							0	0	0	0	0	0	0	0	14	0
	231	312	463	41	726	262	670	204	24	553							0	0	0	0	0	0	0	0	2	0
	244	203	317	52	704	258	555	270	33	117							0	0	0	0	0	0	0	0	0	0
	273	169	261	85	445	206	257	306	6	130							0	0	0	0	0	0	3	0	0	0
	301	224	529	66	389	123	462	285	9	320							0	0	0	0	0	0	0	0	0	0
	383	452	333	62	459	93	458	251	0	458							0	0	0	0	0	0	0	0	0	0
	296	384	207	18	200	147	116	318	28	314							0	0	0	0	0	0	0	0	0	0
	231	384	35	8	220	209	139	351	4	242							0	0	0	0	0	0	0	0	0	0
	172	444	193	8	163	256	74	311	45	240							0	0	0	0	0	0	0	0	0	0
	153	714	504	0	171	308	339	337	28	222							0	0	0	0	0	0	1	0	0	0
	203	684	391	5	394	364	446	220	0	187							0	0	0	0	0	0	0	0	0	0
	307	601	496	12	760	293	269	134	1	162							0	0	0	0	0	0	1	0	1	0
	176	497	561	11	1122	256	302	64	0	345							0	0	0	0	0	0	0	0	0	0
	55	460	821	8	1155	179	558	138	15	242							0	0	0	0	0	0	0	0	2	0
	264	614	648	2	1165	79	626	222	14	166							0	0	0	0	0	0	2	0	0	0
	302	569	473	0	1114	146	362	238	39	87							0	0	0	0	0	0	0	0	0	0
	96	530	490	11	975	172	462	217	33	285							0	0	0	0	0	0	0	0	0	0
	137	471	565	13	904	154	576	89	7	328							0	0	0	0	0	0	0	0	0	0
	201	467	602	50	741	185	480	126	26	578							0	0	0	0	0	0	2	0	0	0
	84	447	594	90	706	225	297	183	23	687							0	0	0	0	0	0	0	0	0	0
	157	340	266	85	578	190	155	162	6	419							0	0	0	0	0	0	0	0	0	0
	181	276	387	119	551	105	225	157	4	65							0	0	0	0	0	0	1	0	0	0
	267	280	296	142	317	100	122	121	0	51							0	0	0	0	0	0	0	0	0	0
	271	245	383	156	186	79	516	212	19	212							0	0	0	0	0	0	0	0	0	0
	281	240	446	92	195	28	629	82	6	249							0	0	0	0	0	0	0	0	0	0
	414	356	398	174	87	28	570	100	6	264							0	0	0	0	0	0	0	0	0	0
	406	142	374	217	166	70	526	163	2	275							0	3	0	0	0	0	0	0	11	0
	286	136	328	215	209	75	516	155	0	507							0	9	0	0	0	0	0	0	3	0
	146	61	334	226	361	27	582	42	7	501							0	0	0	0	0	0	2	0	0	0
	140	203	394	148	350	27	615	81	6	247							0	0	0	1	0	0	0	0	0	0
	96	265	379	228	361	60	530	66	0	575							0	1	0	7	0	0	0	0	0	0
	214	381	484	150	196	21	381	24	3	515							0	0	0	0	0	0	0	0	5	0
	134	494	719	71	133	14	478	38	3	598							0	0	5	0	1	0	0	0	1	0
	123	439	649	88	72	4	410	100	0	668							0	0	0	27	0	0	0	0	0	0
	185	265	813	19	201	30	491	47	0	812							0	1	0	59	0	0	0	0	0	0
	235	269	691	11	178	42	407	61	0	806							0	0	0	38	0	0	0	0	8	0
	81	119	599	87	23	5	342	17	15	542							0	0	0	43	0	0	0	0	6	0
	63	120	362	146	55	64	581	43	7	473							0	0	0	30	0	0	1	0	2	0
	268	63	311	127	192	46	597	50	2	507							0	2	0	38	0	0	0	0	1	0
	146	110	232	174	217	21	525	79	0	656							0	39	0	50	0	0	0	0	24	0
	85	270	275	140	209	64	416	111	0	637							0	6	0	49	0	0	1	0	4	0
	64	147	243	159	225	36	453	115	0	587							0	0	0	9	0	0	3	0	2	0
	243	512	93	273	193	0	405	150	0	448							0	0	0	6	0	0	0	0	20	0
	370	674	110	353	266	14	367	179	10	553							0	0	0	20	0	0	0	0	7	0
	446	631	147	416	288	3	495	299	4	564							0	0	0	16	0	0	1	0	21	0
	448	497	260	405	136	3	520	406	0	485							0	0	0	25	0	1	0	0	42	0
	526	314	531	489	73	11	416	422	1	362							0	24	0	45	0	1	0	0	11	0
	476	428	667	323	101	31	316	383	0	437							0	17	0	34	0	3	0	0	16	0
	484	554	790	483	19	34	277	419	0	424							0	3	0	20	0	0	1	0	4	0
	429	475	955	486	57	54	322	368	3	393							0	2	0	36	0	0	0	0	2	1
	372	449	1209	534	124	90	273	327	4	335							0	9	1	16	0	0	0	0	7	0
	440	351	602	473	97	113	362	305	0	328							0	31	0	25	0	0	0	0	12	0
	557	304	400	419	312	101	365	513	6	264							0	40	0	32	0	0	0	0	1	0
	583	375	315	317	429	208	189	559	4	174							0	15	0	19	0	0	1	0	0	0
	584	206	372	158	421	144	181	561	6	228							0	2	0	13	0	1	1	0	0	0
	781	126	361	139	469	113	174	625	7	297							0	1	0	16	0	0	0	0	6	0
	882	81	480	142	400	128	152	613	0	285							0	11	0	12	0	0	0	0	22	0
	739	49	219	112	342	130	225	617	5	213							0	6	0	19	0	0	0	0	1	0
	693	174	171	93	322	123	150	565	14	249							0	15	0	33	0	0	0	0	7	0
	558	35	89	95	284	198	274	516	7	307							0	19	0	2	0	0	0	0	0	0
	503	65	151	91	288	295	315	775	0	178							0	43	0	24	0	0	1	0	0	0
	595	238	331	50	174	300	630	697	6	196							0	24	0	32	0	0	0	0	0	0
	757	79	145	87	266	234	857	720	0	161							0	18	1	25	0	0	0	0	1	0
	775	129	325	170	431	208	759	632	36	259							0	12	1	16	0	0	1	0	1	0
	738	149	445	144	675	207	342	647	17	195							0	2	1	13	0	0	0	0	3	0
	646	64	276	212	570	143	171	514	15	116							0	6	0	15	0	0	0	0	11	0
	551	169	166	251	460	36	234	363	3	241							0	4	0	85	0	0	0	0	12	0
	612	123	340	157	216	78	581	192	14	258							0	0	2	160	0	1	0	0	27	0
	517	72	119	172	280	48	336	481	4	199							0	0	0	87	0	0	0	0	59	0
	156	281	213	194	130	45	821	468	3	201							0	3	0	30	0	0	0	0	45	0
	163	374	378	86	351	20	423	456	12	200							0	24	0	24	0	0	0	0	18	0
	224	326	429	62	466	62	739	404	4	211							0	79	0	6	0	0	0	0	8	0
	222	602	460	34	534	111	388	240	4	174							0	93	1	0	0	0	0	0	8	0
	115	1015	670	118	524	141	560	172	19	146							0	43	0	1	0	0	3	0	4	0
	43	1067	706	79	528	245	342	184	51	99							0	18	0	3	0	0	0	0	18	0
	37	1044	656	123	332	225	209	150	11	54							0	27	0	10	0	0	0	0	19	0
	49	765	595	34	337	215	300	312	54	38							0	8	0	3	0	0	0	0	0	0
	69	1075	799	28	322	150	280	349	68	221							0	1	0	3	0	0	0	0	2	0
	141	1250	546	65	281	61	244	143	10	347							0	5	0	5	0	0	0	0	12	0
	27	813	542	206	337	9	250	109	50	292							0	0	0	3	0	0	0	0	0	0
	161	455	281	486	319	7	342	88	9	217							0	0	0	1	0	0	3	0	5	0
	225	381	511	645	404	56	231	74	12	230							0	0	0	1	0	0	0	0	6	0
	181	222	603	701	543	43	246	124	55	106							0	0	0	10	0	0	0	0	8	0
	113	162	447	701	724	205	317	121	22	43							0	2	0	32	0	0	0	0	1	0
	61	50	361	601	792	362	274	130	57	17							0	1	0	9	0	0	0	0	0	0
	59	77	356	502	652	428	236	150	13	16							0	17	0	24	0	0	0	0	1	0
	34	43	440	495	886	466	145	142	41	18							0	0	0	7	0	0	0	0	5	0
	23	64	402	387	731	461	183	66	22	33							0	0	0	0	0	0	1	0	0	0
	218	131	360	125	723	238	64	55	51	51							0	0	0	1	0	0	0	0	0	0
	200	93	325	89	530	153	39	222	37	79							0	37	0	1	0	0	0	0	0	0
	123	114	374	77	496	194	184	134	64	129							0	0	0	0	0	0	0	0	0	0
	252	66	392	65	428	205	245	292	21	264							0	23	0	0	0	0	0	0	0	0
	115	94	435	166	414	195	322	291	34	423							0	0	0	0	0	0	0	0	0	0
	110	79	557	214	445	187	404	102	119	503							0	1	0	3	0	0	2	0	0	0
	118	91	352	337	499	109	196	229	29	444							0	1	0	1	0	0	1	0	2	0
	173	121	308	395	282	105	182	141	64	482							0	7	0	0	0	0	0	0	1	0
	279	84	149	304	200	17	149	92	155	464							0	12	0	6	0	0	0	0	0	0
	310	47	291	172	146	16	131	247	70	541							0	37	0	5	0	0	0	0	1	0
	360	81	259	108	164	21	253	140	16	620							0	0	0	0	0	0	0	0	0	0
	305	102	132	74	137	34	235	141	64	505							0	0	0	0	0	0	1	0	0	0
	330	76	94	108	235	31	223	281	24	411							0	0	0	0	0	0	0	0	0	0
	356	116	66	77	123	11	222	159	2	474							0	0	0	0	0	0	0	0	0	0
	328	130	72	50	396	14	203	232	35	410							0	49	0	0	0	0	0	0	0	0
	360	121	155	24	233	3	179	233	4	372							0	0	0	0	0	0	0	0	1	0
	394	167	127	35	206	7	157	292	4	221							0	0	0	1	0	0	0	0	4	0
	174	262	143	63	80	9	157	282	10	249							0	1	0	12	0	0	0	0	0	0
	129	364	162	33	63	11	281	314	7	288							0	18	0	35	0	0	1	0	0	0
	61	423	347	93	164	29	226	423	55	203							0	0	0	40	0	0	0	0	0	0
	153	474	400	68	68	41	254	477	19	403							0	0	0	17	0	0	0	0	0	0
	105	468	291	115	64	6	255	102	8	314							0	5	0	12	0	0	0	0	9	0
	282	290	141	103	59	11	336	205	7	109							0	18	0	2	0	0	0	0	2	0
	237	344	152	93	75	46	86	401	52	56							0	28	0	18	0	0	5	0	0	0
	180	678	172	84	192	119	248	366	0	222							0	1	0	15	0	0	0	0	0	0
	141	702	97	59	54	85	244	230	0	285							0	0	0	23	0	0	4	0	0	0
	242	866	204	55	69	43	197	74	3	235							0	0	0	17	0	0	0	0	0	0
	151	899	150	14	124	21	217	38	4	299							0	0	0	27	0	0	0	0	0	0
	381	741	122	5	72	44	133	134	0	259							0	1	0	19	0	0	1	0	1	0
	334	576	157	19	52	40	530	10	1	214							0	42	11	3	0	0	2	0	1	0
	270	452	176	21	89	10	601	65	0	200							0	21	1	14	0	0	3	0	2	0
	208	526	188	18	63	0	526	90	0	237							0	3	0	5	0	0	0	0	1	0
	285	455	184	25	118	5	484	36	0	216							0	0	0	1	0	0	3	0	0	0
	292	402	250	53	51	16	563	83	4	253							0	3	1	8	0	0	0	0	0	0
	301	474	239	67	142	15	500	38	0	350							0	0	0	1	0	0	0	0	0	0
	174	452	378	39	497	17	435	62	2	382							0	0	0	0	0	0	3	0	0	0
	153	439	415	58	534	33	466	75	0	420							0	0	0	0	0	0	0	0	0	0
	134	700	441	93	667	102	682	73	0	383							0	0	0	0	0	0	4	0	0	0
	130	704	544	95	605	36	796	101	0	487							0	0	0	0	0	0	0	0	0	0
	158	607	519	164	512	17	833	34	1	356							0	0	0	0	0	0	1	0	0	0
	72	585	438	202	345	35	865	8	0	220							0	0	0	0	0	0	0	0	0	0
	55	426	386	199	451	38	734	54	0	218							0	0	0	0	0	0	0	0	0	0
	85	250	341	301	556	3	664	22	0	230							0	4	4	0	0	0	3	0	1	0
	98	282	344	202	456	14	598	22	1	146							0	62	5	0	14	0	114	0	6	0
	67	359	232	219	324	0	309	24	0	90							0	13	5	1	6	0	144	5	3	0
	92	359	181	121	95	2	374	23	0	161							1	3	7	0	4	0	120	1	8	0
	22	268	122	237	150	0	291	7	0	98							0	2	2	0	1	0	69	15	4	0
	92	345	102	64	65	0	243	56	0	151							0	2	1	0	20	0	30	35	0	0
	27	182	1	62	44	1	378	18	0	59							0	21	4	0	0	0	15	43	0	0
	24	87	0	42	652	0	232	54	15	62							0	25	3	0	7	0	45	99	0	0
	61	200	5	65	629	0	198	136	8	149							0	41	1	0	1	0	17	46	0	0
	59	185	27	34	751	10	92	37	1	95							0	7	0	0	0	0	48	101	0	0
	77	306	0	60	588	6	137	1	2	7							0	1	0	0	1	0	54	2	0	0
	66	147	42	53	344	9	230	26	0	28							0	7	0	0	0	0	3	106	1	0
	65	201	21	56	171	1	431	20	0	12							0	1	0	0	0	0	10	247	0	0
	42	197	44	42	201	3	652	106	0	21							0	0	0	0	0	0	48	233	0	0
	61	52	234	120	201	0	788	79	0	78							0	0	0	0	1	0	27	174	0	0
	120	116	237	99	186	0	1119	105	0	40							0	0	0	0	0	0	33	70	0	0
	136	230	297	104	466	16	1669	42	0	88							0	0	0	0	0	0	3	147	0	0
	248	102	374	91	570	65	1545	179	0	49							0	0	0	0	0	0	10	213	0	0
	46	149	328	86	485	56	973	130	1	44							0	3	1	0	0	0	3	152	0	0
	65	159	195	91	434	55	1425	98	0	36							0	1	8	10	0	0	0	157	0	0
	27	83	307	100	512	66	817	245	0	100							0	1	2	0	0	0	3	181	0	0
	67	50	359	76	709	77	1003	140	1	10							0	0	10	0	0	0	19	203	0	0
	134	69	234	29	813	84	931	155	1	16							0	0	54	0	0	0	5	212	0	0
	19	4	293	24	946	112	1009	125	3	14							0	0	117	0	0	0	9	212	0	0
	119	41	274	142	700	31	924	6	1	63							0	0	71	0	0	0	0	224	0	0
	128	24	190	140	795	45	494	168	0	75							0	0	14	0	0	0	4	156	0	0
	19	6	15	150	709	59	304	219	0	58							0	0	9	0	0	0	2	96	0	0
	63	100	39	168	762	85	263	336	3	192							0	0	1	0	0	0	0	23	0	0
	36	249	123	178	627	118	378	467	24	215							0	0	0	0	0	0	2	144	0	0
	59	271	146	174	706	277	220	488	43	190							0	0	5	0	0	0	9	53	0	0
	120	330	140	147	400	146	489	454	53	314							0	0	3	0	0	0	12	203	0	0
	122	315	61	208	594	182	780	381	44	230							0	0	18	0	0	0	17	358	0	90
	65	202	36	271	727	48	1088	485	26	74							0	0	9	0	1	0	6	377	0	188
	75	198	56	233	780	40	911	414	7	23							0	1	10	0	0	0	2	849	10	250
	5	107	48	215	573	53	558	312	7	10							0	0	3	2	0	0	1	998	19	75
	125	310	80	252	557	90	522	176	12	48							0	0	0	19	0	0	0	866	2	46
	72	357	35	212	395	68	664	340	14	113							6	0	1	58	0	0	0	688	4	85
	208	408	19	309	349	31	577	248	20	130							4	0	0	49	0	0	0	425	3	68
	148	616	25	156	592	15	548	258	16	61							0	0	1	29	0	0	1	266	1	43
	94	565	2	193	252	30	287	187	3	15							0	0	0	8	0	0	0	363	4	141
	126	398	41	231	421	39	108	182	4	68							0	0	0	5	0	0	0	401	8	238
	50	510	212	245	344	9	98	311	0	50							0	0	0	19	0	0	0	197	4	114
	99	566	287	373	470	19	336	385	13	23							0	0	0	3	0	0	0	37	0	66
	67	511	175	341	416	51	442	325	2	80							2	0	0	14	0	0	0	64	0	81
	173	565	129	342	218	69	258	302	7	54							0	0	0	5	0	0	0	76	167	124
	79	669	189	486	169	104	332	408	2	9							0	0	0	3	0	0	0	151	924	146
	309	711	161	427	127	100	380	389	0	12							0	0	0	1	0	0	0	136	404	196
	265	692	65	387	85	72	585	397	5	23							0	0	0	0	0	0	0	216	579	338
	74	707	58	365	64	78	539	407	15	19							0	0	0	0	0	0	1	265	377	409
	135	503	68	181	33	121	456	294	14	19							0	0	0	6	0	0	0	362	115	476
	63	712	152	249	24	112	144	360	19	23							0	0	0	5	0	0	0	380	129	488
	167	665	217	259	4	108	408	281	71	29							0	0	0	1	0	0	0	397	143	594
	60	568	343	235	14	138	335	301	83	10							0	0	0	0	0	0	0	380	116	425
	9	538	453	212	15	131	675	139	141	15							0	0	0	0	0	0	0	239	91	302
	76	529	447	241	30	61	642	88	192	36							0	0	0	0	0	0	0	168	67	427
	147	526	340	297	21	57	533	115	399	43							0	0	0	0	0	0	0	70	35	585
	68	219	270	210	17	72	725	93	499	20							0	0	0	0	0	0	0	244	94	536
	60	247	177	157	89	34	750	92	255	34							0	0	0	0	0	0	0	198	207	758
	92	266	43	130	63	24	754	151	333	14							0	0	0	0	0	0	0	114	218	1109
	40	249	75	130	56	82	684	54	175	73							0	0	0	0	0	0	0	156	173	1183
	76	121	212	135	55	52	537	27	350	57							0	0	0	0	0	0	0	135	361	616
	48	121	299	176	124	44	552	52	284	20							0	10	0	1	0	0	0	207	621	417
	46	80	305	261	202	12	319	34	372	37							0	21	0	12	0	0	0	110	600	329
	55	52	126	377	250	24	293	48	366	42							0	111	0	0	1	0	0	254	678	439
	34	45	29	168	242	20	445	33	371	27							0	140	0	1	0	0	0	184	787	501
	36	25	50	35	99	67	451	38	339	55							0	60	0	0	0	0	0	69	448	472
	24	87	23	50	125	116	625	13	301	58							4	25	0	3	0	0	0	60	263	703
	40	59	0	77	63	113	348	8	203	49							2	14	0	0	0	0	0	74	259	934
	2	58	1	97	41	57	354	11	35	52							0	1	1	0	0	0	0	122	104	1073
	67	127	0	9	59	46	551	149	127	48							0	6	0	0	0	0	0	64	120	1069
	63	202	1	5	101	31	571	235	45	102							1	45	4	1	0	0	0	72	137	1358
	75	171	1	34	28	20	515	127	2	43							0	74	3	0	0	0	0	33	160	1633
	29	436	0	6	25	26	276	110	85	50							0	88	0	0	0	0	0	67	76	1862
	20	913	0	7	63	69	201	87	260	22							1	44	0	0	0	0	0	121	52	1395
	21	1231	0	42	95	105	172	106	385	46							0	10	0	0	0	0	0	63	53	1410
	30	1225	327	10	112	76	169	112	335	26							0	15	0	0	35	0	0	119	63	1511
	38	1008	445	44	65	49	258	12	236	40							0	46	0	0	90	0	0	59	43	1079
	31	890	212	12	34	93	195	7	110	16							0	4	0	0	74	0	0	61	37	510
	53	648	270	23	56	35	298	17	104	89							0	55	0	0	45	0	0	26	1	144
	113	455	230	49	29	19	329	123	61	52							0	24	0	0	26	0	0	71	2	234
	152	361	125	41	8	77	563	124	35	73							0	13	0	0	17	0	0	57	5	203
	166	371	70	5	5	61	435	204	96	69							0	5	0	0	7	0	0	7	0	127
	100	421	223	25	6	48	369	185	199	10							0	3	0	0	1	0	0	11	3	125
	14	294	300	45	50	34	660	48	146	19							0	4	0	0	6	0	0	20	0	76
	84	322	332	13	49	9	741	136	84	20							0	5	0	0	6	0	0	36	0	83
	183	380	285	19	43	32	489	144	211	21							0	0	0	0	5	0	0	20	8	117
	179	311	300	22	30	15	238	129	308	23							0	4	0	0	4	0	0	59	2	136
	180	216	280	66	45	9	332	230	259	23							0	21	0	0	2	0	0	12	4	66
	38	176	315	18	17	77	278	217	175	70							0	12	0	0	7	0	0	43	4	87
	60	75	318	49	71	221	220	285	50	40							0	42	0	0	2	0	0	8	0	12
	68	127	456	5	33	161	201	349	92	40							0	0	0	0	6	0	0	2	1	17
	162	114	484	37	60	86	412	382	131	45							0	5	0	0	11	0	0	42	2	15
	150	118	651	2	103	92	302	250	148	41							0	0	0	0	26	0	0	131	6	6
	68	52	660	7	137	84	183	325	126	33							0	37	0	1	13	0	0	82	0	1
	35	32	663	2	156	81	289	592	42	85							0	16	0	24	6	0	0	70	4	4
	129	46	791	17	177	90	246	524	75	117							0	13	0	106	0	0	0	148	25	0
	147	6	828	12	143	60	83	260	63	25							0	46	0	100	0	0	0	40	0	1
	315	8	786	105	138	65	36	396	56	75							0	88	0	79	0	0	0	93	17	1
	235	19	953	99	232	68	75	147	110	126							0	118	0	56	0	0	0	122	0	0
	212	205	939	56	291	102	305	385	481	63							0	111	0	42	15	0	0	120	0	0
	161	235	767	90	267	106	232	227	780	100							0	63	0	34	0	0	0	15	0	0
	169	271	659	98	241	109	308	418	962	115							0	61	0	37	1	0	0	31	2	0
	155	203	429	276	265	91	415	289	644	164							0	25	0	6	0	0	0	31	5	0
	286	102	379	249	140	58	433	281	439	121							0	72	0	0	0	0	0	83	2	0
	433	53	189	213	148	33	401	193	248	85							0	8	0	9	0	0	0	124	0	0
	460	71	81	294	339	7	324	136	220	25							0	7	0	136	0	0	0	2	0	0
	338	79	145	511	288	13	248	278	366	77							0	4	0	79	0	0	0	12	0	0
	292	187	74	589	368	0	214	157	391	70							0	10	0	49	0	0	0	105	0	1
	241	167	79	533	404	0	175	126	382	98							0	13	0	111	5	0	0	78	1	1
	251	235	135	388	421	0	126	335	437	171							0	2	0	98	2	0	0	29	1	3
	306	289	248	262	449	99	303	298	571	122							0	18	0	65	0	0	0	6	0	0
	199	117	236	367	332	198	656	168	600	217							0	4	0	49	0	0	0	2	0	0
	123	118	222	491	155	262	759	325	427	258							0	3	0	60	0	0	0	3	0	1
	162	52	210	648	268	235	822	347	375	131							0	6	0	32	0	0	0	14	0	0
	197	53	103	946	250	185	458	496	388	321							0	9	0	39	0	0	0	8	3	0
	203	24	13	472	345	75	452	456	366	273							0	0	0	38	0	0	0	13	0	0
	204	20	71	464	429	60	689	372	283	373							0	0	0	18	0	0	0	36	1	0
	413	26	138	39	461	34	626	625	369	275							0	1	0	7	0	0	0	32	0	0
	356	6	213	211	553	71	644	788	445	230							0	0	0	10	0	0	0	68	0	0
	199	53	322	289	456	30	894	785	518	269							0	0	0	13	0	0	0	1	0	0
	177	12	241	484	374	41	730	670	425	301							0	12	0	36	0	0	0	3	0	34
	184	11	277	818	346	16	836	376	338	283							0	37	0	35	8	0	0	7	2	143
	179	26	214	746	312	9	555	227	432	251							0	51	1	39	9	0	0	2	5	9
	132	12	146	741	191	29	692	60	502	130							0	42	0	26	0	0	0	15	7	5
	72	17	131	624	149	24	651	66	541	89							0	33	0	17	0	0	0	13	10	22
	86	0	33	499	69	12	418	120	748	50							0	11	0	3	0	0	0	24	0	30
	143	0	18	536	66	9	550	191	447	36							0	1	0	32	0	0	0	21	7	2
	147	1	32	561	180	8	459	298	586	63							0	1	0	58	0	0	0	0	0	7
	204	0	1	439	423	16	536	333	586	71							0	1	0	59	0	0	0	1	1	0
	184	0	3	474	718	33	513	415	528	61							0	8	0	62	0	0	0	22	0	1
	198	0	52	270	807	45	348	465	367	82							0	4	0	32	1	0	0	29	2	1
	357	2	124	119	633	9	573	303	361	149							0	0	0	56	0	0	0	0	5	0
	426	0	194	165	578	128	359	369	378	145							0	2	0	76	0	0	0	1	0	0
	376	0	236	220	490	3	388	418	317	112							0	0	0	75	0	0	0	0	0	0
	215	0	385	411	358	10	676	455	290	136							0	0	0	55	0	0	0	0	0	0
	190	0	319	631	327	74	732	447	299	90							0	0	0	37	0	0	0	0	0	0
	208	0	347	585	209	33	608	362	392	56							0	0	0	115	0	0	0	1	0	0
	198	1	517	392	95	50	747	505	318	79							0	0	0	31	0	0	0	0	0	2
	154	0	592	244	83	1	618	541	278	35							0	1	0	47	0	0	0	0	0	1
	69	0	751	204	22	4	533	592	353	87							0	0	0	31	0	0	0	0	0	0
	132	0	898	125	31	8	601	584	274	144							0	0	0	16	0	0	0	0	0	0
	218	1	950	175	12	13	780	580	212	77							0	0	0	7	0	0	0	0	0	0
	214	4	970	71	58	3	869	475	283	69							0	0	0	3	0	0	0	0	0	0
	195	164	959	132	67	2	889	389	465	80							0	0	0	12	0	0	0	0	0	0
	164	93	1021	213	109	0	374	400	410	167							0	0	0	7	0	0	0	0	0	2
	110	193	1015	721	141	1	327	490	300	96							0	0	0	1	0	0	0	4	0	0
	124	100	1118	1283	98	63	331	602	235	16							0	0	0	2	0	0	0	1	0	0
	46	25	1042	1173	121	14	527	570	234	78							0	0	0	1	0	0	0	0	0	0
	53	37	895	821	115	4	566	634	214	312							0	0	0	0	0	0	0	3	0	0
	29	63	885	1004	75	103	533	578	237	542							0	0	0	0	0	0	0	7	0	0
	33	75	760	865	103	106	551	559	235	702							0	0	1	0	0	0	0	1	0	0
	27	21	509	610	183	60	505	598	285	714							0	0	0	0	0	0	0	2	0	0
	1	6	578	513	255	60	205	591	221	608							0	1	1	0	0	0	0	3	0	0
	24	61	432	682	334	63	266	394	380	373							0	0	23	0	0	0	0	6	0	0
	31	115	481	752	296	54	471	316	361	281							0	1	6	0	0	0	0	4	0	0
	143	69	529	576	293	26	728	537	331	187							0	0	3	0	1	0	0	0	0	0
	507	98	666	429	270	142	679	690	171	178							0	0	2	0	0	0	0	1	0	0
	898	209	626	325	236	178	404	342	264	153							0	0	0	0	0	0	0	0	0	0
	1074	171	674	302	125	157	262	183	222	220							0	0	0	0	0	0	0	0	0	0
	798	228	681	344	163	102	264	221	170	208							0	0	0	0	0	0	0	1	0	0
	588	22	876	347	230	66	397	143	253	191							0	0	0	0	0	0	0	1	0	0
	403	114	859	352	161	88	438	108	279	262							0	0	1	0	0	0	0	0	0	0
	265	4	844	382	151	81	612	107	313	320							0	0	0	0	0	0	0	2	0	0
	138	12	847	371	123	100	555	106	279	377							0	0	0	0	0	0	0	73	0	0
	141	154	1014	307	60	82	403	154	316	177							0	0	0	0	0	0	0	122	0	0
	198	73	853	309	115	324	377	293	422	82							0	0	8	0	0	0	0	10	0	0
	222	110	635	363	42	269	434	117	390	80							0	0	60	0	0	0	0	5	0	0
	244	238	843	403	137	340	440	173	116	236							0	0	4	0	0	0	0	16	0	0
	131	151	634	460	130	351	169	92	269	464							0	0	0	0	7	0	0	22	0	0
	93	120	539	506	91	205	212	94	387	689							0	0	0	0	0	0	0	13	0	0
	112	94	476	659	155	208	151	103	432	679							1	0	0	0	3	0	0	7	0	0
	111	121	336	579	182	188	73	126	362	878							2	0	0	0	0	0	0	9	0	0
	117	17	403	589	130	177	161	180	486	729							0	0	0	0	0	0	0	3	0	0
	173	13	287	767	48	180	158	182	498	414							5	0	0	0	0	0	0	7	0	0
	285	43	309	683	48	112	169	202	569	242							2	0	0	0	0	0	0	6	0	0
	363	26	234	794	27	130	80	197	535	246							0	0	0	0	0	0	0	3	0	0
	354	8	86	710	45	96	75	71	325	577							0	0	0	0	0	0	0	5	0	0
	294	52	93	630	8	121	96	120	334	711							0	0	0	0	0	0	0	10	0	0
	286	54	156	496	3	106	50	117	444	587							0	0	0	0	0	0	0	12	0	0
	308	86	109	542	45	99	150	156	551	297							0	0	0	0	0	0	0	21	0	0
	201	29	160	511	57	97	190	169	508	78							0	0	2	0	0	0	0	20	0	0
	210	30	203	482	20	84	122	209	407	70							0	0	0	0	0	0	0	167	0	0
	199	2	159	433	42	125	87	92	325	32							0	4	1	0	0	0	0	187	0	0
	190	3	80	362	117	105	120	67	460	166							0	0	0	0	0	0	0	170	0	0
	132	0	86	268	93	148	515	43	750	196							0	0	0	1	0	0	0	186	3	0
	180	21	32	313	5	122	632	135	901	162							0	0	0	0	0	0	0	84	0	0
	133	284	263	451	86	154	492	164	910	192							1	0	0	0	0	0	0	44	0	0
	87	461	203	391	41	144	549	259	864	273							0	0	0	0	0	0	0	97	0	0
	134	385	149	510	93	88	505	380	912	299							0	0	0	0	0	0	0	200	0	0
	217	231	188	462	64	110	278	510	852	273							0	0	0	0	0	0	0	42	0	0
	86	242	124	410	5	109	419	607	936	166							0	0	0	0	0	0	0	157	0	0
	15	119	46	379	78	152	410	672	928	254							0	0	0	0	0	0	0	169	0	0
	38	187	108	342	30	188	418	647	859	313							0	0	0	0	0	0	0	186	0	0
	78	152	118	194	42	105	409	837	541	187							0	0	0	0	0	0	0	150	0	0
	42	158	30	388	75	84	559	653	529	239							0	0	0	0	0	0	0	205	0	0
	55	124	21	358	15	65	537	710	330	308							0	0	0	0	0	0	0	42	0	0
	69	17	45	352	22	53	526	705	184	531							0	0	0	0	0	0	0	175	0	0
	113	0	10	328	50	37	493	470	183	544							0	0	0	0	0	0	0	168	0	0
	156	25	3	229	22	86	559	421	299	434							0	0	0	0	5	0	0	302	0	0
	28	385	56	247	33	101	683	534	502	535							0	0	0	0	2	0	0	135	0	0
	102	492	240	227	109	45	587	813	591	427							0	0	0	0	0	0	0	226	0	0
	19	293	249	151	57	60	483	696	369	209							0	0	0	0	0	0	0	61	0	0
	1	297	284	173	36	60	630	820	145	243							0	0	0	0	0	0	0	198	0	0
	21	186	344	197	137	60	552	921	164	109							0	0	0	0	0	0	0	52	0	0
	14	407	390	293	191	60	330	738	427	101							0	0	0	0	0	0	0	38	0	0
	72	366	369	333	242	74	425	579	608	68							0	0	0	0	0	0	0	19	0	0
	66	314	387	140	246	127	551	374	217	18							0	0	0	0	0	0	0	106	0	0
	51	416	329	286	209	82	475	130	274	92							0	0	0	0	0	0	0	202	0	0
	63	441	358	43	185	108	421	516	332	31							0	0	0	0	4	0	0	69	0	0
	50	436	285	198	215	73	329	405	141	76							0	0	0	0	0	0	0	7	0	0
	10	477	330	252	322	133	397	321	171	72							0	0	1	0	0	0	0	7	0	0
	41	379	524	141	317	103	423	387	99	51							0	1	7	0	7	0	0	94	0	0
	51	332	353	161	306	51	340	489	67	58							0	0	2	0	3	0	0	207	1	1
	112	264	313	88	259	49	477	416	185	163							0	0	0	0	0	0	0	67	28	0
	164	425	181	252	220	33	564	324	99	95							0	0	0	0	0	0	0	61	37	17
	120	397	176	266	171	50	433	432	119	328							0	0	0	0	0	0	0	144	15	19
	131	319	30	275	184	12	374	432	175	399							0	0	1	15	0	0	0	118	14	3
	64	290	218	251	240	72	504	205	45	389							0	0	0	52	0	0	0	85	5	3
	130	245	241	269	431	16	501	74	90	413							0	0	0	30	0	0	0	89	13	0
	251	181	113	303	579	18	497	77	226	400							0	0	0	16	0	0	0	57	3	31
	191	94	82	299	740	18	376	110	87	505							0	0	0	17	0	0	0	55	1	43
	162	267	153	316	474	26	556	261	62	366							0	0	0	15	0	0	0	9	4	12
	178	276	110	256	202	26	455	493	85	490							0	0	0	4	0	0	0	112	1	0
	108	183	39	208	111	25	438	311	21	394							0	0	0	7	0	0	0	6	0	1
	117	182	111	119	79	6	217	265	26	375							0	0	0	1	0	0	0	72	1	0
	73	376	26	186	69	32	232	80	110	306							0	0	0	2	0	0	0	2	0	1
	142	376	25	131	87	10	518	167	114	211							0	0	0	1	0	0	0	59	1	2
	190	398	66	52	120	29	776	111	668	316							0	0	0	1	0	0	0	1	1	0
	199	450	47	17	152	4	731	98	1149	311							0	0	0	4	1	0	0	1	15	0
	198	610	59	91	143	0	788	123	1296	243							0	0	0	7	5	0	0	6	6	0
	307	457	1	185	188	39	709	114	1372	388							0	0	0	3	0	0	0	0	2	0
	247	265	40	113	303	28	598	107	1348	299							0	0	0	2	0	0	0	31	0	0
	213	195	6	102	321	10	716	57	1288	313							0	0	0	0	0	0	0	3	4	1
	163	186	8	58	431	55	662	73	1116	315							0	0	0	0	0	0	0	8	0	0
	150	248	5	61	451	43	599	55	760	292							0	0	0	0	0	0	0	3	0	0
	154	241	42	27	475	0	749	81	439	464							0	0	0	0	0	0	0	0	0	0
	161	391	37	11	526	37	875	117	572	495							0	0	0	0	0	0	0	0	0	0
	128	517	20	11	477	59	752	153	497	410							0	0	0	0	0	0	0	7	1	1
	178	486	49	13	567	122	646	85	275	621							0	0	0	0	0	0	0	11	0	1
	93	346	30	35	590	53	578	64	227	619							0	0	0	0	0	0	0	0	9	0
	106	271	12	43	590	20	448	65	341	524							0	0	0	0	0	0	0	0	10	8
	191	316	61	51	519	184	241	102	344	306							0	0	1	0	0	0	0	1	3	49
	64	256	6	5	437	243	233	42	436	245							0	0	0	5	0	0	0	11	9	44
	33	269	50	30	394	41	311	182	604	175							0	0	0	0	0	0	0	10	0	90
	57	227	35	21	503	259	326	275	723	129							0	0	0	3	0	0	0	4	2	64
	11	166	31	12	628	73	416	267	775	147							0	0	0	2	0	0	0	19	3	10
	20	73	62	22	606	1	615	188	708	56							0	0	0	2	0	0	0	0	0	22
	2	5	29	0	522	4	462	129	408	52							0	0	0	0	0	0	0	0	0	98
	18	44	5	13	485	35	389	100	155	69							0	0	0	0	0	0	0	0	0	158
	50	76	34	42	481	81	384	240	299	118							0	0	0	0	0	0	0	0	0	137
	41	34	1	147	235	92	331	195	349	96							0	0	0	0	0	0	0	0	2	131
	23	21	0	83	386	39	197	124	307	51							0	0	0	0	0	0	0	0	0	65
	5	38	6	60	468	110	312	69	344	69							0	0	0	0	0	0	0	0	0	48
	0	47	13	101	510	166	427	64	503	34							0	0	0	0	0	0	0	0	0	5
	2	69	47	76	474	26	493	31	426	53							0	0	0	0	0	0	0	0	2	6
	112	17	17	92	555	97	462	32	319	114							0	0	0	0	0	0	0	0	6	10
	84	9	82	126	562	42	415	194	605	48							0	0	0	0	0	0	0	0	0	21
	92	3	158	126	430	15	496	321	615	366							0	0	0	0	0	0	0	0	0	27
	5	1	79	168	494	9	632	198	723	416							0	0	0	0	0	0	0	0	0	10
	75	2	57	175	584	53	677	151	683	438							0	0	0	0	0	0	0	0	0	0
	42	0	16	145	687	13	807	324	658	329							0	0	0	0	0	0	0	0	0	2
	132	1	47	253	700	73	690	417	847	557							0	0	0	0	0	0	0	1	0	0
	73	2	3	343	901	114	527	334	1226	737							0	0	0	0	0	0	0	0	0	0
	159	62	56	362	934	34	538	378	1189	789							0	0	0	0	0	0	0	0	1	1
	210	91	7	294	761	0	478	386	915	549							0	0	0	0	0	0	0	0	2	1
	65	20	15	185	807	0	355	369	515	770							0	0	0	0	0	0	0	0	9	0
	12	30	116	287	738	116	269	433	324	661							0	0	0	0	0	0	0	0	8	0
	16	20	40	273	409	0	350	480	343	584							0	0	0	0	0	0	0	0	10	0
	0	30	46	243	164	13	387	516	294	363							0	0	0	0	0	0	0	0	0	0
	0	10	64	177	241	24	508	776	354	476							0	0	0	0	0	0	0	0	2	1
	7	56	26	222	396	34	447	703	533	618							0	0	0	0	0	0	0	1	0	1
	30	36	61	124	412	2	517	527	493	713							0	4	0	0	0	0	0	0	2	5
	22	98	37	130	516	55	314	488	321	633							0	0	0	0	1	0	0	47	0	0
	2	169	26	89	486	0	214	483	168	434							1	0	0	2	0	0	0	21	0	0
	0	240	55	86	528	108	206	521	333	611							0	1	0	60	1	0	0	0	0	0
	95	246	39	95	552	14	128	530	536	481							0	0	0	93	0	0	0	0	1	0
	161	459	88	15	477	1	58	474	629	305							0	0	0	70	0	0	0	0	0	1
	184	568	48	70	636	71	27	378	643	332							0	0	0	27	0	0	0	0	0	0
	295	507	0	147	607	54	91	515	631	288							0	0	0	42	0	0	0	0	0	0
	306	513	119	84	608	72	83	397	535	332							0	0	0	33	0	0	0	0	0	1
	263	466	204	17	756	1	28	161	442	374							0	0	0	33	0	0	0	0	0	0
	269	332	232	5	761	51	14	256	467	473							0	0	0	9	0	0	0	23	0	0
	284	302	209	32	729	0	16	183	374	621							0	0	0	20	0	0	0	0	0	0
	292	334	243	261	653	53	166	319	525	515							0	0	0	6	0	0	0	0	0	0
	344	214	280	472	429	14	113	400	598	401							0	0	0	2	0	0	0	0	0	0
	408	148	287	578	504	27	53	264	755	248							0	0	0	8	0	0	0	8	2	0
	346	123	375	499	565	53	33	120	802	247							0	0	4	34	0	44	0	10	0	0
	281	137	402	272	644	96	82	92	994	140							0	0	0	70	0	78	0	246	5	6
	188	178	194	237	477	113	58	103	863	324							0	0	2	42	0	27	0	468	2	8
	233	111	234	237	437	136	57	247	780	421							0	17	0	59	0	24	0	421	0	8
	244	238	280	270	495	61	65	88	740	256							0	93	5	69	52	1	0	327	0	12
	400	243	394	178	551	61	22	285	758	567							0	181	5	33	182	12	0	467	0	7
	499	230	476	191	590	15	38	779	659	477							0	217	0	34	147	47	0	433	56	4
	421	166	328	35	509	71	37	1273	601	459							0	206	1	35	62	86	1	377	107	1
	407	162	191	162	657	95	34	1361	327	643							0	259	0	52	53	174	4	277	32	279
	380	159	279	289	845	97	72	1130	230	601							0	182	8	51	62	196	0	77	34	1173
	397	157	342	234	810	213	85	770	76	464							0	167	0	69	37	164	0	211	22	1251
	373	108	424	215	878	248	127	518	73	268							0	177	1	70	8	272	0	179	13	1274
	421	114	284	221	849	249	174	480	119	293							0	295	0	52	32	866	0	187	18	1304
	288	148	484	233	817	347	232	463	223	201							0	197	19	21	152	723	28	166	0	894
	156	109	567	232	954	286	283	415	299	211							0	211	18	8	208	439	33	31	42	624
	98	92	502	187	926	474	296	135	141	184							0	208	36	1	220	284	76	32	120	618
	45	133	515	35	998	482	387	112	171	134							0	213	3	0	189	210	144	86	198	640
	79	131	366	0	998	349	434	283	129	161							0	274	27	0	301	363	82	54	281	307
	37	120	624	9	837	404	384	371	214	116							0	289	2	0	445	736	88	35	239	534
	41	145	806	96	649	274	293	462	181	529							0	294	0	1	616	839	32	17	214	291
	44	86	821	35	536	227	330	598	90	1325							0	346	0	1	1076	721	1	23	157	230
	76	93	753	8	607	212	322	768	43	1728							0	275	1	0	1858	812	0	117	179	267
	25	65	528	129	641	245	343	643	102	1396							0	256	0	0	2586	527	4	124	220	324
	26	100	607	18	601	184	468	555	122	1321							0	345	0	0	2630	500	13	126	218	319
	4	55	704	14	546	143	472	324	55	1038							0	354	0	0	2189	448	0	105	235	277
	32	39	925	0	592	201	359	194	19	779							0	322	0	0	1814	331	2	101	158	204
	94	88	875	0	473	280	388	184	91	828							0	359	0	0	1465	326	0	45	206	174
	57	63	772	2	419	324	393	293	129	888							0	320	0	0	1124	390	0	71	188	35
	150	45	742	12	417	281	247	183	61	764							0	334	0	0	878	371	0	102	98	89
	260	6	677	2	315	137	178	83	54	700							0	321	0	0	662	323	0	69	195	393
	183	56	507	62	337	53	155	244	236	721							0	320	0	0	537	258	112	32	254	635
	154	3	290	28	278	30	52	330	251	865							0	431	4	0	607	331	432	56	225	913
	233	37	165	11	267	38	230	449	215	747							0	552	139	0	653	359	688	22	262	317
	310	25	154	66	186	130	218	422	20	688							0	823	220	1	741	433	279	114	298	414
	361	51	235	58	189	198	246	253	47	648							0	604	104	0	793	643	483	94	288	978
	467	62	253	17	155	221	455	418	151	535							0	688	55	1	936	586	151	138	437	630
	427	16	98	79	156	208	481	247	375	744							0	673	74	3	850	421	263	194	347	663
	495	42	58	24	213	155	305	199	394	865							0	649	36	3	899	460	301	162	392	850
	419	53	19	20	256	291	396	247	527	835							0	558	41	0	707	432	479	97	409	1249
	365	4	140	110	260	316	328	394	547	854							0	554	21	0	502	357	403	70	568	1298
	434	10	574	58	190	310	298	164	643	981							0	631	29	1	401	335	227	53	680	1168
	468	94	633	48	76	242	184	187	815	971							0	497	13	0	268	244	135	45	958	1414
	389	74	483	296	102	377	30	253	831	1019							0	264	10	1	419	173	200	62	943	1056
	431	51	325	344	74	377	188	492	761	1051							0	164	6	0	322	156	477	86	761	868
	447	41	134	257	119	365	298	457	647	1222							0	168	17	0	197	154	290	99	776	715
	462	40	40	168	95	325	572	700	689	1243							0	290	6	0	159	95	356	68	988	1019
	444	5	72	128	91	238	360	354	539	1357							0	279	0	0	208	141	344	19	1612	630
	482	19	52	209	75	275	477	450	638	1416							0	149	0	0	173	85	272	22	1819	316
	499	13	151	141	30	292	456	225	390	1350							0	155	0	0	185	124	90	26	1680	326
	471	29	68	98	76	341	309	303	350	1299							0	137	2	0	266	157	80	19	1182	294
	423	7	92	223	145	359	355	295	586	1759							0	108	0	0	303	172	40	54	1389	508
	369	21	30	248	49	347	656	413	340	1808							0	97	0	0	341	149	37	104	1228	506
	383	30	7	243	51	217	981	721	347	1588							0	169	0	0	343	102	33	22	601	462
	334	0	15	226	33	221	1048	618	248	1382							0	193	0	0	326	101	11	56	340	240
	249	25	7	191	7	264	1033	554	211	1358							0	119	0	0	206	105	8	27	524	266
	195	2	2	266	8	292	983	552	310	721							0	94	0	0	51	88	5	18	780	382
	138	20	37	265	14	247	1052	342	339	590							0	40	0	0	127	118	0	34	941	300
	149	13	402	197	12	188	1136	359	255	745							0	56	0	0	79	152	1	79	810	217
	88	3	904	256	20	144	903	376	146	888							0	163	0	0	49	152	1	24	840	370
	63	23	1097	267	53	85	490	85	191	855							0	181	0	0	80	112	3	61	1141	171
	32	1	1229	328	3	37	245	128	112	880							0	157	0	0	84	84	13	18	1095	436
	67	17	1011	327	32	30	103	131	306	613							0	200	1	0	31	98	43	21	905	332
	66	9	812	347	43	20	147	177	132	899							0	481	0	3	90	227	47	77	813	67
	32	31	476	243	118	1	411	378	145	1039							0	434	0	5	248	108	32	62	919	231
	11	17	513	231	161	52	562	396	91	1087							0	231	0	82	181	29	14	62	481	276
	53	31	328	182	182	24	696	336	271	685							0	222	0	127	162	20	7	15	587	232
	19	13	366	203	165	22	745	407	242	784							0	244	0	86	323	13	9	94	501	102
	7	10	257	152	168	22	645	119	48	647							0	267	0	18	352	31	3	72	207	258
	12	21	298	212	140	28	647	113	172	818							0	262	0	9	267	18	4	39	244	415
	39	65	161	246	187	22	724	195	192	793							0	89	0	35	187	56	0	28	657	264
	39	60	74	208	76	24	822	176	299	567							0	178	0	20	156	123	0	52	596	237
	81	41	73	154	99	67	820	212	235	777							0	154	1	32	210	141	12	24	544	424
	42	54	96	117	57	80	758	241	181	522							0	201	0	71	136	123	5	25	338	405
	38	51	104	123	185	96	650	120	58	592							0	295	1	93	44	154	2	63	314	368
	100	81	57	132	235	233	729	233	63	986							0	282	2	97	84	166	2	54	574	378
	107	88	66	107	269	226	652	380	230	949							0	237	0	68	171	122	0	37	542	502
	209	107	34	55	389	222	540	253	225	641							0	208	0	46	204	72	0	6	76	175
	267	97	36	36	335	207	444	78	227	177							0	42	0	30	180	53	0	11	205	133
	207	81	17	47	299	172	399	156	354	175							0	101	0	1	220	81	2	0	186	102
	172	90	16	15	357	204	281	218	222	122							0	250	0	2	189	78	1	0	168	156
	227	100	27	0	546	296	316	57	188	176							0	389	0	10	249	25	0	0	153	158
	225	150	18	7	591	278	482	88	203	186							0	251	0	6	213	11	0	0	105	180
	253	202	12	35	511	224	560	194	323	235							0	589	0	0	261	30	0	0	205	57
	251	188	20	65	545	273	571	102	346	572							0	147	0	1	200	34	0	0	212	69
	249	173	34	84	430	249	476	164	243	591							0	296	0	0	321	5	0	0	148	82
	218	172	52	97	506	371	474	127	371	674							0	108	0	0	299	14	0	0	31	61
	198	131	80	26	414	255	439	187	462	439							0	83	0	0	249	56	0	1	31	52
	166	58	116	4	468	193	443	86	335	621							0	349	0	0	311	53	5	0	79	42
	155	3	110	51	309	188	224	81	224	513							0	218	0	0	208	55	0	0	275	33
	19	7	227	105	284	140	382	244	97	568							0	41	0	0	148	20	1	0	161	0
	76	11	313	116	325	82	506	248	166	602							0	25	0	0	153	137	0	0	101	16
	215	6	213	94	141	111	297	148	311	161							0	276	0	0	174	283	0	202	162	23
	193	6	173	81	103	23	450	118	233	311							0	261	0	2	149	486	0	299	477	9
	102	6	104	115	419	40	215	121	323	328							0	548	1	0	145	312	0	241	506	63
	267	0	146	116	321	50	56	309	151	443							0	360	0	4	123	178	0	175	196	85
	409	0	175	97	275	38	60	239	254	355							0	187	0	7	278	103	3	110	129	122
	416	0	211	104	141	83	81	174	141	219							0	333	0	51	348	243	0	44	166	130
	331	2	307	149	151	87	144	211	197	217							0	336	0	111	433	323	9	87	152	227
	246	0	427	230	49	63	331	187	232	237							0	252	0	93	309	244	30	122	126	447
	244	6	366	295	130	151	212	134	307	41							0	269	0	65	347	233	25	22	218	448
	238	11	201	292	11	110	195	89	526	40							0	58	0	53	348	86	5	88	107	120
	292	51	180	275	106	40	180	95	507	43							0	135	0	66	374	168	1	15	193	33
	294	121	69	171	188	45	121	205	564	144							0	35	2	67	417	181	0	6	442	5
	178	143	82	63	222	20	226	48	696	166							0	160	3	70	397	113	0	13	413	0
	188	129	49	68	365	20	198	21	774	84							0	292	0	51	324	53	0	1	326	0
	193	191	24	80	474	10	161	116	827	175							0	342	0	32	302	54	0	0	122	0
	263	65	7	111	592	7	114	111	508	62							0	96	1	26	137	20	0	0	332	0
	331	36	34	87	541	5	14	167	871	26							0	284	0	4	158	24	0	1	531	0
	242	30	12	112	315	27	31	253	743	13							0	57	0	3	172	45	0	0	379	0
	214	51	86	112	122	19	46	112	726	61							0	174	0	0	191	11	0	0	179	0
	129	64	255	149	192	19	152	74	804	137							0	169	0	1	148	6	0	0	508	0
	47	13	340	193	133	3	123	107	768	253							0	85	0	3	222	6	0	0	671	0
	59	2	346	143	101	9	65	64	671	337							0	51	0	0	199	5	0	0	676	0
	33	27	317	154	15	28	103	369	461	392							0	149	1	0	84	0	0	0	509	0
	46	30	412	130	7	9	87	136	426	384							0	161	2	0	59	6	0	0	451	0
	117	64	589	142	11	2	27	240	245	512							0	136	1	0	34	11	0	0	367	0
	64	124	661	158	42	11	4	108	142	488							0	53	0	0	43	1	0	0	452	0
	103	203	507	199	14	23	5	151	253	530							0	80	0	0	71	1	0	1	419	0
	57	168	188	220	6	18	4	148	359	445							0	182	0	0	31	11	0	0	489	0
	58	238	239	220	10	2	32	146	172	510							0	94	12	0	14	1	0	0	605	0
	107	139	196	238	8	1	19	276	555	374							0	258	97	0	5	46	0	0	505	0
	80	230	207	201	67	9	43	47	686	317							0	157	121	0	18	71	0	0	868	0
	61	60	143	171	33	0	1	155	763	248							0	58	12	8	220	70	0	3	534	1
	123	23	233	130	107	14	19	23	470	283							0	89	10	3	292	84	0	3	498	1
	60	165	220	92	97	3	24	204	518	362							0	270	9	8	261	78	0	33	383	0
	68	224	165	84	137	8	8	484	467	418							0	102	27	23	263	37	0	185	629	0
	82	214	241	112	78	4	0	407	455	403							0	84	190	22	254	65	0	303	477	0
	67	116	443	65	53	10	3	476	393	409							0	187	316	76	254	157	0	232	488	1
	102	98	567	69	53	10	16	185	89	448							0	52	209	102	194	74	0	118	126	0
	163	74	488	31	33	7	34	186	144	405							0	274	166	80	64	127	0	59	515	0
	281	114	373	15	72	0	18	156	99	215							0	180	274	43	48	85	0	75	262	0
	387	30	331	16	5	2	93	173	143	248							0	19	328	4	34	6	0	113	578	0
	625	87	337	44	8	23	90	167	63	80							0	12	368	9	67	76	0	135	29	0
	698	80	399	63	15	10	95	268	61	159							0	38	377	16	224	19	0	172	339	0
	731	98	507	60	12	9	66	327	67	32							0	98	491	14	143	35	0	109	445	0
	680	45	469	147	23	8	126	117	195	130							0	165	461	1	179	59	0	158	211	0
	599	9	317	183	152	1	83	165	221	229							0	17	316	5	86	42	0	80	168	0
	419	8	298	102	109	10	123	154	144	230							0	0	362	0	54	38	0	44	233	0
	386	1	318	34	61	70	74	181	49	4							0	8	635	0	79	20	0	22	201	0
	383	88	416	0	74	70	80	51	62	184							0	4	835	0	76	3	0	30	321	0
	361	64	483	10	74	57	61	102	115	144							0	1	1087	0	72	14	0	19	320	0
	199	1	564	90	103	74	83	360	46	165							0	0	1264	0	21	14	0	8	129	0
	182	38	675	200	24	19	91	326	63	167							0	0	2171	0	7	12	0	33	198	0
	130	40	722	198	60	44	183	322	77	138							0	0	2813	0	47	79	0	13	209	0
	49	17	661	132	11	33	217	216	154	228							0	0	2579	0	73	149	0	17	172	0
	22	55	779	92	37	4	228	103	94	138							0	0	3062	0	73	153	0	4	48	0
	38	30	650	117	1	7	227	120	29	85							0	0	3006	0	59	119	0	4	245	0
	50	22	661	169	26	2	248	134	159	46							0	0	2760	0	0	147	0	10	228	0
	51	101	791	219	12	25	221	96	126	71							0	0	2598	0	14	138	0	26	254	0
	44	87	749	312	42	22	161	118	67	82							0	0	2245	0	29	21	0	38	151	0
	32	32	687	358	29	14	267	259	335	137							0	0	2002	0	0	244	0	0	127	0
	5	86	772	392	82	22	250	275	255	97							0	0	1859	0	7	250	0	20	447	0
	14	19	730	241	68	47	298	626	73	256							0	0	1386	2	1	350	0	148	402	0
	15	49	732	288	34	12	111	614	156	330							0	0	1531	0	96	486	0	99	392	3
	49	15	952	95	125	7	189	657	241	478							0	0	1742	4	39	460	0	126	689	0
	11	53	709	104	130	42	180	694	130	471							0	0	1404	20	49	380	0	113	533	0
	21	103	592	15	190	7	320	629	391	464							0	0	1013	0	20	440	0	68	503	0
	1	94	461	18	139	9	302	607	263	357							0	0	692	12	127	511	0	76	344	0
	19	4	497	76	161	4	362	495	209	410							0	0	872	2	148	535	0	98	276	0
	27	21	594	165	39	11	345	551	206	372							0	0	463	2	147	387	0	114	475	0
	6	69	687	232	59	11	428	497	255	286							0	0	787	3	85	419	0	100	205	0
	21	60	702	241	112	27	315	204	323	217							0	0	535	0	122	295	0	97	505	3
	5	26	667	238	220	10	306	238	209	423							0	0	277	0	125	97	0	83	382	34
	5	22	791	99	203	15	398	285	425	408							0	0	196	0	112	162	0	219	499	125
	5	80	789	62	107	15	399	309	382	279							0	0	258	7	51	92	0	292	1026	36
	10	40	631	76	90	13	369	419	206	156							0	0	337	5	38	89	0	211	944	8
	2	2	497	80	79	8	310	285	197	102							0	0	300	16	10	30	0	234	682	0
	22	14	440	146	118	5	354	144	96	128							0	0	356	1	0	21	0	183	601	0
	41	40	406	181	54	0	436	248	137	92							0	0	462	5	3	4	0	309	696	0
	20	3	384	172	67	9	409	426	111	134							0	0	363	0	11	58	0	317	804	0
	13	32	386	110	42	25	440	420	288	181							0	0	235	0	21	142	0	465	856	0
	17	10	381	43	75	16	432	420	264	129							0	0	187	0	22	30	0	373	837	0
	48	1	205	24	116	13	368	406	191	39							0	0	202	0	3	86	0	306	772	0
	106	6	176	89	194	7	329	454	269	139							0	0	128	0	6	137	0	171	468	0
	160	0	184	106	65	12	365	109	193	166							0	0	279	0	0	159	0	240	565	0
	120	0	91	163	69	1	323	126	79	134							0	0	379	0	29	95	0	267	707	0
	110	0	43	111	35	0	334	126	67	188							0	0	446	0	0	9	0	241	706	0
	53	8	71	106	24	11	250	48	133	156							0	0	346	0	6	4	0	178	739	0
	29	0	47	70	11	11	275	76	36	51							0	0	255	0	1	63	0	230	575	0
	10	0	51	54	21	0	229	319	449	19							0	0	115	0	0	49	0	69	367	0
	3	3	5	76	36	0	219	164	433	6							0	0	102	0	4	277	0	336	173	0
	2	0	53	137	10	28	178	158	397	18							0	0	75	0	21	303	0	129	291	0
	4	2	35	163	32	109	207	209	428	18							0	0	145	7	92	416	0	468	264	4
	37	14	534	157	58	152	106	464	484	24							0	0	258	0	188	386	0	719	386	160
	18	89	589	141	91	98	144	561	355	70							0	0	387	1	198	290	0	534	359	469
	12	81	634	149	148	64	98	334	153	23							0	0	399	40	129	167	0	620	476	297
	29	48	526	159	112	36	121	275	240	15							0	0	359	85	97	156	0	488	531	335
	20	20	530	250	35	29	191	341	545	76							0	0	428	69	89	284	0	437	353	499
	0	68	290	197	45	17	159	501	553	30							0	0	286	51	38	274	0	325	337	439
	1	12	397	112	27	21	44	355	502	56							0	0	286	50	64	324	0	270	305	332
	10	7	625	171	7	8	32	426	756	108							0	0	357	50	61	327	0	284	251	426
	10	18	642	218	78	54	72	109	555	36							0	0	425	28	60	346	0	495	190	766
	58	6	675	242	23	85	114	132	356	6							0	0	208	12	114	317	0	348	293	739
	18	24	716	142	7	13	138	133	407	40							0	0	316	34	86	182	0	508	158	659
	6	9	721	195	19	75	304	107	643	36							0	0	402	1	89	71	0	407	123	262
	12	17	918	217	35	71	288	196	916	34							0	0	159	4	94	94	0	379	170	295
	21	15	714	166	48	21	330	22	693	96							0	0	203	8	48	68	0	266	120	404
	40	3	565	190	21	6	210	56	864	105							0	0	141	9	22	138	0	376	129	501
	42	18	547	175	93	9	292	59	747	69							0	0	204	1	81	206	0	346	109	768
	31	31	493	281	19	9	352	76	606	80							0	0	187	0	52	223	0	213	49	1017
	29	11	535	348	84	2	667	115	611	112							0	0	187	0	17	136	0	45	14	1225
	33	41	673	326	48	2	887	132	775	162							0	0	140	0	21	304	0	195	25	1374
	24	6	600	262	129	5	920	220	664	238							0	0	139	0	8	206	0	249	29	1073
	8	4	606	248	222	4	881	189	884	146							0	0	207	0	31	115	0	312	23	1020
	14	1	451	396	95	2	665	143	848	31							0	0	265	0	1	137	0	374	75	1226
	16	64	315	333	97	5	566	62	760	37							0	0	155	0	1	50	0	343	58	1320
	5	80	282	325	32	11	676	80	385	62							0	0	109	0	0	38	0	383	57	1268
	3	35	508	337	92	13	641	99	486	134							0	0	150	0	0	39	0	165	94	1037
	3	57	617	402	140	12	490	169	592	144							0	0	177	0	0	6	0	302	119	697
	13	77	797	590	105	0	305	115	406	88							0	0	127	0	0	23	0	367	180	357
	2	93	897	553	27	0	202	132	306	45							0	0	172	0	0	11	0	375	221	288
	2	114	734	385	31	1	32	383	546	31							0	0	254	0	3	53	0	403	155	720
	1	75	624	436	60	0	48	447	430	36							0	0	235	6	95	68	0	217	120	1189
	3	99	522	477	82	0	144	397	170	15							0	0	283	6	322	25	0	234	119	1506
	2	48	661	376	103	0	349	374	232	25							0	0	258	52	306	68	0	222	81	1984
	1	95	713	446	245	0	235	290	84	7							0	0	39	171	227	56	0	335	106	1981
	7	85	863	313	380	2	219	116	239	64							0	0	40	152	171	14	0	311	179	1766
	4	96	1052	277	317	2	229	45	196	49							0	0	115	111	113	41	0	197	127	1577
	0	102	1157	362	264	0	311	69	18	84							0	0	77	99	126	42	0	263	152	1692
	0	203	1282	221	194	2	205	61	430	104							0	0	65	97	104	1	0	247	137	1270
	17	136	1047	242	190	0	94	33	468	273							0	0	20	99	21	2	0	236	89	1064
	2	181	1094	303	183	0	53	228	560	473							0	0	14	93	14	20	0	226	96	586
	1	121	1270	74	163	3	90	342	655	619							0	0	9	52	23	7	0	138	167	454
	3	142	1467	139	272	1	207	504	778	564							0	0	19	101	66	64	0	221	137	444
	1	203	1178	133	189	0	191	449	515	232							0	0	6	133	48	13	0	168	145	533
	2	195	1651	52	93	4	228	481	370	174							0	0	16	170	60	44	0	136	129	530
	0	249	1662	139	217	0	245	424	402	209							0	0	24	149	32	32	0	88	63	388
	2	213	853	115	273	0	339	581	461	286							0	0	22	109	45	6	0	57	6	176
	3	102	330	124	305	2	341	546	349	279							0	0	24	52	142	0	0	87	20	177
	14	166	394	181	119	0	268	468	312	349							0	0	10	16	168	12	0	67	30	122
	39	158	651	107	11	0	187	488	243	246							0	0	6	33	81	10	0	61	36	70
	34	51	783	52	46	2	273	685	168	171							0	0	0	26	44	25	0	116	16	218
	45	93	899	70	3	0	218	783	118	266							0	0	5	24	7	6	0	19	1	293
	87	64	635	40	0	0	124	926	371	220							0	0	30	7	1	45	0	102	13	291
	83	46	985	152	0	0	162	838	297	67							0	0	77	5	0	0	0	34	1	76
	71	218	673	224	0	2	171	1124	452	145							0	0	52	6	0	0	0	50	9	40
	43	178	431	292	0	1	69	733	269	165							0	0	32	7	0	0	0	2	0	71
	16	87	547	307	34	0	117	667	260	44							0	0	15	14	0	30	0	37	5	12
	14	125	397	156	268	4	235	495	251	62							0	0	16	8	5	17	0	22	2	21
	100	159	360	148	246	5	274	567	222	78							0	0	31	2	0	18	0	39	1	41
	79	187	205	116	360	0	124	599	126	258							0	0	17	16	1	3	0	31	0	37
	50	86	66	121	367	2	263	706	58	366							0	0	26	5	4	9	0	35	10	222
	54	127	261	17	335	2	151	595	107	487							0	0	45	19	9	3	0	152	1	340
	86	238	526	105	218	2	171	547	109	397							0	0	59	43	7	11	0	113	14	249
	102	385	372	55	320	24	200	640	299	283							0	0	84	28	35	13	0	142	22	262
	121	447	394	218	405	37	254	837	286	269							0	0	38	7	53	53	0	72	26	241
	42	434	401	232	394	10	307	547	273	217							0	0	20	22	35	18	0	78	22	71
	121	313	329	179	347	11	345	726	318	285							0	0	6	12	27	5	0	54	1	147
	134	246	65	320	270	14	326	401	186	251							0	0	9	11	32	0	0	93	3	26
	159	125	165	433	185	33	378	413	322	226							0	0	14	10	57	0	0	44	9	58
	81	47	130	192	86	36	407	583	278	92							0	0	16	18	54	3	0	114	4	77
	181	30	184	360	51	82	435	565	190	52							0	0	27	7	135	0	0	139	1	203
	317	16	507	251	44	125	461	366	232	50							0	0	27	85	98	7	0	59	2	101
	140	10	294	253	50	132	382	96	67	84							0	0	6	121	131	0	0	137	3	154
	178	1	480	193	114	116	567	380	103	18							0	0	2	91	53	6	0	90	1	250
	284	0	849	116	90	122	680	401	185	49							0	0	2	98	43	0	0	70	4	42
	303	8	949	82	94	105	727	236	425	22							0	0	0	44	26	0	0	74	0	69
	312	5	1004	57	91	182	646	38	310	14							0	0	4	15	39	0	0	15	0	2
	142	36	972	37	31	237	585	226	281	39							0	0	4	0	40	0	0	34	0	51
	67	23	814	67	62	226	592	420	23	9							0	0	12	0	25	3	0	60	0	11
	113	10	384	33	58	182	572	580	31	29							0	0	24	6	86	31	0	5	4	29
	63	36	839	44	38	56	473	489	118	37							0	0	10	0	62	18	0	48	16	5
	149	66	1083	133	0	129	616	327	72	192							0	0	7	0	116	8	0	0	19	0
	13	73	910	267	38	109	415	119	253	133							0	1	13	0	225	6	0	20	2	0
	14	106	472	384	40	197	531	117	446	6							0	0	15	0	121	6	0	1	0	0
	11	133	284	277	73	249	568	196	69	82							0	0	19	0	33	0	0	16	0	12
	49	64	486	231	35	155	410	237	449	32							0	0	28	0	57	0	0	5	0	1
	16	68	765	253	21	231	456	286	445	14							0	0	1	0	51	1	0	1	0	0
	3	39	687	271	7	68	260	503	76	124							0	0	1	0	3	24	0	7	0	1
	92	4	338	236	14	172	265	377	50	104							0	0	5	0	21	30	0	0	11	6
	68	78	95	317	20	236	446	158	256	64							0	0	3	0	50	6	0	3	0	39
	88	144	225	320	1	299	340	319	129	133							0	0	24	0	91	0	0	4	3	545
	161	218	84	382	34	302	251	462	341	160							0	0	0	3	210	9	0	6	0	940
	170	211	173	313	69	265	477	525	132	180							0	0	5	0	316	84	0	27	27	834
	167	211	299	454	23	304	402	421	44	315							0	0	0	0	316	116	0	54	87	446
	128	290	259	489	7	191	292	360	58	423							0	0	0	0	362	158	0	34	66	177
	24	232	133	311	23	102	313	427	130	337							0	0	0	0	366	219	0	8	27	256
	58	192	158	246	38	39	287	339	162	320							0	0	0	1	305	229	0	3	12	342
	123	218	185	300	13	44	156	365	206	204							0	0	0	0	466	157	0	0	23	187
	23	236	136	304	52	9	249	474	180	297							0	0	0	0	695	119	0	0	73	49
	80	303	41	376	34	12	197	139	133	203							0	0	0	0	661	84	0	13	16	35
	69	210	93	324	62	22	407	202	251	81							0	0	0	0	603	74	0	0	16	32
	72	295	75	249	2	48	426	211	38	91							0	0	0	0	729	94	0	0	2	75
	153	306	61	317	19	22	484	194	81	41							0	0	0	0	813	18	0	16	23	30
	275	277	40	168	2	38	689	577	48	52							0	0	0	0	914	12	0	34	9	11
	144	316	74	165	62	108	890	192	74	0							0	0	0	0	580	90	0	2	3	13
	144	286	287	39	51	245	1025	302	57	50							0	0	0	0	736	54	0	0	0	2
	157	255	320	27	68	233	953	113	82	51							0	0	0	0	642	10	0	5	0	17
	274	258	441	62	21	165	912	176	39	42							0	0	0	0	468	69	1	0	1	6
	121	177	397	68	3	169	1085	150	17	87							0	0	0	0	518	4	6	0	0	0
	316	169	698	30	46	167	1268	32	3	74							0	0	0	0	495	84	1	1	4	0
	245	93	694	50	3	158	1358	70	3	1							0	0	0	0	547	3	1	0	2	0
	156	86	652	173	7	204	1159	247	121	2							0	0	0	0	383	29	1	0	0	0
	222	73	733	300	35	181	771	54	7	12							0	0	0	0	329	6	0	0	1	0
	220	142	1016	400	39	157	797	278	131	59							0	0	0	0	341	17	0	0	0	6
	160	80	1109	402	29	83	910	535	79	100							0	0	0	0	398	49	0	0	0	0
	287	58	1279	384	20	79	1066	673	1	75							0	0	0	0	418	126	0	0	0	0
	230	52	1493	347	74	58	1027	740	19	8							0	0	0	0	547	105	0	0	0	0
	142	46	1578	384	105	19	863	849	54	8							0	0	26	0	392	193	375	0	0	0
	169	55	1128	357	108	195	831	962	83	21							0	750	1435	0	300	95	531	0	9	37
	687	151	1180	400	47	491	1018	575	187	75							0	1366	1733	80	482	504	598	3	961	3250
	811	461	1290	564	356	423	1916	1032	1215	92							0	860	2021	988	2323	1163	692	2	1277	2972
	615	384	2237	1090	207	456	1218	939	2513	46							20	402	2313	1157	2119	921	515	0	1191	1391
	1361	335	2185	1625	431	659	1544	1090	1838	76							806	666	3183	815	1210	820	623	67	1411	998
	1309	32	1705	1097	724	1138	1249	1517	2342	602							1077	871	3493	1118	1923	636	763	1125	802	1015
	1305	453	1524	872	1426	874	2732	1432	1438	1880							1370	467	3018	2004	2353	963	989	1752	1435	935
	1355	313	1241	594	3276	696	2671	1069	2709	2514							1642	923	2054	1652	1723	1071	1314	1756	1449	473
	1572	574	1110	662	2760	712	2116	909	1728	2194							1987	731	2525	777	1370	918	1501	1263	1326	584
	1887	467	1202	743	3165	1431	2824	853	909	1332							2024	682	2321	1252	1281	1194	1827	1327	915	789
	2575	703	1377	988	3077	1806	2572	861	718	1767							1865	748	2055	1069	1082	975	2566	1143	1207	851
	2183	493	1530	842	3776	1737	1782	1822	530	2614							1232	790	1838	976	936	985	2577	456	1470	823
	1582	493	1392	956	3149	1342	1894	1846	1138	2065							1197	652	1215	915	835	1086	2534	745	1724	824
	1812	789	1564	1072	2024	1304	2124	745	1694	1055							1508	790	1460	993	976	870	2104	803	1826	862
	1295	1300	1895	1149	1314	1376	1750	263	2200	941							1295	1237	804	773	1576	752	1727	823	1339	899
	1516	1504	2116	1309	1338	812	1208	270	2276	838							1295	1485	708	734	1945	602	1507	406	1130	858
	1321	1682	2745	1007	1190	543	895	97	1394	911							1017	1118	813	907	1740	294	1107	860	876	956
	1323	1577	3289	871	728	570	921	149	1456	749							1099	1095	588	1036	1734	433	1184	883	1504	1136
	1480	815	3158	347	582	705	887	602	1265	717							855	729	562	1206	1308	530	998	505	1225	914
	865	879	3077	427	397	601	1025	1954	2120	833							950	734	851	1166	821	635	799	419	1097	742
	506	353	2277	283	529	745	1100	2259	2184	519							1175	656	998	1144	705	579	1176	489	707	1010
	708	631	1680	363	338	1572	1923	2123	1868	588							1916	805	1319	815	1336	589	850	352	535	828
	1396	501	1362	465	429	1516	2308	1508	1429	370							3125	654	1318	897	1262	791	756	635	743	909
	2194	1443	1181	495	845	1898	2655	1345	1074	738							2880	947	1031	658	1780	1130	349	773	1621	300
	2269	1300	857	560	2496	1827	2601	1048	979	1107							2843	1076	807	572	2111	1153	546	852	1481	350
	2388	742	804	422	3569	2136	2206	581	812	1474							2037	683	668	759	2452	1211	436	1112	1402	365
	2677	555	747	407	4287	3270	2079	548	1528	2473							2050	449	989	797	2771	1176	306	1672	1364	260
	2301	299	1056	427	4241	3185	1763	353	2210	2159							1697	570	1687	511	3021	890	210	1529	1937	534
	727	317	1027	577	3505	1637	1572	322	3067	2162							1437	510	2042	388	3534	1439	146	1576	1682	945
	200	355	1410	1428	2561	843	1985	315	2758	1667							1152	749	2445	550	3231	1476	142	1329	1571	820
	537	527	1975	2209	1817	1293	2424	341	2383	1807							858	901	2642	692	2906	1682	239	1254	1424	911
	704	438	2261	1974	978	1243	1732	338	2375	1736							1011	924	3064	679	2694	1364	158	450	1400	649
	977	499	2101	1699	701	899	1316	416	2119	1443							459	934	2639	437	2384	848	496	590	1131	655
	1208	361	1736	981	376	1385	751	336	1785	1376							707	1281	2475	629	2152	527	206	800	551	781
	1317	181	1711	577	381	1269	891	263	1653	1487							898	1135	2586	451	1489	473	272	408	526	701
	1129	147	1858	521	959	1378	905	438	1514	1883							936	1393	2710	520	1599	501	153	176	328	538
	1067	70	1806	405	773	788	748	466	1605	1148							740	1586	2530	408	1634	476	121	168	312	341
	847	80	1747	317	751	647	580	303	1542	554							797	1608	2473	443	1359	114	150	257	174	175
	558	136	1791	263	723	554	594	321	1577	1061							571	1266	2637	245	1486	134	200	454	225	377
	653	79	2166	296	823	248	581	265	1620	1493							581	1421	2505	231	1214	98	188	456	250	556
	570	31	1996	226	857	334	858	457	2136	1345							484	1146	2629	270	933	156	164	360	347	614
	612	16	1836	353	707	399	499	399	2048	1325							307	1590	2281	339	1149	96	121	180	272	262
	698	15	2057	255	461	407	319	291	1476	878							172	1634	2234	222	740	25	122	154	72	300
	371	7	2256	75	520	196	614	186	1317	391							235	786	1833	155	750	134	78	0	200	273
	554	2	2125	271	482	255	440	287	886	444							367	948	1739	292	791	16	41	37	278	94
	301	7	1908	319	88	54	228	234	1162	353							281	930	1170	349	709	73	34	140	198	224
	335	5	1689	477	54	303	211	150	571	336							201	619	1066	175	423	39	54	118	36	215
	556	6	1720	535	56	228	469	204	896	456							114	1123	1451	204	347	41	49	41	80	112
	376	1	1459	496	21	144	540	174	613	467							37	1213	1115	85	223	32	29	35	96	33
	257	10	2130	339	34	62	524	126	702	539							76	1007	1073	71	495	44	10	81	229	85
	251	28	1780	412	13	193	464	206	495	436							87	1038	1015	62	564	116	14	93	123	231
	265	22	1217	327	50	110	327	433	319	260							72	757	738	102	423	67	8	168	76	316
	328	10	1154	343	37	151	263	444	347	348							55	1031	1047	129	478	20	12	173	43	308
	308	10	1010	478	21	156	324	455	269	641							37	1004	760	127	437	36	34	252	205	176
	442	3	558	334	40	190	368	445	508	992							58	968	534	142	486	19	24	308	126	119
	433	5	1028	382	96	224	316	467	408	1033							37	981	210	90	315	40	0	173	47	122
	472	3	1001	309	50	86	294	465	500	898							21	634	427	81	337	46	20	78	173	78
	457	9	616	246	28	217	363	458	479	951							20	866	446	72	245	120	10	221	40	0
	268	20	643	266	24	190	321	406	376	623							34	693	538	212	140	114	28	266	78	17
	261	23	689	197	64	160	377	314	99	918							17	695	493	114	81	28	39	230	87	45
	266	64	462	216	129	207	461	328	312	765							12	652	464	99	68	55	32	123	156	14
	295	75	324	358	40	186	339	357	187	735							10	594	762	85	58	10	17	336	86	20
	195	66	289	371	5	71	274	459	444	601							8	785	587	111	153	21	31	306	254	4
	218	42	132	447	10	192	247	352	564	646							18	790	558	101	258	66	26	222	295	8
	167	148	157	382	13	173	208	269	281	732							8	627	543	96	7	85	27	122	218	4
	155	86	222	337	4	152	237	218	557	634							9	374	496	153	54	261	54	124	158	30
	188	143	193	287	1	123	276	123	567	484							17	389	571	107	155	163	48	170	135	16
	86	70	273	248	3	96	196	101	684	270							8	450	487	161	65	192	56	187	132	0
	177	96	134	167	2	199	67	209	523	141							9	441	339	155	114	145	71	227	94	0
	288	57	376	257	0	269	142	286	623	146							31	512	483	96	39	169	83	128	163	0
	218	73	82	169	0	116	269	297	565	174							45	408	485	124	49	80	73	70	111	0
	342	69	223	215	0	95	345	308	250	165							58	257	221	114	16	63	77	173	87	1
	205	13	85	80	0	110	347	272	188	107							35	190	128	89	9	120	41	155	77	16
	110	5	53	73	4	34	426	195	14	130							61	305	87	104	219	128	30	191	138	2
	225	19	140	129	39	152	341	171	57	81							50	71	115	70	92	74	17	172	113	3
	280	29	35	218	84	81	198	127	66	109							16	172	99	86	158	83	18	50	129	27
	66	31	106	111	103	140	65	152	52	106							24	83	67	131	261	48	70	107	163	0
	152	17	56	136	207	305	45	203	108	99							35	237	7	267	97	80	92	79	266	1
	22	24	113	254	290	82	113	223	112	127							8	301	0	266	257	64	73	42	439	2
	106	8	2	186	295	174	8	241	375	89							61	355	15	169	193	8	50	6	338	0
	79	30	18	190	517	286	2	191	418	83							80	190	10	163	4	7	10	17	91	0
	189	39	60	67	621	120	6	203	105	105							63	76	2	148	20	49	23	8	293	2
	108	21	2	236	671	140	6	161	165	88							10	81	14	143	295	48	15	2	468	1
	74	21	76	153	831	269	2	226	183	186							15	112	1	217	277	7	2	18	153	2
	8	10	1	186	837	205	0	237	195	39							77	230	1	196	289	50	2	24	331	0
	58	22	94	80	824	64	20	109	214	10							56	186	2	177	351	15	0	13	155	0
	108	17	61	194	808	58	77	229	327	8							29	139	2	144	305	25	0	33	48	3
	30	34	54	147	556	187	41	163	131	40							34	129	0	129	268	41	0	24	155	0
	9	23	84	215	749	107	193	263	53	33							64	148	0	132	41	69	0	4	258	2
	78	45	186	208	971	59	358	211	46	87							53	151	0	81	182	62	0	6	132	0
	12	54	120	212	642	104	347	90	219	17							51	71	3	89	186	16	0	19	132	0
	7	53	81	323	927	282	289	72	409	4							91	106	0	99	135	1	0	0	95	0
	2	37	222	315	842	384	299	157	247	22							129	69	0	36	235	61	0	1	97	3
	24	60	385	294	819	462	299	94	121	40							165	98	0	67	246	105	0	0	263	10
	56	103	575	424	764	507	232	57	46	9							146	159	0	80	217	156	1	0	249	1
	79	116	649	602	569	478	290	123	117	16							186	99	0	102	170	218	0	2	181	0
	1	108	786	459	378	263	402	110	144	25							86	9	0	68	162	27	0	0	194	3
	21	99	630	472	485	149	376	267	143	35							13	13	0	92	216	56	1	0	232	34
	93	59	659	199	369	228	326	260	68	60							63	14	0	112	292	69	7	0	235	27
	112	94	622	451	235	266	282	312	39	146							25	5	0	77	319	119	4	0	220	1
	153	82	412	323	265	154	265	247	58	48							100	3	0	32	464	64	2	1	157	2
	162	57	503	390	71	127	207	309	166	76							55	0	0	80	363	55	7	0	160	1
	34	98	796	402	99	248	279	264	106	175							0	1	0	55	447	238	2	1	131	0
	123	89	819	301	52	130	353	290	37	163							23	0	0	38	332	227	5	2	125	3
	2	169	405	287	78	198	277	257	37	94							0	2	0	83	431	211	15	2	146	8
	38	88	571	317	122	169	178	252	0	73							6	0	0	91	457	185	18	13	184	0
	111	156	572	284	218	62	258	223	94	4							1	0	0	80	244	135	0	1	113	1
	31	138	297	512	313	244	165	205	204	77							3	2	0	43	487	88	0	1	117	6
	66	40	496	493	294	315	268	222	116	91							7	0	0	17	534	60	0	0	127	8
	145	104	810	340	204	375	484	253	18	64							6	0	0	22	590	159	19	2	60	4
	107	150	515	326	273	448	477	162	60	184							36	0	0	30	319	240	1	1	99	0
	12	119	412	179	128	364	443	97	58	141							14	0	0	66	599	204	14	2	110	1
	54	145	304	108	204	272	429	16	37	31							21	0	0	75	695	181	22	0	49	0
	105	82	194	203	342	282	246	17	98	67							32	0	0	101	195	191	1	0	29	0
	41	198	195	505	223	175	293	10	144	122							26	0	0	67	208	174	7	0	46	0
	92	179	359	458	326	200	207	22	29	73							18	0	0	108	409	175	0	0	39	5
	9	156	323	297	282	227	385	34	21	126							2	0	0	155	433	99	5	0	132	0
	11	69	185	302	165	103	445	9	3	191							28	0	0	216	422	117	19	0	363	2
	63	66	383	442	138	142	293	1	3	78							1	0	0	155	391	114	15	0	185	1
	54	74	326	467	20	190	206	20	9	175							0	0	0	111	510	179	22	1	272	0
	0	8	99	184	98	221	176	5	56	4							0	0	0	70	230	194	38	2	158	1
	5	10	95	263	191	200	342	9	11	13							0	0	0	78	480	138	2	0	95	0
	3	6	269	343	118	232	317	11	62	15							0	0	0	94	301	64	14	16	116	1
	2	13	207	38	140	335	179	12	32	9							0	0	0	79	385	41	5	1	26	1
	6	68	170	241	306	350	247	21	40	3							0	0	0	98	105	93	3	3	53	0
	13	30	54	32	43	144	187	6	4	13							0	0	0	142	239	22	5	0	122	1
	8	9	77	96	106	195	149	3	0	14							0	0	0	47	374	57	16	0	138	0
	0	46	269	78	152	210	104	19	2	29							0	0	0	14	493	185	4	0	72	3
	4	32	61	134	70	70	217	5	0	2							1	0	0	51	398	90	23	1	65	0
	3	9	83	200	79	54	155	2	17	60							0	0	0	157	312	41	7	1	29	1
	6	5	111	109	65	52	85	29	143	8							0	0	0	74	380	51	3	0	69	0
	17	10	64	36	75	77	55	41	232	4							0	0	0	88	361	18	15	0	77	0
	33	16	58	184	149	116	62	36	226	2							0	0	0	175	458	20	27	0	29	1
	7	1	289	8	136	179	79	33	239	10							0	0	0	124	549	6	18	0	26	1
	3	12	387	133	85	273	121	37	165	12							0	0	0	145	690	4	10	1	10	0
	2	6	198	39	248	267	190	55	99	0							0	0	0	60	510	3	11	0	80	1
	8	0	438	79	178	149	124	125	52	20							2	0	0	38	351	0	10	0	77	0
	1	0	183	171	45	141	102	89	35	4							0	0	0	30	306	3	3	0	58	0
	17	0	33	352	118	44	96	135	61	4							0	0	0	30	329	1	0	0	85	0
	6	0	384	315	12	39	118	135	81	5							1	0	0	15	368	2	1	0	182	0
	162	0	77	481	157	44	37	126	39	39							0	0	0	25	346	0	0	0	102	0
	278	10	54	558	266	86	9	104	165	191							0	0	0	16	316	0	0	0	178	0
	278	26	101	663	338	14	141	142	205	211							0	0	0	138	379	0	3	0	83	0
	160	37	23	573	442	83	184	86	400	268							0	0	0	134	403	2	1	0	81	0
	124	54	8	418	344	64	165	57	265	416							0	0	0	65	590	3	0	0	32	0
	131	28	10	433	277	47	190	46	196	386							0	0	0	69	575	0	2	2	10	1
	149	14	18	140	348	47	290	21	463	483							0	0	0	88	575	1	1	0	35	0
	130	17	31	272	279	15	238	12	595	545							1	0	0	121	651	0	0	0	41	0
	78	11	25	242	375	66	171	25	777	575							0	0	0	58	482	0	0	0	9	0
	107	37	8	366	429	43	169	36	787	418							2	0	0	150	456	0	0	0	9	0
	135	56	4	223	444	78	80	6	1137	362							9	0	0	78	486	0	11	0	2	0
	71	18	238	285	182	192	61	2	1346	389							10	0	0	27	686	0	19	0	47	0
	36	15	319	289	92	109	36	10	1416	86							11	0	0	8	680	0	61	0	15	0
	107	3	493	362	74	224	12	3	1130	90							20	0	0	5	614	4	14	0	17	0
	126	46	815	315	226	173	8	2	1059	227							5	0	0	9	336	0	18	0	13	2
	166	77	770	102	92	200	22	3	519	127							1	0	0	141	319	2	14	0	7	5
	87	56	668	240	187	188	41	24	408	16							7	0	0	145	346	0	14	0	21	1
	179	70	559	285	263	120	57	9	584	16							1	0	0	57	195	1	72	0	2	3
	68	56	323	318	314	34	75	40	678	17							7	0	0	48	117	10	84	0	54	4
	14	30	129	304	263	117	248	6	524	5							8	0	0	92	381	1	61	0	13	2
	12	4	266	331	195	101	265	53	633	0							5	0	0	135	396	0	39	1	0	11
	94	1	348	386	124	97	228	16	953	0							11	0	0	94	340	0	4	0	0	0
	70	2	326	224	183	56	237	34	907	0							16	0	0	37	144	1	6	0	55	2
	79	17	387	177	274	94	194	55	700	2							16	0	0	168	91	0	2	0	28	0
	118	4	136	259	318	8	55	69	564	0							12	0	0	119	154	1	2	0	11	0
	88	21	504	473	308	77	122	65	478	6							0	0	0	37	132	1	13	0	18	1
	73	43	123	409	332	82	201	41	308	2							12	0	0	12	211	0	3	1	12	1
	86	34	474	96	300	45	183	55	431	3							1	0	0	27	128	4	0	0	5	1
	16	44	495	442	261	24	152	37	435	0							7	0	0	168	146	3	2	0	1	2
	24	63	318	278	319	40	147	42	403	0							10	0	0	161	270	11	0	0	147	0
	41	8	109	260	151	127	69	54	309	3							27	0	0	57	549	5	6	0	266	0
	8	6	173	191	146	73	42	80	308	0							38	1	0	87	736	1	0	1	311	0
	66	26	341	83	255	106	48	190	420	5							9	0	0	128	501	1	0	0	256	0
	17	8	196	190	336	89	74	23	474	6							0	0	0	130	184	4	0	0	138	0
	40	22	237	274	309	87	149	6	493	33							1	0	0	49	303	5	0	0	57	0
	90	14	368	319	255	85	126	25	341	107							8	0	0	160	212	10	0	0	34	0
	82	26	552	137	161	36	174	56	358	122							12	0	0	105	273	35	0	0	23	0
	6	58	272	122	77	29	105	53	283	37							0	0	0	36	262	51	1	0	12	0
	45	35	260	52	133	86	83	25	170	17							0	0	0	11	182	28	1	0	46	0
	20	54	561	98	85	56	78	30	251	38							0	0	0	23	371	7	4	0	28	0
	27	36	825	100	200	12	73	110	414	49							0	0	0	4	531	12	9	0	46	0
	64	3	665	24	209	44	58	29	323	48							4	0	0	43	451	12	0	0	19	0
	32	33	785	146	169	117	109	17	139	53							0	0	0	186	423	7	0	0	2	0
	29	36	477	131	53	157	34	25	267	42							0	0	0	134	516	5	0	0	32	0
	68	40	562	83	61	116	8	19	231	48							0	0	0	66	561	4	4	0	138	0
	55	52	825	86	129	67	21	9	281	24							0	0	0	39	563	4	0	0	136	0
	40	17	860	168	140	115	30	11	530	16							0	0	0	77	290	4	0	0	14	0
	89	17	1540	195	102	173	39	7	423	0							0	0	0	113	144	0	0	1	38	0
	61	13	1325	210	66	211	24	19	418	1							0	0	0	144	108	0	0	0	14	0
	68	21	341	370	82	58	29	2	224	0							0	0	0	60	157	0	0	0	3	0
	84	100	405	533	71	50	15	3	357	0							0	0	0	138	116	0	0	1	0	0
	41	85	40	487	100	13	63	3	369	0							0	0	0	72	152	0	0	0	1	0
	19	13	144	425	74	6	41	0	483	8							4	0	0	40	295	0	0	0	9	0
	64	30	403	483	107	63	65	5	686	2							0	0	0	28	425	1	0	0	21	0
	89	30	134	423	58	0	50	1	486	0							0	0	0	29	520	2	0	0	46	0
	22	12	267	238	66	9	22	4	528	0							0	0	0	9	1084	1	0	0	94	0
	70	6	380	408	101	37	4	30	436	0							0	0	0	19	1423	0	0	3	118	0
	16	6	338	608	107	52	5	43	336	0							0	0	0	19	1417	4	0	0	56	0
	7	3	198	711	121	23	7	59	586	0							5	0	0	24	1131	0	0	0	7	0
	55	20	225	593	98	107	9	64	187	4							0	0	0	68	860	0	0	0	1	0
	29	13	201	383	81	92	15	77	430	0							0	0	0	103	1001	0	0	0	0	0
	1	0	182	572	66	247	20	112	285	5							0	0	0	63	1010	0	0	0	54	0
	10	27	9	626	44	171	10	74	148	1							0	0	0	82	742	0	1	0	45	0
	0	34	198	440	2	77	3	87	374	0							0	0	0	85	750	0	0	1	2	0
	1	14	290	475	3	64	6	33	502	0							0	0	0	77	738	0	0	0	2	0
	11	40	10	304	2	162	13	46	451	3							0	0	0	84	599	0	0	0	2	0
	7	26	127	434	35	333	4	57	267	2							0	0	0	135	568	0	0	0	2	0
	1	17	42	382	1	134	0	104	126	0							0	0	0	139	628	0	0	0	23	0
	6	27	107	528	19	135	0	82	94	46							0	0	0	70	515	0	0	0	44	0
	18	2	13	592	7	101	1	19	132	89							0	0	0	63	555	0	0	0	7	0
	0	33	129	499	8	137	3	27	203	86							4	0	0	46	498	0	0	0	18	0
	4	39	3	477	2	68	6	68	194	148							1	0	0	27	301	0	0	0	2	0
	9	4	83	477	11	24	19	101	194	83							0	0	0	9	483	0	0	0	1	0
	41	9	88	581	63	127	72	122	261	61							0	0	0	28	574	0	0	0	0	0
	5	23	37	523	111	111	110	139	49	121							0	0	0	59	217	0	2	0	0	0
	17	4	31	449	210	142	61	221	24	100							0	0	0	57	359	1	0	0	0	0
	0	11	5	506	160	121	79	285	79	247							1	0	0	50	353	1	0	1	42	0
	2	26	189	299	51	121	100	175	180	245							0	0	0	100	156	0	0	0	12	0
	0	0	6	385	95	130	129	146	223	210							0	0	0	151	216	0	0	0	10	0
	0	10	86	342	128	182	203	76	352	118							0	0	0	53	169	0	0	0	13	0
	0	4	420	281	107	194	144	192	236	50							0	0	0	10	104	0	0	0	35	0
	5	0	541	145	195	252	103	126	200	25							0	0	0	15	163	0	0	0	47	0
	7	42	428	130	277	201	91	159	261	133							0	0	0	36	46	0	0	0	20	0
	0	33	444	117	305	207	87	204	97	157							0	0	0	24	22	0	2	0	5	0
	3	5	199	131	245	139	34	148	187	183							0	0	0	53	62	0	1	0	2	0
	15	17	233	255	204	135	132	86	132	216							0	0	0	9	346	0	26	0	1	0
	0	33	461	427	41	77	136	107	127	140							0	0	0	25	354	0	16	0	4	0
	4	0	586	528	77	51	55	75	231	228							2	0	0	51	172	0	1	0	11	1
	0	0	547	453	155	41	113	62	231	419							0	0	0	144	105	0	1	0	38	5
	0	2	518	355	132	4	71	11	131	297							0	0	0	62	268	0	0	0	178	0
	10	4	456	263	87	3	61	12	130	157							0	0	0	24	291	0	0	0	334	4
	0	8	503	433	147	0	122	111	194	145							0	0	0	38	86	0	1	0	262	22
	0	2	866	490	66	3	77	121	224	260							0	0	0	64	229	0	0	0	168	1
	3	51	1122	411	103	4	140	111	138	171							0	0	0	64	214	0	0	0	68	6
	1	77	1086	599	154	0	219	76	172	190							0	0	0	79	177	0	0	0	62	3
	1	22	1018	520	165	0	143	68	455	194							0	0	0	47	40	0	0	0	31	10
	5	1	1128	828	123	1	171	344	472	193							0	0	0	19	150	0	0	0	16	39
	20	6	404	532	134	14	185	356	503	139							0	0	0	11	66	0	0	0	2	1
	0	0	446	576	152	2	30	151	300	131							1	0	0	9	142	0	0	0	3	5
	3	4	248	665	162	44	100	121	80	163							1	0	0	3	28	0	0	0	0	0
	0	6	166	497	62	12	32	127	168	217							2	0	0	4	230	0	0	0	0	0
	0	0	83	369	186	23	7	85	94	187							0	0	0	2	382	0	0	0	1	3
	8	0	180	273	278	55	39	61	139	135							0	0	0	6	206	0	0	0	2	0
	0	7	110	427	305	52	107	3	251	93							0	0	0	72	290	0	0	0	9	0
	0	3	395	417	318	90	24	31	226	145							0	0	0	63	230	0	0	0	2	0
	3	0	62	404	76	93	34	46	187	212							0	0	0	15	228	0	0	0	4	0
	1	10	26	242	204	187	65	76	313	94							0	0	0	18	113	0	0	0	17	0
	1	16	81	235	139	162	1	79	628	16							0	0	0	37	62	0	0	0	6	0
	5	3	29	202	89	104	3	37	540	145							0	0	0	23	43	0	0	0	3	0
	30	25	220	352	62	100	1	39	271	204							0	0	0	17	246	0	0	0	1	0
	0	17	117	276	227	66	0	161	306	68							0	0	0	18	2	0	0	0	0	0
	11	1	307	88	85	42	4	130	468	295							0	0	0	23	139	1	0	0	1	0
	85	5	199	239	190	58	12	138	418	285							0	0	0	18	7	0	0	0	0	0
	89	0	204	274	5	44	40	89	408	208							0	0	0	12	38	0	0	0	60	0
	194	2	373	49	16	52	215	93	170	173							0	0	0	11	133	0	0	0	70	0
	144	15	324	91	81	34	191	245	314	126							0	0	0	7	1	0	0	0	21	0
	107	52	204	342	27	24	174	206	268	141							0	0	0	13	1	7	0	0	0	0
	194	43	114	759	3	45	218	92	308	220							0	0	0	30	3	13	0	0	3	0
	168	85	271	832	1	64	160	196	341	191							4	0	0	13	12	7	0	0	0	0
	213	63	333	601	1	23	28	233	421	107							0	0	0	0	28	0	0	0	3	0
	185	34	432	418	3	24	71	202	502	153							0	0	0	0	5	0	0	0	61	0
	54	48	551	365	4	2	43	202	636	179							0	0	0	1	42	0	0	0	75	0
	12	12	375	288	19	29	12	107	399	98							0	0	0	6	12	0	0	0	12	0
	64	48	45	255	52	3	114	126	284	76							0	0	0	0	4	0	0	0	26	0
	93	0	133	339	11	3	263	160	185	149							0	0	0	4	1	0	0	0	101	0
	139	7	320	654	18	0	109	144	403	87							0	0	0	4	6	0	0	0	32	0
	108	84	195	471	1	3	191	335	466	146							0	0	0	10	7	0	0	0	38	0
	124	55	175	312	11	0	113	307	503	86							0	0	0	26	18	0	0	0	37	0
	112	49	369	460	6	2	118	133	545	125							0	0	0	80	1	0	1	0	27	0
	72	95	449	598	1	24	179	132	390	97							2	0	0	75	1	0	1	0	4	0
	60	89	404	601	3	6	155	55	559	153							0	0	0	59	6	0	2	0	8	0
	100	37	246	658	6	82	208	266	275	120							0	0	0	51	2	0	0	0	11	0
	113	62	309	480	9	97	338	163	538	37							0	0	0	58	7	0	1	0	2	0
	57	43	333	508	30	154	313	89	400	135							0	0	0	3	6	0	0	0	16	0
	70	24	283	715	49	79	193	93	423	159							0	0	0	4	2	0	0	0	0	0
	51	35	279	548	16	85	162	117	736	142							2	0	0	25	6	0	0	0	0	0
	70	17	34	334	98	10	172	34	656	132							0	0	0	0	4	0	0	0	30	0
	112	12	511	635	104	85	22	36	400	132							0	0	0	6	0	0	0	0	11	0
	59	32	548	603	119	168	28	145	237	100							0	0	0	6	1	0	4	0	1	0
	38	22	264	563	231	131	63	107	174	230							0	0	0	15	4	0	0	0	2	0
	144	37	87	360	233	60	61	265	257	89							0	0	0	2	0	0	0	0	5	0
	122	12	2	300	91	78	101	371	402	125							0	0	0	2	3	0	0	0	1	0
	112	0	75	174	161	69	22	212	226	144							0	0	0	26	8	0	1	0	32	0
	95	29	255	346	178	75	111	231	357	57							0	0	0	21	17	0	0	0	39	0
	42	33	149	285	91	80	75	217	426	40							0	0	0	10	25	0	0	0	37	0
	23	0	246	437	102	84	46	185	276	110							0	0	0	3	41	0	0	0	54	0
	35	3	248	400	145	73	60	202	102	27							6	0	0	4	16	0	0	0	4	0
	188	22	118	392	145	11	53	212	267	17							0	0	0	9	11	0	0	0	8	0
	123	20	110	446	176	1	25	206	505	35							0	0	0	6	12	0	0	0	5	0
	37	54	148	491	213	2	69	147	405	21							0	0	0	44	9	0	0	0	66	0
	123	10	359	444	236	0	89	140	395	23							0	0	0	90	6	0	0	0	18	0
	157	27	109	240	140	6	171	245	116	1							8	0	0	100	2	0	0	0	8	0
	69	43	464	278	96	10	136	294	221	51							0	0	0	93	35	0	0	0	17	0
	137	2	364	393	264	2	83	281	43	31							0	0	0	99	67	0	0	0	40	0
	174	2	86	422	162	0	23	211	278	5							0	0	0	23	48	0	0	0	24	0
	20	18	235	364	124	0	26	145	229	38							0	0	0	83	19	0	0	0	34	0
	152	3	311	220	230	0	72	63	669	151							0	0	0	50	23	0	0	0	5	1
	99	26	230	403	212	22	87	44	355	150							0	0	0	89	19	0	0	0	11	0

## Sheet: Motion traces_G5
G5_Trial1																G5_Trial10
	Mouse 1	Mouse 2	Mouse 3	Mouse 4	Mouse 5	Mouse 6	Mouse 7	Mouse 8	Mouse 9	Mouse 10							Mouse 1	Mouse 2	Mouse 3	Mouse 4	Mouse 5	Mouse 6	Mouse 7	Mouse 8	Mouse 9	Mouse 10
	95	5	100	0	230	578	36	44	36	145							0	0	0	0	0	0	0	0	0	0
	12	4	92	12	147	601	177	27	26	96							0	0	0	0	0	0	0	0	0	0
	116	16	113	1	81	722	140	23	56	159							0	4	0	0	0	0	0	0	0	0
	57	34	136	0	73	598	115	7	33	243							0	2	0	0	0	0	0	0	0	0
	117	71	270	6	76	401	200	101	29	276							0	1	0	0	0	0	0	0	0	0
	83	102	335	2	75	256	249	123	0	215							0	1	0	0	0	0	0	0	0	0
	37	110	346	0	42	242	273	77	4	126							0	2	0	0	0	0	0	0	0	0
	115	50	353	3	79	273	316	64	27	61							0	11	0	0	0	0	0	0	0	0
	97	69	457	2	46	374	130	133	16	96							0	1	0	0	0	0	0	0	0	0
	94	67	560	0	23	283	143	151	30	118							0	1	0	0	0	0	0	0	0	0
	31	64	519	18	29	269	261	126	46	121							0	4	0	0	0	0	1	0	0	0
	37	58	284	2	8	478	333	91	22	84							0	10	0	0	0	0	0	0	0	0
	72	88	297	1	33	402	450	126	1	47							0	2	0	0	0	0	0	0	0	0
	53	117	329	5	160	454	521	85	1	32							0	22	0	0	0	0	0	0	0	0
	54	139	166	0	63	267	345	88	0	15							0	2	0	0	0	0	0	0	0	0
	28	157	115	0	67	72	200	148	31	72							0	0	0	0	0	0	0	0	0	0
	8	130	80	7	52	97	227	123	33	28							0	0	0	0	0	0	0	0	0	0
	85	96	99	0	35	100	261	80	52	60							0	1	0	0	0	0	0	0	0	0
	201	130	127	13	62	108	280	76	64	101							0	6	0	0	0	0	0	0	0	0
	196	123	47	1	145	206	286	110	37	118							0	4	0	0	0	0	3	0	0	0
	170	166	78	0	73	154	261	48	104	172							0	0	0	0	0	0	0	0	0	0
	147	164	89	0	80	140	208	63	80	105							0	6	0	0	0	0	0	0	0	0
	137	197	90	0	137	102	215	9	95	20							0	1	0	0	0	0	1	0	0	0
	108	214	29	4	116	118	235	63	96	128							0	10	0	0	0	0	0	0	0	0
	205	266	71	14	59	190	222	106	125	96							0	19	0	0	0	0	0	0	0	0
	210	240	67	15	49	46	228	49	173	26							0	7	0	0	0	0	0	0	0	0
	203	236	53	30	60	71	133	19	223	58							0	6	0	0	0	0	0	0	0	0
	174	107	69	41	30	223	115	121	315	43							0	1	0	0	0	0	0	0	0	0
	189	230	111	14	112	147	97	156	375	127							0	0	0	0	0	0	0	0	0	0
	211	183	71	50	118	458	88	122	311	28							0	3	0	0	0	0	4	0	0	0
	330	202	81	13	70	518	70	98	299	59							0	0	0	0	0	0	0	0	0	0
	338	201	67	2	95	265	34	160	325	159							0	16	0	0	0	0	0	0	0	0
	336	189	54	29	129	235	85	123	175	129							0	8	0	0	0	0	0	0	0	0
	402	208	37	8	169	183	79	73	44	87							0	5	0	0	0	0	0	0	0	0
	436	114	89	28	163	169	133	91	150	27							0	0	0	0	0	0	0	0	0	0
	451	187	65	9	88	64	95	148	86	59							0	0	0	0	0	0	0	0	0	0
	458	207	63	7	169	124	148	201	201	13							0	1	0	0	0	0	0	0	0	0
	514	202	24	0	138	253	136	148	419	73							0	25	0	0	0	0	0	0	0	0
	418	96	62	0	172	350	209	40	539	40							0	3	0	0	0	0	0	0	0	0
	426	86	63	9	144	271	266	112	579	37							0	0	0	0	0	0	0	0	0	0
	282	161	83	0	169	347	329	91	574	85							0	0	0	0	0	0	0	0	0	0
	174	173	83	1	87	389	480	96	581	114							0	0	0	0	0	0	0	0	0	0
	153	79	65	22	92	287	329	113	530	120							0	1	0	0	0	0	0	0	0	0
	191	97	94	32	145	163	294	139	352	151							0	7	0	0	0	0	0	0	0	0
	91	121	54	62	69	217	469	123	274	98							0	4	0	0	0	0	0	0	0	0
	88	205	120	44	171	366	271	186	182	25							4	1	0	0	0	0	0	0	0	0
	28	330	53	26	181	481	68	222	165	47							3	0	0	0	0	0	0	1	0	0
	84	336	93	83	164	539	227	190	140	10							0	1	0	0	0	0	0	0	0	0
	74	206	87	127	173	784	294	145	181	0							0	14	0	0	0	0	0	1	0	0
	30	96	103	44	227	311	210	99	351	24							34	20	0	0	0	0	0	0	0	0
	188	41	72	33	261	161	193	67	523	40							15	3	0	0	0	0	0	0	0	0
	562	16	96	142	266	218	229	95	530	2							1	8	0	0	0	0	0	0	0	0
	913	15	54	198	234	251	149	121	387	44							2	2	0	0	0	0	0	0	0	0
	1048	19	189	230	244	394	75	106	470	71							18	0	0	0	0	0	0	0	0	0
	856	20	120	317	273	310	77	76	415	96							1	2	0	0	0	0	0	0	0	0
	446	23	93	178	301	322	88	128	468	15							1	0	0	0	0	0	0	0	0	0
	390	88	55	257	328	498	259	50	563	79							7	0	0	0	0	0	1	0	0	0
	293	91	164	266	355	551	137	24	611	51							19	0	0	0	0	0	0	1	0	0
	264	65	91	221	272	605	98	44	725	86							4	0	0	1	0	0	0	0	0	0
	211	53	113	107	175	402	133	23	731	181							13	5	0	0	0	0	0	0	0	0
	293	50	49	176	247	317	160	5	436	99							20	6	0	0	0	0	0	0	0	0
	211	40	121	203	420	193	186	6	203	174							49	5	0	0	0	0	0	0	1	0
	193	39	91	181	346	306	49	9	195	115							34	9	0	0	0	0	0	0	0	0
	136	19	117	87	305	502	128	3	99	46							63	3	0	0	0	0	0	0	0	0
	159	39	70	137	325	770	80	7	51	140							60	1	0	0	0	0	0	0	0	0
	103	80	159	125	375	715	41	20	282	69							50	1	0	0	0	0	0	0	0	0
	143	9	107	258	321	465	17	10	110	129							78	3	0	0	0	0	0	0	0	0
	266	49	106	308	392	619	152	3	62	172							56	4	0	0	0	0	0	0	0	0
	286	34	46	244	397	260	176	12	8	260							69	1	0	0	0	0	0	0	0	0
	215	13	107	197	373	351	65	0	123	170							58	3	0	0	0	0	0	0	0	0
	168	14	66	231	413	508	56	4	348	157							108	0	0	0	0	0	1	0	0	0
	226	13	134	257	492	433	95	16	511	110							65	1	0	0	0	0	0	0	0	0
	248	12	83	275	350	556	102	46	520	146							3	2	0	0	0	0	0	0	0	0
	273	3	161	202	363	592	198	5	582	181							24	3	0	0	0	0	0	0	0	0
	139	8	79	113	197	568	186	33	653	176							2	0	0	0	0	0	0	0	0	0
	214	12	123	219	398	664	185	57	294	172							17	1	0	0	0	0	0	0	0	0
	332	15	36	278	352	400	206	18	267	143							45	0	0	0	0	0	0	0	0	0
	303	52	115	284	301	612	29	172	180	90							26	0	0	0	0	0	0	0	0	0
	172	98	68	217	269	669	142	193	148	68							22	0	0	0	0	0	0	0	0	0
	148	73	150	253	362	473	66	211	209	26							11	27	0	0	0	0	0	0	0	0
	115	27	87	260	204	375	167	151	276	130							7	28	0	0	0	0	0	0	0	0
	139	43	217	228	235	548	263	139	365	229							109	0	0	0	0	0	0	0	0	0
	133	64	123	179	256	464	126	192	233	288							110	8	0	0	0	0	0	0	0	0
	96	38	174	306	308	431	100	155	125	487							0	0	0	0	0	0	0	0	0	0
	137	19	68	353	330	108	172	156	201	391							19	0	0	0	0	0	0	0	0	0
	52	5	118	340	202	119	143	94	313	252							10	0	0	0	0	0	0	0	0	0
	12	0	112	347	229	137	86	128	235	152							53	0	0	0	0	0	0	0	0	0
	106	0	77	312	369	184	109	205	304	177							137	0	0	0	0	0	0	0	0	0
	237	0	212	282	323	232	113	257	295	216							190	0	0	0	0	0	0	0	0	0
	228	29	199	368	434	228	198	222	277	155							227	0	0	0	0	0	0	0	0	0
	198	27	74	415	392	188	131	207	83	250							238	0	0	0	0	0	2	0	0	0
	250	97	180	390	204	288	88	167	225	313							217	0	0	0	0	0	0	0	0	0
	232	160	113	307	339	408	104	196	157	251							190	25	0	0	0	0	2	0	0	0
	74	116	102	238	325	342	34	269	37	290							134	0	0	0	0	0	0	0	0	0
	151	82	127	167	264	305	80	232	25	206							203	2	0	0	0	0	0	0	0	0
	58	30	62	227	284	432	77	164	24	69							161	2	0	0	0	0	0	0	0	0
	177	44	182	133	277	569	187	184	29	105							81	0	0	0	0	0	0	0	0	0
	70	150	115	185	376	553	332	232	74	97							36	0	0	0	0	0	0	0	1	0
	91	225	87	128	345	547	336	260	43	187							49	0	0	0	0	0	0	0	0	0
	98	209	103	201	364	454	341	216	28	169							71	0	0	0	0	0	0	0	0	0
	155	208	149	274	304	363	216	310	15	131							50	0	0	0	0	0	0	0	0	0
	45	49	219	343	157	374	390	391	24	75							14	0	0	0	0	0	0	0	0	0
	4	57	95	353	357	330	182	327	226	55							56	1	0	0	0	0	0	0	0	0
	48	151	188	239	367	291	247	242	152	86							38	0	0	0	0	0	0	0	0	0
	86	18	100	235	312	176	251	335	59	4							90	0	0	0	0	0	0	0	0	0
	43	105	130	271	488	300	177	301	27	7							127	0	0	0	0	0	0	0	0	0
	120	70	57	352	498	346	159	269	102	5							113	0	0	0	0	0	0	0	0	0
	132	239	88	333	408	281	133	263	123	6							100	0	0	0	0	0	0	0	0	0
	65	305	237	315	460	113	132	321	69	12							47	0	0	0	0	0	0	0	0	0
	160	401	193	306	489	171	449	267	96	94							30	0	0	0	0	0	0	0	0	0
	205	453	158	227	545	148	444	326	27	269							84	0	0	0	0	0	0	0	0	0
	150	283	96	235	420	175	123	155	58	357							45	0	0	0	0	0	0	0	0	0
	48	146	215	250	443	319	368	156	13	375							15	0	0	0	0	0	0	0	0	0
	85	172	128	238	720	372	299	275	62	292							67	0	0	0	0	0	0	0	0	0
	45	324	160	223	456	376	104	335	29	175							134	0	0	0	0	0	0	0	0	0
	31	423	123	138	286	209	135	424	57	187							105	0	0	0	0	0	0	0	0	0
	43	459	114	70	233	172	103	262	161	167							82	0	0	0	0	1	0	0	0	0
	20	327	266	138	238	206	190	178	283	118							116	0	0	0	0	0	0	0	0	0
	97	257	244	264	191	372	389	249	361	98							55	0	0	0	0	0	0	0	0	0
	71	394	141	201	323	366	148	262	360	156							156	0	0	0	0	1	0	0	0	0
	18	421	168	224	206	318	292	307	661	144							192	0	0	0	0	0	0	0	0	0
	10	467	153	157	373	242	115	402	482	150							6	0	0	0	0	0	0	0	0	0
	33	477	180	82	240	105	63	481	544	110							138	0	0	0	0	1	0	0	0	0
	38	424	183	25	420	122	159	489	332	194							216	0	0	0	0	0	0	0	0	0
	3	395	202	6	462	81	146	466	257	269							145	0	0	0	0	0	0	0	0	0
	52	399	275	62	421	206	94	606	329	230							52	0	0	0	0	0	0	0	0	0
	25	299	286	21	560	42	93	500	269	82							65	0	0	0	0	0	0	0	0	0
	56	205	265	46	498	56	100	559	345	26							14	0	0	0	0	0	0	0	0	0
	17	155	337	99	536	65	111	547	591	45							14	0	0	0	0	0	0	0	0	0
	72	174	459	85	391	32	98	397	645	20							28	0	0	0	0	0	0	0	0	0
	62	145	577	17	456	69	109	183	480	25							16	0	0	0	0	1	0	0	0	0
	31	138	532	2	416	11	119	56	447	49							10	0	0	0	0	0	0	0	1	0
	53	77	399	51	226	46	95	107	238	21							7	0	0	0	0	2	0	0	0	0
	67	109	242	1	289	44	86	201	190	35							0	0	0	0	0	0	0	0	0	0
	44	115	349	15	257	78	55	282	239	45							7	1	0	0	0	0	0	0	0	0
	1	130	502	8	164	102	117	330	284	4							29	0	0	0	0	0	0	0	0	0
	31	96	534	8	217	114	97	375	177	3							24	0	0	0	0	0	0	0	0	0
	40	125	455	12	197	163	95	430	75	0							45	0	0	0	0	0	0	0	0	0
	0	138	455	49	91	74	64	468	34	8							1	0	0	0	0	0	0	0	0	0
	40	127	552	5	222	18	59	508	81	0							12	0	0	0	0	0	0	0	0	0
	0	408	584	30	248	57	10	507	114	6							16	0	0	0	0	0	0	0	0	0
	24	646	557	5	173	99	78	452	102	12							47	0	0	0	0	0	0	0	0	0
	46	728	502	27	138	126	26	460	90	3							38	0	0	0	0	0	4	0	0	0
	4	818	419	108	132	68	56	549	108	13							32	0	0	0	0	0	0	0	0	0
	10	634	367	83	128	146	62	424	270	0							22	0	0	0	0	0	0	0	0	0
	69	592	186	41	192	66	79	460	177	9							12	0	0	0	0	0	0	0	0	0
	135	550	601	7	268	109	43	469	150	0							19	0	0	0	0	0	0	0	0	0
	120	556	545	0	313	134	57	421	93	0							26	0	0	0	0	0	0	0	0	0
	115	389	456	56	386	173	102	491	161	3							9	0	0	0	0	0	0	0	0	0
	67	370	459	81	329	168	31	584	10	0							0	0	0	0	0	0	0	0	0	0
	191	251	469	50	341	182	47	401	67	17							17	0	0	0	0	0	0	0	0	0
	136	316	449	39	416	70	62	583	10	25							56	0	0	0	0	0	0	0	0	0
	18	314	628	85	329	293	38	485	13	12							37	0	0	0	0	0	0	0	0	0
	54	363	642	152	192	176	213	317	117	2							0	0	0	0	0	0	0	0	0	0
	92	457	629	134	299	261	67	487	159	0							7	0	0	0	0	0	0	0	0	0
	163	600	743	143	239	308	28	239	256	3							2	0	0	0	0	0	0	0	0	0
	130	435	706	155	283	131	65	231	246	0							2	0	0	0	0	0	0	0	0	0
	116	221	859	56	276	80	45	322	272	1							1	0	0	0	0	0	0	0	0	0
	252	303	949	32	117	85	31	233	130	7							10	0	0	0	0	0	0	0	0	0
	375	215	745	0	158	71	8	254	310	17							3	0	0	0	0	0	0	0	0	0
	300	166	556	20	233	62	51	325	265	17							6	0	0	0	0	0	0	0	0	0
	233	357	614	9	167	74	27	256	265	3							3	0	0	0	0	0	2	0	0	0
	295	566	823	10	204	69	26	155	27	14							0	0	0	0	0	0	0	0	0	0
	324	660	808	22	253	26	60	78	44	9							0	0	0	0	0	0	0	0	0	0
	217	658	802	144	394	30	32	116	82	3							0	0	0	0	0	0	0	0	0	0
	252	501	869	143	237	136	47	134	187	1							0	1	0	0	0	0	0	0	0	0
	304	445	760	186	90	68	11	48	294	4							1	0	0	0	0	0	0	0	0	0
	285	263	805	236	117	101	46	177	337	8							1	0	0	0	0	0	0	0	0	0
	410	32	869	200	149	79	88	227	212	3							5	0	0	0	0	0	0	0	0	0
	421	182	1010	196	124	35	30	219	143	10							0	0	0	0	0	0	0	0	0	0
	389	348	1100	134	109	73	116	200	119	10							0	0	0	0	0	0	0	0	0	0
	415	807	982	139	91	188	24	106	47	0							0	0	0	0	0	0	0	0	0	0
	264	1153	915	156	80	20	19	66	45	0							0	0	0	0	0	0	0	0	0	0
	97	1193	752	264	266	34	71	17	120	10							0	0	0	0	0	0	0	1	0	0
	136	949	598	325	107	23	52	36	111	8							2	0	0	0	0	0	0	0	0	0
	224	755	688	343	256	55	14	248	173	7							0	0	0	0	0	0	0	2	0	0
	295	785	620	386	352	39	6	337	283	0							0	0	0	0	0	0	0	0	0	0
	271	555	326	397	466	30	34	304	271	0							0	0	0	0	0	0	0	0	0	0
	134	368	290	389	635	3	17	115	72	19							0	0	0	0	0	0	0	1	0	0
	170	422	591	338	880	3	5	118	239	25							0	0	0	0	0	0	0	0	0	0
	290	378	846	335	884	3	61	102	282	34							0	0	0	0	0	0	0	5	0	0
	314	298	1205	456	616	0	174	35	114	42							0	0	0	0	0	0	0	0	0	0
	189	249	1461	587	548	5	104	80	157	34							0	0	0	0	0	0	0	1	0	0
	251	152	1466	495	661	5	139	231	52	48							0	0	0	0	0	0	0	1	0	0
	343	62	1321	424	695	0	122	69	130	104							0	0	0	0	0	0	0	0	0	0
	442	167	1388	413	971	0	112	106	203	211							0	0	0	0	0	0	0	0	0	0
	460	103	1140	372	957	0	38	94	288	300							0	0	0	0	0	0	0	2	0	0
	448	142	1026	335	918	0	10	30	154	239							0	0	0	0	0	0	0	3	0	0
	297	57	424	313	627	160	174	30	306	208							0	0	0	0	0	0	0	0	0	0
	302	172	645	336	678	253	111	33	330	172							0	0	0	0	0	0	1	0	0	0
	389	179	539	351	525	244	104	54	508	118							0	0	0	0	0	0	0	0	0	0
	294	60	462	348	549	174	145	113	464	91							0	0	0	0	0	0	0	0	0	0
	189	72	355	270	393	163	67	129	399	106							0	0	0	0	0	0	0	0	0	0
	227	37	353	267	285	150	147	29	233	100							0	0	0	0	0	0	0	0	0	0
	272	132	551	69	49	263	34	40	163	54							0	0	0	1	0	0	0	0	0	0
	226	199	726	234	120	338	129	28	236	25							0	0	0	2	0	0	0	1	0	0
	172	186	676	237	173	209	27	75	150	37							0	0	0	1	0	0	2	0	0	0
	139	222	775	283	172	277	8	81	113	58							0	0	0	1	0	0	0	0	0	0
	169	267	685	227	323	306	62	55	91	49							0	0	0	0	0	0	0	0	0	0
	206	346	645	207	376	367	18	93	33	26							0	0	0	1	0	0	0	0	0	0
	294	155	768	188	243	470	0	93	55	28							0	0	0	3	0	0	0	0	0	0
	490	161	723	202	94	341	64	219	180	69							0	0	0	8	0	0	0	0	0	0
	791	190	796	172	109	369	240	203	241	94							0	0	0	24	0	0	0	0	0	0
	773	372	972	265	169	318	402	235	286	118							0	0	0	47	0	0	0	0	0	0
	583	312	807	325	353	534	469	74	204	68							0	0	0	18	0	0	0	0	0	0
	479	242	829	249	342	565	448	46	67	82							0	0	0	8	0	0	0	0	0	0
	448	196	874	219	294	474	197	37	39	96							0	0	0	55	0	0	0	0	0	0
	198	101	1109	216	260	655	232	135	112	76							0	0	0	47	0	0	0	0	0	0
	232	135	1143	286	364	565	196	32	96	148							0	0	0	69	0	0	0	0	0	0
	62	75	1023	257	349	256	262	92	141	92							0	0	0	73	0	0	0	0	0	0
	84	93	840	99	374	387	159	161	212	63							0	0	0	16	0	0	0	0	0	0
	40	152	840	74	332	524	241	138	127	24							0	0	0	40	0	0	0	0	0	0
	60	121	903	140	199	530	237	60	160	39							0	0	0	11	0	0	1	0	0	0
	94	110	809	110	265	603	212	135	153	56							0	0	0	6	0	0	0	0	0	0
	121	290	899	49	93	516	202	17	291	20							0	0	0	18	0	0	0	0	0	0
	132	75	795	155	181	457	286	65	281	37							0	0	0	22	0	0	0	0	0	0
	177	104	668	149	243	492	117	30	210	49							0	0	0	24	0	0	0	0	0	0
	160	204	613	222	271	452	99	149	82	15							0	0	0	49	0	0	0	0	0	0
	139	100	430	275	216	442	59	36	180	10							0	0	0	111	0	0	0	0	0	0
	64	0	350	301	161	539	60	108	140	23							0	0	0	119	0	0	0	0	0	0
	163	15	295	306	227	536	112	82	164	32							0	0	0	76	0	0	0	0	0	0
	241	32	337	348	233	532	103	85	98	57							0	0	0	75	0	0	0	0	0	0
	289	177	383	442	58	669	256	103	120	84							0	0	0	38	0	0	0	0	0	0
	268	57	603	339	257	377	193	19	184	6							0	0	0	31	0	0	0	0	0	0
	273	82	890	320	200	445	189	91	206	7							0	0	0	19	0	0	0	0	0	0
	130	116	885	306	235	323	164	46	319	68							0	0	0	21	0	0	0	0	0	0
	101	75	670	383	93	380	170	47	191	22							0	0	0	3	0	0	0	0	0	0
	67	11	652	238	196	365	168	42	175	63							0	0	0	7	0	0	0	0	0	0
	45	111	386	288	257	49	169	37	363	30							0	0	0	4	0	0	0	0	0	0
	106	173	199	230	309	414	139	49	267	29							0	5	0	5	0	0	0	0	0	0
	70	79	460	216	401	615	138	120	212	13							0	8	0	11	0	0	0	0	0	0
	48	122	596	208	230	901	40	75	350	11							0	0	0	6	0	0	7	0	0	0
	46	160	808	94	71	962	19	34	303	20							0	2	0	3	0	0	0	3	0	0
	66	248	1002	128	75	1000	154	26	253	35							0	0	0	0	0	0	0	0	0	0
	48	417	1048	170	201	1087	423	22	192	37							0	1	0	0	0	0	0	2	0	0
	40	470	946	96	293	816	423	48	290	65							0	0	0	2	0	0	0	3	0	0
	47	251	998	187	285	362	371	0	379	19							0	0	0	1	0	0	0	0	0	0
	83	439	1060	140	131	257	339	16	484	35							0	0	0	0	0	0	0	6	0	0
	131	345	814	11	159	327	380	16	560	17							0	0	0	0	0	0	0	3	0	0
	217	248	860	19	283	252	368	4	679	10							0	0	0	0	0	0	0	0	0	0
	183	343	784	64	321	173	91	37	736	25							0	0	0	0	0	0	0	0	0	0
	125	333	827	6	300	253	107	29	648	22							0	0	0	0	0	0	0	1	0	0
	108	333	845	6	373	290	155	13	542	30							0	0	0	0	0	0	0	0	0	0
	138	299	928	30	503	262	100	19	413	21							0	0	0	0	0	0	0	0	0	0
	176	222	828	129	779	246	314	5	249	3							10	0	0	0	0	0	0	0	0	0
	191	345	569	122	739	178	236	34	179	27							68	0	0	5	0	0	0	0	0	0
	106	260	396	137	455	167	112	42	307	56							109	0	0	26	0	0	0	0	0	0
	167	164	689	34	575	69	140	11	369	63							24	0	0	6	0	0	0	0	0	0
	170	68	802	185	672	59	116	11	535	1							46	0	0	1	0	0	0	0	0	0
	87	304	682	127	621	72	92	3	455	3							40	0	0	12	0	0	0	0	0	0
	69	250	472	100	585	54	23	2	299	46							32	0	0	4	0	0	0	0	0	0
	96	26	528	248	578	195	41	4	140	147							84	0	0	5	0	0	0	1	0	0
	57	170	439	233	472	228	160	10	150	180							176	0	0	7	0	0	0	0	0	0
	214	218	718	139	375	131	45	12	64	174							253	0	0	21	0	0	0	0	0	0
	454	215	730	102	496	145	94	3	21	150							217	0	0	28	0	0	0	0	0	0
	387	56	454	120	288	161	55	34	4	132							220	0	0	12	0	0	0	0	0	0
	591	30	397	68	694	235	18	94	39	190							124	0	0	19	0	0	0	0	0	0
	673	55	532	48	645	124	144	105	159	221							112	0	0	2	0	0	0	0	0	0
	335	106	590	62	357	106	78	21	110	194							88	0	0	4	0	0	0	0	0	0
	326	93	662	86	269	25	124	78	181	164							37	0	0	23	0	0	0	0	0	0
	395	14	594	36	581	32	545	43	71	154							21	0	0	6	0	0	1	0	0	0
	234	148	578	14	435	245	222	19	43	138							115	0	0	11	0	0	0	0	0	0
	157	52	525	15	558	286	442	76	45	88							137	0	0	18	0	0	0	0	0	0
	167	131	299	5	492	202	307	141	77	155							34	0	0	13	0	0	1	0	0	0
	92	102	319	31	407	170	246	111	20	75							19	0	0	0	0	0	0	0	0	0
	68	63	196	9	239	193	204	125	121	112							72	0	0	1	0	0	0	0	0	0
	37	121	267	8	195	269	110	133	175	188							66	0	0	1	0	0	0	0	0	0
	124	183	202	11	307	150	248	257	276	189							27	0	0	5	0	0	0	0	0	0
	75	186	105	3	415	152	133	305	194	112							39	4	0	15	0	0	0	0	0	0
	51	255	218	9	459	202	159	310	515	151							67	1	0	2	0	0	0	0	0	0
	254	312	90	75	377	236	265	311	605	256							46	0	0	16	0	0	0	0	0	0
	375	406	76	3	240	57	246	312	696	251							55	0	0	17	0	0	0	0	0	0
	493	363	68	63	268	192	485	379	684	218							7	0	0	6	0	0	0	0	0	0
	564	87	214	109	292	96	265	344	563	241							1	0	0	4	0	0	0	0	0	0
	308	16	243	59	305	197	581	285	538	194							9	1	0	4	0	0	0	1	0	0
	370	154	44	130	409	168	464	278	456	297							0	0	0	11	0	0	0	0	0	0
	539	7	195	104	572	19	461	375	391	253							14	1	0	6	0	0	0	0	0	0
	367	22	102	122	548	71	347	350	512	164							31	1	0	2	0	0	0	0	0	0
	421	8	180	86	496	33	524	445	540	144							45	0	0	0	0	0	0	0	0	0
	548	35	61	125	402	7	577	645	560	160							37	0	0	7	0	0	0	0	0	0
	539	83	109	138	306	10	524	561	622	226							12	0	0	9	0	0	0	0	0	0
	565	8	144	51	398	7	261	682	577	244							14	39	0	15	0	0	0	0	0	0
	555	16	28	128	224	4	88	629	445	262							19	17	0	8	0	0	0	0	0	0
	585	8	68	215	264	29	157	604	260	149							8	17	0	9	0	0	0	0	0	0
	664	21	135	168	111	32	337	735	268	95							17	30	0	4	0	0	0	0	0	0
	658	3	102	94	244	14	503	779	303	113							24	0	0	0	0	0	0	2	0	0
	700	8	66	6	279	78	333	699	240	130							6	1	0	0	0	0	0	2	0	0
	727	1	123	47	220	0	244	663	121	129							1	3	0	0	0	0	0	0	0	0
	702	6	95	118	235	25	210	491	53	149							11	2	0	1	0	0	0	0	0	0
	568	0	98	34	299	13	206	315	79	186							0	2	0	0	0	0	0	0	0	0
	465	20	157	175	303	32	129	372	91	139							3	0	0	0	0	0	0	0	0	0
	469	17	331	178	719	60	75	472	46	147							9	0	0	0	0	0	0	0	0	0
	474	0	541	318	1117	99	51	509	8	191							4	1	0	0	0	0	0	0	0	0
	520	0	645	392	1065	139	148	263	134	203							7	1	0	0	0	0	0	2	0	0
	637	0	571	398	964	143	131	186	124	181							20	0	0	0	0	0	0	2	0	0
	648	0	765	313	968	48	128	194	72	93							8	2	0	0	0	0	1	2	0	0
	493	37	818	252	737	101	160	219	122	66							0	0	0	0	0	0	0	1	0	0
	798	9	628	358	555	245	177	388	44	46							7	2	0	0	0	0	0	5	0	0
	710	3	705	295	524	32	94	230	104	70							18	0	0	0	0	0	0	0	0	0
	617	72	705	259	557	51	141	220	110	44							27	0	0	0	0	0	0	0	0	0
	700	123	892	208	579	8	205	266	208	104							33	0	0	0	0	0	0	1	0	0
	829	94	853	230	690	92	332	237	158	173							46	0	0	0	0	0	0	8	0	0
	1009	66	712	377	581	52	295	372	333	165							79	0	0	0	0	0	0	5	0	0
	1123	51	651	407	596	22	136	761	563	80							49	0	0	0	0	0	0	8	0	0
	959	6	535	438	464	24	66	1086	730	207							5	3	0	0	0	0	0	15	0	0
	1089	40	632	539	655	30	195	1415	658	406							0	37	0	4	0	0	4	0	6	0
	1013	44	744	445	509	57	192	1341	469	347							9	68	1	23	0	99	17	3	1	2
	932	15	654	361	425	10	285	1056	388	232							20	144	5	6	4	140	36	80	40	0
	1209	5	920	539	344	19	351	503	353	147							7	112	16	18	0	89	106	189	4	0
	1416	23	1051	600	419	189	439	465	354	85							27	66	10	46	0	28	247	206	63	5
	851	13	1048	548	338	110	444	404	320	143							67	65	1	22	0	40	52	205	93	2
	986	2	1177	543	364	84	356	323	443	126							59	20	3	37	0	36	39	164	96	0
	899	10	835	441	408	326	552	227	471	163							49	51	0	54	0	13	189	195	23	5
	1126	51	832	295	268	236	711	195	456	179							26	292	0	23	0	28	187	210	11	1
	995	12	729	424	172	126	608	236	448	254							31	701	0	11	0	15	72	178	7	0
	1061	5	596	407	183	115	658	246	331	272							5	1059	0	6	0	27	247	226	11	3
	1054	17	489	506	97	88	423	97	257	272							0	1497	0	3	0	36	34	233	4	3
	1033	37	213	610	71	59	714	104	264	292							1	2272	0	5	0	28	36	322	5	0
	945	11	206	470	32	135	912	124	325	268							1	1922	0	1	0	0	171	406	4	0
	794	18	289	715	222	41	917	144	246	216							19	2249	0	17	0	9	63	353	11	0
	860	18	349	773	212	97	934	105	217	201							6	1821	1	22	0	3	58	466	1	0
	387	34	169	646	26	5	889	56	102	224							17	1302	0	0	0	0	134	597	0	0
	320	88	190	587	123	61	863	151	36	103							2	1155	0	5	0	3	0	712	0	0
	370	99	275	578	77	10	891	143	16	65							1	810	0	0	0	0	61	647	0	0
	373	152	308	741	152	21	651	46	50	148							0	633	0	2	0	0	4	872	0	0
	136	195	199	771	132	1	675	40	48	122							1	460	0	1	0	0	68	1314	0	0
	306	165	319	734	162	1	396	113	48	101							0	545	0	1	0	0	32	1300	0	0
	246	223	282	252	74	0	834	202	60	149							0	461	0	0	0	0	32	1000	1	0
	237	232	347	345	20	2	936	250	16	156							0	486	0	0	0	0	50	902	3	0
	103	240	472	318	169	73	980	55	44	177							0	532	0	0	0	0	0	778	0	0
	159	237	859	238	286	99	1153	97	122	126							0	460	5	1	0	0	8	567	0	0
	48	251	1021	132	268	83	674	133	21	30							0	557	10	1	0	2	1	446	0	0
	45	257	610	377	185	81	982	132	64	29							0	577	10	0	0	0	24	216	0	0
	129	163	425	371	160	18	599	21	19	49							0	540	9	0	0	0	0	214	0	0
	201	195	399	126	306	23	689	150	41	51							0	415	0	0	0	0	0	241	0	0
	189	288	271	176	69	87	770	13	83	29							0	272	1	0	0	0	9	135	8	0
	39	334	459	84	47	19	722	31	0	75							0	501	1	7	0	24	117	104	3	0
	101	284	763	138	127	119	451	72	38	110							0	451	3	7	0	57	178	115	7	0
	156	258	1215	37	302	54	384	76	151	185							0	399	5	2	0	47	85	122	12	0
	37	205	1145	84	173	71	469	156	261	370							0	320	14	3	1	31	13	100	6	0
	285	131	1481	81	118	21	885	76	242	367							0	519	25	6	17	0	74	157	1	0
	282	204	1642	92	59	94	970	50	179	399							0	539	15	0	2	1	97	90	1	0
	34	314	1440	109	43	74	1050	220	337	400							0	502	22	0	36	22	435	155	0	0
	114	318	1140	134	19	67	1311	51	472	213							0	520	11	1	50	34	1437	61	0	0
	27	170	964	115	61	83	739	139	584	187							0	640	10	1	12	38	1739	61	0	0
	173	76	990	175	151	48	617	67	744	152							0	561	2	0	50	11	1183	108	1	0
	513	54	783	87	227	8	479	48	535	130							0	421	2	1	97	7	1136	100	0	0
	534	11	1035	50	54	24	861	61	572	239							0	413	0	0	105	0	1088	93	0	0
	401	38	1119	154	58	63	919	78	500	331							0	359	0	0	152	12	1163	72	0	0
	626	77	1278	161	22	237	1107	88	715	350							0	537	5	0	153	4	1222	70	0	0
	677	82	1353	99	74	190	1044	83	646	361							0	595	1	1	168	0	1235	33	1	0
	631	52	1704	39	52	133	538	132	839	323							0	495	2	0	185	1	1129	11	6	0
	804	64	1588	165	13	181	454	123	591	321							0	180	0	0	162	0	979	6	1	0
	838	110	1214	138	294	205	643	146	446	308							0	295	0	0	187	0	948	7	0	0
	753	177	1023	71	61	423	610	159	306	301							0	322	0	1	183	0	757	7	0	0
	752	156	835	188	22	464	523	120	202	435							0	249	1	0	189	0	659	11	0	0
	767	87	928	578	116	299	596	63	133	392							0	1345	0	0	123	0	794	2	0	0
	780	33	619	710	17	290	669	70	132	417							0	2370	0	0	158	0	836	2	0	0
	607	13	365	614	41	326	741	148	82	414							0	3125	6	0	236	0	693	9	0	0
	408	31	484	450	173	368	364	34	0	378							0	1581	16	0	297	0	427	30	0	0
	488	27	535	78	9	325	485	102	5	236							0	1672	21	0	268	0	91	0	0	0
	229	16	416	112	88	286	311	165	13	267							0	1949	32	1	166	0	89	15	0	0
	522	17	423	95	37	192	338	63	6	222							0	1592	15	0	230	0	52	27	0	0
	413	30	450	80	255	335	464	126	1	285							0	2172	22	0	203	0	145	4	0	0
	515	24	273	25	17	411	367	29	17	219							0	2849	19	0	99	0	193	0	0	0
	584	67	105	54	209	171	402	82	47	205							0	3499	0	5	96	0	145	30	11	0
	543	35	76	101	176	262	494	209	14	229							0	3165	2	4	144	0	494	49	4	2
	655	14	234	133	72	126	319	265	115	464							0	1497	33	14	232	10	811	65	7	0
	554	11	264	185	43	106	209	264	429	367							0	625	165	3	266	1	742	101	0	0
	665	33	436	285	490	40	237	216	421	262							0	189	375	2	353	1	679	105	2	0
	966	40	509	316	482	95	331	244	360	240							0	269	237	3	503	4	709	90	0	0
	1063	31	327	603	332	132	275	267	263	211							0	292	295	75	418	5	615	88	2	0
	726	1	231	656	349	242	237	266	480	266							0	327	344	112	269	0	436	36	0	0
	419	2	155	674	94	266	331	181	467	380							0	353	385	81	121	4	395	12	0	0
	446	34	281	418	78	388	290	521	362	600							0	264	499	39	155	3	578	20	0	2
	553	11	294	354	84	286	299	616	390	464							0	264	701	8	243	0	449	10	0	0
	381	24	429	126	365	417	171	720	375	487							0	222	674	1	277	0	501	6	0	0
	500	0	520	228	425	478	58	462	385	284							0	177	832	0	389	3	662	0	0	2
	566	23	822	158	86	305	42	272	379	141							0	226	986	0	407	0	382	7	0	0
	569	15	1223	204	87	368	45	184	308	430							0	338	1138	9	138	11	481	0	0	0
	581	0	1350	299	145	365	156	193	271	212							0	290	1011	1	272	0	168	0	0	0
	456	1	1203	357	147	197	278	92	343	310							0	249	1371	1	87	3	296	8	0	0
	275	0	1140	710	121	102	511	191	199	227							0	247	1828	0	133	0	170	7	0	0
	251	0	1198	867	135	209	565	130	10	399							0	213	2173	0	59	0	118	0	0	0
	142	0	1366	1188	231	197	536	73	14	711							0	201	2792	0	69	0	49	3	0	0
	14	0	1149	1115	225	152	661	223	70	638							0	296	2196	0	60	0	5	0	0	0
	234	6	943	813	43	187	683	242	0	590							0	330	2310	0	43	0	6	0	0	0
	251	21	909	671	91	29	672	202	92	511							0	243	2087	0	39	0	45	0	0	0
	95	44	1141	592	161	160	682	35	504	242							0	188	1749	0	90	0	7	1	0	0
	35	2	1092	616	243	193	731	86	841	231							0	145	1329	0	87	0	22	4	0	0
	31	8	957	340	318	170	624	24	1114	201							0	172	1282	0	131	0	17	2	0	0
	47	9	686	213	326	162	675	22	978	140							0	143	1442	0	117	0	34	0	0	0
	3	33	928	222	338	28	675	59	686	140							0	157	1205	0	116	0	0	0	0	0
	7	24	841	109	495	140	482	11	335	180							0	145	1138	0	128	0	0	5	0	0
	36	18	831	127	664	156	381	65	221	61							0	176	1277	0	146	0	0	0	0	0
	31	120	826	219	827	167	398	139	205	69							0	235	1190	2	134	0	7	0	6	0
	107	81	783	210	855	161	427	116	219	84							0	182	1126	2	133	0	24	3	9	0
	553	0	838	190	858	238	420	68	265	240							0	354	912	4	228	0	178	1	1	0
	1180	113	932	356	694	241	472	109	189	526							0	377	621	3	194	0	265	3	0	0
	1640	18	742	359	486	93	540	160	239	481							0	308	807	0	154	1	577	3	7	0
	1449	0	426	376	437	198	522	219	145	424							0	285	548	1	61	0	812	1	4	0
	1082	23	328	427	506	109	425	220	128	178							0	261	535	0	122	5	836	2	0	0
	324	51	386	367	505	128	458	81	62	420							0	215	796	2	318	0	876	1	0	0
	523	111	153	232	511	133	470	59	109	176							0	204	985	0	415	0	589	12	0	0
	610	31	240	315	387	110	481	131	308	123							0	98	1053	0	517	0	666	3	0	0
	235	34	436	285	677	285	428	238	276	502							0	113	1122	0	488	2	672	7	1	0
	185	0	312	374	703	131	239	278	191	777							0	155	1290	0	442	0	745	1	3	0
	197	8	304	412	570	301	144	292	196	681							0	123	1115	2	619	0	445	2	0	0
	113	15	149	270	305	265	213	318	152	1041							0	85	826	0	834	0	414	2	10	0
	347	15	49	336	284	103	216	417	32	1200							0	74	786	3	769	0	521	2	31	0
	596	21	198	363	421	130	246	414	40	869							0	52	713	0	605	0	529	6	2	0
	726	15	128	444	399	86	160	271	73	994							1	54	362	0	375	0	446	0	0	0
	711	0	148	521	454	129	64	159	331	708							0	48	425	0	385	0	380	0	0	0
	431	0	57	535	522	88	117	200	551	902							0	113	517	0	165	0	229	1	0	0
	368	2	90	818	584	154	199	217	824	529							0	125	409	0	114	0	108	0	0	0
	295	68	72	666	382	270	214	162	797	699							0	133	296	0	165	0	202	0	0	0
	115	0	161	513	274	317	187	88	833	585							0	132	265	0	244	0	318	0	0	0
	141	0	130	577	155	263	105	184	654	480							0	122	228	0	182	0	319	0	0	0
	44	6	40	476	245	176	164	284	706	695							0	102	194	0	178	0	99	0	0	0
	81	0	24	423	210	413	151	259	746	596							0	139	143	0	215	0	89	0	0	0
	55	24	19	482	328	506	201	181	751	785							0	114	255	0	329	0	33	0	0	0
	62	0	101	477	306	373	128	410	671	805							0	72	189	0	245	0	70	0	0	0
	121	38	35	427	309	162	100	462	586	638							0	71	141	0	198	0	34	0	0	0
	92	41	36	291	391	268	145	304	197	928							0	37	60	0	87	0	52	0	0	0
	39	13	67	350	262	311	179	358	275	595							0	39	171	0	188	0	37	0	0	0
	83	4	75	377	269	150	129	323	425	592							0	63	179	0	328	0	22	0	6	0
	108	17	39	380	420	172	26	256	394	795							0	109	259	5	229	0	100	0	22	0
	56	58	89	469	469	240	32	396	395	733							1	74	307	18	90	0	274	0	37	0
	50	34	244	509	487	261	79	391	446	706							0	19	408	0	154	0	395	0	13	0
	102	32	431	296	293	359	22	413	514	729							0	38	500	4	122	0	450	0	57	0
	72	76	635	320	213	454	27	295	632	663							0	52	397	0	275	5	441	0	41	0
	50	50	772	304	226	353	89	238	524	782							0	41	267	1	294	0	308	0	25	0
	20	251	895	243	263	404	29	292	460	768							0	64	398	1	308	0	561	0	23	0
	30	438	889	317	287	532	61	232	554	597							0	55	334	0	454	0	681	0	46	0
	61	533	987	280	121	491	99	409	549	396							0	67	168	1	385	0	769	0	67	0
	7	586	977	300	144	477	16	564	401	324							0	16	234	3	411	0	849	0	20	0
	91	385	1234	283	24	438	28	630	177	417							1	24	351	0	552	4	818	0	10	0
	7	246	1101	236	109	400	56	694	325	223							0	39	312	0	573	0	725	0	59	0
	10	243	891	298	194	423	21	651	258	477							0	1	203	0	306	0	354	0	86	0
	12	370	540	208	187	556	6	551	164	267							0	1	55	4	301	0	38	0	64	0
	0	273	461	311	265	609	50	463	205	324							0	28	89	1	267	0	20	0	57	0
	0	399	710	149	259	509	60	379	312	195							0	9	52	5	199	0	12	0	37	0
	0	405	692	178	292	646	43	462	336	361							0	0	34	1	384	0	227	0	53	0
	0	403	884	122	375	507	108	515	339	210							1	2	29	0	415	0	137	0	63	0
	0	283	351	19	279	472	84	584	338	219							0	0	29	0	257	0	73	0	38	0
	0	288	252	38	213	443	34	707	392	352							0	3	8	0	329	0	9	0	1	0
	0	304	112	150	154	414	62	603	355	560							0	0	21	0	351	0	0	0	1	0
	0	236	304	132	78	460	34	489	344	652							0	0	84	0	214	0	72	0	1	0
	0	299	420	73	76	234	36	391	424	626							0	0	139	0	83	0	92	0	0	0
	0	181	436	97	44	320	60	345	455	584							0	1	134	0	78	0	19	0	1	0
	0	211	350	79	104	364	81	375	524	683							0	0	103	0	25	0	85	0	0	0
	0	249	444	98	317	204	3	350	574	345							0	2	60	0	26	0	263	0	0	0
	0	389	360	87	215	135	45	257	434	450							59	4	42	0	47	0	389	0	0	0
	4	319	270	66	141	324	10	230	503	270							81	0	53	0	36	0	506	0	1	0
	251	272	230	76	42	441	20	180	311	573							16	0	45	0	22	0	645	0	0	0
	348	336	346	22	104	466	26	302	419	485							0	3	54	1	43	0	761	0	1	0
	395	187	192	70	168	393	4	322	361	547							13	28	118	0	1	0	701	0	15	0
	57	277	149	52	122	432	67	316	467	504							77	3	138	0	3	3	548	0	141	0
	47	296	237	86	195	515	38	229	659	281							119	0	144	0	0	0	1057	0	175	0
	161	344	91	97	375	490	4	240	546	416							216	21	251	0	77	5	1061	0	116	0
	77	246	162	37	271	316	2	181	379	145							147	1	128	0	2	0	1172	0	63	0
	241	421	309	112	441	306	25	241	580	209							94	7	130	0	1	17	551	0	88	0
	152	401	321	146	444	154	34	196	439	74							95	3	100	0	6	0	919	0	233	0
	69	185	78	47	372	247	93	188	399	284							71	2	77	0	83	0	1268	0	131	0
	67	270	148	106	404	260	149	236	451	371							32	0	134	0	9	5	589	0	50	0
	99	279	226	20	489	201	122	216	418	390							29	1	123	1	16	0	677	0	45	0
	47	135	96	96	398	272	185	82	212	379							38	0	92	0	17	0	263	0	21	0
	6	45	153	115	412	241	239	179	45	266							72	0	137	2	0	0	586	1	59	1
	126	45	176	62	388	259	215	167	350	384							84	2	60	0	3	0	846	22	38	45
	61	15	164	41	184	349	129	154	265	662							105	1	118	3	2	0	703	38	108	46
	57	7	291	43	490	472	106	99	301	242							108	0	83	1	2	3	371	67	106	43
	68	9	396	43	490	480	67	243	224	430							49	1	26	1	18	0	108	11	16	6
	85	29	546	5	588	447	48	75	266	261							53	0	0	0	19	0	314	16	48	1
	161	31	368	410	526	466	15	26	228	311							110	0	25	0	1	0	523	30	77	0
	59	64	458	721	434	253	51	20	413	255							17	0	0	0	6	0	508	11	18	2
	73	183	476	725	436	298	63	105	382	246							135	0	13	0	2	0	70	4	9	2
	43	275	616	449	556	179	6	89	291	447							52	0	69	0	5	0	210	3	12	3
	60	232	725	276	679	182	12	5	74	132							89	0	33	0	1	0	229	0	4	1
	94	339	683	265	502	170	15	4	316	444							60	0	0	0	2	0	70	31	2	0
	105	307	1160	330	793	153	13	95	118	528							126	0	35	0	4	0	13	42	0	0
	118	227	1126	362	748	172	67	50	160	684							146	0	10	0	1	0	28	43	0	1
	151	316	1271	306	760	60	22	58	127	701							117	0	0	0	2	0	1	0	0	0
	132	287	1524	168	919	54	43	159	142	795							36	0	0	0	1	0	13	0	0	0
	80	304	1325	309	934	109	84	97	262	782							41	0	1	0	4	0	1	0	0	0
	157	324	1755	173	869	65	139	7	301	600							13	1	0	0	12	0	0	0	0	0
	267	408	1737	139	704	183	61	77	96	649							101	7	18	0	10	0	9	0	5	0
	391	188	1293	313	710	487	115	120	279	492							163	2	44	2	7	0	15	0	45	0
	729	156	1179	278	804	524	169	15	77	529							238	0	0	0	13	5	6	78	30	9
	841	283	945	359	825	510	118	130	84	505							92	0	6	1	15	0	20	135	18	2
	977	109	841	389	655	454	64	235	223	561							95	1	73	2	16	5	12	262	7	7
	516	308	824	371	849	315	26	241	129	524							116	6	4	3	28	2	79	313	4	0
	616	444	1142	416	513	217	165	180	226	463							137	1	4	0	35	11	12	102	2	3
	634	435	882	471	332	157	93	202	269	593							139	0	1	0	32	15	4	92	0	6
	589	259	650	749	325	172	119	98	365	609							59	0	59	0	6	8	5	98	0	13
	494	415	619	529	493	235	70	174	398	695							100	1	1	0	10	0	3	104	0	15
	312	449	405	316	769	311	200	297	606	535							173	0	25	3	4	2	4	122	0	8
	420	397	541	337	714	430	12	189	556	858							135	1	4	0	1	2	6	133	0	44
	549	371	391	530	702	548	7	182	198	707							93	0	77	0	15	0	5	162	0	37
	574	391	346	792	420	498	61	275	307	354							105	0	0	0	14	9	4	156	0	22
	430	473	1089	503	466	434	33	177	195	201							102	0	3	24	0	0	1	123	0	23
	422	570	1811	652	424	415	4	276	131	294							48	0	0	4	12	4	4	108	0	3
	454	515	2387	893	632	240	7	163	128	465							11	0	6	0	4	0	4	83	0	7
	441	463	2379	1167	688	296	141	97	88	406							103	0	0	1	10	0	0	93	0	0
	277	255	1785	966	1161	319	3	121	140	438							96	0	4	0	13	0	0	38	0	0
	253	187	1086	703	1263	396	8	122	144	266							14	0	0	0	4	0	2	25	0	0
	302	148	887	267	1453	331	2	121	244	295							10	0	1	0	11	0	2	23	0	0
	337	47	918	201	1352	387	38	136	225	499							8	0	1	0	6	0	2	24	0	0
	264	30	982	365	1070	393	17	202	169	826							37	0	0	0	68	0	1	45	0	0
	125	20	956	515	772	343	89	271	104	894							6	0	2	0	33	0	0	40	0	0
	99	46	416	591	696	197	52	289	114	689							22	0	3	0	21	0	1	42	0	0
	156	45	193	569	874	351	0	301	313	575							15	0	0	0	10	0	2	16	0	0
	29	11	216	403	1312	293	5	246	337	662							3	0	0	0	1	0	0	6	0	0
	16	3	59	292	1765	259	2	176	251	523							1	0	0	0	4	0	0	2	0	0
	77	49	116	306	1474	155	6	292	166	252							32	0	0	0	0	0	0	3	0	0
	69	18	223	383	1452	165	63	365	71	272							89	0	0	0	7	0	2	3	0	0
	11	15	314	437	1554	132	6	422	360	378							42	1	1	1	8	0	3	13	4	0
	34	11	324	504	1987	147	25	454	631	372							26	7	5	5	79	14	2	25	5	3
	11	37	461	633	1994	143	3	344	288	494							98	4	9	0	19	43	0	66	0	0
	40	15	282	664	2045	42	5	357	144	656							44	13	20	2	3	38	0	16	0	0
	25	21	396	723	1305	132	18	275	245	390							6	3	4	0	23	5	2	26	1	0
	93	20	457	886	1121	9	23	328	217	470							111	0	7	1	59	7	2	2	0	0
	12	37	350	865	1343	108	59	384	131	636							160	2	25	0	101	0	0	0	0	0
	19	113	104	587	1293	64	101	372	256	717							75	2	157	1	191	1	0	0	0	0
	93	180	127	213	1200	22	13	297	103	383							79	0	94	0	97	16	1	1	0	0
	22	314	158	191	862	122	33	309	267	371							146	0	63	0	106	0	2	1	0	0
	92	448	311	236	1208	6	7	479	236	396							74	0	57	1	171	4	1	0	0	0
	125	412	309	170	850	83	34	365	140	436							44	0	63	0	107	0	0	4	0	0
	160	438	146	239	993	24	131	327	287	814							55	0	1	0	12	0	1	12	0	0
	197	329	211	435	975	66	121	443	177	795							106	0	0	0	35	1	0	0	0	0
	109	326	62	524	566	99	130	486	51	632							115	0	24	7	56	0	0	1	0	0
	113	362	62	603	764	141	132	421	435	401							71	0	73	0	42	0	0	0	0	0
	155	557	116	609	650	138	78	176	485	276							88	0	35	0	99	0	0	0	0	0
	15	341	98	622	510	74	81	375	458	293							125	0	68	0	32	0	0	0	0	0
	92	243	61	591	736	69	137	279	476	587							192	0	42	0	1	0	0	0	0	0
	116	247	332	609	394	45	315	149	302	429							187	0	129	0	1	0	0	0	0	0
	24	325	187	801	247	75	281	185	332	347							116	0	19	0	2	0	0	0	0	0
	42	228	433	615	616	127	369	81	261	494							128	0	73	0	21	0	0	0	0	0
	23	255	284	620	533	111	435	93	98	513							102	0	28	0	33	0	0	0	0	0
	46	326	131	699	450	58	552	121	114	478							46	0	130	0	10	0	0	0	0	0
	108	371	167	684	504	63	539	4	58	415							195	0	4	0	7	0	0	0	0	0
	50	404	179	398	496	110	419	43	88	464							27	0	37	0	0	0	0	0	0	0
	104	339	181	811	590	162	353	15	42	488							97	0	101	0	1	0	0	0	0	0
	74	521	253	820	308	128	175	30	52	352							168	0	4	0	3	0	0	0	0	0
	115	444	57	597	344	217	190	52	36	314							228	0	32	0	1	0	0	0	0	0
	38	475	391	402	303	324	201	181	14	286							95	0	160	0	1	0	0	0	0	0
	28	379	124	505	311	209	207	360	42	227							54	0	29	1	5	0	0	0	2	0
	41	426	247	504	401	205	344	147	30	236							66	0	103	0	49	5	5	0	1	0
	81	281	453	313	318	111	214	93	30	244							54	1	263	0	99	1	12	0	0	0
	36	438	376	439	505	99	318	83	124	289							103	0	384	1	75	7	26	6	0	0
	85	382	486	301	533	47	187	87	263	336							67	1	197	0	3	1	21	14	2	0
	100	523	170	50	240	170	79	243	45	378							33	0	124	0	0	28	12	10	0	0
	43	544	201	140	356	213	110	313	200	439							77	0	49	0	0	0	6	7	0	0
	0	521	94	77	310	316	210	187	50	309							5	0	29	0	19	1	10	4	0	0
	55	392	244	307	396	328	235	283	83	317							50	1	124	0	4	3	5	0	0	0
	24	505	203	390	534	278	112	178	96	255							65	0	313	0	3	0	3	0	0	0
	31	595	318	340	330	270	88	92	41	216							56	0	404	0	7	5	3	0	0	0
	84	360	414	63	266	246	115	35	103	219							13	0	364	0	28	0	8	0	0	0
	21	659	322	297	159	279	62	37	33	184							1	7	209	0	5	0	14	1	0	0
	38	458	90	318	136	256	50	20	187	132							33	0	212	0	3	0	16	0	0	0
	19	386	310	307	353	173	24	13	299	52							4	0	281	0	3	0	8	1	0	0
	25	378	396	205	104	209	40	17	295	103							42	0	199	0	1	5	7	0	0	0
	21	427	132	166	349	95	134	87	342	131							79	0	169	0	4	0	0	0	0	0
	17	317	250	218	367	110	209	153	155	146							41	0	19	0	2	0	0	0	0	0
	18	335	107	231	68	127	65	196	137	143							9	0	30	0	0	0	1	0	0	0
	1	398	175	535	271	88	107	205	185	102							34	0	33	0	0	0	1	0	0	0
	46	384	44	636	162	137	88	177	99	120							20	0	40	0	2	0	2	0	0	0
	33	326	193	657	328	133	261	158	70	93							18	0	3	0	3	0	2	0	0	0
	44	494	167	433	53	72	107	147	64	106							23	0	10	0	0	0	0	0	0	0
	43	490	249	242	133	9	133	173	86	217							1	0	0	0	3	0	0	0	0	0
	24	459	214	403	221	59	138	160	37	225							11	0	20	0	6	0	1	0	0	0
	16	577	32	525	358	36	118	187	146	363							48	0	0	0	0	0	0	0	0	0
	17	549	158	752	607	57	118	285	310	350							4	0	4	0	0	0	0	0	0	0
	28	510	153	520	853	106	32	465	140	176							11	0	0	0	1	0	0	0	0	0
	5	526	259	442	597	131	72	433	299	165							0	0	1	0	1	0	1	0	0	0
	33	472	261	424	594	84	166	287	137	60							0	0	10	0	0	0	0	0	0	0
	0	336	305	232	520	64	274	264	12	26							4	0	6	0	0	0	0	0	2	0
	1	351	358	372	413	87	393	285	87	43							10	0	7	4	1	0	5	0	4	1
	2	399	107	372	817	114	288	133	18	52							2	1	464	1	3	0	0	0	0	0
	1	393	392	426	1087	39	118	124	111	87							3	4	798	2	2	1	0	0	0	0
	17	523	703	317	814	90	240	196	105	44							8	2	727	2	0	4	1	0	0	0
	53	591	925	308	1000	63	186	259	355	54							12	0	630	0	1	2	0	2	0	0
	32	415	936	380	907	5	225	301	64	202							14	1	462	0	4	8	0	0	0	0
	50	512	629	474	1032	40	250	238	71	384							0	1	384	0	0	0	0	0	0	0
	73	463	582	499	1455	16	158	224	251	266							2	0	307	0	2	0	0	1	0	0
	105	408	653	437	1477	11	168	223	209	334							2	0	383	0	3	3	0	137	0	0
	39	249	386	199	1294	37	173	240	395	350							0	0	409	0	2	0	0	276	0	0
	54	19	446	212	1323	129	146	188	220	319							0	0	372	0	4	0	0	491	0	0
	101	151	409	303	1158	129	59	218	198	259							0	0	331	0	2	1	0	690	0	0
	153	68	388	220	1248	199	27	199	238	275							0	0	187	0	2	0	0	617	0	0
	137	260	187	264	1492	232	254	193	93	144							0	0	235	0	4	0	0	837	0	0
	28	97	12	290	1377	297	31	257	233	155							0	0	215	0	1	2	0	818	0	0
	7	77	90	273	1362	338	63	105	180	211							9	0	150	0	9	0	0	779	0	0
	18	136	189	165	1343	266	97	246	169	172							0	0	344	0	78	0	0	805	0	0
	29	137	269	133	823	207	38	73	92	89							0	0	309	0	114	0	0	476	0	0
	74	97	528	164	195	344	54	150	136	51							0	0	207	0	34	0	0	391	0	0
	130	82	403	263	333	276	138	71	120	1							0	0	207	0	1	0	0	396	0	0
	62	154	171	251	510	312	9	139	43	28							0	0	304	0	32	0	0	249	0	0
	71	236	384	295	740	283	156	63	98	91							0	0	184	0	65	0	0	343	0	0
	43	307	897	454	950	270	29	70	81	125							0	0	46	0	20	0	0	399	0	0
	68	263	1059	479	1193	262	76	23	64	159							0	0	75	0	87	0	0	332	0	0
	24	363	940	384	1290	356	121	74	29	293							0	0	57	0	26	0	0	281	0	0
	4	449	824	392	959	268	101	12	127	236							0	0	210	0	97	0	0	235	0	0
	2	459	583	465	1033	287	93	166	136	291							0	0	142	0	90	0	0	266	0	0
	0	261	504	381	872	184	55	281	61	301							0	0	167	0	60	0	0	261	0	0
	8	252	601	280	988	196	33	335	114	317							0	0	193	0	37	0	0	241	0	0
	47	296	413	228	911	116	62	282	194	317							0	0	147	0	62	0	0	207	0	0
	29	273	283	231	890	103	14	206	166	288							0	0	148	0	0	0	0	212	0	0
	7	255	233	470	1042	45	25	157	67	438							49	0	150	1	0	0	0	193	0	4
	35	273	379	621	546	85	32	221	83	357							237	0	164	0	3	0	0	129	0	0
	10	131	522	551	798	72	25	95	101	275							337	0	169	0	0	0	0	147	0	0
	32	138	721	472	917	22	0	201	74	196							253	0	254	0	9	0	0	63	0	0
	9	106	746	217	522	11	56	341	104	175							136	0	383	0	0	0	0	131	0	0
	16	115	677	170	626	32	84	366	40	183							92	0	392	0	0	0	0	197	0	0
	12	166	373	160	707	39	194	344	53	230							18	0	435	0	0	0	0	85	0	0
	64	272	299	99	945	59	26	237	63	278							8	0	342	0	0	0	0	93	0	0
	17	192	410	42	741	231	166	200	114	133							20	0	333	0	29	0	0	63	0	0
	27	368	478	117	489	415	175	120	134	112							56	0	264	0	20	0	0	61	0	0
	24	244	371	65	609	550	56	273	423	214							50	0	124	0	1	0	0	47	0	0
	20	317	393	132	765	518	116	221	475	236							0	0	158	1	26	0	0	23	0	0
	67	417	638	175	1156	370	131	33	355	165							5	0	51	0	0	0	0	45	0	0
	68	427	661	120	1193	189	186	85	422	154							56	0	172	1	0	0	0	3	0	1
	107	314	710	149	891	121	203	120	832	176							153	0	182	2	2	0	0	11	0	0
	36	203	659	165	698	117	255	103	959	171							128	0	80	0	0	0	0	1	0	0
	23	230	782	168	708	165	380	264	707	97							207	0	208	0	0	0	0	2	0	0
	88	169	825	257	581	121	545	178	830	104							150	25	55	0	0	2	0	3	0	0
	12	82	650	268	522	63	448	51	822	47							76	3	89	0	0	0	0	5	0	0
	48	141	967	399	614	70	464	25	623	33							65	0	8	0	0	0	0	4	0	0
	70	264	1019	459	438	105	544	69	960	18							123	0	27	0	0	0	0	1	0	0
	55	201	897	387	678	126	438	240	822	69							161	2	72	0	0	0	0	0	0	0
	101	245	649	560	474	136	586	81	807	247							121	0	125	0	0	0	0	0	0	0
	13	206	566	284	343	143	694	73	747	503							129	0	27	0	0	0	0	0	0	0
	29	277	446	68	376	134	699	92	717	588							179	0	101	0	0	0	0	0	0	0
	47	239	228	168	575	149	611	51	830	580							112	0	215	0	0	0	0	0	0	0
	13	197	255	129	466	136	559	61	719	549							135	1	184	0	0	4	0	0	0	0
	3	118	390	143	419	91	609	88	676	492							303	4	162	0	0	0	0	0	0	0
	1	23	151	117	762	18	667	49	511	349							166	55	86	0	0	0	0	0	0	0
	25	32	98	76	837	19	571	42	722	261							116	136	45	0	0	0	3	0	0	0
	0	114	185	57	849	15	399	175	707	177							206	43	38	0	0	0	0	0	0	1
	34	236	180	23	968	69	265	441	629	252							176	23	20	0	0	0	0	0	0	0
	17	345	282	14	820	89	226	540	716	127							123	36	32	0	0	0	1	0	0	0
	47	273	135	7	785	36	175	438	681	121							83	28	69	0	0	0	1	0	0	0
	0	101	126	26	1246	9	214	337	597	91							64	32	1	0	0	0	7	0	0	0
	65	11	202	33	1354	0	219	496	359	86							113	73	4	0	0	0	1	0	0	0
	5	21	201	8	924	5	57	254	416	174							170	151	48	0	0	0	2	0	0	0
	7	46	188	7	1181	2	137	186	611	251							113	145	11	0	0	0	2	0	0	0
	20	57	381	9	1005	18	444	77	470	205							189	95	0	0	0	0	3	0	0	0
	46	193	625	2	787	146	731	98	336	136							105	69	1	0	0	0	1	0	0	0
	54	133	567	6	556	358	762	59	246	159							73	82	0	0	1	0	8	0	0	0
	31	51	198	19	768	330	533	232	321	175							113	119	4	0	31	0	5	0	0	0
	81	64	379	86	558	266	427	237	437	206							118	77	183	15	17	0	5	0	0	0
	129	40	566	454	310	395	603	291	109	201							115	64	419	30	104	0	2	0	0	0
	80	4	460	412	234	398	529	334	148	135							197	41	237	67	315	0	0	0	0	0
	45	14	211	240	110	317	450	187	125	149							234	16	315	74	204	1	0	0	0	0
	17	5	393	166	196	227	147	56	192	71							112	15	300	53	101	0	6	0	0	0
	0	2	374	111	299	177	173	125	202	3							166	13	269	52	29	1	6	0	0	0
	0	1	454	90	257	81	198	82	187	10							180	26	191	36	6	0	1	0	0	0
	0	0	388	91	750	131	210	65	339	0							118	2	65	22	8	0	4	0	0	0
	5	10	530	63	604	161	67	8	426	4							102	23	101	6	42	0	2	1	0	0
	122	0	595	9	576	192	67	34	303	5							123	23	48	20	0	2	7	4	0	0
	89	201	577	74	615	198	34	27	441	3							174	7	49	10	15	0	0	0	0	0
	36	72	424	10	599	271	56	0	399	56							128	5	31	4	597	0	4	0	0	0
	106	171	225	72	783	273	168	1	433	7							109	12	57	18	842	0	0	0	0	0
	16	212	398	12	273	363	692	5	393	18							14	22	52	62	458	0	0	0	0	0
	4	267	330	30	337	256	1115	5	607	21							99	11	79	13	682	0	1	0	0	0
	20	226	1046	33	514	254	1258	4	725	13							60	32	44	33	642	0	2	0	0	0
	20	97	1719	13	240	249	987	1	505	200							36	32	20	0	288	0	13	2	0	0
	95	128	1864	68	380	240	938	17	435	152							42	16	22	37	94	0	14	0	0	0
	80	33	1906	98	256	361	1079	0	528	103							139	0	60	2	310	0	9	1	0	0
	155	142	1261	224	368	261	800	18	321	149							80	0	77	25	778	0	1	0	0	0
	208	145	712	304	340	181	482	25	303	190							59	1	110	10	502	0	5	0	0	0
	123	222	673	150	260	84	369	48	720	111							18	1	83	13	77	0	0	0	0	0
	193	173	881	146	201	46	292	13	868	71							16	0	45	21	168	0	6	0	0	0
	329	186	708	229	156	85	225	11	503	81							49	0	60	49	313	0	0	0	0	0
	398	77	386	134	271	96	162	21	440	148							79	0	66	50	379	0	0	0	0	0
	495	97	464	153	228	141	88	26	564	202							71	0	65	27	154	0	0	0	0	0
	521	127	407	171	251	140	223	47	383	209							44	0	53	9	256	0	0	0	0	0
	403	183	354	122	273	92	428	8	412	146							70	0	34	17	427	0	0	0	0	0
	273	230	416	153	468	87	611	37	397	124							37	0	53	22	121	0	0	0	0	0
	360	429	236	54	1077	210	515	11	180	158							9	3	53	13	21	0	0	0	0	0
	378	430	558	54	734	126	345	29	217	165							50	0	3	7	39	0	3	0	0	0
	240	406	681	17	1256	82	205	7	218	157							153	1	0	1	177	0	0	0	0	0
	242	315	705	73	1435	101	261	9	521	141							114	0	6	0	143	0	0	0	0	0
	331	213	475	57	1410	75	273	3	852	68							149	0	0	3	52	11	1	0	0	0
	179	116	440	46	1285	82	290	13	885	102							39	0	2	12	89	0	1	0	0	0
	146	132	750	73	1320	76	385	1	599	179							12	0	12	1	209	4	2	0	0	0
	267	104	656	159	1455	90	251	5	337	209							33	0	55	1	188	0	0	0	0	0
	362	139	553	209	1135	103	425	32	389	234							3	0	34	0	98	0	0	0	0	0
	172	197	549	122	771	125	535	9	525	199							5	0	20	0	226	0	0	0	0	0
	131	188	347	100	1220	129	437	26	384	202							10	0	5	0	396	0	0	0	0	0
	138	252	304	146	973	128	299	9	123	210							1	0	5	0	246	0	0	0	0	0
	106	381	296	64	543	79	385	14	64	172							15	0	4	0	77	0	0	0	0	0
	110	481	372	196	400	85	345	19	284	188							52	0	18	0	103	0	0	0	0	0
	118	430	434	229	343	65	426	34	287	44							37	0	36	0	286	0	0	0	0	0
	128	368	539	351	374	106	313	10	417	83							97	0	9	0	152	0	0	0	0	0
	151	378	634	437	123	42	196	24	493	154							135	0	5	0	81	2	0	0	0	0
	95	381	535	420	90	20	116	33	687	153							91	0	9	0	255	0	0	0	0	0
	248	311	180	434	48	55	148	12	500	208							58	0	50	3	216	0	0	0	0	0
	170	233	233	460	51	16	170	127	402	269							77	0	124	0	57	0	0	0	0	0
	121	303	300	299	174	52	139	262	489	211							112	0	201	0	124	0	0	0	0	0
	115	280	150	373	174	75	79	195	729	278							74	0	212	0	74	0	0	0	0	0
	92	310	230	364	432	92	63	122	715	287							34	0	137	0	20	0	0	0	0	0
	110	299	311	289	481	47	130	64	671	304							148	0	105	0	91	0	0	0	0	0
	63	164	427	319	256	110	127	55	702	377							114	1	50	0	42	0	0	0	0	0
	63	209	552	227	296	25	136	328	842	315							62	0	39	0	52	0	0	0	0	0
	107	82	630	238	302	104	303	457	727	256							30	0	20	0	71	0	0	0	0	0
	95	193	557	128	49	104	388	426	986	314							36	0	42	0	6	0	0	0	0	0
	138	145	341	136	237	24	401	352	1081	277							55	0	88	0	66	0	0	0	0	0
	70	125	245	44	102	73	453	305	1138	280							31	0	147	0	138	0	0	0	0	0
	80	62	286	137	249	80	509	314	1064	310							41	2	233	0	136	0	0	0	0	0
	84	94	365	146	56	47	554	328	849	217							36	1	352	3	376	0	0	0	0	0
	121	140	408	127	30	73	585	296	732	177							24	1	567	3	262	0	1	0	0	0
	82	158	484	140	35	71	384	214	256	174							17	6	342	3	219	0	0	0	0	0
	186	123	546	146	0	99	336	186	407	166							23	91	183	0	185	1	0	0	0	0
	271	116	797	105	55	87	88	140	269	268							15	86	143	0	66	0	0	7	0	0
	344	202	889	13	140	125	128	122	119	277							24	28	39	0	11	4	1	4	0	0
	367	178	1091	64	276	110	311	127	250	170							23	2	48	0	0	0	0	2	0	0
	191	177	1051	23	332	94	337	96	50	299							48	1	64	0	6	0	0	10	0	0
	245	253	794	58	350	53	325	88	272	144							29	19	97	0	21	0	0	21	0	0
	210	230	640	96	523	43	375	121	412	243							102	19	274	0	25	2	0	18	0	0
	208	100	569	257	388	48	406	144	417	137							142	22	443	0	29	0	0	14	0	0
	192	116	593	227	151	95	326	111	204	237							57	10	474	0	15	0	0	25	0	0
	191	126	542	234	695	79	325	87	90	213							20	6	316	0	7	0	0	11	0	0
	259	215	717	124	823	81	190	102	76	167							31	2	247	0	4	0	0	15	0	0
	232	297	794	174	829	23	304	203	103	78							54	0	244	0	4	0	0	20	0	0
	322	253	660	190	811	57	280	215	159	40							26	0	389	221	7	0	0	11	0	0
	273	173	582	254	780	84	300	249	103	58							49	0	175	69	8	0	0	8	0	0
	127	136	508	366	673	32	323	211	142	47							53	2	227	77	5	0	0	21	0	0
	221	114	464	379	416	12	257	195	227	60							8	0	204	65	13	0	0	20	0	0
	206	136	275	365	512	56	355	221	266	105							8	1	223	18	7	0	0	13	0	0
	248	64	409	243	676	118	331	173	183	77							11	0	287	15	0	0	0	3	0	0
	248	41	517	258	617	192	441	233	47	4							5	1	293	17	5	0	0	1	0	0
	246	70	815	242	557	194	424	189	57	21							24	0	368	1	2	8	0	0	0	0
	249	53	960	250	171	193	345	242	50	41							80	2	635	11	10	1	0	0	0	0
	237	116	754	298	245	102	389	313	155	70							42	0	716	16	1	0	0	0	0	0
	185	112	806	220	118	194	241	308	74	82							38	5	492	12	0	0	0	4	0	0
	192	147	838	160	207	130	291	289	22	174							2	2	379	20	0	0	0	28	0	0
	227	180	765	249	354	164	218	294	18	190							0	0	297	37	2	0	0	21	0	0
	187	168	765	289	283	253	325	261	81	119							1	0	219	6	1	0	0	10	0	0
	222	133	673	286	438	272	301	280	122	292							28	0	147	28	45	0	0	11	0	0
	262	76	705	247	326	180	299	306	115	346							17	5	172	5	17	0	0	1	0	0
	360	112	685	100	217	150	355	259	43	353							25	8	129	1	9	0	0	0	0	0
	305	59	619	171	143	122	287	123	161	192							11	9	162	3	4	0	0	3	0	0
	339	109	665	295	357	209	260	163	227	191							1	0	150	3	11	4	0	13	0	0
	427	144	717	362	390	175	214	208	64	214							1	0	233	0	8	6	0	15	0	0
	407	90	854	343	461	240	150	304	123	179							2	0	178	0	6	0	1	19	0	0
	157	124	935	285	17	204	279	406	53	238							1	0	308	0	4	0	1	14	0	0
	150	155	723	356	78	86	158	468	88	139							0	2	341	0	8	0	1	9	0	0
	112	160	732	347	325	19	41	564	14	142							5	3	272	0	0	0	0	7	0	0
	152	196	605	263	378	7	102	490	11	72							1	0	261	0	7	2	0	3	0	0
	55	270	595	194	415	12	69	509	315	357							0	0	273	1	4	0	0	0	0	0
	134	208	677	122	272	18	230	616	1072	226							0	0	224	0	4	0	0	0	0	0
	116	158	788	89	211	4	293	445	1772	293							0	0	140	0	6	0	1	0	0	0
	130	99	626	150	473	12	176	479	1865	366							0	0	37	0	5	0	0	0	0	0
	205	309	533	175	459	30	136	442	1591	207							1	0	24	0	2	0	0	0	0	0
	203	140	171	180	97	65	69	355	1242	97							0	0	54	0	2	0	1	0	0	0
	199	57	102	81	278	62	143	165	1305	140							1	3	42	0	8	0	0	0	0	0
	260	168	134	20	346	23	163	192	1164	138							2	6	35	0	6	0	0	0	0	0
	290	66	152	63	413	90	194	285	715	94							0	0	20	0	6	0	0	0	0	1
	369	264	230	80	335	59	142	305	512	92							0	0	18	0	0	0	1	0	0	0
	527	319	139	50	424	2	61	260	371	189							0	0	38	0	1	0	0	0	0	0
	659	358	48	4	600	6	73	267	440	288							0	0	13	0	0	0	0	0	0	0
	676	314	102	2	127	18	52	407	540	260							0	0	2	0	1	0	0	0	0	0
	592	257	129	0	744	44	22	346	609	320							0	0	33	0	0	0	0	0	0	0
	530	187	99	8	730	49	10	298	518	281							0	0	107	0	10	0	0	0	0	0
	399	199	144	2	497	34	80	223	362	329							5	0	158	0	10	0	0	0	0	0
	434	152	91	0	537	23	129	146	244	325							0	0	184	0	0	0	0	0	0	0
	431	204	132	0	406	44	143	31	45	251							1	0	150	0	0	0	0	0	0	0
	379	297	144	2	549	154	191	42	44	305							0	0	89	0	2	0	0	0	0	0
	379	250	100	0	695	107	170	26	170	328							0	12	84	0	30	0	0	0	0	0
	371	324	118	3	585	126	219	55	215	335							0	9	40	3	65	0	0	0	0	0
	287	263	129	0	474	99	241	296	168	249							18	0	98	0	82	1	0	7	0	0
	199	413	72	10	203	79	385	221	96	85							2	0	127	0	67	0	0	0	0	0
	211	497	188	1	430	76	338	57	91	109							4	0	117	0	31	6	0	0	0	0
	117	475	210	3	487	30	289	194	242	160							4	0	81	0	8	0	0	0	0	0
	72	462	107	4	395	7	356	126	214	127							26	0	147	0	1	5	0	2	0	0
	107	504	135	5	386	4	428	224	113	141							1	0	105	0	8	0	0	0	0	0
	77	574	140	23	439	6	433	311	62	158							8	0	0	0	26	0	0	0	0	0
	31	742	160	45	425	16	394	245	22	196							178	1	5	0	19	0	0	0	0	0
	17	591	199	21	184	24	406	239	155	90							146	0	2	0	4	0	0	0	0	0
	59	681	191	2	72	12	355	263	114	50							42	0	0	0	16	0	0	0	0	0
	296	533	183	3	194	23	362	357	141	147							9	0	2	0	6	0	0	0	0	0
	339	592	127	16	241	12	404	304	102	128							35	0	1	0	5	0	0	0	0	0
	468	454	263	13	221	38	498	251	38	146							54	0	0	0	3	0	0	0	0	0
	552	599	305	5	335	21	545	214	31	200							8	0	0	0	4	0	0	0	0	0
	520	691	157	4	359	116	609	244	262	55							2	0	0	0	4	0	0	0	0	0
	531	984	81	0	235	23	637	211	493	123							32	0	0	0	11	0	0	0	0	0
	443	903	40	0	247	26	729	230	355	46							82	0	0	0	0	0	0	0	0	0
	602	597	22	1	180	33	714	87	217	108							1	0	0	0	7	0	6	0	0	0
	481	590	19	50	273	21	755	121	174	95							35	1	4	0	7	1	6	0	0	0
	257	532	41	127	356	25	656	146	128	8							5	0	0	0	10	0	1	0	0	0
	322	506	57	165	329	184	632	60	64	131							2	0	0	0	8	0	0	0	0	0
	345	480	143	73	107	114	851	97	84	108							0	0	0	0	5	0	1	0	0	0
	342	329	291	15	82	73	867	102	181	85							0	0	0	0	0	0	1	0	0	0
	193	227	250	3	61	188	668	60	155	40							1	0	0	0	0	0	0	0	0	0
	158	240	249	24	46	110	688	25	266	62							75	0	0	0	1	0	1	0	0	0
	94	149	347	3	50	158	623	19	415	89							138	0	0	0	0	0	0	0	0	0
	180	163	349	4	106	128	594	65	560	85							82	0	0	0	0	0	0	0	0	0
	164	230	431	3	392	63	640	78	583	54							22	0	0	0	1	0	0	0	0	0
	296	252	295	76	312	5	629	89	557	49							21	7	0	0	17	0	0	0	0	0
	240	226	305	117	200	15	630	11	547	8							35	0	0	2	11	0	0	0	0	0
	12	213	386	91	91	11	527	47	459	39							36	2	11	0	2	8	9	0	2	0
	60	129	412	60	64	37	331	68	463	42							204	0	8	0	0	0	6	0	1	0
	102	55	485	40	71	19	311	2	259	90							477	0	1	0	1	24	13	0	0	0
	166	48	454	76	93	59	458	35	204	44							348	0	0	0	2	0	8	0	0	0
	142	186	496	70	152	157	200	8	320	33							140	2	3	0	0	12	5	0	0	0
	154	120	327	55	81	217	329	3	160	37							52	0	4	0	0	0	2	0	0	0
	66	150	61	66	75	214	132	25	564	18							160	0	15	0	0	0	9	0	0	0
	112	190	145	59	108	186	196	16	749	7							298	0	1	0	0	1	14	0	0	0
	65	288	100	40	73	177	254	17	689	30							283	0	1	0	0	0	5	0	0	0
	36	299	93	4	100	188	235	5	630	65							113	0	0	0	0	0	8	0	0	0
	148	260	182	32	177	173	252	14	334	19							201	0	0	0	0	0	16	0	0	0
	155	233	122	15	265	81	247	2	237	39							140	0	7	0	0	0	7	0	0	0
	222	86	176	10	273	94	364	23	209	19							130	0	0	0	1	0	6	0	0	0
	236	98	201	23	390	47	351	18	235	0							64	0	2	0	0	0	8	0	0	0
	98	124	149	32	416	11	307	47	280	36							188	2	0	0	0	0	21	0	0	0
	162	133	14	38	204	50	196	1	269	1							221	0	0	0	0	0	9	0	0	0
	310	47	124	43	273	2	272	17	255	29							297	5	0	1	0	0	16	0	0	0
	264	69	105	45	267	86	429	19	170	4							517	17	0	0	0	0	16	0	0	0
	66	46	55	42	44	151	561	36	93	56							580	2	3	1	2	0	11	0	0	0
	50	115	38	77	12	127	580	44	92	170							501	1	0	0	0	0	1	0	0	0
	55	160	31	128	35	148	666	11	253	176							407	0	0	0	0	0	2	0	0	0
	131	140	18	136	59	167	502	27	253	158							294	5	0	0	0	0	3	0	0	0
	242	181	0	90	94	193	398	40	313	90							316	0	0	0	0	0	1	0	0	0
	103	118	43	24	40	274	456	116	410	86							333	0	10	0	0	0	1	0	0	0
	273	87	59	21	123	282	590	74	355	40							220	23	0	0	0	0	0	0	0	0
	377	55	83	19	282	343	666	93	475	17							351	29	0	0	0	0	0	0	0	0
	252	62	128	6	481	296	391	95	673	86							405	26	1	0	0	0	2	0	0	0
	216	296	315	6	183	263	401	160	536	177							501	19	0	0	0	0	0	0	0	0
	238	96	348	7	93	309	366	176	628	45							433	26	8	0	5	0	3	0	0	0
	209	123	329	15	131	362	461	197	589	73							540	39	0	3	2	0	7	0	0	0
	272	198	334	27	179	435	398	144	453	78							565	19	0	0	13	0	17	0	0	0
	337	68	261	13	226	338	336	276	571	97							728	5	0	0	1	0	8	0	0	0
	256	49	432	9	326	446	597	232	705	151							749	5	10	0	2	0	13	0	0	0
	236	22	417	5	569	507	733	155	568	9							681	22	89	0	1	1	3	0	0	0
	143	96	480	1	583	419	485	187	486	89							655	13	181	0	0	0	7	0	0	0
	129	21	527	1	427	366	570	220	657	39							499	15	175	0	0	1	0	0	0	0
	121	42	401	0	285	179	571	240	641	41							443	52	176	0	9	0	0	0	0	0
	109	44	533	0	372	170	571	263	525	146							409	58	269	0	0	1	0	0	0	0
	215	65	331	9	401	155	582	178	309	40							366	47	303	0	0	0	0	0	0	0
	483	51	309	0	355	104	740	213	256	36							503	42	276	0	0	0	3	0	0	0
	419	47	210	1	336	8	717	244	324	8							495	37	180	0	0	0	0	3	0	0
	233	112	502	1	186	32	570	280	537	76							274	17	78	0	1	0	0	79	0	0
	222	415	628	4	329	65	534	272	631	117							250	34	58	0	0	0	0	116	0	0
	111	464	463	20	236	83	322	344	928	77							254	65	145	0	0	0	0	162	0	0
	128	443	481	5	282	139	466	388	971	84							255	21	151	0	0	0	0	105	0	0
	216	452	649	0	167	205	500	354	932	95							207	77	199	0	0	0	0	150	0	0
	205	553	573	0	241	430	448	263	948	60							416	67	134	0	0	0	0	191	0	0
	397	544	465	0	83	582	492	337	966	39							442	18	34	0	0	0	0	90	0	0
	398	455	440	0	51	435	262	316	1105	29							389	32	1	0	0	0	0	88	0	0
	397	476	218	0	32	406	364	216	824	137							200	107	17	0	0	0	0	41	0	0
	408	395	162	23	37	502	297	142	897	70							68	89	4	0	0	0	0	8	0	0
	363	283	180	126	145	447	314	139	741	99							222	55	26	0	0	0	0	13	0	0
	417	231	285	124	241	438	184	91	614	106							300	8	13	0	0	0	0	22	0	0
	544	245	186	104	362	363	147	99	559	123							413	12	21	0	50	0	0	6	0	0
	613	329	135	86	262	426	296	56	618	94							657	2	15	0	71	0	0	54	0	0
	625	209	138	8	151	318	210	80	597	60							633	32	29	0	37	0	0	73	0	0
	669	296	66	24	216	438	364	142	495	49							346	54	39	0	6	0	0	5	0	0
	842	226	128	42	205	424	351	169	744	131							237	3	78	0	10	0	0	133	0	0
	768	200	191	22	102	414	463	114	690	328							202	29	155	0	5	0	0	16	0	0
	622	206	308	6	123	453	553	69	836	199							371	14	98	0	1	0	0	4	0	0
	504	206	302	79	265	437	483	77	726	45							402	30	108	0	25	0	1	19	0	0
	404	203	214	96	179	389	570	69	484	110							866	34	63	0	12	0	1	26	0	0
	256	207	599	33	25	437	426	23	601	28							930	0	39	0	1	0	1	133	0	0
	142	214	1014	39	30	413	414	70	381	19							420	10	24	0	2	0	0	177	0	0
	151	290	1337	13	29	356	521	67	435	358							125	2	48	0	5	0	0	121	0	0
	133	200	1348	5	11	301	495	87	554	125							159	3	47	0	1	0	0	3	0	0
	213	168	1139	44	3	171	468	40	562	141							335	28	3	0	4	0	0	32	0	0
	216	135	1024	108	0	120	282	15	658	125							443	5	12	0	0	0	0	32	0	0
	299	111	832	67	4	61	218	62	723	241							353	3	5	0	0	0	0	87	0	0
	566	113	758	115	1	126	243	295	831	338							164	3	3	0	0	0	0	129	0	0
	757	105	775	33	1	126	205	360	784	102							234	0	56	0	0	0	0	89	0	0
	774	90	641	19	0	176	85	378	625	328							397	1	0	0	0	0	0	12	0	0
	753	67	698	49	1	36	115	310	582	67							395	88	3	0	0	0	0	16	0	0
	672	90	563	78	4	118	428	278	598	172							139	160	28	0	3	0	0	23	0	0
	531	126	542	59	0	107	482	270	664	130							292	319	9	0	9	0	0	23	0	0
	569	146	259	14	0	79	418	222	707	201							67	318	73	0	20	0	0	72	0	0
	648	136	191	49	110	111	567	205	691	172							96	241	173	6	3	0	0	0	0	0
	610	174	148	71	203	27	514	194	577	38							225	103	241	0	3	0	0	4	0	0
	569	274	363	33	216	143	430	223	518	23							147	251	143	0	0	0	0	0	0	0
	644	207	538	35	172	32	315	251	442	146							175	335	46	0	2	0	0	0	0	0
	675	186	604	41	88	15	503	173	365	301							202	320	41	0	4	0	0	14	0	0
	513	203	545	37	103	52	689	110	360	234							250	307	15	0	5	0	0	85	0	0
	481	202	407	95	28	7	579	112	319	258							161	261	14	0	2	0	0	84	0	0
	430	154	569	137	73	9	548	200	251	189							237	255	11	0	4	0	0	216	0	0
	268	167	638	214	98	3	605	149	203	154							210	274	216	0	2	0	0	117	0	0
	201	94	523	257	31	37	837	27	209	185							137	237	254	0	9	0	0	191	0	0
	145	126	563	315	88	67	891	13	184	115							59	285	142	0	6	0	0	124	0	0
	205	134	510	316	25	94	820	3	33	78							329	201	26	0	3	0	0	25	0	0
	274	122	675	261	13	52	761	0	174	125							328	119	40	0	27	0	0	36	0	0
	279	52	647	220	51	137	730	17	204	85							108	233	204	1	23	0	1	76	0	0
	216	74	621	205	33	87	635	0	125	51							448	290	523	2	2	0	0	99	0	0
	211	100	664	276	14	38	446	0	126	134							389	265	418	0	11	0	1	105	0	0
	127	94	707	424	0	15	734	0	96	70							438	318	296	1	5	0	0	121	0	0
	87	137	731	327	0	128	604	0	188	79							428	299	289	0	0	0	0	213	0	0
	30	130	685	399	0	24	369	27	19	275							414	258	409	0	0	2	0	264	0	0
	19	107	803	382	0	29	737	173	131	417							252	264	290	0	0	0	0	196	0	0
	26	31	806	291	0	24	667	407	166	441							135	310	108	0	0	0	0	329	0	0
	85	73	639	340	252	38	455	439	65	552							84	307	8	0	1	0	0	220	0	0
	110	120	562	377	351	84	630	333	124	546							42	365	15	0	0	0	0	336	0	0
	100	114	527	432	301	184	722	184	162	729							69	390	35	1	0	0	0	271	0	0
	138	230	466	434	162	174	788	172	261	585							54	358	50	0	0	0	0	253	0	0
	209	279	545	473	128	343	712	99	501	418							80	246	2	0	0	0	0	278	0	0
	248	164	667	516	67	289	509	121	526	410							195	329	14	0	1	0	0	307	0	0
	308	162	587	365	98	250	246	123	391	470							216	304	29	119	1	0	3	225	0	0
	636	118	617	246	187	420	245	722	353	510							531	229	2127	1090	0	0	1363	165	0	0
	744	84	1189	539	804	646	1616	773	287	541							2547	184	3241	1355	0	6	1999	1666	0	1
	643	293	2096	741	671	759	2152	741	302	685							1974	2095	4087	1017	0	644	1807	2308	0	603
	405	526	1478	370	1504	1301	2244	915	491	1131							2990	2563	3635	1098	68	1369	1297	1907	4	636
	332	881	834	868	1518	1322	1239	1185	942	1117							2677	3246	2904	1507	917	1273	1977	1957	1325	705
	223	980	768	771	1813	1093	1840	2120	1083	876							2130	2288	1539	2230	1026	1063	2078	1963	1994	848
	399	1736	1092	808	1785	1038	1693	2955	774	815							1928	2256	2098	2769	1210	952	1337	1798	2295	797
	522	1696	1279	859	1470	1267	1202	3051	726	1086							1562	3590	2349	2397	1327	1685	965	830	1962	597
	426	1590	1498	1126	2674	1560	1435	2360	1038	1180							2378	3994	2431	882	1869	1446	912	628	2707	1169
	522	1057	1499	732	2804	1728	1298	1602	1327	1157							2732	3622	2639	1234	1157	1659	427	205	3676	1570
	678	957	2243	752	3012	2136	848	995	1415	1120							2365	954	1662	586	496	1720	438	369	3081	1117
	740	612	2967	1249	2868	2655	706	644	1223	1577							1990	742	1071	708	671	1667	305	200	2705	1002
	903	472	3186	1646	1878	2432	1020	441	1055	2051							1154	934	928	742	541	1695	729	324	371	720
	1089	1679	3805	2000	856	2313	2766	627	1811	1851							586	1265	1941	1100	572	1120	668	400	744	415
	1265	1615	3487	2294	1119	1979	3142	541	2053	1147							1006	1284	1595	1150	735	981	1478	631	1150	226
	1412	1053	2535	2417	578	1585	3277	569	3411	729							632	1476	2212	958	757	1055	1693	662	1767	108
	1671	722	2505	1919	1481	1131	2936	1008	3670	520							613	1500	2855	548	913	823	1602	871	2948	251
	2054	799	2580	1258	2227	749	2034	1258	3997	505							808	1331	2734	358	974	1043	1618	1067	2359	317
	1930	387	1887	679	2312	576	928	1523	3260	318							1004	1080	2644	448	1555	970	2053	1387	3138	459
	1525	728	1726	672	1732	768	604	1570	1739	218							596	645	2073	373	1872	1136	2095	1294	2579	478
	1501	432	1477	617	1493	461	635	1714	865	211							883	543	2329	335	2425	1074	1747	1128	2374	446
	2318	475	1458	648	1064	589	557	1377	1315	362							1418	560	2044	205	2298	649	1942	1334	2209	403
	2172	337	1577	356	661	844	758	899	2131	422							828	922	2197	75	2057	382	1691	1098	1758	346
	2170	257	1441	590	979	1004	857	1133	1638	1218							965	1132	1884	124	1613	461	1675	1306	1807	462
	1178	288	1705	431	1943	1180	784	2185	1766	1184							845	1367	1675	77	1227	692	1824	1125	1314	378
	718	268	1397	497	2800	1122	912	2768	1616	884							384	1944	1889	38	995	1157	1381	843	1551	489
	792	324	1241	860	3170	936	1270	2147	1302	794							391	1494	1977	192	1064	1705	1009	944	1156	434
	766	839	946	1347	1955	1975	1709	2009	877	582							553	2087	1873	395	1007	1583	816	1217	808	491
	1118	1655	725	886	1365	2780	2008	994	1094	449							391	1676	1330	471	607	2067	806	1059	600	645
	1202	2150	326	674	1299	3138	2416	530	1593	310							577	1759	1492	322	530	2336	967	829	475	398
	1073	2587	771	596	1041	2500	2636	697	1335	255							977	1614	1933	256	232	2243	1073	913	611	489
	1821	2746	1027	480	859	1051	2699	413	1185	328							664	1173	2092	184	356	2247	1106	591	736	408
	2762	1947	1437	389	694	534	3226	924	1177	295							624	988	1539	121	358	1815	1138	307	641	202
	2369	1205	1470	515	702	513	3036	877	888	414							691	890	768	188	387	1455	1193	279	582	174
	2022	859	1325	629	598	560	2479	849	598	414							709	739	534	150	553	1116	1166	253	448	270
	1401	699	1186	440	497	155	2077	687	613	501							730	663	583	198	348	1134	1044	182	473	277
	1044	368	1157	452	420	152	1612	351	647	479							611	684	871	275	407	975	583	194	519	153
	950	537	979	432	548	153	1353	304	640	405							614	704	981	177	215	425	419	192	441	354
	877	756	608	390	512	278	1375	253	776	305							415	466	1014	166	150	371	463	110	529	514
	841	751	245	441	345	38	1193	248	764	257							332	366	945	40	89	340	552	132	443	396
	991	900	309	422	195	71	1381	98	481	158							405	391	731	48	21	264	628	72	370	276
	913	740	135	450	337	194	1560	368	332	130							416	371	645	72	44	222	747	66	327	167
	1336	637	51	490	299	218	743	289	302	105							256	409	488	29	49	255	751	38	248	191
	1893	460	81	535	352	151	988	163	225	73							222	226	350	27	12	182	450	47	349	370
	1765	204	203	500	455	183	1018	97	239	122							297	365	581	4	34	161	238	77	482	434
	1701	303	120	459	477	145	1247	19	115	87							250	89	389	17	101	176	174	84	411	364
	1945	336	220	550	371	119	1273	5	25	105							191	132	174	12	74	138	322	105	381	290
	2987	321	211	358	309	121	1209	94	40	71							201	190	71	16	88	125	225	91	341	324
	2272	140	272	247	318	43	1067	14	61	25							216	271	340	2	103	115	360	32	336	273
	1559	194	322	150	404	77	1313	27	17	51							109	254	295	2	143	21	425	37	137	200
	2135	89	250	185	482	95	1125	23	23	94							133	283	345	4	88	55	424	35	183	132
	1518	123	204	146	456	129	717	83	121	62							136	287	98	0	34	102	251	14	155	285
	1104	173	60	122	360	146	285	68	49	39							15	417	60	4	15	108	100	20	128	280
	1057	74	137	291	389	59	492	64	144	16							23	514	123	7	34	98	133	6	216	189
	858	63	104	124	391	52	496	48	179	38							2	745	171	3	65	56	97	13	109	151
	335	86	112	172	537	124	468	29	74	10							3	549	47	2	55	164	44	6	132	93
	337	47	43	110	547	85	278	59	73	35							33	510	34	6	28	165	6	8	137	59
	731	103	30	107	518	164	116	124	35	57							8	584	66	3	38	155	69	7	182	98
	438	189	134	78	397	148	115	197	21	87							23	251	43	10	26	115	83	10	139	74
	463	36	79	142	272	111	133	239	54	140							35	575	61	8	12	136	41	8	89	47
	387	156	166	122	279	5	64	117	52	104							47	571	45	1	30	145	26	0	238	50
	354	102	141	123	481	0	43	182	66	100							60	193	25	0	43	131	27	2	361	3
	106	208	140	143	270	13	5	68	48	190							61	178	7	4	11	275	107	8	314	51
	142	184	288	118	334	27	94	87	64	134							85	319	6	0	26	347	169	8	217	70
	214	247	345	194	358	12	172	62	13	100							93	201	0	0	63	136	80	13	108	41
	177	202	395	142	475	117	20	55	73	187							118	106	1	0	8	283	87	16	106	63
	251	334	311	100	455	104	55	60	82	177							113	192	7	3	10	253	82	50	64	69
	213	419	321	78	419	63	76	25	63	246							43	179	30	1	2	122	7	113	93	160
	241	411	282	106	487	136	35	60	35	176							49	162	0	2	43	73	17	133	129	107
	196	450	83	204	444	132	24	130	7	126							82	213	4	3	5	90	8	75	105	62
	122	325	148	221	354	160	4	60	45	108							64	250	0	5	3	69	7	119	114	100
	215	411	119	118	229	186	6	63	50	79							41	188	0	5	22	62	11	117	109	62
	490	491	133	188	271	78	1	123	1	117							15	208	0	2	25	127	16	120	95	28
	275	444	143	374	183	150	8	121	1	90							7	148	0	2	18	70	79	179	45	87
	145	544	55	170	328	111	13	132	37	189							40	324	0	0	7	90	133	217	67	136
	361	201	103	147	367	126	24	154	63	137							44	207	0	2	1	42	150	204	60	150
	252	203	121	70	355	136	17	89	10	133							31	249	0	0	1	97	54	192	18	102
	224	224	120	45	337	45	26	134	28	178							7	181	0	1	9	48	40	134	13	150
	295	305	176	187	348	83	63	150	59	208							21	35	7	5	1	11	16	70	52	182
	336	165	159	83	370	31	93	79	4	427							64	62	2	2	2	28	1	157	65	80
	168	86	130	159	434	0	165	49	40	172							140	87	0	2	9	43	4	179	23	50
	271	20	102	106	485	55	103	74	56	273							172	29	1	0	2	7	3	64	21	72
	119	93	73	189	585	90	137	12	124	416							196	26	0	4	0	4	6	34	20	93
	150	39	153	179	492	53	86	75	77	270							175	15	0	5	3	2	4	23	0	41
	575	58	28	258	407	107	25	19	133	168							168	8	0	3	0	0	18	13	0	88
	835	17	67	284	366	76	52	61	100	111							111	18	0	3	3	7	1	6	1	51
	632	0	159	274	315	104	27	97	134	39							41	5	0	5	0	3	8	2	0	15
	675	16	178	174	146	117	41	0	174	44							21	10	3	0	3	1	0	4	0	32
	615	125	103	179	263	146	80	16	106	59							6	7	0	2	0	0	17	0	0	28
	424	331	138	107	340	124	125	42	36	33							34	41	1	0	2	12	0	2	0	6
	537	257	105	242	338	128	93	21	34	6							46	124	0	10	12	1	16	9	2	9
	428	335	135	167	151	132	57	35	32	2							16	123	0	0	10	3	1	27	1	15
	949	416	1	48	131	108	79	48	94	27							50	53	0	1	17	30	6	28	0	4
	764	331	207	46	125	37	15	26	92	29							57	79	0	0	23	23	7	2	0	10
	434	250	459	60	92	7	8	114	23	4							12	81	3	2	15	3	9	0	0	4
	980	156	426	63	101	6	10	68	125	0							21	59	7	0	4	22	12	7	0	20
	886	166	433	90	302	2	17	17	40	1							59	73	0	0	0	26	0	0	0	119
	633	154	262	71	181	8	49	58	1	1							49	49	3	7	8	43	6	0	0	170
	533	112	136	54	135	22	50	29	39	15							22	15	0	5	1	101	11	2	0	128
	276	210	150	66	170	2	64	8	41	1							40	2	1	0	5	55	5	2	0	99
	311	135	242	88	90	26	63	33	1	47							41	50	0	0	8	118	13	0	0	77
	346	234	197	102	23	20	96	61	52	35							25	106	0	0	2	115	0	0	0	65
	326	300	128	74	226	1	150	24	1	30							17	189	0	0	10	17	11	9	6	46
	469	519	132	26	294	9	89	50	46	19							46	250	6	0	26	31	15	8	15	62
	700	441	180	33	131	0	111	6	10	1							114	286	0	4	8	20	6	4	23	20
	747	295	298	23	260	0	195	70	45	0							34	222	0	0	13	77	20	0	21	25
	1093	392	235	5	164	0	309	39	82	0							14	234	0	3	65	73	1	8	24	7
	1031	469	249	2	199	0	415	15	38	1							19	124	1	1	111	70	26	8	26	47
	907	494	387	2	350	18	344	40	130	10							37	235	0	0	19	32	27	0	28	36
	691	769	303	0	234	16	414	21	134	10							14	258	0	0	4	102	11	0	27	43
	663	907	300	0	168	8	296	14	230	36							3	243	0	2	25	53	35	1	43	55
	556	809	285	0	196	44	220	0	55	78							18	88	3	0	87	51	0	4	33	53
	274	578	197	0	173	52	67	7	12	48							61	159	1	1	61	156	17	0	28	54
	324	711	294	0	88	24	120	0	124	45							28	129	1	1	51	152	27	1	15	49
	625	754	349	1	185	94	128	0	80	99							27	17	0	4	44	116	0	0	13	60
	608	544	397	0	153	131	151	0	25	112							1	176	4	3	152	20	32	0	8	28
	624	651	296	0	143	24	97	6	109	119							0	61	0	3	267	79	13	1	16	18
	551	666	349	0	341	35	102	70	43	73							0	37	0	0	129	63	38	1	12	14
	705	679	376	6	332	76	178	88	174	37							1	9	0	3	216	29	28	2	16	3
	920	518	398	24	381	66	131	56	48	95							9	96	2	1	67	62	15	8	30	5
	971	506	376	30	366	69	31	70	79	58							1	207	3	1	20	8	38	4	17	0
	755	482	297	75	271	44	77	40	67	45							53	90	0	0	101	57	0	0	33	0
	518	368	561	101	234	60	114	115	88	51							116	97	0	2	196	42	12	0	39	4
	577	386	289	194	129	101	80	12	111	54							103	34	3	1	282	13	26	1	34	12
	978	292	250	214	171	40	183	84	81	37							20	24	26	0	62	49	0	7	21	18
	959	257	255	101	158	92	191	53	95	10							5	15	24	1	59	77	26	0	40	15
	887	218	118	94	189	127	162	22	80	2							66	27	40	0	202	24	22	6	34	11
	519	132	212	109	62	106	170	13	139	6							19	7	20	0	81	18	20	0	13	30
	415	178	217	70	191	98	110	70	38	1							18	15	2	1	88	12	22	0	0	17
	235	31	64	75	93	125	161	88	2	15							33	26	1	0	101	4	3	0	0	0
	288	46	164	50	147	51	191	106	96	19							37	36	5	0	65	4	34	0	15	9
	169	69	232	32	186	61	197	136	80	11							38	21	0	0	66	6	5	0	0	3
	249	70	182	39	102	45	185	83	29	3							37	28	9	0	114	1	8	0	0	3
	298	127	226	79	63	21	164	108	88	0							15	44	17	0	113	3	23	3	3	4
	202	92	138	56	80	31	37	107	81	0							10	19	6	0	111	16	0	0	1	3
	240	72	322	10	33	21	87	20	51	3							22	14	11	0	108	10	23	2	0	1
	239	11	97	8	64	0	108	120	162	0							38	15	51	0	70	0	12	1	0	0
	195	29	67	7	32	91	5	0	87	0							24	32	117	0	46	0	7	0	1	1
	92	36	104	1	41	87	93	96	27	0							108	22	58	0	75	1	40	0	8	4
	73	24	126	31	27	81	144	16	95	0							136	25	18	0	84	15	0	0	0	4
	49	77	70	30	16	145	18	32	13	0							10	13	2	0	101	11	32	0	1	4
	93	153	23	4	1	126	55	5	69	0							47	33	15	0	163	0	17	0	3	3
	192	138	48	20	3	150	17	56	0	0							132	7	39	0	19	0	22	0	4	5
	400	149	20	9	7	148	44	68	58	0							79	25	69	0	35	1	57	0	1	1
	454	157	0	2	4	84	82	64	45	0							73	42	84	0	69	7	14	0	5	4
	493	80	37	5	7	119	13	89	36	0							58	21	68	0	157	1	31	0	2	0
	458	89	51	21	3	144	75	7	70	0							10	6	7	0	90	0	13	0	7	0
	289	43	92	32	5	98	45	33	0	0							16	3	22	0	25	0	17	0	0	0
	270	34	127	20	2	50	15	7	67	23							27	11	107	0	89	0	43	0	1	0
	418	42	81	5	0	45	8	0	0	103							56	16	253	0	127	0	12	0	0	0
	483	2	127	0	0	19	36	20	59	24							58	29	146	1	95	2	21	0	0	0
	387	0	59	7	5	68	45	2	58	31							93	4	1	0	59	0	6	0	0	0
	538	7	71	4	6	36	37	0	28	9							80	7	7	0	82	0	6	0	0	0
	375	1	92	3	84	18	2	0	70	4							7	6	8	0	160	0	33	0	0	0
	319	19	140	9	261	62	0	3	33	0							35	23	81	1	172	0	5	0	0	0
	380	16	112	31	254	68	0	0	50	3							37	21	188	7	155	0	36	0	0	0
	583	135	35	47	225	23	10	0	137	5							69	1	300	11	126	3	30	3	0	1
	717	196	18	43	175	33	7	9	107	1							42	17	368	0	171	0	47	1	0	0
	850	214	11	90	219	23	0	35	147	7							15	3	438	0	175	0	50	0	0	0
	641	188	43	76	152	13	16	53	116	69							72	14	607	2	159	0	12	4	0	0
	657	112	109	56	156	87	7	125	54	54							56	11	685	0	178	0	23	0	0	0
	969	51	108	63	182	59	5	66	80	83							41	0	630	3	169	0	34	0	1	0
	724	58	101	10	200	2	54	106	88	111							52	5	465	4	87	0	25	2	0	0
	545	142	53	9	206	22	188	26	60	103							65	10	529	0	108	0	15	0	0	0
	502	144	35	3	130	17	255	50	92	123							89	10	591	4	111	0	43	0	2	0
	539	164	81	14	163	0	234	67	275	101							59	32	736	0	98	0	61	0	0	3
	709	147	7	45	19	36	217	129	227	45							124	20	676	0	89	0	15	0	0	0
	475	124	5	24	138	71	122	92	66	84							85	1	427	0	53	0	51	0	0	1
	272	117	1	50	95	7	162	128	11	96							67	7	268	0	41	1	15	0	0	0
	311	92	107	42	56	22	185	49	64	99							158	6	184	1	77	0	9	0	0	1
	60	62	213	17	26	33	67	64	70	96							96	15	32	0	68	0	14	0	0	0
	150	75	297	64	140	0	80	12	4	77							11	15	2	0	104	0	30	0	0	0
	328	55	405	75	130	1	2	31	50	22							57	5	1	1	135	0	13	0	0	1
	325	35	228	12	60	7	141	21	105	34							134	2	0	0	183	2	16	0	0	4
	360	58	151	24	109	12	96	33	58	46							90	19	0	0	181	0	4	0	0	1
	246	60	311	15	129	8	33	28	91	25							78	1	0	0	166	0	28	0	0	0
	111	55	503	15	61	100	5	38	59	74							31	1	0	0	174	1	15	0	0	0
	129	36	451	29	131	121	1	12	56	52							10	6	0	0	157	0	32	0	0	27
	240	30	423	14	153	140	13	48	90	66							60	0	0	0	143	4	42	0	0	26
	107	9	440	75	47	105	16	13	98	81							176	10	0	0	163	0	5	0	0	39
	75	9	543	73	107	70	0	12	49	62							76	1	0	0	111	2	15	0	0	11
	157	4	556	30	14	3	19	9	65	29							0	43	0	1	90	0	11	0	0	5
	146	4	518	58	5	32	32	1	66	55							4	40	0	0	109	0	3	0	0	21
	191	6	468	85	44	47	1	20	42	27							19	64	0	0	135	0	14	0	0	71
	83	5	546	164	125	15	35	1	70	47							27	53	0	0	258	0	5	0	0	26
	65	9	673	69	166	68	3	0	2	31							39	36	0	0	154	0	33	0	0	45
	55	1	715	31	164	51	0	26	0	0							13	24	0	0	16	0	0	0	0	15
	50	3	770	23	235	28	12	78	16	0							2	17	0	0	24	0	13	0	0	14
	13	14	741	23	139	35	26	36	17	8							20	1	0	0	32	0	9	0	0	51
	18	15	702	61	106	61	18	13	14	12							1	1	0	0	80	0	4	0	0	62
	60	1	685	30	71	42	2	37	15	0							1	25	0	0	46	0	32	0	0	61
	165	23	598	7	122	57	76	137	7	3							4	25	0	1	77	0	1	0	0	65
	367	6	747	69	171	36	92	95	3	29							0	16	0	0	138	0	11	0	0	11
	547	35	763	29	154	55	126	1	2	10							1	16	0	0	213	0	17	0	0	58
	526	66	713	100	133	84	105	17	0	27							10	14	0	0	150	1	0	0	0	13
	458	89	606	32	73	62	63	44	0	0							22	65	0	0	109	0	25	0	0	14
	557	112	561	3	112	102	71	1	0	0							19	81	0	0	223	6	9	0	0	79
	385	98	481	23	156	107	38	26	3	2							31	137	0	0	235	2	13	0	0	105
	487	52	355	23	166	10	34	16	5	0							5	19	0	0	113	0	25	0	0	7
	531	28	223	15	200	48	118	5	3	0							1	173	0	0	67	1	14	0	0	8
	835	45	258	74	152	18	140	3	8	0							13	127	0	0	42	0	31	0	0	52
	894	65	311	45	99	43	124	7	0	2							17	167	0	0	22	0	3	0	0	37
	923	58	272	13	58	90	212	93	20	0							10	66	0	0	115	0	34	0	0	44
	768	59	305	8	54	74	213	63	62	4							4	65	0	0	167	0	25	0	0	63
	360	78	240	12	22	61	112	80	0	0							20	31	0	0	181	0	12	0	0	26
	455	66	243	62	62	76	215	88	23	0							33	47	0	0	186	0	29	0	0	87
	528	75	247	80	62	82	51	101	7	8							68	62	0	0	147	0	3	0	0	19
	393	129	164	5	115	127	141	162	1	82							95	14	0	0	117	0	6	0	0	20
	223	145	95	23	101	27	265	142	7	146							105	39	0	0	95	0	28	0	0	47
	386	96	143	16	45	1	209	94	50	138							55	42	0	1	91	0	3	0	0	0
	366	114	104	2	82	32	156	53	38	212							45	42	0	0	121	0	24	0	0	2
	416	207	111	2	45	4	103	47	35	220							39	29	0	0	123	0	28	0	0	8
	305	497	153	9	24	0	55	34	103	305							56	86	0	0	47	0	0	0	0	42
	423	397	192	3	52	9	167	111	21	444							53	22	0	0	6	0	31	0	0	67
	632	367	224	4	120	2	177	169	84	428							14	24	0	0	15	0	11	0	0	12
	1019	415	263	49	66	31	43	205	16	359							12	119	0	0	10	0	5	0	0	0
	820	472	257	49	80	90	13	209	13	385							5	98	0	0	27	0	39	0	0	8
	447	446	240	57	43	118	13	128	44	347							9	90	0	0	31	0	7	0	0	1
	490	284	252	56	48	98	31	100	116	281							11	151	0	0	6	0	30	0	0	0
	302	169	219	67	24	145	104	154	62	215							20	219	0	0	8	0	37	0	0	5
	391	129	324	137	54	100	139	151	139	226							110	158	0	0	2	0	0	0	0	122
	291	112	309	136	47	43	156	217	91	223							83	220	0	0	24	3	23	0	0	260
	353	166	312	134	145	15	147	262	113	141							8	83	0	0	12	0	16	0	0	293
	517	252	325	145	217	0	19	257	105	162							38	47	0	0	18	0	1	0	0	208
	717	277	258	133	145	23	80	206	33	138							64	179	0	1	11	0	27	0	0	135
	791	319	209	151	171	78	220	236	129	148							32	126	0	0	39	0	6	0	0	66
	613	15	217	130	232	112	84	193	165	275							3	140	0	0	102	0	38	0	0	64
	384	36	168	80	119	73	202	190	290	350							58	95	0	0	146	0	42	0	0	30
	307	80	44	27	123	86	89	214	133	267							66	75	0	0	146	0	5	0	0	24
	306	99	128	10	146	55	17	183	125	287							42	227	0	0	124	0	43	0	0	7
	313	233	85	24	194	144	112	119	135	286							45	302	0	0	68	0	8	0	0	10
	345	210	53	38	95	15	160	68	92	199							35	215	0	0	64	0	30	0	0	31
	294	145	119	26	175	21	54	136	117	65							53	524	0	0	17	0	29	0	0	22
	340	72	95	3	232	45	168	161	220	154							67	678	0	0	13	0	0	0	0	26
	265	106	99	29	243	45	128	194	225	144							16	273	0	1	3	0	36	0	0	2
	135	136	103	62	168	4	192	258	184	179							2	434	0	1	5	0	7	0	0	0
	247	210	54	72	199	100	159	275	40	156							2	514	0	0	8	0	22	0	0	8
	193	11	20	92	154	118	280	252	11	209							66	451	0	0	22	0	42	0	0	6
	177	84	5	81	189	68	134	200	1	152							5	303	0	0	4	0	1	0	0	9
	139	162	13	75	226	132	168	101	0	244							79	256	0	0	12	0	25	0	0	4
	244	35	4	52	319	201	155	235	0	151							56	239	0	0	40	1	12	0	0	1
	278	152	7	57	401	178	144	215	7	112							5	298	0	1	44	0	3	0	0	0
	181	69	5	45	358	116	261	103	59	67							21	293	0	3	73	0	36	0	0	0
	210	150	13	40	396	101	232	143	0	105							5	247	0	10	79	1	18	0	0	1
	150	32	11	63	265	33	362	182	34	19							15	245	0	5	38	0	5	0	0	2
	227	15	17	36	365	18	147	257	3	44							0	403	0	2	58	0	30	0	0	0
	259	39	7	65	511	31	94	165	0	75							42	462	0	0	92	0	2	0	0	2
	273	12	4	96	426	14	110	63	1	73							39	393	0	0	80	0	20	0	0	1
	289	4	8	87	409	8	230	63	10	138							24	171	0	0	81	0	16	0	0	1
	199	28	3	112	459	52	271	74	18	163							70	200	0	0	147	1	2	0	0	2
	206	55	18	94	456	33	229	87	138	170							63	131	0	0	55	0	26	0	0	1
	211	74	22	58	472	39	252	31	328	69							44	50	0	1	39	0	7	0	0	0
	193	131	18	83	390	39	39	45	329	112							138	136	0	0	102	0	9	0	0	0
	146	117	12	92	384	36	123	31	136	131							135	187	0	1	26	0	30	0	0	0
	55	251	30	105	368	10	203	28	184	155							87	140	0	0	14	0	0	0	0	0
	130	453	20	105	480	58	246	12	263	115							42	125	0	0	55	0	22	0	0	0
	122	554	11	57	459	58	336	10	239	42							66	111	0	0	24	0	19	0	0	0
	85	494	25	58	478	5	373	36	132	125							36	165	0	0	31	0	4	0	0	0
	116	645	1	47	401	1	269	96	184	120							5	64	0	0	35	0	37	0	0	0
	85	333	0	21	530	12	519	68	29	127							59	128	0	0	7	0	4	0	0	0
	100	373	9	47	752	15	332	85	74	110							54	105	0	0	96	0	15	0	0	0
	103	402	0	27	782	116	194	78	159	136							28	15	0	0	121	0	24	0	0	0
	63	270	16	26	876	121	224	3	184	113							23	20	0	0	62	0	0	0	0	0
	104	132	35	8	669	111	189	8	148	79							53	22	0	0	27	0	25	0	0	0
	17	158	30	1	626	121	90	25	71	87							61	23	0	0	113	0	30	0	0	0
	32	271	3	7	592	99	178	47	151	131							15	87	0	0	252	0	0	0	0	0
	10	394	17	0	402	18	155	48	19	106							3	43	0	0	264	0	29	0	0	0
	62	387	0	0	533	76	112	15	105	110							27	116	0	0	245	0	28	0	0	0
	58	278	14	2	705	9	139	11	91	66							12	29	0	0	222	0	6	0	0	0
	93	287	2	7	601	14	30	30	136	60							23	18	0	0	49	0	39	0	0	0
	103	102	4	18	627	19	73	9	94	77							95	79	0	0	2	0	23	0	0	0
	108	70	3	0	874	3	44	5	70	80							59	100	4	0	9	0	3	0	0	0
	70	92	41	5	844	3	156	1	165	32							30	170	3	0	39	0	33	0	0	0
	86	10	39	0	486	44	63	37	228	45							66	224	0	0	130	0	13	0	0	0
	14	4	61	1	514	37	6	32	184	4							74	179	0	0	169	0	10	0	0	0
	29	9	29	1	679	23	1	12	193	105							27	73	0	0	184	0	25	0	0	0
	67	31	100	25	789	44	0	21	172	169							17	108	0	0	179	0	0	0	0	0
	23	27	67	29	799	77	1	0	181	155							24	98	0	0	94	0	24	0	0	0
	2	16	98	5	739	63	9	2	213	118							55	17	0	0	9	0	14	0	0	0
	9	46	119	14	844	6	106	1	229	60							66	56	0	0	0	0	0	0	0	0
	23	68	123	0	719	35	119	21	230	10							49	31	0	0	16	0	31	0	0	0
	17	54	167	4	814	0	87	0	245	45							4	128	0	0	14	1	12	0	0	0
	11	94	234	5	689	25	55	2	158	40							14	119	0	0	13	0	3	0	0	0
	16	23	388	2	675	80	38	0	128	10							1	166	0	0	80	0	37	0	0	0
	4	2	287	1	449	114	61	0	41	13							5	77	0	0	136	0	7	0	0	0
	0	7	334	7	289	67	24	2	115	14							8	50	0	0	50	0	11	0	0	0
	1	6	405	29	483	90	58	25	111	62							7	41	0	0	25	0	25	0	0	0
	6	0	313	35	122	72	293	42	96	62							2	44	0	0	23	0	1	0	0	0
	14	3	174	36	266	99	511	22	125	13							1	107	0	0	84	0	12	0	0	0
	6	9	444	91	523	32	563	39	228	6							0	184	0	0	144	0	17	0	0	0
	1	9	311	104	349	6	530	31	196	22							3	174	0	0	148	0	0	0	0	0
	0	1	462	51	546	9	340	14	156	17							1	53	0	0	108	0	27	0	0	0
	0	1	117	55	531	66	119	49	117	35							0	175	0	0	82	0	3	0	0	0
	8	0	60	42	617	33	136	90	170	25							1	170	0	0	37	0	6	0	0	0
	0	4	140	44	557	61	131	58	167	9							5	170	0	0	24	0	21	0	0	0
	5	16	147	62	406	166	116	90	29	55							1	174	0	0	31	0	3	0	0	0
	35	102	153	41	365	217	137	91	54	36							0	69	0	0	29	0	19	0	0	0

## Sheet: Motion traces_G6
G6_Trial1																G6_Trial10
	Mouse 1	Mouse 2	Mouse 3	Mouse 4	Mouse 5	Mouse 6	Mouse 7	Mouse 8	Mouse 9	Mouse 10							Mouse 1	Mouse 2	Mouse 3	Mouse 4	Mouse 5	Mouse 6	Mouse 7	Mouse 8	Mouse 9	Mouse 10
	140	350	687	2	34	84	552	330	755	24							0	0	0	0	0	0	0	0	0	0
	74	332	638	6	117	136	890	342	1043	39							0	0	0	0	0	0	0	0	0	0
	103	327	546	0	89	162	720	274	1027	41							0	0	0	0	0	0	0	0	0	0
	240	362	557	8	80	175	581	178	700	3							0	4	0	0	0	0	0	0	0	0
	230	374	547	71	11	173	446	180	299	5							0	0	0	0	0	0	0	0	0	0
	247	265	439	76	22	213	668	171	236	11							0	0	0	0	0	0	0	0	0	0
	139	297	455	143	0	150	704	175	280	9							0	1	0	0	0	0	0	0	0	0
	69	364	219	33	14	67	473	167	837	4							0	4	0	0	0	0	0	0	0	0
	189	318	198	62	28	76	381	109	1227	11							0	0	0	0	0	0	0	0	0	0
	570	415	227	9	34	60	404	123	1421	18							0	1	0	0	0	0	0	0	0	0
	727	429	173	107	2	71	796	142	1552	8							0	0	0	0	0	0	0	0	0	0
	850	501	105	248	4	90	967	166	1543	13							0	0	0	0	0	0	0	0	0	0
	815	454	84	293	47	207	1199	285	1449	30							0	0	0	0	0	0	0	0	0	0
	942	468	159	143	12	205	776	338	996	12							0	6	0	0	0	0	0	0	0	0
	1016	471	145	97	2	112	654	303	789	38							0	14	0	0	0	0	0	0	0	0
	884	755	209	130	14	49	775	280	699	1							0	0	0	0	0	0	0	0	0	0
	927	526	223	190	4	30	598	229	706	36							0	4	0	0	0	0	0	0	0	0
	1023	502	190	214	57	115	613	210	511	48							0	43	0	0	0	0	0	0	0	0
	1042	359	207	158	78	202	601	195	679	12							0	24	0	0	0	0	0	0	0	0
	1053	447	245	246	57	82	532	148	607	62							0	7	0	0	0	0	0	0	0	0
	1021	454	215	152	32	105	448	86	670	9							0	20	0	0	0	0	0	0	0	0
	737	512	235	35	32	134	523	106	788	25							0	51	0	0	0	0	0	0	0	0
	845	425	78	42	36	34	62	121	788	36							0	84	0	0	0	0	0	0	0	0
	596	347	59	53	24	124	456	206	895	17							0	125	0	0	0	0	0	0	0	0
	470	314	26	27	39	27	596	165	925	25							0	73	0	0	0	0	0	0	0	0
	525	337	69	55	50	17	771	233	935	27							0	49	0	0	0	0	0	0	0	0
	566	423	135	93	76	53	709	317	936	58							0	42	0	0	0	0	0	0	0	0
	497	513	174	123	4	26	1000	368	787	62							0	5	0	1	0	0	0	0	0	0
	336	658	161	173	24	38	1252	391	787	34							0	36	0	0	0	0	0	0	0	0
	256	755	233	151	90	40	1200	343	745	66							0	44	0	0	0	0	0	0	0	0
	337	801	154	187	179	5	908	378	650	38							0	19	0	1	0	0	0	0	0	0
	629	895	74	113	244	7	1004	436	789	46							0	102	0	0	0	0	0	0	0	0
	711	985	77	91	246	13	944	386	680	49							0	111	0	0	0	0	0	0	0	0
	634	926	120	159	206	21	1001	380	662	11							0	70	0	0	0	0	0	0	0	0
	810	1081	26	211	274	21	1012	341	257	4							0	238	0	0	0	0	0	0	0	0
	731	1140	59	260	332	22	852	392	325	12							0	155	0	0	0	0	0	0	0	0
	559	1047	167	221	437	117	717	417	216	17							0	112	0	0	0	0	0	0	0	0
	349	1151	186	143	335	203	894	326	158	2							0	190	0	3	0	0	0	0	0	0
	315	1146	107	68	396	248	831	328	87	4							0	98	0	0	0	0	0	0	0	0
	348	946	103	106	503	312	1283	299	167	12							0	66	0	0	0	0	0	0	0	0
	442	747	146	123	754	365	1076	175	158	8							0	309	0	0	0	0	0	0	0	0
	341	760	96	50	754	405	744	130	95	1							0	243	0	0	0	0	0	0	0	0
	280	969	49	163	843	409	577	69	97	13							0	81	0	1	0	0	0	0	0	0
	221	833	64	237	685	428	377	40	41	12							0	57	0	9	0	0	0	0	0	0
	249	871	104	272	800	454	503	42	141	20							0	63	0	3	0	0	0	0	0	0
	203	569	128	217	813	526	695	26	233	4							0	227	0	2	0	0	0	0	0	0
	175	674	76	220	825	388	880	13	331	7							0	147	0	0	0	0	0	0	0	0
	91	616	98	184	811	361	667	36	906	3							0	153	0	2	0	0	0	0	0	0
	51	383	54	188	633	491	551	20	1087	31							0	141	0	1	0	0	0	0	0	0
	212	779	79	207	398	427	665	21	1208	6							0	13	0	7	0	0	0	0	0	0
	237	646	53	203	357	354	708	5	1136	22							0	71	0	7	0	0	0	0	0	0
	149	583	77	103	314	186	574	16	804	2							0	35	0	16	0	0	0	0	0	0
	266	580	19	120	207	96	319	20	840	63							0	111	0	5	0	0	0	0	0	0
	392	632	54	172	207	38	488	0	894	20							0	109	0	2	0	0	0	0	0	0
	207	656	4	99	220	56	682	18	741	55							0	106	0	0	0	0	0	0	0	0
	235	301	127	77	181	136	558	21	561	80							0	89	0	0	0	0	0	0	0	0
	254	612	141	92	86	30	215	28	371	92							0	11	0	0	0	0	0	0	0	0
	239	329	58	101	51	57	112	48	341	88							0	402	0	1	0	0	0	0	0	0
	418	319	40	166	126	29	234	36	206	22							0	296	0	7	0	0	0	0	0	0
	487	268	22	258	683	47	290	28	49	125							0	179	0	13	0	0	0	0	0	0
	531	308	7	138	615	33	466	23	191	34							0	184	0	10	0	0	0	0	0	0
	442	361	88	145	798	21	263	33	191	49							0	86	0	2	0	0	0	0	0	0
	480	429	78	93	838	38	265	7	197	15							0	16	0	0	0	0	0	0	0	0
	481	818	30	79	889	16	423	39	255	70							0	19	0	0	0	0	0	0	0	0
	417	695	27	73	1000	11	360	44	461	35							0	147	0	1	0	0	0	0	0	0
	720	596	17	74	990	21	440	102	584	83							0	112	0	0	0	0	0	0	0	0
	795	669	59	68	947	22	446	102	551	14							0	32	0	3	0	0	0	0	0	0
	958	769	71	148	646	39	270	133	629	15							0	16	0	1	0	0	0	0	0	0
	671	773	48	174	459	127	346	124	562	61							0	55	0	10	0	0	0	0	0	0
	861	886	56	221	598	189	582	67	595	127							0	13	0	0	0	0	0	0	0	0
	773	947	35	263	601	276	684	55	892	22							0	2	0	0	0	0	0	0	0	0
	824	653	107	260	481	249	695	44	891	60							0	9	0	2	0	0	0	0	0	0
	630	635	150	278	525	154	414	17	934	13							0	82	0	0	0	0	0	0	0	0
	642	666	156	259	347	138	479	15	920	11							0	31	0	2	0	0	0	0	0	0
	485	760	167	315	345	100	269	44	819	13							0	15	0	7	0	0	0	0	0	0
	419	543	143	216	246	40	230	85	1012	6							0	26	0	3	0	0	0	0	0	0
	630	580	27	266	446	83	119	89	1027	8							0	10	0	4	0	0	0	0	0	0
	832	566	146	236	357	79	233	76	979	9							0	9	0	28	0	0	0	0	0	0
	660	396	159	211	544	37	26	118	996	6							0	99	0	0	0	0	0	0	0	0
	584	419	317	127	697	33	67	105	636	5							0	146	0	9	0	0	0	0	0	0
	510	514	363	59	706	20	52	218	702	42							0	113	0	16	0	0	0	0	0	0
	392	392	314	117	633	33	161	231	573	9							0	94	0	18	0	0	0	0	0	0
	384	307	338	18	681	41	236	198	519	39							0	41	0	14	0	0	0	0	0	0
	414	188	439	11	680	34	221	144	331	46							0	0	0	12	0	0	0	0	0	0
	428	226	407	66	552	25	271	165	140	46							0	9	0	3	0	0	0	0	0	0
	430	288	359	141	481	10	269	161	153	44							0	0	0	9	0	0	0	0	0	0
	281	324	287	189	376	3	331	142	32	54							0	3	0	6	0	0	0	0	0	0
	239	515	103	149	288	5	279	158	148	70							0	16	0	4	0	0	0	0	0	0
	266	662	225	161	97	123	284	134	232	27							0	5	0	5	0	0	0	0	0	0
	251	307	286	213	326	320	307	110	179	5							0	0	0	7	0	0	0	0	0	0
	506	202	374	272	342	393	127	105	339	22							0	2	0	15	0	0	0	0	0	0
	785	373	159	172	364	353	128	117	495	43							0	0	0	11	0	0	0	0	0	0
	729	407	55	198	233	316	137	134	380	27							0	0	0	39	0	0	0	0	0	0
	523	228	106	112	117	485	126	114	340	35							0	0	0	132	0	0	0	0	0	0
	253	244	43	96	177	559	117	116	293	19							0	2	0	120	0	0	0	0	0	0
	391	229	28	135	219	385	146	34	346	18							0	6	0	167	0	0	0	0	0	0
	183	390	118	118	171	374	90	35	354	7							0	1	0	122	0	0	0	0	0	0
	307	492	210	69	152	445	10	112	375	12							0	0	0	73	0	0	0	0	0	0
	544	381	272	263	199	371	183	62	250	20							0	0	0	115	0	0	0	0	0	0
	812	495	430	254	215	309	224	75	123	77							0	0	0	13	0	0	0	0	0	0
	797	274	569	301	133	233	291	146	530	107							0	0	0	29	0	0	0	0	0	0
	721	534	586	263	94	184	199	137	904	101							0	0	0	15	0	0	0	0	0	0
	920	1168	634	194	194	164	252	113	1081	211							0	0	0	24	0	0	0	0	0	0
	819	1266	670	178	152	105	187	109	1181	62							0	0	0	28	0	0	0	0	0	0
	540	1117	721	149	175	59	128	21	1164	69							0	0	0	11	0	0	0	0	0	0
	475	306	741	175	303	33	26	36	824	189							0	22	0	89	0	0	0	0	0	0
	191	420	668	221	258	75	27	92	668	170							0	0	0	118	0	0	0	0	0	0
	102	150	650	175	184	28	20	158	517	134							0	1	0	79	0	0	0	0	0	0
	82	143	596	147	205	23	65	82	513	108							0	1	0	11	0	0	0	0	0	0
	160	106	350	132	231	36	65	128	617	85							0	0	0	25	0	0	0	0	0	0
	138	191	308	122	258	28	19	118	660	190							0	0	0	62	0	0	0	0	0	0
	151	185	595	142	205	2	36	104	807	300							0	0	0	52	0	0	0	0	0	0
	228	475	587	189	223	2	124	29	741	349							0	0	0	88	0	0	0	0	0	0
	150	712	448	209	212	14	159	84	667	185							0	0	0	14	0	0	0	0	0	0
	76	742	507	273	199	20	53	67	387	105							0	15	0	60	0	0	0	0	0	0
	27	630	515	221	133	5	97	23	537	151							0	0	0	43	0	0	0	0	0	0
	12	334	370	237	25	14	111	33	453	237							0	0	0	25	0	0	0	0	0	0
	1	217	441	345	40	7	51	19	233	132							0	0	0	53	0	0	0	0	0	0
	11	196	514	287	68	17	43	136	143	101							0	0	0	189	0	0	0	0	0	0
	38	93	530	255	64	15	40	246	73	122							0	6	0	45	0	0	0	0	0	0
	1	241	533	353	154	6	114	423	99	140							0	21	0	9	0	0	0	0	0	0
	7	608	554	343	151	31	6	377	118	158							0	0	0	68	0	0	0	0	0	0
	26	916	565	345	82	13	28	384	125	177							0	21	0	20	0	0	0	0	0	0
	11	925	498	457	120	1	48	374	155	192							0	0	0	112	0	0	0	0	0	0
	265	754	315	567	263	9	7	413	91	120							0	0	0	5	0	0	0	0	0	0
	373	453	392	622	272	4	10	263	80	127							0	0	0	2	0	0	0	0	0	0
	257	640	297	761	324	2	56	211	176	138							0	0	0	27	0	0	0	0	0	0
	236	582	367	770	108	1	17	306	165	153							0	0	0	49	0	0	0	0	0	0
	313	545	393	697	146	9	37	203	30	84							0	2	0	30	0	0	0	0	0	0
	120	449	165	704	448	0	41	97	10	132							0	0	0	72	0	0	0	0	0	0
	216	373	261	607	805	16	27	66	9	133							0	0	0	27	0	0	0	0	0	0
	142	416	449	526	373	2	51	60	23	97							0	0	0	34	0	0	0	0	0	0
	61	430	433	397	383	0	83	42	9	62							0	59	0	28	0	0	0	0	0	0
	24	728	262	395	403	6	15	70	5	14							0	0	0	21	0	0	0	0	0	0
	54	845	253	424	165	0	42	97	2	30							0	1	0	16	0	0	0	0	0	0
	26	598	402	453	77	7	21	72	0	54							0	0	0	18	0	0	0	0	0	0
	34	470	109	491	137	4	1	60	26	13							0	13	0	24	0	0	0	0	0	0
	42	383	126	460	305	1	10	80	307	50							0	0	0	150	0	0	0	0	0	0
	240	380	146	472	307	0	41	29	103	30							0	0	0	80	0	0	0	0	0	0
	140	472	131	156	257	3	15	10	35	25							0	0	0	49	0	0	0	0	0	0
	295	310	136	278	186	8	4	44	125	2							0	12	0	31	0	0	0	0	0	0
	321	377	80	217	175	9	1	17	97	7							0	0	0	64	0	0	0	0	0	0
	242	323	219	263	170	3	17	16	72	12							0	0	0	62	0	0	0	0	0	0
	193	424	215	104	371	2	20	35	65	23							0	0	0	45	0	0	0	0	0	0
	292	428	165	92	294	1	34	19	143	19							0	0	0	35	0	0	0	0	0	0
	380	489	329	96	287	0	85	4	55	5							0	0	0	20	0	0	0	0	0	0
	194	483	496	89	284	16	90	12	97	13							0	0	0	114	0	0	0	0	0	0
	270	444	525	140	280	44	158	15	52	1							0	0	0	85	0	0	0	0	0	0
	281	352	470	73	417	45	161	17	220	10							0	0	0	71	0	0	0	0	0	0
	180	351	584	46	267	52	220	18	470	4							0	0	0	71	0	0	0	0	0	0
	190	275	562	84	124	25	170	30	185	6							0	2	0	73	0	0	0	0	0	0
	139	251	583	19	67	1	185	20	338	5							0	0	0	46	0	0	0	0	0	0
	239	203	463	27	114	14	251	25	333	5							0	1	0	53	0	0	0	0	0	0
	436	233	422	33	347	44	298	5	386	4							0	0	0	51	0	0	0	0	0	0
	474	170	424	208	438	26	305	5	560	34							0	0	0	85	0	0	0	0	0	0
	424	200	291	213	403	1	350	7	590	97							0	0	0	39	0	0	0	0	0	0
	415	99	216	269	360	30	424	0	313	59							0	1	0	32	0	0	0	0	0	0
	379	96	332	142	310	49	503	0	294	86							0	0	0	11	0	7	0	0	0	0
	331	25	450	11	330	37	430	3	167	93							0	0	0	9	0	3	0	0	0	0
	522	77	245	295	288	21	445	0	260	102							0	0	0	1	0	0	0	0	0	0
	429	66	104	339	293	22	273	14	75	34							0	0	0	0	0	3	0	0	0	0
	363	40	523	236	250	18	252	14	10	24							0	0	0	0	0	3	0	0	0	0
	343	29	544	218	237	26	155	2	100	59							0	0	0	0	0	1	0	0	0	0
	394	12	606	372	310	12	255	6	150	106							0	0	0	3	0	0	0	0	0	0
	231	9	659	543	284	8	310	0	3	109							0	0	0	4	0	8	0	0	0	0
	143	9	453	528	231	5	295	3	3	139							0	0	0	2	0	12	0	0	0	0
	163	6	339	374	214	2	245	0	94	85							0	2	0	0	0	16	0	0	0	0
	142	1	186	240	195	4	363	34	139	35							0	0	0	2	0	21	0	0	0	0
	234	0	109	336	275	8	216	14	27	36							0	0	0	0	0	40	0	0	0	0
	230	0	121	168	339	14	246	9	22	49							0	0	0	1	0	3	0	0	0	0
	209	4	37	214	192	0	221	5	88	31							0	0	0	0	0	8	0	0	0	0
	153	1	104	164	284	6	170	10	12	12							0	0	0	0	0	2	0	0	0	0
	34	4	23	188	354	3	127	5	58	49							0	0	0	0	0	3	0	0	0	0
	202	8	205	366	329	6	52	2	151	27							0	0	0	0	0	0	0	0	0	0
	313	0	244	262	348	0	153	5	69	18							0	0	0	0	0	2	0	0	0	0
	195	6	327	171	456	0	123	0	106	9							0	0	0	1	0	4	0	0	0	0
	127	21	299	118	392	0	185	1	157	10							0	0	0	0	0	17	0	0	0	0
	227	32	193	118	337	0	80	1	101	17							0	0	0	0	0	11	0	0	0	0
	287	50	60	130	172	0	19	0	5	7							0	0	0	1	0	0	0	27	0	0
	348	57	129	300	201	0	58	0	5	18							0	6	0	0	0	1	0	21	1	0
	524	44	71	196	424	5	112	3	44	11							0	0	0	0	0	2	0	14	0	0
	561	54	278	189	385	0	18	7	37	8							0	0	0	0	0	0	0	15	0	0
	578	34	410	120	290	19	31	15	110	5							0	0	0	0	0	0	0	2	0	0
	432	46	212	68	294	2	35	0	59	1							0	4	0	0	0	0	0	3	0	0
	401	26	311	101	365	8	167	0	227	0							0	0	0	0	0	0	0	7	0	0
	281	20	193	244	313	0	87	0	203	41							0	1	0	0	0	1	0	10	0	0
	220	18	309	134	210	1	72	0	159	17							0	0	0	0	0	9	0	7	0	0
	177	27	114	200	257	2	42	1	136	58							0	0	0	0	0	0	0	34	0	0
	142	21	236	282	245	0	37	40	149	133							0	0	0	0	0	0	0	41	0	0
	234	32	294	292	313	3	200	62	187	61							0	0	7	0	0	0	0	13	0	0
	265	11	111	326	314	0	85	33	109	42							0	0	11	0	0	0	0	0	0	0
	255	14	172	357	253	0	32	30	134	139							0	0	1	0	0	0	0	1	0	0
	311	16	82	440	163	1	44	4	301	103							0	0	11	0	0	7	0	2	0	0
	422	8	155	369	187	1	23	3	107	80							0	13	24	0	0	12	0	0	0	0
	567	56	22	223	167	0	43	37	34	49							0	0	65	0	0	5	0	5	0	0
	493	63	274	187	189	0	136	37	6	69							0	0	79	0	0	2	0	6	0	0
	492	65	435	205	131	0	47	24	26	68							0	0	49	0	0	2	0	0	0	0
	577	13	606	85	82	0	49	41	35	44							0	0	35	0	0	1	0	0	0	0
	687	36	649	29	57	2	18	62	113	42							0	0	55	0	0	6	0	2	0	0
	608	14	648	110	111	7	75	60	9	10							0	0	71	0	0	28	0	9	0	0
	445	19	892	106	63	11	15	28	1	14							0	0	43	0	0	20	0	8	0	0
	310	18	950	192	232	1	130	13	39	13							0	0	10	0	0	10	0	13	0	0
	293	39	565	195	469	19	134	45	160	8							0	0	15	0	0	23	0	1	0	0
	204	62	498	79	618	0	153	32	292	7							0	2	13	0	0	13	0	7	0	0
	162	83	507	171	555	0	184	31	386	13							0	0	29	0	0	1	0	8	0	0
	203	118	644	110	635	7	103	24	347	25							0	0	67	0	0	0	0	18	0	0
	221	152	680	105	419	10	109	6	53	5							0	0	112	0	0	1	0	10	0	0
	133	181	816	103	338	7	106	4	78	11							0	0	99	0	0	7	0	17	0	0
	130	200	757	90	349	7	10	15	73	7							0	0	30	0	0	26	0	52	0	0
	247	222	657	54	318	5	52	45	22	3							0	6	28	0	0	27	0	31	0	0
	274	218	684	79	288	2	29	99	118	0							0	0	22	0	0	8	0	36	0	1
	201	229	677	201	252	3	174	187	141	9							0	0	88	0	0	0	0	53	0	0
	237	195	690	174	98	4	81	182	224	3							0	0	13	0	0	0	0	61	0	0
	245	170	603	58	130	2	73	156	46	3							0	0	28	0	0	0	0	39	0	0
	270	121	444	127	168	0	129	112	68	11							0	0	5	0	0	2	0	16	0	0
	302	94	331	147	242	13	79	86	75	10							0	0	39	0	0	1	0	20	0	0
	259	134	654	93	396	1	144	100	47	7							0	0	14	0	0	6	0	20	0	0
	249	165	782	127	439	1	27	106	87	1							0	2	5	0	0	0	0	7	0	0
	462	163	830	73	654	10	20	11	35	12							0	0	11	0	0	0	0	1	0	0
	458	259	620	9	775	3	159	15	94	7							0	0	0	0	0	1	0	5	0	0
	445	230	448	90	864	6	172	7	68	8							0	0	0	0	0	0	0	3	0	0
	511	172	638	57	841	15	136	4	50	6							0	0	0	0	0	0	0	2	0	0
	599	130	549	52	805	31	72	0	23	7							0	0	0	0	0	0	0	0	0	0
	582	100	679	64	697	26	21	5	33	4							0	0	5	0	0	0	0	0	0	0
	707	86	805	20	740	28	116	5	48	0							0	5	3	0	0	0	0	0	0	0
	686	52	1062	39	752	17	156	3	41	9							0	0	1	0	0	0	0	0	0	0
	657	36	1218	57	827	6	145	14	69	13							0	0	6	0	0	1	0	2	0	0
	537	31	1520	26	603	20	159	2	31	70							0	0	5	0	0	5	0	13	0	0
	644	60	1689	14	579	47	216	43	86	107							0	0	11	0	0	0	0	3	0	0
	646	70	1728	27	731	1	271	4	19	52							0	0	7	0	0	2	0	0	0	0
	246	64	1790	54	942	5	165	41	25	20							0	0	0	0	0	0	0	3	0	0
	198	36	1942	70	956	10	255	41	14	39							0	0	0	0	0	0	0	2	0	0
	109	128	1684	166	902	18	261	29	23	69							0	0	3	0	0	7	0	0	0	0
	354	90	1505	155	862	32	234	60	39	137							0	0	9	0	0	5	0	0	0	0
	447	37	1609	151	871	37	299	75	149	155							0	24	0	0	0	4	0	0	0	0
	480	57	1677	63	840	5	286	65	83	168							0	0	1	0	0	3	0	0	0	0
	447	82	1045	82	819	4	301	94	52	88							0	0	0	0	0	0	0	4	0	0
	233	82	1424	74	978	18	310	157	25	122							0	1	1	0	0	1	0	0	0	0
	280	38	1889	106	945	4	264	110	13	83							0	0	2	0	0	0	0	0	0	0
	185	70	2104	117	949	16	230	134	3	121							0	0	0	0	0	0	0	0	0	0
	324	47	1734	86	870	10	318	76	7	183							0	0	5	0	0	0	0	1	0	0
	307	22	2012	102	837	8	365	148	7	216							0	0	10	0	0	0	0	1	0	0
	265	63	2245	99	768	32	275	213	135	203							0	0	7	0	0	0	0	0	0	0
	297	17	1867	113	725	18	212	248	61	143							0	0	0	0	0	0	0	0	0	0
	344	30	1808	91	720	10	217	183	34	193							0	4	8	0	0	0	0	1	0	0
	279	17	1221	136	760	16	254	109	27	242							0	0	0	0	0	4	0	0	0	0
	263	50	1290	60	850	23	197	88	59	289							0	1	3	0	0	0	0	0	0	0
	224	7	1156	100	717	61	222	65	66	318							0	0	5	0	0	0	0	0	0	0
	90	15	1292	142	682	33	240	116	51	351							0	0	8	0	0	0	0	2	0	0
	76	29	1258	102	827	16	230	29	117	402							0	0	6	0	0	0	0	0	0	0
	95	58	941	175	710	43	188	86	28	475							0	0	30	0	0	0	0	0	0	0
	118	37	1069	79	684	49	145	110	57	536							0	0	29	0	0	0	0	1	0	0
	94	87	1141	50	541	29	122	127	64	511							0	0	9	0	0	0	0	4	0	0
	53	72	1243	36	417	72	109	157	75	401							0	1	6	0	0	0	0	0	0	0
	62	216	1127	73	445	86	321	317	71	422							0	0	14	0	0	0	0	0	0	1
	68	350	1109	51	459	68	340	191	185	434							0	0	26	0	0	0	0	0	0	0
	37	531	938	144	476	24	386	102	235	429							0	1	44	0	0	0	0	1	0	0
	40	654	1018	243	435	22	181	143	153	268							0	0	31	0	0	0	0	0	0	0
	81	481	1081	124	408	12	99	75	116	97							0	0	13	0	0	0	0	0	0	0
	33	289	948	134	405	1	166	37	177	310							0	5	19	0	0	0	0	0	0	0
	20	203	700	107	333	3	152	36	248	452							0	0	3	0	0	0	0	0	0	0
	77	288	790	281	300	7	198	58	225	360							0	0	3	0	0	0	0	0	0	0
	60	321	766	248	261	1	97	117	399	347							0	0	1	0	0	0	0	0	0	0
	108	340	656	96	251	0	80	130	404	430							0	0	3	0	0	0	0	0	0	0
	211	268	794	135	208	4	119	134	480	380							0	0	12	0	0	0	0	0	0	0
	274	385	613	60	270	0	72	52	382	470							0	0	4	0	0	0	0	0	0	0
	163	434	625	56	216	0	80	18	258	510							0	0	1	0	0	0	0	0	0	0
	97	389	567	33	196	0	62	17	268	601							0	2	4	0	0	0	0	0	0	0
	105	398	648	64	164	0	97	6	97	762							0	1	3	0	0	0	0	0	0	0
	179	358	946	26	111	26	62	3	182	700							0	0	5	0	0	0	0	0	0	0
	172	352	1086	41	12	9	20	2	91	219							0	0	9	0	0	0	0	0	0	0
	174	359	1237	86	46	64	21	15	132	255							0	0	3	0	0	0	0	0	0	0
	104	424	1397	43	56	23	9	42	216	200							0	0	2	0	0	0	0	0	0	0
	239	289	1639	111	100	7	48	23	259	268							0	0	2	0	0	0	0	0	0	0
	415	323	1923	275	126	17	3	38	568	306							0	1	0	0	0	0	0	0	0	0
	485	266	1739	275	130	0	17	6	661	101							0	0	3	0	0	0	0	0	0	0
	466	217	1669	304	152	6	1	36	602	270							0	0	0	0	0	0	0	0	0	0
	405	187	1759	155	186	5	4	23	334	255							0	0	0	0	0	0	0	0	0	0
	312	104	1512	79	95	6	2	55	460	226							0	0	1	0	0	0	0	0	0	0
	246	186	1078	32	122	0	21	122	273	210							0	0	1	0	0	0	0	0	0	0
	203	123	725	30	40	0	5	116	213	288							0	0	1	0	0	0	0	0	0	0
	15	175	464	118	126	7	4	217	116	314							0	4	2	0	0	0	0	0	0	0
	0	78	495	201	7	0	28	210	448	292							0	1	0	0	0	0	0	0	0	0
	82	69	190	157	7	4	26	275	737	224							0	0	2	0	0	0	0	0	0	0
	100	53	104	182	15	2	21	413	619	214							0	1	0	0	0	0	0	0	0	0
	271	129	213	48	2	1	112	426	546	188							0	0	0	0	0	0	0	0	0	0
	265	171	352	164	29	57	165	367	444	262							0	0	1	0	0	0	0	0	0	0
	119	178	372	206	2	152	157	373	414	262							0	0	0	0	0	0	0	0	0	0
	4	133	337	282	14	119	160	484	497	314							0	0	0	0	0	0	0	0	0	0
	58	140	326	349	13	126	192	477	435	427							0	0	1	0	0	0	0	0	0	0
	85	196	349	248	3	156	222	416	466	344							0	0	0	0	0	0	0	0	0	0
	216	195	358	180	18	206	212	488	460	214							0	0	0	0	0	0	0	0	0	0
	110	231	408	220	16	165	266	436	540	180							0	0	0	0	0	0	0	0	0	0
	282	183	454	194	12	174	369	420	358	40							0	0	0	0	0	0	0	0	0	0
	235	108	523	162	26	132	473	368	271	178							0	0	0	0	0	0	0	0	0	0
	129	117	482	294	102	176	473	315	207	209							0	0	0	0	0	0	0	0	0	0
	184	119	569	289	29	133	450	290	165	286							0	0	0	0	0	0	0	0	0	0
	266	325	666	281	160	99	327	218	187	183							0	0	0	0	0	0	0	0	0	0
	267	212	711	194	19	158	307	113	140	253							0	0	0	0	0	0	0	0	0	0
	403	205	878	102	25	219	357	105	160	287							0	0	0	0	0	0	0	0	0	0
	492	237	881	129	22	208	461	228	171	423							0	0	0	0	0	0	0	0	0	0
	581	263	1070	157	38	153	531	336	201	349							0	0	0	0	0	0	0	0	0	0
	518	207	935	195	9	167	579	174	253	363							0	1	0	0	0	0	0	0	0	0
	369	198	803	185	14	120	501	222	366	308							0	12	0	0	0	0	0	0	0	0
	481	158	943	228	84	127	327	103	487	252							0	0	0	0	0	0	0	0	0	0
	530	122	994	295	26	107	466	247	576	175							0	4	0	0	0	0	0	0	0	0
	527	125	1111	235	93	66	299	192	627	298							2	0	0	0	0	0	0	0	0	0
	611	211	832	161	25	71	71	277	595	370							0	0	19	0	0	0	0	0	0	0
	546	339	635	243	6	62	58	262	554	423							0	0	6	0	0	0	0	0	0	0
	613	259	546	161	3	41	107	170	528	407							0	0	0	4	0	0	0	0	0	0
	686	215	725	124	6	83	85	222	389	349							0	0	0	10	0	0	0	0	0	0
	544	181	885	104	18	85	77	117	163	286							0	0	0	11	0	0	0	0	0	0
	512	167	664	124	101	33	13	132	129	43							0	0	0	1	0	0	0	0	0	0
	487	200	530	229	160	69	112	126	74	235							0	0	0	0	0	0	0	0	0	0
	413	192	410	255	190	74	66	66	43	132							0	0	0	0	0	0	0	0	0	0
	292	153	1301	225	151	65	11	70	56	74							0	0	0	1	0	0	0	0	0	0
	122	138	656	230	18	93	128	19	19	73							0	0	0	0	0	0	0	0	0	0
	112	179	851	196	9	132	80	21	76	57							0	0	0	0	0	0	0	0	0	0
	117	61	649	205	71	88	77	51	138	87							0	0	0	0	0	0	0	0	0	0
	67	84	353	174	172	72	78	198	305	248							2	10	0	19	0	0	0	0	0	2
	83	12	904	136	157	47	118	519	55	330							0	51	8	56	0	0	0	0	1	0
	32	6	714	102	46	79	162	696	4	229							1	4	1	25	0	0	6	0	0	0
	96	44	633	95	1	113	244	527	9	262							9	36	0	19	0	0	0	0	0	0
	49	24	271	165	40	121	417	479	6	286							5	42	2	6	0	0	0	0	0	0
	26	89	620	205	0	50	405	504	129	339							0	57	0	2	0	0	0	0	0	0
	100	18	689	225	66	52	448	473	752	326							0	1	0	5	0	0	0	0	0	0
	37	60	830	336	5	34	546	352	1217	375							3	3	0	6	0	0	0	0	0	0
	100	18	822	409	114	59	631	390	1188	448							0	20	0	5	0	0	0	0	2	0
	170	88	825	372	56	54	511	293	1068	381							1	8	0	6	0	0	0	0	3	0
	215	41	616	295	50	119	420	241	719	424							4	20	0	0	0	0	0	0	1	0
	233	86	755	313	8	133	425	341	344	453							0	47	0	6	0	0	0	0	1	0
	252	122	698	404	25	115	347	361	334	406							5	67	0	2	0	0	0	0	4	1
	310	37	778	421	84	23	362	332	337	582							3	25	0	9	0	0	0	0	1	0
	436	135	775	463	9	148	330	300	224	560							1	0	0	0	0	0	0	0	2	0
	524	26	936	404	30	110	186	279	158	584							5	42	0	28	0	0	0	0	0	0
	585	194	1141	363	55	165	136	208	80	536							1	9	0	4	0	0	0	0	0	0
	583	205	1018	397	25	279	63	184	121	507							1	0	0	2	0	0	0	0	0	0
	358	103	1054	297	2	286	89	196	136	599							0	5	0	4	0	0	0	0	9	0
	292	78	820	406	5	238	50	82	169	584							0	21	0	2	0	0	0	0	5	0
	352	55	606	581	52	289	43	200	137	635							0	5	0	21	0	0	0	0	20	0
	357	40	627	713	110	317	32	85	244	658							1	5	0	0	0	0	0	0	1	0
	277	54	526	806	49	354	15	132	166	561							0	2	0	0	0	0	0	0	0	0
	251	49	868	897	111	363	60	87	139	515							0	12	0	1	0	0	0	0	1	0
	197	52	1104	705	100	348	183	67	83	450							0	24	0	1	0	0	0	0	1	0
	273	110	1168	493	8	442	297	136	114	216							0	7	0	0	0	0	0	0	0	0
	268	81	966	534	39	398	252	51	16	243							1	45	0	6	0	0	0	0	0	0
	191	49	1205	694	56	441	295	83	33	142							0	78	0	8	0	0	0	0	26	0
	130	51	1139	861	166	535	302	147	28	60							0	24	0	0	0	0	0	0	17	0
	83	54	796	765	212	557	372	151	70	190							1	35	0	8	0	0	0	0	1	6
	34	26	840	715	159	448	378	116	40	58							16	62	0	45	0	0	0	0	0	3
	36	21	726	782	0	484	533	103	32	52							8	130	1	1	0	3	0	0	7	0
	16	61	610	712	14	452	616	6	56	77							9	98	1	10	0	2	0	0	0	0
	40	9	701	532	3	459	603	1	105	70							14	159	0	21	0	0	0	0	2	1
	40	25	987	567	0	519	618	2	68	40							13	148	0	3	0	0	0	0	0	4
	57	26	903	447	13	663	526	9	20	11							6	101	0	0	0	0	0	0	0	119
	85	58	852	612	94	812	572	43	24	23							12	11	0	5	0	0	0	0	1	43
	103	30	652	593	57	696	502	0	4	62							13	57	0	2	0	0	0	0	0	0
	125	4	865	638	116	659	441	15	1	27							13	162	0	0	0	0	0	0	0	3
	18	21	1025	625	184	690	563	0	1	11							6	32	0	1	0	0	0	0	0	0
	86	32	973	479	61	723	558	20	1	66							7	139	0	0	0	0	0	0	0	0
	97	24	680	503	113	626	585	2	0	167							39	12	0	0	0	0	0	0	0	0
	151	44	399	322	97	685	700	15	1	474							17	53	0	0	0	0	0	0	0	3
	203	47	287	267	227	733	554	80	2	112							33	78	0	0	0	0	0	7	0	0
	200	91	214	372	155	1061	493	105	60	197							26	16	0	0	0	0	0	5	0	0
	206	81	270	355	124	1255	536	176	43	57							24	108	0	0	0	0	0	1	1	0
	138	50	267	238	194	1148	516	150	33	15							21	128	0	0	0	0	0	0	1	0
	187	138	388	205	372	960	511	151	36	81							17	190	0	0	0	0	0	3	0	0
	131	65	530	161	394	693	420	117	18	193							11	161	2	0	0	0	0	11	0	0
	129	46	534	73	262	292	409	169	5	350							0	93	0	0	0	0	0	1	0	0
	67	46	530	78	355	567	270	114	87	315							1	21	0	0	0	0	0	1	0	0
	57	61	411	102	421	759	153	98	152	316							2	12	0	0	0	0	0	0	0	0
	71	41	423	7	553	937	223	161	153	435							0	30	0	0	0	0	0	0	0	0
	152	28	362	61	508	940	162	220	84	333							2	117	0	0	0	0	0	0	0	0
	143	95	237	62	395	901	104	171	17	283							0	1	0	0	0	0	0	3	0	0
	98	80	166	80	226	479	179	216	45	350							0	43	0	0	0	0	0	23	0	0
	116	72	199	141	186	385	277	150	147	310							10	20	0	0	0	0	0	42	0	0
	252	130	254	91	178	416	362	147	197	342							66	38	0	0	0	0	0	36	0	0
	431	173	272	85	81	410	325	165	150	281							102	45	0	0	0	0	0	17	0	0
	507	120	286	53	78	416	313	199	15	286							14	116	0	0	0	0	0	1	0	0
	385	85	246	43	238	539	334	248	37	119							15	220	0	4	0	0	0	12	0	0
	255	111	162	79	111	386	281	259	54	124							7	141	2	5	0	0	0	8	0	0
	176	165	131	46	93	239	337	263	19	229							2	71	1	0	0	0	0	0	0	0
	210	181	282	97	121	197	424	265	17	170							3	135	0	13	0	0	0	2	0	0
	287	207	292	193	85	138	358	319	41	149							17	34	0	1	0	0	0	0	0	0
	326	159	185	186	73	329	277	311	25	41							21	38	0	3	0	0	0	3	0	0
	241	144	292	206	78	214	220	325	74	9							11	97	0	17	0	0	0	9	0	0
	194	125	309	166	101	137	191	290	34	116							4	29	0	16	0	0	0	6	0	0
	213	88	314	130	65	209	206	314	8	330							19	21	0	1	0	0	0	3	0	0
	203	80	290	162	92	177	219	344	75	432							34	13	0	0	0	0	0	3	0	0
	219	183	194	115	50	144	275	250	31	454							25	5	0	2	0	0	0	2	0	0
	173	197	145	151	120	194	172	309	43	466							15	20	0	3	0	0	0	0	0	0
	180	204	293	151	199	324	8	229	59	557							9	43	0	0	0	2	0	0	0	0
	91	184	419	113	339	253	239	207	78	562							13	67	0	0	0	2	0	0	0	0
	9	193	432	157	420	202	146	148	53	617							0	44	0	0	0	0	0	0	0	0
	92	279	398	166	380	92	56	122	27	762							8	5	0	4	0	0	0	5	0	0
	59	261	462	185	314	101	34	177	60	697							3	40	0	0	0	1	0	3	0	0
	120	135	477	199	239	43	174	200	57	419							6	32	0	2	0	5	0	15	0	0
	76	148	627	266	218	24	159	93	46	220							3	48	0	0	0	0	0	66	0	0
	124	170	694	341	240	90	105	71	19	86							12	33	0	0	0	4	0	35	0	0
	186	87	703	317	295	281	72	219	20	63							0	46	0	0	0	13	0	15	0	0
	272	33	654	389	342	290	41	24	36	171							1	68	0	0	0	29	0	31	0	0
	391	26	459	271	328	213	187	260	35	324							2	92	0	5	0	9	0	25	0	0
	337	12	384	299	313	116	194	244	191	256							46	63	0	1	0	4	0	6	0	0
	435	13	410	286	299	83	230	128	195	457							36	49	0	1	0	2	0	6	0	0
	378	14	246	367	205	147	155	156	121	567							44	66	0	1	0	3	0	3	0	0
	153	10	340	267	220	75	229	80	129	539							16	81	0	0	0	0	0	16	1	0
	125	18	350	366	162	93	133	65	140	239							29	48	0	0	0	2	0	21	0	0
	76	38	123	302	65	176	83	81	131	136							38	0	0	0	0	0	0	15	0	0
	353	42	117	155	30	78	9	67	213	83							7	3	0	0	0	1	0	8	0	0
	634	45	107	40	39	85	112	56	150	69							7	5	0	1	0	0	0	6	0	0
	633	147	78	80	58	69	171	38	164	38							14	3	1	7	0	0	0	4	1	0
	619	201	87	70	31	96	156	42	169	115							1	2	1	0	0	0	0	3	0	0
	604	271	142	32	13	110	318	16	313	326							0	1	0	1	0	0	0	0	1	0
	463	312	143	40	12	110	215	94	306	350							26	0	0	0	0	0	0	0	6	0
	328	275	167	15	13	92	235	185	324	366							69	0	0	1	0	1	0	17	0	0
	197	308	368	67	8	155	122	43	523	434							99	0	0	1	0	0	0	9	0	0
	109	213	560	266	46	88	75	133	505	393							6	0	0	1	0	0	0	1	0	0
	88	202	584	258	229	92	145	394	354	168							33	0	0	2	0	0	0	10	0	0
	34	76	355	308	503	135	106	259	182	32							4	0	0	0	0	0	0	1	1	0
	29	47	342	152	642	139	84	169	176	162							52	0	0	0	0	0	0	0	0	0
	13	82	375	73	629	234	82	119	142	353							111	0	0	0	0	0	0	1	0	0
	41	14	399	28	704	119	170	62	114	704							152	0	0	1	0	12	0	1	0	0
	57	37	351	30	657	203	156	84	107	726							130	0	0	0	0	18	0	4	0	0
	85	29	258	57	681	82	59	119	192	626							35	0	0	0	0	8	0	10	0	0
	42	24	174	161	364	30	64	76	268	441							24	0	0	0	0	2	0	19	0	0
	8	52	207	162	161	90	54	71	317	468							3	0	0	0	0	1	0	5	0	0
	56	116	54	242	197	159	4	31	308	308							1	0	0	0	0	0	0	6	0	0
	2	63	128	178	213	188	84	27	144	283							3	0	0	2	0	0	0	2	0	0
	10	64	31	206	99	269	44	49	46	336							0	0	0	0	0	1	0	5	0	0
	0	125	109	256	93	362	185	131	31	303							0	0	0	0	0	0	0	2	0	0
	1	132	74	207	102	363	95	309	43	251							5	0	0	0	0	0	0	0	0	0
	2	47	50	308	167	252	3	290	2	220							24	0	0	0	0	0	0	1	0	0
	5	14	303	258	194	260	14	126	90	94							29	0	0	0	0	0	0	0	0	0
	4	30	661	314	238	221	69	172	58	69							17	0	0	0	0	0	0	3	0	0
	46	69	1071	288	297	280	25	58	10	151							20	0	0	0	0	0	0	9	0	0
	132	115	981	258	242	367	55	7	60	230							40	0	0	0	0	0	0	0	0	0
	183	180	777	211	111	214	24	25	24	256							29	0	0	0	0	0	0	0	0	0
	88	141	664	268	66	210	77	50	37	257							2	0	0	0	0	0	0	0	1	0
	45	148	593	254	35	353	100	62	44	236							5	0	0	0	0	0	0	0	0	0
	16	85	513	237	15	402	70	14	15	230							2	0	0	0	0	0	0	11	0	0
	33	153	373	422	103	467	131	6	18	145							10	0	1	4	0	0	0	1	0	0
	27	192	303	461	21	506	109	1	0	118							14	0	1	0	0	0	0	0	4	0
	3	251	142	421	20	547	8	121	0	118							4	0	0	14	0	0	0	12	0	0
	0	251	22	365	43	491	56	293	46	220							4	0	0	0	0	0	0	52	0	0
	1	195	109	399	28	528	32	390	265	160							1	0	0	2	0	0	0	73	0	0
	2	104	156	536	129	432	58	341	109	310							3	0	0	2	1	0	0	73	0	0
	1	171	163	523	105	299	107	289	51	447							1	0	0	4	0	0	0	56	1	0
	85	214	186	354	110	218	92	394	53	286							11	0	0	2	0	0	0	25	0	0
	139	256	202	240	102	272	0	266	42	368							17	0	0	0	0	0	0	38	0	0
	170	321	192	176	126	247	29	177	43	384							40	0	0	11	0	0	0	51	0	0
	165	332	180	249	149	203	237	106	140	422							143	0	0	0	0	0	2	24	5	0
	102	402	191	199	73	145	247	101	122	461							58	0	0	0	0	0	0	15	2	0
	96	325	221	187	47	143	269	213	182	308							1	0	0	0	1	0	0	9	0	0
	127	323	295	117	113	72	334	263	251	132							35	0	0	0	0	0	0	8	0	0
	122	315	320	84	91	162	351	258	297	347							32	0	0	0	0	0	0	11	0	0
	283	487	352	93	117	197	395	230	417	338							10	0	0	1	0	0	0	1	0	0
	365	417	400	14	74	238	383	223	336	523							3	0	0	0	0	0	0	5	1	0
	302	375	408	38	108	268	410	226	404	602							12	0	0	0	0	0	0	17	0	0
	280	212	439	230	187	183	477	179	415	258							30	0	0	0	0	0	0	4	0	0
	173	142	435	185	209	142	477	260	304	448							27	0	0	2	0	0	0	0	0	0
	184	89	486	365	132	104	646	360	293	197							20	0	0	0	0	0	0	7	1	0
	210	75	554	342	110	115	469	226	362	637							0	0	0	1	0	0	0	8	3	0
	177	74	599	258	59	224	472	271	255	539							1	0	0	0	0	0	0	7	0	0
	164	48	603	356	43	311	475	218	139	527							0	0	0	0	0	0	0	0	0	0
	101	83	565	373	73	417	608	157	196	676							3	0	0	0	0	0	0	0	0	0
	145	90	284	373	233	422	523	187	337	667							1	0	0	0	0	0	0	7	0	0
	331	67	134	353	75	317	245	375	268	486							0	0	0	0	0	0	0	0	42	0
	395	32	69	410	98	203	190	277	189	337							0	0	0	0	0	0	0	0	0	0
	403	33	157	473	40	107	107	461	99	306							0	0	0	0	0	0	0	0	0	0
	316	30	80	491	49	28	65	295	70	321							0	0	0	1	0	0	0	0	5	0
	309	130	54	582	95	38	66	239	64	472							0	0	0	0	0	0	0	0	14	0
	467	154	29	567	79	90	31	105	10	547							4	0	0	0	0	0	0	0	15	0
	447	183	33	527	0	142	32	217	4	448							0	0	0	3	0	0	0	0	53	0
	250	186	68	450	8	182	209	292	92	459							0	0	0	2	0	0	0	0	107	0
	319	164	107	346	18	207	194	266	209	629							4	0	0	0	0	0	0	0	8	0
	302	181	221	314	12	236	219	352	196	598							0	0	0	4	0	0	0	0	57	0
	340	133	317	245	20	184	327	200	342	596							0	0	0	0	1	0	0	0	11	0
	298	125	230	256	25	149	263	223	507	681							0	0	0	1	0	0	0	0	14	0
	365	224	278	182	1	98	319	127	627	538							0	0	0	0	0	0	2	0	0	0
	375	196	346	366	4	56	469	127	654	439							8	0	0	0	0	0	0	0	17	0
	315	192	302	217	0	44	392	210	706	366							1	0	0	0	1	0	0	0	8	1
	342	160	175	211	19	76	191	106	627	245							0	0	0	1	4	0	0	0	20	0
	252	188	177	152	92	187	250	141	459	50							2	0	0	0	0	0	0	0	16	0
	331	196	197	246	86	204	347	88	518	112							0	0	0	0	0	0	0	0	17	0
	278	132	298	356	9	196	463	42	620	230							1	0	0	0	1	0	0	0	0	1
	317	180	206	363	7	192	349	111	575	309							0	0	0	5	0	0	0	0	3	0
	281	200	137	500	41	138	354	27	740	273							8	0	0	0	0	0	0	0	27	0
	247	197	61	536	55	77	427	147	709	91							4	0	0	1	0	0	0	0	23	0
	313	313	26	689	32	74	258	142	450	71							1	0	0	0	0	0	0	5	130	0
	274	401	362	724	41	37	305	88	166	78							1	0	0	0	0	0	0	0	35	0
	140	387	669	767	69	33	348	179	201	187							1	0	0	0	0	0	0	0	31	0
	206	520	551	655	123	39	375	24	155	131							0	0	0	0	3	0	0	0	9	0
	145	453	533	489	69	32	359	44	40	293							1	0	0	0	3	0	0	0	87	0
	143	377	609	426	16	77	274	61	57	220							12	0	0	0	1	0	0	0	42	0
	197	320	663	371	42	76	148	89	41	288							4	0	0	0	6	0	0	0	23	0
	62	332	624	310	92	73	38	114	48	297							1	0	0	0	0	0	0	0	110	0
	185	291	493	131	109	67	137	101	112	269							1	0	0	0	2	0	0	0	19	0
	182	265	271	54	293	37	26	24	284	229							0	0	0	0	6	0	0	0	93	0
	302	288	182	150	295	63	21	77	392	115							0	0	0	0	33	0	0	0	18	0
	323	408	205	128	286	93	47	86	586	53							15	1	0	1	33	0	0	0	58	0
	298	361	251	82	182	40	17	213	598	56							1	0	0	8	31	0	0	0	150	0
	277	369	363	93	154	39	122	263	585	26							0	0	0	0	12	0	0	0	148	0
	192	379	365	87	118	30	80	107	724	159							0	7	0	4	71	0	0	0	133	0
	316	359	410	81	85	95	72	153	744	199							0	11	0	2	149	0	0	0	66	0
	443	400	524	173	114	83	349	315	752	93							2	1	0	0	73	0	0	0	30	0
	488	251	488	168	90	91	291	205	731	224							0	0	0	14	39	0	0	0	23	0
	466	299	692	213	98	59	335	177	595	281							0	9	0	3	87	0	0	0	24	0
	524	272	823	92	126	102	298	110	732	281							0	17	0	0	85	0	0	0	21	0
	583	359	914	139	352	30	100	96	657	355							0	0	0	3	36	0	0	0	37	0
	620	261	882	81	237	50	94	90	556	228							2	1	0	0	0	0	0	1	99	0
	667	291	797	161	286	12	238	80	580	110							2	2	0	5	12	0	0	1	230	0
	649	431	711	104	377	25	227	90	558	39							5	3	0	0	14	0	0	0	55	0
	479	483	821	118	406	169	212	18	569	100							0	0	0	0	17	0	0	0	97	0
	435	537	881	138	549	311	182	145	355	278							0	0	0	0	45	0	0	0	73	0
	371	542	919	218	661	252	99	67	261	305							0	0	0	0	37	0	0	0	94	0
	304	340	788	232	535	257	101	351	237	266							0	0	0	0	15	0	0	0	27	0
	359	411	954	301	626	266	56	219	185	230							0	0	0	2	58	0	0	0	198	0
	458	330	981	282	596	225	211	203	340	54							6	0	0	0	62	0	0	0	113	0
	432	360	1056	189	513	232	128	128	471	102							5	1	0	1	21	0	0	0	10	0
	396	388	965	252	683	255	164	68	517	149							4	0	0	0	32	0	0	0	19	0
	379	468	815	276	606	174	224	71	462	185							0	0	0	0	44	0	0	0	7	0
	324	416	786	177	695	91	47	53	328	74							2	0	0	0	55	0	0	0	10	0
	323	365	504	110	678	34	168	131	243	64							2	0	0	0	27	0	0	0	36	0
	299	194	378	191	811	28	126	172	309	2							0	0	0	0	46	0	0	0	70	0
	146	166	435	146	730	21	222	112	245	34							0	0	0	0	74	0	0	0	118	0
	194	64	462	132	618	31	244	102	297	188							0	0	0	0	40	0	0	0	168	0
	114	58	478	139	591	57	69	95	263	362							0	0	0	0	36	0	0	0	78	0
	35	61	390	99	604	52	153	103	67	432							0	0	0	0	33	0	0	0	0	0
	158	249	132	111	571	26	71	95	15	476							0	0	0	2	27	0	0	0	0	0
	138	292	121	45	504	5	91	79	17	313							0	4	0	0	71	0	0	0	0	0
	186	298	283	133	575	8	164	55	25	326							1	2	1	4	68	0	0	0	0	0
	270	358	375	83	733	7	142	51	191	425							0	0	3	1	51	0	0	0	7	0
	446	359	303	231	759	52	121	226	209	388							0	3	0	17	110	0	0	0	1	0
	470	212	369	152	918	228	113	205	89	412							1	8	0	1	199	0	0	0	0	0
	407	235	320	95	864	394	30	86	117	358							0	20	0	5	217	0	0	0	0	0
	274	183	240	38	916	455	91	127	76	384							0	12	0	4	113	0	0	0	1	0
	304	228	102	21	1020	399	128	153	289	340							0	1	0	3	197	0	0	0	2	0
	273	178	160	211	911	252	90	139	276	300							0	1	0	0	306	0	0	0	0	0
	148	168	301	279	913	212	129	128	216	279							0	0	0	0	393	0	0	0	0	0
	217	145	308	216	917	222	54	152	76	322							0	0	0	0	246	0	0	0	0	0
	238	70	421	320	869	132	132	229	45	327							0	0	0	15	129	0	0	0	0	0
	269	44	433	519	682	46	135	256	16	244							0	0	0	10	33	0	0	0	4	0
	440	74	426	574	741	40	60	329	86	188							0	0	0	16	117	0	0	0	0	0
	363	95	380	575	792	25	8	334	79	185							0	0	0	2	138	0	0	0	0	0
	315	84	295	543	816	12	129	270	20	186							0	0	0	2	48	0	0	0	0	0
	238	135	170	647	910	7	125	324	10	229							0	0	0	11	70	0	0	0	0	0
	120	378	157	684	825	13	7	378	23	276							0	0	0	13	18	0	0	0	0	0
	30	374	101	723	815	11	62	407	3	259							0	0	0	30	75	0	0	0	0	0
	103	372	215	608	867	27	230	540	41	381							0	0	0	1	39	0	0	0	0	0
	125	377	310	682	889	82	320	453	16	436							0	0	0	19	8	0	0	0	0	0
	37	428	465	645	751	65	212	618	16	476							0	0	0	4	49	0	0	0	0	0
	34	509	565	369	866	58	79	475	0	301							0	0	0	9	28	0	0	0	0	0
	9	547	528	579	854	38	351	397	20	200							0	0	0	28	33	0	0	0	0	0
	5	496	506	400	734	77	332	322	8	231							0	0	0	74	16	0	0	0	0	0
	60	488	428	391	1005	139	185	319	30	408							0	0	0	8	12	0	0	0	0	0
	23	514	468	378	1082	135	196	361	3	336							0	0	0	7	26	0	0	0	0	0
	33	591	587	324	1130	79	168	433	17	419							0	0	0	26	0	0	0	0	0	0
	14	611	453	451	1244	17	89	476	20	606							0	0	0	117	12	0	0	0	0	0
	31	586	400	375	1271	32	167	520	20	549							0	0	0	39	3	0	0	0	0	0
	52	680	572	540	1040	81	159	581	2	533							1	0	0	94	1	0	0	0	0	0
	8	760	290	292	1054	33	124	402	11	408							2	0	0	18	9	0	0	0	0	0
	22	847	295	120	1013	118	80	265	8	394							0	0	0	98	7	0	0	0	0	0
	48	1000	172	265	960	49	121	305	72	391							0	2	0	82	19	0	0	0	0	0
	54	773	88	233	695	126	86	352	22	389							0	7	0	9	98	0	0	0	0	0
	25	1066	119	149	543	40	149	167	33	322							3	13	0	2	288	0	0	0	0	0
	8	970	172	88	557	90	112	184	7	239							0	0	0	4	291	0	0	0	0	0
	19	886	194	61	705	110	258	72	11	252							2	1	0	8	131	0	0	0	0	0
	12	666	129	28	710	74	259	1	28	350							0	0	0	83	295	0	0	0	0	0
	0	692	161	12	688	36	260	31	4	439							0	0	0	82	481	0	0	0	0	0
	18	638	352	172	748	80	375	101	43	761							0	0	0	5	494	0	0	0	0	0
	18	658	337	52	403	43	331	54	26	576							0	1	0	220	435	0	0	0	0	0
	6	534	227	88	410	49	347	96	28	410							0	0	0	62	395	0	0	0	0	0
	40	249	228	128	168	60	521	182	15	329							0	0	0	41	460	0	0	0	0	0
	2	229	334	181	355	60	371	157	120	226							0	0	0	31	410	0	0	0	0	0
	1	395	371	45	346	90	549	290	202	330							0	0	0	120	339	0	0	0	0	0
	3	316	495	21	601	68	504	216	195	420							0	0	0	113	363	0	0	0	0	0
	5	181	639	24	788	116	289	280	198	397							0	0	0	196	363	0	0	0	0	0
	3	126	522	46	534	166	255	227	193	349							0	0	0	223	479	0	0	0	0	0
	45	13	401	249	339	147	301	401	273	579							0	0	0	227	575	0	0	0	0	0
	26	31	378	269	380	145	258	652	292	601							0	0	0	220	659	0	0	0	0	0
	3	72	623	131	221	137	345	549	286	446							0	0	0	85	385	0	0	0	0	0
	40	57	494	156	170	111	198	453	307	445							0	0	0	257	349	0	0	0	0	0
	19	23	387	208	84	163	223	397	261	453							0	0	0	201	541	0	0	0	0	0
	0	120	366	158	137	63	140	456	451	731							0	0	0	14	326	0	0	0	0	0
	0	93	411	381	200	99	189	590	564	674							0	0	0	119	329	0	0	0	0	0
	41	52	517	323	355	179	219	641	534	685							0	0	0	2	324	0	0	0	0	0
	28	73	534	214	250	216	83	426	418	631							0	0	0	17	291	0	0	0	0	0
	61	117	401	260	140	273	187	377	249	590							0	0	0	74	327	0	0	0	0	0
	83	87	217	250	189	317	120	421	78	578							0	0	0	113	291	0	0	0	0	0
	130	59	410	221	82	326	167	338	211	564							0	0	0	10	339	0	0	0	0	0
	135	62	441	259	185	336	128	289	248	429							0	0	0	128	271	0	0	0	0	0
	184	75	363	259	271	242	140	302	407	508							0	0	0	37	133	0	0	0	0	0
	80	98	413	183	235	312	59	319	448	497							0	0	0	180	92	0	0	0	0	0
	122	230	627	195	184	225	76	353	389	445							0	0	0	69	171	0	0	0	0	0
	59	114	585	244	58	216	53	391	367	399							0	0	0	43	201	0	0	0	0	0
	57	93	679	238	54	332	130	399	298	455							0	0	0	156	241	0	0	0	0	0
	11	34	723	458	336	310	130	342	146	375							0	0	0	5	329	0	0	0	0	0
	16	112	683	432	344	418	137	419	54	500							0	0	0	2	477	0	0	0	0	0
	35	80	681	439	285	411	118	372	75	540							0	0	0	20	454	0	0	0	0	0
	136	50	679	373	313	430	127	223	32	499							0	0	0	77	340	0	0	0	0	0
	155	84	688	267	386	421	153	126	31	359							0	0	0	141	185	0	0	0	0	0
	89	67	605	190	170	389	118	149	25	441							0	0	0	205	89	0	0	0	0	0
	104	52	460	143	212	310	86	155	40	420							0	0	0	242	36	0	0	0	0	0
	140	81	251	365	306	361	162	198	12	431							0	0	0	173	38	0	0	0	0	0
	42	22	397	510	523	289	102	211	30	526							0	0	0	186	21	0	0	0	0	0
	78	45	211	503	667	282	22	215	60	473							0	8	0	168	8	0	0	0	0	0
	40	43	201	494	735	222	84	182	57	427							0	8	0	125	4	25	0	0	0	0
	208	118	172	299	682	236	43	148	25	499							0	3	0	261	16	11	0	0	0	0
	188	66	282	232	554	303	60	147	44	492							8	45	0	340	6	9	0	0	0	0
	86	206	142	322	705	294	50	169	34	614							0	66	0	616	47	1	0	0	0	0
	249	215	253	315	582	295	128	176	157	500							0	17	1	340	68	1	0	0	0	0
	220	101	207	229	566	230	10	199	251	332							0	68	1	394	55	0	0	0	0	0
	381	127	425	251	506	199	94	197	312	497							1	82	1	650	34	0	0	0	0	0
	271	76	411	156	566	265	172	182	427	513							1	56	2	875	24	5	0	0	0	0
	200	263	544	235	621	104	155	143	514	480							1	20	1	526	59	0	0	0	0	0
	187	218	665	214	632	160	313	31	490	363							3	77	2	524	50	5	0	0	0	0
	183	295	478	268	645	165	395	88	477	586							0	51	0	239	82	45	0	0	0	0
	191	280	271	192	675	124	374	93	493	453							2	36	0	166	127	27	0	2	0	0
	200	396	220	101	445	150	377	0	429	497							4	45	0	90	58	7	0	2	0	0
	179	445	284	103	408	146	238	112	272	506							0	27	0	405	63	4	0	0	0	0
	173	544	277	55	900	149	242	62	319	625							2	63	0	360	59	15	0	0	0	0
	164	326	293	3	1065	91	187	58	194	596							7	106	0	79	17	24	0	0	0	0
	116	158	461	71	906	60	122	124	117	506							26	81	0	99	8	15	0	0	0	0
	208	109	388	101	1215	41	171	64	172	366							8	103	0	118	8	6	0	0	0	0
	135	72	320	79	1339	43	271	128	258	565							2	92	0	80	9	7	0	0	0	0
	109	45	253	1	1298	22	463	121	172	604							6	45	0	58	18	1	0	1	0	0
	84	330	167	24	1279	41	271	18	115	573							14	45	0	55	16	3	0	1	0	0
	78	281	145	76	1131	37	376	61	55	352							11	26	0	56	16	0	0	1	0	0
	72	258	99	115	1014	10	427	66	110	428							20	87	0	33	19	2	0	0	0	0
	135	252	117	128	1027	5	400	43	132	321							21	7	0	72	26	1	0	0	0	0
	125	208	15	171	815	25	397	49	53	286							12	46	0	78	20	0	0	2	0	0
	231	122	151	147	683	24	310	10	21	383							0	82	0	0	48	0	0	0	0	0
	287	233	94	250	791	0	94	64	37	621							2	34	0	49	30	1	0	0	0	0
	383	235	171	182	559	37	80	18	14	495							0	50	0	3	57	4	0	0	0	0
	370	75	155	212	526	14	230	3	32	420							5	47	0	43	41	5	0	0	0	0
	454	187	132	253	409	10	480	10	63	695							19	20	0	86	23	9	0	1	0	0
	469	138	475	340	453	36	553	30	0	567							33	213	0	32	52	31	0	0	0	0
	581	100	636	324	229	24	722	4	20	694							51	92	0	46	41	30	0	10	0	0
	372	55	564	362	356	7	832	38	41	657							10	209	8	15	61	36	0	11	0	0
	364	337	580	358	447	0	759	44	42	832							13	252	47	76	39	34	0	10	0	0
	253	38	570	441	517	2	753	48	56	647							11	153	36	54	14	40	0	33	0	0
	231	300	699	452	306	3	626	17	1	726							5	104	21	39	12	8	0	0	0	0
	184	345	722	484	165	3	619	26	7	522							20	98	21	87	39	13	0	2	0	0
	180	186	934	424	78	13	706	51	18	337							16	221	40	53	47	22	0	2	0	0
	100	217	877	293	175	0	728	49	0	639							52	184	44	136	18	18	0	3	0	0
	104	255	885	61	695	0	700	53	50	559							50	232	28	106	7	10	0	17	0	0
	128	184	834	102	837	15	765	8	138	569							51	259	2	96	13	1	0	13	0	0
	86	199	724	185	1087	58	700	0	131	383							46	32	70	170	21	3	0	6	0	0
	149	218	681	262	1046	46	750	25	41	479							32	90	113	489	1	6	0	3	0	0
	89	149	749	228	829	48	453	6	43	391							29	216	89	291	3	0	0	10	0	0
	117	265	808	12	739	25	321	26	115	291							5	91	145	52	3	2	0	8	0	0
	127	40	726	135	674	21	467	12	23	374							2	288	39	40	3	6	0	23	0	0
	52	145	805	13	544	28	858	51	25	327							1	220	30	33	0	1	0	23	0	0
	84	97	642	35	393	13	842	19	40	287							1	6	21	6	0	1	0	0	0	0
	175	83	682	71	481	16	901	23	82	355							3	63	0	11	1	4	0	2	0	0
	165	227	674	76	428	33	882	17	160	358							4	28	1	4	5	1	0	3	0	0
	260	234	584	202	370	80	725	13	60	461							1	106	9	1	62	2	0	2	0	0
	223	35	442	161	212	84	527	48	79	379							0	111	0	1	47	0	0	0	0	0
	182	172	254	53	158	120	652	68	246	63							0	33	1	1	12	0	0	0	0	0
	205	97	375	55	123	115	697	61	44	217							0	339	0	4	7	0	0	5	0	0
	161	256	436	7	76	56	469	96	86	35							0	139	6	3	1	2	0	5	0	0
	132	181	489	23	251	28	610	84	77	63							1	242	5	1	5	1	0	1	0	0
	134	228	371	103	244	28	621	32	53	92							128	238	14	1	7	1	0	4	0	0
	137	266	242	128	671	83	449	7	20	71							161	23	32	5	23	7	0	12	0	0
	163	340	60	276	1459	161	262	132	28	75							126	121	25	11	5	5	0	6	0	0
	159	231	178	432	2024	204	240	11	105	231							53	85	13	267	6	1	0	12	0	0
	112	103	523	626	2233	181	587	136	43	168							62	70	5	299	19	18	0	53	0	0
	13	217	1163	599	1918	62	472	34	27	172							26	40	115	50	46	5	0	1	0	0
	29	240	1275	477	1423	49	320	104	48	306							81	226	308	143	3	4	0	3	0	0
	157	176	1792	421	1242	67	574	25	82	334							25	274	403	49	13	2	0	0	0	0
	130	206	1630	460	1220	53	583	157	94	197							235	239	508	131	101	5	0	9	0	0
	140	66	1271	210	881	80	770	166	188	98							213	109	116	42	29	14	0	3	0	0
	143	26	1131	177	796	55	1108	8	89	134							98	85	38	70	68	9	0	2	0	0
	35	157	885	120	879	37	1152	120	48	167							54	134	46	167	63	4	0	10	0	1
	56	131	761	284	800	31	990	35	89	250							171	372	86	189	8	9	0	3	0	1
	129	203	353	273	590	49	953	147	96	380							224	225	95	67	12	0	0	19	0	0
	152	261	236	211	397	93	794	43	23	295							153	143	109	156	0	0	0	7	0	0
	65	103	219	218	360	123	419	97	67	307							135	76	67	113	0	3	0	60	0	0
	124	36	310	247	251	64	92	30	126	293							31	171	46	76	1	5	0	52	0	0
	146	195	380	264	276	59	80	11	180	467							102	109	25	96	9	2	0	31	0	0
	107	171	282	123	375	5	109	13	53	423							11	38	25	12	12	0	0	20	0	0
	41	27	400	221	265	38	132	25	96	224							17	37	87	11	25	0	0	4	0	0
	97	72	333	166	220	70	329	72	20	184							37	77	19	32	8	7	0	1	0	0
	171	277	238	223	323	117	314	33	46	132							50	71	42	5	7	1	0	2	0	0
	133	332	215	249	298	83	330	67	175	248							40	67	53	3	11	0	0	1	0	0
	79	442	157	133	234	48	438	34	293	218							8	299	31	2	9	0	0	0	0	0
	9	457	100	146	252	52	489	91	345	156							18	267	95	2	5	0	0	4	0	0
	8	540	156	151	321	13	486	70	304	77							66	354	109	4	2	0	0	20	0	0
	1	562	142	129	280	2	506	95	313	110							77	175	47	0	0	0	0	0	0	0
	32	431	244	128	171	11	534	122	256	32							45	239	14	3	0	0	0	1	0	0
	1	380	102	179	77	28	587	25	232	44							25	213	5	3	0	0	0	0	0	0
	9	419	159	164	119	46	817	123	160	106							107	230	38	1	7	0	0	9	0	0
	48	415	141	242	65	40	753	100	104	162							8	222	35	1	2	0	0	0	0	0
	78	842	173	148	81	85	599	53	110	44							76	286	4	1	7	0	0	0	0	0
	124	901	108	259	184	114	699	8	164	111							47	324	0	0	9	0	0	0	0	0
	14	710	156	268	50	94	621	79	96	178							53	248	40	1	16	0	0	1	0	0
	51	659	103	262	137	153	863	117	116	125							50	372	13	8	6	0	0	7	0	0
	36	804	75	96	124	238	740	88	91	281							116	518	75	2	3	1	0	2	0	0
	47	837	71	217	78	201	599	72	161	216							131	558	15	2	16	0	0	3	0	0
	64	690	110	128	9	161	645	21	146	280							82	517	36	3	3	0	0	50	0	0
	108	660	96	70	72	214	576	55	157	262							40	624	71	2	4	0	0	20	0	0
	53	543	122	80	58	243	611	97	183	231							33	600	158	1	0	0	0	4	0	0
	5	631	63	61	195	191	625	100	82	171							36	440	68	0	0	0	0	0	0	0
	34	846	131	29	196	350	446	104	27	101							45	393	21	0	4	0	0	32	0	0
	33	530	449	8	434	286	350	47	15	126							40	263	4	2	30	0	0	17	0	0
	31	367	441	44	292	272	471	66	103	94							61	234	4	4	19	0	0	0	0	0
	58	352	327	11	232	278	292	20	21	53							20	280	39	0	22	0	0	0	0	0
	14	480	155	73	85	261	497	31	29	65							121	462	29	0	50	0	0	0	0	0
	139	544	73	50	214	176	660	19	71	25							151	419	35	0	26	0	0	13	0	0
	105	585	81	28	137	96	836	66	141	42							49	288	17	0	10	0	0	3	0	0
	89	414	69	22	257	66	389	25	89	63							56	365	6	0	33	0	0	1	0	0
	111	555	203	19	268	30	597	41	79	88							32	251	8	0	48	0	0	1	0	0
	120	573	204	0	130	14	550	44	117	121							76	116	4	0	121	0	0	0	0	0
	161	284	261	9	88	59	535	8	176	192							88	92	0	0	14	0	0	12	0	0
	174	218	319	27	72	46	534	18	234	115							94	48	4	0	34	0	0	0	0	0
	290	280	276	14	167	3	780	68	296	50							61	56	19	0	12	0	0	1	0	0
	111	380	278	30	40	0	777	24	400	57							64	36	2	0	2	0	0	0	0	0
	171	580	352	43	105	3	749	34	475	21							69	41	2	0	22	0	0	0	0	0
	150	798	317	38	105	123	739	111	440	72							34	67	2	0	17	0	0	0	0	0
	70	860	347	44	150	64	656	36	434	74							15	98	0	0	7	0	0	0	0	0
	212	854	406	32	175	148	609	37	310	11							15	104	0	0	15	0	0	0	0	0
	332	1035	633	7	148	256	475	114	319	44							57	76	1	0	1	0	0	0	0	0
	169	941	810	31	151	302	48	47	411	87							60	48	0	0	13	0	0	0	0	0
	200	650	978	4	441	287	185	6	426	63							51	59	1	0	31	0	0	1	0	0
	136	506	986	11	244	252	315	45	365	39							58	101	0	0	12	0	0	0	0	0
	100	591	1286	65	225	184	385	1	227	52							51	106	0	0	21	0	0	0	0	0
	100	405	1389	23	130	105	424	0	403	62							74	60	0	3	12	0	0	4	0	0
	18	749	1503	10	231	77	278	5	459	133							64	140	16	0	10	0	0	2	0	0
	20	307	1297	50	124	53	175	19	630	133							19	220	1	3	9	0	0	0	0	0
	114	424	980	22	148	41	260	12	628	6							32	173	5	0	0	0	0	0	0	0
	53	339	1103	4	315	93	503	142	496	109							25	310	10	1	12	0	0	15	0	0
	51	419	1123	84	352	105	551	169	655	40							41	195	20	0	13	0	0	18	0	0
	73	691	1228	3	367	105	641	95	556	154							11	315	9	1	15	0	0	7	0	0
	53	922	1167	56	291	124	685	27	276	184							20	351	19	0	10	0	0	9	0	0
	39	1269	1149	2	329	155	521	87	108	159							40	317	45	1	3	0	0	5	0	0
	126	1276	1223	22	217	98	521	110	65	35							46	184	25	0	9	0	0	1	0	0
	32	1337	998	23	147	19	557	10	54	11							10	331	14	0	21	0	0	0	0	0
	147	1370	840	103	88	4	714	104	80	14							22	361	10	0	11	0	0	8	0	0
	60	1031	698	114	85	14	793	2	150	50							8	379	6	0	5	0	0	6	0	0
	37	809	775	181	159	14	679	15	246	76							7	463	3	1	5	0	0	3	0	0
	107	727	622	291	238	17	618	11	359	10							6	401	8	1	24	0	0	1	0	0
	106	706	464	265	340	27	489	26	398	92							1	332	0	1	9	0	0	1	0	0
	153	629	355	213	433	47	565	64	282	6							11	360	1	1	12	0	0	0	0	0
	163	379	468	220	293	36	549	53	324	58							5	315	2	1	21	0	0	2	0	0
	208	259	347	271	279	44	662	170	181	19							6	478	1	1	6	0	0	0	0	0
	136	360	170	260	185	40	318	97	159	71							0	302	2	0	3	0	0	1	0	0
	107	483	132	232	309	31	441	151	172	1							3	381	0	0	0	0	0	0	0	0
	64	582	10	146	441	4	570	92	232	23							1	233	0	0	2	0	0	0	0	0
	6	715	16	249	416	0	580	66	184	2							0	271	0	0	5	0	0	0	0	0
	24	685	167	276	197	5	501	87	61	1							2	330	0	0	6	0	0	0	0	0
	17	754	218	162	125	11	397	135	240	49							0	454	0	0	45	0	0	0	0	0
	0	586	327	113	177	38	484	242	226	47							0	623	0	0	71	0	0	0	0	0
	14	633	286	41	172	15	316	192	117	56							6	522	0	0	62	0	0	0	0	0
	23	561	184	108	68	5	377	112	85	61							6	417	0	0	35	0	0	0	0	0
	15	488	289	171	58	1	373	194	71	26							3	472	0	0	17	0	0	0	0	0
	47	520	381	152	80	6	313	198	36	12							6	608	0	0	24	0	0	0	0	0
	66	603	514	283	141	228	307	127	31	0							0	543	0	12	47	0	0	2	0	0
	153	686	518	388	148	284	580	157	77	104							2	498	0	4	109	0	0	1	0	0
	69	756	634	357	10	337	495	248	120	110							11	393	0	0	89	0	0	1	0	0
	37	763	535	210	75	383	478	224	93	105							15	488	1	29	56	0	0	0	0	0
	72	761	407	263	89	283	439	198	73	35							8	415	0	10	56	0	0	0	0	0
	11	668	317	201	44	243	436	172	74	69							6	281	0	24	37	0	0	0	0	0
	24	602	288	153	49	240	461	174	83	55							2	360	1	0	45	0	0	0	0	0
	61	464	259	51	43	262	562	223	95	52							0	615	0	4	44	0	0	80	0	0
	80	409	316	37	69	165	468	258	32	72							1	331	1	0	33	0	0	63	0	0
	42	326	238	21	28	101	308	172	62	77							4	158	3	5	29	0	0	28	0	0
	31	473	106	0	47	45	351	158	63	83							5	337	1	0	79	0	0	45	0	0
	48	404	209	2	111	16	340	132	33	81							2	488	0	0	85	0	0	53	0	0
	16	301	262	8	18	9	359	131	33	35							2	345	0	0	158	0	0	51	0	0
	3	192	217	0	33	4	415	263	46	48							3	377	0	1	89	0	0	31	0	0
	43	116	181	1	179	2	419	90	67	72							0	209	0	0	192	0	0	42	0	0
	0	54	159	7	266	13	440	237	7	45							1	142	0	0	42	0	0	16	0	0
	4	81	204	3	242	17	329	136	9	10							0	134	0	0	124	0	0	9	0	0
	10	118	168	2	367	5	195	198	3	73							8	141	0	0	4	0	0	5	0	0
	40	128	169	0	385	8	190	266	7	49							0	287	0	0	40	0	0	1	0	0
	3	165	214	0	340	4	161	243	5	14							3	202	0	0	51	0	0	16	0	0
	75	194	317	3	283	1	142	183	1	50							2	248	0	0	266	0	0	5	0	0
	80	54	237	0	197	4	239	195	5	39							0	178	0	1	249	0	0	18	0	0
	235	54	245	0	142	0	263	271	0	2							0	323	0	0	67	0	0	21	0	0
	118	11	482	0	271	0	245	281	1	46							2	278	0	0	72	0	0	11	0	0
	49	23	581	0	243	0	299	188	4	39							2	212	0	0	64	0	0	7	0	0
	67	34	551	0	270	2	310	49	7	19							5	410	0	0	197	0	0	0	0	0
	109	27	589	1	281	0	179	71	0	27							1	538	0	0	192	0	0	1	0	0
	80	4	525	0	262	2	98	67	0	21							4	411	0	0	35	0	0	4	0	0
	58	70	639	2	350	5	258	98	19	17							0	390	0	0	6	0	0	0	0	0
	1	252	734	0	166	5	266	136	30	11							5	459	0	0	48	0	0	2	0	0
	2	301	555	1	135	10	294	233	19	72							1	441	0	1	41	0	0	0	0	0
	9	288	406	0	71	4	305	366	36	98							11	443	0	0	68	0	0	25	0	0
	3	223	232	0	373	5	296	519	20	90							5	728	0	0	44	0	0	30	0	0
	22	193	297	0	304	6	355	663	5	60							6	738	1	3	106	0	0	3	0	0
	119	226	467	0	474	0	320	646	12	18							4	556	0	7	137	0	0	0	0	0
	367	265	481	0	393	5	413	559	0	43							3	394	0	0	97	0	0	7	0	0
	452	447	453	0	423	1	470	495	0	154							1	351	3	12	37	0	0	12	0	0
	376	611	442	0	387	6	625	362	1	274							10	380	0	0	44	0	0	43	0	0
	381	720	353	0	696	3	737	397	0	293							21	433	0	0	21	0	0	84	0	0
	321	822	317	0	588	0	697	325	2	214							15	206	0	1	7	0	0	40	0	0
	360	814	316	0	756	1	438	211	8	237							0	154	0	15	5	0	0	47	0	0
	255	642	271	0	621	0	608	297	0	273							4	148	0	1	29	0	0	35	0	0
	104	600	282	0	740	0	744	341	1	296							1	351	2	6	10	0	0	52	0	0
	274	638	327	0	678	0	680	276	7	216							3	52	2	0	13	0	0	59	0	0
	113	516	321	0	615	0	738	144	4	425							0	104	0	0	23	2	0	21	0	0
	261	310	300	0	757	0	635	107	1	416							2	241	0	3	13	0	0	9	0	0
	214	311	223	1	710	0	611	101	1	340							0	282	0	0	4	0	0	28	0	0
	195	492	186	1	807	21	493	106	10	307							0	274	0	1	14	0	0	62	0	0
	176	716	247	3	785	63	550	230	0	333							0	339	0	0	9	0	0	55	0	0
	138	679	317	5	893	65	504	291	4	235							0	345	0	0	20	0	0	58	0	0
	86	534	370	0	771	51	493	311	2	223							0	282	0	0	13	0	0	37	0	0
	66	485	384	1	845	69	341	266	7	206							0	339	0	0	14	0	0	16	0	0
	29	351	450	2	795	40	234	165	6	170							0	549	0	0	7	0	0	0	0	0
	150	313	339	1	593	23	329	148	18	167							0	437	0	0	7	0	0	0	0	0
	185	208	521	1	414	13	363	79	1	131							0	198	0	0	2	0	0	3	0	0
	238	218	647	0	324	23	213	22	1	85							0	83	0	0	17	0	0	0	0	0
	230	292	488	0	376	29	337	125	4	70							0	277	0	0	6	0	0	0	0	0
	258	439	617	3	325	73	434	181	1	126							0	352	0	0	4	0	0	0	0	0
	128	429	581	4	280	51	60	124	7	100							5	41	0	0	18	0	0	0	0	0
	163	433	511	0	237	11	108	169	5	446							0	438	0	0	6	0	0	5	0	0
	218	386	524	1	232	15	364	73	1	529							0	148	0	0	1	0	0	10	0	0
	276	197	380	2	127	27	389	57	3	554							1	236	1	0	11	0	0	21	0	0
	344	183	419	5	173	86	224	74	4	603							4	139	0	5	18	0	0	75	0	0
	335	236	297	41	231	116	220	134	6	569							0	62	0	0	17	0	0	43	0	0
	299	255	115	114	166	84	568	181	15	635							0	279	0	6	15	0	0	55	0	0
	215	384	176	186	204	57	998	207	6	514							0	219	0	3	22	0	0	76	0	0
	47	270	145	225	174	112	1104	217	1	401							0	187	0	91	33	10	0	98	0	0
	132	289	207	250	129	100	1244	258	7	301							0	181	0	7	17	8	0	164	0	0
	148	287	406	243	115	9	1068	257	17	486							0	525	0	94	5	6	0	157	0	0
	155	206	485	141	152	9	832	292	3	193							0	360	0	49	19	5	0	173	0	0
	276	214	589	134	34	0	611	350	2	265							0	187	0	73	45	47	0	106	0	0
	404	251	699	126	136	12	397	155	3	159							0	179	0	0	69	52	0	55	0	0
	274	230	566	119	304	0	159	159	39	105							0	149	0	18	58	26	0	87	0	0
	384	202	566	59	638	0	82	140	8	40							0	265	0	78	38	17	0	92	0	0
	189	217	395	178	640	2	150	82	4	129							0	168	0	174	43	21	0	18	0	0
	149	299	305	150	639	0	130	130	9	248							0	125	0	15	44	1	0	44	0	0
	181	389	353	148	400	0	165	114	1	134							0	80	0	23	24	4	0	52	0	0
	190	302	283	132	336	2	173	71	4	214							0	177	0	21	29	5	0	29	0	0
	261	182	154	72	50	22	380	89	0	250							0	132	0	0	22	0	0	13	0	0
	290	65	121	173	219	7	548	134	5	239							0	92	0	2	15	0	0	10	0	0
	134	70	212	100	444	15	558	120	0	169							0	102	0	69	1	0	0	0	0	0
	30	87	204	208	551	14	484	58	0	209							0	101	0	13	0	0	0	7	0	0
	85	60	456	210	743	54	247	9	3	191							0	174	0	38	0	0	0	48	0	0
	159	64	452	192	868	58	166	11	1	157							0	196	0	9	0	0	0	27	0	0
	183	51	294	240	813	60	134	23	1	52							0	67	0	76	33	0	0	25	0	0
	165	48	330	331	717	19	130	39	2	76							0	31	0	14	25	0	0	24	0	0
	136	5	191	307	679	72	117	112	11	142							0	142	0	6	9	0	0	13	0	0
	57	12	189	368	747	122	65	75	2	31							0	213	0	0	31	0	0	18	0	0
	39	15	329	374	714	20	61	210	4	76							0	365	0	6	57	0	0	13	0	0
	83	3	675	411	709	38	81	242	0	151							0	280	0	6	22	0	0	0	0	0
	103	4	908	531	698	123	188	167	8	145							0	385	0	253	46	0	0	99	0	0
	15	0	876	570	694	71	302	150	6	163							3	180	0	51	5	1	0	232	0	0
	31	4	810	572	861	89	405	123	3	156							15	129	0	199	19	5	0	273	0	0
	22	23	749	567	930	91	614	125	10	114							11	320	0	35	56	2	0	267	0	0
	74	27	634	395	812	104	650	81	18	69							6	294	0	134	93	2	0	246	0	0
	2	25	452	446	1319	24	661	4	8	68							7	233	0	84	46	0	0	132	0	0
	25	9	341	413	1706	13	792	45	6	43							0	64	0	51	30	1	0	109	0	0
	39	18	189	365	1676	9	696	20	6	57							3	97	0	284	16	4	0	73	0	0
	35	18	159	351	1191	109	655	19	2	150							4	57	0	202	18	2	0	70	0	0
	24	35	228	420	573	113	716	30	1	109							15	291	0	23	8	0	0	35	0	0
	29	65	113	415	520	95	794	28	17	92							10	368	0	147	1	3	0	20	0	0
	64	41	85	352	475	74	652	19	12	86							8	211	0	27	5	2	0	3	0	0
	29	32	62	257	296	58	497	26	1	39							7	93	0	19	24	3	0	10	0	0
	73	8	143	291	376	46	585	37	8	6							0	207	0	259	12	0	0	0	0	0
	12	11	169	232	297	113	629	45	1	19							4	152	0	73	21	2	0	3	0	0
	51	0	182	154	239	196	442	12	11	51							0	149	0	174	18	0	0	0	0	0
	0	11	154	49	174	240	480	47	3	82							1	129	0	86	3	1	0	5	0	0
	5	2	133	107	289	237	389	41	15	125							3	49	0	52	9	0	0	0	0	0
	1	9	127	139	258	179	280	19	1	160							0	92	0	8	4	0	0	1	0	0
	90	3	197	105	245	182	188	103	4	208							4	45	0	42	2	0	0	4	0	0
	169	1	220	112	165	159	325	119	5	235							5	130	0	106	20	0	0	6	0	0
	103	6	132	91	311	148	140	59	3	300							2	30	0	13	23	0	0	4	0	0
	161	6	74	61	180	177	195	40	12	278							3	49	0	17	10	0	0	6	0	0
	125	4	85	21	471	212	343	13	4	217							2	44	0	0	2	0	0	9	0	0
	69	5	95	39	762	276	401	44	2	175							0	86	0	0	1	0	0	6	0	0
	211	5	54	36	783	136	391	55	3	196							0	134	0	0	12	0	0	0	0	0
	64	1	105	10	603	152	429	54	0	258							0	149	0	0	6	0	0	2	0	0
	2	3	118	26	689	144	335	165	18	320							0	118	0	0	4	0	0	0	0	0
	10	0	56	10	772	193	193	80	25	428							0	11	0	0	2	0	0	0	0	0
	24	4	113	0	721	195	211	207	10	537							2	80	0	10	7	0	0	1	0	0
	134	2	106	1	718	254	163	91	1	537							2	68	0	4	1	6	0	4	0	0
	73	0	23	10	893	251	307	83	2	389							0	109	0	46	8	0	0	6	0	0
	39	10	123	38	983	227	396	88	0	283							4	159	5	0	2	0	0	1	0	0
	62	20	77	79	932	198	526	116	17	294							2	169	3	0	9	0	0	0	0	0
	30	33	52	106	927	118	595	137	51	249							8	295	2	1	16	0	0	1	0	0
	6	33	16	87	843	213	434	219	31	171							4	172	1	3	5	0	0	0	0	0
	17	23	81	67	1330	225	217	217	36	213							5	117	3	10	3	0	0	0	0	0
	78	15	84	68	1516	153	327	170	21	73							0	24	7	5	28	0	0	1	0	0
	32	25	111	42	1338	165	183	163	14	193							0	104	0	0	7	0	0	0	0	0
	103	13	29	74	1539	316	248	178	34	47							0	273	0	0	14	0	0	0	0	0
	68	7	16	135	1563	387	137	162	27	59							5	288	1	0	9	0	0	0	0	0
	27	2	33	247	1677	532	84	208	19	40							2	70	0	2	22	0	0	0	0	0
	92	0	24	228	1255	600	108	201	12	205							10	70	0	0	9	0	0	0	0	0
	131	11	31	139	1159	594	107	144	31	240							1	141	1	0	11	0	0	1	0	0
	80	9	73	179	1185	611	95	176	88	179							1	141	36	0	20	2	0	0	0	0
	9	31	71	133	1239	542	51	193	94	150							2	160	6	0	3	0	0	0	0	0
	32	3	78	115	956	362	156	174	46	237							0	29	6	0	4	0	0	0	0	0
	73	2	32	81	988	654	56	148	46	180							0	77	4	0	47	0	0	0	0	0
	105	4	33	94	783	727	129	181	23	170							0	214	0	0	52	0	0	0	0	0
	60	7	89	117	712	679	76	217	45	278							0	49	1	0	51	0	0	0	0	0
	169	0	107	114	768	595	100	93	27	209							0	67	0	0	50	0	0	0	0	0
	112	12	101	93	646	561	106	44	42	384							0	26	0	0	24	0	0	0	0	0
	234	31	98	88	493	466	56	66	19	270							0	11	6	0	33	0	0	0	0	0
	79	41	204	139	362	217	314	54	20	263							0	12	0	0	33	0	0	0	0	0
	46	48	128	181	423	306	738	107	12	161							0	3	0	0	17	0	0	0	0	0
	25	50	116	184	271	197	1023	94	2	203							0	64	1	0	14	0	0	0	0	0
	241	54	125	184	777	181	962	257	5	207							0	17	1	0	34	0	0	0	0	0
	217	65	81	144	1024	155	774	276	8	358							0	143	12	0	16	0	0	0	0	0
	219	97	88	61	1177	38	478	229	25	512							0	8	32	0	6	0	0	0	0	0
	237	104	107	44	1530	92	312	91	80	519							0	10	12	0	1	0	0	0	0	0
	242	19	173	94	1760	130	151	108	135	504							0	142	3	0	1	0	0	0	0	0
	194	92	220	116	1550	331	30	188	193	445							0	58	2	0	0	0	0	0	0	0
	205	59	94	133	1785	303	282	211	145	477							0	113	1	0	2	0	0	0	0	0
	121	47	47	220	1805	338	397	254	245	380							0	9	2	0	2	0	0	0	0	0
	161	19	12	258	1437	320	296	180	216	379							0	9	0	0	9	0	0	0	0	0
	175	44	81	345	938	185	366	299	105	411							0	7	0	2	9	0	0	3	0	0
	252	44	31	479	755	82	533	218	99	418							0	15	1	0	13	0	0	0	0	0
	298	79	165	511	882	79	644	360	82	434							0	78	0	0	3	0	0	0	0	0
	234	88	95	531	793	25	692	462	27	455							0	62	0	0	9	0	0	0	0	0
	188	125	81	375	1076	20	743	421	52	340							0	6	0	0	13	0	0	1	0	0
	166	197	101	309	1243	62	692	235	101	387							0	6	3	0	7	0	0	0	0	0
	157	169	66	296	1215	45	616	218	150	487							0	0	4	0	3	0	0	0	0	0
	164	86	85	158	1222	152	638	260	198	411							0	9	0	0	7	0	0	0	0	0
	186	149	82	73	1184	67	608	212	191	232							0	36	1	0	54	0	0	0	0	0
	299	84	108	56	784	148	361	231	104	260							0	22	1	0	285	0	0	0	0	0
	433	111	111	129	924	147	152	180	134	185							0	14	0	0	72	0	0	0	0	0
	505	62	152	170	824	129	116	129	197	80							0	2	0	0	36	0	0	0	0	0
	403	58	75	196	637	73	319	127	132	89							0	2	2	0	6	0	0	0	0	0
	339	90	92	252	847	53	318	87	201	84							0	1	0	0	2	0	0	0	0	0
	311	31	136	208	600	68	218	83	123	74							0	0	0	0	4	0	0	0	0	0
	213	69	129	255	719	25	272	57	78	171							0	94	0	0	61	0	0	0	0	0
	203	112	164	271	617	53	229	138	70	128							0	12	0	0	60	0	0	0	0	0
	91	59	161	272	502	17	258	164	111	220							0	8	0	0	2	0	0	0	0	0
	61	86	172	211	658	11	338	141	28	72							0	2	0	0	0	0	0	0	0	0
	15	39	239	240	905	23	493	158	26	61							0	2	0	0	1	0	0	0	0	0
	46	40	306	245	870	24	377	118	0	79							0	0	0	0	1	0	0	0	0	0
	25	60	244	226	881	11	310	139	31	51							0	13	0	0	2	0	0	0	0	0
	20	41	214	161	850	8	440	83	74	71							0	12	0	0	8	0	0	0	0	0
	173	55	179	107	987	15	81	192	16	10							0	12	0	0	3	0	0	0	0	0
	230	51	143	27	1344	7	171	123	53	9							0	1	0	0	2	0	0	0	0	0
	226	51	88	55	1239	30	83	101	2	31							0	6	0	0	3	0	0	0	0	0
	309	20	200	70	631	27	67	214	31	13							0	4	0	0	3	0	0	0	0	0
	420	68	120	37	1061	13	188	143	9	29							0	0	0	0	4	0	0	0	0	0
	560	42	61	48	978	10	91	36	8	3							0	2	0	0	9	0	0	0	0	0
	550	103	56	13	1804	33	348	45	46	21							0	0	0	0	13	0	0	0	0	0
	510	114	56	7	1662	31	155	12	13	5							0	7	0	0	0	0	0	0	0	0
	459	108	208	7	1437	15	56	45	31	3							0	86	0	0	0	0	0	0	0	0
	331	141	195	1	1410	26	147	27	91	9							0	8	0	0	9	0	0	0	0	0
	344	210	321	13	1539	7	22	45	37	13							0	3	0	0	0	0	0	0	0	0
	380	250	294	1	1585	2	24	200	42	3							0	2	0	0	0	0	0	0	0	0
	449	236	325	7	1330	1	42	214	20	0							0	0	0	0	0	0	0	0	0	0
	448	315	237	2	1172	28	106	147	16	3							0	0	0	0	4	0	0	0	0	0
	380	317	475	6	989	8	88	154	77	3							0	1	0	0	44	0	0	0	0	0
	324	331	547	2	940	9	114	99	50	69							0	19	0	0	8	0	0	0	0	0
	388	349	631	6	972	7	328	63	56	146							0	15	0	0	19	0	0	0	0	0
	427	360	694	7	663	11	278	91	53	85							0	4	0	0	0	0	0	0	0	0
	307	360	598	1	273	1	258	170	174	88							0	1	0	0	0	0	0	0	0	0
	172	331	464	3	238	20	178	146	221	143							0	1	0	0	10	0	0	0	0	0
	242	345	504	4	183	22	160	127	145	243							0	1	0	0	1	0	0	0	0	0
	373	463	496	8	419	35	60	116	64	290							0	36	0	0	0	0	0	0	0	0
	217	529	585	4	559	5	299	55	182	360							0	7	0	0	18	0	0	0	0	0
	181	360	624	1	953	44	277	97	118	362							0	10	0	0	12	0	0	0	0	0
	172	315	715	15	1378	8	134	51	34	301							0	9	0	0	10	0	0	0	0	0
	171	331	845	7	1312	42	115	35	43	282							0	1	0	0	6	0	0	0	0	0
	341	336	693	8	1028	5	182	14	63	221							0	4	0	0	0	0	0	0	0	0
	424	245	497	14	566	128	204	61	77	326							0	25	0	0	3	0	0	0	0	0
	408	206	410	11	374	103	219	151	141	270							0	10	0	0	7	0	0	0	0	0
	309	262	448	20	529	36	103	115	258	124							0	12	0	0	2	0	0	0	0	0
	332	330	489	36	891	40	44	25	340	134							0	0	0	0	1	0	0	0	0	0
	394	223	711	157	1075	85	73	43	337	56							0	3	0	0	0	0	0	0	0	0
	613	225	984	86	1100	84	56	60	353	104							0	2	0	0	0	0	0	0	0	0
	808	181	1033	62	1006	86	95	139	332	47							0	5	0	0	0	0	0	0	0	0
	706	76	972	36	1073	82	56	124	198	138							0	50	0	0	0	0	0	0	0	0
	638	39	1005	3	1020	78	19	105	247	215							0	102	0	0	0	0	0	0	0	0
	708	16	860	35	1033	90	33	107	310	154							0	4	0	0	2	0	0	0	0	0
	817	8	891	117	913	147	51	136	326	138							0	7	0	0	0	0	0	0	0	0
	987	38	924	78	758	146	14	121	362	160							0	16	0	0	0	0	0	0	0	0
	850	29	836	49	723	100	139	111	420	202							0	114	0	0	1	0	0	0	0	0
	885	24	757	34	653	82	86	90	418	247							0	31	0	0	0	0	0	0	0	0
	737	83	670	3	560	51	168	122	268	276							0	78	0	0	1	0	0	0	0	0
	686	78	773	25	581	38	159	135	317	297							0	7	0	0	0	0	0	0	0	0
	591	64	804	16	576	64	29	160	333	316							0	6	0	0	0	0	0	0	0	0
	594	54	726	11	506	15	181	183	312	270							0	39	0	0	1	0	0	0	0	0
	752	47	754	1	489	84	111	99	212	208							0	5	0	0	0	0	0	0	0	0
	683	49	714	17	608	15	208	44	268	226							0	43	0	0	0	0	0	0	0	0
	610	30	722	6	435	45	254	84	309	138							0	7	0	0	0	0	0	0	0	0
	514	61	753	9	240	20	166	140	185	40							0	9	0	0	0	0	0	0	0	0
	501	154	542	15	198	84	102	105	212	87							0	8	0	0	0	0	0	0	0	0
	450	145	311	1	87	109	79	169	119	162							0	5	0	0	0	0	0	0	0	0
	435	130	193	10	191	80	264	50	70	166							0	5	0	0	0	0	0	0	0	0
	448	133	108	17	156	80	234	91	50	184							0	17	0	0	0	0	0	0	0	0
	256	120	129	48	173	104	467	44	75	184							0	2	1	0	0	0	0	0	0	0
	133	134	116	30	148	191	439	164	116	232							0	0	0	0	0	0	0	0	0	0
	145	103	93	26	117	170	306	270	123	130							0	0	0	0	0	0	0	0	0	0
	237	118	134	7	24	210	357	323	151	71							0	0	0	0	0	0	0	0	0	0
	658	119	175	0	94	132	139	414	129	177							0	43	0	0	0	0	0	0	0	0
	712	103	162	12	29	200	173	464	166	135							0	13	0	0	0	0	0	0	0	0
	531	82	95	6	123	108	335	430	329	72							0	18	0	0	0	0	0	0	0	0
	496	78	123	0	122	119	278	320	185	128							0	49	0	0	0	0	0	0	0	0
	302	65	30	17	130	129	255	275	170	152							0	37	0	0	0	0	0	0	0	0
	224	27	83	12	75	98	288	309	307	122							0	31	0	0	0	0	0	0	0	0
	96	8	63	13	66	233	181	201	287	123							0	119	0	0	0	0	0	0	0	0
	171	3	143	4	273	336	346	287	355	94							0	22	0	0	0	0	0	0	0	0
	107	15	262	44	125	366	245	273	285	64							0	32	0	0	0	0	0	0	0	0
	82	6	352	17	50	343	246	410	322	38							0	4	0	0	0	0	0	0	0	0
	330	5	252	9	129	527	195	463	310	78							0	3	0	0	0	0	0	0	0	0
	697	2	298	44	275	464	301	393	387	91							0	41	0	0	0	0	0	0	0	0
	1098	8	288	2	349	302	295	455	389	159							0	46	0	0	0	0	0	0	0	0
	1304	13	136	89	375	431	241	403	299	177							0	64	0	0	0	0	0	0	0	0
	1554	14	112	9	197	510	199	451	256	194							0	94	0	0	0	0	0	0	0	0
	1184	18	50	101	199	461	207	361	255	203							0	54	0	0	0	0	0	0	0	0
	1128	74	74	106	338	687	234	441	240	230							0	49	0	0	0	0	0	0	0	0
	1025	150	22	35	292	670	266	403	34	87							0	3	0	0	0	0	0	0	0	0
	693	202	55	18	555	687	252	334	5	49							0	12	0	0	0	0	0	0	0	0
	252	147	77	4	341	527	322	254	2	62							0	45	0	0	0	0	0	0	0	0
	96	162	24	8	284	617	427	140	0	99							0	68	0	0	0	0	0	0	0	0
	93	124	84	0	344	592	366	257	2	132							0	169	0	0	0	0	0	0	0	0
	184	59	121	1	467	658	380	235	0	78							0	18	0	0	0	0	0	0	0	0
	97	133	121	0	529	752	454	220	8	49							0	41	0	0	0	0	0	0	0	0
	120	185	80	1	707	711	458	251	0	130							0	10	0	0	0	0	0	0	0	0
	135	250	4	8	436	741	481	242	3	110							0	12	0	0	0	0	0	0	0	0
	124	261	13	0	271	495	434	191	1	112							0	21	0	0	0	0	0	0	0	0
	103	161	58	0	369	516	372	121	0	119							0	47	0	0	0	0	0	0	0	0
	204	149	77	10	522	810	153	224	0	99							0	49	0	0	0	0	0	0	0	0
	206	132	42	0	416	816	194	304	1	60							0	50	0	0	0	0	0	0	0	0
	277	115	123	0	400	602	295	314	2	49							0	34	0	0	0	0	0	0	0	0
	247	116	151	0	386	716	201	316	1	112							0	35	0	0	0	0	0	0	0	0
	218	130	152	29	313	804	279	278	0	87							0	29	0	0	0	0	0	0	0	0
	140	145	139	3	225	477	136	384	0	54							0	24	0	0	0	0	0	0	0	0
	142	241	155	0	108	561	137	479	1	111							0	15	0	0	0	0	0	0	0	0
	162	217	247	5	125	427	158	462	0	93							0	29	0	0	0	0	0	0	0	0
	40	139	334	8	120	212	108	471	0	100							0	132	0	0	0	0	0	0	0	0
	168	145	314	8	120	317	102	298	1	112							0	33	0	0	0	0	0	0	0	0
	244	55	452	4	43	182	145	322	2	80							0	23	0	0	0	0	0	0	0	0
	105	88	354	4	48	22	76	199	6	32							0	83	0	0	0	0	0	0	0	0
	148	36	474	0	119	82	71	221	0	48							0	63	0	0	0	0	0	0	0	0
	230	31	456	3	315	123	69	218	0	110							0	60	0	0	0	0	0	0	0	0
	270	17	488	15	332	263	126	229	2	87							0	92	0	0	0	0	0	0	0	0
	346	31	569	5	258	517	152	134	7	143							0	67	0	0	0	0	0	0	0	0
	282	17	532	17	182	728	169	184	1	99							0	79	0	0	0	0	0	0	0	0
	268	13	537	0	171	717	334	300	0	140							0	73	0	0	0	0	0	0	0	0
	205	3	545	0	191	385	483	265	0	124							0	23	0	0	0	0	0	0	0	0
	256	1	462	20	234	499	421	115	0	114							0	62	0	0	0	0	0	0	0	0
	84	5	372	31	147	328	463	227	4	39							0	86	0	0	0	0	0	0	0	0
	171	43	136	19	69	379	410	171	15	57							0	30	0	0	0	0	0	0	0	0
	172	13	355	8	70	181	656	141	1	47							0	14	0	0	0	0	0	0	0	0
	146	4	304	7	114	300	609	83	8	44							0	22	0	0	0	0	0	0	0	0
	296	6	334	13	88	172	569	56	0	39							0	179	0	0	0	0	0	0	0	0
	240	0	210	15	49	179	569	70	29	59							0	29	0	0	0	0	0	0	0	0
	78	2	95	9	88	217	674	110	0	107							0	35	0	0	2	0	0	0	0	0
	95	1	81	57	53	40	521	191	2	157							0	44	0	0	0	0	0	0	0	0
	320	0	233	83	139	125	332	294	22	196							0	23	0	0	0	0	0	0	0	0
	393	3	302	108	211	281	320	460	3	182							0	46	0	0	0	0	0	0	0	0
	NaN	NaN	NaN	NaN	NaN	NaN	NaN	NaN	NaN	NaN							NaN	NaN	NaN	NaN	NaN	NaN	NaN	NaN	NaN	NaN
	NaN	NaN	NaN	NaN	NaN	NaN	NaN	NaN	NaN	NaN							NaN	NaN	NaN	NaN	NaN	NaN	NaN	NaN	NaN	NaN
	NaN	NaN	NaN	NaN	NaN	NaN	NaN	NaN	NaN	NaN							NaN	NaN	NaN	NaN	NaN	NaN	NaN	NaN	NaN	NaN
	NaN	NaN	NaN	NaN	NaN	NaN	NaN	NaN	NaN	NaN							NaN	NaN	NaN	NaN	NaN	NaN	NaN	NaN	NaN	NaN
	NaN	NaN	NaN	NaN	NaN	NaN	NaN	NaN	NaN	NaN							NaN	NaN	NaN	NaN	NaN	NaN	NaN	NaN	NaN	NaN
	NaN	NaN	NaN	NaN	NaN	NaN	NaN	NaN	NaN	NaN							NaN	NaN	NaN	NaN	NaN	NaN	NaN	NaN	NaN	NaN
	NaN	NaN	NaN	NaN	NaN	NaN	NaN	NaN	NaN	NaN							NaN	NaN	NaN	NaN	NaN	NaN	NaN	NaN	NaN	NaN
	NaN	NaN	NaN	NaN	NaN	NaN	NaN	NaN	NaN	NaN							NaN	NaN	NaN	NaN	NaN	NaN	NaN	NaN	NaN	NaN
	NaN	NaN	NaN	NaN	NaN	NaN	NaN	NaN	NaN	NaN							NaN	NaN	NaN	NaN	NaN	NaN	NaN	NaN	NaN	NaN
	NaN	NaN	NaN	NaN	NaN	NaN	NaN	NaN	NaN	NaN							NaN	NaN	NaN	NaN	NaN	NaN	NaN	NaN	NaN	NaN
	NaN	NaN	NaN	NaN	NaN	NaN	NaN	NaN	NaN	NaN							NaN	NaN	NaN	NaN	NaN	NaN	NaN	NaN	NaN	NaN
	NaN	NaN	NaN	NaN	NaN	NaN	NaN	NaN	NaN	NaN							NaN	NaN	NaN	NaN	NaN	NaN	NaN	NaN	NaN	NaN
	NaN	NaN	NaN	NaN	NaN	NaN	NaN	NaN	NaN	NaN							NaN	NaN	NaN	NaN	NaN	NaN	NaN	NaN	NaN	NaN
	NaN	NaN	NaN	NaN	NaN	NaN	NaN	NaN	NaN	NaN							NaN	NaN	NaN	NaN	NaN	NaN	NaN	NaN	NaN	NaN
	NaN	NaN	NaN	NaN	NaN	NaN	NaN	NaN	NaN	NaN							NaN	NaN	NaN	NaN	NaN	NaN	NaN	NaN	NaN	NaN
	NaN	NaN	NaN	NaN	NaN	NaN	NaN	NaN	NaN	NaN							NaN	NaN	NaN	NaN	NaN	NaN	NaN	NaN	NaN	NaN
	NaN	NaN	NaN	NaN	NaN	NaN	NaN	NaN	NaN	NaN							NaN	NaN	NaN	NaN	NaN	NaN	NaN	NaN	NaN	NaN
	NaN	NaN	NaN	NaN	NaN	NaN	NaN	NaN	NaN	NaN							NaN	NaN	NaN	NaN	NaN	NaN	NaN	NaN	NaN	NaN
	NaN	NaN	NaN	NaN	NaN	NaN	NaN	NaN	NaN	NaN							NaN	NaN	NaN	NaN	NaN	NaN	NaN	NaN	NaN	NaN
	NaN	NaN	NaN	NaN	NaN	NaN	NaN	NaN	NaN	NaN							NaN	NaN	NaN	NaN	NaN	NaN	NaN	NaN	NaN	NaN
	NaN	NaN	NaN	NaN	NaN	NaN	NaN	NaN	NaN	NaN							NaN	NaN	NaN	NaN	NaN	NaN	NaN	NaN	NaN	NaN
	NaN	NaN	NaN	NaN	NaN	NaN	NaN	NaN	NaN	NaN							NaN	NaN	NaN	NaN	NaN	NaN	NaN	NaN	NaN	NaN
	NaN	NaN	NaN	NaN	NaN	NaN	NaN	NaN	NaN	NaN							NaN	NaN	NaN	NaN	NaN	NaN	NaN	NaN	NaN	NaN
	NaN	NaN	NaN	NaN	NaN	NaN	NaN	NaN	NaN	NaN							NaN	NaN	NaN	NaN	NaN	NaN	NaN	NaN	NaN	NaN
	NaN	NaN	NaN	NaN	NaN	NaN	NaN	NaN	NaN	NaN							NaN	NaN	NaN	NaN	NaN	NaN	NaN	NaN	NaN	NaN
	NaN	NaN	NaN	NaN	NaN	NaN	NaN	NaN	NaN	NaN							NaN	NaN	NaN	NaN	NaN	NaN	NaN	NaN	NaN	NaN
	NaN	NaN	NaN	NaN	NaN	NaN	NaN	NaN	NaN	NaN							NaN	NaN	NaN	NaN	NaN	NaN	NaN	NaN	NaN	NaN
	NaN	NaN	NaN	NaN	NaN	NaN	NaN	NaN	NaN	NaN							NaN	NaN	NaN	NaN	NaN	NaN	NaN	NaN	NaN	NaN
	NaN	NaN	NaN	NaN	NaN	NaN	NaN	NaN	NaN	NaN							NaN	NaN	NaN	NaN	NaN	NaN	NaN	NaN	NaN	NaN
	NaN	NaN	NaN	NaN	NaN	NaN	NaN	NaN	NaN	NaN							NaN	NaN	NaN	NaN	NaN	NaN	NaN	NaN	NaN	NaN
	NaN	NaN	NaN	NaN	NaN	NaN	NaN	NaN	NaN	NaN							NaN	NaN	NaN	NaN	NaN	NaN	NaN	NaN	NaN	NaN
	NaN	NaN	NaN	NaN	NaN	NaN	NaN	NaN	NaN	NaN							NaN	NaN	NaN	NaN	NaN	NaN	NaN	NaN	NaN	NaN
	NaN	NaN	NaN	NaN	NaN	NaN	NaN	NaN	NaN	NaN							NaN	NaN	NaN	NaN	NaN	NaN	NaN	NaN	NaN	NaN
	NaN	NaN	NaN	NaN	NaN	NaN	NaN	NaN	NaN	NaN							NaN	NaN	NaN	NaN	NaN	NaN	NaN	NaN	NaN	NaN
	NaN	NaN	NaN	NaN	NaN	NaN	NaN	NaN	NaN	NaN							NaN	NaN	NaN	NaN	NaN	NaN	NaN	NaN	NaN	NaN
	NaN	NaN	NaN	NaN	NaN	NaN	NaN	NaN	NaN	NaN							NaN	NaN	NaN	NaN	NaN	NaN	NaN	NaN	NaN	NaN
	NaN	NaN	NaN	NaN	NaN	NaN	NaN	NaN	NaN	NaN							NaN	NaN	NaN	NaN	NaN	NaN	NaN	NaN	NaN	NaN
	NaN	NaN	NaN	NaN	NaN	NaN	NaN	NaN	NaN	NaN							NaN	NaN	NaN	NaN	NaN	NaN	NaN	NaN	NaN	NaN
	NaN	NaN	NaN	NaN	NaN	NaN	NaN	NaN	NaN	NaN							NaN	NaN	NaN	NaN	NaN	NaN	NaN	NaN	NaN	NaN
	NaN	NaN	NaN	NaN	NaN	NaN	NaN	NaN	NaN	NaN							NaN	NaN	NaN	NaN	NaN	NaN	NaN	NaN	NaN	NaN
	NaN	NaN	NaN	NaN	NaN	NaN	NaN	NaN	NaN	NaN							NaN	NaN	NaN	NaN	NaN	NaN	NaN	NaN	NaN	NaN
	NaN	NaN	NaN	NaN	NaN	NaN	NaN	NaN	NaN	NaN							NaN	NaN	NaN	NaN	NaN	NaN	NaN	NaN	NaN	NaN
	NaN	NaN	NaN	NaN	NaN	NaN	NaN	NaN	NaN	NaN							NaN	NaN	NaN	NaN	NaN	NaN	NaN	NaN	NaN	NaN
	NaN	NaN	NaN	NaN	NaN	NaN	NaN	NaN	NaN	NaN							NaN	NaN	NaN	NaN	NaN	NaN	NaN	NaN	NaN	NaN
	NaN	NaN	NaN	NaN	NaN	NaN	NaN	NaN	NaN	NaN							NaN	NaN	NaN	NaN	NaN	NaN	NaN	NaN	NaN	NaN
	NaN	NaN	NaN	NaN	NaN	NaN	NaN	NaN	NaN	NaN							NaN	NaN	NaN	NaN	NaN	NaN	NaN	NaN	NaN	NaN
	NaN	NaN	NaN	NaN	NaN	NaN	NaN	NaN	NaN	NaN							NaN	NaN	NaN	NaN	NaN	NaN	NaN	NaN	NaN	NaN
	NaN	NaN	NaN	NaN	NaN	NaN	NaN	NaN	NaN	NaN							NaN	NaN	NaN	NaN	NaN	NaN	NaN	NaN	NaN	NaN
	NaN	NaN	NaN	NaN	NaN	NaN	NaN	NaN	NaN	NaN							NaN	NaN	NaN	NaN	NaN	NaN	NaN	NaN	NaN	NaN
	NaN	NaN	NaN	NaN	NaN	NaN	NaN	NaN	NaN	NaN							NaN	NaN	NaN	NaN	NaN	NaN	NaN	NaN	NaN	NaN
	NaN	NaN	NaN	NaN	NaN	NaN	NaN	NaN	NaN	NaN							NaN	NaN	NaN	NaN	NaN	NaN	NaN	NaN	NaN	NaN
	NaN	NaN	NaN	NaN	NaN	NaN	NaN	NaN	NaN	NaN							NaN	NaN	NaN	NaN	NaN	NaN	NaN	NaN	NaN	NaN
	NaN	NaN	NaN	NaN	NaN	NaN	NaN	NaN	NaN	NaN							NaN	NaN	NaN	NaN	NaN	NaN	NaN	NaN	NaN	NaN
	NaN	NaN	NaN	NaN	NaN	NaN	NaN	NaN	NaN	NaN							NaN	NaN	NaN	NaN	NaN	NaN	NaN	NaN	NaN	NaN
	NaN	NaN	NaN	NaN	NaN	NaN	NaN	NaN	NaN	NaN							NaN	NaN	NaN	NaN	NaN	NaN	NaN	NaN	NaN	NaN
	NaN	NaN	NaN	NaN	NaN	NaN	NaN	NaN	NaN	NaN							NaN	NaN	NaN	NaN	NaN	NaN	NaN	NaN	NaN	NaN
	NaN	NaN	NaN	NaN	NaN	NaN	NaN	NaN	NaN	NaN							NaN	NaN	NaN	NaN	NaN	NaN	NaN	NaN	NaN	NaN
	NaN	NaN	NaN	NaN	NaN	NaN	NaN	NaN	NaN	NaN							NaN	NaN	NaN	NaN	NaN	NaN	NaN	NaN	NaN	NaN
	NaN	NaN	NaN	NaN	NaN	NaN	NaN	NaN	NaN	NaN							NaN	NaN	NaN	NaN	NaN	NaN	NaN	NaN	NaN	NaN
	NaN	NaN	NaN	NaN	NaN	NaN	NaN	NaN	NaN	NaN							NaN	NaN	NaN	NaN	NaN	NaN	NaN	NaN	NaN	NaN
	NaN	NaN	NaN	NaN	NaN	NaN	NaN	NaN	NaN	NaN							NaN	NaN	NaN	NaN	NaN	NaN	NaN	NaN	NaN	NaN
	NaN	NaN	NaN	NaN	NaN	NaN	NaN	NaN	NaN	NaN							NaN	NaN	NaN	NaN	NaN	NaN	NaN	NaN	NaN	NaN
	NaN	NaN	NaN	NaN	NaN	NaN	NaN	NaN	NaN	NaN							NaN	NaN	NaN	NaN	NaN	NaN	NaN	NaN	NaN	NaN
	NaN	NaN	NaN	NaN	NaN	NaN	NaN	NaN	NaN	NaN							NaN	NaN	NaN	NaN	NaN	NaN	NaN	NaN	NaN	NaN
	NaN	NaN	NaN	NaN	NaN	NaN	NaN	NaN	NaN	NaN							NaN	NaN	NaN	NaN	NaN	NaN	NaN	NaN	NaN	NaN
	NaN	NaN	NaN	NaN	NaN	NaN	NaN	NaN	NaN	NaN							NaN	NaN	NaN	NaN	NaN	NaN	NaN	NaN	NaN	NaN
	NaN	NaN	NaN	NaN	NaN	NaN	NaN	NaN	NaN	NaN							NaN	NaN	NaN	NaN	NaN	NaN	NaN	NaN	NaN	NaN
	NaN	NaN	NaN	NaN	NaN	NaN	NaN	NaN	NaN	NaN							NaN	NaN	NaN	NaN	NaN	NaN	NaN	NaN	NaN	NaN
	NaN	NaN	NaN	NaN	NaN	NaN	NaN	NaN	NaN	NaN							NaN	NaN	NaN	NaN	NaN	NaN	NaN	NaN	NaN	NaN
	NaN	NaN	NaN	NaN	NaN	NaN	NaN	NaN	NaN	NaN							NaN	NaN	NaN	NaN	NaN	NaN	NaN	NaN	NaN	NaN
	NaN	NaN	NaN	NaN	NaN	NaN	NaN	NaN	NaN	NaN							NaN	NaN	NaN	NaN	NaN	NaN	NaN	NaN	NaN	NaN
	NaN	NaN	NaN	NaN	NaN	NaN	NaN	NaN	NaN	NaN							NaN	NaN	NaN	NaN	NaN	NaN	NaN	NaN	NaN	NaN
	NaN	NaN	NaN	NaN	NaN	NaN	NaN	NaN	NaN	NaN							NaN	NaN	NaN	NaN	NaN	NaN	NaN	NaN	NaN	NaN
	NaN	NaN	NaN	NaN	NaN	NaN	NaN	NaN	NaN	NaN							NaN	NaN	NaN	NaN	NaN	NaN	NaN	NaN	NaN	NaN
	NaN	NaN	NaN	NaN	NaN	NaN	NaN	NaN	NaN	NaN							NaN	NaN	NaN	NaN	NaN	NaN	NaN	NaN	NaN	NaN
	NaN	NaN	NaN	NaN	NaN	NaN	NaN	NaN	NaN	NaN							NaN	NaN	NaN	NaN	NaN	NaN	NaN	NaN	NaN	NaN
	NaN	NaN	NaN	NaN	NaN	NaN	NaN	NaN	NaN	NaN							NaN	NaN	NaN	NaN	NaN	NaN	NaN	NaN	NaN	NaN
	NaN	NaN	NaN	NaN	NaN	NaN	NaN	NaN	NaN	NaN							NaN	NaN	NaN	NaN	NaN	NaN	NaN	NaN	NaN	NaN
	NaN	NaN	NaN	NaN	NaN	NaN	NaN	NaN	NaN	NaN							NaN	NaN	NaN	NaN	NaN	NaN	NaN	NaN	NaN	NaN
	NaN	NaN	NaN	NaN	NaN	NaN	NaN	NaN	NaN	NaN							NaN	NaN	NaN	NaN	NaN	NaN	NaN	NaN	NaN	NaN
	NaN	NaN	NaN	NaN	NaN	NaN	NaN	NaN	NaN	NaN							NaN	NaN	NaN	NaN	NaN	NaN	NaN	NaN	NaN	NaN
	NaN	NaN	NaN	NaN	NaN	NaN	NaN	NaN	NaN	NaN							NaN	NaN	NaN	NaN	NaN	NaN	NaN	NaN	NaN	NaN
	NaN	NaN	NaN	NaN	NaN	NaN	NaN	NaN	NaN	NaN							NaN	NaN	NaN	NaN	NaN	NaN	NaN	NaN	NaN	NaN
	NaN	NaN	NaN	NaN	NaN	NaN	NaN	NaN	NaN	NaN							NaN	NaN	NaN	NaN	NaN	NaN	NaN	NaN	NaN	NaN
	NaN	NaN	NaN	NaN	NaN	NaN	NaN	NaN	NaN	NaN							NaN	NaN	NaN	NaN	NaN	NaN	NaN	NaN	NaN	NaN
	NaN	NaN	NaN	NaN	NaN	NaN	NaN	NaN	NaN	NaN							NaN	NaN	NaN	NaN	NaN	NaN	NaN	NaN	NaN	NaN
	NaN	NaN	NaN	NaN	NaN	NaN	NaN	NaN	NaN	NaN							NaN	NaN	NaN	NaN	NaN	NaN	NaN	NaN	NaN	NaN
	NaN	NaN	NaN	NaN	NaN	NaN	NaN	NaN	NaN	NaN							NaN	NaN	NaN	NaN	NaN	NaN	NaN	NaN	NaN	NaN
	NaN	NaN	NaN	NaN	NaN	NaN	NaN	NaN	NaN	NaN							NaN	NaN	NaN	NaN	NaN	NaN	NaN	NaN	NaN	NaN
	NaN	NaN	NaN	NaN	NaN	NaN	NaN	NaN	NaN	NaN							NaN	NaN	NaN	NaN	NaN	NaN	NaN	NaN	NaN	NaN
	NaN	NaN	NaN	NaN	NaN	NaN	NaN	NaN	NaN	NaN							NaN	NaN	NaN	NaN	NaN	NaN	NaN	NaN	NaN	NaN
	NaN	NaN	NaN	NaN	NaN	NaN	NaN	NaN	NaN	NaN							NaN	NaN	NaN	NaN	NaN	NaN	NaN	NaN	NaN	NaN
	NaN	NaN	NaN	NaN	NaN	NaN	NaN	NaN	NaN	NaN							NaN	NaN	NaN	NaN	NaN	NaN	NaN	NaN	NaN	NaN
	NaN	NaN	NaN	NaN	NaN	NaN	NaN	NaN	NaN	NaN							NaN	NaN	NaN	NaN	NaN	NaN	NaN	NaN	NaN	NaN
	NaN	NaN	NaN	NaN	NaN	NaN	NaN	NaN	NaN	NaN							NaN	NaN	NaN	NaN	NaN	NaN	NaN	NaN	NaN	NaN
	NaN	NaN	NaN	NaN	NaN	NaN	NaN	NaN	NaN	NaN							NaN	NaN	NaN	NaN	NaN	NaN	NaN	NaN	NaN	NaN
	NaN	NaN	NaN	NaN	NaN	NaN	NaN	NaN	NaN	NaN							NaN	NaN	NaN	NaN	NaN	NaN	NaN	NaN	NaN	NaN
	NaN	NaN	NaN	NaN	NaN	NaN	NaN	NaN	NaN	NaN							NaN	NaN	NaN	NaN	NaN	NaN	NaN	NaN	NaN	NaN
	NaN	NaN	NaN	NaN	NaN	NaN	NaN	NaN	NaN	NaN							NaN	NaN	NaN	NaN	NaN	NaN	NaN	NaN	NaN	NaN
	NaN	NaN	NaN	NaN	NaN	NaN	NaN	NaN	NaN	NaN							NaN	NaN	NaN	NaN	NaN	NaN	NaN	NaN	NaN	NaN
	NaN	NaN	NaN	NaN	NaN	NaN	NaN	NaN	NaN	NaN							NaN	NaN	NaN	NaN	NaN	NaN	NaN	NaN	NaN	NaN
	NaN	NaN	NaN	NaN	NaN	NaN	NaN	NaN	NaN	NaN							NaN	NaN	NaN	NaN	NaN	NaN	NaN	NaN	NaN	NaN
	NaN	NaN	NaN	NaN	NaN	NaN	NaN	NaN	NaN	NaN							NaN	NaN	NaN	NaN	NaN	NaN	NaN	NaN	NaN	NaN
	NaN	NaN	NaN	NaN	NaN	NaN	NaN	NaN	NaN	NaN							NaN	NaN	NaN	NaN	NaN	NaN	NaN	NaN	NaN	NaN
	NaN	NaN	NaN	NaN	NaN	NaN	NaN	NaN	NaN	NaN							NaN	NaN	NaN	NaN	NaN	NaN	NaN	NaN	NaN	NaN
	NaN	NaN	NaN	NaN	NaN	NaN	NaN	NaN	NaN	NaN							NaN	NaN	NaN	NaN	NaN	NaN	NaN	NaN	NaN	NaN
	NaN	NaN	NaN	NaN	NaN	NaN	NaN	NaN	NaN	NaN							NaN	NaN	NaN	NaN	NaN	NaN	NaN	NaN	NaN	NaN
	NaN	NaN	NaN	NaN	NaN	NaN	NaN	NaN	NaN	NaN							NaN	NaN	NaN	NaN	NaN	NaN	NaN	NaN	NaN	NaN
	NaN	NaN	NaN	NaN	NaN	NaN	NaN	NaN	NaN	NaN							NaN	NaN	NaN	NaN	NaN	NaN	NaN	NaN	NaN	NaN
	NaN	NaN	NaN	NaN	NaN	NaN	NaN	NaN	NaN	NaN							NaN	NaN	NaN	NaN	NaN	NaN	NaN	NaN	NaN	NaN
	NaN	NaN	NaN	NaN	NaN	NaN	NaN	NaN	NaN	NaN							NaN	NaN	NaN	NaN	NaN	NaN	NaN	NaN	NaN	NaN
	NaN	NaN	NaN	NaN	NaN	NaN	NaN	NaN	NaN	NaN							NaN	NaN	NaN	NaN	NaN	NaN	NaN	NaN	NaN	NaN
	NaN	NaN	NaN	NaN	NaN	NaN	NaN	NaN	NaN	NaN							NaN	NaN	NaN	NaN	NaN	NaN	NaN	NaN	NaN	NaN
	NaN	NaN	NaN	NaN	NaN	NaN	NaN	NaN	NaN	NaN							NaN	NaN	NaN	NaN	NaN	NaN	NaN	NaN	NaN	NaN
	NaN	NaN	NaN	NaN	NaN	NaN	NaN	NaN	NaN	NaN							NaN	NaN	NaN	NaN	NaN	NaN	NaN	NaN	NaN	NaN
	NaN	NaN	NaN	NaN	NaN	NaN	NaN	NaN	NaN	NaN							NaN	NaN	NaN	NaN	NaN	NaN	NaN	NaN	NaN	NaN
	NaN	NaN	NaN	NaN	NaN	NaN	NaN	NaN	NaN	NaN							NaN	NaN	NaN	NaN	NaN	NaN	NaN	NaN	NaN	NaN
	NaN	NaN	NaN	NaN	NaN	NaN	NaN	NaN	NaN	NaN							NaN	NaN	NaN	NaN	NaN	NaN	NaN	NaN	NaN	NaN
	NaN	NaN	NaN	NaN	NaN	NaN	NaN	NaN	NaN	NaN							NaN	NaN	NaN	NaN	NaN	NaN	NaN	NaN	NaN	NaN
	NaN	NaN	NaN	NaN	NaN	NaN	NaN	NaN	NaN	NaN							NaN	NaN	NaN	NaN	NaN	NaN	NaN	NaN	NaN	NaN
	NaN	NaN	NaN	NaN	NaN	NaN	NaN	NaN	NaN	NaN							NaN	NaN	NaN	NaN	NaN	NaN	NaN	NaN	NaN	NaN
	NaN	NaN	NaN	NaN	NaN	NaN	NaN	NaN	NaN	NaN							NaN	NaN	NaN	NaN	NaN	NaN	NaN	NaN	NaN	NaN
	NaN	NaN	NaN	NaN	NaN	NaN	NaN	NaN	NaN	NaN							NaN	NaN	NaN	NaN	NaN	NaN	NaN	NaN	NaN	NaN
	NaN	NaN	NaN	NaN	NaN	NaN	NaN	NaN	NaN	NaN							NaN	NaN	NaN	NaN	NaN	NaN	NaN	NaN	NaN	NaN
	NaN	NaN	NaN	NaN	NaN	NaN	NaN	NaN	NaN	NaN							NaN	NaN	NaN	NaN	NaN	NaN	NaN	NaN	NaN	NaN
	NaN	NaN	NaN	NaN	NaN	NaN	NaN	NaN	NaN	NaN							NaN	NaN	NaN	NaN	NaN	NaN	NaN	NaN	NaN	NaN
	NaN	NaN	NaN	NaN	NaN	NaN	NaN	NaN	NaN	NaN							NaN	NaN	NaN	NaN	NaN	NaN	NaN	NaN	NaN	NaN
	NaN	NaN	NaN	NaN	NaN	NaN	NaN	NaN	NaN	NaN							NaN	NaN	NaN	NaN	NaN	NaN	NaN	NaN	NaN	NaN
	NaN	NaN	NaN	NaN	NaN	NaN	NaN	NaN	NaN	NaN							NaN	NaN	NaN	NaN	NaN	NaN	NaN	NaN	NaN	NaN
	NaN	NaN	NaN	NaN	NaN	NaN	NaN	NaN	NaN	NaN							NaN	NaN	NaN	NaN	NaN	NaN	NaN	NaN	NaN	NaN
	NaN	NaN	NaN	NaN	NaN	NaN	NaN	NaN	NaN	NaN							NaN	NaN	NaN	NaN	NaN	NaN	NaN	NaN	NaN	NaN
	NaN	NaN	NaN	NaN	NaN	NaN	NaN	NaN	NaN	NaN							NaN	NaN	NaN	NaN	NaN	NaN	NaN	NaN	NaN	NaN
	NaN	NaN	NaN	NaN	NaN	NaN	NaN	NaN	NaN	NaN							NaN	NaN	NaN	NaN	NaN	NaN	NaN	NaN	NaN	NaN
	NaN	NaN	NaN	NaN	NaN	NaN	NaN	NaN	NaN	NaN							NaN	NaN	NaN	NaN	NaN	NaN	NaN	NaN	NaN	NaN
	NaN	NaN	NaN	NaN	NaN	NaN	NaN	NaN	NaN	NaN							NaN	NaN	NaN	NaN	NaN	NaN	NaN	NaN	NaN	NaN
	NaN	NaN	NaN	NaN	NaN	NaN	NaN	NaN	NaN	NaN							NaN	NaN	NaN	NaN	NaN	NaN	NaN	NaN	NaN	NaN
	NaN	NaN	NaN	NaN	NaN	NaN	NaN	NaN	NaN	NaN							NaN	NaN	NaN	NaN	NaN	NaN	NaN	NaN	NaN	NaN
	NaN	NaN	NaN	NaN	NaN	NaN	NaN	NaN	NaN	NaN							NaN	NaN	NaN	NaN	NaN	NaN	NaN	NaN	NaN	NaN
	NaN	NaN	NaN	NaN	NaN	NaN	NaN	NaN	NaN	NaN							NaN	NaN	NaN	NaN	NaN	NaN	NaN	NaN	NaN	NaN
	NaN	NaN	NaN	NaN	NaN	NaN	NaN	NaN	NaN	NaN							NaN	NaN	NaN	NaN	NaN	NaN	NaN	NaN	NaN	NaN
	NaN	NaN	NaN	NaN	NaN	NaN	NaN	NaN	NaN	NaN							NaN	NaN	NaN	NaN	NaN	NaN	NaN	NaN	NaN	NaN
	NaN	NaN	NaN	NaN	NaN	NaN	NaN	NaN	NaN	NaN							NaN	NaN	NaN	NaN	NaN	NaN	NaN	NaN	NaN	NaN
	NaN	NaN	NaN	NaN	NaN	NaN	NaN	NaN	NaN	NaN							NaN	NaN	NaN	NaN	NaN	NaN	NaN	NaN	NaN	NaN
	NaN	NaN	NaN	NaN	NaN	NaN	NaN	NaN	NaN	NaN							NaN	NaN	NaN	NaN	NaN	NaN	NaN	NaN	NaN	NaN
	NaN	NaN	NaN	NaN	NaN	NaN	NaN	NaN	NaN	NaN							NaN	NaN	NaN	NaN	NaN	NaN	NaN	NaN	NaN	NaN
	NaN	NaN	NaN	NaN	NaN	NaN	NaN	NaN	NaN	NaN							NaN	NaN	NaN	NaN	NaN	NaN	NaN	NaN	NaN	NaN
	NaN	NaN	NaN	NaN	NaN	NaN	NaN	NaN	NaN	NaN							NaN	NaN	NaN	NaN	NaN	NaN	NaN	NaN	NaN	NaN
	NaN	NaN	NaN	NaN	NaN	NaN	NaN	NaN	NaN	NaN							NaN	NaN	NaN	NaN	NaN	NaN	NaN	NaN	NaN	NaN
	NaN	NaN	NaN	NaN	NaN	NaN	NaN	NaN	NaN	NaN							NaN	NaN	NaN	NaN	NaN	NaN	NaN	NaN	NaN	NaN
	NaN	NaN	NaN	NaN	NaN	NaN	NaN	NaN	NaN	NaN							NaN	NaN	NaN	NaN	NaN	NaN	NaN	NaN	NaN	NaN
	NaN	NaN	NaN	NaN	NaN	NaN	NaN	NaN	NaN	NaN							NaN	NaN	NaN	NaN	NaN	NaN	NaN	NaN	NaN	NaN
	26	75	66	187	37	56	448	43	24	322							0	128	62	0	7	0	0	0	0	0
	204	12	175	79	261	696	200	6	293	48							0	0	0	0	0	0	0	2	0	0
	190	89	226	142	405	365	238	28	169	67							0	0	0	0	0	0	0	6	0	0
	129	180	80	69	389	394	157	25	103	62							0	0	0	0	0	0	0	14	0	0
	2	150	120	40	285	361	77	15	100	43							0	0	0	0	0	0	0	35	0	0
	19	115	143	26	117	405	77	9	203	116							0	0	0	0	0	0	0	17	0	0
	3	158	152	57	34	376	32	2	168	112							0	0	0	0	0	0	0	19	0	0
	23	85	83	43	16	376	45	4	156	43							0	0	0	0	0	0	0	3	0	0
	42	62	91	15	0	438	195	53	136	64							0	0	0	0	0	0	0	1	0	0
	42	34	5	29	15	433	199	14	107	98							0	0	0	0	0	0	0	12	0	0
	81	73	28	83	3	353	116	8	25	38							0	0	1	0	0	0	0	9	0	0
	13	94	8	69	63	504	377	5	23	91							0	0	0	0	0	0	0	23	0	0
	51	18	47	70	39	393	466	19	56	41							0	0	0	0	0	0	0	34	0	0
	24	14	38	160	79	151	262	28	45	42							0	0	0	0	0	0	0	48	0	0
	29	22	53	151	91	125	328	31	1	109							0	0	0	0	17	0	0	65	0	0
	33	70	64	64	97	220	463	4	134	60							0	0	0	0	30	0	0	32	0	0
	121	249	40	334	342	169	405	0	216	107							0	0	0	0	23	0	0	20	0	0
	24	312	92	437	290	412	374	14	42	251							0	0	0	0	0	0	0	43	0	0
	45	223	24	484	328	499	228	46	128	244							0	0	0	0	1	0	0	60	0	0
	62	241	7	423	306	446	453	38	144	180							0	0	0	0	0	0	0	55	0	0
	92	303	48	441	305	424	553	37	80	127							0	0	0	0	0	0	0	7	0	0
	47	346	35	606	417	309	307	72	72	100							0	0	0	0	0	0	0	53	0	0
	81	374	73	543	541	211	279	57	78	142							0	0	0	0	0	0	0	38	0	0
	157	354	52	518	708	379	340	73	102	81							0	0	0	0	0	0	0	52	0	0
	117	297	39	250	970	517	583	61	93	32							0	0	0	0	0	0	0	60	0	0
	167	283	79	251	890	559	251	97	74	113							0	0	0	0	0	0	0	51	0	0
	163	511	23	260	708	165	350	115	40	103							0	0	0	0	0	0	0	16	0	0
	59	639	39	241	759	266	219	92	52	177							0	0	0	0	0	0	0	25	0	0
	11	554	34	200	727	45	131	23	39	227							0	0	0	0	0	0	0	12	0	0
	124	522	88	84	529	214	489	11	67	215							0	0	0	0	0	0	0	14	0	0
	158	374	25	146	538	579	328	9	22	269							0	0	0	0	0	0	0	49	0	0
	128	305	90	136	412	407	64	4	65	231							0	1	0	0	0	0	0	23	0	0
	29	181	37	314	394	487	132	3	6	169							0	0	0	0	0	0	0	11	0	0
	14	133	98	498	208	182	78	0	11	119							0	0	0	0	2	0	0	18	0	0
	41	268	41	515	213	525	247	37	22	70							0	0	0	0	0	0	0	17	0	0
	75	236	55	431	169	290	170	21	21	56							0	0	0	0	0	0	0	1	0	0
	115	159	6	402	63	98	17	3	33	62							0	0	0	0	0	0	0	28	0	0
	233	158	25	338	202	290	47	24	79	24							0	0	0	0	0	0	0	56	0	0
	284	99	25	295	194	177	11	72	14	17							0	0	0	0	6	0	0	54	0	0
	190	40	68	297	152	109	181	86	12	30							0	0	0	0	13	0	0	31	0	0
	153	68	114	361	187	112	39	89	4	36							0	0	0	0	0	0	0	19	0	0
	117	88	5	358	106	106	71	68	83	81							0	0	0	0	0	0	0	24	0	0
	48	21	73	238	35	247	212	48	112	54							0	0	0	0	0	0	0	21	0	0
	14	27	110	260	28	31	301	35	63	20							0	0	0	0	8	0	0	10	0	0
	161	149	25	230	53	48	237	49	120	29							0	0	0	0	17	0	0	2	0	0
	178	60	44	270	109	149	23	56	63	62							0	0	0	1	35	0	0	11	0	0
	254	51	17	210	50	64	138	60	146	58							0	0	0	0	37	0	0	22	0	0
	137	67	15	191	66	104	62	70	67	97							0	0	0	0	27	0	0	28	0	0
	205	41	18	233	145	194	126	108	13	118							0	0	0	0	38	0	0	55	0	0
	238	10	7	251	227	105	59	96	26	88							0	0	0	0	19	0	0	62	0	0
	353	27	3	261	118	209	24	178	18	52							0	0	0	0	16	0	0	46	0	0
	230	32	6	293	180	137	120	91	67	109							0	0	0	0	8	0	0	58	0	0
	76	48	19	251	177	158	96	128	121	43							0	0	0	0	31	0	0	46	0	0
	45	40	103	180	108	335	85	25	230	50							0	0	0	0	55	0	0	50	0	0
	48	13	50	174	147	351	51	56	125	29							0	0	0	0	18	0	0	119	0	0
	18	102	0	139	218	319	22	74	88	60							0	0	0	0	11	0	0	63	0	0
	37	105	31	110	278	302	15	17	106	66							0	0	0	0	25	0	0	52	0	0
	25	77	8	54	232	249	106	69	97	87							0	0	0	0	19	0	0	57	0	0
	15	49	3	69	95	246	68	59	140	181							0	0	0	0	2	0	0	54	0	0
	28	42	31	56	49	272	15	80	222	263							0	0	0	0	12	0	0	40	0	0
	51	17	10	40	36	160	0	149	256	310							0	0	0	0	9	0	0	58	0	0
	94	10	2	19	103	166	0	152	260	326							0	0	0	0	3	0	0	55	0	0
	75	17	1	36	80	322	0	180	233	171							0	0	0	0	8	0	0	48	0	0
	46	34	30	29	70	356	7	155	218	304							0	0	0	0	7	0	0	52	0	0
	68	30	75	38	18	316	9	192	181	253							0	0	0	0	0	0	0	49	0	0
	87	19	80	6	87	242	22	87	103	174							0	0	0	0	14	0	0	49	0	0
	75	65	70	4	181	229	13	130	107	166							0	0	0	0	17	0	0	73	0	0
	109	77	51	5	199	198	8	129	168	142							0	0	0	0	27	0	0	83	0	0
	40	84	96	7	82	242	18	122	208	164							0	0	0	0	0	0	0	39	0	0
	15	68	9	1	28	180	3	76	301	122							0	0	0	0	38	0	0	14	0	0
	21	41	52	14	26	271	34	72	465	92							0	0	0	0	1	0	0	42	0	0
	24	119	96	15	63	511	135	88	428	86							0	0	0	0	0	0	0	65	0	0
	18	139	132	0	64	396	220	82	323	133							0	0	0	0	0	0	0	49	0	0
	80	152	31	6	210	303	346	94	396	40							0	0	0	0	19	0	0	92	0	0
	243	162	125	20	546	338	201	115	302	62							0	0	0	0	66	0	0	69	0	0
	277	184	113	29	729	336	107	77	222	62							0	0	0	0	39	0	0	35	0	0
	106	246	96	27	750	423	79	116	180	68							0	0	0	0	49	0	0	5	0	0
	43	225	60	6	765	363	107	98	321	15							0	0	0	0	42	0	0	12	0	0
	34	335	96	12	581	395	154	45	320	112							0	0	0	0	16	0	0	27	0	0
	77	317	91	50	482	325	194	26	246	41							0	0	3	0	10	0	0	51	0	0
	41	420	127	50	403	260	261	28	273	91							0	0	1	0	0	0	0	79	0	0
	36	384	172	95	259	230	162	28	297	6							0	0	0	0	10	0	0	76	0	0
	45	357	147	170	126	298	58	16	262	23							0	0	2	0	8	0	0	118	0	0
	12	271	179	196	162	328	92	5	176	53							0	0	3	0	39	0	0	120	0	0
	55	272	209	159	126	378	7	7	104	77							0	0	1	0	16	0	0	56	0	0
	89	310	315	87	237	472	53	0	245	100							0	0	1	0	15	0	0	28	0	0
	90	240	450	140	253	471	30	7	192	45							0	0	1	0	0	0	0	26	0	0
	33	22	457	180	245	438	214	5	137	31							0	0	0	0	2	0	0	69	0	0
	15	121	426	208	255	316	299	2	93	22							0	0	1	0	2	0	0	34	0	0
	6	104	423	253	255	312	271	1	216	65							0	0	0	0	6	0	0	130	0	0
	60	147	431	232	186	296	288	0	202	49							0	0	1	0	75	0	0	32	0	0
	83	221	245	269	106	202	490	0	169	2							0	0	0	0	125	0	0	26	0	0
	55	259	323	236	2	281	365	3	206	42							0	0	1	0	157	0	0	15	0	0
	109	296	488	232	16	184	319	0	123	15							0	0	1	0	145	0	0	40	0	0
	93	334	536	181	44	139	278	6	85	27							0	0	0	0	168	0	0	30	0	0
	73	225	554	116	41	141	278	9	115	137							0	0	64	0	107	0	0	4	0	0
	52	201	443	1	18	189	226	1	130	84							0	0	114	0	124	0	0	10	0	0
	46	250	429	72	58	150	291	81	193	92							0	0	17	0	121	0	0	2	0	0
	31	297	330	62	51	104	385	13	187	108							0	0	14	0	84	0	0	8	0	0
	20	237	311	49	88	168	173	17	131	112							0	0	143	0	85	0	0	1	0	0
	2	217	263	169	88	142	95	52	107	97							0	0	11	0	87	0	0	2	0	0
	22	186	293	309	43	12	5	8	25	69							0	0	28	0	61	0	0	0	0	0
	18	118	278	271	1	21	73	39	64	117							0	0	1	0	43	0	0	2	0	0
	158	111	180	148	40	21	90	8	65	143							0	0	39	0	4	0	0	11	0	0
	230	153	273	35	16	48	111	3	48	108							0	0	62	0	10	0	0	6	0	0
	307	154	328	59	4	37	141	5	58	119							0	0	12	0	25	0	0	5	0	0
	156	84	299	21	46	44	75	14	32	89							0	0	10	0	20	0	0	0	0	0
	319	64	247	3	79	54	162	19	9	103							0	0	86	0	106	0	0	0	0	0
	408	90	268	6	56	51	156	7	26	199							0	0	24	0	180	0	0	1	0	0
	225	105	185	4	19	95	220	28	51	198							0	0	57	0	130	0	0	10	0	0
	225	88	199	57	27	218	168	8	79	211							0	0	2	0	63	0	0	7	0	0
	266	20	176	249	14	197	466	0	41	160							0	0	82	0	112	0	0	2	0	0
	278	38	135	352	28	159	333	5	38	163							0	0	1	0	93	0	0	9	0	0
	280	134	144	177	114	284	484	8	87	228							0	0	1	0	80	0	0	0	0	0
	160	186	189	209	29	307	376	6	31	273							0	0	20	0	55	0	0	8	0	0
	192	127	94	287	11	359	387	98	52	287							0	8	33	0	35	0	0	0	0	0
	219	230	171	170	69	289	435	47	93	240							0	0	12	0	18	0	0	0	0	0
	410	150	196	175	62	427	396	12	52	280							0	0	24	0	13	0	0	0	0	0
	286	141	150	126	7	277	383	5	83	153							0	0	71	0	3	0	0	0	0	0
	248	89	150	29	28	629	302	15	52	133							0	4	38	0	41	0	0	4	0	0
	363	83	105	54	36	602	240	21	45	106							0	4	71	0	59	0	0	17	0	0
	254	76	118	144	116	660	131	1	95	107							0	0	10	0	39	0	0	2	0	0
	224	67	207	51	144	715	92	3	73	209							0	0	3	0	7	0	0	2	0	0
	169	94	224	58	108	680	75	0	97	149							0	1	4	0	4	0	0	16	0	0
	83	128	147	40	16	466	91	1	76	28							0	0	3	0	9	0	0	18	0	0
	57	28	191	10	100	266	117	0	67	23							0	1	59	0	12	0	0	5	0	0
	54	7	100	9	106	463	92	1	54	50							3	0	62	0	22	0	0	0	0	0
	135	42	86	31	61	447	49	6	69	47							0	11	30	0	0	0	0	15	0	0
	152	51	114	33	139	164	26	11	89	58							0	0	20	0	0	0	0	41	0	0
	118	3	80	43	143	152	19	4	74	164							0	1	10	0	1	0	0	66	0	0
	157	4	151	56	47	289	35	22	31	86							9	1	5	0	13	0	0	4	0	0
	215	3	201	102	74	126	93	116	101	32							2	0	19	0	27	0	0	0	0	0
	289	38	167	44	114	145	97	147	67	76							2	0	14	0	13	0	0	0	0	0
	243	3	129	24	220	148	194	75	62	91							12	0	3	0	18	0	0	0	0	0
	300	37	160	41	292	380	216	13	92	37							4	0	27	0	14	0	0	0	0	0
	302	2	164	10	269	404	217	193	43	164							0	0	23	0	8	0	0	0	0	0
	366	12	83	10	238	395	240	98	73	138							0	0	15	0	5	0	0	0	0	0
	299	14	34	6	148	309	182	44	93	175							0	0	17	0	0	0	0	0	0	0
	356	65	50	7	183	460	182	65	139	140							2	0	15	0	0	0	0	0	0	0
	442	3	68	10	159	358	161	33	85	120							12	0	15	0	2	0	0	0	0	0
	342	37	47	6	192	132	106	30	88	49							69	0	23	0	0	0	0	2	0	0
	356	11	224	28	232	280	83	39	50	58							10	0	69	0	0	0	0	0	0	0
	478	4	328	30	190	362	137	127	112	68							44	0	55	0	0	0	0	9	0	0
	575	15	70	6	81	398	209	120	72	139							35	0	49	0	0	0	0	0	0	0
	371	50	64	10	90	219	173	138	106	110							68	0	14	0	0	0	0	0	0	0
	404	16	19	2	145	123	179	154	86	54							13	0	41	0	5	0	0	0	0	0
	507	39	70	1	83	158	141	107	199	32							7	0	37	0	0	0	0	4	0	0
	380	20	53	2	155	124	155	147	141	69							19	0	35	0	6	0	0	23	0	0
	362	84	21	0	177	127	154	128	104	174							32	0	2	0	0	0	0	17	0	0
	238	170	13	0	221	150	83	73	92	149							48	0	7	0	13	0	0	18	0	0
	266	124	41	0	247	335	140	81	132	252							27	0	0	0	0	0	0	5	0	0
	217	62	36	0	198	296	56	124	55	258							16	0	5	0	0	0	0	0	0	0
	161	9	44	0	204	209	131	147	123	332							18	0	14	0	1	0	0	1	0	0
	296	59	92	0	359	399	112	128	85	307							68	0	0	0	0	0	0	7	0	0
	159	64	201	0	347	252	118	195	486	219							4	0	1	0	0	0	0	33	0	0
	99	534	1443	0	729	1049	164	187	927	112							792	0	10	962	0	19	1	22	0	0
	50	1089	1095	2	1196	1529	255	142	809	616							503	1663	3027	1835	563	330	1027	25	0	0
	88	934	687	288	1965	1184	249	96	1786	1339							925	1706	3357	1407	1618	45	1655	884	0	0
	94	1108	977	292	2144	971	188	251	1848	1065							1439	1630	2967	885	2181	125	2090	1670	0	1
	579	646	1762	215	1610	743	477	877	1353	1297							1571	1428	2570	1472	2248	71	1467	1126	316	429
	1431	654	1435	497	1335	690	704	1192	1170	1696							1720	1140	1475	1144	2756	155	1522	610	1486	951
	1422	864	1551	380	1380	584	1143	1366	1270	1656							1893	475	3002	726	2136	477	1454	612	2305	1087
	768	1211	2328	812	1884	1290	1401	849	1526	1349							1473	601	3904	613	1813	276	1010	856	1882	1390
	849	1104	2719	723	2007	2034	1451	524	1279	888							1389	1361	3962	401	2107	653	832	1110	1635	1873
	773	1280	2173	1183	2629	2495	1442	860	1069	437							1029	2258	2248	269	2515	547	358	1095	1334	2291
	1185	1927	2165	1708	3262	2018	2207	1413	1115	361							1207	3642	269	259	2294	551	788	400	1160	1528
	1465	1368	3123	1357	3206	2046	2904	1625	988	574							1341	3857	1002	338	2457	644	981	441	599	762
	1452	1267	2863	1535	2579	1517	2806	1665	1697	856							1573	2287	1450	120	2493	765	1420	681	425	500
	2016	2252	2668	1419	2593	1512	1707	1640	1783	770							1105	705	1871	294	1758	1043	1458	944	439	480
	1732	1285	1997	1220	2250	853	1340	1376	2224	600							904	1550	1093	405	1497	1269	1573	960	955	1731
	1511	1191	1275	701	1502	566	1014	682	3668	676							822	1989	1149	1071	1433	1568	2012	953	1239	1959
	1252	989	1328	439	1139	549	822	448	3963	745							693	1600	1279	1112	1606	1479	2009	1476	2017	1734
	719	687	1522	340	701	774	733	769	2807	602							489	1224	1133	843	1201	1432	1501	1539	2613	1359
	514	600	1389	501	810	450	1382	986	4660	452							744	790	1247	972	948	1732	1733	1489	2552	595
	648	667	851	701	854	442	1314	748	5866	738							778	724	1053	1217	1199	1401	1938	1249	2001	311
	563	634	956	643	874	410	1007	718	6200	1247							753	513	1087	1206	1992	989	1703	930	1315	346
	543	388	1086	657	613	921	848	577	3837	1023							500	691	954	1002	1896	1581	1574	579	1008	180
	453	582	1773	1174	995	1013	1269	527	2775	1193							683	421	975	859	2772	1228	1018	375	847	527
	957	481	2281	1378	671	677	1811	620	3242	853							483	333	1881	856	3356	632	1153	191	890	774
	1262	605	2917	1443	552	556	2051	838	2986	1273							365	379	2755	578	3284	354	959	175	849	1490
	891	874	3049	1758	1203	457	2907	1041	1708	603							766	556	2578	402	2985	395	1059	197	1307	1528
	1133	1234	3369	1918	2480	471	2486	641	1119	356							1640	827	2535	258	3757	467	1089	341	2087	1143
	1004	2234	2440	1569	3656	697	2950	967	1102	217							1802	1324	2843	228	2502	417	1117	488	2228	1009
	1245	2173	1719	641	4040	1490	2524	1395	554	615							1571	1345	2246	287	2978	635	976	310	2435	944
	2045	2285	1635	263	3781	2647	1887	1419	1301	704							1362	1555	1690	429	2677	761	1156	244	2707	1014
	2550	1738	1278	232	3036	2486	1553	1116	1693	758							1369	1543	1238	411	1982	501	1773	420	2291	2363
	2540	1075	882	580	2236	2030	1701	979	913	832							1449	1696	646	383	1271	328	2143	180	2134	2661
	1852	592	976	528	991	1385	1719	1180	618	650							1388	1408	610	395	914	170	2830	202	1449	1954
	1027	267	651	373	497	530	1264	1347	938	575							1326	807	530	374	1119	444	3041	871	1151	1881
	626	510	327	558	489	528	813	1158	648	222							1213	602	711	405	540	673	2729	1203	779	1591
	498	330	351	499	576	913	465	794	807	407							1878	734	430	241	794	576	2876	770	571	1410
	517	335	321	255	895	1284	592	757	838	306							1524	739	384	239	556	522	2336	887	235	836
	518	294	406	293	943	1089	464	949	921	256							1399	625	379	293	620	379	2196	585	536	962
	596	384	562	204	757	732	688	992	882	259							1280	551	297	227	648	305	1698	481	513	857
	591	363	536	230	876	470	883	1125	817	276							1143	773	324	189	792	224	1136	494	339	698
	502	374	431	238	993	334	961	885	951	344							1055	645	44	214	500	252	1285	875	201	931
	439	204	317	233	949	263	1009	652	888	260							1029	598	223	104	323	92	1332	1074	530	1033
	364	200	168	230	768	106	537	687	905	203							912	659	283	95	319	138	1047	1146	473	750
	264	70	247	262	537	68	870	397	778	227							794	726	209	87	280	211	697	1003	399	772
	221	267	265	306	527	97	592	299	721	186							833	548	167	71	236	133	972	287	290	1381
	218	106	416	276	556	31	345	462	347	311							739	464	206	46	296	181	410	136	369	1060
	259	105	518	281	707	102	103	433	529	135							461	255	119	92	163	204	999	12	270	363
	343	169	411	263	713	145	155	643	430	164							241	261	107	63	366	153	808	58	244	281
	398	44	367	231	636	125	134	564	246	158							528	280	344	36	420	168	366	94	124	171
	301	71	365	151	599	111	125	653	19	207							421	431	478	87	250	162	906	66	64	624
	84	114	316	39	525	76	235	548	71	138							129	331	369	44	75	176	915	161	100	808
	161	103	310	108	599	122	327	226	183	89							204	45	242	15	239	141	422	126	82	238
	173	79	258	92	421	170	507	519	188	134							166	54	377	43	213	111	258	117	64	394
	126	88	185	124	244	217	512	505	225	123							412	83	179	30	79	43	364	31	30	434
	140	14	273	151	283	190	644	310	235	148							259	205	321	76	148	105	440	67	37	117
	49	7	323	108	228	122	558	456	329	63							65	124	540	106	133	93	135	80	31	139
	105	37	374	211	223	56	272	789	421	44							171	190	381	102	156	93	218	55	19	160
	122	138	442	168	301	27	525	347	210	59							47	325	400	117	126	140	107	87	35	167
	175	37	318	208	198	7	471	623	228	110							106	165	224	114	138	119	181	73	33	47
	181	119	154	256	238	27	42	414	332	30							153	264	452	143	46	46	30	44	4	84
	94	75	195	255	249	20	192	439	472	118							161	162	588	167	92	58	100	160	6	153
	166	151	145	409	288	1	267	444	561	163							126	293	483	57	221	18	56	165	27	143
	114	118	213	398	163	28	378	593	452	222							112	151	451	95	286	56	175	134	63	79
	106	51	304	316	315	17	522	725	498	194							157	97	357	97	187	5	268	32	46	21
	150	100	325	179	342	18	508	610	599	152							192	194	413	11	180	4	103	136	32	7
	98	77	349	91	296	18	444	587	607	129							101	62	88	46	168	19	101	60	14	10
	38	86	255	149	237	1	101	624	638	87							58	40	124	65	163	20	146	78	14	0
	81	80	137	61	308	2	15	761	487	83							53	55	198	29	138	31	198	51	17	13
	76	156	112	61	341	67	57	558	311	210							42	10	174	18	148	17	51	94	14	17
	123	111	186	48	402	26	16	542	247	207							31	3	65	6	101	3	135	63	14	15
	156	35	65	97	374	52	106	631	184	220							52	94	257	7	112	22	0	55	46	4
	104	46	182	122	379	102	46	618	277	162							82	33	243	4	94	1	16	86	67	5
	153	79	161	34	270	64	3	380	297	93							126	38	368	7	54	24	63	22	48	6
	25	31	75	32	207	45	132	253	195	115							71	29	186	64	18	29	3	16	34	5
	143	59	98	14	176	34	61	253	82	76							42	47	315	24	13	47	34	29	53	4
	168	24	86	39	365	25	68	350	85	52							18	7	152	34	23	41	49	28	61	0
	134	71	235	23	347	78	75	438	4	51							132	36	97	29	13	22	3	59	24	0
	112	177	251	28	339	65	215	323	2	35							107	68	135	1	13	20	53	25	13	0
	98	184	108	100	374	111	363	366	53	82							92	80	240	11	25	15	28	0	26	0
	42	151	108	143	247	109	364	135	39	88							114	58	111	7	13	26	132	42	37	0
	66	116	173	93	125	17	363	258	15	49							159	72	301	3	22	38	159	21	37	1
	53	62	131	86	207	29	328	340	57	77							158	154	260	1	22	9	27	56	7	0
	72	77	60	22	126	2	255	389	152	74							72	319	252	0	5	12	58	21	25	0
	59	82	60	41	96	16	111	446	75	73							38	184	193	2	3	6	21	15	38	0
	16	81	44	36	171	0	94	263	122	87							55	105	311	3	9	4	65	6	47	0
	62	108	44	82	39	0	177	189	190	79							95	130	347	2	38	0	4	14	31	0
	57	23	110	70	214	2	351	325	167	120							65	232	295	6	33	0	34	36	4	0
	12	13	195	88	349	3	614	204	207	23							46	175	324	2	17	22	142	27	0	0
	14	17	91	111	485	118	461	318	201	61							85	97	485	3	14	35	28	63	8	0
	10	10	123	35	579	236	114	164	77	100							113	69	515	4	20	48	0	48	25	0
	0	37	132	42	625	99	38	158	41	115							168	138	439	6	16	26	0	48	10	2
	34	35	138	40	569	91	141	130	19	170							149	149	413	9	0	21	0	36	0	1
	107	51	69	81	475	90	56	188	82	125							143	32	311	75	1	10	15	34	0	0
	97	8	36	144	386	67	19	138	102	82							169	115	232	122	0	5	30	17	12	0
	69	4	22	109	324	67	41	175	22	126							106	122	242	53	5	39	0	13	9	0
	81	21	10	94	360	100	134	325	97	84							55	22	140	9	0	11	0	2	9	0
	32	7	2	107	453	181	156	199	0	59							85	27	198	42	0	17	32	27	2	0
	130	0	7	110	406	208	80	133	17	72							22	56	101	48	0	8	19	29	0	2
	90	9	23	108	385	199	112	150	45	42							51	14	182	42	1	33	10	75	2	15
	127	30	2	24	335	133	10	37	0	46							92	14	160	40	5	53	135	18	15	8
	128	27	19	70	236	122	106	186	0	83							138	88	222	5	0	59	70	15	12	24
	111	19	23	46	191	171	127	54	3	151							280	104	194	17	2	70	98	33	0	28
	67	117	13	71	189	87	50	28	72	105							264	22	153	6	2	46	3	0	1	16
	33	74	5	66	281	179	69	50	25	97							160	59	278	23	0	72	54	19	6	8
	2	100	35	75	325	159	82	18	92	73							194	55	273	37	5	23	8	9	18	1
	22	92	8	146	175	198	79	26	149	9							96	81	238	75	3	18	110	12	50	17
	1	123	4	143	244	328	199	112	384	30							57	106	311	60	0	50	3	16	41	7
	45	168	40	168	268	283	98	9	478	3							90	30	288	36	2	25	3	117	44	12
	56	110	67	165	102	208	171	34	405	15							100	44	471	47	0	33	5	121	21	8
	56	151	286	99	139	257	94	19	345	17							301	106	579	49	5	66	16	66	9	13
	22	177	279	34	75	221	25	153	382	35							306	108	485	46	0	43	24	153	54	18
	80	171	225	31	228	222	62	141	236	6							301	49	572	86	0	25	2	95	42	0
	123	189	216	27	287	136	79	35	166	23							180	72	549	39	2	50	84	40	114	10
	137	180	241	25	122	307	67	85	95	31							307	45	338	21	2	30	46	29	51	10
	96	110	162	23	111	220	128	71	60	18							253	65	460	17	0	34	8	57	19	11
	115	67	197	36	53	251	65	117	176	79							69	10	566	40	2	22	7	28	33	10
	87	46	182	70	44	230	107	115	294	64							97	8	442	63	0	15	0	37	19	1
	119	77	151	75	167	297	24	28	225	37							82	40	483	94	0	19	6	90	0	0
	60	13	253	92	146	280	59	12	341	43							75	12	707	102	1	57	0	99	0	5
	64	30	274	104	161	189	278	47	186	22							32	34	729	52	0	34	0	43	2	5
	32	2	39	118	252	261	959	57	80	29							19	5	594	53	0	16	0	43	8	0
	108	0	171	68	172	230	140	158	118	37							39	19	331	20	0	23	0	65	10	3
	80	19	40	46	63	216	208	55	23	12							117	3	223	94	0	32	0	167	4	18
	198	67	35	45	256	288	205	127	103	2							48	1	315	67	0	48	0	235	1	1
	191	33	204	28	141	243	76	59	143	1							48	9	199	24	0	45	0	221	0	2
	64	119	309	47	223	103	61	92	257	2							26	22	322	11	0	26	0	166	6	0
	19	80	268	31	325	195	7	0	167	1							27	11	115	29	1	7	0	122	17	2
	19	151	210	124	216	256	7	34	36	2							17	31	83	38	1	15	0	123	0	5
	3	146	197	132	249	212	3	35	0	0							10	108	215	94	0	19	0	137	0	5
	0	107	260	107	162	168	0	71	2	0							28	18	44	201	0	28	0	90	0	2
	0	157	254	157	230	136	21	20	96	0							61	42	120	168	0	14	0	97	0	6
	3	120	306	153	297	155	0	121	205	1							25	3	147	65	5	55	0	104	3	12
	5	106	277	159	382	292	39	63	140	5							15	4	102	81	0	3	0	120	0	7
	2	95	350	56	358	161	46	15	198	13							11	5	264	72	0	8	0	91	0	10
	0	25	302	198	230	110	16	26	201	64							10	16	434	69	0	13	0	58	6	1
	10	49	139	109	298	158	64	34	211	123							6	47	289	51	0	1	0	31	18	12
	0	32	120	217	209	214	107	38	297	165							36	39	152	59	6	17	0	38	17	10
	1	91	148	126	258	179	95	59	268	128							59	3	87	109	7	4	0	31	0	17
	3	56	120	101	221	181	173	0	170	116							63	42	156	109	8	18	0	23	0	10
	8	45	129	94	294	179	152	29	129	111							81	1	153	93	2	52	0	15	1	30
	16	102	135	103	372	306	53	21	210	56							37	116	179	112	8	7	0	34	0	13
	135	38	129	42	479	368	52	3	210	56							21	28	106	109	1	12	0	41	4	7
	170	20	159	93	455	184	87	65	80	66							35	38	148	82	12	7	0	89	7	7
	78	25	151	143	204	285	42	0	82	35							81	45	271	80	10	0	0	62	13	5
	30	2	178	117	116	316	42	6	75	120							62	0	269	105	31	7	0	109	0	35
	82	53	255	47	77	215	32	13	52	113							33	0	371	100	6	11	0	118	0	42
	88	116	204	87	129	138	111	0	13	58							30	34	446	98	9	13	0	35	0	20
	54	4	235	42	217	158	58	2	10	120							22	14	277	84	39	6	0	41	1	7
	61	47	258	76	205	102	4	1	15	137							20	16	115	115	33	5	0	83	4	35
	113	28	289	47	234	100	18	6	27	113							16	21	274	140	44	7	0	37	2	35
	146	6	480	66	286	114	4	2	35	58							55	10	170	179	68	0	0	50	0	38
	148	13	321	54	235	138	33	31	1	145							73	13	113	161	80	5	0	30	0	24
	84	76	253	50	230	56	9	56	4	118							170	32	314	87	40	11	0	34	0	33
	116	12	260	83	202	90	37	64	36	101							110	14	333	78	23	15	0	25	5	42
	102	54	215	64	201	54	49	73	0	114							80	31	193	36	23	5	0	80	9	24
	89	118	183	11	172	89	24	33	0	161							71	12	163	90	26	9	0	55	1	23
	125	29	198	22	97	151	44	63	1	134							94	53	154	60	4	20	0	225	0	57
	109	38	226	44	170	185	67	22	1	39							77	16	223	62	23	17	0	75	3	23
	105	29	194	90	234	219	60	27	9	9							99	10	435	49	46	28	0	164	8	18
	124	45	240	58	138	230	126	0	24	13							174	0	326	57	6	26	0	55	13	10
	40	12	235	61	188	235	61	6	2	24							151	86	371	46	10	23	0	74	2	36
	65	4	148	280	221	269	219	55	7	12							135	14	270	53	34	10	0	3	0	15
	60	2	150	276	117	195	237	15	13	14							145	7	337	74	97	7	0	23	0	21
	34	10	153	132	138	205	69	32	11	3							223	14	388	48	116	0	0	30	0	27
	77	25	50	77	140	262	57	2	1	3							203	3	278	95	25	2	0	1	11	11
	72	30	143	97	70	136	160	14	17	1							140	1	126	116	14	3	0	0	10	5
	74	5	88	108	45	47	38	8	10	1							136	0	95	93	86	2	0	0	8	14
	108	7	8	127	16	108	61	10	54	1							93	0	242	61	65	1	0	1	0	11
	69	9	5	104	58	132	162	0	26	0							58	25	191	49	34	1	0	1	0	8
	120	29	10	88	126	106	76	1	26	1							90	3	139	123	52	0	0	1	0	2
	120	110	1	74	64	89	54	23	46	0							73	0	125	160	19	0	0	5	0	3
	126	153	8	88	60	12	0	16	30	0							19	0	69	170	53	3	0	1	0	0
	85	84	3	50	11	160	72	39	20	0							14	2	100	144	34	6	0	0	0	0
	4	30	2	35	66	21	66	14	26	0							8	14	144	54	46	30	0	5	0	2
	40	84	1	150	113	31	38	62	17	0							4	2	183	63	7	3	0	2	2	3
	34	90	3	40	188	16	9	305	77	0							7	0	55	149	52	1	0	2	0	1
	57	95	2	101	240	65	33	200	85	0							2	0	102	108	15	12	0	3	1	1
	68	90	46	76	208	88	43	175	73	0							7	0	121	33	26	7	0	6	0	1
	15	43	110	63	284	45	94	212	65	1							13	0	65	66	30	2	0	17	0	0
	14	121	135	92	293	26	103	191	48	6							11	0	37	56	3	8	0	0	0	0
	19	138	164	107	163	25	44	251	6	0							36	2	80	158	35	0	0	0	0	0
	13	121	136	63	81	71	15	140	9	0							89	5	411	271	13	5	0	0	0	0
	52	49	75	55	45	12	170	318	1	0							94	0	353	183	26	3	0	0	0	0
	27	39	36	35	36	28	47	409	0	0							94	5	259	145	17	7	0	0	0	0
	23	91	21	37	68	28	9	439	58	0							81	1	530	69	39	0	0	0	0	0
	8	95	27	7	61	28	102	317	47	3							138	0	251	163	14	0	0	0	0	0
	19	220	54	22	72	22	163	307	21	1							136	0	267	141	20	0	0	0	0	0
	49	305	227	14	102	36	3	353	157	2							138	0	393	57	36	1	0	3	0	0
	29	217	132	11	101	4	104	387	194	71							30	0	577	77	36	0	0	2	0	0
	2	148	154	31	30	9	164	352	116	125							21	0	415	72	25	2	0	0	0	0
	10	150	162	5	118	3	272	328	95	120							30	3	241	50	23	1	0	0	0	1
	8	96	51	13	166	8	284	345	115	54							19	10	383	89	68	0	0	0	0	3
	12	56	53	0	127	1	131	362	45	120							199	34	288	116	4	0	0	0	2	1
	1	65	114	0	174	10	76	326	139	150							202	97	360	139	18	0	0	0	0	6
	25	27	188	28	59	1	132	326	107	87							262	86	328	228	12	1	0	0	0	0
	19	90	102	58	87	1	9	325	47	145							85	46	475	105	28	0	0	0	0	0
	18	19	38	44	96	1	30	254	75	149							355	82	474	137	38	0	0	4	0	9
	24	31	74	79	87	0	65	164	88	161							216	55	338	156	21	0	0	6	0	85
	8	34	60	113	90	2	13	197	144	152							127	19	389	167	7	0	0	1	0	56
	8	6	96	45	60	1	31	257	149	108							93	6	361	172	26	1	0	18	0	4
	8	33	138	77	173	0	24	245	126	11							97	47	707	132	75	0	0	22	0	38
	2	82	106	28	215	4	1	228	152	47							119	38	363	62	154	0	0	14	0	29
	8	16	68	53	64	23	575	420	173	86							208	50	187	52	104	0	0	7	0	2
	0	52	136	69	97	106	299	103	90	138							276	60	184	17	43	0	0	6	0	0
	0	19	161	57	107	157	222	193	105	141							237	85	170	72	36	0	0	0	0	11
	2	105	68	63	80	109	161	170	120	154							210	36	266	136	27	0	0	7	0	128
	5	28	139	68	79	100	141	181	141	196							110	14	291	80	18	0	0	6	0	61
	0	15	127	44	131	98	56	238	150	192							174	18	393	93	0	0	0	1	0	7
	57	41	53	9	107	102	66	104	135	171							229	13	442	119	8	0	0	2	0	37
	70	76	68	15	114	124	80	68	237	149							235	15	375	108	19	0	0	3	0	11
	8	4	131	11	99	25	141	79	217	103							192	7	300	115	8	0	0	2	0	5
	52	18	179	55	64	69	95	29	156	191							90	31	338	126	30	0	0	9	0	2
	111	21	93	27	80	38	147	8	68	219							180	55	380	151	10	0	0	2	0	0
	63	9	222	12	21	118	167	48	76	142							249	32	353	113	16	0	0	9	0	1
	95	9	181	39	145	60	53	92	86	118							153	33	357	91	23	0	0	17	0	11
	120	18	102	50	211	122	8	41	140	118							146	21	216	38	40	0	0	8	0	19
	67	1	135	42	82	135	12	54	65	93							90	23	162	29	18	0	0	10	0	60
	102	18	109	34	129	80	24	148	51	184							29	44	136	12	70	0	0	12	0	58
	92	5	118	60	194	148	13	51	49	189							64	58	169	9	46	0	0	2	0	15
	58	0	181	34	221	98	3	39	39	150							64	3	110	38	9	0	0	1	0	4
	56	1	100	6	165	23	23	56	14	181							30	32	249	45	83	0	0	20	0	4
	11	12	162	21	51	35	42	3	4	119							136	24	53	69	62	0	0	28	0	0
	21	3	236	12	68	116	7	12	25	49							87	32	164	67	18	0	0	30	0	2
	4	21	285	16	61	212	13	7	56	110							33	18	154	48	90	0	0	37	0	11
	2	35	263	19	56	228	21	98	4	54							69	12	267	42	71	0	0	28	0	0
	57	39	191	13	104	274	18	5	0	101							67	17	249	42	6	0	0	12	0	7
	22	41	344	12	106	383	4	46	0	63							122	2	272	23	52	0	0	3	0	12
	3	90	159	37	31	316	11	18	0	28							116	8	287	33	31	0	0	0	0	2
	36	61	190	23	28	147	0	32	5	46							151	0	191	19	21	0	0	0	0	1
	35	73	80	11	26	35	6	25	21	37							125	26	312	35	43	0	0	0	0	10
	23	70	148	0	122	63	2	8	1	35							160	5	228	49	3	0	0	6	0	3
	96	62	119	6	82	126	0	111	7	2							166	0	183	36	41	0	0	0	0	6
	100	102	149	0	84	119	2	215	11	19							240	9	341	142	44	0	0	0	0	10
	33	30	185	0	79	173	11	113	0	15							198	0	427	92	2	0	0	0	0	0
	80	39	153	1	90	194	5	32	0	33							230	0	426	66	32	0	0	0	1	2
	121	65	113	32	25	260	0	55	0	82							236	0	465	82	10	0	0	0	0	8
	137	39	115	49	27	261	0	24	0	23							324	9	385	84	41	0	0	0	0	0
	65	82	123	92	42	221	5	17	0	94							477	0	238	149	49	0	0	0	0	23
	12	125	107	191	35	237	0	73	0	18							340	0	369	172	14	0	0	0	0	7
	8	112	77	129	31	314	5	21	1	23							84	0	264	121	37	0	0	0	0	0
	6	14	137	202	14	379	0	63	1	37							99	0	157	53	25	0	0	11	0	12
	0	29	74	176	38	449	0	1	0	16							131	0	236	84	6	0	0	4	0	6
	2	111	107	44	2	432	0	0	0	74							80	0	349	23	11	0	0	3	0	2
	3	127	40	76	17	397	7	8	0	117							96	0	187	121	4	0	0	0	0	0
	0	104	22	132	7	524	2	13	0	37							118	0	83	213	20	0	0	0	0	6
	4	119	43	39	11	521	3	20	0	40							73	0	167	89	2	0	0	9	0	1
	9	40	30	63	226	536	0	58	43	119							56	0	69	46	2	0	0	0	0	1
	0	18	33	135	513	506	115	144	169	164							77	0	357	83	2	0	0	1	0	8
	2	58	33	28	472	503	60	151	277	150							18	0	254	52	0	0	0	0	0	6
	3	53	18	77	327	572	56	163	207	168							12	0	55	60	1	0	0	0	0	15
	6	4	23	56	316	514	23	57	152	153							5	0	11	142	0	0	0	1	0	28
	0	33	6	18	176	574	44	47	132	63							4	0	228	184	0	0	0	0	0	17
	8	3	33	27	130	429	48	24	147	81							10	0	443	144	0	0	0	0	0	26
	201	14	8	62	134	287	47	58	86	134							18	0	488	161	0	0	0	3	0	2
	305	6	12	53	159	537	47	43	211	98							18	0	285	228	0	0	0	0	0	14
	269	7	23	27	126	488	65	30	204	114							21	0	267	139	0	0	0	0	0	1
	174	2	15	69	40	365	36	92	130	116							120	0	181	118	2	0	0	6	0	4
	165	0	49	48	45	181	0	108	173	61							134	0	66	159	0	0	0	10	0	3
	190	0	123	54	66	323	2	67	230	128							92	0	155	196	0	0	0	2	0	10
	183	12	137	120	124	314	9	43	152	167							47	0	227	195	0	0	0	3	0	3
	96	25	102	133	172	224	2	72	144	133							94	0	70	210	0	0	0	8	0	4
	105	4	83	33	138	132	0	37	145	231							91	0	18	315	0	0	0	1	0	4
	170	54	77	29	139	42	6	56	158	228							57	0	62	206	0	0	0	0	0	0
	203	32	28	58	139	132	10	36	135	253							14	0	124	159	0	0	0	0	0	1
	120	39	82	58	207	123	3	65	186	244							21	0	145	259	0	0	0	0	0	10
	136	20	42	27	156	91	6	44	170	160							9	0	126	155	0	0	0	0	0	0
	126	31	28	29	196	80	0	10	172	126							3	0	122	32	0	0	0	0	0	1
	141	50	56	93	99	70	0	18	122	173							28	0	89	118	0	0	0	0	0	8
	192	119	92	95	68	7	3	8	175	90							141	0	190	91	0	0	0	0	0	120
	227	20	18	137	122	2	2	27	98	91							157	0	338	70	0	0	0	0	0	99
	278	38	56	82	94	41	2	0	118	1							87	0	209	57	0	0	0	0	0	0
	278	24	82	192	123	0	0	0	111	123							23	0	297	60	0	0	0	0	0	0
	194	12	27	30	177	36	1	0	48	77							21	0	115	71	1	0	0	0	3	0
	173	11	20	141	156	47	2	0	66	203							53	0	79	4	1	0	0	0	0	8
	195	20	20	167	165	132	4	0	34	266							22	0	76	64	1	0	0	0	0	8
	108	22	3	205	180	62	4	0	56	90							15	0	152	65	0	0	0	0	0	11
	164	11	28	105	81	184	2	0	104	159							28	0	216	30	0	0	0	0	0	15
	168	1	49	197	176	117	0	0	45	197							55	0	106	53	0	0	0	0	0	34
	74	14	98	21	231	35	0	0	55	23							16	0	225	114	1	0	0	0	0	120
	55	43	111	163	252	52	0	1	140	119							12	0	89	51	0	0	0	0	0	52
	4	23	90	27	289	3	0	0	158	160							24	0	113	35	0	0	0	0	0	6
	11	8	41	4	104	5	0	2	172	29							0	0	157	32	0	0	0	0	0	41
	24	29	42	44	29	4	0	1	209	151							14	0	184	1	0	0	0	1	0	4
	43	7	48	31	39	38	0	0	254	169							52	0	148	31	0	0	0	0	0	3
	13	7	88	56	111	14	0	0	166	41							52	0	292	12	0	0	0	0	0	0
	28	8	73	49	47	3	0	0	97	125							30	0	252	27	0	0	0	0	0	0
	83	3	28	32	21	6	4	0	43	172							17	0	228	6	0	1	0	1	0	4
	6	17	47	5	4	6	0	2	56	147							30	0	173	18	0	0	0	3	0	2
	1	1	133	87	4	6	0	4	88	201							1	0	46	17	0	0	0	0	0	0
	36	10	83	140	0	2	0	56	17	172							3	0	13	55	0	0	0	0	0	0
	48	18	76	103	33	12	0	88	151	112							2	0	4	87	0	0	0	0	0	0
	0	0	43	24	71	2	0	68	80	143							1	0	95	52	0	0	0	0	0	1
	33	11	51	14	182	0	1	67	0	124							1	0	59	40	0	0	0	0	0	0
	13	22	97	63	350	0	0	47	31	165							0	0	63	16	0	0	0	0	0	0
	32	10	73	35	308	0	0	39	57	87							0	0	206	20	0	0	0	2	0	0
	46	33	180	7	299	2	5	29	12	189							0	0	67	18	0	0	0	0	0	0
	91	34	191	6	291	0	3	14	1	149							0	0	179	39	0	0	0	2	0	0

## Sheet: Motion traces_tone test
ToneTest_G4_Trial1																ToneTest_G6_Trial1
	Mouse 1	Mouse 2	Mouse 3	Mouse 4	Mouse 5	Mouse 6	Mouse 7	Mouse 8	Mouse 9	Mouse 10							Mouse 1	Mouse 2	Mouse 3	Mouse 4	Mouse 5	Mouse 6	Mouse 7	Mouse 8	Mouse 9	Mouse 10
	180	48	136	2	1394	35	504	15	1387	131							91	6	25	113	497	402	353	8	15	138
	96	25	0	0	1484	46	446	35	1183	143							111	53	31	56	467	300	172	2	10	86
	107	41	26	0	1480	45	364	31	898	5							103	11	91	27	464	347	93	33	8	194
	116	49	31	5	1390	9	284	28	688	87							262	11	164	48	399	297	95	21	37	294
	46	121	22	3	1188	17	203	52	937	46							479	5	136	48	660	185	104	46	14	248
	55	29	168	7	984	15	53	38	948	32							483	33	41	50	641	276	311	121	3	103
	75	40	133	43	816	42	54	59	997	72							622	14	22	46	484	293	325	123	19	107
	56	51	13	54	640	54	174	30	930	163							653	66	23	91	442	309	370	101	2	50
	39	63	44	34	684	71	257	53	841	323							696	32	9	91	517	306	383	122	9	61
	12	48	164	68	668	69	251	117	673	354							869	26	13	125	543	176	247	96	26	69
	25	91	53	109	610	156	218	120	575	250							778	52	10	4	474	377	375	75	2	171
	53	75	75	120	671	167	343	237	520	249							659	9	0	104	308	486	436	89	19	236
	46	205	211	175	693	170	419	173	186	225							424	11	9	51	409	267	320	44	7	238
	39	59	73	127	784	278	356	102	583	236							537	128	8	44	413	212	327	45	13	305
	48	36	296	221	193	264	215	65	625	114							539	114	53	49	305	280	306	45	24	319
	31	10	161	331	352	326	181	50	837	7							623	45	11	19	257	336	490	24	0	455
	24	38	71	301	610	217	221	82	847	187							839	79	14	71	248	341	734	19	22	593
	67	24	171	228	839	295	316	127	744	186							659	63	32	41	94	453	805	19	20	732
	28	10	42	174	934	346	172	74	459	125							418	70	22	37	99	347	689	14	1	914
	41	49	185	132	982	206	375	55	711	307							536	120	7	2	111	337	727	37	23	972
	85	81	136	203	1133	203	301	84	1229	212							699	151	63	50	86	519	747	33	0	934
	32	53	79	250	1081	246	216	53	1542	252							579	120	124	26	70	514	684	29	19	926
	33	247	172	311	909	282	221	122	1673	272							622	105	131	180	30	421	620	5	11	896
	67	266	17	383	1290	335	220	124	1730	307							445	142	22	103	2	546	732	6	20	751
	28	248	70	310	1633	380	174	104	1772	264							229	125	13	41	64	558	683	84	23	610
	44	282	28	158	1551	341	249	95	1654	269							473	169	81	54	73	618	591	81	0	536
	67	226	14	241	1736	250	115	141	1418	320							620	93	26	25	76	358	475	30	30	384
	42	223	2	212	1323	278	136	113	1643	337							590	187	80	15	18	237	376	55	16	306
	47	247	14	377	487	400	24	238	1677	360							667	262	31	48	33	282	315	63	19	488
	47	352	50	483	521	306	69	240	1387	631							707	207	56	39	23	266	348	42	25	606
	15	217	6	508	713	319	101	147	1306	690							522	153	75	39	40	199	527	57	0	638
	45	355	6	388	903	321	93	84	1447	775							452	205	43	52	134	215	772	61	21	669
	35	367	10	513	1208	311	32	65	1450	820							189	267	9	54	100	102	724	45	56	721
	31	513	11	422	1412	301	122	141	1287	628							263	311	17	39	116	21	294	2	44	598
	30	536	9	499	1389	277	213	95	1077	500							487	263	11	41	69	39	496	45	22	432
	39	350	13	602	1296	341	470	153	1032	542							610	217	17	37	85	86	528	3	14	436
	7	258	2	515	1206	379	482	94	986	522							625	86	64	83	4	152	754	88	17	222
	47	262	19	553	1071	311	397	10	1161	517							571	202	20	110	84	111	679	18	34	196
	39	273	53	638	1218	261	495	15	1131	497							227	404	16	33	37	203	636	45	13	416
	6	267	18	712	1352	268	535	13	938	376							307	303	16	0	92	221	554	89	27	444
	3	280	5	623	1359	302	500	41	1039	558							515	254	0	63	78	121	503	106	6	415
	15	177	25	629	1416	244	386	50	1058	647							979	379	10	30	23	145	572	97	27	423
	19	221	31	524	1683	117	242	31	785	502							1363	270	3	42	7	237	439	78	11	497
	81	215	70	438	1685	143	138	117	1004	374							1178	179	3	21	4	329	792	60	23	517
	45	34	73	570	1627	166	255	162	657	282							961	142	0	34	56	449	658	46	18	373
	46	134	77	467	1240	160	279	151	446	227							791	103	11	1	103	377	541	27	2	269
	75	214	26	452	1338	105	173	70	422	71							466	176	21	0	112	386	477	18	24	455
	34	312	42	362	1256	218	200	38	153	214							219	186	10	28	35	234	349	17	0	511
	83	414	18	233	1656	248	354	68	160	137							209	147	11	54	35	265	347	8	32	439
	60	288	5	199	2071	253	406	49	325	152							211	175	15	10	14	295	606	0	33	560
	37	181	24	56	1709	261	295	110	238	66							177	182	13	0	62	181	782	7	15	635
	62	174	12	124	1351	207	217	65	113	148							154	316	0	16	14	149	542	0	27	846
	32	195	11	160	1130	207	236	13	84	202							137	250	13	77	58	149	575	2	11	603
	57	164	25	90	1152	237	123	8	113	120							323	236	3	15	55	206	531	30	17	275
	58	163	1	138	971	154	247	10	189	142							475	220	5	55	23	255	431	3	15	265
	42	41	6	37	1234	125	278	18	408	222							366	177	1	4	109	141	549	17	27	547
	45	60	1	39	1369	184	252	23	377	415							295	109	2	32	120	143	482	9	14	532
	135	46	26	18	1568	56	448	29	305	402							274	194	0	38	22	199	462	4	81	664
	94	8	6	176	1436	25	368	11	404	454							491	145	8	52	37	117	327	18	3	799
	63	14	0	4	1077	63	462	66	131	461							717	118	1	13	122	27	69	1	39	931
	61	73	0	122	871	31	497	53	370	521							899	158	0	18	84	95	129	26	11	1038
	13	10	0	1	800	49	393	66	50	560							704	349	12	25	79	14	472	11	0	992
	115	30	38	4	959	164	256	16	298	359							506	256	6	99	26	108	501	51	40	826
	42	9	83	68	1250	43	111	19	189	484							697	433	8	204	21	28	603	7	26	998
	51	35	57	34	1369	151	76	39	78	735							809	397	1	121	1	25	371	6	82	1167
	49	75	28	27	1089	115	66	17	55	797							717	181	0	71	4	77	301	13	8	1209
	51	10	32	26	791	52	208	69	44	798							300	235	1	37	4	69	190	0	33	1178
	73	4	0	37	885	129	361	36	148	756							132	218	1	47	0	120	218	21	11	1079
	33	36	0	18	762	230	407	147	420	685							389	294	1	166	36	52	182	20	10	1237
	60	41	0	6	894	200	324	95	429	685							266	264	22	137	10	36	275	1	12	1470
	33	78	2	132	1137	87	181	83	240	723							276	334	280	69	12	36	285	23	28	1301
	87	202	0	178	1182	39	137	109	176	656							493	1071	365	41	5	23	170	6	60	1355
	53	243	0	165	895	147	142	11	135	635							640	1369	468	105	0	31	118	1	63	1493
	36	357	34	128	774	45	97	158	166	540							866	1246	514	65	1	32	298	17	13	1530
	47	456	19	84	792	141	128	44	283	526							523	1065	432	38	11	23	376	8	13	1231
	23	576	2	137	814	197	264	70	131	603							595	792	263	127	8	12	364	4	8	1313
	28	564	96	26	832	287	317	74	104	877							839	571	128	23	9	47	247	8	0	1451
	64	580	87	50	712	251	236	85	20	963							947	432	77	33	0	46	223	45	3	1218
	36	536	56	56	1255	243	146	135	45	853							1181	206	128	6	18	58	304	133	0	1133
	56	509	57	109	1151	283	150	31	84	883							1069	147	226	59	25	93	140	99	6	826
	54	435	31	24	1126	234	171	153	242	1053							904	214	267	63	1	37	83	59	1	884
	16	345	57	1	1246	272	223	156	139	1065							671	165	268	73	0	77	102	68	1	1002
	31	236	84	30	1213	230	340	91	93	1032							764	157	235	66	6	2	308	89	47	1239
	36	169	35	145	1341	133	307	199	201	1010							825	112	98	46	15	12	66	117	1	1089
	61	132	50	715	1144	140	194	75	213	1078							487	43	49	47	70	8	81	90	27	1167
	27	133	53	1046	1166	57	201	143	51	1060							869	129	66	33	10	43	101	81	31	1341
	41	87	23	1057	847	86	135	112	11	1053							1067	355	30	25	7	3	5	33	2	1153
	14	16	4	833	537	49	178	149	27	857							1110	375	25	32	77	6	78	80	0	940
	30	18	0	824	643	184	224	130	94	672							1319	248	79	29	288	7	13	30	12	910
	12	36	0	913	712	232	302	74	65	807							1318	235	77	82	334	4	62	42	5	933
	31	20	0	907	1059	94	396	158	62	642							1030	316	34	68	302	11	95	51	12	899
	81	39	0	677	1285	121	309	78	145	823							933	652	41	19	322	40	21	57	45	762
	77	92	2	618	1043	115	469	220	10	876							1077	913	31	55	323	6	33	60	2	635
	82	160	1	398	940	207	368	141	86	982							884	886	5	20	318	25	22	10	17	374
	52	225	0	369	990	37	596	143	55	713							696	829	12	37	317	0	14	43	25	448
	95	361	0	537	844	17	409	196	89	414							204	850	25	20	186	5	9	47	14	349
	40	268	0	628	787	59	369	97	87	64							225	951	66	58	308	6	45	50	35	227
	89	105	0	260	1092	10	408	186	7	280							285	629	4	2	339	2	31	78	1	319
	70	208	0	248	1828	8	346	23	32	397							303	630	16	5	406	32	15	110	30	410
	67	144	39	26	2428	1	518	157	24	497							367	577	22	133	417	12	4	40	3	380
	20	123	170	27	2145	15	689	166	45	436							370	697	85	294	491	44	54	25	14	355
	94	186	104	182	1848	6	486	142	326	382							162	764	38	391	420	37	12	47	16	388
	30	235	135	193	1762	1	382	133	361	458							86	847	10	347	181	398	18	37	0	413
	36	251	129	268	1592	8	254	141	437	427							135	855	13	246	122	821	80	51	12	518
	25	100	86	281	1494	13	262	82	381	566							24	744	15	230	144	760	30	42	0	247
	53	54	106	247	1403	6	477	39	590	568							42	715	46	165	146	631	10	65	10	304
	48	70	111	248	1600	4	269	21	480	697							67	830	19	115	202	804	44	67	72	239
	58	43	90	325	1442	1	418	32	418	733							27	802	43	145	224	880	43	111	26	254
	133	172	62	348	1476	1	401	35	312	461							11	621	175	44	44	705	52	73	25	229
	77	74	52	368	984	0	238	5	112	344							59	712	328	24	180	549	8	40	3	235
	125	19	5	129	980	0	220	0	167	430							94	723	229	103	262	359	1	22	0	160
	65	7	10	54	1146	0	250	0	215	771							2	592	156	282	289	305	25	110	8	194
	131	83	3	111	1321	0	371	3	294	924							17	500	72	235	239	344	7	79	128	251
	43	187	0	44	1371	45	233	2	339	1079							5	399	203	193	96	210	1	18	207	180
	68	79	9	20	975	135	200	0	411	689							43	338	244	202	88	122	7	53	116	249
	92	23	39	8	1329	194	259	0	685	316							58	240	205	221	59	137	24	83	127	175
	52	45	5	10	1497	161	257	0	820	384							59	198	292	340	146	48	27	117	56	298
	33	42	8	5	1128	142	91	0	705	538							17	143	140	402	175	68	309	91	20	205
	51	21	0	4	1293	148	77	0	815	301							47	109	5	359	210	80	849	170	81	307
	77	122	3	37	1210	107	112	0	974	343							27	45	1	250	130	31	828	190	61	230
	32	84	33	98	1425	121	23	12	1055	533							89	37	2	322	26	28	887	97	13	168
	68	36	109	114	1121	90	1	102	806	393							100	22	11	343	31	73	1052	45	56	64
	89	23	53	15	1666	131	71	149	722	325							141	31	12	167	35	74	1373	102	135	319
	53	53	60	6	1823	124	30	156	743	512							92	35	8	154	33	191	1399	46	55	352
	57	61	39	5	1425	145	11	82	627	843							85	9	89	88	35	95	1261	71	26	306
	51	55	59	23	1049	85	35	26	524	873							77	79	234	55	84	84	1308	95	58	425
	78	53	219	161	897	23	0	73	386	582							209	38	54	44	182	55	1139	155	7	288
	69	61	381	21	980	74	0	90	538	462							215	1	12	126	177	90	747	29	22	316
	16	80	482	99	725	63	33	71	433	392							272	64	34	225	336	222	755	60	48	367
	62	138	639	248	601	80	75	137	344	297							379	87	0	293	494	210	670	193	23	91
	49	126	671	248	456	85	90	77	423	275							575	135	0	347	557	154	495	93	4	152
	35	106	787	14	241	73	67	53	406	180							728	34	33	179	513	148	475	50	48	110
	21	39	779	66	295	66	255	45	468	322							796	6	212	234	570	254	600	95	58	68
	55	124	802	9	299	136	197	52	401	179							746	79	282	206	477	156	563	164	45	189
	23	72	1024	13	363	171	154	36	310	130							677	55	361	132	280	131	273	157	6	258
	10	13	875	73	438	169	184	82	432	38							859	40	449	276	267	193	105	137	0	232
	42	20	314	235	443	136	152	54	394	0							918	38	313	259	260	111	165	150	1	326
	51	16	464	205	418	284	203	96	289	1							879	44	398	175	255	109	192	160	13	142
	78	20	234	146	265	228	69	162	219	100							719	10	547	264	233	86	222	155	66	160
	97	121	289	151	355	181	29	42	276	165							455	10	534	188	116	53	174	167	10	198
	152	143	433	114	262	282	81	42	312	292							442	8	579	175	134	131	177	228	4	266
	52	17	366	83	216	308	168	71	428	291							413	18	710	382	45	169	84	132	1	68
	74	144	313	32	188	267	56	49	420	115							447	6	690	389	19	204	168	162	33	158
	61	269	278	13	115	229	293	50	258	154							333	41	775	368	90	164	348	124	0	170
	80	184	311	1	258	356	718	113	353	231							213	0	819	373	70	83	471	59	17	172
	80	140	164	0	312	302	844	62	281	237							227	10	777	319	129	167	560	158	30	212
	91	163	168	1	158	165	721	121	331	107							202	17	647	428	187	147	547	121	1	171
	80	96	191	0	205	173	655	169	53	182							275	8	540	401	65	101	636	91	15	216
	63	150	209	0	238	113	452	44	311	206							299	30	539	243	134	139	801	162	2	120
	76	148	195	0	378	177	584	21	413	32							304	2	438	405	105	145	865	109	14	105
	34	68	431	0	230	148	537	118	624	21							106	6	534	357	110	119	909	78	16	98
	13	133	663	15	173	164	469	94	656	123							199	1	732	279	119	175	1001	132	4	174
	67	129	1012	8	393	309	449	101	386	152							284	23	958	257	42	184	1136	116	17	125
	66	209	1365	0	385	364	302	156	154	107							244	63	1402	189	16	190	1193	96	0	138
	64	245	1395	6	696	357	202	36	219	174							548	7	1352	190	17	200	1137	92	35	209
	35	228	1157	5	685	330	205	96	157	198							903	40	1111	222	52	50	1323	117	107	149
	51	222	875	0	1011	213	229	3	220	69							1057	0	1248	187	34	85	1404	62	252	114
	72	143	770	0	1306	256	203	9	464	49							953	108	1281	110	69	139	1477	103	364	131
	33	51	807	0	1494	323	117	36	484	0							755	13	1325	98	113	148	1615	148	222	163
	101	98	705	0	1580	360	45	49	364	44							324	22	1508	167	107	164	1687	102	114	312
	69	50	1058	0	1368	241	47	11	261	20							489	48	1239	215	89	99	1974	103	116	303
	147	67	1147	0	703	128	92	76	206	14							564	4	1030	94	152	65	2241	226	57	250
	141	48	805	0	753	88	80	160	131	7							463	3	686	107	134	31	2408	285	14	97
	133	41	364	0	991	58	70	249	115	0							266	2	760	183	45	57	2054	224	37	111
	87	28	153	0	893	46	125	334	119	26							146	1	886	271	124	21	2163	145	29	202
	94	58	280	27	838	83	109	336	472	255							87	0	867	309	123	16	2158	182	189	366
	128	82	203	120	787	90	51	298	627	644							179	6	701	268	4	90	2359	100	130	229
	105	30	306	67	722	18	65	264	718	732							288	5	589	242	29	83	1697	156	81	106
	77	18	300	104	449	16	17	315	886	645							449	17	504	214	22	67	2034	122	119	262
	72	47	362	46	428	9	61	340	661	551							630	22	658	221	13	111	2080	126	61	285
	116	34	427	12	329	0	44	375	450	604							823	18	802	261	32	132	2011	241	43	300
	22	83	170	38	282	0	14	311	482	452							1031	59	662	290	19	84	1555	187	97	452
	22	11	83	22	361	1	57	177	604	229							1037	52	732	417	17	54	1963	130	28	331
	131	4	382	75	235	5	94	102	529	342							859	75	905	518	7	75	1656	172	82	92
	62	34	511	122	130	34	212	58	339	357							718	197	1447	520	26	37	1189	127	66	112
	63	3	430	57	18	209	261	77	189	266							642	136	1589	610	56	61	1235	91	28	373
	44	25	666	16	18	148	159	112	207	347							643	120	1670	400	7	131	1436	283	83	545
	61	31	845	7	125	194	129	63	324	384							563	186	2075	276	44	174	1150	231	113	555
	186	11	989	0	517	239	112	47	465	262							888	210	2504	421	57	191	1175	228	141	696
	138	2	1045	2	760	267	46	23	608	242							668	239	2507	163	0	178	1338	118	66	490
	73	0	1110	7	874	280	64	58	680	422							565	191	1901	341	68	158	989	98	52	361
	61	18	965	11	739	262	81	118	769	243							538	193	1800	390	53	129	1649	118	44	363
	111	7	794	3	774	294	48	163	743	313							522	138	1586	414	49	221	1802	194	6	290
	103	61	818	52	903	341	54	195	579	470							268	216	1586	237	39	437	1516	128	71	303
	57	108	907	0	785	314	44	214	609	340							314	237	1736	68	25	610	1523	284	54	174
	121	79	876	7	692	172	43	69	678	356							388	160	1667	159	46	629	1198	270	130	140
	62	20	672	0	824	94	32	43	838	273							292	298	1484	115	3	459	850	305	169	200
	51	3	173	2	857	85	123	83	676	226							514	305	1519	117	66	344	851	233	167	183
	82	23	81	60	1173	127	124	160	689	162							767	389	1346	190	39	232	702	127	25	302
	48	12	101	4	1142	179	30	197	798	169							1043	233	826	197	0	67	806	214	236	199
	27	10	267	112	605	199	93	182	939	189							1387	224	1214	298	11	22	1030	105	264	91
	51	2	106	15	667	113	27	137	942	153							1329	311	769	456	25	39	1308	166	186	120
	126	0	15	5	986	148	102	170	728	282							1216	324	584	545	11	71	1426	170	45	139
	139	0	24	83	825	129	144	173	805	240							1164	224	573	620	18	5	1735	117	44	63
	116	3	114	24	1080	215	238	70	864	153							991	204	316	648	79	44	1634	55	8	80
	110	2	733	31	1080	262	100	132	861	82							969	245	918	402	46	72	1713	48	0	158
	65	0	1312	1	861	287	152	117	949	32							857	236	1015	346	11	158	1613	25	0	72
	90	7	1966	0	591	205	258	143	793	22							884	264	938	213	61	175	1473	34	35	38
	54	1	2043	0	618	184	114	198	459	27							914	232	1267	173	45	157	1776	42	371	43
	110	3	1960	2	444	159	169	114	677	90							855	232	1738	42	43	143	2540	164	622	14
	60	0	1908	0	203	141	91	39	764	183							627	151	1539	91	18	149	2765	203	570	11
	139	0	1571	0	251	172	80	50	705	55							386	123	1215	58	2	210	2430	65	373	16
	98	0	1326	22	501	214	21	169	594	125							624	135	1426	34	1	299	2058	47	398	41
	146	0	1006	44	531	176	66	155	542	12							566	151	1882	117	0	447	1968	146	318	41
	38	1	1089	65	384	132	71	92	564	179							438	82	2010	214	42	471	2179	192	277	22
	54	4	1019	75	351	200	84	315	520	35							447	69	1427	220	461	550	2574	167	329	17
	141	11	708	110	239	256	113	209	626	18							290	10	659	187	552	741	2099	100	369	0
	189	9	224	95	540	106	132	212	767	108							590	52	768	181	671	639	2078	181	321	0
	154	5	290	14	590	199	61	127	726	78							862	24	1052	280	402	479	2309	155	206	1
	186	10	186	1	500	108	58	27	548	74							899	46	777	359	416	292	2354	245	232	58
	165	13	160	15	543	57	20	135	528	34							623	15	488	456	514	140	2083	222	188	134
	183	18	361	0	663	6	18	53	514	122							629	19	464	410	533	172	2268	201	155	123
	209	0	227	0	524	67	132	12	641	128							376	24	432	546	605	258	2189	70	301	371
	227	0	267	0	457	154	94	58	567	12							580	68	489	643	641	382	1929	30	171	260
	333	3	514	6	459	183	53	2	356	0							657	43	458	550	545	396	1738	11	156	132
	223	21	393	0	359	215	59	53	401	110							539	26	471	511	585	473	1089	141	243	223
	256	54	477	14	220	138	43	35	556	36							508	37	247	602	479	403	1288	160	295	107
	136	0	313	210	206	107	31	15	597	10							784	65	528	602	578	319	1429	70	253	140
	284	1	323	296	193	128	22	5	709	0							989	8	290	524	672	313	894	43	151	109
	76	6	279	277	297	208	16	2	580	130							996	9	332	369	773	246	982	154	285	172
	322	1	216	327	245	196	2	41	671	108							1076	6	386	391	775	214	844	155	254	160
	201	1	57	265	77	248	4	5	921	125							1104	37	331	411	640	275	791	261	220	165
	310	20	11	191	168	204	1	33	812	40							841	33	461	342	610	279	563	117	287	25
	258	18	38	264	197	210	0	51	915	72							602	182	423	353	355	264	551	146	325	105
	381	32	102	243	152	74	0	79	864	117							512	172	1344	371	529	203	657	63	252	125
	336	10	77	71	98	16	0	123	412	221							596	267	1689	269	527	200	757	43	302	70
	243	0	56	232	28	12	0	203	612	176							782	173	1628	462	357	264	911	195	200	6
	216	9	30	270	30	20	0	193	524	72							779	218	1577	360	223	241	1076	155	360	254
	286	1	45	498	133	0	3	99	733	65							497	166	1664	418	235	229	663	225	243	82
	284	0	10	581	16	0	0	43	776	21							363	126	1401	325	309	161	1103	211	170	127
	170	4	64	606	109	0	1	59	584	115							382	35	1088	314	446	204	834	208	257	95
	236	3	207	541	165	0	6	52	684	144							203	23	890	192	420	297	760	246	362	34
	192	0	269	626	42	0	7	121	704	172							377	71	710	311	271	309	1116	255	190	61
	360	5	100	945	15	0	70	71	610	7							317	243	785	349	514	280	765	249	294	149
	186	5	40	902	27	8	163	30	582	50							198	461	469	290	712	211	960	109	180	17
	220	14	37	671	71	5	13	14	793	31							197	545	476	236	635	167	1174	281	240	53
	163	55	7	617	83	5	14	43	558	47							38	571	269	302	517	164	765	299	150	42
	156	7	89	497	13	0	98	57	364	150							228	527	100	313	315	95	913	185	199	15
	196	41	35	330	279	3	23	14	360	128							216	371	316	255	465	38	914	271	214	52
	115	77	195	212	744	0	8	65	306	288							94	384	376	129	542	112	786	109	190	73
	172	45	511	259	1154	0	43	102	442	191							45	304	280	167	396	230	825	179	113	32
	115	2	741	178	1274	0	2	17	540	247							27	321	97	161	430	270	1019	180	122	101
	166	0	991	253	1254	0	101	92	469	309							7	323	193	233	390	237	885	185	351	5
	101	5	1224	281	947	0	9	48	333	198							29	341	281	203	487	8	480	248	360	99
	189	9	1227	170	717	11	16	3	246	218							685	380	271	163	366	255	925	279	223	34
	149	8	948	166	503	0	33	48	162	238							947	516	429	197	404	243	657	223	230	14
	126	21	752	100	372	3	1	8	165	179							1094	613	271	295	401	188	178	88	257	81
	143	11	982	144	369	0	21	19	141	58							1123	577	215	432	436	249	132	44	395	139
	134	0	940	82	175	0	30	3	344	78							862	592	384	419	194	275	242	137	531	55
	148	1	788	137	167	0	4	59	287	6							905	532	241	819	151	231	320	56	770	18
	93	16	702	148	184	0	4	71	221	31							694	594	181	944	44	250	563	65	854	77
	178	45	550	179	148	2	21	160	153	46							512	476	193	921	224	147	412	79	491	100
	127	10	484	217	166	3	0	169	106	3							479	220	168	994	327	191	196	191	368	97
	324	4	778	271	184	0	13	162	63	11							348	202	105	931	286	202	335	41	352	141
	137	38	958	193	95	8	5	81	185	65							521	161	41	1032	205	140	389	17	400	154
	113	13	842	260	53	15	3	53	28	52							502	205	36	817	257	129	1128	40	386	107
	147	1	873	441	12	0	9	38	143	455							573	119	77	949	543	52	1455	275	340	148
	149	12	787	303	9	0	0	25	74	504							374	32	73	875	450	72	1326	344	581	12
	169	0	658	237	90	53	0	94	133	577							338	128	118	772	244	57	979	297	816	87
	132	24	593	226	112	190	0	139	15	668							802	54	240	562	504	84	1120	332	748	121
	158	33	533	189	225	318	6	134	160	646							898	84	121	535	479	73	814	289	476	118
	94	76	411	364	413	347	0	189	4	469							966	100	16	686	308	28	461	202	384	75
	117	41	491	462	544	310	0	139	21	322							985	95	45	503	173	52	589	248	408	190
	105	19	732	573	587	319	0	111	59	334							734	18	107	353	182	96	342	161	389	227
	113	10	725	388	406	278	0	27	3	249							796	14	11	408	232	69	430	108	312	240
	86	2	476	459	227	283	0	44	134	275							1036	57	46	346	215	139	723	58	389	221
	104	0	502	381	160	168	0	58	142	538							769	106	59	341	140	157	775	84	472	216
	118	131	359	654	148	196	1	80	65	465							984	85	3	250	154	191	648	49	434	230
	76	203	441	433	254	248	0	112	19	539							1025	112	55	229	229	117	434	60	329	240
	68	150	417	585	359	241	1	56	90	543							835	71	71	347	401	44	273	115	361	179
	75	121	464	467	384	303	0	11	156	463							710	23	22	522	503	93	307	131	397	190
	21	86	501	173	429	349	0	39	79	401							570	25	125	620	405	127	711	104	336	197
	54	77	513	399	529	365	0	79	188	482							453	12	64	475	172	107	540	107	324	33
	36	110	465	493	564	250	0	69	55	422							232	143	27	295	242	87	139	71	429	159
	10	62	474	463	641	390	0	26	156	230							85	197	66	282	306	83	509	54	520	182
	34	29	419	531	664	323	0	78	258	384							82	154	10	486	336	6	544	109	340	98
	10	63	458	565	733	233	0	121	342	312							165	196	77	471	393	46	288	103	388	107
	1	53	455	519	713	257	0	130	443	268							85	298	56	483	357	84	389	63	459	164
	63	39	429	606	781	244	0	24	373	191							115	442	7	483	387	29	637	104	562	21
	32	96	400	654	951	366	0	169	279	38							53	437	42	588	359	24	250	82	504	83
	54	154	237	567	959	368	0	73	356	18							83	373	45	497	455	8	313	73	470	12
	23	162	161	368	922	177	0	141	457	10							132	397	11	517	513	5	268	96	516	5
	17	185	53	276	906	160	1	27	567	2							248	364	100	441	517	1	225	129	689	23
	78	187	281	237	1128	264	2	164	619	5							273	376	71	443	599	1	214	103	536	100
	62	210	238	257	1194	331	158	164	340	2							181	302	35	309	464	0	252	104	468	64
	11	117	102	158	1082	350	336	128	433	21							143	263	6	355	435	0	227	138	452	27
	24	156	113	201	928	294	332	152	441	0							157	162	0	293	658	0	216	141	370	5
	58	76	203	290	891	326	264	179	610	1							187	206	2	176	447	16	26	111	362	27
	32	24	302	111	1117	435	210	249	808	0							91	247	0	285	598	76	164	164	341	61
	76	30	434	73	972	413	161	223	881	26							59	342	0	471	345	222	185	147	460	122
	45	27	465	314	813	235	71	239	680	39							10	295	0	324	415	234	370	56	541	92
	11	68	441	352	775	257	45	168	898	273							78	287	0	328	521	213	248	95	409	38
	62	10	399	424	738	237	30	157	880	420							42	388	2	578	604	199	111	65	389	85
	95	22	495	402	739	290	14	164	856	295							35	341	484	559	672	203	419	57	406	87
	62	27	120	330	920	307	9	156	692	186							119	462	772	402	684	158	300	79	616	28
	49	26	147	236	842	318	95	223	642	145							72	271	628	312	513	129	296	89	654	15
	119	69	271	307	744	373	146	44	675	62							163	313	467	303	395	183	208	72	477	58
	98	12	245	361	874	386	67	264	715	37							67	344	353	113	376	305	197	63	339	29
	55	7	114	436	846	480	148	230	679	13							123	243	298	236	342	429	102	149	357	41
	65	15	236	585	725	578	68	187	505	42							74	235	352	508	376	460	258	242	212	50
	36	9	561	374	690	606	51	194	318	112							59	87	411	472	348	546	280	207	328	42
	139	14	445	455	643	715	94	106	330	101							23	149	378	393	329	539	233	164	178	42
	174	10	448	615	498	782	204	108	388	98							9	248	427	126	427	388	225	149	180	48
	90	19	329	528	684	835	304	201	537	220							22	206	346	62	390	368	94	193	200	191
	132	49	401	315	798	667	370	118	465	310							58	136	413	60	436	347	63	236	70	204
	46	24	530	314	776	656	343	47	307	291							3	124	411	167	562	289	199	240	402	149
	75	32	517	351	504	592	259	189	289	79							11	88	290	167	524	293	393	89	432	132
	156	13	415	345	555	431	80	65	192	59							0	131	150	254	353	331	250	39	189	173
	188	2	255	489	667	246	269	135	113	81							17	75	52	226	319	313	74	55	147	120
	222	1	170	442	604	202	167	90	95	129							0	132	61	174	285	263	90	25	169	95
	206	1	315	572	582	213	194	176	59	190							1	162	21	240	210	206	168	44	31	63
	76	0	356	525	378	281	270	164	80	233							19	107	14	253	58	200	94	102	13	218
	81	3	185	486	272	248	260	127	15	262							69	130	20	115	18	243	97	74	2	338
	127	3	127	388	273	227	336	54	17	190							44	164	15	23	77	248	230	55	14	514
	74	2	114	515	345	172	306	64	4	111							21	125	5	22	114	344	130	133	102	575
	32	0	219	623	374	141	309	65	52	104							14	122	0	2	63	406	178	109	203	674
	24	0	204	417	313	103	185	25	22	98							49	206	36	1	111	376	121	63	68	902
	23	0	148	340	355	44	122	17	72	39							77	191	0	9	216	332	360	72	242	971
	2	0	157	365	235	30	173	6	97	20							4	145	11	27	388	390	362	3	262	947
	0	0	217	242	86	11	143	1	17	5							7	128	0	1	463	394	189	21	124	826
	7	0	229	222	54	10	64	5	24	2							1	117	5	36	368	276	236	0	371	639
	50	2	240	142	94	9	142	2	22	25							19	103	32	73	348	140	188	0	154	677
	34	0	175	48	92	6	82	9	0	13							79	135	0	43	265	259	134	1	23	674
	19	0	167	49	84	1	79	90	0	9							49	107	0	69	282	258	116	10	12	578
	55	0	311	42	19	0	77	99	64	11							4	114	1	179	248	241	14	4	27	460
	65	0	411	120	49	0	28	40	210	0							43	125	1	98	186	201	40	0	2	479
	30	0	435	155	23	0	46	30	494	0							113	88	14	13	120	74	88	0	159	353
	45	0	365	135	108	0	36	67	436	0							9	113	0	11	60	59	53	0	248	431
	23	0	280	131	82	0	6	72	348	0							58	117	4	137	25	18	31	17	226	553
	15	0	331	204	25	0	3	29	259	6							11	95	7	96	2	55	131	42	316	752
	119	0	281	252	0	1	5	48	128	123							49	113	11	49	2	141	1	4	69	523
	148	0	326	496	0	0	15	81	130	186							82	147	17	65	0	135	86	7	79	416
	32	0	494	688	1	0	3	32	80	121							57	102	5	20	0	33	1	0	309	344
	57	0	429	739	0	0	16	36	75	45							31	154	26	25	0	23	11	0	451	391
	35	0	442	677	0	0	36	16	116	6							118	262	1	45	0	40	20	1	641	403
	5	0	245	691	0	0	28	2	173	0							16	239	33	19	0	29	2	11	992	420
	46	0	218	792	0	0	12	0	60	1							1	211	0	111	4	65	10	20	882	302
	68	0	486	754	0	0	0	14	74	0							8	184	15	263	0	56	11	4	603	327
	17	0	611	658	0	1	0	3	30	0							9	217	0	263	2	107	43	0	415	50
	4	0	521	690	0	0	0	0	1	0							72	160	12	116	0	85	1	0	152	184
	3	0	744	858	0	0	0	0	37	0							161	55	20	230	0	65	35	0	61	197
	7	0	752	919	0	0	1	0	11	0							72	85	0	161	0	37	20	1	59	174
	0	0	817	756	0	0	0	0	9	0							26	203	0	110	0	35	0	0	83	263
	0	0	654	940	2	0	0	0	38	0							66	187	0	71	0	102	0	0	85	263
	6	0	599	779	0	0	0	0	15	17							67	165	18	37	0	1	0	0	59	195
	0	0	551	612	0	0	0	0	5	307							48	101	3	92	2	8	0	0	56	100
	0	0	519	527	0	0	0	0	20	475							56	105	36	49	0	7	15	0	354	328
	0	0	482	509	0	0	0	0	7	408							75	212	51	32	0	41	0	0	650	230
	0	0	490	737	0	2	0	0	17	189							46	219	699	1	0	2	31	0	611	251
	1	0	411	545	0	0	0	0	28	126							43	209	991	0	0	7	7	0	643	471
	1	2	326	489	0	0	0	0	0	22							29	125	1143	0	0	0	17	0	573	677
	0	0	372	570	0	1	1	0	34	61							13	95	1095	0	0	0	32	0	542	500
	0	0	401	593	0	5	0	0	6	43							4	171	1044	0	0	1	11	0	507	460
	2	0	334	411	0	3	0	0	9	55							121	225	771	0	0	0	242	0	467	443
	1	39	265	391	0	0	0	0	1	10							194	149	375	0	0	2	481	0	394	404
	0	186	259	353	0	3	0	0	99	1							248	239	439	5	0	1	294	0	235	466
	1	274	169	363	0	0	0	0	707	0							67	175	607	0	0	0	475	0	383	416
	0	305	261	498	0	13	0	0	1193	0							40	238	385	10	0	4	589	0	425	440
	1	347	317	367	0	0	0	0	1431	0							12	117	329	6	10	0	595	0	749	441
	0	358	339	361	0	0	0	0	1363	3							13	95	486	0	172	1	436	0	1097	602
	0	317	365	341	0	0	0	0	1201	0							30	94	602	0	447	0	740	0	995	258
	0	232	502	323	1	0	0	0	1029	0							9	216	249	11	372	10	658	1	796	116
	0	95	413	389	0	7	0	0	1340	0							1	465	402	0	321	6	625	0	677	91
	0	82	449	508	0	0	0	0	1257	0							14	505	336	7	253	3	805	7	518	201
	0	62	515	498	0	0	0	0	861	0							33	540	24	2	216	11	931	17	419	298
	0	125	503	487	1	0	0	0	677	0							48	382	43	0	159	31	1038	30	394	399
	2	145	582	437	0	0	0	1	688	4							22	348	40	0	147	6	916	47	426	365
	1	329	369	407	0	2	0	2	783	0							20	286	16	0	180	11	788	15	353	530
	0	503	363	288	0	0	0	0	629	0							8	170	37	0	245	0	907	5	232	386
	0	436	539	291	0	2	0	0	942	0							11	50	7	0	252	0	965	5	248	374
	14	372	452	203	0	1	0	0	842	0							3	37	5	0	235	0	1087	6	263	391
	88	308	399	121	0	0	0	0	904	0							4	304	0	2	273	7	990	27	286	581
	271	257	318	103	0	0	1	0	910	0							2	157	3	0	197	0	1042	23	229	515
	185	259	218	128	0	0	0	0	672	1							12	73	117	2	190	3	1038	29	323	452
	56	245	205	112	0	2	0	1	673	0							6	70	770	0	87	0	892	10	360	425
	164	159	202	145	0	0	0	0	671	0							4	10	732	0	169	0	855	18	433	335
	180	194	25	185	0	1	0	0	656	0							27	68	776	3	163	0	662	16	583	257
	207	187	42	162	0	0	0	0	713	0							3	73	636	0	11	0	355	18	578	305
	431	184	62	70	0	0	0	0	899	0							13	103	428	25	69	0	924	29	683	395
	433	163	46	36	0	1	0	0	1070	0							4	123	282	25	130	0	1447	62	543	346
	495	172	46	36	0	0	0	0	975	0							6	110	279	0	72	0	717	60	301	174
	608	125	4	77	0	0	0	0	968	0							2	258	194	0	147	0	1242	152	279	144
	763	118	5	49	0	0	0	0	940	0							23	326	24	8	61	0	1153	121	317	100
	665	119	0	9	0	0	0	0	922	0							11	323	65	124	5	0	901	36	303	26
	629	120	1	1	1	2	0	0	1010	0							9	227	296	201	0	0	707	11	347	10
	534	102	0	0	0	0	0	0	972	0							75	334	835	301	57	0	700	1	401	54
	420	152	0	2	0	7	0	0	1025	0							186	366	1051	359	103	0	754	0	187	87
	279	108	0	4	0	0	0	0	930	0							121	311	987	193	30	0	661	27	233	83
	304	95	0	0	0	1	0	0	957	0							112	359	849	70	4	0	720	28	122	101
	197	89	0	0	0	0	0	0	988	0							217	291	624	141	7	0	465	9	67	97
	142	106	0	1	0	0	0	0	1099	0							267	269	492	291	39	0	597	26	102	101
	106	186	0	0	0	4	1	0	1077	0							351	155	654	248	30	0	352	16	72	101
	296	264	0	0	0	0	0	0	1173	0							339	277	1029	131	30	0	791	12	154	140
	394	358	0	0	0	0	0	0	1383	0							383	292	1192	45	22	0	609	7	137	97
	465	407	0	0	1	0	0	0	1043	0							303	117	1143	197	12	0	792	4	72	132
	494	285	0	0	0	0	0	0	975	0							236	80	1030	84	3	0	650	25	85	234
	557	247	1	2	0	9	0	0	942	1							90	80	844	144	1	0	540	23	98	332
	428	253	0	0	0	0	0	0	917	0							209	142	648	204	0	0	627	8	102	487
	338	371	0	0	0	1	0	0	1035	0							163	303	706	166	0	0	944	61	24	474
	188	392	0	0	0	0	0	0	994	0							161	475	750	171	0	0	755	121	0	382
	255	273	0	0	0	3	0	0	900	0							112	545	824	76	0	0	786	150	13	316
	410	112	0	0	0	0	0	0	871	0							69	467	673	187	0	0	803	78	27	378
	471	153	0	0	0	0	0	0	726	0							73	542	798	342	4	0	301	54	22	303
	468	163	0	0	0	0	0	0	487	0							202	709	947	332	1	0	859	52	14	198
	436	219	0	0	0	0	0	0	457	0							341	697	597	351	1	0	706	30	0	164
	369	197	0	0	0	7	0	0	337	0							425	660	425	317	0	0	410	14	1	203
	274	117	0	0	0	0	0	0	376	95							259	630	587	283	15	0	503	25	0	247
	172	38	0	0	0	2	0	0	267	273							258	823	974	222	6	1	330	22	0	296
	88	77	0	0	1	0	0	0	343	245							339	750	1051	229	9	8	230	20	0	232
	34	231	1	0	0	2	0	0	265	85							476	603	501	139	0	9	305	3	0	214
	80	55	0	0	0	3	0	0	266	15							253	323	553	177	2	0	402	13	0	201
	80	95	1	0	0	0	0	0	334	24							205	494	578	281	14	2	221	8	0	100
	78	36	2	0	0	5	0	0	372	29							27	753	731	245	1	0	102	31	0	45
	86	11	0	0	0	37	0	0	346	5							11	790	791	173	109	0	48	107	0	255
	85	1	0	0	0	177	0	0	286	2							6	736	789	386	78	0	99	104	0	178
	87	6	0	0	0	174	0	0	276	0							0	571	782	245	1	0	55	34	2	183
	53	0	0	0	0	122	0	0	137	0							0	384	765	245	122	0	85	7	0	62
	26	17	0	134	0	38	0	0	288	0							0	465	871	223	146	0	339	0	0	182
	7	0	0	252	0	48	0	0	325	0							0	390	644	179	96	0	406	0	54	85
	26	0	1	188	0	56	0	0	178	0							1	366	589	203	96	0	154	0	84	61
	3	0	0	98	0	102	0	0	159	1							0	211	564	162	90	0	104	15	59	31
	1	0	0	85	0	83	0	0	224	2							5	253	519	136	52	0	206	12	86	9
	0	0	0	83	0	75	0	0	122	1							0	308	446	205	210	0	333	4	31	4
	1	0	0	94	0	125	0	0	59	0							0	134	439	235	192	0	449	10	34	15
	0	0	0	48	0	109	0	0	47	0							0	300	555	196	245	1	167	1	65	1
	1	0	0	27	0	89	0	0	88	0							0	250	672	132	320	0	296	0	53	15
	2	0	0	19	0	112	0	0	41	0							0	303	761	147	290	0	431	0	83	0
	2	0	0	0	0	117	0	0	154	0							0	282	410	288	490	0	299	0	80	0
	3	0	0	6	1	49	0	0	242	0							404	151	447	435	595	0	471	7	45	5
	8	0	0	0	0	70	0	0	117	0							729	79	316	356	578	0	464	21	94	1
	0	0	0	0	0	84	0	0	49	0							650	475	320	389	483	0	379	12	111	5
	0	0	0	29	0	58	0	0	97	0							590	939	326	276	380	0	632	12	115	0
	2	0	0	37	0	74	0	0	80	0							513	1154	345	327	338	0	492	18	140	34
	0	0	0	0	0	141	0	0	120	0							422	1246	448	352	224	0	688	0	299	78
	1	0	0	0	0	243	0	0	78	0							265	1307	333	266	257	0	727	0	313	327
	0	0	0	0	0	172	0	0	11	0							237	1119	197	193	202	0	554	12	246	577
	0	0	0	0	0	103	0	0	43	0							278	706	135	230	213	0	428	5	300	402
	1	0	0	3	0	167	0	0	63	0							107	501	178	149	120	0	549	4	343	259
	0	0	0	0	0	230	0	0	5	0							94	575	253	72	35	0	151	3	380	225
	0	0	0	0	0	247	0	0	112	0							238	520	166	9	10	0	375	8	325	124
	0	0	0	0	0	340	0	1	52	0							740	278	288	14	0	0	851	9	316	139
	1	0	0	0	0	434	0	0	2	1							802	230	280	71	0	0	918	1	307	123
	0	0	0	0	0	507	0	2	6	60							707	365	239	58	8	0	911	10	345	72
	0	0	0	0	0	464	0	128	1	206							529	381	304	21	1	0	633	14	346	174
	0	0	0	0	0	396	0	230	0	169							405	385	294	3	8	0	665	5	428	149
	0	0	0	0	0	380	0	238	0	135							248	557	235	14	70	0	662	7	457	83
	0	0	0	0	0	277	0	127	1	133							88	591	209	0	587	0	548	9	487	248
	0	0	0	0	0	165	0	82	0	90							128	779	159	0	983	0	686	54	487	224
	0	0	0	0	0	224	0	74	4	57							143	940	199	19	799	0	930	151	363	110
	0	0	0	0	0	277	0	70	0	46							176	689	112	6	590	0	683	156	380	123
	0	0	0	0	0	201	0	83	0	59							248	394	256	1	400	0	601	107	452	122
	1	0	0	0	0	123	0	101	0	82							224	507	141	7	491	0	523	65	307	89
	0	0	0	0	0	166	0	154	0	40							270	322	122	3	496	0	372	56	420	52
	0	0	0	0	0	101	0	205	1	12							250	432	133	4	259	0	648	57	357	39
	0	0	0	0	0	34	0	155	0	18							144	274	132	7	271	0	908	31	412	213
	0	0	0	0	0	64	0	104	0	16							164	270	166	1	355	0	870	36	407	191
	0	0	0	0	0	64	0	93	1	8							111	320	46	7	555	0	904	5	504	30
	0	0	1	0	0	14	0	69	0	5							211	136	166	1	437	0	883	1	383	106
	0	0	0	0	0	42	0	124	0	0							248	161	182	0	261	0	929	1	395	31
	0	0	0	0	0	25	0	92	2	0							187	231	92	1	442	0	889	0	392	128
	0	0	0	0	0	36	0	22	0	0							288	165	87	0	492	0	1079	0	444	119
	0	0	0	0	0	22	0	1	0	0							363	198	68	0	670	0	1007	2	392	61
	0	0	0	0	0	35	0	0	0	0							223	383	75	2	669	0	877	0	364	116
	0	0	0	0	0	56	0	3	2	0							456	259	38	33	587	0	603	5	281	99
	0	0	0	2	0	59	0	2	0	1							944	200	102	1	610	1	814	2	371	154
	0	0	0	40	0	58	0	2	0	0							840	255	146	224	795	0	564	0	340	91
	0	0	0	123	0	53	0	0	1	0							747	309	111	239	826	0	500	0	307	202
	0	0	0	102	0	50	0	0	0	0							752	396	148	250	536	0	731	0	331	134
	0	0	0	77	0	47	0	0	0	0							686	481	68	227	504	0	716	0	299	289
	44	0	1	48	0	50	0	0	0	0							824	293	115	54	405	0	673	0	381	231
	128	0	0	19	0	36	0	0	0	0							784	165	59	174	434	1	506	1	292	219
	113	0	0	50	0	4	0	0	0	0							708	132	14	246	511	0	456	5	354	171
	95	0	0	123	0	0	0	0	0	0							730	248	15	215	750	0	583	22	404	194
	127	0	0	216	0	14	0	0	3	0							730	186	91	181	956	0	825	67	394	279
	153	0	0	171	0	39	0	0	0	0							827	577	151	214	867	0	1189	84	269	152
	173	0	0	161	0	1	0	0	0	0							892	875	54	171	862	0	1268	27	165	244
	170	0	0	103	0	0	0	0	0	0							1035	1038	60	142	902	0	1176	16	103	428
	102	0	0	70	0	0	0	0	0	0							1140	1100	12	58	689	0	908	4	90	44
	44	0	0	63	0	1	0	0	0	0							1121	781	54	67	690	0	790	0	63	104
	49	0	0	18	0	14	0	0	0	0							1526	519	146	112	718	0	487	14	117	112
	94	0	0	10	0	0	0	0	0	0							1281	532	147	104	422	0	380	17	184	88
	146	0	0	4	0	0	0	0	0	0							1463	508	113	98	182	0	636	44	146	127
	80	0	0	0	0	0	0	0	0	0							1650	484	233	177	269	0	526	30	96	143
	128	0	0	2	0	0	0	0	0	0							1986	607	123	210	205	0	696	34	159	296
	245	0	0	4	0	0	0	0	0	0							1818	518	197	171	153	0	752	50	167	394
	236	0	0	0	0	0	0	0	0	0							1671	385	228	250	295	0	608	31	252	354
	123	0	0	1	0	0	0	0	0	0							2024	105	99	319	476	0	252	31	225	307
	18	0	0	0	0	0	0	0	0	0							1732	92	193	303	356	0	353	14	153	255
	27	0	0	0	0	0	0	0	0	0							1592	123	276	340	183	0	484	11	190	168
	40	0	0	0	0	4	0	0	0	0							1958	247	414	393	454	0	797	22	210	101
	86	0	0	0	0	0	0	0	0	0							1976	332	303	349	453	0	894	20	192	115
	95	0	0	0	0	0	0	0	0	0							1700	227	174	303	397	0	860	18	203	112
	77	0	0	0	0	0	0	0	0	0							1564	281	202	211	402	0	798	24	277	220
	117	0	0	0	0	0	0	0	0	0							1680	179	395	222	174	0	821	8	167	281
	99	0	0	0	0	0	0	3	0	0							1569	177	315	113	208	0	893	8	310	194
	35	0	0	0	0	0	0	48	0	0							1296	172	340	127	163	0	1002	3	282	100
	67	0	0	0	0	0	0	104	0	0							1154	7	306	200	163	0	1273	42	144	115
	33	0	0	0	0	0	0	113	0	0							1089	134	62	259	60	0	1279	6	137	59
	24	0	0	6	0	0	0	43	0	0							1236	36	139	270	165	0	1330	24	128	173
	52	0	0	0	0	2	0	11	0	0							1304	78	107	251	86	0	1243	7	67	236
	82	0	0	0	0	6	0	5	0	0							1379	22	73	338	12	0	1530	8	113	109
	37	0	0	0	0	0	0	2	0	60							1390	19	314	367	28	0	1582	11	106	178
	18	0	0	0	0	0	0	9	0	170							1315	45	391	559	19	0	1571	4	192	225
	20	0	0	0	0	0	0	16	0	75							1166	91	412	582	41	0	1562	0	239	267
	63	0	0	0	0	0	0	39	0	27							1000	29	383	384	25	0	1788	0	241	334
	92	0	0	0	0	3	0	64	0	10							742	49	313	368	22	0	1859	0	177	315
	151	0	0	0	0	0	0	64	0	0							648	196	235	418	29	0	1833	13	173	218
	106	0	0	0	0	0	0	61	0	9							591	131	226	205	57	0	1549	4	196	142
	107	0	0	0	0	0	0	30	0	6							550	20	170	294	75	0	1505	7	245	107
	68	0	0	0	0	0	0	3	0	0							557	152	72	517	116	0	1594	4	229	101
	36	0	0	0	0	1	0	0	0	0							628	109	33	660	134	0	1673	2	152	165
	7	0	0	0	0	0	0	0	0	0							764	253	104	590	158	0	1633	0	100	132
	4	0	0	0	0	0	0	0	0	0							957	111	160	686	198	0	1526	0	130	49
	7	0	0	0	0	0	0	0	0	0							1235	164	366	563	233	0	1528	0	150	45
	6	0	0	0	0	0	0	2	0	0							1281	121	490	350	262	1	1784	13	82	67
	2	0	0	0	0	0	0	0	0	0							988	144	429	353	409	123	1632	3	120	21
	12	0	0	0	0	0	0	0	0	0							839	30	419	315	515	80	1888	1	170	43
	7	0	0	0	0	1	0	0	0	0							888	314	407	345	542	20	2237	2	240	30
	15	0	0	0	0	0	0	19	0	0							811	299	383	380	644	20	1663	2	222	0
	0	0	0	0	0	0	0	66	0	0							747	49	407	349	391	39	1325	1	91	0
	0	0	0	0	0	1	0	133	0	0							631	18	418	376	248	38	1836	3	151	2
	1	0	0	0	0	0	0	117	0	0							555	33	227	278	287	12	1992	12	191	26
	2	0	0	0	0	0	0	99	0	25							650	41	265	238	149	16	1663	2	134	48
	0	0	0	0	0	0	0	64	0	153							710	114	329	194	121	9	1241	12	110	0
	0	0	0	0	0	0	0	8	0	206							573	41	245	338	139	1	1324	5	147	10
	1	0	0	0	12	1	0	0	0	175							448	137	180	563	317	19	1877	5	129	0
	2	0	0	0	35	0	0	3	0	83							326	87	111	725	435	90	1327	0	147	0
	0	0	0	0	103	0	0	2	0	27							224	28	92	619	485	150	1301	1	131	41
	0	0	0	0	281	0	0	0	0	1							159	35	162	714	274	154	1278	18	106	105
	0	0	0	0	234	0	0	0	0	9							312	25	426	693	146	141	998	1	195	253
	0	0	0	0	146	0	0	0	0	0							156	75	420	736	148	196	1225	25	69	254
	0	0	0	0	139	0	0	0	0	0							123	27	418	555	128	268	903	69	140	171
	0	0	0	0	60	0	0	0	0	0							223	60	325	399	52	294	815	112	147	177
	0	0	0	0	202	0	0	0	0	0							303	19	201	509	82	412	849	41	142	45
	0	0	0	0	245	0	0	0	0	0							352	5	147	501	72	479	583	26	262	52
	0	0	0	0	256	0	0	0	0	0							246	43	270	367	40	434	659	11	232	7
	0	0	0	0	379	1	0	0	0	0							272	48	159	368	163	391	704	7	226	61
	0	0	0	0	304	0	0	0	0	0							285	1	197	241	235	403	634	15	224	76
	0	0	0	0	300	1	0	0	0	0							198	27	211	167	163	452	713	10	128	186
	0	0	0	0	392	1	0	0	0	0							212	14	38	201	146	448	835	2	278	163
	0	0	0	0	419	1	0	0	0	0							418	10	64	199	130	546	561	16	206	163
	0	0	0	0	665	5	0	0	0	0							406	0	32	97	60	629	539	1	120	177
	0	0	0	0	654	0	0	0	0	0							255	25	83	90	92	567	781	3	244	27
	0	0	0	0	591	0	0	0	0	0							309	8	171	101	92	412	752	5	219	43
	0	0	0	0	462	0	0	0	0	0							437	9	221	148	179	513	631	8	169	10
	0	0	0	0	315	0	0	0	0	0							485	18	132	137	173	382	476	9	160	15
	0	0	0	0	237	3	0	0	0	0							488	38	241	201	116	458	595	5	132	112
	0	0	0	0	120	0	0	0	0	0							424	2	122	262	94	538	429	10	163	108
	0	0	0	0	263	0	0	0	0	0							310	8	21	219	63	634	633	2	208	46
	0	0	0	0	423	0	0	0	0	0							177	19	6	149	66	534	741	6	119	97
	0	0	0	0	436	0	0	0	0	0							122	6	66	228	110	535	914	19	99	0
	0	0	0	0	466	0	0	0	0	0							67	3	17	112	101	710	1049	3	122	2
	0	0	0	0	397	0	0	0	0	0							160	4	4	340	56	818	968	7	107	68
	0	0	0	0	298	0	0	0	0	0							158	5	105	145	13	593	509	1	179	88
	0	0	0	0	388	0	0	0	0	0							128	2	34	230	15	726	233	10	216	6
	0	0	0	0	317	0	0	0	0	0							71	5	40	231	19	704	262	0	151	51
	0	0	0	0	512	0	0	0	0	0							186	58	65	69	6	816	696	18	148	0
	0	0	0	0	610	0	0	0	0	0							176	166	117	124	0	546	1131	48	134	0
	0	0	0	0	582	0	0	0	0	0							160	56	45	157	2	516	1103	16	59	29
	0	0	0	0	474	0	0	0	0	2							182	1	16	188	11	774	773	12	146	50
	0	0	0	0	318	0	0	0	0	0							152	0	22	182	26	709	714	8	110	0
	0	0	0	0	238	0	0	0	0	3							215	0	31	135	7	427	785	18	38	0
	0	0	0	0	342	6	0	0	0	41							256	0	102	139	0	325	623	2	40	24
	0	0	0	0	316	0	0	0	0	89							107	0	43	246	0	336	540	0	3	2
	0	0	0	0	293	3	0	0	0	16							211	0	48	170	0	364	398	0	9	18
	0	0	0	0	258	0	0	0	0	0							161	1	17	74	7	379	286	6	8	16
	0	0	0	0	258	0	0	0	0	0							86	73	10	83	1	373	339	8	23	1
	0	0	0	0	301	8	0	0	0	0							70	89	23	105	59	311	452	4	12	5
	0	0	0	0	336	0	0	0	0	0							153	21	0	94	31	252	515	2	48	19
	0	0	0	0	375	0	0	0	0	0							169	22	1	157	29	253	472	1	32	38
	0	0	0	0	391	0	0	0	0	0							24	20	10	170	18	387	279	7	108	35
	0	0	0	0	451	0	0	0	0	0							208	3	3	211	0	546	128	1	73	51
	0	0	0	0	563	0	0	0	0	0							172	1	0	206	8	408	332	17	2	112
	0	0	0	0	643	0	0	0	0	0							168	0	1	205	24	412	194	8	15	237
	0	0	0	0	691	0	0	0	0	0							205	0	0	167	115	339	17	3	15	264
	0	0	0	0	637	0	0	0	0	0							170	0	2	206	186	350	173	9	0	244
	0	0	0	0	583	0	0	0	0	0							90	0	2	138	104	329	153	20	0	277
	0	0	0	0	496	0	0	0	0	0							220	0	0	99	175	341	73	40	2	237
	0	0	0	0	474	0	0	0	0	0							66	0	0	155	150	260	19	152	2	72
	0	0	0	0	396	0	0	0	0	0							127	0	0	214	112	292	5	172	0	94
	0	0	0	0	513	0	0	0	0	0							135	0	1	264	202	185	34	91	0	192
	0	0	0	0	582	0	0	0	0	0							78	0	0	258	28	144	51	19	0	219
	0	0	0	0	685	0	0	0	0	0							86	0	0	221	47	94	0	58	0	176
	0	0	0	0	799	11	0	0	0	0							69	0	0	265	141	140	26	40	0	175
	0	0	0	0	774	0	0	0	0	0							24	0	5	314	126	88	59	19	0	188
	0	0	0	0	700	1	0	0	0	0							46	0	0	259	247	102	203	39	0	221
	0	0	0	0	728	0	0	0	0	0							51	0	15	271	138	36	279	26	0	196
	0	0	0	0	661	0	0	0	0	0							3	0	145	347	33	56	121	3	0	164
	0	0	0	0	808	7	1	0	0	0							13	0	123	362	147	94	181	46	49	178
	0	0	0	0	889	0	0	0	0	0							262	0	76	373	42	91	222	87	225	77
	0	0	0	0	873	6	0	0	0	0							126	0	105	289	111	6	97	38	337	68
	0	0	0	0	746	0	0	0	0	0							60	0	58	208	79	35	111	102	340	192
	0	0	0	0	626	0	0	0	0	0							10	0	84	132	9	54	162	101	301	163
	0	0	0	0	717	9	0	0	0	0							49	0	165	342	47	32	68	48	217	118
	0	0	0	0	668	0	1	0	0	0							22	0	33	266	187	21	85	27	128	188
	0	0	0	0	686	1	0	1	0	0							64	255	99	157	16	17	27	9	85	212
	0	0	0	0	695	0	0	0	0	0							134	233	97	209	112	63	106	38	237	250
	0	0	0	0	586	10	0	0	0	0							103	115	37	307	85	38	168	29	202	258
	0	0	0	0	474	3	4	0	0	0							239	119	78	418	113	19	1	55	77	140
	0	0	0	0	462	3	0	0	0	0							135	188	94	419	181	59	77	66	81	182
