# Supplementary material for: Stimulus salience determines defensive behaviors elicited by aversively conditioned serial compound auditory stimuli
Source: eLife journal article supplement (doi:10.7554/elife.53803), 2020-03-27
Supplement: supp [file elife-53803-supp-v1.zip › elife_poa_e53803_Figure_4_source_data_2.xlsx]

## Sheet: Statistics
Figure 4 – Source Data 2
Figure panel	Group Size	Statistical test	Comparison	Significant comparisons	P-value
4E	Group 4, n=10	2-Way Repeated Measures ANOVA with Trial and Stimulus as factors	Conditioning Day 1 (trials 1-5), % freezing	Main Effect of Trial (F (4, 36) = 20.95)	p<0.0001
4E	Group 4, n=10	2-Way Repeated Measures ANOVA with Trial and Stimulus as factors	Conditioning Day 2 (trials 6-10), % freezing	Main Effect of Stimulus (F (1, 9) = 19.50)	p<0.01
4F	Group 5, n=10	2-Way Repeated Measures ANOVA with Trial and Stimulus as factors	Conditioning Day 1 (trials 1-5), % freezing	Main Effect of Trial (F (4, 36) = 23.57)	p<0.0001
4F	Group 5, n=10	2-Way Repeated Measures ANOVA with Trial and Stimulus as factors	Conditioning Day 2 (trials 6-10), % freezing	Main Effect of Stimulus (F (1, 9) = 11.16)	p<0.01
4G	Group 6, n=10	2-Way Repeated Measures ANOVA with Trial and Stimulus as factors	Conditioning Day 1 (trials 1-5), % freezing	Main Effect of Trial (F (4, 36) = 26.29)	p<0.0001
4H	Group 4, n=10	2-Way Repeated Measures ANOVA with Trial and Stimulus as factors	Conditioning Day 1 (trials 1-5), average motion	Main Effect of Trial (F (4, 36) = 33.83)	p<0.0001
4H	Group 4, n=10	2-Way Repeated Measures ANOVA with Trial and Stimulus as factors	Conditioning Day 2 (trials 6-10), average motion	Main Effect of Stimulus (F (1, 9) = 21.99)	p<0.01
4H	Group 4, n=10	2-Way Repeated Measures ANOVA with Trial and Stimulus as factors	Conditioning Day 2 (trials 6-10), average motion	Significant Interaction (F (4, 36) = 3.001)	p<0.05
4I	Group 5, n=10	2-Way Repeated Measures ANOVA with Trial and Stimulus as factors	Conditioning Day 1 (trials 1-5), average motion	Main Effect of Trial (F (4, 36) = 44.03)	p<0.0001
4I	Group 5, n=10	2-Way Repeated Measures ANOVA with Trial and Stimulus as factors	Conditioning Day 2 (trials 6-10), average motion	Main Effect of Stimulus (F (1, 9) = 7.162)	p<0.05
4J	Group 6, n=10	2-Way Repeated Measures ANOVA with Trial and Stimulus as factors	Conditioning Day 1 (trials 1-5), average motion	Main Effect of Trial (F (4, 36) = 25.17)	p<0.0001
4K	Group 4, n=10	2-Way Repeated Measures ANOVA with Trial and Stimulus as factors	escape score	Main Effect of Trial (F (9, 81) = 5.372)	p<0.0001
4K	Group 4, n=10	2-Way Repeated Measures ANOVA with Trial and Stimulus as factors	escape score	Main Effect of Stimulus (F (1, 9) = 11.84)	p<0.01
4K	Group 4, n=10	2-Way Repeated Measures ANOVA with Trial and Stimulus as factors	escape score	Significant Interaction (F (9, 81) = 3.379)	p<0.01
4L	Group 5, n=10	2-Way Repeated Measures ANOVA with Trial and Stimulus as factors	escape score	Main Effect of Trial (F (9, 81) = 3.716)	p<0.001
4L	Group 5, n=10	2-Way Repeated Measures ANOVA with Trial and Stimulus as factors	escape score	Main Effect of Stimulus (F (1, 9) = 7.967)	p<0.05
4H,J	Group 4, n=10; Group 6, n=10	2-Way Repeated Measures ANOVA with Trial and Group as factors	Conditioning Day 2 (trials 6-10), average motion to higher tone	Main Effect of Trial (F(2.5, 45.7) = 3.31)	p<0.05
4H,J	Group 4, n=10; Group 6, n=10	2-Way Repeated Measures ANOVA with Trial and Group as factors	Conditioning Day 2 (trials 6-10), average motion to higher tone	Main Effect of Group (F(1,18) = 8.64	p<0.01
4K,M	Group 4, n=10; Group 6, n=10	2-Way Repeated Measures ANOVA with Trial and Group as factors	escape score to higher tone	Main Effect of Trial (F(2.7, 48.0) = 4.36)	p<0.05
4K,M	Group 4, n=10; Group 6, n=10	2-Way Repeated Measures ANOVA with Trial and Group as factors	escape score to higher tone	Main Effect of Group (F(1,18) = 10.1	p<0.01
4L,M	Group 5, n=10; Group 6, n=10	2-Way Repeated Measures ANOVA with Trial and Group as factors	escape score to higher tone	Main Effect of Group (F(1,18) = 4.49	p<0.05
4P	Group 4, n=10	Paired t-test	Tone test, % freezing		p<0.0001
